# Supplementary material for: Mutation of vsx genes in zebrafish highlights the robustness of the retinal specification network
Source: eLife. 2023 May 25;12:e85594. doi: 10.7554/eLife.85594 (PMC10212559; doi:10.7554/eLife.85594)
Supplement: Figure 5—source data 1. — Worksheet #1. Table of contents. Worksheet #2. List of all ATAC-seq peaks upregulated in the vsxKO with adjusted p-value <0.05. Genes associated with the peak are reported in the last column. Worksheet #3. List of all ATAC-seq peaks downregulated in the vsxKO with adjusted P-value <0.05. Genes associated with the peak are reported in the last column. [file elife-85594-fig5-data1.xlsx]

## Sheet: SD1_index
worksheet_order	worksheet_title	description
1	SD1_index	Table of contents Figure 5 - Source Data 1
2	UP_peaks	List of all ATAC-seq peaks upregulated in the vsxKO with adjusted p-value < 0.05. Genes associated with the peak are reported in the last column.
3	DOWN_peaks	List of all ATAC-seq peaks downregulated in the vsxKO with adjusted p-value < 0.05. Genes associated with the peak are reported in the last column.

## Sheet: UP_peaks
peak	baseMean	log2FoldChange	lfcSE	stat	pvalue	padj	chr	start	end	gene
peak10069	42.5644	4.02528	0.779895	5.16131	2.45225e-07	0.000126439	chr1	51996063	51996356	slc44a1a
peak10089	62.156	3.42795	0.609927	5.62026	1.90665e-08	1.43936e-05	chr1	52086390	52087134	osbp
peak10089	62.156	3.42795	0.609927	5.62026	1.90665e-08	1.43936e-05	chr1	52086390	52087134	patl1
peak10094	51.6896	3.45353	0.73724	4.68441	2.80773e-06	0.0010067	chr1	52113378	52113643	osbp
peak10094	51.6896	3.45353	0.73724	4.68441	2.80773e-06	0.0010067	chr1	52113378	52113643	patl1
peak101133	135.021	1.54654	0.384079	4.02662	5.65848e-05	0.0107244	chr18	44511831	44512386	aplp2
peak101133	135.021	1.54654	0.384079	4.02662	5.65848e-05	0.0107244	chr18	44511831	44512386	prdm10
peak101138	392.366	0.885821	0.241142	3.67345	0.000239299	0.032435	chr18	44525219	44526172	aplp2
peak101138	392.366	0.885821	0.241142	3.67345	0.000239299	0.032435	chr18	44525219	44526172	prdm10
peak101913	122.421	1.44499	0.396603	3.64343	0.000269031	0.0352112	chr18	47913434	47913952	barx2
peak101913	122.421	1.44499	0.396603	3.64343	0.000269031	0.0352112	chr18	47913434	47913952	smtla
peak102116	291.924	1.14875	0.271378	4.23302	2.30577e-05	0.00535762	chr18	48720683	48721291	rps3
peak102116	291.924	1.14875	0.271378	4.23302	2.30577e-05	0.00535762	chr18	48720683	48721291	st3gal4
peak102248	962.886	0.631179	0.16524	3.81976	0.000133582	0.0204797	chr18	49312032	49312927	mob2b
peak102248	962.886	0.631179	0.16524	3.81976	0.000133582	0.0204797	chr18	49312032	49312927	yif1b
peak102792	683.505	0.823802	0.186912	4.40743	1.04602e-05	0.00285724	chr19	480577	481243	ehmt2
peak102792	683.505	0.823802	0.186912	4.40743	1.04602e-05	0.00285724	chr19	480577	481243	eomesa
peak103067	409.411	0.817632	0.228939	3.5714	0.000355083	0.043077	chr19	1476591	1477112	scrt1a
peak103067	409.411	0.817632	0.228939	3.5714	0.000355083	0.043077	chr19	1476591	1477112	slc39a4
peak103360	293.629	1.09591	0.271185	4.04119	5.31801e-05	0.0102199	chr19	2532726	2533199	nedd9
peak103360	293.629	1.09591	0.271185	4.04119	5.31801e-05	0.0102199	chr19	2532726	2533199	sp8a
peak10338	389.079	0.917302	0.238998	3.83812	0.000123981	0.0192887	chr1	53285850	53286454	acta1a
peak10357	661.339	0.745621	0.189013	3.94482	7.98586e-05	0.0139193	chr1	53331930	53332639	acta1a
peak10357	661.339	0.745621	0.189013	3.94482	7.98586e-05	0.0139193	chr1	53331930	53332639	dla
peak10361	675.295	0.71924	0.188855	3.80842	0.000139856	0.0211874	chr1	53340241	53340794	acta1a
peak10361	675.295	0.71924	0.188855	3.80842	0.000139856	0.0211874	chr1	53340241	53340794	dla
peak10367	990.029	0.620409	0.163846	3.78653	0.000152765	0.0227576	chr1	53355419	53356019	dla
peak10367	990.029	0.620409	0.163846	3.78653	0.000152765	0.0227576	chr1	53355419	53356019	rfx1b
peak104507	15.8282	7.45615	1.79916	4.14424	3.40939e-05	0.00727913	chr19	7919572	7919783	si:dkeyp-85e10.1
peak10473	61.0171	4.12504	0.676121	6.10104	1.05382e-09	1.23231e-06	chr1	53821195	53821497	si:ch211-202h22.10
peak10473	61.0171	4.12504	0.676121	6.10104	1.05382e-09	1.23231e-06	chr1	53821195	53821497	tsc2
peak105159	21.1721	4.03473	1.09811	3.67426	0.00023854	0.0323845	chr19	11398004	11398232	eepd1
peak105294	46.681	2.5853	0.663551	3.89616	9.77282e-05	0.0161749	chr19	12242701	12243114	pabpc1b
peak105294	46.681	2.5853	0.663551	3.89616	9.77282e-05	0.0161749	chr19	12242701	12243114	ywhaz
peak10651	138.082	1.83021	0.433416	4.22276	2.41331e-05	0.00557049	chr1	54608904	54609332	si:ch211-286b5.5
peak10651	138.082	1.83021	0.433416	4.22276	2.41331e-05	0.00557049	chr1	54608904	54609332	zgc:172106
peak106611	53.449	4.37892	0.729004	6.00672	1.89309e-09	2.05274e-06	chr19	19894407	19894942	sb:cb649
peak106611	53.449	4.37892	0.729004	6.00672	1.89309e-09	2.05274e-06	chr19	19894407	19894942	snx10a
peak10797	23.2476	4.49536	1.11171	4.04364	5.26281e-05	0.0101356	chr1	55664014	55664248	c3c
peak10797	23.2476	4.49536	1.11171	4.04364	5.26281e-05	0.0101356	chr1	55664014	55664248	gcgrb
peak10798	33.2941	4.77242	1.02393	4.66091	3.1482e-06	0.00110012	chr1	55664457	55664865	c3c
peak10798	33.2941	4.77242	1.02393	4.66091	3.1482e-06	0.00110012	chr1	55664457	55664865	gcgrb
peak10882	21.4925	4.15132	1.12289	3.69699	0.000218174	0.0301658	chr1	56631208	56631418	b3gntl1
peak109246	450.091	0.864686	0.220145	3.9278	8.57248e-05	0.014635	chr19	32382139	32382984	zbtb10
peak109246	450.091	0.864686	0.220145	3.9278	8.57248e-05	0.014635	chr19	32382139	32382984	zgc:103761
peak109254	192.625	1.25967	0.320106	3.93518	8.31358e-05	0.0143574	chr19	32411869	32412451	zbtb10
peak109254	192.625	1.25967	0.320106	3.93518	8.31358e-05	0.0143574	chr19	32411869	32412451	zgc:103761
peak109287	689.292	0.813207	0.187766	4.33096	1.48461e-05	0.00376763	chr19	32543056	32544012	zbtb10
peak109287	689.292	0.813207	0.187766	4.33096	1.48461e-05	0.00376763	chr19	32543056	32544012	zgc:103761
peak10950	39.7325	3.40144	0.876956	3.87869	0.000105019	0.0169581	chr1	57245880	57246117	si:dkey-1c7.3
peak10950	39.7325	3.40144	0.876956	3.87869	0.000105019	0.0169581	chr1	57245880	57246117	trim35-1
peak10959	87.6676	2.96576	0.628768	4.71677	2.39616e-06	0.000871358	chr1	57303714	57304207	trim35-1
peak109632	26.101	4.22043	1.03332	4.08433	4.42038e-05	0.00896681	chr19	33897427	33897778	runx1t1
peak109632	26.101	4.22043	1.03332	4.08433	4.42038e-05	0.00896681	chr19	33897427	33897778	triqk
peak10969	20.9707	5.50937	1.40416	3.92359	8.72382e-05	0.0148263	chr1	57357216	57357506	caspb
peak10969	20.9707	5.50937	1.40416	3.92359	8.72382e-05	0.0148263	chr1	57357216	57357506	caspbl
peak10981	22.3701	6.51426	1.57801	4.12815	3.65697e-05	0.00771565	chr1	57523364	57523601	si:dkey-222h21.8
peak110239	84.0709	4.80633	0.631721	7.60832	2.77683e-14	8.01317e-11	chr19	36218247	36218550	angpt2b
peak110274	19.8639	7.78251	1.73268	4.49159	7.06931e-06	0.0021045	chr19	36482633	36482897	angpt2b
peak110395	228.893	1.48328	0.29998	4.9446	7.6302e-07	0.00033791	chr19	37072771	37073551	angpt2b
peak110395	228.893	1.48328	0.29998	4.9446	7.6302e-07	0.00033791	chr19	37072771	37073551	cx30.9
peak110409	34.5136	2.76154	0.777886	3.55005	0.000385151	0.0453948	chr19	37144827	37145253	angpt2b
peak110409	34.5136	2.76154	0.777886	3.55005	0.000385151	0.0453948	chr19	37144827	37145253	cx30.9
peak110589	42.2208	4.8142	0.873301	5.51264	3.53485e-08	2.46085e-05	chr19	38088800	38089264	si:ch211-250g4.3
peak110589	42.2208	4.8142	0.873301	5.51264	3.53485e-08	2.46085e-05	chr19	38088800	38089264	thsd7a
peak110742	96.2462	3.22665	0.558583	5.77649	7.62747e-09	6.96259e-06	chr19	38751570	38751984	phf14
peak110742	96.2462	3.22665	0.558583	5.77649	7.62747e-09	6.96259e-06	chr19	38751570	38751984	smap2
peak110808	44.4262	4.2469	0.798234	5.32037	1.03554e-07	6.28048e-05	chr19	39080421	39080850	bai2
peak110808	44.4262	4.2469	0.798234	5.32037	1.03554e-07	6.28048e-05	chr19	39080421	39080850	col9a2
peak110811	116.949	1.75691	0.410651	4.27834	1.8829e-05	0.00452796	chr19	39089337	39089857	bai2
peak110811	116.949	1.75691	0.410651	4.27834	1.8829e-05	0.00452796	chr19	39089337	39089857	col9a2
peak110970	74.3934	3.83573	0.585879	6.54697	5.87177e-11	9.55043e-08	chr19	39821233	39821834	si:dkeyp-66g8.1
peak110970	74.3934	3.83573	0.585879	6.54697	5.87177e-11	9.55043e-08	chr19	39821233	39821834	wu:fb99g09
peak111101	70.6016	3.55163	0.82003	4.33109	1.4837e-05	0.00376763	chr19	40692432	40692812	cdk6
peak111101	70.6016	3.55163	0.82003	4.33109	1.4837e-05	0.00376763	chr19	40692432	40692812	fam133b
peak111121	101.395	1.6131	0.442949	3.64174	0.000270803	0.0353655	chr19	40766584	40767179	calcr
peak111121	101.395	1.6131	0.442949	3.64174	0.000270803	0.0353655	chr19	40766584	40767179	fam133b
peak111437	49.5094	3.13509	0.691497	4.53378	5.79378e-06	0.00178415	chr19	42185247	42185482	si:dkey-158b13.2
peak111437	49.5094	3.13509	0.691497	4.53378	5.79378e-06	0.00178415	chr19	42185247	42185482	tinagl1
peak111551	295.012	1.01494	0.265151	3.82778	0.000129306	0.0199782	chr19	42752410	42752922	anp32e
peak111551	295.012	1.01494	0.265151	3.82778	0.000129306	0.0199782	chr19	42752410	42752922	cart4
peak111754	37.7564	6.41804	1.2825	5.00434	5.60542e-07	0.000260492	chr19	43534328	43534635	eef1a1l1
peak111754	37.7564	6.41804	1.2825	5.00434	5.60542e-07	0.000260492	chr19	43534328	43534635	rpl11
peak111802	41.0259	2.63965	0.716334	3.68494	0.000228759	0.031267	chr19	43760294	43760527	yrk
peak111822	69.8248	2.70275	0.548636	4.9263	8.37995e-07	0.000366577	chr19	43863353	43863658	ahdc1
peak111822	69.8248	2.70275	0.548636	4.9263	8.37995e-07	0.000366577	chr19	43863353	43863658	wasf2
peak111986	120.496	1.79254	0.404649	4.42986	9.42951e-06	0.00264019	chr19	44567300	44567747	rad21b
peak112036	89.9119	5.83764	0.769316	7.58809	3.2465e-14	9.21982e-11	chr19	44908321	44908883	ptpro
peak112036	89.9119	5.83764	0.769316	7.58809	3.2465e-14	9.21982e-11	chr19	44908321	44908883	rad21b
peak112062	45.7143	2.80786	0.701785	4.00103	6.30664e-05	0.0116032	chr19	45043490	45043794	ptpro
peak112062	45.7143	2.80786	0.701785	4.00103	6.30664e-05	0.0116032	chr19	45043490	45043794	rad21b
peak112102	127.518	1.41483	0.391358	3.61518	0.00030014	0.0378966	chr19	45330828	45331365	ptpro
peak112102	127.518	1.41483	0.391358	3.61518	0.00030014	0.0378966	chr19	45330828	45331365	rad21b
peak112183	79.3777	3.41016	0.565499	6.03035	1.63601e-09	1.80683e-06	chr19	45762826	45763176	trps1
peak112183	79.3777	3.41016	0.565499	6.03035	1.63601e-09	1.80683e-06	chr19	45762826	45763176	zgc:92022
peak112274	300.827	1.84423	0.270074	6.82861	8.57402e-12	1.63194e-08	chr19	46086509	46087124	cap2
peak112274	300.827	1.84423	0.270074	6.82861	8.57402e-12	1.63194e-08	chr19	46086509	46087124	trps1
peak112315	135.852	1.46848	0.395069	3.71703	0.000201575	0.0283731	chr19	46295550	46296114	eif3hb
peak112315	135.852	1.46848	0.395069	3.71703	0.000201575	0.0283731	chr19	46295550	46296114	eif3hb
peak112334	40.1751	4.30594	0.830406	5.18535	2.15615e-07	0.000112798	chr19	46368605	46368841	eif3hb
peak112334	40.1751	4.30594	0.830406	5.18535	2.15615e-07	0.000112798	chr19	46368605	46368841	utp23
peak112395	39.8644	3.68834	0.780243	4.72717	2.27674e-06	0.000846866	chr19	46591547	46591849	cap2
peak112395	39.8644	3.68834	0.780243	4.72717	2.27674e-06	0.000846866	chr19	46591547	46591849	trps1
peak11265	24.6829	3.52758	0.961353	3.66939	0.000243127	0.0327877	chr10	21127	21374	smad4
peak11265	24.6829	3.52758	0.961353	3.66939	0.000243127	0.0327877	chr10	21127	21374	tiprl
peak112694	19.8105	3.93956	1.11937	3.51944	0.000432457	0.0495981	chr19	47707024	47707231	zgc:101684
peak112695	54.305	4.73271	0.762051	6.21049	5.28191e-10	6.8979e-07	chr19	47707411	47707702	zgc:101684
peak112736	184.503	1.47691	0.338651	4.36116	1.29372e-05	0.00333044	chr19	47839006	47839504	ext1c
peak112736	184.503	1.47691	0.338651	4.36116	1.29372e-05	0.00333044	chr19	47839006	47839504	psmb2
peak112769	60.5164	3.61624	0.681774	5.30416	1.13192e-07	6.70588e-05	chr19	47967764	47968375	scg5
peak11326	49.297	3.34848	0.678999	4.93149	8.16028e-07	0.000358721	chr10	197465	197764	ets2
peak11326	49.297	3.34848	0.678999	4.93149	8.16028e-07	0.000358721	chr10	197465	197764	psmg1
peak113295	41.7597	3.507	0.747949	4.68882	2.74783e-06	0.000989191	chr2	1243807	1244197	polr2d
peak113295	41.7597	3.507	0.747949	4.68882	2.74783e-06	0.000989191	chr2	1243807	1244197	si:ch211-241e1.2
peak11333	120.264	6.33836	0.716129	8.85087	8.6843e-19	5.17917e-15	chr10	210587	210882	mpzl1l
peak11333	120.264	6.33836	0.716129	8.85087	8.6843e-19	5.17917e-15	chr10	210587	210882	psmg1
peak113387	60.5637	4.96035	0.799797	6.20201	5.57473e-10	7.12571e-07	chr2	1783119	1783469	dspa
peak113387	60.5637	4.96035	0.799797	6.20201	5.57473e-10	7.12571e-07	chr2	1783119	1783469	zgc:171831
peak113388	66.0095	3.16582	0.627489	5.04522	4.52993e-07	0.000217869	chr2	1788166	1788518	dspa
peak113547	24.9304	6.67393	1.65357	4.03608	5.43528e-05	0.0104094	chr2	2621175	2621516	exosc4
peak113547	24.9304	6.67393	1.65357	4.03608	5.43528e-05	0.0104094	chr2	2621175	2621516	prkacbb
peak11356	101.469	2.86889	0.466792	6.14597	7.94741e-10	9.67287e-07	chr10	257742	258330	lrrc32
peak11356	101.469	2.86889	0.466792	6.14597	7.94741e-10	9.67287e-07	chr10	257742	258330	zgc:56039
peak11383	128.148	1.88905	0.393432	4.80146	1.57514e-06	0.000624869	chr10	352376	352977	akt2l
peak11383	128.148	1.88905	0.393432	4.80146	1.57514e-06	0.000624869	chr10	352376	352977	zgc:171929
peak113880	209.294	1.2718	0.312475	4.07007	4.69982e-05	0.00939776	chr2	4285774	4286267	gata6
peak114091	29.306	4.9009	1.06176	4.61584	3.91504e-06	0.00130439	chr2	5307521	5307824	phb2
peak114091	29.306	4.9009	1.06176	4.61584	3.91504e-06	0.00130439	chr2	5307521	5307824	tnk2b
peak114233	291.92	2.62359	0.285156	9.20057	3.56067e-20	2.47663e-16	chr2	6127610	6128133	scp2a
peak114278	180.238	2.53567	0.344397	7.36264	1.80311e-13	4.5437e-10	chr2	6369294	6369758	arl14
peak114278	180.238	2.53567	0.344397	7.36264	1.80311e-13	4.5437e-10	chr2	6369294	6369758	ppm1la
peak114282	26.1687	5.14762	1.16716	4.4104	1.03181e-05	0.00283139	chr2	6382475	6382700	ppm1la
peak114454	95.255	1.71325	0.45064	3.80182	0.000143638	0.0216687	chr2	7611295	7611755	ripk2
peak114454	95.255	1.71325	0.45064	3.80182	0.000143638	0.0216687	chr2	7611295	7611755	si:dkeyp-106c3.1
peak114490	35.2605	4.25736	0.885315	4.80886	1.51795e-06	0.000606215	chr2	7929226	7929678	b3gnt5b
peak114490	35.2605	4.25736	0.885315	4.80886	1.51795e-06	0.000606215	chr2	7929226	7929678	eif4a2
peak114527	137.291	2.11662	0.383547	5.51854	3.41821e-08	2.39831e-05	chr2	8129560	8130217	ephb3a
peak114527	137.291	2.11662	0.383547	5.51854	3.41821e-08	2.39831e-05	chr2	8129560	8130217	si:ch211-38m6.6
peak114541	181.922	2.76848	0.348818	7.93675	2.0755e-15	7.42678e-12	chr2	8207551	8208561	ephb3a
peak114541	181.922	2.76848	0.348818	7.93675	2.0755e-15	7.42678e-12	chr2	8207551	8208561	si:ch211-38m6.6
peak114893	57.6883	2.16371	0.598014	3.61815	0.000296717	0.0376238	chr2	10532620	10532990	gadd45aa
peak114893	57.6883	2.16371	0.598014	3.61815	0.000296717	0.0376238	chr2	10532620	10532990	gng12a
peak115116	109.362	2.18097	0.452774	4.8169	1.45807e-06	0.000588871	chr2	11774381	11774829	impad1
peak115116	109.362	2.18097	0.452774	4.8169	1.45807e-06	0.000588871	chr2	11774381	11774829	penka
peak116556	187.22	1.54679	0.379332	4.07765	4.54924e-05	0.00915553	chr2	21141594	21141907	prg4a
peak116556	187.22	1.54679	0.379332	4.07765	4.54924e-05	0.00915553	chr2	21141594	21141907	tpra
peak116560	56.6475	3.54196	0.64968	5.45185	4.98479e-08	3.32781e-05	chr2	21153343	21153792	prg4a
peak116560	56.6475	3.54196	0.64968	5.45185	4.98479e-08	3.32781e-05	chr2	21153343	21153792	tpra
peak116561	78.1281	4.75901	0.67138	7.0884	1.35667e-12	3.11191e-09	chr2	21153813	21154208	prg4a
peak116561	78.1281	4.75901	0.67138	7.0884	1.35667e-12	3.11191e-09	chr2	21153813	21154208	tpra
peak116565	177.465	2.70374	0.358659	7.53847	4.75527e-14	1.28907e-10	chr2	21169775	21170395	prg4a
peak116565	177.465	2.70374	0.358659	7.53847	4.75527e-14	1.28907e-10	chr2	21169775	21170395	tpra
peak116573	212.351	5.83153	0.483589	12.0588	1.74227e-33	1.55859e-28	chr2	21192298	21192862	c1orf27
peak116573	212.351	5.83153	0.483589	12.0588	1.74227e-33	1.55859e-28	chr2	21192298	21192862	tpra
peak116920	167.309	1.4128	0.342663	4.12299	3.73993e-05	0.00784444	chr2	22619289	22619870	crsp7
peak116920	167.309	1.4128	0.342663	4.12299	3.73993e-05	0.00784444	chr2	22619289	22619870	si:dkey-43b14.9
peak117858	203.436	1.23441	0.334413	3.69127	0.000223135	0.0306622	chr2	27122418	27123061	cdh7
peak117858	203.436	1.23441	0.334413	3.69127	0.000223135	0.0306622	chr2	27122418	27123061	si:dkey-181m9.8
peak11828	315.454	0.978958	0.261116	3.74913	0.00017745	0.0256146	chr10	2281628	2282357	nxnl2
peak11828	315.454	0.978958	0.261116	3.74913	0.00017745	0.0256146	chr10	2281628	2282357	si:ch211-122m3.1
peak118319	206.672	1.41027	0.31133	4.52982	5.90348e-06	0.0018086	chr2	29406293	29406958	cahz
peak118319	206.672	1.41027	0.31133	4.52982	5.90348e-06	0.0018086	chr2	29406293	29406958	cdh18
peak12006	116.014	2.87439	0.431559	6.66049	2.72912e-11	4.7406e-08	chr10	3480426	3481319	ptpn11a
peak12006	116.014	2.87439	0.431559	6.66049	2.72912e-11	4.7406e-08	chr10	3480426	3481319	zgc:123275
peak120216	33.7833	3.06231	0.800402	3.82597	0.000130259	0.0200907	chr2	37879665	37879990	mettl17
peak120216	33.7833	3.06231	0.800402	3.82597	0.000130259	0.0200907	chr2	37879665	37879990	si:ch211-284o19.8
peak120491	196.62	1.18476	0.31943	3.70899	0.000208088	0.0291088	chr2	39267658	39268162	clstn2
peak120491	196.62	1.18476	0.31943	3.70899	0.000208088	0.0291088	chr2	39267658	39268162	zgc:136870
peak12060	461.254	0.796677	0.220131	3.6191	0.000295632	0.0375206	chr10	3719016	3719677	pitpnb
peak12060	461.254	0.796677	0.220131	3.6191	0.000295632	0.0375206	chr10	3719016	3719677	zgc:123275
peak12074	87.3246	1.80443	0.472673	3.8175	0.000134809	0.0206325	chr10	3771120	3771815	pitpnb
peak12074	87.3246	1.80443	0.472673	3.8175	0.000134809	0.0206325	chr10	3771120	3771815	zgc:123275
peak12076	393.029	1.05827	0.245584	4.3092	1.63848e-05	0.00406587	chr10	3778939	3779446	pitpnb
peak12076	393.029	1.05827	0.245584	4.3092	1.63848e-05	0.00406587	chr10	3778939	3779446	zgc:123275
peak12077	97.7891	1.75576	0.452324	3.88163	0.000103757	0.0168149	chr10	3780852	3781343	pitpnb
peak12077	97.7891	1.75576	0.452324	3.88163	0.000103757	0.0168149	chr10	3780852	3781343	zgc:123275
peak12084	178.081	1.42801	0.341784	4.17811	2.93939e-05	0.00646866	chr10	3799634	3800310	pitpnb
peak12084	178.081	1.42801	0.341784	4.17811	2.93939e-05	0.00646866	chr10	3799634	3800310	zgc:123275
peak121063	119	1.72543	0.410011	4.20826	2.57345e-05	0.00584302	chr2	41743784	41744179	zgc:110158
peak121063	119	1.72543	0.410011	4.20826	2.57345e-05	0.00584302	chr2	41743784	41744179	znf622
peak121121	34.9983	3.84361	0.876067	4.38735	1.14742e-05	0.00305038	chr2	41958733	41958987	efr3a
peak121121	34.9983	3.84361	0.876067	4.38735	1.14742e-05	0.00305038	chr2	41958733	41958987	keap1a
peak121134	217.31	1.26021	0.304679	4.13617	3.53152e-05	0.00751299	chr2	42005332	42005953	efr3a
peak121134	217.31	1.26021	0.304679	4.13617	3.53152e-05	0.00751299	chr2	42005332	42005953	keap1a
peak121885	94.6907	1.86542	0.456587	4.08557	4.39692e-05	0.00892933	chr2	45206529	45207113	chrng
peak121885	94.6907	1.86542	0.456587	4.08557	4.39692e-05	0.00892933	chr2	45206529	45207113	si:dkey-76d14.1
peak122171	195.407	1.31708	0.321021	4.10277	4.08236e-05	0.00848312	chr2	46429941	46430461	gpc1b
peak122171	195.407	1.31708	0.321021	4.10277	4.08236e-05	0.00848312	chr2	46429941	46430461	itgb1b
peak122302	119.113	1.68826	0.404207	4.17672	2.95748e-05	0.00649249	chr2	46905908	46906714	si:ch211-226f6.1
peak122302	119.113	1.68826	0.404207	4.17672	2.95748e-05	0.00649249	chr2	46905908	46906714	si:ch211-234b19.1
peak122325	32.4492	2.96727	0.817813	3.62829	0.0002853	0.0365387	chr2	47003188	47003652	si:ch211-226f6.1
peak122325	32.4492	2.96727	0.817813	3.62829	0.0002853	0.0365387	chr2	47003188	47003652	si:ch211-234b19.1
peak122328	175.265	1.47357	0.35866	4.10856	3.98139e-05	0.00828658	chr2	47026228	47027052	si:ch211-226f6.1
peak122328	175.265	1.47357	0.35866	4.10856	3.98139e-05	0.00828658	chr2	47026228	47027052	si:ch211-234b19.1
peak122675	27.5636	3.51266	0.94596	3.71333	0.00020455	0.0286811	chr2	49035100	49035356	svilb
peak122675	27.5636	3.51266	0.94596	3.71333	0.00020455	0.0286811	chr2	49035100	49035356	zgc:123035
peak122778	823.475	0.663195	0.174376	3.80325	0.000142812	0.0215622	chr2	49534274	49535180	rorcb
peak122778	823.475	0.663195	0.174376	3.80325	0.000142812	0.0215622	chr2	49534274	49535180	si:ch211-168n16.1
peak123002	269.927	0.976419	0.274968	3.55103	0.000383734	0.0453173	chr2	50911751	50912216	neurod6b
peak123002	269.927	0.976419	0.274968	3.55103	0.000383734	0.0453173	chr2	50911751	50912216	scn12aa
peak123008	94.0507	2.11007	0.482689	4.37149	1.23401e-05	0.00319604	chr2	50962363	50962708	neurod6b
peak123008	94.0507	2.11007	0.482689	4.37149	1.23401e-05	0.00319604	chr2	50962363	50962708	scn12aa
peak123020	71.5903	4.28481	0.632989	6.76918	1.29517e-11	2.38893e-08	chr2	51041821	51042145	neurod6b
peak123020	71.5903	4.28481	0.632989	6.76918	1.29517e-11	2.38893e-08	chr2	51041821	51042145	scn12aa
peak123103	287.522	1.33114	0.307937	4.32277	1.54079e-05	0.00388411	chr2	51648748	51649068	dad1
peak123103	287.522	1.33114	0.307937	4.32277	1.54079e-05	0.00388411	chr2	51648748	51649068	lrrc24
peak123164	414.567	1.42002	0.271042	5.23912	1.61344e-07	8.80683e-05	chr2	52148494	52149150	si:ch211-9d9.1
peak123184	1000.95	0.583504	0.163405	3.57091	0.000355749	0.0431226	chr2	52233920	52234697	NA
peak123595	607.225	0.93432	0.195773	4.77247	1.8198e-06	0.000707803	chr2	54738785	54739479	ndufv2
peak123595	607.225	0.93432	0.195773	4.77247	1.8198e-06	0.000707803	chr2	54738785	54739479	rab12
peak123696	131.207	2.85659	0.530318	5.38657	7.18156e-08	4.6219e-05	chr2	55281449	55282035	calrl
peak123696	131.207	2.85659	0.530318	5.38657	7.18156e-08	4.6219e-05	chr2	55281449	55282035	rnf126
peak123737	17.4795	5.33972	1.47025	3.63184	0.000281411	0.0362438	chr2	55586135	55586380	tpm4b
peak123770	493.224	0.780915	0.213785	3.6528	0.000259399	0.0343272	chr2	55737360	55737927	rx2
peak124032	24.2476	6.63952	1.62572	4.08406	4.42561e-05	0.00896725	chr2	57261114	57261348	map2k2b
peak124032	24.2476	6.63952	1.62572	4.08406	4.42561e-05	0.00896725	chr2	57261114	57261348	tcf3a
peak124245	13.7878	7.25538	1.84624	3.92981	8.5013e-05	0.0145655	chr2	58387456	58387739	epb41l3b
peak124245	13.7878	7.25538	1.84624	3.92981	8.5013e-05	0.0145655	chr2	58387456	58387739	vapal
peak124326	46.7242	2.62757	0.661007	3.9751	7.03499e-05	0.0126626	chr2	58734093	58734490	fem1a
peak124326	46.7242	2.62757	0.661007	3.9751	7.03499e-05	0.0126626	chr2	58734093	58734490	zgc:112425
peak124421	178.477	2.54034	0.387333	6.55855	5.43341e-11	8.91852e-08	chr2	59050274	59050634	ftr65
peak124434	74.7692	2.00738	0.512282	3.91851	8.90978e-05	0.0150386	chr2	59188119	59188389	ftr34
peak12449	37.2299	7.16664	1.51631	4.72636	2.28578e-06	0.000848465	chr10	5517622	5518085	auh
peak12449	37.2299	7.16664	1.51631	4.72636	2.28578e-06	0.000848465	chr10	5517622	5518085	syk
peak124667	116.897	1.88898	0.43738	4.31886	1.56839e-05	0.00393561	chr20	581465	581794	smyd2b
peak12500	28.9312	4.6713	1.0686	4.37143	1.23437e-05	0.00319604	chr10	5857819	5858042	si:ch211-281k19.2
peak125081	195.187	1.20791	0.318308	3.79477	0.000147782	0.0220921	chr20	2625546	2625964	bub1
peak125081	195.187	1.20791	0.318308	3.79477	0.000147782	0.0220921	chr20	2625546	2625964	zgc:101562
peak125125	28.6116	4.23201	0.974892	4.34101	1.41831e-05	0.00361994	chr20	2773928	2774209	cdk19
peak125125	28.6116	4.23201	0.974892	4.34101	1.41831e-05	0.00361994	chr20	2773928	2774209	syncrip
peak12549	50.0837	2.8002	0.652799	4.28953	1.79053e-05	0.00434671	chr10	6047792	6048027	hmgcs1
peak12549	50.0837	2.8002	0.652799	4.28953	1.79053e-05	0.00434671	chr10	6047792	6048027	tln1
peak12584	221.126	1.17598	0.30218	3.89167	9.95584e-05	0.0164019	chr10	6326269	6327205	tpm2
peak12584	221.126	1.17598	0.30218	3.89167	9.95584e-05	0.0164019	chr10	6326269	6327205	zgc:114200
peak126047	433.78	0.863683	0.231131	3.73677	0.0001864	0.026619	chr20	8018304	8018875	ppap2b
peak126047	433.78	0.863683	0.231131	3.73677	0.0001864	0.026619	chr20	8018304	8018875	si:ch211-257m21.2
peak126143	107.02	1.90783	0.490775	3.88739	0.00010133	0.0165109	chr20	8429054	8429475	mysm1
peak126143	107.02	1.90783	0.490775	3.88739	0.00010133	0.0165109	chr20	8429054	8429475	prkaa2
peak126253	76.7767	2.82583	0.529652	5.33525	9.54108e-08	5.90672e-05	chr20	9223242	9223628	si:ch211-59d15.4
peak126393	181.111	2.22825	0.342894	6.49836	8.12024e-11	1.27441e-07	chr20	9992722	9993251	zgc:86709
peak126470	156.205	2.16693	0.37848	5.72534	1.03229e-08	8.75645e-06	chr20	10504177	10504490	glrx5
peak126475	124.291	1.62034	0.397661	4.07467	4.60796e-05	0.0092633	chr20	10565359	10565951	serpina1
peak126524	89.1178	2.91116	0.494911	5.88219	4.0487e-09	3.93681e-06	chr20	11058592	11059058	serpina1
peak126618	151.562	1.37533	0.370026	3.71685	0.000201719	0.0283731	chr20	11831831	11832510	NA
peak126700	111.703	5.74672	0.670024	8.57688	9.74793e-18	4.58961e-14	chr20	13031501	13031836	ints7
peak126765	119.1	2.52143	0.440056	5.7298	1.00548e-08	8.73033e-06	chr20	13660679	13661179	ezrb
peak126765	119.1	2.52143	0.440056	5.7298	1.00548e-08	8.73033e-06	chr20	13660679	13661179	sytl3
peak126794	17.5066	7.60074	1.76811	4.2988	1.71723e-05	0.00419569	chr20	13785856	13786145	ezrb
peak126794	17.5066	7.60074	1.76811	4.2988	1.71723e-05	0.00419569	chr20	13785856	13786145	si:ch211-122h15.4
peak126813	54.1994	2.93917	0.639749	4.59426	4.34285e-06	0.00141273	chr20	13889904	13890221	lpgat1
peak126813	54.1994	2.93917	0.639749	4.59426	4.34285e-06	0.00141273	chr20	13889904	13890221	nek2
peak126816	55.1202	2.35803	0.614956	3.83447	0.000125837	0.0195097	chr20	13909642	13910019	lpgat1
peak126816	55.1202	2.35803	0.614956	3.83447	0.000125837	0.0195097	chr20	13909642	13910019	nek2
peak126846	183.896	1.4035	0.328874	4.26759	1.97599e-05	0.0047138	chr20	14116711	14117316	si:ch211-22i13.2
peak126888	41.6951	5.04774	0.912428	5.53221	3.16228e-08	2.23628e-05	chr20	14457459	14457749	grcc10
peak126888	41.6951	5.04774	0.912428	5.53221	3.16228e-08	2.23628e-05	chr20	14457459	14457749	si:ch211-223m11.1
peak127298	102.168	1.95728	0.453492	4.31601	1.58872e-05	0.00397547	chr20	16743598	16743887	kcnk13b
peak127298	102.168	1.95728	0.453492	4.31601	1.58872e-05	0.00397547	chr20	16743598	16743887	tmem30ab
peak127300	35.485	6.32501	1.29634	4.87914	1.0655e-06	0.000452811	chr20	16744836	16745145	kcnk13b
peak127300	35.485	6.32501	1.29634	4.87914	1.0655e-06	0.000452811	chr20	16744836	16745145	tmem30ab
peak127450	36.5475	2.60586	0.74098	3.51677	0.000436828	0.0499713	chr20	17715149	17715442	cdh2
peak127450	36.5475	2.60586	0.74098	3.51677	0.000436828	0.0499713	chr20	17715149	17715442	si:ch73-74h11.1
peak127476	65.357	3.48549	0.599509	5.81391	6.10291e-09	5.77726e-06	chr20	17823838	17824274	cdh2
peak127476	65.357	3.48549	0.599509	5.81391	6.10291e-09	5.77726e-06	chr20	17823838	17824274	si:ch73-74h11.1
peak127732	113.865	2.75358	0.433329	6.35449	2.09122e-10	3.01735e-07	chr20	18886291	18886684	ccm2
peak127732	113.865	2.75358	0.433329	6.35449	2.09122e-10	3.01735e-07	chr20	18886291	18886684	fam167ab
peak127815	54.2686	4.00387	0.688127	5.81851	5.9374e-09	5.65048e-06	chr20	19285936	19286175	blk
peak127815	54.2686	4.00387	0.688127	5.81851	5.9374e-09	5.65048e-06	chr20	19285936	19286175	si:ch211-278j3.3
peak127831	30.5344	3.8006	0.916881	4.14514	3.39612e-05	0.00725946	chr20	19375051	19375337	blk
peak127831	30.5344	3.8006	0.916881	4.14514	3.39612e-05	0.00725946	chr20	19375051	19375337	si:ch211-278j3.3
peak127941	26.8625	4.39495	1.021	4.30456	1.67322e-05	0.00412347	chr20	20116472	20116769	kcnh5a
peak127941	26.8625	4.39495	1.021	4.30456	1.67322e-05	0.00412347	chr20	20116472	20116769	ptk2bb
peak128106	55.3184	2.15655	0.600815	3.58937	0.000331484	0.0409582	chr20	20737757	20737992	rtn1b
peak128254	47.0847	2.62995	0.695106	3.78353	0.000154619	0.0229574	chr20	21305971	21306290	nudt14
peak128254	47.0847	2.62995	0.695106	3.78353	0.000154619	0.0229574	chr20	21305971	21306290	si:dkey-219e20.2
peak128459	130.243	1.37435	0.387504	3.54668	0.000390122	0.0458041	chr20	22039645	22040036	daam1b
peak128459	130.243	1.37435	0.387504	3.54668	0.000390122	0.0458041	chr20	22039645	22040036	nmu
peak128939	27.5268	3.93439	0.999953	3.93458	8.33421e-05	0.0143791	chr20	23954145	23954384	ginm1
peak129011	44.5256	2.94683	0.68912	4.27622	1.90092e-05	0.00456514	chr20	24221702	24221948	bach2b
peak129011	44.5256	2.94683	0.68912	4.27622	1.90092e-05	0.00456514	chr20	24221702	24221948	map3k7
peak129151	325.367	1.57062	0.265692	5.91143	3.39158e-09	3.42827e-06	chr20	24994564	24995223	epha7
peak129151	325.367	1.57062	0.265692	5.91143	3.39158e-09	3.42827e-06	chr20	24994564	24995223	pdgfra
peak129296	80.3352	1.99148	0.502233	3.96526	7.33167e-05	0.0130392	chr20	25470590	25470984	ctgfa
peak129296	80.3352	1.99148	0.502233	3.96526	7.33167e-05	0.0130392	chr20	25470590	25470984	itsn2a
peak129325	45.1301	3.1195	0.693434	4.49863	6.83925e-06	0.00205309	chr20	25605391	25605686	cyp2n13
peak129325	45.1301	3.1195	0.693434	4.49863	6.83925e-06	0.00205309	chr20	25605391	25605686	si:dkey-183n20.15
peak129549	19.0931	7.72615	1.74336	4.43175	9.34693e-06	0.00262528	chr20	26689524	26689786	foxq1b
peak129549	19.0931	7.72615	1.74336	4.43175	9.34693e-06	0.00262528	chr20	26689524	26689786	irf4b
peak130360	105.8	1.72401	0.42918	4.01699	5.89454e-05	0.0110432	chr20	29928795	29929415	id2b
peak130360	105.8	1.72401	0.42918	4.01699	5.89454e-05	0.0110432	chr20	29928795	29929415	rnf144ab
peak130629	19.4858	4.23905	1.16823	3.62862	0.000284938	0.0365387	chr20	30879593	30879786	acbd3
peak130629	19.4858	4.23905	1.16823	3.62862	0.000284938	0.0365387	chr20	30879593	30879786	nhsl1b
peak130630	61.3259	7.81347	1.38866	5.62664	1.83756e-08	1.39308e-05	chr20	30884565	30884921	acbd3
peak130630	61.3259	7.81347	1.38866	5.62664	1.83756e-08	1.39308e-05	chr20	30884565	30884921	nhsl1b
peak130651	45.5025	2.4056	0.671138	3.58437	0.000337895	0.0415495	chr20	30936084	30936349	hebp2
peak130651	45.5025	2.4056	0.671138	3.58437	0.000337895	0.0415495	chr20	30936084	30936349	nhsl1b
peak130840	67.178	2.68227	0.572813	4.68263	2.83217e-06	0.00101343	chr20	31782269	31782642	stxbp5a
peak130840	67.178	2.68227	0.572813	4.68263	2.83217e-06	0.00101343	chr20	31782269	31782642	ust
peak131283	68.8657	2.22729	0.573235	3.88547	0.000102132	0.0165665	chr20	33606103	33606507	erh
peak131283	68.8657	2.22729	0.573235	3.88547	0.000102132	0.0165665	chr20	33606103	33606507	paplnb
peak131923	253.839	1.10327	0.283748	3.88822	0.000100983	0.0165109	chr20	36617647	36618358	enah
peak131923	253.839	1.10327	0.283748	3.88822	0.000100983	0.0165109	chr20	36617647	36618358	lbr
peak132114	122.917	1.50472	0.396271	3.79719	0.000146344	0.0219473	chr20	37526450	37526950	gpr126
peak132114	122.917	1.50472	0.396271	3.79719	0.000146344	0.0219473	chr20	37526450	37526950	si:ch211-202p1.5
peak132516	21.1892	3.96854	1.10123	3.60373	0.000313682	0.0393014	chr20	39436063	39436354	ccdc25
peak132516	21.1892	3.96854	1.10123	3.60373	0.000313682	0.0393014	chr20	39436063	39436354	si:dkey-217m5.3
peak132640	467.295	0.866609	0.223332	3.88037	0.000104299	0.0168875	chr20	40056200	40056994	rnf217
peak132640	467.295	0.866609	0.223332	3.88037	0.000104299	0.0168875	chr20	40056200	40056994	trdn
peak132767	124.559	1.89458	0.40146	4.71922	2.36745e-06	0.000866111	chr20	40728680	40729276	cx43
peak132767	124.559	1.89458	0.40146	4.71922	2.36745e-06	0.000866111	chr20	40728680	40729276	hsf2
peak132934	22.2165	3.84025	1.05458	3.64149	0.000271061	0.0353733	chr20	41911660	41911874	mcm9
peak132934	22.2165	3.84025	1.05458	3.64149	0.000271061	0.0353733	chr20	41911660	41911874	slc35f1
peak132935	51.566	5.10636	0.831289	6.1427	8.11289e-10	9.80755e-07	chr20	41912631	41912939	mcm9
peak132935	51.566	5.10636	0.831289	6.1427	8.11289e-10	9.80755e-07	chr20	41912631	41912939	slc35f1
peak133000	345.181	0.959565	0.248419	3.86269	0.000112145	0.0178828	chr20	42235398	42236165	mcm9
peak133000	345.181	0.959565	0.248419	3.86269	0.000112145	0.0178828	chr20	42235398	42236165	slc35f1
peak133156	56.6156	2.40466	0.594136	4.04733	5.18062e-05	0.0100204	chr20	43101287	43101674	pomcb
peak133156	56.6156	2.40466	0.594136	4.04733	5.18062e-05	0.0100204	chr20	43101287	43101674	snx9b
peak133227	157.165	1.28128	0.354465	3.61468	0.000300721	0.0379165	chr20	43402256	43402790	mllt4
peak133227	157.165	1.28128	0.354465	3.61468	0.000300721	0.0379165	chr20	43402256	43402790	si:dkeyp-95d10.1
peak133525	290.219	1.19116	0.286313	4.16034	3.17772e-05	0.00686644	chr20	45023375	45024013	atad2b
peak133525	290.219	1.19116	0.286313	4.16034	3.17772e-05	0.00686644	chr20	45023375	45024013	trib2
peak133528	300.529	0.946044	0.262714	3.60104	0.000316947	0.0395719	chr20	45034899	45035430	atad2b
peak133528	300.529	0.946044	0.262714	3.60104	0.000316947	0.0395719	chr20	45034899	45035430	trib2
peak133813	114.425	2.26689	0.434126	5.22173	1.77263e-07	9.55269e-05	chr20	46764378	46764763	adcy3b
peak133813	114.425	2.26689	0.434126	5.22173	1.77263e-07	9.55269e-05	chr20	46764378	46764763	wdr26b
peak133841	91.4854	8.50148	1.41481	6.00891	1.86777e-09	2.041e-06	chr20	46970604	46970955	esrrgb
peak133841	91.4854	8.50148	1.41481	6.00891	1.86777e-09	2.041e-06	chr20	46970604	46970955	si:ch73-21k16.5
peak134082	87.1575	2.13963	0.479101	4.46593	7.97213e-06	0.00233825	chr20	48187243	48187795	ipo13
peak134082	87.1575	2.13963	0.479101	4.46593	7.97213e-06	0.00233825	chr20	48187243	48187795	tfap2b
peak134206	325.626	2.34705	0.272141	8.62439	6.44327e-18	3.20222e-14	chr20	48779099	48779688	mgst3
peak134206	325.626	2.34705	0.272141	8.62439	6.44327e-18	3.20222e-14	chr20	48779099	48779688	pax1b
peak134273	526.481	0.863717	0.207326	4.16599	3.10006e-05	0.00673933	chr20	49103179	49103835	insm1a
peak134273	526.481	0.863717	0.207326	4.16599	3.10006e-05	0.00673933	chr20	49103179	49103835	xrn2
peak134288	578.942	0.813567	0.199007	4.08814	4.34849e-05	0.00885107	chr20	49147330	49148017	insm1a
peak134288	578.942	0.813567	0.199007	4.08814	4.34849e-05	0.00885107	chr20	49147330	49148017	xrn2
peak134293	349.059	1.06724	0.248316	4.29791	1.72417e-05	0.00420272	chr20	49168088	49169144	insm1a
peak134293	349.059	1.06724	0.248316	4.29791	1.72417e-05	0.00420272	chr20	49168088	49169144	xrn2
peak134663	338.182	0.958308	0.250408	3.82699	0.000129718	0.0200246	chr20	51777764	51778467	brox
peak134663	338.182	0.958308	0.250408	3.82699	0.000129718	0.0200246	chr20	51777764	51778467	disp1
peak134664	262.788	1.07866	0.288344	3.74087	0.000183381	0.0263108	chr20	51787122	51787584	brox
peak134664	262.788	1.07866	0.288344	3.74087	0.000183381	0.0263108	chr20	51787122	51787584	disp1
peak134805	208.79	1.27382	0.310016	4.1089	3.97549e-05	0.00828658	chr20	52607300	52607793	arhgap39
peak134805	208.79	1.27382	0.310016	4.1089	3.97549e-05	0.00828658	chr20	52607300	52607793	tsta3
peak13679	48.432	2.81124	0.656115	4.28468	1.83002e-05	0.00442457	chr10	12648393	12648850	lpar1
peak13679	48.432	2.81124	0.656115	4.28468	1.83002e-05	0.00442457	chr10	12648393	12648850	musk
peak136833	236.017	1.22614	0.293114	4.18315	2.87493e-05	0.00636593	chr21	7064769	7065267	crhbp
peak136833	236.017	1.22614	0.293114	4.18315	2.87493e-05	0.00636593	chr21	7064769	7065267	olfm1b
peak137518	257.118	1.13583	0.283543	4.00585	6.17952e-05	0.0114334	chr21	10932591	10933093	alpk2
peak137518	257.118	1.13583	0.283543	4.00585	6.17952e-05	0.0114334	chr21	10932591	10933093	nedd4l
peak137931	256.225	1.22707	0.296513	4.13834	3.49827e-05	0.00745111	chr21	13053747	13054125	spna2
peak138544	199.709	1.31958	0.316697	4.16669	3.09053e-05	0.00673933	chr21	16156697	16157390	tnfrsfa
peak138544	199.709	1.31958	0.316697	4.16669	3.09053e-05	0.00673933	chr21	16156697	16157390	unc5da
peak138708	142.697	1.9449	0.378254	5.14178	2.72149e-07	0.000137159	chr21	17202500	17203087	bcr
peak138708	142.697	1.9449	0.378254	5.14178	2.72149e-07	0.000137159	chr21	17202500	17203087	gfi1b
peak138887	137.597	1.49705	0.376885	3.97218	7.12182e-05	0.0127804	chr21	17820803	17821376	rxraa
peak138887	137.597	1.49705	0.376885	3.97218	7.12182e-05	0.0127804	chr21	17820803	17821376	stx2a
peak138951	76.9263	1.90151	0.505928	3.75846	0.000170964	0.0249291	chr21	18043500	18044000	si:dkeyp-116h7.3
peak138951	76.9263	1.90151	0.505928	3.75846	0.000170964	0.0249291	chr21	18043500	18044000	zgc:158666
peak139030	127.473	2.49498	0.438076	5.69531	1.23146e-08	9.88014e-06	chr21	18276318	18276884	si:dkeyp-116h7.3
peak139030	127.473	2.49498	0.438076	5.69531	1.23146e-08	9.88014e-06	chr21	18276318	18276884	smpd4
peak139183	190.919	1.43113	0.343168	4.17034	3.04151e-05	0.00665246	chr21	19009195	19009627	nefma
peak139183	190.919	1.43113	0.343168	4.17034	3.04151e-05	0.00665246	chr21	19009195	19009627	rpl17
peak139186	122.452	2.63512	0.418854	6.29128	3.14866e-10	4.40112e-07	chr21	19014961	19015506	nefma
peak139186	122.452	2.63512	0.418854	6.29128	3.14866e-10	4.40112e-07	chr21	19014961	19015506	rpl17
peak139482	314.399	1.2911	0.275753	4.68207	2.83993e-06	0.00101418	chr21	20295795	20296244	slc26a1
peak139606	809.48	0.654376	0.175799	3.7223	0.000197419	0.0279035	chr21	20667073	20667945	efna5a
peak139606	809.48	0.654376	0.175799	3.7223	0.000197419	0.0279035	chr21	20667073	20667945	zgc:85869
peak139832	113.846	1.61167	0.417795	3.85755	0.000114529	0.018127	chr21	21661704	21662103	or125-2
peak139917	170.219	2.36373	0.357839	6.60557	3.96003e-11	6.62158e-08	chr21	22121958	22122365	capn5b
peak139932	122.538	1.46985	0.398033	3.69279	0.000221809	0.030574	chr21	22237058	22237471	myo7ab
peak139932	122.538	1.46985	0.398033	3.69279	0.000221809	0.030574	chr21	22237058	22237471	si:dkey-163i6.6
peak139956	155.987	1.73561	0.359124	4.8329	1.34557e-06	0.000550898	chr21	22325634	22325969	lmbrd2b
peak139956	155.987	1.73561	0.359124	4.8329	1.34557e-06	0.000550898	chr21	22325634	22325969	nadk2
peak139961	258.669	1.20781	0.313068	3.85797	0.000114331	0.018127	chr21	22338305	22338674	lmbrd2b
peak139961	258.669	1.20781	0.313068	3.85797	0.000114331	0.018127	chr21	22338305	22338674	nadk2
peak140176	109.816	1.57392	0.443041	3.55254	0.000381533	0.0451233	chr21	23306927	23307451	ncam1a
peak140176	109.816	1.57392	0.443041	3.55254	0.000381533	0.0451233	chr21	23306927	23307451	zbtb16a
peak140247	689.408	0.765052	0.187052	4.09006	4.31266e-05	0.00879818	chr21	23537055	23537652	ncam1a
peak140247	689.408	0.765052	0.187052	4.09006	4.31266e-05	0.00879818	chr21	23537055	23537652	zbtb16a
peak140276	155.76	1.50291	0.361417	4.15837	3.20521e-05	0.00690915	chr21	23638314	23639002	ncam1a
peak140276	155.76	1.50291	0.361417	4.15837	3.20521e-05	0.00690915	chr21	23638314	23639002	zbtb16a
peak140377	275.956	1.13604	0.294896	3.85234	0.000116995	0.0184261	chr21	24087136	24087549	cadm1a
peak140377	275.956	1.13604	0.294896	3.85234	0.000116995	0.0184261	chr21	24087136	24087549	sc5d
peak140514	182.225	1.38211	0.350708	3.94091	8.11721e-05	0.0140726	chr21	24606462	24606995	im:7150060
peak140514	182.225	1.38211	0.350708	3.94091	8.11721e-05	0.0140726	chr21	24606462	24606995	jam3b
peak140527	75.787	2.03444	0.50804	4.0045	6.21499e-05	0.0114753	chr21	24633916	24634191	im:7150060
peak140527	75.787	2.03444	0.50804	4.0045	6.21499e-05	0.0114753	chr21	24633916	24634191	jam3b
peak14078	80.8511	2.21375	0.531772	4.16296	3.14146e-05	0.0067963	chr10	15151966	15152343	si:ch211-95j8.2
peak14078	80.8511	2.21375	0.531772	4.16296	3.14146e-05	0.0067963	chr10	15151966	15152343	spp1
peak141356	147.421	1.74738	0.366549	4.76713	1.86871e-06	0.000725252	chr21	28812092	28812609	cxxc5a
peak141356	147.421	1.74738	0.366549	4.76713	1.86871e-06	0.000725252	chr21	28812092	28812609	zgc:100829
peak141357	241.372	1.27223	0.290365	4.38147	1.17883e-05	0.00310161	chr21	28822970	28823792	cxxc5a
peak141357	241.372	1.27223	0.290365	4.38147	1.17883e-05	0.00310161	chr21	28822970	28823792	zgc:100829
peak141451	44.8721	5.14839	0.900284	5.71863	1.07387e-08	8.97814e-06	chr21	29544531	29544836	zgc:171310
peak141787	25.615	4.4876	1.11796	4.0141	5.9674e-05	0.0111446	chr21	31633333	31633650	si:ch211-12m10.1
peak141787	25.615	4.4876	1.11796	4.0141	5.9674e-05	0.0111446	chr21	31633333	31633650	si:ch211-166i24.1
peak141795	248.204	1.37436	0.286292	4.80055	1.58229e-06	0.000626317	chr21	31671547	31672007	si:ch211-12m10.1
peak141795	248.204	1.37436	0.286292	4.80055	1.58229e-06	0.000626317	chr21	31671547	31672007	si:ch211-166i24.1
peak141828	78.9364	5.61026	1.22598	4.57616	4.73595e-06	0.00152673	chr21	31826377	31826801	mat2b
peak141828	78.9364	5.61026	1.22598	4.57616	4.73595e-06	0.00152673	chr21	31826377	31826801	si:ch211-12m10.1
peak141966	149.288	1.29244	0.364925	3.54165	0.000397639	0.0463476	chr21	32402839	32403220	gfpt2
peak14220	29.7487	3.73833	0.916531	4.07878	4.52724e-05	0.00912153	chr10	16002000	16002262	aldh7a1
peak14220	29.7487	3.73833	0.916531	4.07878	4.52724e-05	0.00912153	chr10	16002000	16002262	pip5k1ba
peak142239	494.305	0.970813	0.212207	4.57484	4.76591e-06	0.00153362	chr21	33932267	33932819	ebf1b
peak142239	494.305	0.970813	0.212207	4.57484	4.76591e-06	0.00153362	chr21	33932267	33932819	rps14
peak143222	73.2506	2.16205	0.582793	3.7098	0.00020742	0.029038	chr21	39253124	39253671	si:ch211-274p24.2
peak143222	73.2506	2.16205	0.582793	3.7098	0.00020742	0.029038	chr21	39253124	39253671	si:ch211-274p24.3
peak143280	99.5353	2.53854	0.559603	4.53632	5.72435e-06	0.00176887	chr21	39611109	39611606	aldocb
peak143280	99.5353	2.53854	0.559603	4.53632	5.72435e-06	0.00176887	chr21	39611109	39611606	pigs
peak143338	124.309	1.79475	0.469195	3.82518	0.000130679	0.0201105	chr21	39956329	39956702	slc47a1
peak143338	124.309	1.79475	0.469195	3.82518	0.000130679	0.0201105	chr21	39956329	39956702	slc47a2
peak143345	56.5924	3.10689	0.620777	5.00483	5.59105e-07	0.000260492	chr21	40004667	40005211	med31
peak143345	56.5924	3.10689	0.620777	5.00483	5.59105e-07	0.000260492	chr21	40004667	40005211	slc47a2
peak143400	43.4358	4.80044	0.876845	5.47467	4.38327e-08	2.95937e-05	chr21	40324524	40324809	nup98
peak143400	43.4358	4.80044	0.876845	5.47467	4.38327e-08	2.95937e-05	chr21	40324524	40324809	or101-1
peak143473	157.182	1.33035	0.367086	3.62407	0.000290004	0.0370614	chr21	40643533	40644160	pcyt1bb
peak144163	74.1134	2.76021	0.530923	5.19889	2.00485e-07	0.000106124	chr21	44701952	44702221	ammecr1
peak144163	74.1134	2.76021	0.530923	5.19889	2.00485e-07	0.000106124	chr21	44701952	44702221	spry4
peak144724	50.1734	2.37942	0.62867	3.78485	0.000153801	0.022855	chr22	1025882	1026202	camk1ga
peak144724	50.1734	2.37942	0.62867	3.78485	0.000153801	0.022855	chr22	1025882	1026202	pparda
peak14496	70.0948	2.1031	0.527798	3.98466	6.7578e-05	0.0122305	chr10	17437878	17438424	nt5c2l1
peak14496	70.0948	2.1031	0.527798	3.98466	6.7578e-05	0.0122305	chr10	17437878	17438424	sppl3
peak144987	22.0113	5.61354	1.39565	4.02217	5.76646e-05	0.0108486	chr22	2663722	2663983	zgc:194221
peak145316	58.1117	3.36533	0.623648	5.3962	6.80656e-08	4.41231e-05	chr22	4311475	4311878	cers4a
peak145316	58.1117	3.36533	0.623648	5.3962	6.80656e-08	4.41231e-05	chr22	4311475	4311878	uhrf1
peak145358	46.1121	2.54876	0.678371	3.75717	0.000171845	0.0250308	chr22	4461361	4461642	unm_pku300
peak145358	46.1121	2.54876	0.678371	3.75717	0.000171845	0.0250308	chr22	4461361	4461642	zgc:195170
peak145359	96.9946	1.81248	0.469746	3.85843	0.000114116	0.018127	chr22	4477450	4477807	unm_pku300
peak145359	96.9946	1.81248	0.469746	3.85843	0.000114116	0.018127	chr22	4477450	4477807	zgc:195170
peak145382	269.791	1.06132	0.27946	3.79776	0.000146011	0.0219158	chr22	4619800	4620279	cherp
peak145382	269.791	1.06132	0.27946	3.79776	0.000146011	0.0219158	chr22	4619800	4620279	rx1
peak14543	23.1208	5.52672	1.33198	4.14926	3.33545e-05	0.00715542	chr10	17570933	17571358	ska1
peak14543	23.1208	5.52672	1.33198	4.14926	3.33545e-05	0.00715542	chr10	17570933	17571358	slc2a11l
peak145589	127.01	1.60505	0.409979	3.91496	9.04194e-05	0.0152043	chr22	5591020	5591530	si:zfos-588f8.1
peak145589	127.01	1.60505	0.409979	3.91496	9.04194e-05	0.0152043	chr22	5591020	5591530	zgc:171601
peak145689	266.272	1.28134	0.293367	4.36769	1.25568e-05	0.00324184	chr22	6052409	6052983	si:dkey-19a16.2
peak145713	39.8046	3.07852	0.847436	3.63275	0.000280418	0.0361463	chr22	6230619	6230878	rnasel2
peak145713	39.8046	3.07852	0.847436	3.63275	0.000280418	0.0361463	chr22	6230619	6230878	rnasel4
peak145715	22.9512	4.34484	1.16062	3.74355	0.000181437	0.0260947	chr22	6232835	6233082	rnasel2
peak145715	22.9512	4.34484	1.16062	3.74355	0.000181437	0.0260947	chr22	6232835	6233082	rnasel4
peak145730	31.6071	3.65771	1.0191	3.58915	0.000331757	0.0409636	chr22	6329901	6330161	rnasel2
peak145730	31.6071	3.65771	1.0191	3.58915	0.000331757	0.0409636	chr22	6329901	6330161	zgc:113298
peak14611	223.148	1.27948	0.300053	4.26417	2.00646e-05	0.00478009	chr10	17831391	17831897	si:ch211-269m17.1
peak14611	223.148	1.27948	0.300053	4.26417	2.00646e-05	0.00478009	chr10	17831391	17831897	si:dkey-200l5.2
peak14671	102.12	2.27487	0.445164	5.11019	3.21832e-07	0.000159503	chr10	18173129	18173786	ppp2r2a
peak14671	102.12	2.27487	0.445164	5.11019	3.21832e-07	0.000159503	chr10	18173129	18173786	prkab1a
peak148257	1064.7	0.588275	0.164875	3.56801	0.000359706	0.0435431	chr22	19115660	19116802	fgf22
peak148257	1064.7	0.588275	0.164875	3.56801	0.000359706	0.0435431	chr22	19115660	19116802	si:dkey-21e2.7
peak148756	321.928	0.954825	0.266949	3.57681	0.000347815	0.0424959	chr22	21447717	21448264	s1pr3a
peak148756	321.928	0.954825	0.266949	3.57681	0.000347815	0.0424959	chr22	21447717	21448264	shdb
peak14923	90.2561	4.66302	0.588327	7.92589	2.26522e-15	7.94671e-12	chr10	20027498	20027870	gfra2b
peak14923	90.2561	4.66302	0.588327	7.92589	2.26522e-15	7.94671e-12	chr10	20027498	20027870	xpo7
peak150152	153.062	1.32772	0.37576	3.53343	0.000410204	0.04738	chr22	30944214	30944724	si:dkey-49n23.1
peak150152	153.062	1.32772	0.37576	3.53343	0.000410204	0.04738	chr22	30944214	30944724	zgc:136895
peak151204	52.8035	6.80502	1.19132	5.71218	1.11541e-08	9.23437e-06	chr22	36834155	36834397	NA
peak15129	165.995	1.34179	0.360256	3.72454	0.000195668	0.027762	chr10	20958467	20958901	kcnip3b
peak15129	165.995	1.34179	0.360256	3.72454	0.000195668	0.027762	chr10	20958467	20958901	pcdh1a
peak15131	148.87	1.61427	0.368326	4.38271	1.17211e-05	0.00309305	chr10	20960746	20961457	kcnip3b
peak15131	148.87	1.61427	0.368326	4.38271	1.17211e-05	0.00309305	chr10	20960746	20961457	pcdh1a
peak15197	414.181	1.28252	0.23333	5.4966	3.87174e-08	2.65407e-05	chr10	21271915	21272676	pcdh1a
peak15197	414.181	1.28252	0.23333	5.4966	3.87174e-08	2.65407e-05	chr10	21271915	21272676	si:dkey-106m10.4
peak152446	46.9265	2.91078	0.756158	3.84943	0.000118392	0.0186298	chr23	2807697	2807947	top1
peak152446	46.9265	2.91078	0.756158	3.84943	0.000118392	0.0186298	chr23	2807697	2807947	zgc:114123
peak15295	120.512	1.41695	0.399537	3.54648	0.000390416	0.0458041	chr10	21870537	21870938	pcdh1gc5
peak15295	120.512	1.41695	0.399537	3.54648	0.000390416	0.0458041	chr10	21870537	21870938	zgc:171684
peak15302	367.28	0.938546	0.239932	3.91172	9.16429e-05	0.015338	chr10	21894651	21895172	pcdh1gc5
peak15302	367.28	0.938546	0.239932	3.91172	9.16429e-05	0.015338	chr10	21894651	21895172	zgc:171684
peak15384	190.387	1.27948	0.329073	3.88813	0.000101018	0.0165109	chr10	22186331	22186677	cldn7b
peak15384	190.387	1.27948	0.329073	3.88813	0.000101018	0.0165109	chr10	22186331	22186677	fgf11b
peak154897	38.9744	3.14251	0.807937	3.88955	0.00010043	0.0164696	chr23	16558695	16558968	ntsr1
peak154897	38.9744	3.14251	0.807937	3.88955	0.00010043	0.0164696	chr23	16558695	16558968	snphb
peak15533	29.6017	3.11478	0.8649	3.60132	0.000316603	0.0395566	chr10	22822361	22822618	si:ch211-237l4.5
peak15533	29.6017	3.11478	0.8649	3.60132	0.000316603	0.0395566	chr10	22822361	22822618	tmem88a
peak15911	49.5585	4.26244	0.751715	5.67029	1.42554e-08	1.12854e-05	chr10	24688064	24688580	vps36
peak15999	94.3968	2.33128	0.46523	5.01101	5.41442e-07	0.00025293	chr10	25365597	25365921	tmem135
peak160052	246.609	1.12313	0.28587	3.92883	8.53611e-05	0.0145868	chr23	38480414	38480857	pfdn4
peak160052	246.609	1.12313	0.28587	3.92883	8.53611e-05	0.0145868	chr23	38480414	38480857	zfp64
peak161778	200.349	1.33137	0.317896	4.18806	2.8135e-05	0.00627652	chr24	617016	617802	ccr12.2
peak161778	200.349	1.33137	0.317896	4.18806	2.8135e-05	0.00627652	chr24	617016	617802	zgc:110852
peak162351	409.978	1.32166	0.230791	5.72664	1.02437e-08	8.75645e-06	chr24	2678347	2678941	fars2
peak162351	409.978	1.32166	0.230791	5.72664	1.02437e-08	8.75645e-06	chr24	2678347	2678941	inhbaa
peak162382	628.138	0.694381	0.193212	3.59389	0.000325778	0.040337	chr24	2844188	2844675	cyb5a
peak162476	142.29	1.30412	0.36882	3.53592	0.000406354	0.0471151	chr24	3282589	3283022	bdh1
peak162476	142.29	1.30412	0.36882	3.53592	0.000406354	0.0471151	chr24	3282589	3283022	gyg1b
peak162881	120.937	1.557	0.405509	3.83961	0.000123232	0.0191889	chr24	4744379	4744939	agtr1b
peak162881	120.937	1.557	0.405509	3.83961	0.000123232	0.0191889	chr24	4744379	4744939	cpb1
peak162910	222.764	1.1169	0.317448	3.51838	0.000434186	0.0497327	chr24	4821310	4822011	agtr1b
peak162910	222.764	1.1169	0.317448	3.51838	0.000434186	0.0497327	chr24	4821310	4822011	zic1
peak162994	725.321	0.747459	0.187565	3.98506	6.74635e-05	0.0122305	chr24	5073057	5074218	plod2
peak162994	725.321	0.747459	0.187565	3.98506	6.74635e-05	0.0122305	chr24	5073057	5074218	zic4
peak163116	132.365	2.58785	0.412366	6.27562	3.48233e-10	4.79262e-07	chr24	5688719	5689101	chst2b
peak163116	132.365	2.58785	0.412366	6.27562	3.48233e-10	4.79262e-07	chr24	5688719	5689101	plod2
peak163212	58.3219	2.14652	0.577705	3.71561	0.000202718	0.0284912	chr24	6071444	6071911	apbb1ip
peak163212	58.3219	2.14652	0.577705	3.71561	0.000202718	0.0284912	chr24	6071444	6071911	gad2
peak163264	44.7496	3.95694	0.752281	5.25992	1.44116e-07	8.23786e-05	chr24	6265981	6266272	myo3a
peak163264	44.7496	3.95694	0.752281	5.25992	1.44116e-07	8.23786e-05	chr24	6265981	6266272	zgc:174877
peak164096	304.937	1.00066	0.275992	3.6257	0.000288182	0.0368813	chr24	10401358	10401925	fam49bb
peak164096	304.937	1.00066	0.275992	3.6257	0.000288182	0.0368813	chr24	10401358	10401925	myca
peak164408	25.5438	4.29241	1.03836	4.13383	3.5677e-05	0.00757194	chr24	12010373	12010595	ccr9b
peak164408	25.5438	4.29241	1.03836	4.13383	3.5677e-05	0.00757194	chr24	12010373	12010595	fen1
peak166234	49.2805	3.77194	0.708865	5.32109	1.03145e-07	6.27694e-05	chr24	21841445	21841707	sat1b
peak166234	49.2805	3.77194	0.708865	5.32109	1.03145e-07	6.27694e-05	chr24	21841445	21841707	si:rp71-1f1.4
peak166858	117.36	2.23638	0.418801	5.33996	9.29678e-08	5.79559e-05	chr24	24484831	24485554	armc1
peak166858	117.36	2.23638	0.418801	5.33996	9.29678e-08	5.79559e-05	chr24	24484831	24485554	bhlhe22
peak167194	102.277	2.05588	0.461555	4.45424	8.41907e-06	0.0024256	chr24	26267037	26267616	cldn11b
peak167194	102.277	2.05588	0.461555	4.45424	8.41907e-06	0.0024256	chr24	26267037	26267616	zgc:194621
peak167313	130.556	3.11492	0.414782	7.50977	5.92298e-14	1.58166e-10	chr24	26748055	26748588	ghsrb
peak167313	130.556	3.11492	0.414782	7.50977	5.92298e-14	1.58166e-10	chr24	26748055	26748588	nceh1b
peak167502	70.7102	2.43413	0.533431	4.56316	5.03884e-06	0.00159845	chr24	27645088	27645454	ek1
peak167502	70.7102	2.43413	0.533431	4.56316	5.03884e-06	0.00159845	chr24	27645088	27645454	hs6st1b
peak167506	46.1852	2.58021	0.66147	3.90072	9.59082e-05	0.0159474	chr24	27663907	27664329	ek1
peak167506	46.1852	2.58021	0.66147	3.90072	9.59082e-05	0.0159474	chr24	27663907	27664329	hs6st1b
peak168942	752.983	0.661786	0.180116	3.67423	0.000238565	0.0323845	chr24	35721030	35721814	cebpd
peak168942	752.983	0.661786	0.180116	3.67423	0.000238565	0.0323845	chr24	35721030	35721814	zgc:171788
peak169097	139.786	5.36136	0.545414	9.82989	8.37126e-23	1.06982e-18	chr24	36602156	36602872	si:ch73-334d15.4
peak169097	139.786	5.36136	0.545414	9.82989	8.37126e-23	1.06982e-18	chr24	36602156	36602872	zgc:114120
peak169114	438.411	1.11624	0.224133	4.98025	6.35025e-07	0.000290577	chr24	36678999	36679758	si:ch73-334d15.4
peak169114	438.411	1.11624	0.224133	4.98025	6.35025e-07	0.000290577	chr24	36678999	36679758	zgc:114120
peak169128	27.7253	4.44195	1.01211	4.38882	1.13965e-05	0.00303424	chr24	36757082	36757312	ccr10
peak169128	27.7253	4.44195	1.01211	4.38882	1.13965e-05	0.00303424	chr24	36757082	36757312	si:ch73-334d15.4
peak169129	34.0252	6.18094	1.27508	4.84748	1.25039e-06	0.000519059	chr24	36758081	36758325	ccr10
peak169129	34.0252	6.18094	1.27508	4.84748	1.25039e-06	0.000519059	chr24	36758081	36758325	si:ch73-334d15.4
peak169131	39.2797	7.32661	1.56705	4.67541	2.93368e-06	0.00103936	chr24	36759764	36759992	ccr10
peak169131	39.2797	7.32661	1.56705	4.67541	2.93368e-06	0.00103936	chr24	36759764	36759992	si:ch73-334d15.4
peak169133	17.8352	5.33653	1.46617	3.63977	0.000272884	0.0354698	chr24	36767235	36767439	ccr10
peak169133	17.8352	5.33653	1.46617	3.63977	0.000272884	0.0354698	chr24	36767235	36767439	si:ch73-334d15.4
peak169134	21.5874	7.90295	1.7114	4.61784	3.87748e-06	0.00129515	chr24	36772613	36772852	ccr10
peak169134	21.5874	7.90295	1.7114	4.61784	3.87748e-06	0.00129515	chr24	36772613	36772852	si:ch73-334d15.4
peak169136	17.0528	7.56361	1.77593	4.25895	2.05387e-05	0.00487358	chr24	36780890	36781139	ccr10
peak169136	17.0528	7.56361	1.77593	4.25895	2.05387e-05	0.00487358	chr24	36780890	36781139	si:ch73-334d15.4
peak169138	36.253	6.26059	1.25567	4.98585	6.16912e-07	0.000283012	chr24	36782507	36782790	ccr10
peak169138	36.253	6.26059	1.25567	4.98585	6.16912e-07	0.000283012	chr24	36782507	36782790	si:ch73-334d15.4
peak169522	832.157	0.61788	0.173692	3.55734	0.000374636	0.0447524	chr24	38943427	38944150	atp6v0cb
peak169522	832.157	0.61788	0.173692	3.55734	0.000374636	0.0447524	chr24	38943427	38944150	nog2
peak169542	260.741	1.1389	0.291807	3.90291	9.50427e-05	0.0158329	chr24	39025743	39026516	atp6v0cb
peak169542	260.741	1.1389	0.291807	3.90291	9.50427e-05	0.0158329	chr24	39025743	39026516	nog2
peak169625	143.847	1.33243	0.369175	3.60921	0.000307134	0.038562	chr24	39326556	39326898	im:7160594
peak169625	143.847	1.33243	0.369175	3.60921	0.000307134	0.038562	chr24	39326556	39326898	si:dkey-161j23.4
peak169959	494.229	0.838343	0.215511	3.89003	0.000100232	0.0164523	chr24	41275077	41275528	acvr2b
peak169959	494.229	0.838343	0.215511	3.89003	0.000100232	0.0164523	chr24	41275077	41275528	rheb
peak170020	140.954	1.40611	0.397186	3.54018	0.00039985	0.0464756	chr24	41574371	41574765	ptprmb
peak170020	140.954	1.40611	0.397186	3.54018	0.00039985	0.0464756	chr24	41574371	41574765	xylb
peak170664	1290.91	0.610463	0.150806	4.04799	5.16597e-05	0.0100029	chr25	1852395	1853446	fbln1
peak170664	1290.91	0.610463	0.150806	4.04799	5.16597e-05	0.0100029	chr25	1852395	1853446	wnt7bb
peak171007	32.5584	3.1888	0.885095	3.60277	0.000314841	0.0393915	chr25	3327146	3327452	hbp1
peak171007	32.5584	3.1888	0.885095	3.60277	0.000314841	0.0393915	chr25	3327146	3327452	slc35b4
peak171111	166.528	1.47972	0.34882	4.24207	2.2147e-05	0.00517964	chr25	3858796	3859379	fads2
peak171111	166.528	1.47972	0.34882	4.24207	2.2147e-05	0.00517964	chr25	3858796	3859379	myrf
peak171261	496.371	0.889478	0.23152	3.84191	0.000122079	0.0190425	chr25	4586682	4587165	drd4a
peak171261	496.371	0.889478	0.23152	3.84191	0.000122079	0.0190425	chr25	4586682	4587165	zgc:194895
peak171855	19.1477	5.33721	1.43343	3.72339	0.000196564	0.0278671	chr25	7528380	7528600	myo5ab
peak171888	145.883	1.67845	0.372991	4.49997	6.79617e-06	0.00204703	chr25	7686833	7687362	mdkb
peak171888	145.883	1.67845	0.372991	4.49997	6.79617e-06	0.00204703	chr25	7686833	7687362	phf21ab
peak174490	33.2115	6.18251	1.28396	4.8152	1.47052e-06	0.000590628	chr25	21785051	21785295	ckmt1
peak174490	33.2115	6.18251	1.28396	4.8152	1.47052e-06	0.000590628	chr25	21785051	21785295	si:ch211-147k9.7
peak174719	69.6465	1.86019	0.526399	3.5338	0.000409634	0.0473447	chr25	23109749	23110541	dusp8a
peak174719	69.6465	1.86019	0.526399	3.5338	0.000409634	0.0473447	chr25	23109749	23110541	ptprjb
peak176191	212.476	1.28548	0.306888	4.18875	2.80496e-05	0.00627311	chr25	31994269	31994747	galk2
peak176191	212.476	1.28548	0.306888	4.18875	2.80496e-05	0.00627311	chr25	31994269	31994747	si:ch211-167m1.4
peak176308	199.964	1.35543	0.317929	4.26332	2.01412e-05	0.00479197	chr25	32489403	32489919	rps27.2
peak176308	199.964	1.35543	0.317929	4.26332	2.01412e-05	0.00479197	chr25	32489403	32489919	tpm1
peak177443	83.2848	1.99777	0.508303	3.93027	8.48512e-05	0.0145553	chr3	1268605	1269009	zgc:153921
peak177804	889.356	0.618699	0.174042	3.55489	0.000378136	0.044943	chr3	5317921	5318664	myh9b
peak177900	44.7212	4.88497	0.86758	5.63057	1.7961e-08	1.37918e-05	chr3	5977514	5977891	mcoln1b
peak177900	44.7212	4.88497	0.86758	5.63057	1.7961e-08	1.37918e-05	chr3	5977514	5977891	zgc:162290
peak178187	264.702	1.07176	0.296715	3.61207	0.000303758	0.0381918	chr3	7718916	7719528	zgc:109949
peak178187	264.702	1.07176	0.296715	3.61207	0.000303758	0.0381918	chr3	7718916	7719528	zgc:174623
peak178311	165.978	1.91344	0.350561	5.45822	4.80939e-08	3.22274e-05	chr3	8424228	8424606	rbfox3l
peak178311	165.978	1.91344	0.350561	5.45822	4.80939e-08	3.22274e-05	chr3	8424228	8424606	trim35-10
peak178338	173.316	1.99468	0.346622	5.75464	8.68245e-09	7.80613e-06	chr3	8569395	8569813	rbfox3l
peak178338	173.316	1.99468	0.346622	5.75464	8.68245e-09	7.80613e-06	chr3	8569395	8569813	si:ch211-209n20.1
peak178339	150.845	1.38418	0.359269	3.85277	0.000116791	0.0184102	chr3	8570559	8571003	rbfox3l
peak178339	150.845	1.38418	0.359269	3.85277	0.000116791	0.0184102	chr3	8570559	8571003	si:ch211-209n20.1
peak178347	490.749	1.06893	0.213227	5.0131	5.35596e-07	0.000252174	chr3	8608256	8608965	rbfox3l
peak178347	490.749	1.06893	0.213227	5.0131	5.35596e-07	0.000252174	chr3	8608256	8608965	si:ch211-209n20.1
peak178382	91.4457	2.05292	0.477175	4.30224	1.69082e-05	0.0041554	chr3	8787369	8787849	rbfox3l
peak178382	91.4457	2.05292	0.477175	4.30224	1.69082e-05	0.0041554	chr3	8787369	8787849	si:ch211-209n20.1
peak178534	309.631	1.40858	0.266599	5.28352	1.26723e-07	7.43363e-05	chr3	10188973	10189444	cbx2
peak178534	309.631	1.40858	0.266599	5.28352	1.26723e-07	7.43363e-05	chr3	10188973	10189444	nog1
peak178554	394.505	0.864231	0.232608	3.71539	0.000202887	0.0284925	chr3	10336568	10337467	cbx2
peak178554	394.505	0.864231	0.232608	3.71539	0.000202887	0.0284925	chr3	10336568	10337467	nog1
peak178603	298.678	1.03358	0.276172	3.74251	0.000182189	0.0261607	chr3	10615454	10616251	elac2
peak178646	75.7271	2.20064	0.554498	3.96871	7.22632e-05	0.0129032	chr3	11443813	11444143	mrps7
peak178646	75.7271	2.20064	0.554498	3.96871	7.22632e-05	0.0129032	chr3	11443813	11444143	si:dkey-118j18.1
peak17868	84.8428	2.75949	0.735374	3.7525	0.000175076	0.025349	chr10	33994438	33994776	kl
peak17868	84.8428	2.75949	0.735374	3.7525	0.000175076	0.025349	chr10	33994438	33994776	rxfp2b
peak179429	316.229	1.48531	0.259261	5.72903	1.01008e-08	8.73033e-06	chr3	15289464	15289839	atxn2l
peak179429	316.229	1.48531	0.259261	5.72903	1.01008e-08	8.73033e-06	chr3	15289464	15289839	si:dkey-56d12.4
peak179430	137.13	1.70429	0.386372	4.41101	1.02889e-05	0.0028277	chr3	15294574	15295350	si:dkey-56d12.4
peak179891	135.29	1.6817	0.38992	4.31293	1.61106e-05	0.00402012	chr3	17345052	17345663	hcrt
peak179891	135.29	1.6817	0.38992	4.31293	1.61106e-05	0.00402012	chr3	17345052	17345663	si:ch211-210g13.5
peak179899	109.236	1.48474	0.41922	3.54167	0.00039761	0.0463476	chr3	17386984	17387482	hcrt
peak179944	58.9777	2.15894	0.57991	3.72288	0.00019696	0.0279012	chr3	17579270	17579571	nkiras2
peak179944	58.9777	2.15894	0.57991	3.72288	0.00019696	0.0279012	chr3	17579270	17579571	si:dkey-26l17.1
peak180013	241.626	4.99615	0.385293	12.9671	1.87942e-38	3.36256e-33	chr3	17856597	17857605	aclya
peak180013	241.626	4.99615	0.385293	12.9671	1.87942e-38	3.36256e-33	chr3	17856597	17857605	zgc:73324
peak180020	117.683	1.83491	0.412812	4.4449	8.79308e-06	0.00251312	chr3	17877259	17877696	aclya
peak180020	117.683	1.83491	0.412812	4.4449	8.79308e-06	0.00251312	chr3	17877259	17877696	zgc:73324
peak180052	21.8593	7.92032	1.70832	4.63632	3.54674e-06	0.00120183	chr3	17996412	17996655	tob1a
peak180052	21.8593	7.92032	1.70832	4.63632	3.54674e-06	0.00120183	chr3	17996412	17996655	wfikkn2a
peak180114	41.5453	2.46112	0.692785	3.5525	0.000381587	0.0451233	chr3	18269009	18269245	gaa
peak180114	41.5453	2.46112	0.692785	3.5525	0.000381587	0.0451233	chr3	18269009	18269245	tbc1d16
peak180286	29.2548	4.88841	1.07	4.5686	4.90985e-06	0.00156865	chr3	19122103	19122483	ldlr
peak180286	29.2548	4.88841	1.07	4.5686	4.90985e-06	0.00156865	chr3	19122103	19122483	smarca4
peak180288	142.361	1.73435	0.37616	4.61067	4.01382e-06	0.00131813	chr3	19133027	19133424	ldlr
peak180288	142.361	1.73435	0.37616	4.61067	4.01382e-06	0.00131813	chr3	19133027	19133424	smarca4
peak180380	317.507	1.05091	0.258843	4.06004	4.90643e-05	0.00970158	chr3	19582007	19582519	rnd2
peak180380	317.507	1.05091	0.258843	4.06004	4.90643e-05	0.00970158	chr3	19582007	19582519	tlk2
peak180556	41.3496	2.77855	0.760542	3.65338	0.000258807	0.0342861	chr3	20309839	20310079	sepw2a
peak180556	41.3496	2.77855	0.760542	3.65338	0.000258807	0.0342861	chr3	20309839	20310079	spop
peak180638	50.7251	4.42883	0.768433	5.76346	8.24086e-09	7.44653e-06	chr3	20765403	20765780	slc35b1
peak180638	50.7251	4.42883	0.768433	5.76346	8.24086e-09	7.44653e-06	chr3	20765403	20765780	slc35b1
peak180644	75.6102	2.92101	0.531414	5.49667	3.87022e-08	2.65407e-05	chr3	20798429	20798983	slc35b1
peak180644	75.6102	2.92101	0.531414	5.49667	3.87022e-08	2.65407e-05	chr3	20798429	20798983	slc35b1
peak180713	175.836	1.39946	0.334988	4.17764	2.94545e-05	0.00647402	chr3	21088736	21089148	zgc:112038
peak180713	175.836	1.39946	0.334988	4.17764	2.94545e-05	0.00647402	chr3	21088736	21089148	zgc:153968
peak181578	52.9337	3.2348	0.653846	4.94734	7.52347e-07	0.00033401	chr3	24538677	24539165	slc25a17
peak181578	52.9337	3.2348	0.653846	4.94734	7.52347e-07	0.00033401	chr3	24538677	24539165	zgc:113411
peak181773	389.972	0.980315	0.239022	4.10136	4.10723e-05	0.00852489	chr3	25377740	25378857	mchr1b
peak182284	26.2854	3.847	0.963488	3.99278	6.53029e-05	0.0119832	chr3	27666000	27666239	carhsp1
peak182762	343.892	1.01897	0.262915	3.87568	0.000106329	0.0171386	chr3	29803690	29804401	grna
peak182762	343.892	1.01897	0.262915	3.87568	0.000106329	0.0171386	chr3	29803690	29804401	rpl27
peak183400	44.8224	2.83103	0.691085	4.0965	4.19447e-05	0.00864591	chr3	32398825	32399103	nosip
peak183473	66.0435	2.91044	0.571905	5.08904	3.59886e-07	0.00017738	chr3	32681785	32682349	hsd3b7
peak183473	66.0435	2.91044	0.571905	5.08904	3.59886e-07	0.00017738	chr3	32681785	32682349	mylpfa
peak183480	80.5715	1.98804	0.49418	4.02291	5.74836e-05	0.0108486	chr3	32706558	32706851	cd2bp2
peak183480	80.5715	1.98804	0.49418	4.02291	5.74836e-05	0.0108486	chr3	32706558	32706851	zgc:162613
peak183808	88.0052	2.21508	0.480035	4.6144	3.94223e-06	0.00130858	chr3	34092552	34092897	si:dkey-204f11.59
peak183808	88.0052	2.21508	0.480035	4.6144	3.94223e-06	0.00130858	chr3	34092552	34092897	znf207a
peak184098	226.383	1.16634	0.306232	3.80869	0.000139705	0.0211824	chr3	35310164	35310810	ndufab1b
peak184098	226.383	1.16634	0.306232	3.80869	0.000139705	0.0211824	chr3	35310164	35310810	rbbp6
peak184504	113.491	2.01165	0.432176	4.65471	3.24441e-06	0.00113153	chr3	37114775	37115246	fmnl1a
peak184504	113.491	2.01165	0.432176	4.65471	3.24441e-06	0.00113153	chr3	37114775	37115246	si:ch211-278a6.1
peak184521	267.009	1.35056	0.280457	4.81557	1.46779e-06	0.000590628	chr3	37215959	37216607	fmnl1a
peak184521	267.009	1.35056	0.280457	4.81557	1.46779e-06	0.000590628	chr3	37215959	37216607	si:ch211-278a6.1
peak184708	120.567	2.18184	0.423924	5.14678	2.65e-07	0.000135078	chr3	38461743	38462245	asic2
peak184708	120.567	2.18184	0.423924	5.14678	2.65e-07	0.000135078	chr3	38461743	38462245	si:dkey-106c17.3
peak184769	58.8099	2.76791	0.609704	4.53975	5.63202e-06	0.00175549	chr3	38764088	38764470	si:dkey-106c17.3
peak184769	58.8099	2.76791	0.609704	4.53975	5.63202e-06	0.00175549	chr3	38764088	38764470	zgc:158687
peak185203	33.9981	3.16838	0.893803	3.54483	0.000392863	0.0460502	chr3	40595939	40596252	rnf216
peak185203	33.9981	3.16838	0.893803	3.54483	0.000392863	0.0460502	chr3	40595939	40596252	smurf1
peak18528	325.528	0.937161	0.262504	3.57009	0.000356864	0.0432283	chr10	37166815	37167454	cuedc1a
peak18528	325.528	0.937161	0.262504	3.57009	0.000356864	0.0432283	chr10	37166815	37167454	vezf1a
peak185570	39.7054	4.40575	0.908683	4.8485	1.24396e-06	0.00051759	chr3	42287277	42287537	mafk
peak185570	39.7054	4.40575	0.908683	4.8485	1.24396e-06	0.00051759	chr3	42287277	42287537	micall2a
peak186988	328.829	0.973851	0.251604	3.87057	0.000108583	0.0174547	chr3	50978861	50979367	ttyh2l
peak186988	328.829	0.973851	0.251604	3.87057	0.000108583	0.0174547	chr3	50978861	50979367	tubb4b
peak18753	175.344	1.24268	0.339945	3.65553	0.000256655	0.0341155	chr10	38197601	38198042	si:ch211-55a7.1
peak18753	175.344	1.24268	0.339945	3.65553	0.000256655	0.0341155	chr10	38197601	38198042	usp25
peak187598	81.8277	1.9142	0.487477	3.92675	8.60996e-05	0.0146683	chr3	54443019	54443316	s1pr2
peak187598	81.8277	1.9142	0.487477	3.92675	8.60996e-05	0.0146683	chr3	54443019	54443316	si:ch211-74m13.3
peak188156	120.878	1.41395	0.39892	3.54443	0.00039346	0.0460502	chr3	57097560	57098145	fscn2a
peak188156	120.878	1.41395	0.39892	3.54443	0.00039346	0.0460502	chr3	57097560	57098145	zgc:112148
peak188320	33.0568	6.05402	1.25214	4.83496	1.33174e-06	0.000546487	chr3	58161551	58161874	im:6904045
peak188320	33.0568	6.05402	1.25214	4.83496	1.33174e-06	0.000546487	chr3	58161551	58161874	uqcrc2a
peak188974	178.268	1.32029	0.33979	3.8856	0.00010208	0.0165665	chr3	62048341	62048753	zgc:173575
peak189086	103.41	1.52809	0.431291	3.54306	0.000395509	0.0461897	chr4	508	1214	ptpro
peak189139	175.446	2.52142	0.355709	7.08842	1.35651e-12	3.11191e-09	chr4	138610	139584	crebl2
peak189139	175.446	2.52142	0.355709	7.08842	1.35651e-12	3.11191e-09	chr4	138610	139584	gpr19
peak189140	153.794	4.57191	0.456337	10.0187	1.26129e-23	1.76667e-19	chr4	139746	140159	crebl2
peak189140	153.794	4.57191	0.456337	10.0187	1.26129e-23	1.76667e-19	chr4	139746	140159	gpr19
peak189141	60.3449	3.67406	0.65865	5.57817	2.43061e-08	1.76778e-05	chr4	140242	140538	crebl2
peak189141	60.3449	3.67406	0.65865	5.57817	2.43061e-08	1.76778e-05	chr4	140242	140538	gpr19
peak189146	429.148	1.04506	0.225007	4.64456	3.40802e-06	0.00117034	chr4	149470	150099	crebl2
peak189146	429.148	1.04506	0.225007	4.64456	3.40802e-06	0.00117034	chr4	149470	150099	dusp16
peak189156	54.0777	2.94742	0.638819	4.61385	3.95271e-06	0.00130963	chr4	176738	176977	dusp16
peak189156	54.0777	2.94742	0.638819	4.61385	3.95271e-06	0.00130963	chr4	176738	176977	lrp6
peak189172	71.6221	1.90529	0.519089	3.67044	0.000242129	0.0327045	chr4	219582	219900	zgc:158374
peak189172	71.6221	1.90529	0.519089	3.67044	0.000242129	0.0327045	chr4	219582	219900	zgc:92022
peak189220	68.2904	2.43798	0.567587	4.29534	1.74422e-05	0.00424581	chr4	389814	390066	pthlha
peak189220	68.2904	2.43798	0.567587	4.29534	1.74422e-05	0.00424581	chr4	389814	390066	rpl18a
peak189506	194.554	1.72383	0.322292	5.34864	8.86163e-08	5.62226e-05	chr4	1437979	1438639	krr1
peak189506	194.554	1.72383	0.322292	5.34864	8.86163e-08	5.62226e-05	chr4	1437979	1438639	phlda1
peak189667	18.5997	5.07526	1.4419	3.51984	0.000431813	0.0495561	chr4	2001722	2001951	ano6
peak189667	18.5997	5.07526	1.4419	3.51984	0.000431813	0.0495561	chr4	2001722	2001951	pwp1
peak189791	264.349	1.041	0.27716	3.75595	0.000172686	0.025078	chr4	2533347	2533947	nap1l1
peak189791	264.349	1.041	0.27716	3.75595	0.000172686	0.025078	chr4	2533347	2533947	zdhhc17
peak19030	196.521	1.17738	0.331399	3.55275	0.00038122	0.0451233	chr10	39373193	39373610	dcps
peak19030	196.521	1.17738	0.331399	3.55275	0.00038122	0.0451233	chr10	39373193	39373610	kcnj1b
peak19082	179.992	1.26243	0.33268	3.79473	0.000147804	0.0220921	chr10	39652426	39653117	kirrel3a
peak19082	179.992	1.26243	0.33268	3.79473	0.000147804	0.0220921	chr10	39652426	39653117	smfn
peak19100	469.716	1.15814	0.219066	5.28673	1.24523e-07	7.32862e-05	chr10	39777684	39778328	kirrel3a
peak19100	469.716	1.15814	0.219066	5.28673	1.24523e-07	7.32862e-05	chr10	39777684	39778328	smfn
peak191328	304.878	0.986656	0.270697	3.64488	0.000267519	0.0350948	chr4	8423765	8424286	fbxl14b
peak191328	304.878	0.986656	0.270697	3.64488	0.000267519	0.0350948	chr4	8423765	8424286	samm50l
peak192913	20.6892	5.4302	1.40751	3.85801	0.000114313	0.018127	chr4	14158870	14159119	prickle1b
peak192913	20.6892	5.4302	1.40751	3.85801	0.000114313	0.018127	chr4	14158870	14159119	pus7l
peak192914	44.7146	3.22568	0.734088	4.39413	1.11216e-05	0.00297433	chr4	14163349	14163605	prickle1b
peak192914	44.7146	3.22568	0.734088	4.39413	1.11216e-05	0.00297433	chr4	14163349	14163605	pus7l
peak193197	28.2772	5.24147	1.14217	4.58907	4.45233e-06	0.0014431	chr4	15185336	15185648	nrf1
peak193197	28.2772	5.24147	1.14217	4.58907	4.45233e-06	0.0014431	chr4	15185336	15185648	plxna4
peak19406	752.156	0.80866	0.181176	4.4634	8.0671e-06	0.00235435	chr10	42032559	42033277	kdm2bb
peak19406	752.156	0.80866	0.181176	4.4634	8.0671e-06	0.00235435	chr10	42032559	42033277	orai1b
peak19461	83.4131	3.13752	0.518676	6.0491	1.45656e-09	1.62875e-06	chr10	42279583	42279979	dgcr2
peak19461	83.4131	3.13752	0.518676	6.0491	1.45656e-09	1.62875e-06	chr10	42279583	42279979	stambpa
peak19479	106.959	1.7008	0.446652	3.80788	0.000140163	0.0212159	chr10	42367083	42367493	dusp11
peak19479	106.959	1.7008	0.446652	3.80788	0.000140163	0.0212159	chr10	42367083	42367493	tcf7l1a
peak194878	173.169	1.4884	0.358865	4.14754	3.36071e-05	0.00720098	chr4	21589200	21589932	pawr
peak194878	173.169	1.4884	0.358865	4.14754	3.36071e-05	0.00720098	chr4	21589200	21589932	syt1a
peak194926	154.071	1.39765	0.359216	3.89083	9.99003e-05	0.0164129	chr4	21793942	21794702	pawr
peak194926	154.071	1.39765	0.359216	3.89083	9.99003e-05	0.0164129	chr4	21793942	21794702	ppp1r12a
peak19543	96.6642	2.00128	0.474934	4.21381	2.51098e-05	0.00573758	chr10	42574971	42575472	npy8ar
peak19543	96.6642	2.00128	0.474934	4.21381	2.51098e-05	0.00573758	chr10	42574971	42575472	zgc:86599
peak195800	165.956	1.42453	0.35531	4.00927	6.09071e-05	0.0113041	chr4	26284845	26285277	si:ch211-244b2.4
peak195800	165.956	1.42453	0.35531	4.00927	6.09071e-05	0.0113041	chr4	26284845	26285277	st8sia1
peak196376	104.879	1.65348	0.430053	3.84483	0.000120637	0.0188669	chr4	34575353	34575608	si:rp71-1l17.1
peak196376	104.879	1.65348	0.430053	3.84483	0.000120637	0.0188669	chr4	34575353	34575608	si:rp71-1l17.2
peak196395	20.3268	4.36635	1.17438	3.71799	0.000200812	0.0282962	chr4	35839081	35839358	si:dkey-176f19.2
peak196395	20.3268	4.36635	1.17438	3.71799	0.000200812	0.0282962	chr4	35839081	35839358	si:dkey-176f19.5
peak196446	252.361	1.04237	0.29176	3.57269	0.000353339	0.0430052	chr4	38537213	38537756	si:dkey-122c11.10
peak196446	252.361	1.04237	0.29176	3.57269	0.000353339	0.0430052	chr4	38537213	38537756	si:dkey-122c11.9
peak196461	66.023	5.45347	0.794002	6.86834	6.49532e-12	1.27704e-08	chr4	39280566	39280882	si:dkey-54i3.4
peak196461	66.023	5.45347	0.794002	6.86834	6.49532e-12	1.27704e-08	chr4	39280566	39280882	zgc:174642
peak196463	36.593	3.1467	0.771464	4.07887	4.52557e-05	0.00912153	chr4	39284656	39284990	si:dkey-54i3.4
peak196463	36.593	3.1467	0.771464	4.07887	4.52557e-05	0.00912153	chr4	39284656	39284990	zgc:174642
peak196534	64.2846	2.36595	0.617453	3.8318	0.00012721	0.0196714	chr4	41910377	41910625	si:dkey-20l4.2
peak196534	64.2846	2.36595	0.617453	3.8318	0.00012721	0.0196714	chr4	41910377	41910625	zgc:172014
peak196574	46.4896	4.55	0.822005	5.53524	3.10797e-08	2.2066e-05	chr4	43984758	43985411	si:ch211-209p16.1
peak196574	46.4896	4.55	0.822005	5.53524	3.10797e-08	2.2066e-05	chr4	43984758	43985411	si:dkeyp-100h4.1
peak196581	81.4819	3.06903	0.51986	5.90357	3.55725e-09	3.57554e-06	chr4	44260880	44261185	si:ch211-209p16.2
peak196581	81.4819	3.06903	0.51986	5.90357	3.55725e-09	3.57554e-06	chr4	44260880	44261185	si:dkey-51d8.6
peak196590	27.3454	4.16387	0.986115	4.2225	2.41607e-05	0.00557049	chr4	44380072	44380286	si:dkey-26m3.1
peak196596	25.5251	4.49323	1.11808	4.01871	5.85181e-05	0.0109861	chr4	44456841	44457045	si:ch211-187d1.2
peak196601	19.6036	5.45066	1.42998	3.81169	0.000138019	0.0209979	chr4	44576074	44576302	si:ch211-162i8.3
peak196601	19.6036	5.45066	1.42998	3.81169	0.000138019	0.0209979	chr4	44576074	44576302	si:ch211-162i8.5
peak196613	27.362	5.32645	1.23236	4.32217	1.54504e-05	0.00388792	chr4	44692369	44692673	si:ch211-162i8.7
peak196613	27.362	5.32645	1.23236	4.32217	1.54504e-05	0.00388792	chr4	44692369	44692673	si:dkey-256i11.2
peak196616	24.2334	3.47554	0.984973	3.52856	0.000417831	0.0481057	chr4	44712629	44713178	si:ch211-162i8.7
peak196616	24.2334	3.47554	0.984973	3.52856	0.000417831	0.0481057	chr4	44712629	44713178	si:dkey-256i11.2
peak196618	22.3474	4.75431	1.21761	3.90462	9.43723e-05	0.0157359	chr4	44736901	44737118	si:dkey-256i11.2
peak196642	95.2081	1.81176	0.472492	3.83447	0.000125833	0.0195097	chr4	45203167	45204006	si:dkey-26m3.1
peak196642	95.2081	1.81176	0.472492	3.83447	0.000125833	0.0195097	chr4	45203167	45204006	zgc:174649
peak196644	37.8975	3.74975	0.85177	4.4023	1.07108e-05	0.00290353	chr4	45227092	45227395	si:dkey-26m3.1
peak196644	37.8975	3.74975	0.85177	4.4023	1.07108e-05	0.00290353	chr4	45227092	45227395	zgc:174649
peak196650	28.5262	8.30521	1.65043	5.03215	4.85011e-07	0.000230174	chr4	45311059	45311327	si:dkey-26m3.1
peak196650	28.5262	8.30521	1.65043	5.03215	4.85011e-07	0.000230174	chr4	45311059	45311327	zgc:174649
peak196651	84.0295	2.55238	0.543105	4.69961	2.60658e-06	0.000942135	chr4	45316096	45316404	si:dkey-26m3.1
peak196651	84.0295	2.55238	0.543105	4.69961	2.60658e-06	0.000942135	chr4	45316096	45316404	zgc:174649
peak196654	131.733	5.72357	0.590638	9.69048	3.30957e-22	3.48312e-18	chr4	45348444	45348785	si:dkey-26m3.1
peak196654	131.733	5.72357	0.590638	9.69048	3.30957e-22	3.48312e-18	chr4	45348444	45348785	zgc:174649
peak196668	15.3293	7.40995	1.8096	4.0948	4.22532e-05	0.00868935	chr4	45652423	45652632	msi1
peak196668	15.3293	7.40995	1.8096	4.0948	4.22532e-05	0.00868935	chr4	45652423	45652632	si:dkey-26m3.1
peak196674	28.6333	5.94951	1.3143	4.52674	5.99004e-06	0.00182885	chr4	45760131	45760395	NA
peak196678	25.7401	4.04237	1.02174	3.95636	7.60999e-05	0.0133878	chr4	45876089	45876597	NA
peak196690	42.3906	4.03254	0.783334	5.14792	2.63392e-07	0.000134857	chr4	46037776	46038138	NA
peak196694	88.4505	2.91223	0.73963	3.93742	8.23632e-05	0.0142377	chr4	46095908	46096216	NA
peak196700	42.5076	6.50123	1.22787	5.29473	1.19195e-07	7.03822e-05	chr4	46196424	46196929	NA
peak196707	22.0978	5.60402	1.38855	4.03588	5.4399e-05	0.0104094	chr4	46241572	46241803	NA
peak196718	36.3824	6.2598	1.26348	4.95441	7.25495e-07	0.000326136	chr4	46414514	46414743	NA
peak196722	27.673	5.83931	1.32534	4.40589	1.05352e-05	0.00286894	chr4	46497929	46498159	NA
peak196728	29.4691	3.60922	0.926574	3.89523	9.81049e-05	0.0162222	chr4	46660611	46660878	si:dkey-29p23.3
peak196728	29.4691	3.60922	0.926574	3.89523	9.81049e-05	0.0162222	chr4	46660611	46660878	zgc:174642
peak196762	13.9227	7.26881	1.84268	3.9447	7.9899e-05	0.0139193	chr4	47020671	47020928	si:ch211-234c11.1
peak196762	13.9227	7.26881	1.84268	3.9447	7.9899e-05	0.0139193	chr4	47020671	47020928	si:ch211-286l10.2
peak196768	26.855	4.44352	1.05743	4.20217	2.64364e-05	0.0059796	chr4	47119584	47119860	si:ch211-234c11.1
peak196768	26.855	4.44352	1.05743	4.20217	2.64364e-05	0.0059796	chr4	47119584	47119860	si:ch211-286l10.2
peak196771	13.3339	7.20858	1.85844	3.87884	0.000104955	0.0169581	chr4	47197622	47197854	si:ch211-234c11.2
peak196772	22.0412	7.9337	1.70631	4.64962	3.32552e-06	0.00115084	chr4	47201187	47201409	si:ch211-234c11.2
peak196784	23.7914	4.52662	1.105	4.09649	4.19453e-05	0.00864591	chr4	47766626	47766870	si:ch211-42i6.2
peak196784	23.7914	4.52662	1.105	4.09649	4.19453e-05	0.00864591	chr4	47766626	47766870	zgc:173709
peak196833	22.5558	5.71255	1.40885	4.05476	5.01858e-05	0.00982335	chr4	48873439	48873934	si:ch211-245n8.2
peak196833	22.5558	5.71255	1.40885	4.05476	5.01858e-05	0.00982335	chr4	48873439	48873934	zgc:174704
peak196847	53.4723	7.75874	1.55155	5.00064	5.71404e-07	0.000264167	chr4	49117678	49117959	si:ch211-208f21.2
peak196847	53.4723	7.75874	1.55155	5.00064	5.71404e-07	0.000264167	chr4	49117678	49117959	si:dkey-156j15.1
peak196856	29.3292	5.11374	1.12049	4.56384	5.02262e-06	0.00159845	chr4	49335513	49336096	si:ch211-207e19.13
peak196856	29.3292	5.11374	1.12049	4.56384	5.02262e-06	0.00159845	chr4	49335513	49336096	si:dkey-82i20.3
peak196858	21.4974	7.8977	1.71244	4.61195	3.98915e-06	0.00131813	chr4	49336737	49337080	si:ch211-207e19.13
peak196858	21.4974	7.8977	1.71244	4.61195	3.98915e-06	0.00131813	chr4	49336737	49337080	si:dkey-82i20.3
peak196914	94.1259	1.77905	0.46672	3.8118	0.000137958	0.0209979	chr4	50923641	50923948	si:dkey-8o9.2
peak196914	94.1259	1.77905	0.46672	3.8118	0.000137958	0.0209979	chr4	50923641	50923948	zgc:173702
peak197065	66.5312	3.26471	0.585036	5.58036	2.40018e-08	1.75277e-05	chr4	57151851	57152170	si:ch211-241n15.1
peak197065	66.5312	3.26471	0.585036	5.58036	2.40018e-08	1.75277e-05	chr4	57151851	57152170	si:dkey-105i14.2
peak197079	134.079	2.64163	0.401616	6.5775	4.78427e-11	7.92572e-08	chr4	57609429	57609738	si:dkey-149m13.4
peak197082	27.7276	5.88975	1.31846	4.46714	7.92735e-06	0.00232894	chr4	57650946	57651186	si:ch211-178j18.2
peak197082	27.7276	5.88975	1.31846	4.46714	7.92735e-06	0.00232894	chr4	57650946	57651186	zgc:173710
peak197085	48.7715	6.5489	1.71372	3.82145	0.000132672	0.0203576	chr4	57681564	57681811	si:ch211-178j18.2
peak197085	48.7715	6.5489	1.71372	3.82145	0.000132672	0.0203576	chr4	57681564	57681811	zgc:173710
peak197086	57.1146	6.88825	1.17457	5.86447	4.50577e-09	4.35756e-06	chr4	57741314	57741561	si:ch211-178j18.2
peak197086	57.1146	6.88825	1.17457	5.86447	4.50577e-09	4.35756e-06	chr4	57741314	57741561	zgc:173710
peak197093	80.8804	2.68788	0.579638	4.63717	3.53207e-06	0.00119913	chr4	57868468	57868754	si:ch211-178j18.2
peak197093	80.8804	2.68788	0.579638	4.63717	3.53207e-06	0.00119913	chr4	57868468	57868754	zgc:173710
peak197096	90.2592	7.72505	1.47796	5.22682	1.72447e-07	9.34951e-05	chr4	57911744	57912233	si:ch211-178j18.2
peak197096	90.2592	7.72505	1.47796	5.22682	1.72447e-07	9.34951e-05	chr4	57911744	57912233	si:dkey-196n19.7
peak197143	30.3135	5.33534	1.13034	4.72011	2.3572e-06	0.000864218	chr4	60116719	60116955	zgc:174649
peak197342	32.2622	6.1009	1.28179	4.75965	1.93925e-06	0.000747759	chr4	69058922	69059161	im:7141269
peak197342	32.2622	6.1009	1.28179	4.75965	1.93925e-06	0.000747759	chr4	69058922	69059161	si:ch211-286l10.1
peak197350	23.525	4.8369	1.19868	4.0352	5.4555e-05	0.0104281	chr4	69589911	69590148	si:ch211-76m11.9
peak197350	23.525	4.8369	1.19868	4.0352	5.4555e-05	0.0104281	chr4	69589911	69590148	sparcl1
peak197387	850.744	0.820641	0.17264	4.75349	1.99935e-06	0.000761094	chr4	70691708	70692208	ftr64
peak197387	850.744	0.820641	0.17264	4.75349	1.99935e-06	0.000761094	chr4	70691708	70692208	si:ch211-132a5.3
peak197391	141.757	1.39901	0.371821	3.76259	0.000168163	0.0245608	chr4	70712550	70713267	ftr64
peak197629	37.094	4.63103	0.903503	5.12564	2.96527e-07	0.000148608	chr4	73059517	73059775	nup50
peak197629	37.094	4.63103	0.903503	5.12564	2.96527e-07	0.000148608	chr4	73059517	73059775	ptprb
peak19765	792.644	0.70268	0.180294	3.89742	9.72249e-05	0.0161241	chr10	43682294	43682919	mef2ca
peak19765	792.644	0.70268	0.180294	3.89742	9.72249e-05	0.0161241	chr10	43682294	43682919	rasa1b
peak197659	143.61	3.42596	0.406582	8.42623	3.56984e-17	1.59674e-13	chr4	73320274	73320848	nup50
peak197659	143.61	3.42596	0.406582	8.42623	3.56984e-17	1.59674e-13	chr4	73320274	73320848	ptprb
peak197670	144.542	1.5213	0.40163	3.78782	0.000151976	0.0226591	chr4	73356647	73357002	nup50
peak197670	144.542	1.5213	0.40163	3.78782	0.000151976	0.0226591	chr4	73356647	73357002	ptprb
peak197689	103.007	2.31166	0.465131	4.96992	6.69811e-07	0.000303391	chr4	73488300	73488561	nup50
peak197689	103.007	2.31166	0.465131	4.96992	6.69811e-07	0.000303391	chr4	73488300	73488561	ptprb
peak197756	49.4965	3.83571	0.745348	5.1462	2.65816e-07	0.000135109	chr4	73869065	73869342	im:7143923
peak197756	49.4965	3.83571	0.745348	5.1462	2.65816e-07	0.000135109	chr4	73869065	73869342	zgc:174178
peak197757	106.77	5.93583	0.686933	8.64105	5.56963e-18	2.84712e-14	chr4	73875546	73875827	im:7143923
peak197757	106.77	5.93583	0.686933	8.64105	5.56963e-18	2.84712e-14	chr4	73875546	73875827	zgc:174178
peak197759	28.0364	3.84184	0.94613	4.06058	4.89509e-05	0.00969883	chr4	74023581	74023923	zgc:174178
peak197807	228.162	1.78341	0.348849	5.11227	3.1831e-07	0.000158196	chr4	74908128	74908684	ftr51
peak197807	228.162	1.78341	0.348849	5.11227	3.1831e-07	0.000158196	chr4	74908128	74908684	ms4a17a.17
peak197941	265.45	1.67793	0.280429	5.98342	2.18501e-09	2.3132e-06	chr4	76161941	76162503	NA
peak197977	131.493	1.54667	0.418047	3.69975	0.000215809	0.0298723	chr4	76375870	76376163	NA
peak198139	502.167	0.964768	0.211916	4.55259	5.29887e-06	0.00167432	chr5	311398	312097	ddrgk1
peak198139	502.167	0.964768	0.211916	4.55259	5.29887e-06	0.00167432	chr5	311398	312097	rnf170
peak198204	117.435	2.19893	0.429108	5.12441	2.9847e-07	0.000149164	chr5	691144	691442	tek
peak198204	117.435	2.19893	0.429108	5.12441	2.9847e-07	0.000149164	chr5	691144	691442	zgc:158463
peak198760	59.2065	3.31304	0.616139	5.3771	7.56953e-08	4.85413e-05	chr5	4018160	4018857	sat1a.1
peak198760	59.2065	3.31304	0.616139	5.3771	7.56953e-08	4.85413e-05	chr5	4018160	4018857	zgc:153704
peak198783	21.3271	5.56342	1.40175	3.96891	7.22025e-05	0.0129032	chr5	4185766	4186086	NA
peak198921	45.3011	2.35242	0.663704	3.54438	0.000393543	0.0460502	chr5	5098370	5098743	NA
peak199075	46.2906	2.3998	0.655234	3.66251	0.000249757	0.0335223	chr5	6021894	6022463	tnks1bp1
peak199075	46.2906	2.3998	0.655234	3.66251	0.000249757	0.0335223	chr5	6021894	6022463	zgc:110796
peak200351	122.591	1.80871	0.480502	3.76422	0.000167071	0.0244211	chr5	13804842	13805477	ap3m2
peak200351	122.591	1.80871	0.480502	3.76422	0.000167071	0.0244211	chr5	13804842	13805477	npffr1l2
peak200727	372.299	1.01445	0.252685	4.0147	5.95223e-05	0.0111279	chr5	15288831	15289533	hspb8
peak200727	372.299	1.01445	0.252685	4.0147	5.95223e-05	0.0111279	chr5	15288831	15289533	taok3a
peak202862	193.476	1.43997	0.369027	3.90206	9.53758e-05	0.0158736	chr5	24847080	24847578	rorb
peak202862	193.476	1.43997	0.369027	3.90206	9.53758e-05	0.0158736	chr5	24847080	24847578	si:dkey-229d2.4
peak20295	121.155	6.61262	0.758477	8.71828	2.82464e-18	1.48639e-14	chr11	168679	169001	cdk4
peak20295	121.155	6.61262	0.758477	8.71828	2.82464e-18	1.48639e-14	chr11	168679	169001	itga7
peak20298	22.9719	4.93229	1.19834	4.11593	3.85626e-05	0.00806007	chr11	186497	186729	cdk4
peak20298	22.9719	4.93229	1.19834	4.11593	3.85626e-05	0.00806007	chr11	186497	186729	tegt
peak203535	237.449	1.17518	0.291067	4.03749	5.40262e-05	0.0103602	chr5	27989982	27990689	tnc
peak203535	237.449	1.17518	0.291067	4.03749	5.40262e-05	0.0103602	chr5	27989982	27990689	zgc:162952
peak20398	56.817	2.96168	0.640415	4.62463	3.75263e-06	0.00126323	chr11	576538	577063	pparg
peak20398	56.817	2.96168	0.640415	4.62463	3.75263e-06	0.00126323	chr11	576538	577063	tsen2
peak20429	81.787	7.39066	1.12956	6.54297	6.031e-11	9.72105e-08	chr11	700935	701275	NA
peak20436	371.687	1.07939	0.239807	4.50108	6.76106e-06	0.00203989	chr11	750251	750725	tamm41
peak20436	371.687	1.07939	0.239807	4.50108	6.76106e-06	0.00203989	chr11	750251	750725	vgll4b
peak20459	79.4504	1.84623	0.514763	3.58656	0.000335074	0.0413161	chr11	818349	818632	hrh1
peak20459	79.4504	1.84623	0.514763	3.58656	0.000335074	0.0413161	chr11	818349	818632	vgll4b
peak20496	538.507	0.735697	0.204708	3.59389	0.00032578	0.040337	chr11	942887	943683	hrh1
peak20496	538.507	0.735697	0.204708	3.59389	0.00032578	0.040337	chr11	942887	943683	slc6a1b
peak205062	242.92	1.02678	0.287492	3.57151	0.000354932	0.043077	chr5	34655325	34655759	fcho2
peak205062	242.92	1.02678	0.287492	3.57151	0.000354932	0.043077	chr5	34655325	34655759	ptcd2
peak20534	249.002	1.09627	0.285373	3.84154	0.000122267	0.0190552	chr11	1096705	1097737	atp2b2
peak20534	249.002	1.09627	0.285373	3.84154	0.000122267	0.0190552	chr11	1096705	1097737	slc6a1b
peak206715	87.5677	2.08634	0.473992	4.40164	1.07437e-05	0.00290803	chr5	42691437	42691706	rhobtb2a
peak206715	87.5677	2.08634	0.473992	4.40164	1.07437e-05	0.00290803	chr5	42691437	42691706	wdr54
peak208259	21.0095	5.57935	1.43881	3.87775	0.000105426	0.0170084	chr5	49827488	49827716	fam172a
peak208259	21.0095	5.57935	1.43881	3.87775	0.000105426	0.0170084	chr5	49827488	49827716	zgc:194908
peak208778	110.387	5.40507	0.617593	8.75183	2.09922e-18	1.17369e-14	chr5	52581340	52581755	NA
peak208970	73.8326	7.43012	1.69397	4.38621	1.15341e-05	0.00306177	chr5	54174841	54175147	mast4
peak208970	73.8326	7.43012	1.69397	4.38621	1.15341e-05	0.00306177	chr5	54174841	54175147	pik3r1
peak209091	119.494	1.5214	0.404726	3.7591	0.000170527	0.0248857	chr5	54838137	54838397	NA
peak209154	14.3316	7.31281	1.83247	3.99069	6.58813e-05	0.0120402	chr5	55239412	55239663	camk4
peak209154	14.3316	7.31281	1.83247	3.99069	6.58813e-05	0.0120402	chr5	55239412	55239663	wdr36
peak209405	45.5451	4.56368	0.814514	5.60295	2.10736e-08	1.57757e-05	chr5	56755808	56756160	cdc26
peak209405	45.5451	4.56368	0.814514	5.60295	2.10736e-08	1.57757e-05	chr5	56755808	56756160	prpf4
peak209574	113.469	2.00905	0.475179	4.22799	2.35786e-05	0.00546445	chr5	57866675	57867082	pou2f3
peak209574	113.469	2.00905	0.475179	4.22799	2.35786e-05	0.00546445	chr5	57866675	57867082	slc37a2
peak209633	133.687	1.3939	0.380963	3.65888	0.000253316	0.0338374	chr5	58201580	58202074	tmem136b
peak209633	133.687	1.3939	0.380963	3.65888	0.000253316	0.0338374	chr5	58201580	58202074	zgc:64116
peak211002	165.207	1.33253	0.367222	3.62867	0.000284882	0.0365387	chr5	65534163	65534737	coq2
peak211002	165.207	1.33253	0.367222	3.62867	0.000284882	0.0365387	chr5	65534163	65534737	mboat4
peak211501	66.3037	2.55837	0.56444	4.53258	5.82676e-06	0.00179123	chr5	68111705	68112380	ank1
peak211501	66.3037	2.55837	0.56444	4.53258	5.82676e-06	0.00179123	chr5	68111705	68112380	spaw
peak21163	21.3892	4.37685	1.13725	3.84863	0.00011878	0.0186699	chr11	3954267	3954543	glt8d1
peak21163	21.3892	4.37685	1.13725	3.84863	0.00011878	0.0186699	chr11	3954267	3954543	gnl3
peak212447	329.804	0.95058	0.251993	3.77225	0.00016178	0.0237838	chr6	710974	711531	plxna1
peak212447	329.804	0.95058	0.251993	3.77225	0.00016178	0.0237838	chr6	710974	711531	txnrd1
peak213240	548.111	0.783452	0.203575	3.84847	0.000118856	0.0186699	chr6	3913457	3914040	trim25l
peak213240	548.111	0.783452	0.203575	3.84847	0.000118856	0.0186699	chr6	3913457	3914040	unc50
peak213543	134.068	2.48199	0.402759	6.16248	7.16146e-10	8.83651e-07	chr6	5486662	5487733	rtn4a
peak213543	134.068	2.48199	0.402759	6.16248	7.16146e-10	8.83651e-07	chr6	5486662	5487733	si:ch211-165a18.1
peak213586	64.2643	1.95043	0.550902	3.54042	0.000399487	0.0464722	chr6	5705826	5706319	rtn4a
peak213763	569.318	0.759909	0.200199	3.79576	0.00014719	0.0220372	chr6	6455724	6456734	bcl11ab
peak213763	569.318	0.759909	0.200199	3.79576	0.00014719	0.0220372	chr6	6455724	6456734	zgc:113227
peak213787	90.8126	2.10705	0.468827	4.49429	6.9801e-06	0.00208837	chr6	6541758	6542077	ccdc85al
peak213787	90.8126	2.10705	0.468827	4.49429	6.9801e-06	0.00208837	chr6	6541758	6542077	zgc:113227
peak214113	92.1097	1.7465	0.458484	3.80929	0.000139366	0.021167	chr6	7956814	7957270	nfil3-5
peak214113	92.1097	1.7465	0.458484	3.80929	0.000139366	0.021167	chr6	7956814	7957270	rgl3a
peak214254	72.1473	1.93451	0.517699	3.73674	0.000186421	0.026619	chr6	8676190	8676657	sdprb
peak214254	72.1473	1.93451	0.517699	3.73674	0.000186421	0.026619	chr6	8676190	8676657	zgc:162584
peak214526	69.5337	3.51997	0.594684	5.91906	3.23796e-09	3.29159e-06	chr6	10189630	10189998	si:dkey-240h6.1
peak214526	69.5337	3.51997	0.594684	5.91906	3.23796e-09	3.29159e-06	chr6	10189630	10189998	si:dkey-43i4.1
peak216631	59.4263	2.71612	0.598551	4.53782	5.68391e-06	0.00176245	chr6	23960591	23960847	dr1
peak216631	59.4263	2.71612	0.598551	4.53782	5.68391e-06	0.00176245	chr6	23960591	23960847	si:dkey-44g17.6
peak216830	269.295	1.08456	0.288949	3.75346	0.000174411	0.0252875	chr6	24755981	24756427	barhl2
peak216830	269.295	1.08456	0.288949	3.75346	0.000174411	0.0252875	chr6	24755981	24756427	si:dkey-238n5.3
peak21705	182.948	1.63961	0.367227	4.46484	8.01289e-06	0.00234563	chr11	6625746	6626126	gadd45ba
peak21705	182.948	1.63961	0.367227	4.46484	8.01289e-06	0.00234563	chr11	6625746	6626126	pde4cb
peak218943	84.9422	1.76694	0.476591	3.70745	0.000209354	0.0291945	chr6	34513156	34513576	dmrt2b
peak218943	84.9422	1.76694	0.476591	3.70745	0.000209354	0.0291945	chr6	34513156	34513576	lrp8
peak219131	53.6681	2.48387	0.705843	3.51901	0.000433156	0.0496465	chr6	35370110	35370482	rgs4
peak219131	53.6681	2.48387	0.705843	3.51901	0.000433156	0.0496465	chr6	35370110	35370482	uhmk1
peak221322	845.309	0.726243	0.17306	4.19647	2.71102e-05	0.00610884	chr6	45888799	45889621	epha2
peak221322	845.309	0.726243	0.17306	4.19647	2.71102e-05	0.00610884	chr6	45888799	45889621	rbm19
peak221504	22.2424	5.55068	1.39173	3.98832	6.65434e-05	0.012122	chr6	47138637	47138903	grm4
peak221504	22.2424	5.55068	1.39173	3.98832	6.65434e-05	0.012122	chr6	47138637	47138903	zgc:113358
peak221507	54.6125	5.50145	0.887048	6.20198	5.57583e-10	7.12571e-07	chr6	47161386	47161694	grm4
peak221507	54.6125	5.50145	0.887048	6.20198	5.57583e-10	7.12571e-07	chr6	47161386	47161694	zgc:113358
peak221546	19.8639	7.78251	1.73268	4.49159	7.06931e-06	0.0021045	chr6	47412574	47412784	grm4
peak221546	19.8639	7.78251	1.73268	4.49159	7.06931e-06	0.0021045	chr6	47412574	47412784	lrig2
peak221554	528.261	0.750611	0.207151	3.62349	0.000290649	0.0371085	chr6	47443782	47444505	grm4
peak221554	528.261	0.750611	0.207151	3.62349	0.000290649	0.0371085	chr6	47443782	47444505	lrig2
peak221716	165.457	1.81628	0.374011	4.85621	1.19652e-06	0.000500175	chr6	48202530	48202878	phc2b
peak221716	165.457	1.81628	0.374011	4.85621	1.19652e-06	0.000500175	chr6	48202530	48202878	wnt2ba
peak221790	57.2034	2.94102	0.608961	4.82957	1.36828e-06	0.000557643	chr6	48531602	48532057	rhoae
peak221790	57.2034	2.94102	0.608961	4.82957	1.36828e-06	0.000557643	chr6	48531602	48532057	si:ch211-105j21.7
peak222007	81.9102	2.21127	0.497545	4.44436	8.81558e-06	0.00251473	chr6	49503721	49504253	ngf
peak222007	81.9102	2.21127	0.497545	4.44436	8.81558e-06	0.00251473	chr6	49503721	49504253	rplp2
peak222043	508.644	0.821524	0.210052	3.91106	9.18935e-05	0.0153655	chr6	49671066	49671630	stx16
peak222043	508.644	0.821524	0.210052	3.91106	9.18935e-05	0.0153655	chr6	49671066	49671630	vapb
peak22252	71.8839	2.03396	0.552229	3.68319	0.000230335	0.0314103	chr11	9700275	9700847	ect2
peak22252	71.8839	2.03396	0.552229	3.68319	0.000230335	0.0314103	chr11	9700275	9700847	nlgn1
peak223589	305.15	0.941102	0.260032	3.61918	0.00029554	0.0375206	chr6	56903066	56903830	ddx27
peak223589	305.15	0.941102	0.260032	3.61918	0.00029554	0.0375206	chr6	56903066	56903830	tfap2c
peak223593	82.9124	2.09616	0.486786	4.30612	1.66141e-05	0.00410286	chr6	56930334	56930729	ddx27
peak223593	82.9124	2.09616	0.486786	4.30612	1.66141e-05	0.00410286	chr6	56930334	56930729	tfap2c
peak223594	115.342	1.55081	0.434856	3.56625	0.000362129	0.0436968	chr6	56934023	56934436	ddx27
peak223594	115.342	1.55081	0.434856	3.56625	0.000362129	0.0436968	chr6	56934023	56934436	tfap2c
peak223691	22.5946	5.57868	1.38149	4.03817	5.38691e-05	0.0103412	chr6	57603247	57603639	cbfa2t2
peak223691	22.5946	5.57868	1.38149	4.03817	5.38691e-05	0.0103412	chr6	57603247	57603639	snrpb
peak223692	30.7114	3.00092	0.82852	3.62202	0.000292306	0.0372493	chr6	57603738	57604134	cbfa2t2
peak223692	30.7114	3.00092	0.82852	3.62202	0.000292306	0.0372493	chr6	57603738	57604134	snrpb
peak223703	48.9656	2.93976	0.656302	4.47928	7.48937e-06	0.00221684	chr6	57658913	57659179	cbfa2t2
peak223715	25.3864	6.67649	1.65077	4.04447	5.24421e-05	0.0101106	chr6	57696240	57696471	arfrp1
peak223715	25.3864	6.67649	1.65077	4.04447	5.24421e-05	0.0101106	chr6	57696240	57696471	cbfa2t2
peak223893	231.703	1.21801	0.30076	4.04976	5.12702e-05	0.00995983	chr6	58684651	58685065	soat2
peak223893	231.703	1.21801	0.30076	4.04976	5.12702e-05	0.00995983	chr6	58684651	58685065	sp7
peak224218	199.579	1.80462	0.364301	4.95366	7.28318e-07	0.000326584	chr6	59973558	59974628	aamp
peak224218	199.579	1.80462	0.364301	4.95366	7.28318e-07	0.000326584	chr6	59973558	59974628	kdm6al
peak224387	156.906	1.40402	0.354197	3.96395	7.37191e-05	0.0130718	chr7	493671	494053	nrxn2b
peak224387	156.906	1.40402	0.354197	3.96395	7.37191e-05	0.0130718	chr7	493671	494053	rela
peak224848	188.743	1.47583	0.36823	4.00791	6.12573e-05	0.0113574	chr7	5786330	5786588	si:ch211-113a14.10
peak224848	188.743	1.47583	0.36823	4.00791	6.12573e-05	0.0113574	chr7	5786330	5786588	si:ch211-113a14.29
peak224848	188.743	1.47583	0.36823	4.00791	6.12573e-05	0.0113574	chr7	5786330	5786588	zgc:114037
peak224876	140.758	1.33408	0.370848	3.59737	0.000321447	0.040045	chr7	5989140	5989496	si:ch211-113a14.10
peak224876	140.758	1.33408	0.370848	3.59737	0.000321447	0.040045	chr7	5989140	5989496	si:ch211-113a14.10
peak224913	135.504	2.62585	0.434383	6.045	1.49409e-09	1.66034e-06	chr7	6290433	6290679	si:ch211-113a14.10
peak224968	72.1226	2.01434	0.557404	3.61378	0.000301762	0.038021	chr7	6509207	6509567	pnp5a
peak224968	72.1226	2.01434	0.557404	3.61378	0.000301762	0.038021	chr7	6509207	6509567	zgc:110425
peak224976	61.1979	2.9057	0.614433	4.72907	2.25546e-06	0.000842454	chr7	6545308	6545597	zgc:76883
peak224994	28.4363	8.30132	1.65105	5.0279	4.95868e-07	0.000234704	chr7	6619767	6620019	sf3b2
peak224994	28.4363	8.30132	1.65105	5.0279	4.95868e-07	0.000234704	chr7	6619767	6620019	zgc:55262
peak225107	435.965	0.820997	0.224408	3.6585	0.000253698	0.0338374	chr7	7207849	7208549	pfdn2
peak225107	435.965	0.820997	0.224408	3.6585	0.000253698	0.0338374	chr7	7207849	7208549	six7
peak225449	388.599	1.04548	0.277125	3.77258	0.000161566	0.0237838	chr7	9173635	9174131	aldh1a3
peak225449	388.599	1.04548	0.277125	3.77258	0.000161566	0.0237838	chr7	9173635	9174131	chsy1
peak225811	346.565	1.04262	0.248716	4.192	2.76511e-05	0.00620145	chr7	11590470	11590921	mesdc2
peak225811	346.565	1.04262	0.248716	4.192	2.76511e-05	0.00620145	chr7	11590470	11590921	mex3b
peak225865	706.195	0.689974	0.187389	3.68204	0.00023138	0.0315288	chr7	11816351	11817022	mex3b
peak225973	201.274	1.26599	0.356042	3.55573	0.000376931	0.0448693	chr7	12247164	12248111	fam154b
peak225973	201.274	1.26599	0.356042	3.55573	0.000376931	0.0448693	chr7	12247164	12248111	zgc:158785
peak226299	145.382	2.4632	0.386817	6.36787	1.91671e-10	2.78804e-07	chr7	14026810	14027229	fes
peak226299	145.382	2.4632	0.386817	6.36787	1.91671e-10	2.78804e-07	chr7	14026810	14027229	rhcga
peak226798	416.153	1.33049	0.245592	5.41749	6.04414e-08	3.97569e-05	chr7	16493846	16494489	dbx1a
peak226798	416.153	1.33049	0.245592	5.41749	6.04414e-08	3.97569e-05	chr7	16493846	16494489	e2f8
peak227997	301.191	0.997673	0.261793	3.81092	0.00013845	0.0210456	chr7	21796963	21797610	nlgn2a
peak227997	301.191	0.997673	0.261793	3.81092	0.00013845	0.0210456	chr7	21796963	21797610	zgc:163003
peak228635	53.173	2.4249	0.615074	3.94245	8.06519e-05	0.0140232	chr7	24638987	24639379	mark2b
peak228635	53.173	2.4249	0.615074	3.94245	8.06519e-05	0.0140232	chr7	24638987	24639379	rcor2
peak228948	46.4305	3.9223	0.745386	5.26211	1.42411e-07	8.16652e-05	chr7	25822618	25822916	ache
peak228948	46.4305	3.9223	0.745386	5.26211	1.42411e-07	8.16652e-05	chr7	25822618	25822916	vgf
peak230296	41.0275	2.76621	0.721247	3.83532	0.000125403	0.0194931	chr7	31032142	31032581	ctdspl2b
peak230296	41.0275	2.76621	0.721247	3.83532	0.000125403	0.0194931	chr7	31032142	31032581	fam189a1
peak232494	341.798	0.892024	0.250901	3.55529	0.000377562	0.0449146	chr7	38901086	38901611	chrm4a
peak232494	341.798	0.892024	0.250901	3.55529	0.000377562	0.0449146	chr7	38901086	38901611	mdka
peak232511	37.0013	2.68615	0.757414	3.54648	0.000390416	0.0458041	chr7	38963585	38963928	chrm4a
peak232511	37.0013	2.68615	0.757414	3.54648	0.000390416	0.0458041	chr7	38963585	38963928	tnni2b.2
peak23306	518.069	0.805308	0.212002	3.79859	0.000145521	0.0218605	chr11	16147427	16147997	kbtbd8
peak23306	518.069	0.805308	0.212002	3.79859	0.000145521	0.0218605	chr11	16147427	16147997	slc25a26
peak233685	177.931	1.85738	0.338658	5.48455	4.14526e-08	2.81996e-05	chr7	44085386	44085954	cdh11
peak233685	177.931	1.85738	0.338658	5.48455	4.14526e-08	2.81996e-05	chr7	44085386	44085954	cdh5
peak233985	311.876	1.05194	0.275017	3.82502	0.000130763	0.0201105	chr7	45838548	45839381	ccne1
peak233985	311.876	1.05194	0.275017	3.82502	0.000130763	0.0201105	chr7	45838548	45839381	znf536
peak234106	200.312	1.38274	0.31626	4.37216	1.23021e-05	0.00319453	chr7	46213348	46213717	hel_dr4
peak234106	200.312	1.38274	0.31626	4.37216	1.23021e-05	0.00319453	chr7	46213348	46213717	znf536
peak234107	73.0753	3.22469	0.558109	5.77788	7.56476e-09	6.94076e-06	chr7	46213817	46214355	hel_dr4
peak234107	73.0753	3.22469	0.558109	5.77788	7.56476e-09	6.94076e-06	chr7	46213817	46214355	znf536
peak234156	171.203	1.2673	0.348191	3.63967	0.000272989	0.0354698	chr7	46395994	46396476	hel_dr4
peak234156	171.203	1.2673	0.348191	3.63967	0.000272989	0.0354698	chr7	46395994	46396476	znf536
peak235138	94.3882	2.52008	0.485216	5.19373	2.06118e-07	0.000108783	chr7	50985439	50985846	col4a5
peak235138	94.3882	2.52008	0.485216	5.19373	2.06118e-07	0.000108783	chr7	50985439	50985846	gc2
peak235552	307.794	0.961881	0.263291	3.65329	0.000258897	0.0342861	chr7	53138863	53139394	trip4
peak235552	307.794	0.961881	0.263291	3.65329	0.000258897	0.0342861	chr7	53138863	53139394	znf609
peak235559	244.201	1.109	0.295259	3.75602	0.000172634	0.025078	chr7	53174877	53175334	chrna7
peak235559	244.201	1.109	0.295259	3.75602	0.000172634	0.025078	chr7	53174877	53175334	znf609
peak237007	168.458	1.43193	0.342248	4.18389	2.8656e-05	0.00635315	chr7	60783568	60784095	pc
peak237007	168.458	1.43193	0.342248	4.18389	2.8656e-05	0.00635315	chr7	60783568	60784095	zgc:194930
peak237704	19.6227	5.15158	1.38921	3.70827	0.000208676	0.0291454	chr7	65173461	65173691	usp47
peak237927	385.015	0.947804	0.236817	4.00227	6.27371e-05	0.0115598	chr7	66157433	66157980	galnt18b
peak237927	385.015	0.947804	0.236817	4.00227	6.27371e-05	0.0115598	chr7	66157433	66157980	pth1b
peak238151	127.615	1.70998	0.397649	4.30024	1.70614e-05	0.00417584	chr7	67594480	67595151	dhx38
peak238151	127.615	1.70998	0.397649	4.30024	1.70614e-05	0.00417584	chr7	67594480	67595151	marveld3
peak239061	68.0758	2.48183	0.584426	4.24661	2.17028e-05	0.00508239	chr7	71572198	71572503	myl12.1
peak239174	153.955	1.8274	0.39971	4.57182	4.83514e-06	0.00155092	chr7	72128637	72128971	cbln8
peak239174	153.955	1.8274	0.39971	4.57182	4.83514e-06	0.00155092	chr7	72128637	72128971	ywhae2
peak239810	104.911	1.5538	0.437615	3.55061	0.000384345	0.0453296	chr8	658411	658993	rnf165b
peak239810	104.911	1.5538	0.437615	3.55061	0.000384345	0.0453296	chr8	658411	658993	smyd1b
peak240079	138.604	1.44318	0.374131	3.85742	0.000114589	0.018127	chr8	2211439	2211846	plat
peak240079	138.604	1.44318	0.374131	3.85742	0.000114589	0.018127	chr8	2211439	2211846	si:dkey-178e17.1
peak240175	363.117	1.03898	0.254057	4.08954	4.32232e-05	0.00880784	chr8	2630045	2630504	naif1
peak240175	363.117	1.03898	0.254057	4.08954	4.32232e-05	0.00880784	chr8	2630045	2630504	sh3glb2a
peak240186	35.2378	3.09448	0.810322	3.81882	0.000134091	0.0205401	chr8	2678703	2678939	naif1
peak240186	35.2378	3.09448	0.810322	3.81882	0.000134091	0.0205401	chr8	2678703	2678939	sh3glb2a
peak240234	242.635	1.37217	0.291434	4.70832	2.49766e-06	0.000904592	chr8	2872285	2872836	crb2b
peak240234	242.635	1.37217	0.291434	4.70832	2.49766e-06	0.000904592	chr8	2872285	2872836	lhx2b
peak240236	223.704	1.15142	0.302576	3.8054	0.000141578	0.0213939	chr8	2888362	2888908	crb2b
peak240236	223.704	1.15142	0.302576	3.8054	0.000141578	0.0213939	chr8	2888362	2888908	lhx2b
peak240293	830.869	0.699202	0.183365	3.81317	0.000137195	0.0209082	chr8	3081267	3082161	lhx2b
peak240293	830.869	0.699202	0.183365	3.81317	0.000137195	0.0209082	chr8	3081267	3082161	zgc:103510
peak241030	123.228	1.54941	0.401403	3.85998	0.000113397	0.0180373	chr8	7228613	7229083	abcd1
peak241030	123.228	1.54941	0.401403	3.85998	0.000113397	0.0180373	chr8	7228613	7229083	fgd1
peak241234	205.87	1.11084	0.313015	3.54884	0.000386926	0.045574	chr8	8067707	8068182	abcd1
peak241234	205.87	1.11084	0.313015	3.54884	0.000386926	0.045574	chr8	8067707	8068182	plxnb3
peak241442	203.036	1.47071	0.315189	4.66613	3.06925e-06	0.00107885	chr8	9155373	9155949	plxna3
peak241442	203.036	1.47071	0.315189	4.66613	3.06925e-06	0.00107885	chr8	9155373	9155949	pnck
peak241443	237.657	1.57489	0.338471	4.65294	3.27236e-06	0.00113684	chr8	9160346	9161002	plxna3
peak241443	237.657	1.57489	0.338471	4.65294	3.27236e-06	0.00113684	chr8	9160346	9161002	pnck
peak24173	94.3624	2.08356	0.530606	3.92675	8.61003e-05	0.0146683	chr11	20673654	20674039	cdh4
peak24173	94.3624	2.08356	0.530606	3.92675	8.61003e-05	0.0146683	chr11	20673654	20674039	tuba7l
peak241795	36.5839	4.53866	0.916452	4.95243	7.32935e-07	0.000327015	chr8	10613816	10614063	fxn
peak241795	36.5839	4.53866	0.916452	4.95243	7.32935e-07	0.000327015	chr8	10613816	10614063	pim1
peak242541	787.627	0.785862	0.177483	4.42781	9.51962e-06	0.00266125	chr8	14473591	14474519	lhx4
peak242541	787.627	0.785862	0.177483	4.42781	9.51962e-06	0.00266125	chr8	14473591	14474519	qsox1
peak242724	187.749	1.16125	0.323801	3.58632	0.000335378	0.0413252	chr8	15263815	15264381	gclm
peak242724	187.749	1.16125	0.323801	3.58632	0.000335378	0.0413252	chr8	15263815	15264381	spata6
peak242895	138.892	2.5842	0.390659	6.61499	3.71579e-11	6.27179e-08	chr8	15955649	15956014	agbl4
peak242898	64.575	2.1117	0.596412	3.54066	0.000399123	0.0464601	chr8	15973007	15973345	dmrta2
peak242898	64.575	2.1117	0.596412	3.54066	0.000399123	0.0464601	chr8	15973007	15973345	elavl4
peak242899	199.909	1.19617	0.322873	3.70475	0.000211597	0.0294384	chr8	15974114	15974842	dmrta2
peak242899	199.909	1.19617	0.322873	3.70475	0.000211597	0.0294384	chr8	15974114	15974842	elavl4
peak243423	91.7681	1.83486	0.51558	3.55883	0.000372512	0.0446403	chr8	18084667	18085020	glis1b
peak243423	91.7681	1.83486	0.51558	3.55883	0.000372512	0.0446403	chr8	18084667	18085020	rps8b
peak243464	314.245	1.25581	0.263106	4.773	1.81506e-06	0.000707496	chr8	18257021	18257596	guk1b
peak243464	314.245	1.25581	0.263106	4.773	1.81506e-06	0.000707496	chr8	18257021	18257596	rnf220b
peak244328	26.5175	3.2996	0.91772	3.59543	0.000323859	0.0401698	chr8	21855180	21855423	si:dkey-231p15.1
peak244328	26.5175	3.2996	0.91772	3.59543	0.000323859	0.0401698	chr8	21855180	21855423	si:dkey-24f17.5
peak244419	48.1951	2.43922	0.655306	3.72226	0.000197444	0.0279035	chr8	22328070	22328366	lrrc47
peak244419	48.1951	2.43922	0.655306	3.72226	0.000197444	0.0279035	chr8	22328070	22328366	zgc:153631
peak244670	29.1745	3.79544	0.909492	4.17314	3.00431e-05	0.00658721	chr8	23381916	23382303	gpr173
peak244670	29.1745	3.79544	0.909492	4.17314	3.00431e-05	0.00658721	chr8	23381916	23382303	suv39h1a
peak244769	17.3833	5.34875	1.48769	3.59533	0.00032398	0.0401698	chr8	23771212	23771465	mapk14a
peak244769	17.3833	5.34875	1.48769	3.59533	0.00032398	0.0401698	chr8	23771212	23771465	si:ch211-163l21.8
peak244770	32.2117	6.11451	1.28532	4.75718	1.96313e-06	0.000752266	chr8	23771498	23771733	mapk14a
peak244770	32.2117	6.11451	1.28532	4.75718	1.96313e-06	0.000752266	chr8	23771498	23771733	si:ch211-163l21.8
peak244864	113.178	1.54761	0.430296	3.5966	0.000322399	0.040045	chr8	24269704	24270250	mmp9
peak244864	113.178	1.54761	0.430296	3.5966	0.000322399	0.040045	chr8	24269704	24270250	prok1
peak245017	30.0419	5.986	1.30941	4.57154	4.84162e-06	0.00155092	chr8	25311672	25311904	eps8l3
peak245301	684.706	1.17804	0.192	6.13563	8.48224e-10	1.01852e-06	chr8	26451571	26452505	sema3bl
peak245301	684.706	1.17804	0.192	6.13563	8.48224e-10	1.01852e-06	chr8	26451571	26452505	zgc:136971
peak246732	249.642	1.00327	0.283864	3.53432	0.000408828	0.0472821	chr8	33423628	33424304	gapvd1
peak246732	249.642	1.00327	0.283864	3.53432	0.000408828	0.0472821	chr8	33423628	33424304	lmx1bb
peak247865	27.7598	3.36777	0.893979	3.76717	0.000165107	0.0241675	chr8	41691689	41691938	gfra2a
peak247865	27.7598	3.36777	0.893979	3.76717	0.000165107	0.0241675	chr8	41691689	41691938	si:ch211-158d24.4
peak247956	37.4096	3.26237	0.824554	3.95652	7.60482e-05	0.0133878	chr8	42402903	42403157	dok2
peak247956	37.4096	3.26237	0.824554	3.95652	7.60482e-05	0.0133878	chr8	42402903	42403157	gfra2a
peak247966	111.773	1.75754	0.419539	4.18921	2.79927e-05	0.00626824	chr8	42514852	42515428	dok2
peak247966	111.773	1.75754	0.419539	4.18921	2.79927e-05	0.00626824	chr8	42514852	42515428	gfra2a
peak248410	62.0863	4.33003	0.671065	6.45247	1.10041e-10	1.66847e-07	chr8	44884704	44885006	praf2
peak248410	62.0863	4.33003	0.671065	6.45247	1.10041e-10	1.66847e-07	chr8	44884704	44885006	si:ch73-289n4.1
peak248421	16.0551	7.47654	1.79462	4.16609	3.0987e-05	0.00673933	chr8	44977094	44977412	si:ch211-227i14.2
peak248421	16.0551	7.47654	1.79462	4.16609	3.0987e-05	0.00673933	chr8	44977094	44977412	zgc:154046
peak248524	92.8027	2.06064	0.463832	4.44265	8.88591e-06	0.00252671	chr8	45807526	45808112	ogdha
peak248524	92.8027	2.06064	0.463832	4.44265	8.88591e-06	0.00252671	chr8	45807526	45808112	ppiaa
peak248636	91.8778	6.97769	1.95759	3.56443	0.000364642	0.0439031	chr8	46866715	46867144	acot7
peak248636	91.8778	6.97769	1.95759	3.56443	0.000364642	0.0439031	chr8	46866715	46867144	gpr153
peak248746	195.43	1.1726	0.322109	3.64039	0.000272228	0.0354306	chr8	47415597	47416219	plch2a
peak248746	195.43	1.1726	0.322109	3.64039	0.000272228	0.0354306	chr8	47415597	47416219	si:ch211-251b21.1
peak2491	583.476	0.737625	0.207138	3.56104	0.000369389	0.0443255	chr1	12616296	12616860	elf2b
peak2491	583.476	0.737625	0.207138	3.56104	0.000369389	0.0443255	chr1	12616296	12616860	pcdh18a
peak249123	38.2622	4.00089	0.838211	4.77313	1.81389e-06	0.000707496	chr8	49205401	49205670	fkbp1aa
peak249123	38.2622	4.00089	0.838211	4.77313	1.81389e-06	0.000707496	chr8	49205401	49205670	zgc:171501
peak249124	33.2303	4.70183	0.965507	4.86981	1.11706e-06	0.000472243	chr8	49206215	49206466	fkbp1aa
peak249124	33.2303	4.70183	0.965507	4.86981	1.11706e-06	0.000472243	chr8	49206215	49206466	zgc:171501
peak249535	136.607	1.59299	0.389447	4.09039	4.30657e-05	0.00879578	chr8	51547163	51547654	fgfr1a
peak249535	136.607	1.59299	0.389447	4.09039	4.30657e-05	0.00879578	chr8	51547163	51547654	zgc:113115
peak249719	52.7913	2.52955	0.617923	4.09363	4.24664e-05	0.00871219	chr8	52365377	52365837	arid5a
peak249719	52.7913	2.52955	0.617923	4.09363	4.24664e-05	0.00871219	chr8	52365377	52365837	dbnlb
peak249784	133.43	1.51045	0.381422	3.96004	7.49362e-05	0.0132352	chr8	52677584	52678370	si:dkey-90l8.3
peak249784	133.43	1.51045	0.381422	3.96004	7.49362e-05	0.0132352	chr8	52677584	52678370	tubb4b
peak249790	90.8238	1.72206	0.4719	3.64921	0.000263043	0.0347068	chr8	52702294	52702702	si:dkey-90l8.3
peak249790	90.8238	1.72206	0.4719	3.64921	0.000263043	0.0347068	chr8	52702294	52702702	tubb4b
peak249873	214.88	1.23573	0.304605	4.05682	4.97453e-05	0.00978042	chr8	52986724	52987190	NA
peak249970	50.6283	2.30268	0.62737	3.67037	0.000242201	0.0327045	chr8	53400089	53400547	gabrd
peak249970	50.6283	2.30268	0.62737	3.67037	0.000242201	0.0327045	chr8	53400089	53400547	gnb1a
peak250006	58.7056	2.06789	0.574973	3.5965	0.000322526	0.040045	chr8	53555256	53555553	actr8
peak250082	89.7175	4.06143	0.545921	7.4396	1.0099e-13	2.61864e-10	chr8	53884235	53884600	tlr9
peak250082	89.7175	4.06143	0.545921	7.4396	1.0099e-13	2.61864e-10	chr8	53884235	53884600	wnt5a
peak250502	812.34	0.933438	0.177911	5.24666	1.5488e-07	8.74141e-05	chr9	1315698	1316261	casp8l2
peak250502	812.34	0.933438	0.177911	5.24666	1.5488e-07	8.74141e-05	chr9	1315698	1316261	gpr1
peak250507	1002.01	0.754043	0.166121	4.53912	5.64882e-06	0.00175767	chr9	1328723	1329551	casp8l2
peak250507	1002.01	0.754043	0.166121	4.53912	5.64882e-06	0.00175767	chr9	1328723	1329551	gpr1
peak252164	99.3829	2.11723	0.448677	4.71883	2.37205e-06	0.000866111	chr9	9281849	9282333	si:ch211-214p13.3
peak252164	99.3829	2.11723	0.448677	4.71883	2.37205e-06	0.000866111	chr9	9281849	9282333	u2af1
peak252352	368.955	0.956678	0.248001	3.85756	0.000114525	0.018127	chr9	10304047	10304630	cxcr4b
peak252352	368.955	0.956678	0.248001	3.85756	0.000114525	0.018127	chr9	10304047	10304630	hnmt
peak252805	127.669	2.61897	0.414418	6.31962	2.62204e-10	3.69388e-07	chr9	12606162	12606537	igf2bp2a
peak252812	61.0588	2.71042	0.583687	4.64362	3.42357e-06	0.00117343	chr9	12633597	12633949	sumo3b
peak252812	61.0588	2.71042	0.583687	4.64362	3.42357e-06	0.00117343	chr9	12633597	12633949	tra2b
peak253024	55.2414	3.98353	0.694577	5.73518	9.74085e-09	8.54306e-06	chr9	13453035	13453422	als2a
peak253024	55.2414	3.98353	0.694577	5.73518	9.74085e-09	8.54306e-06	chr9	13453035	13453422	fzd7a
peak253026	66.5389	1.95083	0.541991	3.59938	0.000318978	0.0397701	chr9	13455910	13456250	als2a
peak253026	66.5389	1.95083	0.541991	3.59938	0.000318978	0.0397701	chr9	13455910	13456250	fzd7a
peak254211	96.7366	1.70528	0.481711	3.54006	0.000400036	0.0464756	chr9	19987334	19987678	si:ch211-141e20.2
peak254211	96.7366	1.70528	0.481711	3.54006	0.000400036	0.0464756	chr9	19987334	19987678	si:dkey-174k18.1
peak254760	55.8758	2.51657	0.606917	4.14649	3.37613e-05	0.00722536	chr9	22437746	22438411	crygm2d3
peak254960	279.827	1.14161	0.273195	4.17874	2.93125e-05	0.00645867	chr9	23329527	23329958	lypd6
peak254960	279.827	1.14161	0.273195	4.17874	2.93125e-05	0.00645867	chr9	23329527	23329958	lypd6b
peak255790	65.0381	2.17121	0.57125	3.8008	0.00014423	0.0217212	chr9	26793243	26793998	efnb2a
peak255790	65.0381	2.17121	0.57125	3.8008	0.00014423	0.0217212	chr9	26793243	26793998	slc10a2
peak255947	497.658	0.93077	0.219132	4.24753	2.16139e-05	0.00507488	chr9	27513477	27514183	slc10a2
peak256456	427.442	0.826353	0.231383	3.57136	0.000355133	0.043077	chr9	30017673	30018502	cmss1
peak256456	427.442	0.826353	0.231383	3.57136	0.000355133	0.043077	chr9	30017673	30018502	rnaseh2b
peak256468	233.519	1.17449	0.298711	3.93185	8.42949e-05	0.0145016	chr9	30071986	30072432	cmss1
peak256468	233.519	1.17449	0.298711	3.93185	8.42949e-05	0.0145016	chr9	30071986	30072432	rnaseh2b
peak256525	88.6354	1.85365	0.468517	3.95642	7.60818e-05	0.0133878	chr9	30354607	30354990	jagn1a
peak256525	88.6354	1.85365	0.468517	3.95642	7.60818e-05	0.0133878	chr9	30354607	30354990	si:dkey-100n23.2
peak257154	303.913	1.00246	0.270354	3.70796	0.000208937	0.0291591	chr9	32928205	32928845	olig1
peak257154	303.913	1.00246	0.270354	3.70796	0.000208937	0.0291591	chr9	32928205	32928845	olig2
peak257181	169.826	2.28273	0.435413	5.24268	1.58263e-07	8.79369e-05	chr9	33014011	33014762	mxc
peak257181	169.826	2.28273	0.435413	5.24268	1.58263e-07	8.79369e-05	chr9	33014011	33014762	mxe
peak257296	147.728	1.36149	0.362445	3.7564	0.000172373	0.0250733	chr9	33444055	33444510	si:dkey-216e24.3
peak257296	147.728	1.36149	0.362445	3.7564	0.000172373	0.0250733	chr9	33444055	33444510	usp9
peak257754	34.1221	3.82285	0.883456	4.32715	1.51051e-05	0.00382254	chr9	35170771	35171124	si:ch211-160b11.4
peak257754	34.1221	3.82285	0.883456	4.32715	1.51051e-05	0.00382254	chr9	35170771	35171124	zgc:172067
peak257876	218.739	1.12065	0.309283	3.62337	0.000290786	0.0371085	chr9	35786884	35787652	ncam2
peak257876	218.739	1.12065	0.309283	3.62337	0.000290786	0.0371085	chr9	35786884	35787652	rcan1a
peak257958	70.7194	2.36916	0.566794	4.17994	2.91586e-05	0.00643269	chr9	36240822	36241258	atp1a1b
peak257958	70.7194	2.36916	0.566794	4.17994	2.91586e-05	0.00643269	chr9	36240822	36241258	lrp1bb
peak258786	577.781	0.802923	0.201498	3.98476	6.75478e-05	0.0122305	chr9	40038660	40039265	NA
peak258917	74.9909	2.7365	0.530427	5.15904	2.48213e-07	0.000127612	chr9	40831899	40832363	abca12
peak258917	74.9909	2.7365	0.530427	5.15904	2.48213e-07	0.000127612	chr9	40831899	40832363	vwc2l
peak259197	146.132	1.32716	0.364994	3.63611	0.000276789	0.0357815	chr9	42184196	42184507	col18a1
peak259197	146.132	1.32716	0.364994	3.63611	0.000276789	0.0357815	chr9	42184196	42184507	pcbp3
peak260239	184.394	1.26289	0.330141	3.8253	0.000130615	0.0201105	chr9	47007566	47008132	igfbp2b
peak260239	184.394	1.26289	0.330141	3.8253	0.000130615	0.0201105	chr9	47007566	47008132	igfbp5b
peak260488	162.856	1.57746	0.360686	4.37348	1.2228e-05	0.00318454	chr9	48038909	48039333	igfbp5b
peak260488	162.856	1.57746	0.360686	4.37348	1.2228e-05	0.00318454	chr9	48038909	48039333	tns1
peak260636	465.471	0.795672	0.216937	3.66776	0.000244681	0.0329398	chr9	48735710	48736183	lrp2a
peak260636	465.471	0.795672	0.216937	3.66776	0.000244681	0.0329398	chr9	48735710	48736183	zgc:172182
peak260656	250.707	1.03106	0.285599	3.61016	0.000306003	0.0384469	chr9	48867186	48867673	lrp2a
peak260656	250.707	1.03106	0.285599	3.61016	0.000306003	0.0384469	chr9	48867186	48867673	rdh1
peak260793	58.8232	4.51815	0.706986	6.39073	1.65099e-10	2.4212e-07	chr9	49955706	49955986	scn1a
peak260793	58.8232	4.51815	0.706986	6.39073	1.65099e-10	2.4212e-07	chr9	49955706	49955986	xirp2b
peak260846	143.83	3.87228	0.427462	9.05878	1.31923e-19	8.42962e-16	chr9	50304151	50304483	scn1a
peak260846	143.83	3.87228	0.427462	9.05878	1.31923e-19	8.42962e-16	chr9	50304151	50304483	slc38a11
peak260847	46.0662	2.75331	0.670158	4.10845	3.98315e-05	0.00828658	chr9	50304751	50304972	scn1a
peak260847	46.0662	2.75331	0.670158	4.10845	3.98315e-05	0.00828658	chr9	50304751	50304972	slc38a11
peak260918	405.835	0.923917	0.229924	4.01837	5.86032e-05	0.0109906	chr9	50606606	50606984	fign
peak260918	405.835	0.923917	0.229924	4.01837	5.86032e-05	0.0109906	chr9	50606606	50606984	slc38a11
peak261046	405.372	0.933361	0.233885	3.99069	6.58825e-05	0.0120402	chr9	51432113	51432855	fign
peak261046	405.372	0.933361	0.233885	3.99069	6.58825e-05	0.0120402	chr9	51432113	51432855	ifih1
peak261146	570.684	0.841264	0.209679	4.01216	6.01668e-05	0.0112191	chr9	52100667	52101328	tank
peak261146	570.684	0.841264	0.209679	4.01216	6.01668e-05	0.0112191	chr9	52100667	52101328	xrcc5
peak261331	81.6819	2.13765	0.540145	3.95754	7.5724e-05	0.0133611	chr9	53198349	53198757	si:ch211-45c16.2
peak261331	81.6819	2.13765	0.540145	3.95754	7.5724e-05	0.0133611	chr9	53198349	53198757	xrcc5
peak261381	79.5913	4.13033	0.670968	6.15578	7.47087e-10	9.15514e-07	chr9	53424803	53425462	il1rl1
peak261381	79.5913	4.13033	0.670968	6.15578	7.47087e-10	9.15514e-07	chr9	53424803	53425462	sox21b
peak261417	1059.27	0.686294	0.162966	4.21127	2.5394e-05	0.00578036	chr9	53566088	53566704	il1rl1
peak261417	1059.27	0.686294	0.162966	4.21127	2.5394e-05	0.00578036	chr9	53566088	53566704	sox21b
peak261467	1256.67	0.572778	0.152939	3.74514	0.000180297	0.0259725	chr9	53741215	53742192	dct
peak261467	1256.67	0.572778	0.152939	3.74514	0.000180297	0.0259725	chr9	53741215	53742192	sox21b
peak261493	214.329	1.57659	0.370546	4.25477	2.09259e-05	0.00493727	chr9	53832643	53833304	dct
peak261493	214.329	1.57659	0.370546	4.25477	2.09259e-05	0.00493727	chr9	53832643	53833304	pcdh8
peak261547	72.4481	2.00705	0.528009	3.80117	0.000144012	0.0217067	chr9	54185379	54185968	lect1
peak261547	72.4481	2.00705	0.528009	3.80117	0.000144012	0.0217067	chr9	54185379	54185968	si:ch211-199f5.1
peak261589	129.324	2.10071	0.399435	5.25922	1.44669e-07	8.24312e-05	chr9	54432287	54432766	mid1
peak261589	129.324	2.10071	0.399435	5.25922	1.44669e-07	8.24312e-05	chr9	54432287	54432766	tlr7
peak261642	516.344	0.97521	0.215194	4.53177	5.8491e-06	0.00179501	chr9	54675771	54676380	egfl6
peak261642	516.344	0.97521	0.215194	4.53177	5.8491e-06	0.00179501	chr9	54675771	54676380	zgc:195154
peak261644	135.521	1.5516	0.380934	4.07313	4.63855e-05	0.00930388	chr9	54680683	54681007	egfl6
peak261644	135.521	1.5516	0.380934	4.07313	4.63855e-05	0.00930388	chr9	54680683	54681007	zgc:195154
peak261650	20.8711	5.4635	1.40559	3.88697	0.000101503	0.0165109	chr9	54695201	54695426	egfl6
peak261650	20.8711	5.4635	1.40559	3.88697	0.000101503	0.0165109	chr9	54695201	54695426	larsa
peak261718	622.379	0.830019	0.196413	4.22588	2.38004e-05	0.00550873	chr9	55194127	55194937	gpm6bb
peak261718	622.379	0.830019	0.196413	4.22588	2.38004e-05	0.00550873	chr9	55194127	55194937	ofd1
peak261723	629.403	1.02271	0.202114	5.06004	4.19173e-07	0.00020435	chr9	55208154	55208710	gpm6bb
peak261723	629.403	1.02271	0.202114	5.06004	4.19173e-07	0.00020435	chr9	55208154	55208710	ofd1
peak261822	129.4	1.3903	0.386501	3.59715	0.000321725	0.040045	chr9	55654263	55654731	gpr143
peak261822	129.4	1.3903	0.386501	3.59715	0.000321725	0.040045	chr9	55654263	55654731	nlgn4b
peak262003	185.673	1.39216	0.327641	4.24905	2.14676e-05	0.00504714	chr9	56708601	56709121	lcp1
peak262069	59287.3	0.545608	0.102858	5.3045	1.12982e-07	6.70588e-05	chrM	68	2360	mt-nd1
peak262069	59287.3	0.545608	0.102858	5.3045	1.12982e-07	6.70588e-05	chrM	68	2360	mt-nd2
peak262070	4077.57	0.630413	0.128508	4.90563	9.31296e-07	0.00040247	chrM	2377	2566	mt-co1
peak262070	4077.57	0.630413	0.128508	4.90563	9.31296e-07	0.00040247	chrM	2377	2566	mt-nd1
peak262070	4077.57	0.630413	0.128508	4.90563	9.31296e-07	0.00040247	chrM	2377	2566	mt-nd2
peak262071	4477.63	0.505979	0.121006	4.18146	2.89648e-05	0.00640077	chrM	2606	2766	mt-co1
peak262071	4477.63	0.505979	0.121006	4.18146	2.89648e-05	0.00640077	chrM	2606	2766	mt-nd1
peak262071	4477.63	0.505979	0.121006	4.18146	2.89648e-05	0.00640077	chrM	2606	2766	mt-nd2
peak262072	5963.14	0.532635	0.112522	4.73362	2.2055e-06	0.000827247	chrM	2781	2985	mt-co1
peak262072	5963.14	0.532635	0.112522	4.73362	2.2055e-06	0.000827247	chrM	2781	2985	mt-nd1
peak262072	5963.14	0.532635	0.112522	4.73362	2.2055e-06	0.000827247	chrM	2781	2985	mt-nd2
peak262073	6761.09	0.535645	0.115917	4.62092	3.82044e-06	0.00128243	chrM	3003	3234	mt-co1
peak262073	6761.09	0.535645	0.115917	4.62092	3.82044e-06	0.00128243	chrM	3003	3234	mt-nd1
peak262073	6761.09	0.535645	0.115917	4.62092	3.82044e-06	0.00128243	chrM	3003	3234	mt-nd2
peak262074	77528.1	0.537713	0.103156	5.21261	1.86199e-07	9.97417e-05	chrM	13690	16509	mt-cyb
peak262074	77528.1	0.537713	0.103156	5.21261	1.86199e-07	9.97417e-05	chrM	13690	16509	mt-nd6
peak262165	17.1993	5.25884	1.47455	3.5664	0.000361921	0.0436968	chrUn_KN149695v1	132374	132597	NA
peak262166	25.0381	6.66647	1.65479	4.02859	5.61117e-05	0.0106461	chrUn_KN149695v1	147568	147789	NA
peak262215	120.686	1.99297	0.478636	4.16385	3.1293e-05	0.00677819	chrUn_KN149704v1	11440	11929	sox4b
peak262499	475.701	0.908626	0.218589	4.15677	3.22778e-05	0.00694108	chrUn_KN149759v1	26925	27409	dock1
peak262499	475.701	0.908626	0.218589	4.15677	3.22778e-05	0.00694108	chrUn_KN149759v1	26925	27409	zgc:111868
peak262597	570.854	0.921997	0.213292	4.32269	1.54136e-05	0.00388411	chrUn_KN149790v1	814	1659	zgc:171422
peak262725	82.79	3.84852	0.550479	6.99123	2.72491e-12	5.73561e-09	chrUn_KN149825v1	19646	20357	NA
peak262969	23.2325	5.69017	1.37718	4.13176	3.59992e-05	0.00762224	chrUn_KN149889v1	6715	7010	NA
peak263063	131.37	2.6706	0.499582	5.34567	9.00842e-08	5.67669e-05	chrUn_KN149909v1	33275	33594	NA
peak263142	17.7783	4.57419	1.28704	3.55406	0.000379339	0.0450361	chrUn_KN149930v1	38620	38913	atoh1b
peak263142	17.7783	4.57419	1.28704	3.55406	0.000379339	0.0450361	chrUn_KN149930v1	38620	38913	dctn4
peak263476	14.1497	7.29328	1.83693	3.97037	7.17625e-05	0.0128522	chrUn_KN149989v1	247	474	NA
peak263568	28.7863	4.86543	1.093	4.45146	8.52867e-06	0.00244929	chrUn_KN150010v1	6622	6923	NA
peak263847	17.5632	5.32289	1.47327	3.61299	0.00030269	0.0380843	chrUn_KN150061v1	15807	16037	NA
peak263860	92.8646	2.88589	0.480289	6.00864	1.87086e-09	2.041e-06	chrUn_KN150065v1	604	893	tmem30ab
peak263969	66.8518	2.65201	0.63245	4.19323	2.75004e-05	0.00618121	chrUn_KN150092v1	6817	7148	NA
peak264197	530.721	0.777657	0.20637	3.76826	0.000164389	0.0241218	chrUn_KN150129v1	21957	22432	NA
peak26424	61.1469	6.99822	1.16764	5.99345	2.05438e-09	2.18786e-06	chr11	30066055	30066381	cflara
peak26424	61.1469	6.99822	1.16764	5.99345	2.05438e-09	2.18786e-06	chr11	30066055	30066381	ugt1b4
peak264267	781.537	0.889406	0.188244	4.72474	2.30411e-06	0.000851734	chrUn_KN150136v1	35892	36492	NA
peak264306	33.7286	3.56111	0.831205	4.28428	1.83335e-05	0.00442663	chrUn_KN150151v1	7114	7437	NA
peak264520	45.4146	3.01604	0.743864	4.05456	5.02287e-05	0.00982335	chrUn_KN150196v1	1464	1839	gab1
peak264520	45.4146	3.01604	0.743864	4.05456	5.02287e-05	0.00982335	chrUn_KN150196v1	1464	1839	zgc:172122
peak264632	266.869	6.91647	0.930081	7.43641	1.03457e-13	2.6443e-10	chrUn_KN150210v1	1742	2324	NA
peak264923	20.6817	7.84017	1.72224	4.55231	5.3061e-06	0.00167432	chrUn_KN150290v1	703	1070	NA
peak264937	181.209	1.47329	0.338897	4.34733	1.37807e-05	0.00352728	chrUn_KN150299v1	12799	13313	NA
peak265189	148.151	1.34522	0.361819	3.71794	0.000200856	0.0282962	chrUn_KN150363v1	13840	14129	NA
peak265495	31.0779	4.38879	1.08354	4.05043	5.11228e-05	0.00994663	chrUn_KN150438v1	7421	7660	NA
peak265636	90.5953	7.60268	1.14819	6.62144	3.55708e-11	6.0611e-08	chrUn_KN150463v1	8284	8877	NA
peak26574	131.152	1.59187	0.397616	4.00354	6.24014e-05	0.0115098	chr11	30917983	30918251	cacna1ab
peak26574	131.152	1.59187	0.397616	4.00354	6.24014e-05	0.0115098	chr11	30917983	30918251	trmt1
peak265992	192.367	1.15808	0.32546	3.55828	0.000373292	0.044674	chrUn_KN150557v1	39285	39815	NA
peak266066	34.9779	6.22205	1.26727	4.90982	9.11595e-07	0.00039491	chrUn_KN150572v1	24898	25116	NA
peak266261	648.881	0.695934	0.194833	3.57195	0.000354328	0.043077	chrUn_KN150617v1	27937	28865	fzd4
peak266261	648.881	0.695934	0.194833	3.57195	0.000354328	0.043077	chrUn_KN150617v1	27937	28865	psmd2
peak266395	326.51	1.04986	0.282781	3.71262	0.000205125	0.0287392	chrUn_KN150638v1	18903	19608	NA
peak266421	69.2833	2.72527	0.587133	4.64166	3.45618e-06	0.00118234	chrUn_KN150641v1	13657	13906	caln2
peak266421	69.2833	2.72527	0.587133	4.64166	3.45618e-06	0.00118234	chrUn_KN150641v1	13657	13906	wbscr27
peak266599	25.2763	5.79617	1.35305	4.28379	1.83739e-05	0.0044304	chrUn_KN150671v1	12191	12431	NA
peak266845	420.064	1.18672	0.227878	5.20768	1.91216e-07	0.000102124	chrUn_KN150708v1	31212	31857	arsg
peak266845	420.064	1.18672	0.227878	5.20768	1.91216e-07	0.000102124	chrUn_KN150708v1	31212	31857	slc16a6a
peak26744	309.801	0.920194	0.25805	3.56596	0.000362529	0.0437075	chr11	31485210	31485914	diaph3
peak26744	309.801	0.920194	0.25805	3.56596	0.000362529	0.0437075	chr11	31485210	31485914	zgc:162816
peak26794	29.3933	4.62783	1.06746	4.33536	1.45523e-05	0.00370886	chr11	31688957	31689263	diaph3
peak26794	29.3933	4.62783	1.06746	4.33536	1.45523e-05	0.00370886	chr11	31688957	31689263	diaph3
peak26856	212.123	1.15676	0.30602	3.78001	0.00015682	0.0232072	chr11	31898406	31899117	diaph3
peak26856	212.123	1.15676	0.30602	3.78001	0.00015682	0.0232072	chr11	31898406	31899117	zgc:162816
peak26893	62.8683	2.05015	0.563108	3.64079	0.000271806	0.0354306	chr11	32095791	32096293	diaph3
peak26893	62.8683	2.05015	0.563108	3.64079	0.000271806	0.0354306	chr11	32095791	32096293	pcdh17
peak27483	88.7327	2.21292	0.497539	4.44773	8.67839e-06	0.00248431	chr11	34888772	34889308	chchd4
peak27483	88.7327	2.21292	0.497539	4.44773	8.67839e-06	0.00248431	chr11	34888772	34889308	traip
peak27494	20.0691	5.24821	1.42438	3.68457	0.000229093	0.0312887	chr11	34947159	34947402	mst1rb
peak27497	19.6677	4.25152	1.16554	3.6477	0.0002646	0.0348351	chr11	34981788	34982016	camkvb
peak27497	19.6677	4.25152	1.16554	3.6477	0.0002646	0.0348351	chr11	34981788	34982016	mst1rb
peak27796	28.1194	8.28448	1.65325	5.01104	5.41374e-07	0.00025293	chr11	36388520	36388752	cacna1da
peak27796	28.1194	8.28448	1.65325	5.01104	5.41374e-07	0.00025293	chr11	36388520	36388752	usp48
peak27800	28.5952	6.01752	1.32325	4.54753	5.42799e-06	0.00170471	chr11	36425807	36426142	cacna1da
peak27800	28.5952	6.01752	1.32325	4.54753	5.42799e-06	0.00170471	chr11	36425807	36426142	usp48
peak27997	1065.87	0.612425	0.167444	3.65749	0.000254697	0.0339056	chr11	37480000	37480896	etnk2
peak27997	1065.87	0.612425	0.167444	3.65749	0.000254697	0.0339056	chr11	37480000	37480896	snrpe
peak28416	114.637	3.43856	0.461397	7.4525	9.15866e-14	2.40974e-10	chr11	39587724	39588507	vamp3
peak28416	114.637	3.43856	0.461397	7.4525	9.15866e-14	2.40974e-10	chr11	39587724	39588507	wnt4a
peak28763	22.0467	5.38837	1.38615	3.88728	0.000101373	0.0165109	chr11	41121368	41121608	akr7a3
peak28763	22.0467	5.38837	1.38615	3.88728	0.000101373	0.0165109	chr11	41121368	41121608	park7
peak28854	348.256	1.25135	0.246805	5.07019	3.97427e-07	0.00019481	chr11	41435427	41435838	dennd6aa
peak28854	348.256	1.25135	0.246805	5.07019	3.97427e-07	0.00019481	chr11	41435427	41435838	her15.1
peak29370	154.005	3.23017	0.390401	8.27399	1.29547e-16	5.26769e-13	chr11	43709366	43709699	gli2b
peak29370	154.005	3.23017	0.390401	8.27399	1.29547e-16	5.26769e-13	chr11	43709366	43709699	zgc:153764
peak29458	205.486	1.84587	0.320075	5.76699	8.07006e-09	7.32921e-06	chr11	44034456	44034923	il1rapl1b
peak29458	205.486	1.84587	0.320075	5.76699	8.07006e-09	7.32921e-06	chr11	44034456	44034923	zgc:158292
peak29685	143.032	2.17905	0.38172	5.70849	1.1398e-08	9.35443e-06	chr11	44879135	44880060	zgc:110298
peak29685	143.032	2.17905	0.38172	5.70849	1.1398e-08	9.35443e-06	chr11	44879135	44880060	zgc:171772
peak29903	258.674	1.41163	0.317643	4.44408	8.82682e-06	0.00251473	chr12	551913	552458	bsk146
peak30677	270.176	1.10165	0.300893	3.66126	0.000250978	0.033594	chr12	4345740	4346347	ca15c
peak30677	270.176	1.10165	0.300893	3.66126	0.000250978	0.033594	chr12	4345740	4346347	si:ch211-173d10.3
peak32764	34.8254	5.02102	1.0224	4.91103	9.06013e-07	0.000393445	chr12	17649431	17649666	NA
peak3431	388.797	1.24725	0.270476	4.61131	4.00144e-06	0.00131813	chr1	18142555	18143426	zgc:195282
peak3431	388.797	1.24725	0.270476	4.61131	4.00144e-06	0.00131813	chr1	18142555	18143426	zgc:73228
peak3518	68.5345	2.66417	0.550633	4.83838	1.30904e-06	0.000539648	chr1	18522218	18522552	ptpn9b
peak3518	68.5345	2.66417	0.550633	4.83838	1.30904e-06	0.000539648	chr1	18522218	18522552	ptprdb
peak35579	340.042	1.09626	0.252142	4.34778	1.37523e-05	0.00352505	chr12	31283496	31283994	tcf7l2
peak35579	340.042	1.09626	0.252142	4.34778	1.37523e-05	0.00352505	chr12	31283496	31283994	vti1a
peak35613	27.6912	5.48385	1.24235	4.41409	1.01437e-05	0.00280939	chr12	31445680	31446005	cpn1
peak35613	27.6912	5.48385	1.24235	4.41409	1.01437e-05	0.00280939	chr12	31445680	31446005	tectb
peak36004	66.2625	3.16046	0.588331	5.3719	7.79095e-08	4.96056e-05	chr12	33181243	33181587	c1qtnf1
peak36004	66.2625	3.16046	0.588331	5.3719	7.79095e-08	4.96056e-05	chr12	33181243	33181587	enpp7
peak36005	25.8713	5.74689	1.34956	4.25835	2.0594e-05	0.00487534	chr12	33181640	33181881	c1qtnf1
peak36005	25.8713	5.74689	1.34956	4.25835	2.0594e-05	0.00487534	chr12	33181640	33181881	enpp7
peak36440	26.0547	3.45396	0.951064	3.63168	0.00028158	0.0362438	chr12	34871520	34871774	qki2
peak36440	26.0547	3.45396	0.951064	3.63168	0.00028158	0.0362438	chr12	34871520	34871774	timm23
peak36602	78.2556	2.17819	0.536536	4.05974	4.91274e-05	0.00970158	chr12	35484270	35484894	chmp6b
peak36602	78.2556	2.17819	0.536536	4.05974	4.91274e-05	0.00970158	chr12	35484270	35484894	sec24c
peak36649	76.7323	3.07551	0.537233	5.72472	1.03602e-08	8.75645e-06	chr12	35723008	35723384	kcnj2
peak36649	76.7323	3.07551	0.537233	5.72472	1.03602e-08	8.75645e-06	chr12	35723008	35723384	unk
peak36847	214.497	1.23103	0.320217	3.84436	0.000120867	0.0188863	chr12	36569422	36569970	aatkb
peak36847	214.497	1.23103	0.320217	3.84436	0.000120867	0.0188863	chr12	36569422	36569970	cox10
peak36967	50.0962	2.83897	0.648179	4.37992	1.18721e-05	0.00311909	chr12	36990917	36991168	hs3st3b1b
peak36967	50.0962	2.83897	0.648179	4.37992	1.18721e-05	0.00311909	chr12	36990917	36991168	pmp22b
peak37260	81.3833	4.13783	0.578743	7.14969	8.6975e-13	2.07482e-09	chr12	38226030	38226426	rpl38
peak37284	74.8632	7.35471	1.17561	6.25607	3.94789e-10	5.3108e-07	chr12	38341257	38341520	rpl38
peak37285	58.9333	5.2931	1.34126	3.94636	7.93492e-05	0.0138505	chr12	38359007	38359339	rpl38
peak37287	49.9822	2.43285	0.631209	3.85426	0.000116079	0.0183303	chr12	38368978	38369240	rpl38
peak37308	70.1898	5.10652	0.756453	6.75061	1.47222e-11	2.66064e-08	chr12	38417237	38417558	kif19
peak37308	70.1898	5.10652	0.756453	6.75061	1.47222e-11	2.66064e-08	chr12	38417237	38417558	ttyh2
peak37309	349.856	1.00833	0.252922	3.98673	6.69901e-05	0.0121804	chr12	38422139	38422861	kif19
peak37309	349.856	1.00833	0.252922	3.98673	6.69901e-05	0.0121804	chr12	38422139	38422861	ttyh2
peak37323	124.072	1.52526	0.406841	3.74902	0.000177526	0.0256146	chr12	38464944	38465576	kif19
peak37323	124.072	1.52526	0.406841	3.74902	0.000177526	0.0256146	chr12	38464944	38465576	ttyh2
peak37326	97.1168	1.97574	0.460583	4.28965	1.78956e-05	0.00434671	chr12	38474052	38474480	kif19
peak37326	97.1168	1.97574	0.460583	4.28965	1.78956e-05	0.00434671	chr12	38474052	38474480	ttyh2
peak37573	170.773	1.25365	0.342293	3.66252	0.00024975	0.0335223	chr12	40192778	40193251	ppp2r2d
peak37855	158.37	1.48537	0.353704	4.19947	2.67543e-05	0.00603624	chr12	42259407	42259861	ebf3
peak37855	158.37	1.48537	0.353704	4.19947	2.67543e-05	0.00603624	chr12	42259407	42259861	glrx3
peak38019	437.858	0.899761	0.226637	3.97006	7.18552e-05	0.012856	chr12	42887062	42887573	NA
peak38078	140.44	1.98657	0.392085	5.06668	4.04806e-07	0.000197885	chr12	43202306	43203148	dock1
peak38078	140.44	1.98657	0.392085	5.06668	4.04806e-07	0.000197885	chr12	43202306	43203148	ptprea
peak38132	307.707	1.00022	0.2589	3.86333	0.000111851	0.0178518	chr12	43446060	43446625	bccip
peak38132	307.707	1.00022	0.2589	3.86333	0.000111851	0.0178518	chr12	43446060	43446625	ptprea
peak38163	359.053	0.950957	0.242648	3.91909	8.8885e-05	0.0150311	chr12	43606448	43606964	bccip
peak38163	359.053	0.950957	0.242648	3.91909	8.8885e-05	0.0150311	chr12	43606448	43606964	ptprea
peak38184	83.5086	2.06885	0.574591	3.60057	0.000317526	0.0396165	chr12	43674994	43675276	bccip
peak38184	83.5086	2.06885	0.574591	3.60057	0.000317526	0.0396165	chr12	43674994	43675276	ptprea
peak38410	87.0876	1.70136	0.469576	3.62318	0.000291008	0.0371102	chr12	45173188	45173590	fbxl15
peak38410	87.0876	1.70136	0.469576	3.62318	0.000291008	0.0371102	chr12	45173188	45173590	mrpl38
peak38498	1061.01	0.751434	0.16199	4.63878	3.50479e-06	0.0011944	chr12	45583900	45584619	fbxl15
peak38498	1061.01	0.751434	0.16199	4.63878	3.50479e-06	0.0011944	chr12	45583900	45584619	pax2b
peak38676	94.3114	2.96686	0.71334	4.15911	3.19496e-05	0.00689537	chr12	47051840	47052201	oat
peak38676	94.3114	2.96686	0.71334	4.15911	3.19496e-05	0.00689537	chr12	47051840	47052201	ryr2a
peak39228	56.9735	6.90833	1.19397	5.78604	7.20666e-09	6.69136e-06	chr13	207779	208168	ddx21
peak39228	56.9735	6.90833	1.19397	5.78604	7.20666e-09	6.69136e-06	chr13	207779	208168	zgc:171534
peak39537	49.2957	2.99806	0.660636	4.53814	5.67535e-06	0.00176245	chr13	1472719	1473009	hmgcll1
peak39537	49.2957	2.99806	0.660636	4.53814	5.67535e-06	0.00176245	chr13	1472719	1473009	si:ch211-165e15.1
peak39785	432.525	0.829917	0.224966	3.68908	0.000225066	0.0308329	chr13	2845839	2846388	si:ch211-233m11.2
peak39785	432.525	0.829917	0.224966	3.68908	0.000225066	0.0308329	chr13	2845839	2846388	si:ch211-71k24.5
peak39935	211.032	1.29866	0.307401	4.22463	2.39331e-05	0.00553228	chr13	3421034	3421623	park2
peak39935	211.032	1.29866	0.307401	4.22463	2.39331e-05	0.00553228	chr13	3421034	3421623	qkib
peak40618	20.8771	4.13698	1.13942	3.63077	0.000282574	0.0363195	chr13	6198460	6198768	mcph1
peak44330	255.789	1.13764	0.290806	3.91202	9.15282e-05	0.0153331	chr13	25326574	25327269	pkd2l1
peak44330	255.789	1.13764	0.290806	3.91202	9.15282e-05	0.0153331	chr13	25326574	25327269	tial1
peak44671	130.796	1.50495	0.395117	3.80887	0.000139602	0.0211824	chr13	26573273	26573736	fancl
peak44682	142.679	1.77287	0.372675	4.75714	1.96355e-06	0.000752266	chr13	26660739	26661299	fancl
peak44682	142.679	1.77287	0.372675	4.75714	1.96355e-06	0.000752266	chr13	26660739	26661299	vrk2
peak44853	50.5173	4.06373	0.722086	5.62777	1.82552e-08	1.38984e-05	chr13	27431026	27431413	ddx43
peak44853	50.5173	4.06373	0.722086	5.62777	1.82552e-08	1.38984e-05	chr13	27431026	27431413	kcnq5a
peak45160	31.2761	4.94873	1.03014	4.80392	1.55586e-06	0.000618595	chr13	28647873	28648164	nsmce4a
peak45160	31.2761	4.94873	1.03014	4.80392	1.55586e-06	0.000618595	chr13	28647873	28648164	prom2
peak4524	34.484	4.04402	0.865556	4.67217	2.98034e-06	0.00105328	chr1	23690554	23690925	qdprb2
peak46006	44.9605	3.82988	0.741602	5.16434	2.4129e-07	0.000125131	chr13	31810092	31810384	diexf
peak48605	391.583	0.862802	0.233507	3.69498	0.000219904	0.0303347	chr13	44361060	44361871	zfand3
peak48605	391.583	0.862802	0.233507	3.69498	0.000219904	0.0303347	chr13	44361060	44361871	zfyve21
peak48680	31.4354	3.38377	0.85004	3.98072	6.87077e-05	0.012392	chr13	44690668	44690940	glo1
peak48680	31.4354	3.38377	0.85004	3.98072	6.87077e-05	0.012392	chr13	44690668	44690940	si:dkeyp-2e4.6
peak48683	69.2398	2.58444	0.546998	4.72477	2.30379e-06	0.000851734	chr13	44701116	44701410	si:dkeyp-2e4.3
peak48683	69.2398	2.58444	0.546998	4.72477	2.30379e-06	0.000851734	chr13	44701116	44701410	si:dkeyp-2e4.3
peak48683	69.2398	2.58444	0.546998	4.72477	2.30379e-06	0.000851734	chr13	44701116	44701410	si:dkeyp-2e4.8
peak48956	446.201	0.84779	0.223931	3.78595	0.000153125	0.0227924	chr13	45975448	45975943	bsdc1
peak48956	446.201	0.84779	0.223931	3.78595	0.000153125	0.0227924	chr13	45975448	45975943	marcksl1a
peak49147	66.7415	2.47857	0.554685	4.46843	7.87952e-06	0.00231869	chr13	46687807	46688153	fbxo5
peak49147	66.7415	2.47857	0.554685	4.46843	7.87952e-06	0.00231869	chr13	46687807	46688153	vip
peak49193	100.392	1.92055	0.441649	4.34859	1.37017e-05	0.00352163	chr13	47025391	47025729	acoxl
peak49193	100.392	1.92055	0.441649	4.34859	1.37017e-05	0.00352163	chr13	47025391	47025729	anapc1
peak49279	535.747	1.18104	0.208015	5.67765	1.36561e-08	1.0859e-05	chr13	47529659	47530127	golga4
peak49279	535.747	1.18104	0.208015	5.67765	1.36561e-08	1.0859e-05	chr13	47529659	47530127	si:ch211-127b6.2
peak49301	70.5701	2.66618	0.550529	4.84294	1.27931e-06	0.000528608	chr13	47608604	47609331	golga4
peak49301	70.5701	2.66618	0.550529	4.84294	1.27931e-06	0.000528608	chr13	47608604	47609331	si:ch211-127b6.2
peak49307	127.892	1.69991	0.454647	3.73897	0.000184773	0.0264469	chr13	47625655	47626383	golga4
peak49307	127.892	1.69991	0.454647	3.73897	0.000184773	0.0264469	chr13	47625655	47626383	si:ch211-127b6.2
peak49338	127.501	1.44928	0.393177	3.68608	0.000227734	0.0311745	chr13	47715977	47716427	NA
peak50258	363.626	1.1258	0.243931	4.61526	3.92602e-06	0.00130562	chr14	321577	322431	hs3st1
peak50258	363.626	1.1258	0.243931	4.61526	3.92602e-06	0.00130562	chr14	321577	322431	zgc:172215
peak50641	260.585	1.00113	0.278347	3.5967	0.000322277	0.040045	chr14	1861832	1862472	kcnip1a
peak50641	260.585	1.00113	0.278347	3.5967	0.000322277	0.040045	chr14	1861832	1862472	zgc:171591
peak51182	233.312	1.26423	0.293779	4.30333	1.68252e-05	0.00414068	chr14	4966205	4966642	lbx2
peak51182	233.312	1.26423	0.293779	4.30333	1.68252e-05	0.00414068	chr14	4966205	4966642	zgc:110204
peak52220	157.571	1.38579	0.353488	3.92034	8.84231e-05	0.0149955	chr14	10776836	10777226	abcb7
peak52220	157.571	1.38579	0.353488	3.92034	8.84231e-05	0.0149955	chr14	10776836	10777226	zgc:112315
peak52241	239.564	1.18942	0.302332	3.93416	8.34897e-05	0.0143907	chr14	10883537	10884103	abcb7
peak52241	239.564	1.18942	0.302332	3.93416	8.34897e-05	0.0143907	chr14	10883537	10884103	zgc:112315
peak52321	73.7529	2.74523	0.531641	5.16369	2.42131e-07	0.000125205	chr14	11407278	11407731	zgc:174917
peak52321	73.7529	2.74523	0.531641	5.16369	2.42131e-07	0.000125205	chr14	11407278	11407731	znf6
peak52491	55.5429	4.19578	0.762217	5.50471	3.69786e-08	2.56435e-05	chr14	12902853	12903328	gria2a
peak52491	55.5429	4.19578	0.762217	5.50471	3.69786e-08	2.56435e-05	chr14	12902853	12903328	pls3
peak52500	52.1649	2.59075	0.665852	3.89089	9.98786e-05	0.0164129	chr14	13008062	13008820	gria2a
peak52500	52.1649	2.59075	0.665852	3.89089	9.98786e-05	0.0164129	chr14	13008062	13008820	pls3
peak52831	19.7168	4.19381	1.17416	3.57175	0.0003546	0.043077	chr14	15294276	15294539	neurl1b
peak52831	19.7168	4.19381	1.17416	3.57175	0.0003546	0.043077	chr14	15294276	15294539	si:dkey-203a12.2
peak53289	101.353	1.77745	0.437798	4.05997	4.9079e-05	0.00970158	chr14	17754024	17754575	zgc:153710
peak53411	230.513	1.08825	0.29787	3.65345	0.000258738	0.0342861	chr14	19024465	19025184	fmr1
peak53411	230.513	1.08825	0.29787	3.65345	0.000258738	0.0342861	chr14	19024465	19025184	polr1a
peak53434	31.1763	3.09363	0.852639	3.6283	0.000285294	0.0365387	chr14	19339853	19340156	fmr1
peak53434	31.1763	3.09363	0.852639	3.6283	0.000285294	0.0365387	chr14	19339853	19340156	polr1a
peak53590	14.0597	7.28465	1.83923	3.96071	7.47281e-05	0.0132114	chr14	20294680	20295023	fmr1
peak53590	14.0597	7.28465	1.83923	3.96071	7.47281e-05	0.0132114	chr14	20294680	20295023	ids
peak53747	654.771	1.05853	0.228628	4.62992	3.65806e-06	0.00123721	chr14	20997994	20998698	egr1
peak53747	654.771	1.05853	0.228628	4.62992	3.65806e-06	0.00123721	chr14	20997994	20998698	zgc:114040
peak53762	98.4966	2.62873	0.465106	5.6519	1.58685e-08	1.2344e-05	chr14	21069547	21069930	egr1
peak53762	98.4966	2.62873	0.465106	5.6519	1.58685e-08	1.2344e-05	chr14	21069547	21069930	reep2
peak54559	237.585	1.68289	0.294034	5.72345	1.04381e-08	8.76777e-06	chr14	24707332	24708124	pde6a
peak54559	237.585	1.68289	0.294034	5.72345	1.04381e-08	8.76777e-06	chr14	24707332	24708124	ppargc1b
peak54944	771.572	0.678779	0.179336	3.78496	0.000153732	0.022855	chr14	26379715	26380641	arap3
peak54944	771.572	0.678779	0.179336	3.78496	0.000153732	0.022855	chr14	26379715	26380641	neurog1
peak55025	59.2719	2.25789	0.583762	3.86783	0.000109809	0.0176044	chr14	26759992	26760327	tsc22d3
peak55025	59.2719	2.25789	0.583762	3.86783	0.000109809	0.0176044	chr14	26759992	26760327	zgc:162298
peak5579	532.613	0.779784	0.206943	3.76812	0.000164484	0.0241218	chr1	29770353	29770984	dachc
peak5579	532.613	0.779784	0.206943	3.76812	0.000164484	0.0241218	chr1	29770353	29770984	zgc:158645
peak5598	348.204	1.00954	0.249301	4.04948	5.13308e-05	0.00996079	chr1	29840831	29841534	dachc
peak5598	348.204	1.00954	0.249301	4.04948	5.13308e-05	0.00996079	chr1	29840831	29841534	zgc:158645
peak5634	120.636	2.47722	0.428157	5.78577	7.21814e-09	6.69136e-06	chr1	30183385	30184134	dlx2b
peak5634	120.636	2.47722	0.428157	5.78577	7.21814e-09	6.69136e-06	chr1	30183385	30184134	itga6b
peak56636	133.896	1.53869	0.383716	4.00996	6.0729e-05	0.0112828	chr14	33423777	33424433	apln
peak56636	133.896	1.53869	0.383716	4.00996	6.0729e-05	0.0112828	chr14	33423777	33424433	zdhhc24
peak56886	41.7371	3.37721	0.764882	4.41533	1.00854e-05	0.0028019	chr14	34458553	34458788	ablim3
peak56886	41.7371	3.37721	0.764882	4.41533	1.00854e-05	0.0028019	chr14	34458553	34458788	adrb2a
peak56976	53.3014	3.55521	0.902044	3.94128	8.1048e-05	0.0140647	chr14	34793508	34793741	clint1a
peak56976	53.3014	3.55521	0.902044	3.94128	8.1048e-05	0.0140647	chr14	34793508	34793741	ebf1a
peak57016	92.6766	1.80374	0.456905	3.94773	7.88943e-05	0.013798	chr14	34918663	34919085	clint1a
peak57016	92.6766	1.80374	0.456905	3.94773	7.88943e-05	0.013798	chr14	34918663	34919085	ebf1a
peak57172	474.74	0.794461	0.216514	3.66933	0.000243184	0.0327877	chr14	35644083	35644811	pitx2
peak57172	474.74	0.794461	0.216514	3.66933	0.000243184	0.0327877	chr14	35644083	35644811	zgc:77938
peak57418	122.046	1.52059	0.403622	3.76736	0.000164982	0.0241675	chr14	36603361	36604330	lect2l
peak57418	122.046	1.52059	0.403622	3.76736	0.000164982	0.0241675	chr14	36603361	36604330	pcdh1b
peak57482	94.6921	1.74392	0.454769	3.83473	0.0001257	0.0195097	chr14	37005533	37006014	lect2l
peak57482	94.6921	1.74392	0.454769	3.83473	0.0001257	0.0195097	chr14	37005533	37006014	pcdh1b
peak58500	421.675	1.1651	0.27261	4.27387	1.92113e-05	0.00460133	chr14	41247056	41247612	fgfrl1b
peak58500	421.675	1.1651	0.27261	4.27387	1.92113e-05	0.00460133	chr14	41247056	41247612	itga6l
peak58671	160.88	1.71762	0.360907	4.75919	1.94371e-06	0.000747867	chr14	41986120	41986614	pcdh10b
peak58671	160.88	1.71762	0.360907	4.75919	1.94371e-06	0.000747867	chr14	41986120	41986614	pcdh18b
peak58694	22.8523	3.89625	1.04289	3.73601	0.000186961	0.0266748	chr14	42087977	42088214	NA
peak5876	259.86	1.02554	0.29033	3.53232	0.000411933	0.0474878	chr1	31798064	31798923	nlgn4a
peak5876	259.86	1.02554	0.29033	3.53232	0.000411933	0.0474878	chr1	31798064	31798923	zgc:174320
peak58945	56.9625	9.30346	1.55182	5.99521	2.03219e-09	2.17718e-06	chr14	43163401	43163752	adra1bb
peak58945	56.9625	9.30346	1.55182	5.99521	2.03219e-09	2.17718e-06	chr14	43163401	43163752	eif4ea
peak58977	45.7599	3.87447	0.782985	4.94833	7.48548e-07	0.00033315	chr14	43309042	43309359	gar1
peak59033	111.268	2.27399	0.427209	5.3229	1.02128e-07	6.23626e-05	chr14	43609048	43609602	gar1
peak59033	111.268	2.27399	0.427209	5.3229	1.02128e-07	6.23626e-05	chr14	43609048	43609602	grhpra
peak59267	174.797	1.57752	0.33835	4.66239	3.12564e-06	0.00109437	chr14	45532713	45533186	slc30a10
peak59267	174.797	1.57752	0.33835	4.66239	3.12564e-06	0.00109437	chr14	45532713	45533186	sncb
peak59741	392.612	0.853321	0.23328	3.65793	0.000254261	0.0338727	chr14	47777078	47777607	ldb2a
peak59741	392.612	0.853321	0.23328	3.65793	0.000254261	0.0338727	chr14	47777078	47777607	prom1a
peak59950	556.313	0.88257	0.213977	4.1246	3.71373e-05	0.00780777	chr14	49020014	49021008	fstl5
peak59950	556.313	0.88257	0.213977	4.1246	3.71373e-05	0.00780777	chr14	49020014	49021008	rapgef2
peak60026	113.135	1.72922	0.482076	3.58704	0.000334453	0.0412681	chr14	49513391	49513828	ube2d2l
peak60026	113.135	1.72922	0.482076	3.58704	0.000334453	0.0412681	chr14	49513391	49513828	zgc:171797
peak60306	112.808	1.52272	0.416401	3.65686	0.000255325	0.0339639	chr14	50917797	50918198	atpv0e1
peak60306	112.808	1.52272	0.416401	3.65686	0.000255325	0.0339639	chr14	50917797	50918198	nfkb1
peak60345	528.636	0.73581	0.207047	3.55383	0.000379664	0.0450448	chr14	51067641	51068208	NA
peak60490	202.866	1.15411	0.325616	3.5444	0.000393505	0.0460502	chr14	51825220	51825835	exosc3
peak60490	202.866	1.15411	0.325616	3.5444	0.000393505	0.0460502	chr14	51825220	51825835	ppp2r2ba
peak60503	48.0102	3.6735	0.70834	5.18608	2.14771e-07	0.000112686	chr14	51860332	51860566	atpv0e1
peak60503	48.0102	3.6735	0.70834	5.18608	2.14771e-07	0.000112686	chr14	51860332	51860566	nfkb1
peak62339	306.903	0.942648	0.259319	3.6351	0.000277876	0.0358472	chr15	10300261	10301024	odz4
peak62604	471.599	0.872601	0.216272	4.03474	5.46622e-05	0.0104374	chr15	12235734	12236467	fxyd6
peak62604	471.599	0.872601	0.216272	4.03474	5.46622e-05	0.0104374	chr15	12235734	12236467	p4ha3
peak68610	400.883	1.06484	0.26058	4.08641	4.38099e-05	0.00890711	chr15	40124447	40124907	rps5
peak68624	33.8414	3.3044	0.833557	3.96421	7.36387e-05	0.0130718	chr15	40198205	40198500	lpar5b
peak68746	1180.39	0.628721	0.154673	4.06483	4.8067e-05	0.00954485	chr15	40711395	40712162	kcnj13
peak68746	1180.39	0.628721	0.154673	4.06483	4.8067e-05	0.00954485	chr15	40711395	40712162	mtnr1ba
peak68771	145.946	1.78713	0.370235	4.82703	1.38585e-06	0.000563523	chr15	40804691	40805203	kcnj13
peak68771	145.946	1.78713	0.370235	4.82703	1.38585e-06	0.000563523	chr15	40804691	40805203	mtnr1ba
peak68860	38.5141	6.38303	1.27008	5.02568	5.01659e-07	0.000236819	chr15	41389779	41390000	si:dkey-121n8.4
peak68860	38.5141	6.38303	1.27008	5.02568	5.01659e-07	0.000236819	chr15	41389779	41390000	si:dkey-121n8.8
peak68861	87.6881	4.8138	0.62166	7.74345	9.67511e-15	3.03688e-11	chr15	41391603	41392336	si:dkey-121n8.4
peak68861	87.6881	4.8138	0.62166	7.74345	9.67511e-15	3.03688e-11	chr15	41391603	41392336	si:dkey-121n8.8
peak68865	29.1568	4.23959	0.96931	4.37382	1.2209e-05	0.00318454	chr15	41414093	41414397	si:dkey-121n8.4
peak68865	29.1568	4.23959	0.96931	4.37382	1.2209e-05	0.00318454	chr15	41414093	41414397	si:dkey-121n8.8
peak68881	48.8676	4.24765	0.804187	5.28191	1.27841e-07	7.47473e-05	chr15	41566764	41567087	si:ch211-187g4.1
peak68881	48.8676	4.24765	0.804187	5.28191	1.27841e-07	7.47473e-05	chr15	41566764	41567087	si:ch211-276c2.2
peak68883	69.5863	3.01621	0.639787	4.7144	2.4243e-06	0.000879804	chr15	41596365	41596723	si:ch211-187g4.1
peak68883	69.5863	3.01621	0.639787	4.7144	2.4243e-06	0.000879804	chr15	41596365	41596723	si:ch211-276c2.2
peak68980	41.4277	3.43687	0.767132	4.48016	7.4588e-06	0.00221309	chr15	42083074	42083382	epha4l
peak68992	82.8827	1.88317	0.528765	3.56144	0.00036882	0.0443094	chr15	42128081	42128456	epha4l
peak68992	82.8827	1.88317	0.528765	3.56144	0.00036882	0.0443094	chr15	42128081	42128456	pax3b
peak69016	179.649	1.44591	0.360875	4.00667	6.15815e-05	0.0114056	chr15	42229373	42229918	epha4l
peak69016	179.649	1.44591	0.360875	4.00667	6.15815e-05	0.0114056	chr15	42229373	42229918	pax3b
peak69102	52.7234	2.48673	0.664236	3.74374	0.0001813	0.0260947	chr15	42631729	42632028	cldn17
peak69102	52.7234	2.48673	0.664236	3.74374	0.0001813	0.0260947	chr15	42631729	42632028	si:ch211-181d7.1
peak69555	362.438	1.0139	0.253461	4.00021	6.32854e-05	0.011625	chr15	45275971	45276559	csf1ra
peak69555	362.438	1.0139	0.253461	4.00021	6.32854e-05	0.011625	chr15	45275971	45276559	psmd2
peak70059	158.174	1.91432	0.359991	5.31769	1.05094e-07	6.35235e-05	chr15	47518736	47519540	zgc:153039
peak70059	158.174	1.91432	0.359991	5.31769	1.05094e-07	6.35235e-05	chr15	47518736	47519540	zgc:165502
peak70214	342.76	1.02735	0.256118	4.01124	6.04013e-05	0.0112336	chr16	341150	341805	irx2a
peak70214	342.76	1.02735	0.256118	4.01124	6.04013e-05	0.0112336	chr16	341150	341805	nrsn1
peak70438	106.929	1.53886	0.433686	3.54832	0.000387696	0.0456094	chr16	1066438	1066814	celf3b
peak70438	106.929	1.53886	0.433686	3.54832	0.000387696	0.0456094	chr16	1066438	1066814	irx1a
peak70805	221.475	1.51535	0.323982	4.67725	2.90741e-06	0.0010321	chr16	3041296	3041991	hace1
peak70805	221.475	1.51535	0.323982	4.67725	2.90741e-06	0.0010321	chr16	3041296	3041991	naa40
peak70910	253.437	1.09232	0.292396	3.73576	0.000187151	0.0266805	chr16	3692199	3692731	csf3r
peak70910	253.437	1.09232	0.292396	3.73576	0.000187151	0.0266805	chr16	3692199	3692731	vegfaa
peak70923	212.636	1.16982	0.32324	3.61904	0.000295694	0.0375206	chr16	3767348	3767935	csf3r
peak70923	212.636	1.16982	0.32324	3.61904	0.000295694	0.0375206	chr16	3767348	3767935	vegfaa
peak72110	36.6548	2.78766	0.782304	3.5634	0.000366086	0.0440472	chr16	9140228	9140506	dnah5
peak72110	36.6548	2.78766	0.782304	3.5634	0.000366086	0.0440472	chr16	9140228	9140506	trio
peak73029	35.607	4.17117	0.884221	4.71734	2.3895e-06	0.000870708	chr16	14105376	14105695	fdps
peak73029	35.607	4.17117	0.884221	4.71734	2.3895e-06	0.000870708	chr16	14105376	14105695	zgc:162509
peak73520	32.3571	4.00914	0.917271	4.37073	1.23831e-05	0.00320163	chr16	17146019	17146305	plekhg6
peak73520	32.3571	4.00914	0.917271	4.37073	1.23831e-05	0.00320163	chr16	17146019	17146305	rpl18
peak73563	42.9783	2.65569	0.746548	3.55729	0.000374698	0.0447524	chr16	17360964	17361308	si:dkey-91i17.5
peak73563	42.9783	2.65569	0.746548	3.55729	0.000374698	0.0447524	chr16	17360964	17361308	zgc:136360
peak73666	42.2537	4.03014	0.78356	5.14337	2.69848e-07	0.000136384	chr16	17944421	17944689	si:dkey-80m2.2
peak73666	42.2537	4.03014	0.78356	5.14337	2.69848e-07	0.000136384	chr16	17944421	17944689	zgc:158847
peak74582	201.254	1.49743	0.329591	4.54329	5.5384e-06	0.00172932	chr16	23139764	23140460	NA
peak74583	35.3813	3.99591	0.884146	4.51952	6.19805e-06	0.00188272	chr16	23166069	23166353	NA
peak75134	51.5058	2.47071	0.690051	3.58047	0.000342983	0.0420019	chr16	25501071	25501433	dtnbp1a
peak75134	51.5058	2.47071	0.690051	3.58047	0.000342983	0.0420019	chr16	25501071	25501433	jarid2a
peak75236	61.0097	2.43703	0.671101	3.6314	0.000281893	0.036258	chr16	25931524	25931862	irge4
peak75236	61.0097	2.43703	0.671101	3.6314	0.000281893	0.036258	chr16	25931524	25931862	zgc:66382
peak75646	18.8778	5.39652	1.4417	3.74316	0.000181724	0.0261149	chr16	27833792	27834112	tbrg4
peak75646	18.8778	5.39652	1.4417	3.74316	0.000181724	0.0261149	chr16	27833792	27834112	znf804b
peak75673	81.789	7.13077	1.92686	3.70072	0.000214986	0.0298173	chr16	28052865	28053404	fam188a
peak75673	81.789	7.13077	1.92686	3.70072	0.000214986	0.0298173	chr16	28052865	28053404	znf804b
peak75800	308.069	0.942397	0.262806	3.5859	0.000335921	0.0413636	chr16	28694509	28694980	abcb4
peak75800	308.069	0.942397	0.262806	3.5859	0.000335921	0.0413636	chr16	28694509	28694980	crot
peak75979	53.9852	2.21122	0.60545	3.65219	0.000260016	0.0343581	chr16	29371171	29371613	bcan
peak75979	53.9852	2.21122	0.60545	3.65219	0.000260016	0.0343581	chr16	29371171	29371613	hapln2
peak76346	46.0401	5.25018	0.920586	5.70309	1.17655e-08	9.52496e-06	chr16	30998501	30998849	si:ch211-198d13.2
peak76394	65.6007	3.50835	0.628505	5.58206	2.37684e-08	1.74284e-05	chr16	31237451	31238030	scrt1b
peak76394	65.6007	3.50835	0.628505	5.58206	2.37684e-08	1.74284e-05	chr16	31237451	31238030	si:ch211-251p5.3
peak76395	171.836	1.51444	0.354402	4.27323	1.92663e-05	0.00460833	chr16	31242498	31243288	scrt1b
peak76395	171.836	1.51444	0.354402	4.27323	1.92663e-05	0.00460833	chr16	31242498	31243288	si:ch211-251p5.3
peak76563	55.4967	2.70681	0.610072	4.43687	9.12768e-06	0.00257178	chr16	32010457	32010943	phc1
peak76563	55.4967	2.70681	0.610072	4.43687	9.12768e-06	0.00257178	chr16	32010457	32010943	styk1
peak77127	30.6716	3.23625	0.880851	3.67401	0.000238776	0.0323886	chr16	34114653	34114970	fam46ba
peak77127	30.6716	3.23625	0.880851	3.67401	0.000238776	0.0323886	chr16	34114653	34114970	tcea3
peak77184	28.1963	4.00111	0.960321	4.16643	3.09404e-05	0.00673933	chr16	34354567	34354805	hivep3b
peak77184	28.1963	4.00111	0.960321	4.16643	3.09404e-05	0.00673933	chr16	34354567	34354805	phactr4b
peak77185	23.4928	8.02583	1.69129	4.7454	2.08094e-06	0.000787493	chr16	34354842	34355137	hivep3b
peak77185	23.4928	8.02583	1.69129	4.7454	2.08094e-06	0.000787493	chr16	34354842	34355137	phactr4b
peak77926	468.754	0.912542	0.216988	4.20549	2.60522e-05	0.00590764	chr16	38150942	38151560	plekho1b
peak77926	468.754	0.912542	0.216988	4.20549	2.60522e-05	0.00590764	chr16	38150942	38151560	si:dkey-23o4.6
peak784	341.792	0.879115	0.247488	3.55216	0.000382083	0.0451522	chr1	3865377	3865914	rcan1b
peak784	341.792	0.879115	0.247488	3.55216	0.000382083	0.0451522	chr1	3865377	3865914	spry2
peak78490	113.58	4.71228	0.531788	8.86121	7.91495e-19	4.88311e-15	chr16	40523566	40524259	ndufaf6
peak78490	113.58	4.71228	0.531788	8.86121	7.91495e-19	4.88311e-15	chr16	40523566	40524259	plekhf2
peak78541	54.7628	5.76042	0.917516	6.27828	3.42338e-10	4.74801e-07	chr16	40719777	40720182	ccne2
peak78541	54.7628	5.76042	0.917516	6.27828	3.42338e-10	4.74801e-07	chr16	40719777	40720182	si:dkey-22o22.2
peak78565	656.991	0.889269	0.190699	4.66322	3.11305e-06	0.0010921	chr16	40805535	40806788	ccne2
peak78565	656.991	0.889269	0.190699	4.66322	3.11305e-06	0.0010921	chr16	40805535	40806788	si:dkey-22o22.2
peak78606	137.222	2.22344	0.392438	5.6657	1.46422e-08	1.14899e-05	chr16	40923664	40924186	gbp
peak78606	137.222	2.22344	0.392438	5.6657	1.46422e-08	1.14899e-05	chr16	40923664	40924186	si:dkey-22o22.2
peak78637	22.4921	5.1546	1.29401	3.98343	6.79285e-05	0.0122762	chr16	41035468	41035794	gbp
peak78637	22.4921	5.1546	1.29401	3.98343	6.79285e-05	0.0122762	chr16	41035468	41035794	si:dkey-201i6.2
peak78703	37.8427	2.58563	0.729921	3.54235	0.000396584	0.0462849	chr16	41459059	41459637	cmtm6
peak78703	37.8427	2.58563	0.729921	3.54235	0.000396584	0.0462849	chr16	41459059	41459637	si:dkey-283f16.1
peak78761	262.145	3.55741	0.311876	11.4065	3.88118e-30	2.31467e-25	chr16	41767080	41767928	atp2c1
peak78761	262.145	3.55741	0.311876	11.4065	3.88118e-30	2.31467e-25	chr16	41767080	41767928	si:dkey-199f5.8
peak78883	254.675	3.48799	0.313128	11.1392	8.08763e-29	3.6175e-24	chr16	42257381	42258363	fbl
peak78883	254.675	3.48799	0.313128	11.1392	8.08763e-29	3.6175e-24	chr16	42257381	42258363	zgc:162160
peak78906	20.83	4.14834	1.13539	3.65366	0.000258529	0.0342861	chr16	42369904	42370154	oxr1a
peak78906	20.83	4.14834	1.13539	3.65366	0.000258529	0.0342861	chr16	42369904	42370154	wu:fi16e04
peak78907	31.1522	3.56893	0.887472	4.02146	5.78384e-05	0.0108699	chr16	42370259	42370590	oxr1a
peak78907	31.1522	3.56893	0.887472	4.02146	5.78384e-05	0.0108699	chr16	42370259	42370590	wu:fi16e04
peak79053	146.13	1.42317	0.365161	3.89738	9.72409e-05	0.0161241	chr16	42968753	42969222	hfe2
peak79053	146.13	1.42317	0.365161	3.89738	9.72409e-05	0.0161241	chr16	42968753	42969222	polr3glb
peak79081	43.4467	3.42795	0.725746	4.72335	2.31988e-06	0.000855798	chr16	43112318	43112675	nudt17
peak79378	129.737	3.33108	0.422935	7.87611	3.37741e-15	1.14013e-11	chr16	44724107	44724487	upk1a
peak79378	129.737	3.33108	0.422935	7.87611	3.37741e-15	1.14013e-11	chr16	44724107	44724487	zgc:101716
peak79770	118.098	2.4184	0.417422	5.79364	6.88763e-09	6.45184e-06	chr16	46662686	46663043	tmem176l.2
peak79770	118.098	2.4184	0.417422	5.79364	6.88763e-09	6.45184e-06	chr16	46662686	46663043	zgc:174938
peak79879	57.6294	2.20328	0.582584	3.78191	0.000155631	0.0230885	chr16	47341059	47341503	mios
peak79879	57.6294	2.20328	0.582584	3.78191	0.000155631	0.0230885	chr16	47341059	47341503	rab11al
peak79969	76.6819	2.32855	0.510543	4.56092	5.0931e-06	0.0016128	chr16	48055831	48056304	rad21a
peak79969	76.6819	2.32855	0.510543	4.56092	5.0931e-06	0.0016128	chr16	48055831	48056304	slc25a32b
peak80002	347.002	1.32886	0.253729	5.23733	1.62913e-07	8.85946e-05	chr16	48405215	48405813	rad21a
peak80002	347.002	1.32886	0.253729	5.23733	1.62913e-07	8.85946e-05	chr16	48405215	48405813	slc25a32b
peak80055	36.3929	3.23069	0.860958	3.75244	0.000175119	0.025349	chr16	48646419	48646662	ext1a
peak80055	36.3929	3.23069	0.860958	3.75244	0.000175119	0.025349	chr16	48646419	48646662	pbx2
peak80081	331.276	1.03064	0.287504	3.58478	0.000337364	0.0415127	chr16	48736349	48736838	notchl
peak80081	331.276	1.03064	0.287504	3.58478	0.000337364	0.0415127	chr16	48736349	48736838	tap1
peak80200	719.778	0.727255	0.183941	3.95374	7.69399e-05	0.0134958	chr16	49372295	49372994	efhb
peak80200	719.778	0.727255	0.183941	3.95374	7.69399e-05	0.0134958	chr16	49372295	49372994	tap1
peak80263	41.967	2.80281	0.708477	3.95611	7.61809e-05	0.0133889	chr16	49753399	49753997	rab5ab
peak80263	41.967	2.80281	0.708477	3.95611	7.61809e-05	0.0133889	chr16	49753399	49753997	ube2e2
peak80342	93.3942	1.92954	0.474072	4.07013	4.69866e-05	0.00939776	chr16	50146211	50146636	efhb
peak80342	93.3942	1.92954	0.474072	4.07013	4.69866e-05	0.00939776	chr16	50146211	50146636	tap1
peak80954	98.8076	3.98953	0.516901	7.71819	1.17996e-14	3.63987e-11	chr16	53294745	53295091	nkd2a
peak80954	98.8076	3.98953	0.516901	7.71819	1.17996e-14	3.63987e-11	chr16	53294745	53295091	ptdss1
peak81017	35.1427	3.37525	0.817023	4.13116	3.60945e-05	0.00763339	chr16	53606892	53607157	grina
peak81017	35.1427	3.37525	0.817023	4.13116	3.60945e-05	0.00763339	chr16	53606892	53607157	smpd5
peak81090	49.3533	4.58977	0.778446	5.89607	3.72268e-09	3.65958e-06	chr16	54001460	54001989	ggctb
peak81114	225.21	1.12631	0.313125	3.59699	0.000321915	0.040045	chr16	54090162	54090563	fzd1
peak81114	225.21	1.12631	0.313125	3.59699	0.000321915	0.040045	chr16	54090162	54090563	zgc:172096
peak81402	23.2357	4.17467	1.06533	3.91866	8.90421e-05	0.0150386	chr16	55277207	55277429	tmem222a
peak81402	23.2357	4.17467	1.06533	3.91866	8.90421e-05	0.0150386	chr16	55277207	55277429	zgc:114181
peak81403	112.754	1.5349	0.427545	3.59004	0.000330633	0.0409095	chr16	55277679	55278495	tmem222a
peak81403	112.754	1.5349	0.427545	3.59004	0.000330633	0.0409095	chr16	55277679	55278495	zgc:114181
peak81494	406.576	1.2351	0.254454	4.85394	1.21032e-06	0.000504767	chr17	381200	382232	actc1b
peak81494	406.576	1.2351	0.254454	4.85394	1.21032e-06	0.000504767	chr17	381200	382232	adssl1
peak81519	76.6232	1.80141	0.508769	3.54071	0.000399049	0.0464601	chr17	508174	508737	chrm5a
peak81519	76.6232	1.80141	0.508769	3.54071	0.000399049	0.0464601	chr17	508174	508737	fsip1
peak81574	32.792	3.54589	0.874636	4.05413	5.03202e-05	0.00982865	chr17	803367	803619	cyp1c2
peak81574	32.792	3.54589	0.874636	4.05413	5.03202e-05	0.00982865	chr17	803367	803619	gchfr
peak81611	139.267	2.87766	0.422498	6.81107	9.68773e-12	1.8245e-08	chr17	1019232	1019889	dnajc17
peak81821	108.901	1.86081	0.424677	4.3817	1.17755e-05	0.00310161	chr17	1910811	1911297	spint1a
peak81821	108.901	1.86081	0.424677	4.3817	1.17755e-05	0.00310161	chr17	1910811	1911297	srp14
peak81873	238.155	1.29352	0.30403	4.25457	2.09451e-05	0.00493727	chr17	2312237	2312674	ccbe1
peak81873	238.155	1.29352	0.30403	4.25457	2.09451e-05	0.00493727	chr17	2312237	2312674	zp3.2
peak81917	116.571	1.98725	0.4178	4.75647	1.97009e-06	0.00075316	chr17	2936540	2937055	bdkrb1
peak81917	116.571	1.98725	0.4178	4.75647	1.97009e-06	0.00075316	chr17	2936540	2937055	zgc:136872
peak81925	26.2308	3.95824	1.038	3.81335	0.000137096	0.0209082	chr17	2995941	2996414	bdkrb1
peak81925	26.2308	3.95824	1.038	3.81335	0.000137096	0.0209082	chr17	2995941	2996414	zgc:136872
peak82226	115.153	1.59569	0.410519	3.88701	0.000101486	0.0165109	chr17	5283354	5283851	clic5a
peak82226	115.153	1.59569	0.410519	3.88701	0.000101486	0.0165109	chr17	5283354	5283851	runx2a
peak82265	86.0349	1.70346	0.475729	3.58074	0.000342619	0.0419976	chr17	5480848	5481330	fam167aa
peak82265	86.0349	1.70346	0.475729	3.58074	0.000342619	0.0419976	chr17	5480848	5481330	si:ch73-340m8.2
peak82321	62.4482	2.86495	0.582903	4.91498	8.87929e-07	0.00038653	chr17	5932751	5933125	chrna2a
peak82321	62.4482	2.86495	0.582903	4.91498	8.87929e-07	0.00038653	chr17	5932751	5933125	ptk2ba
peak82727	146.308	1.34059	0.365459	3.66824	0.000244225	0.0329033	chr17	8200362	8200861	fzd3b
peak82727	146.308	1.34059	0.365459	3.66824	0.000244225	0.0329033	chr17	8200362	8200861	lft2
peak82821	452.178	0.961887	0.226998	4.23742	2.26099e-05	0.00526271	chr17	8541002	8541940	ctbp2
peak82821	452.178	0.961887	0.226998	4.23742	2.26099e-05	0.00526271	chr17	8541002	8541940	zgc:171416
peak82864	89.3371	2.3079	0.517809	4.45704	8.30974e-06	0.00241186	chr17	8767804	8768245	psmc1a
peak83284	246.412	1.06357	0.292585	3.63508	0.000277898	0.0358472	chr17	10722445	10723008	kiaa0586
peak83284	246.412	1.06357	0.292585	3.63508	0.000277898	0.0358472	chr17	10722445	10723008	lgals3l
peak83296	443.324	0.879223	0.226065	3.88924	0.000100557	0.0164754	chr17	10764568	10765141	kiaa0586
peak83296	443.324	0.879223	0.226065	3.88924	0.000100557	0.0164754	chr17	10764568	10765141	lgals3l
peak83556	59.1442	2.04843	0.573089	3.57437	0.000351078	0.0427591	chr17	11774851	11775210	efcab2
peak83556	59.1442	2.04843	0.573089	3.57437	0.000351078	0.0427591	chr17	11774851	11775210	smyd3
peak83567	37.4803	3.69551	0.813029	4.54535	5.48428e-06	0.00171842	chr17	11854536	11854781	efcab2
peak83567	37.4803	3.69551	0.813029	4.54535	5.48428e-06	0.00171842	chr17	11854536	11854781	smyd3
peak83613	23.895	3.95916	1.02973	3.84486	0.000120619	0.0188669	chr17	12066468	12066688	ahctf1
peak83613	23.895	3.95916	1.02973	3.84486	0.000120619	0.0188669	chr17	12066468	12066688	sccpdha
peak84696	411.855	1.20839	0.230654	5.239	1.61453e-07	8.80683e-05	chr17	17630277	17630799	adck1
peak84696	411.855	1.20839	0.230654	5.239	1.61453e-07	8.80683e-05	chr17	17630277	17630799	nrxn3a
peak84752	42.4403	3.52805	0.948863	3.71819	0.000200658	0.0282962	chr17	17852616	17852872	hhipl1
peak84752	42.4403	3.52805	0.948863	3.71819	0.000200658	0.0282962	chr17	17852616	17852872	sptlc2a
peak84797	373.22	1.19839	0.257819	4.6482	3.34848e-06	0.00115432	chr17	17953520	17953944	ccdc85ca
peak84797	373.22	1.19839	0.257819	4.6482	3.34848e-06	0.00115432	chr17	17953520	17953944	setd3
peak84864	187.136	1.21084	0.325289	3.72235	0.00019738	0.0279035	chr17	18170979	18171519	setd3
peak84864	187.136	1.21084	0.325289	3.72235	0.00019738	0.0279035	chr17	18170979	18171519	vrk1
peak84876	112.755	1.71243	0.415325	4.12311	3.73799e-05	0.00784444	chr17	18213572	18213998	setd3
peak84876	112.755	1.71243	0.415325	4.12311	3.73799e-05	0.00784444	chr17	18213572	18213998	vrk1
peak84977	85.7663	2.24006	0.48593	4.60983	4.02993e-06	0.00131813	chr17	18652116	18652670	setd3
peak84977	85.7663	2.24006	0.48593	4.60983	4.02993e-06	0.00131813	chr17	18652116	18652670	vrk1
peak85098	97.325	2.04357	0.466117	4.38425	1.16389e-05	0.00308042	chr17	19393170	19394005	dicer1
peak85098	97.325	2.04357	0.466117	4.38425	1.16389e-05	0.00308042	chr17	19393170	19394005	gsc
peak86227	466.111	0.800819	0.224543	3.56644	0.000361859	0.0436968	chr17	24474265	24475001	peli1b
peak86227	466.111	0.800819	0.224543	3.56644	0.000361859	0.0436968	chr17	24474265	24475001	ugp2b
peak86231	681.473	0.70603	0.195968	3.60279	0.000314822	0.0393915	chr17	24490896	24491559	peli1b
peak86231	681.473	0.70603	0.195968	3.60279	0.000314822	0.0393915	chr17	24490896	24491559	ugp2b
peak86271	31.5135	3.67033	0.919531	3.99153	6.56483e-05	0.0120343	chr17	24627056	24627292	map4k3b
peak86271	31.5135	3.67033	0.919531	3.99153	6.56483e-05	0.0120343	chr17	24627056	24627292	morn2
peak8711	312.091	0.91747	0.257331	3.56533	0.000363401	0.0437831	chr1	45859608	45860201	cab39l
peak8711	312.091	0.91747	0.257331	3.56533	0.000363401	0.0437831	chr1	45859608	45860201	mcf2la
peak87299	515.291	0.814063	0.219507	3.7086	0.000208412	0.0291313	chr17	29124786	29125487	foxg1a
peak87299	515.291	0.814063	0.219507	3.7086	0.000208412	0.0291313	chr17	29124786	29125487	im:7147183
peak887	314.534	0.97883	0.26754	3.65863	0.000253565	0.0338374	chr1	4484399	4484912	spry2
peak888	429.799	0.798616	0.224587	3.55594	0.000376634	0.0448638	chr1	4487808	4488331	spry2
peak889	726.913	0.740725	0.188444	3.93075	8.46815e-05	0.0145401	chr1	4491658	4492354	spry2
peak89713	183.41	1.18116	0.327285	3.60897	0.00030741	0.0385696	chr17	41218708	41219149	bre
peak89713	183.41	1.18116	0.327285	3.60897	0.00030741	0.0385696	chr17	41218708	41219149	fosl2
peak90108	40.6881	3.14954	0.730505	4.31146	1.6218e-05	0.00404129	chr17	43548629	43548940	mrpl35
peak90108	40.6881	3.14954	0.730505	4.31146	1.6218e-05	0.00404129	chr17	43548629	43548940	zfyve28
peak90794	391.133	0.970465	0.233649	4.15351	3.27411e-05	0.00703226	chr17	48155139	48155809	kcnk5a
peak90794	391.133	0.970465	0.233649	4.15351	3.27411e-05	0.00703226	chr17	48155139	48155809	slc39a9
peak90919	400.328	0.894941	0.24739	3.61753	0.000297431	0.0376343	chr17	48995273	48995931	tfb1m
peak90919	400.328	0.894941	0.24739	3.61753	0.000297431	0.0376343	chr17	48995273	48995931	wu:fd99c08
peak9100	195.578	1.12515	0.317097	3.54829	0.000387736	0.0456094	chr1	47556251	47556746	ccdc147
peak9100	195.578	1.12515	0.317097	3.54829	0.000387736	0.0456094	chr1	47556251	47556746	cxcl-c1c
peak91058	56.6437	2.33936	0.600176	3.89778	9.70769e-05	0.0161241	chr17	49876140	49876440	col12a1a
peak91058	56.6437	2.33936	0.600176	3.89778	9.70769e-05	0.0161241	chr17	49876140	49876440	cox7a2a
peak91059	107.12	1.97852	0.439979	4.49684	6.897e-06	0.00206696	chr17	49878875	49879277	col12a1a
peak91059	107.12	1.97852	0.439979	4.49684	6.897e-06	0.00206696	chr17	49878875	49879277	cox7a2a
peak91098	39.8548	3.61124	0.772975	4.67187	2.98472e-06	0.00105328	chr17	50095797	50096292	acyp1
peak91098	39.8548	3.61124	0.772975	4.67187	2.98472e-06	0.00105328	chr17	50095797	50096292	vps39
peak91140	269.503	1.14999	0.285187	4.03241	5.52072e-05	0.0104967	chr17	50351417	50351802	si:ch73-50f9.1
peak91140	269.503	1.14999	0.285187	4.03241	5.52072e-05	0.0104967	chr17	50351417	50351802	zgc:113377
peak91367	23.1496	6.31685	1.50359	4.20118	2.6553e-05	0.00599839	chr17	51638854	51639093	nol10
peak91367	23.1496	6.31685	1.50359	4.20118	2.6553e-05	0.00599839	chr17	51638854	51639093	odc1
peak91368	63.8017	3.02365	0.655875	4.6101	4.02466e-06	0.00131813	chr17	51639426	51639735	nol10
peak91368	63.8017	3.02365	0.655875	4.6101	4.02466e-06	0.00131813	chr17	51639426	51639735	odc1
peak9139	259.613	1.05026	0.298549	3.5179	0.000434984	0.0497922	chr1	47889414	47889868	ccdc147
peak9139	259.613	1.05026	0.298549	3.5179	0.000434984	0.0497922	chr1	47889414	47889868	cxcl-c1c
peak91500	104.82	3.25729	0.470569	6.92203	4.45214e-12	8.95006e-09	chr17	52194997	52195546	esrrb
peak91500	104.82	3.25729	0.470569	6.92203	4.45214e-12	8.95006e-09	chr17	52194997	52195546	tgfb3
peak91608	495.551	0.761394	0.216293	3.5202	0.000431224	0.0495202	chr17	52672871	52673548	meis2a
peak91608	495.551	0.761394	0.216293	3.5202	0.000431224	0.0495202	chr17	52672871	52673548	spred1
peak91919	21.8549	4.83084	1.21299	3.98258	6.81701e-05	0.0123074	chr18	344675	344883	rab27a
peak91919	21.8549	4.83084	1.21299	3.98258	6.81701e-05	0.0123074	chr18	344675	344883	si:ch211-248g20.1
peak92003	165.68	2.352	0.379066	6.20473	5.47917e-10	7.10366e-07	chr18	639086	639509	pygo1
peak92003	165.68	2.352	0.379066	6.20473	5.47917e-10	7.10366e-07	chr18	639086	639509	sdr42e1
peak92009	46.9946	4.60416	0.807254	5.70348	1.17387e-08	9.52496e-06	chr18	660452	660720	pygo1
peak92009	46.9946	4.60416	0.807254	5.70348	1.17387e-08	9.52496e-06	chr18	660452	660720	sdr42e1
peak92024	56.6532	2.75534	0.605915	4.54741	5.43098e-06	0.00170471	chr18	721835	722067	pygo1
peak92024	56.6532	2.75534	0.605915	4.54741	5.43098e-06	0.00170471	chr18	721835	722067	sdr42e1
peak92046	106.243	1.62094	0.445448	3.63889	0.000273816	0.0355255	chr18	785107	785447	pkma
peak92046	106.243	1.62094	0.445448	3.63889	0.000273816	0.0355255	chr18	785107	785447	si:dkey-205h23.2
peak92195	90.1226	4.45985	0.571848	7.79903	6.23871e-15	1.99321e-11	chr18	1542768	1543158	rab27a
peak92195	90.1226	4.45985	0.571848	7.79903	6.23871e-15	1.99321e-11	chr18	1542768	1543158	unc13c
peak9247	193.736	1.18658	0.319515	3.71368	0.000204266	0.0286637	chr1	48692524	48692932	caly
peak9247	193.736	1.18658	0.319515	3.71368	0.000204266	0.0286637	chr1	48692524	48692932	msxb
peak92675	201.176	1.30687	0.332607	3.92918	8.52377e-05	0.0145796	chr18	4212568	4213004	fam168a
peak92675	201.176	1.30687	0.332607	3.92918	8.52377e-05	0.0145796	chr18	4212568	4213004	zbbx
peak92753	212.603	1.38792	0.308848	4.49386	6.99447e-06	0.00208917	chr18	4791947	4792554	zbbx
peak9298	18.3845	5.36107	1.45216	3.69179	0.000222682	0.0306235	chr1	48898804	48899057	si:ch211-281g13.5
peak9298	18.3845	5.36107	1.45216	3.69179	0.000222682	0.0306235	chr1	48898804	48899057	zgc:163136
peak93083	319.241	1.0365	0.259897	3.98811	6.6601e-05	0.012122	chr18	6138272	6138642	otogl
peak93083	319.241	1.0365	0.259897	3.98811	6.6601e-05	0.012122	chr18	6138272	6138642	ptprq
peak93202	146.478	4.43991	0.48139	9.22311	2.88594e-20	2.19135e-16	chr18	6675557	6675979	fam168a
peak93203	37.7322	4.79295	0.963336	4.97536	6.51257e-07	0.000296488	chr18	6676442	6676677	fam168a
peak9322	40.5273	3.35453	0.765092	4.38448	1.16264e-05	0.00308042	chr1	49028496	49029059	lef1
peak9322	40.5273	3.35453	0.765092	4.38448	1.16264e-05	0.00308042	chr1	49028496	49029059	tsga10
peak9352	157.679	1.58332	0.36197	4.37417	1.21898e-05	0.00318454	chr1	49134929	49135498	lef1
peak9352	157.679	1.58332	0.36197	4.37417	1.21898e-05	0.00318454	chr1	49134929	49135498	tsga10
peak93802	209.553	1.55572	0.31379	4.95785	7.12758e-07	0.000321217	chr18	9442631	9443283	sema3ab
peak93802	209.553	1.55572	0.31379	4.95785	7.12758e-07	0.000321217	chr18	9442631	9443283	sema3e
peak94004	992.92	0.583843	0.163716	3.5662	0.000362196	0.0436968	chr18	10414988	10415722	hgfb
peak94004	992.92	0.583843	0.163716	3.5662	0.000362196	0.0436968	chr18	10414988	10415722	pclob
peak9424	122.246	1.6274	0.398715	4.08161	4.47251e-05	0.00904179	chr1	49441399	49441954	npnt
peak94269	17.1346	5.08436	1.41856	3.58416	0.000338162	0.0415538	chr18	11713496	11713810	tspan9a
peak94269	17.1346	5.08436	1.41856	3.58416	0.000338162	0.0415538	chr18	11713496	11713810	zgc:110789
peak94338	50.7103	4.03402	0.735667	5.48349	4.17022e-08	2.82619e-05	chr18	11954008	11954462	tspan9a
peak94338	50.7103	4.03402	0.735667	5.48349	4.17022e-08	2.82619e-05	chr18	11954008	11954462	zgc:110789
peak9437	20.9165	6.44121	1.62022	3.97551	7.02296e-05	0.0126537	chr1	49481503	49481788	aimp1
peak9437	20.9165	6.44121	1.62022	3.97551	7.02296e-05	0.0126537	chr1	49481503	49481788	npnt
peak94383	122.719	2.44389	0.412051	5.93103	3.01036e-09	3.0954e-06	chr18	12166813	12167355	bicd1a
peak94383	122.719	2.44389	0.412051	5.93103	3.01036e-09	3.0954e-06	chr18	12166813	12167355	fgd4a
peak94384	64.3493	2.21737	0.553598	4.00537	6.19196e-05	0.0114446	chr18	12168478	12168987	bicd1a
peak94384	64.3493	2.21737	0.553598	4.00537	6.19196e-05	0.0114446	chr18	12168478	12168987	fgd4a
peak94387	588.715	0.884988	0.198568	4.45685	8.31746e-06	0.00241186	chr18	12178551	12179452	bicd1a
peak94387	588.715	0.884988	0.198568	4.45685	8.31746e-06	0.00241186	chr18	12178551	12179452	fgd4a
peak9475	60.1165	2.31921	0.57489	4.03418	5.47937e-05	0.0104405	chr1	49675528	49675986	dkk2
peak9475	60.1165	2.31921	0.57489	4.03418	5.47937e-05	0.0104405	chr1	49675528	49675986	tbck
peak94822	134.387	1.46372	0.380959	3.84221	0.000121931	0.019036	chr18	13930302	13930787	cdh13
peak94822	134.387	1.46372	0.380959	3.84221	0.000121931	0.019036	chr18	13930302	13930787	mlycd
peak94982	50.1664	2.73311	0.671818	4.06822	4.73733e-05	0.00943852	chr18	14714017	14714329	pdf
peak94982	50.1664	2.73311	0.671818	4.06822	4.73733e-05	0.00943852	chr18	14714017	14714329	vps9d1
peak9502	19.4571	7.75239	1.73827	4.45982	8.20297e-06	0.0023864	chr1	49805484	49805649	dkk2
peak9502	19.4571	7.75239	1.73827	4.45982	8.20297e-06	0.0023864	chr1	49805484	49805649	papss1
peak9504	133.746	1.46008	0.384178	3.80052	0.00014439	0.0217271	chr1	49805981	49806363	dkk2
peak9504	133.746	1.46008	0.384178	3.80052	0.00014439	0.0217271	chr1	49805981	49806363	papss1
peak95296	481.498	2.2807	0.235286	9.69332	3.21904e-22	3.48312e-18	chr18	16042745	16043505	itpr2
peak95296	481.498	2.2807	0.235286	9.69332	3.21904e-22	3.48312e-18	chr18	16042745	16043505	sspn
peak9533	372.255	0.979242	0.256707	3.81463	0.00013639	0.020821	chr1	49967000	49967439	ppm1k
peak9533	372.255	0.979242	0.256707	3.81463	0.00013639	0.020821	chr1	49967000	49967439	si:ch73-190m4.1
peak9534	35.2635	5.35608	1.0627	5.04008	4.65343e-07	0.000223209	chr1	49970000	49970469	si:ch73-190m4.1
peak9558	91.2372	1.6265	0.458947	3.54399	0.000394123	0.0460879	chr1	50050094	50050497	fam13a
peak9558	91.2372	1.6265	0.458947	3.54399	0.000394123	0.0460879	chr1	50050094	50050497	herc3
peak96022	90.1593	2.42636	0.51037	4.75411	1.99318e-06	0.000760361	chr18	19178677	19179006	megf11
peak96022	90.1593	2.42636	0.51037	4.75411	1.99318e-06	0.000760361	chr18	19178677	19179006	rab11a
peak9691	18.2301	4.60975	1.27414	3.61794	0.000296956	0.0376274	chr1	50488371	50488619	jag1a
peak9691	18.2301	4.60975	1.27414	3.61794	0.000296956	0.0376274	chr1	50488371	50488619	srd5a2a
peak9703	431.374	0.908295	0.225776	4.023	5.74614e-05	0.0108486	chr1	50535971	50536641	esf1
peak9703	431.374	0.908295	0.225776	4.023	5.74614e-05	0.0108486	chr1	50535971	50536641	jag1a
peak9794	33.0234	2.81088	0.789521	3.56024	0.000370523	0.0444317	chr1	50884991	50885263	etaa1
peak9794	33.0234	2.81088	0.789521	3.56024	0.000370523	0.0444317	chr1	50884991	50885263	meis4.1a
peak98198	22.6077	3.8435	1.03677	3.70718	0.000209584	0.0292038	chr18	28520681	28521033	maf
peak98198	22.6077	3.8435	1.03677	3.70718	0.000209584	0.0292038	chr18	28520681	28521033	spon1a
peak98270	49.6949	2.4989	0.6413	3.89662	9.75433e-05	0.0161592	chr18	29196784	29197216	maf
peak98270	49.6949	2.4989	0.6413	3.89662	9.75433e-05	0.0161592	chr18	29196784	29197216	spon1a
peak98433	90.317	2.70267	0.508696	5.31293	1.07877e-07	6.49859e-05	chr18	30044513	30044804	si:ch211-220f16.2
peak98548	785.214	0.674719	0.18051	3.73785	0.000185598	0.0265438	chr18	30476751	30477859	gins2
peak98548	785.214	0.674719	0.18051	3.73785	0.000185598	0.0265438	chr18	30476751	30477859	si:ch211-220f16.2
peak98830	167.146	5.58536	0.511171	10.9266	8.60153e-28	2.5649e-23	chr18	32838879	32839265	olfcg1
peak98830	167.146	5.58536	0.511171	10.9266	8.60153e-28	2.5649e-23	chr18	32838879	32839265	olfcg6
peak99028	145.952	1.49749	0.417187	3.58951	0.000331306	0.0409582	chr18	34389703	34390250	kcnab1
peak99028	145.952	1.49749	0.417187	3.58951	0.000331306	0.0409582	chr18	34389703	34390250	ssr3
peak99209	35.104	3.18886	0.804173	3.9654	7.32741e-05	0.0130392	chr18	35224879	35225258	ccdc19
peak99209	35.104	3.18886	0.804173	3.9654	7.32741e-05	0.0130392	chr18	35224879	35225258	tbrg1
peak99445	269.071	1.08314	0.275025	3.93833	8.20511e-05	0.0141975	chr18	36678549	36679161	capn12
peak9972	19.0282	4.62567	1.25877	3.67475	0.000238078	0.0323676	chr1	51584614	51584947	cnn1a
peak9972	19.0282	4.62567	1.25877	3.67475	0.000238078	0.0323676	chr1	51584614	51584947	pld6
peak9975	137.941	2.1929	0.383946	5.71148	1.12001e-08	9.23437e-06	chr1	51603574	51604057	cnn1a
peak9975	137.941	2.1929	0.383946	5.71148	1.12001e-08	9.23437e-06	chr1	51603574	51604057	si:dkey-121b10.7
peak9989	267.881	5.29442	0.855678	6.18739	6.11671e-10	7.70684e-07	chr1	51650065	51650903	cnn1a
peak9989	267.881	5.29442	0.855678	6.18739	6.11671e-10	7.70684e-07	chr1	51650065	51650903	si:dkey-121b10.7
peak9997	27.2404	3.95357	0.995091	3.97308	7.09506e-05	0.0127579	chr1	51683745	51684023	si:dkey-121b10.7
peak9997	27.2404	3.95357	0.995091	3.97308	7.09506e-05	0.0127579	chr1	51683745	51684023	zgc:194101

## Sheet: DOWN_peaks
peak	baseMean	log2FoldChange	lfcSE	stat	pvalue	padj	chr	start	end	gene
peak10047	42.7851	-3.34716	0.744013	-4.49879	6.83402e-06	0.00205309	chr1	51905720	51906109	abca1a
peak10047	42.7851	-3.34716	0.744013	-4.49879	6.83402e-06	0.00205309	chr1	51905720	51906109	tacr3l
peak10097	48.9406	-3.97164	0.756531	-5.24981	1.5226e-07	8.62077e-05	chr1	52119095	52119460	osbp
peak10097	48.9406	-3.97164	0.756531	-5.24981	1.5226e-07	8.62077e-05	chr1	52119095	52119460	patl1
peak101427	32.6188	-3.43647	0.834668	-4.11716	3.83563e-05	0.00802633	chr18	45860591	45860893	abcc5
peak101427	32.6188	-3.43647	0.834668	-4.11716	3.83563e-05	0.00802633	chr18	45860591	45860893	ap2m1a
peak103179	62.1985	-2.52565	0.571703	-4.41775	9.97315e-06	0.00277503	chr19	1894574	1894896	ptk2.2
peak103179	62.1985	-2.52565	0.571703	-4.41775	9.97315e-06	0.00277503	chr19	1894574	1894896	rplp1
peak103193	21.774	-7.8966	1.70918	-4.62011	3.83532e-06	0.00128501	chr19	1958905	1959249	ggcta
peak103193	21.774	-7.8966	1.70918	-4.62011	3.83532e-06	0.00128501	chr19	1958905	1959249	si:ch211-149a19.3
peak103195	49.3481	-2.38165	0.642988	-3.70404	0.000212192	0.0294755	chr19	1960149	1960533	ggcta
peak103195	49.3481	-2.38165	0.642988	-3.70404	0.000212192	0.0294755	chr19	1960149	1960533	si:ch211-149a19.3
peak103362	78.4769	-2.20695	0.504593	-4.37372	1.22146e-05	0.00318454	chr19	2541541	2541869	nedd9
peak103362	78.4769	-2.20695	0.504593	-4.37372	1.22146e-05	0.00318454	chr19	2541541	2541869	sp8a
peak106186	51.8552	-2.47294	0.627173	-3.943	8.04698e-05	0.0140051	chr19	17424473	17424723	clic1
peak106186	51.8552	-2.47294	0.627173	-3.943	8.04698e-05	0.0140051	chr19	17424473	17424723	sf3a3
peak107622	25.6738	-3.976	1.02278	-3.88744	0.000101306	0.0165109	chr19	25408016	25408290	eya3
peak107622	25.6738	-3.976	1.02278	-3.88744	0.000101306	0.0165109	chr19	25408016	25408290	xkr8.3
peak107694	73.1197	-6.18692	0.876497	-7.05869	1.68077e-12	3.71231e-09	chr19	25782581	25782899	glcci1
peak107694	73.1197	-6.18692	0.876497	-7.05869	1.68077e-12	3.71231e-09	chr19	25782581	25782899	ptp4a3
peak107695	36.5692	-3.05063	0.769335	-3.96529	7.33079e-05	0.0130392	chr19	25782973	25783266	glcci1
peak107695	36.5692	-3.05063	0.769335	-3.96529	7.33079e-05	0.0130392	chr19	25782973	25783266	ptp4a3
peak10773	54.4186	-2.61492	0.679642	-3.84749	0.000119335	0.0187288	chr1	55505395	55505999	c3a
peak10773	54.4186	-2.61492	0.679642	-3.84749	0.000119335	0.0187288	chr1	55505395	55505999	si:dkey-76b14.5
peak10782	199.478	-4.40588	0.421303	-10.4578	1.3502e-25	2.41571e-21	chr1	55532425	55533030	c3a
peak10782	199.478	-4.40588	0.421303	-10.4578	1.3502e-25	2.41571e-21	chr1	55532425	55533030	zgc:65894
peak108175	61.7299	-2.52882	0.573257	-4.41131	1.02747e-05	0.0028277	chr19	27899730	27900120	atat1
peak108175	61.7299	-2.52882	0.573257	-4.41131	1.02747e-05	0.0028277	chr19	27899730	27900120	si:dkeyp-46h3.8
peak108195	32.9324	-3.31323	0.846367	-3.91465	9.05338e-05	0.0152093	chr19	27980197	27980551	si:dkeyp-46h3.6
peak108226	47.1224	-3.0094	0.683365	-4.4038	1.06372e-05	0.00288795	chr19	28203417	28203643	adcy2b
peak108226	47.1224	-3.0094	0.683365	-4.4038	1.06372e-05	0.00288795	chr19	28203417	28203643	papd7
peak108355	23.9486	-3.53828	1.00253	-3.52934	0.000416602	0.0479951	chr19	28714856	28715100	lpcat1
peak108355	23.9486	-3.53828	1.00253	-3.52934	0.000416602	0.0479951	chr19	28714856	28715100	si:dkey-261i16.5
peak109237	62.4011	-2.94864	0.670214	-4.39955	1.08475e-05	0.00292726	chr19	32356952	32357289	zbtb10
peak109237	62.4011	-2.94864	0.670214	-4.39955	1.08475e-05	0.00292726	chr19	32356952	32357289	zgc:103761
peak109663	54.1321	-2.70854	0.732732	-3.6965	0.000218593	0.0302004	chr19	34025672	34026067	runx1t1
peak109663	54.1321	-2.70854	0.732732	-3.6965	0.000218593	0.0302004	chr19	34025672	34026067	triqk
peak110467	125.011	-1.71994	0.411335	-4.18135	2.89781e-05	0.00640077	chr19	37517876	37518250	cx30.9
peak111705	144.676	-1.48697	0.41879	-3.55063	0.000384306	0.0453296	chr19	43369054	43369468	dclk3
peak111705	144.676	-1.48697	0.41879	-3.55063	0.000384306	0.0453296	chr19	43369054	43369468	zgc:153061
peak11286	63.9512	-2.67975	0.581141	-4.61119	4.00376e-06	0.00131813	chr10	80124	80407	dscr3
peak11286	63.9512	-2.67975	0.581141	-4.61119	4.00376e-06	0.00131813	chr10	80124	80407	ttc3
peak11337	84.8252	-4.44921	0.587209	-7.57687	3.53992e-14	9.89601e-11	chr10	220151	220583	lrrc32
peak11337	84.8252	-4.44921	0.587209	-7.57687	3.53992e-14	9.89601e-11	chr10	220151	220583	mpzl1l
peak11338	24.4089	-3.954	1.02401	-3.86127	0.000112799	0.0179709	chr10	220634	220893	lrrc32
peak11338	24.4089	-3.954	1.02401	-3.86127	0.000112799	0.0179709	chr10	220634	220893	mpzl1l
peak11340	110.88	-2.73015	0.439127	-6.21723	5.06023e-10	6.657e-07	chr10	223679	224000	lrrc32
peak11340	110.88	-2.73015	0.439127	-6.21723	5.06023e-10	6.657e-07	chr10	223679	224000	mpzl1l
peak11341	104.456	-2.64286	0.447835	-5.90141	3.60417e-09	3.58244e-06	chr10	225658	226150	lrrc32
peak11341	104.456	-2.64286	0.447835	-5.90141	3.60417e-09	3.58244e-06	chr10	225658	226150	mpzl1l
peak113637	85.4302	-7.70949	1.80331	-4.27519	1.90977e-05	0.00458025	chr2	3151242	3151575	ipp
peak113637	85.4302	-7.70949	1.80331	-4.27519	1.90977e-05	0.00458025	chr2	3151242	3151575	pik3r3a
peak113644	351.107	-1.66084	0.250535	-6.62918	3.37566e-11	5.80727e-08	chr2	3203726	3204248	guk1a
peak113644	351.107	-1.66084	0.250535	-6.62918	3.37566e-11	5.80727e-08	chr2	3203726	3204248	zgc:63882
peak113757	70.9049	-1.96836	0.522523	-3.76703	0.0001652	0.0241675	chr2	3721465	3721921	c1ql3b
peak113757	70.9049	-1.96836	0.522523	-3.76703	0.0001652	0.0241675	chr2	3721465	3721921	gpt2l
peak113889	49.5047	-3.53999	0.697998	-5.07163	3.94419e-07	0.000193867	chr2	4329801	4330626	gata6
peak113930	64.7824	-4.98063	0.726931	-6.85159	7.30356e-12	1.40507e-08	chr2	4531602	4531907	cables1
peak11397	26.1652	-8.16152	1.66768	-4.89394	9.88381e-07	0.000423053	chr10	402218	402458	zdhhc8a
peak11397	26.1652	-8.16152	1.66768	-4.89394	9.88381e-07	0.000423053	chr10	402218	402458	zgc:56039
peak114361	23.787	-4.81894	1.1946	-4.03392	5.48533e-05	0.0104405	chr2	7099110	7099435	cdc14aa
peak114361	23.787	-4.81894	1.1946	-4.03392	5.48533e-05	0.0104405	chr2	7099110	7099435	ddr2b
peak114364	93.5533	-1.79029	0.467013	-3.83349	0.000126336	0.01957	chr2	7109027	7109369	cdc14aa
peak114364	93.5533	-1.79029	0.467013	-3.83349	0.000126336	0.01957	chr2	7109027	7109369	ddr2b
peak114749	33.5782	-3.97227	0.870113	-4.56523	4.98939e-06	0.00159123	chr2	9704587	9704919	cope
peak114749	33.5782	-3.97227	0.870113	-4.56523	4.98939e-06	0.00159123	chr2	9704587	9704919	st6galnac3
peak116540	87.7571	-3.89971	0.552603	-7.05699	1.70142e-12	3.71231e-09	chr2	21049336	21049762	dusp12
peak116540	87.7571	-3.89971	0.552603	-7.05699	1.70142e-12	3.71231e-09	chr2	21049336	21049762	rxrga
peak116690	65.2737	-2.16384	0.572558	-3.77924	0.000157305	0.0232597	chr2	21727650	21728090	ctdsplb
peak116690	65.2737	-2.16384	0.572558	-3.77924	0.000157305	0.0232597	chr2	21727650	21728090	plcd1b
peak120215	67.7961	-3.53426	0.634914	-5.56652	2.59879e-08	1.87485e-05	chr2	37878767	37879201	mettl17
peak120215	67.7961	-3.53426	0.634914	-5.56652	2.59879e-08	1.87485e-05	chr2	37878767	37879201	si:ch211-284o19.8
peak120704	237.119	-1.3585	0.346974	-3.91527	9.03022e-05	0.0151989	chr2	40084755	40085315	epha4a
peak120704	237.119	-1.3585	0.346974	-3.91527	9.03022e-05	0.0151989	chr2	40084755	40085315	slc25a36a
peak121900	46.5537	-6.70649	1.24118	-5.40333	6.54155e-08	4.28711e-05	chr2	45283835	45284088	eif4e2
peak123714	20.2061	-5.30997	1.37786	-3.85379	0.000116304	0.0183497	chr2	55433808	55434114	NA
peak123802	87.9026	-2.16058	0.489431	-4.41447	1.01258e-05	0.00280877	chr2	55897547	55897942	jund
peak123802	87.9026	-2.16058	0.489431	-4.41447	1.01258e-05	0.00280877	chr2	55897547	55897942	loxl5b
peak123957	41.8891	-3.82254	0.77533	-4.93021	8.21397e-07	0.000360197	chr2	56854681	56855160	pip5k1cb
peak123957	41.8891	-3.82254	0.77533	-4.93021	8.21397e-07	0.000360197	chr2	56854681	56855160	slc25a42
peak124420	100.352	-2.20154	0.451142	-4.87993	1.06126e-06	0.000452811	chr2	59048373	59048709	ftr65
peak124422	25.3797	-5.81393	1.35598	-4.28763	1.80586e-05	0.00437207	chr2	59060530	59060765	NA
peak124427	81.1571	-3.21543	0.53555	-6.00397	1.92552e-09	2.07533e-06	chr2	59108112	59108471	ftr30
peak124428	53.2076	-5.7155	0.925537	-6.17533	6.60239e-10	8.20324e-07	chr2	59111588	59111953	ftr30
peak124439	26.3471	-5.92998	1.35627	-4.37227	1.22959e-05	0.00319453	chr2	59206128	59206372	ftr35
peak12523	33.608	-3.60433	0.860961	-4.18641	2.83405e-05	0.00630977	chr10	5950753	5951031	hmgcs1
peak12523	33.608	-3.60433	0.860961	-4.18641	2.83405e-05	0.00630977	chr10	5950753	5951031	map3k1
peak125869	29.3523	-3.42173	0.949952	-3.60201	0.000315771	0.0394802	chr20	7247012	7247343	dhcr24
peak125869	29.3523	-3.42173	0.949952	-3.60201	0.000315771	0.0394802	chr20	7247012	7247343	dsc2l
peak125983	68.8069	-2.04404	0.573699	-3.56291	0.00036676	0.0440987	chr20	7806789	7807096	ppap2b
peak125983	68.8069	-2.04404	0.573699	-3.56291	0.00036676	0.0440987	chr20	7806789	7807096	si:ch211-257m21.2
peak12603	36.1204	-3.02841	0.783828	-3.86361	0.000111724	0.0178475	chr10	6425738	6426200	ca9
peak12603	36.1204	-3.02841	0.783828	-3.86361	0.000111724	0.0178475	chr10	6425738	6426200	zgc:114200
peak126160	52.5521	-3.54848	0.676561	-5.24488	1.56386e-07	8.74368e-05	chr20	8534832	8535352	mysm1
peak126160	52.5521	-3.54848	0.676561	-5.24488	1.56386e-07	8.74368e-05	chr20	8534832	8535352	prkaa2
peak127022	46.8655	-2.99817	0.726407	-4.12739	3.66901e-05	0.00773193	chr20	15202567	15202945	fmo5
peak127022	46.8655	-2.99817	0.726407	-4.12739	3.66901e-05	0.00773193	chr20	15202567	15202945	si:dkey-239i20.2
peak127519	24.7203	-4.90241	1.20779	-4.059	4.9284e-05	0.00972177	chr20	17958534	17958777	aqp4
peak127519	24.7203	-4.90241	1.20779	-4.059	4.9284e-05	0.00972177	chr20	17958534	17958777	cdh2
peak127673	80.4165	-1.74233	0.488379	-3.56757	0.000360305	0.0435862	chr20	18651852	18652264	cdc42bpb
peak127673	80.4165	-1.74233	0.488379	-3.56757	0.000360305	0.0435862	chr20	18651852	18652264	tnfaip2a
peak127711	49.1215	-4.32678	0.784621	-5.51449	3.49795e-08	2.44467e-05	chr20	18815537	18816027	eif5
peak127711	49.1215	-4.32678	0.784621	-5.51449	3.49795e-08	2.44467e-05	chr20	18815537	18816027	enpp5
peak127950	56.4259	-4.30877	0.709316	-6.07454	1.24346e-09	1.41703e-06	chr20	20170269	20170567	kcnh5a
peak127950	56.4259	-4.30877	0.709316	-6.07454	1.24346e-09	1.41703e-06	chr20	20170269	20170567	ptk2bb
peak128044	16.76	-6.11878	1.6808	-3.6404	0.000272211	0.0354306	chr20	20557427	20557648	prkchb
peak128044	16.76	-6.11878	1.6808	-3.6404	0.000272211	0.0354306	chr20	20557427	20557648	six4b
peak128098	47.2653	-2.57573	0.665509	-3.87031	0.000108695	0.0174571	chr20	20715554	20715828	ppm1ab
peak128099	61.0257	-7.00352	1.17283	-5.97148	2.35105e-09	2.44557e-06	chr20	20715993	20716284	ppm1ab
peak12811	109.85	-3.93899	0.492236	-8.00224	1.22177e-15	4.55401e-12	chr10	7884620	7885038	inpp5ja
peak12811	109.85	-3.93899	0.492236	-8.00224	1.22177e-15	4.55401e-12	chr10	7884620	7885038	mat2aa
peak128185	43.2182	-3.57685	0.754947	-4.73789	2.15956e-06	0.000811717	chr20	21035721	21035928	btbd6b
peak128468	39.3414	-6.29071	1.24686	-5.04524	4.52948e-07	0.000217869	chr20	22079803	22080096	daam1b
peak128468	39.3414	-6.29071	1.24686	-5.04524	4.52948e-07	0.000217869	chr20	22079803	22080096	nmu
peak128776	783.511	-1.29231	0.179511	-7.19907	6.06264e-13	1.46581e-09	chr20	23333487	23334323	ociad1
peak128776	783.511	-1.29231	0.179511	-7.19907	6.06264e-13	1.46581e-09	chr20	23333487	23334323	sgcb
peak128830	162.549	-2.56302	0.362741	-7.06572	1.59788e-12	3.57356e-09	chr20	23551802	23552427	anapc4
peak128830	162.549	-2.56302	0.362741	-7.06572	1.59788e-12	3.57356e-09	chr20	23551802	23552427	slc10a4
peak129049	121.032	-5.24358	0.56574	-9.26853	1.88737e-20	1.608e-16	chr20	24477508	24477864	epha7
peak129049	121.032	-5.24358	0.56574	-9.26853	1.88737e-20	1.608e-16	chr20	24477508	24477864	pdgfra
peak129254	141.709	-2.03717	0.3771	-5.40221	6.58235e-08	4.29811e-05	chr20	25323992	25324303	moxd1
peak12931	33.1319	-3.64061	0.845047	-4.30818	1.64605e-05	0.00407899	chr10	8512829	8513062	pptc7b
peak12931	33.1319	-3.64061	0.845047	-4.30818	1.64605e-05	0.00407899	chr10	8512829	8513062	si:ch211-193e13.5
peak129326	27.99	-4.17467	0.980366	-4.25828	2.06006e-05	0.00487534	chr20	25607082	25607358	cyp2n13
peak129326	27.99	-4.17467	0.980366	-4.25828	2.06006e-05	0.00487534	chr20	25607082	25607358	si:dkey-183n20.15
peak129481	275.131	-1.94634	0.278301	-6.99364	2.67842e-12	5.70487e-09	chr20	26459332	26459764	esr1
peak129481	275.131	-1.94634	0.278301	-6.99364	2.67842e-12	5.70487e-09	chr20	26459332	26459764	syne1a
peak130582	64.5507	-2.2093	0.601618	-3.67226	0.000240415	0.0325123	chr20	30710492	30710998	acbd3
peak130582	64.5507	-2.2093	0.601618	-3.67226	0.000240415	0.0325123	chr20	30710492	30710998	ccr6a
peak131413	38.7677	-3.2213	0.760221	-4.23733	2.26198e-05	0.00526271	chr20	34273093	34273375	arpc5b
peak131413	38.7677	-3.2213	0.760221	-4.23733	2.26198e-05	0.00526271	chr20	34273093	34273375	hmcn1
peak131667	39.0684	-3.74424	0.792063	-4.7272	2.27641e-06	0.000846866	chr20	35182228	35182426	si:ch211-89p3.3
peak131891	52.497	-2.39081	0.623719	-3.83316	0.000126508	0.0195797	chr20	36513173	36513422	lbr
peak132216	16.8668	-7.52804	1.77912	-4.23132	2.32319e-05	0.0053911	chr20	37935411	37935642	flvcr1
peak132216	16.8668	-7.52804	1.77912	-4.23132	2.32319e-05	0.0053911	chr20	37935411	37935642	tatdn3
peak132221	125.808	-5.40346	0.570974	-9.46357	2.97603e-21	2.80241e-17	chr20	37953403	37954090	flvcr1
peak132221	125.808	-5.40346	0.570974	-9.46357	2.97603e-21	2.80241e-17	chr20	37953403	37954090	vash2
peak133132	109.547	-2.98383	0.447674	-6.66517	2.64354e-11	4.63695e-08	chr20	42993600	42993952	pomcb
peak133132	109.547	-2.98383	0.447674	-6.66517	2.64354e-11	4.63695e-08	chr20	42993600	42993952	si:ch211-215m21.14
peak133163	33.3544	-4.6805	0.968782	-4.83133	1.35627e-06	0.000554011	chr20	43128924	43129210	pomcb
peak133163	33.3544	-4.6805	0.968782	-4.83133	1.35627e-06	0.000554011	chr20	43128924	43129210	snx9b
peak134726	55.6246	-2.88446	0.623248	-4.62812	3.69002e-06	0.00124566	chr20	52179223	52179620	hlx1
peak134726	55.6246	-2.88446	0.623248	-4.62812	3.69002e-06	0.00124566	chr20	52179223	52179620	si:ch211-180b22.4
peak135338	117.647	-4.38297	0.502625	-8.72017	2.77797e-18	1.48639e-14	chr21	146111	146643	gsdf
peak135338	117.647	-4.38297	0.502625	-8.72017	2.77797e-18	1.48639e-14	chr21	146111	146643	plgrkt
peak135339	56.3216	-2.38333	0.606026	-3.93272	8.39899e-05	0.014463	chr21	146922	147228	gsdf
peak135339	56.3216	-2.38333	0.606026	-3.93272	8.39899e-05	0.014463	chr21	146922	147228	plgrkt
peak135805	22.0873	-4.01403	1.08616	-3.69562	0.000219351	0.0302817	chr21	2117752	2118019	gb:ai877918
peak135805	22.0873	-4.01403	1.08616	-3.69562	0.000219351	0.0302817	chr21	2117752	2118019	si:rp71-1h20.5
peak135812	83.3431	-3.29734	0.540561	-6.09985	1.06171e-09	1.23348e-06	chr21	2143700	2144006	gb:ai877918
peak135812	83.3431	-3.29734	0.540561	-6.09985	1.06171e-09	1.23348e-06	chr21	2143700	2144006	zgc:163077
peak135853	86.4812	-2.16929	0.485208	-4.47083	7.79151e-06	0.00229657	chr21	2319198	2319533	zgc:193790
peak137836	71.6017	-2.36911	0.530649	-4.46456	8.02351e-06	0.00234563	chr21	12656748	12657148	celf4
peak137836	71.6017	-2.36911	0.530649	-4.46456	8.02351e-06	0.00234563	chr21	12656748	12657148	si:dkey-228b2.5
peak137909	33.5067	-2.92404	0.79222	-3.69094	0.000223424	0.0306783	chr21	12971949	12972391	si:dkey-228b2.5
peak137909	33.5067	-2.92404	0.79222	-3.69094	0.000223424	0.0306783	chr21	12971949	12972391	zgc:109965
peak138863	63.9258	-1.96938	0.550745	-3.57585	0.000349091	0.0425714	chr21	17753955	17754256	rxraa
peak138863	63.9258	-1.96938	0.550745	-3.57585	0.000349091	0.0425714	chr21	17753955	17754256	stx2a
peak139021	171.26	-2.09121	0.358057	-5.84044	5.20621e-09	4.98112e-06	chr21	18239201	18239528	si:dkeyp-116h7.3
peak139021	171.26	-2.09121	0.358057	-5.84044	5.20621e-09	4.98112e-06	chr21	18239201	18239528	smpd4
peak139027	19.8217	-4.20644	1.16347	-3.61544	0.000299842	0.0378966	chr21	18265832	18266152	si:dkeyp-116h7.3
peak139027	19.8217	-4.20644	1.16347	-3.61544	0.000299842	0.0378966	chr21	18265832	18266152	smpd4
peak139278	20.5371	-5.30511	1.36491	-3.88677	0.000101585	0.0165109	chr21	19396526	19396871	c1qtnf3
peak139278	20.5371	-5.30511	1.36491	-3.88677	0.000101585	0.0165109	chr21	19396526	19396871	slc45a2
peak139381	48.6451	-4.9938	0.843091	-5.92321	3.15725e-09	3.22789e-06	chr21	19837020	19837315	mfhas1
peak139381	48.6451	-4.9938	0.843091	-5.92321	3.15725e-09	3.22789e-06	chr21	19837020	19837315	nnt
peak139492	22.9232	-4.62033	1.216	-3.79962	0.00014492	0.0217885	chr21	20343079	20343336	atp5ia
peak139492	22.9232	-4.62033	1.216	-3.79962	0.00014492	0.0217885	chr21	20343079	20343336	hspb11
peak13982	97.8474	-1.83822	0.517412	-3.55271	0.000381286	0.0451233	chr10	14529617	14529931	galt
peak13982	97.8474	-1.83822	0.517412	-3.55271	0.000381286	0.0451233	chr10	14529617	14529931	sigmar1
peak139963	68.3234	-4.42196	0.654328	-6.75802	1.39891e-11	2.55394e-08	chr21	22340475	22341030	lmbrd2b
peak139963	68.3234	-4.42196	0.654328	-6.75802	1.39891e-11	2.55394e-08	chr21	22340475	22341030	nadk2
peak140002	74.2177	-3.02488	0.556787	-5.43273	5.54974e-08	3.66395e-05	chr21	22517520	22517911	myo5b
peak140002	74.2177	-3.02488	0.556787	-5.43273	5.54974e-08	3.66395e-05	chr21	22517520	22517911	myo5b
peak140028	78.3888	-2.74223	0.516791	-5.30626	1.11896e-07	6.69558e-05	chr21	22669766	22670333	c1qb
peak140028	78.3888	-2.74223	0.516791	-5.30626	1.11896e-07	6.69558e-05	chr21	22669766	22670333	gig2e
peak140032	32.8818	-3.26256	0.831535	-3.92353	8.72596e-05	0.0148263	chr21	22683473	22683798	c1qb
peak140032	32.8818	-3.26256	0.831535	-3.92353	8.72596e-05	0.0148263	chr21	22683473	22683798	c1qc
peak140557	117.665	-1.56041	0.428185	-3.64425	0.00026817	0.0351499	chr21	24715048	24715409	im:7150060
peak140557	117.665	-1.56041	0.428185	-3.64425	0.00026817	0.0351499	chr21	24715048	24715409	jam3b
peak141311	109.983	-3.54116	0.509661	-6.94808	3.70285e-12	7.52836e-09	chr21	28646587	28646929	epdl2
peak141311	109.983	-3.54116	0.509661	-6.94808	3.70285e-12	7.52836e-09	chr21	28646587	28646929	pura
peak141436	166.504	-1.40095	0.345677	-4.05276	5.06159e-05	0.00986486	chr21	29196453	29197074	havcr1
peak141436	166.504	-1.40095	0.345677	-4.05276	5.06159e-05	0.00986486	chr21	29196453	29197074	ttc1
peak141665	180.108	-5.18321	0.471074	-11.003	3.69794e-28	1.32323e-23	chr21	30941560	30942147	pgap2
peak141665	180.108	-5.18321	0.471074	-11.003	3.69794e-28	1.32323e-23	chr21	30941560	30942147	rhogb
peak141858	73.4332	-1.82888	0.511455	-3.57583	0.000349118	0.0425714	chr21	31994648	31994964	mat2b
peak141858	73.4332	-1.82888	0.511455	-3.57583	0.000349118	0.0425714	chr21	31994648	31994964	si:ch211-12m10.1
peak141862	221.378	-1.2725	0.305113	-4.17057	3.03836e-05	0.00665246	chr21	32003268	32003655	mat2b
peak141862	221.378	-1.2725	0.305113	-4.17057	3.03836e-05	0.00665246	chr21	32003268	32003655	si:ch211-12m10.1
peak142049	189.525	-1.48079	0.336749	-4.39731	1.09603e-05	0.00294711	chr21	32821558	32822096	adra2db
peak142049	189.525	-1.48079	0.336749	-4.39731	1.09603e-05	0.00294711	chr21	32821558	32822096	slc34a1b
peak142050	147.66	-3.39163	0.429794	-7.89129	2.99088e-15	1.02907e-11	chr21	32825702	32826108	adra2db
peak142050	147.66	-3.39163	0.429794	-7.89129	2.99088e-15	1.02907e-11	chr21	32825702	32826108	slc34a1b
peak142051	33.1644	-2.98571	0.811039	-3.68134	0.000232014	0.0315912	chr21	32829282	32829540	adra2db
peak142051	33.1644	-2.98571	0.811039	-3.68134	0.000232014	0.0315912	chr21	32829282	32829540	slc34a1b
peak142073	26.2456	-4.09114	0.998621	-4.09679	4.18918e-05	0.00864591	chr21	32993457	32993684	adra2db
peak142073	26.2456	-4.09114	0.998621	-4.09679	4.18918e-05	0.00864591	chr21	32993457	32993684	slc34a1b
peak142229	24.0952	-4.29405	1.08326	-3.964	7.37035e-05	0.0130718	chr21	33908476	33908977	NA
peak142285	145.784	-1.493	0.374253	-3.98929	6.62724e-05	0.0120868	chr21	34136051	34137119	alg13
peak142285	145.784	-1.493	0.374253	-3.98929	6.62724e-05	0.0120868	chr21	34136051	34137119	trpc5b
peak142440	48.4754	-2.37221	0.651235	-3.64263	0.000269867	0.0352948	chr21	34909671	34910120	si:dkey-71d15.2
peak142440	48.4754	-2.37221	0.651235	-3.64263	0.000269867	0.0352948	chr21	34909671	34910120	zgc:91985
peak142710	165.625	-1.60193	0.355264	-4.50911	6.50993e-06	0.00197077	chr21	36863235	36863733	arl10
peak142710	165.625	-1.60193	0.355264	-4.50911	6.50993e-06	0.00197077	chr21	36863235	36863733	cnot8
peak14280	18.1759	-5.42063	1.47987	-3.6629	0.000249375	0.0335213	chr10	16286048	16286329	fbn2a
peak14280	18.1759	-5.42063	1.47987	-3.6629	0.000249375	0.0335213	chr10	16286048	16286329	slc12a2
peak143237	47.3608	-5.79904	1.01421	-5.71779	1.07918e-08	8.98053e-06	chr21	39359149	39359559	pafah1b1b
peak143237	47.3608	-5.79904	1.01421	-5.71779	1.07918e-08	8.98053e-06	chr21	39359149	39359559	si:ch211-274p24.5
peak143315	33.2681	-8.50804	1.62265	-5.24329	1.57739e-07	8.79186e-05	chr21	39860249	39860547	plrdgb
peak143315	33.2681	-8.50804	1.62265	-5.24329	1.57739e-07	8.79186e-05	chr21	39860249	39860547	slc47a1
peak143334	74.9935	-2.01135	0.551596	-3.64641	0.00026593	0.034957	chr21	39941008	39941546	slc47a1
peak143334	74.9935	-2.01135	0.551596	-3.64641	0.00026593	0.034957	chr21	39941008	39941546	slc47a2
peak143815	145.193	-4.11107	0.453195	-9.07131	1.17599e-19	7.7927e-16	chr21	42871644	42872078	gabrg2
peak143815	145.193	-4.11107	0.453195	-9.07131	1.17599e-19	7.7927e-16	chr21	42871644	42872078	stk32a
peak14433	68.8474	-2.90296	0.55617	-5.21955	1.79358e-07	9.63658e-05	chr10	17151525	17152093	fam166b
peak14433	68.8474	-2.90296	0.55617	-5.21955	1.79358e-07	9.63658e-05	chr10	17151525	17152093	slc5a1
peak144777	146.026	-1.35952	0.370174	-3.67266	0.000240037	0.0324857	chr22	1275387	1275816	si:ch73-138e16.4
peak144779	30.1464	-4.30671	1.04799	-4.10951	3.965e-05	0.0082777	chr22	1295021	1295258	si:ch73-138e16.5
peak144779	30.1464	-4.30671	1.04799	-4.10951	3.965e-05	0.0082777	chr22	1295021	1295258	si:ch73-138e16.6
peak144795	44.945	-3.27579	0.709398	-4.61771	3.88005e-06	0.00129515	chr22	1411441	1411730	si:dkeyp-53d3.6
peak144814	28.8264	-8.30064	1.64835	-5.03572	4.76063e-07	0.000227133	chr22	1484622	1484864	si:ch211-255f4.4
peak144814	28.8264	-8.30064	1.64835	-5.03572	4.76063e-07	0.000227133	chr22	1484622	1484864	si:ch211-255f4.4
peak144999	46.6447	-4.22856	0.809182	-5.22572	1.73479e-07	9.37704e-05	chr22	2736041	2736382	si:dkey-20i20.11
peak144999	46.6447	-4.22856	0.809182	-5.22572	1.73479e-07	9.37704e-05	chr22	2736041	2736382	zgc:174919
peak145017	87.2162	-4.3099	0.60955	-7.07062	1.54242e-12	3.49319e-09	chr22	2828425	2828729	si:dkey-20i20.4
peak145042	85.8744	-2.45867	0.496444	-4.95256	7.32418e-07	0.000327015	chr22	2924964	2925587	pigx
peak145079	27.1321	-4.70235	1.06717	-4.40636	1.05123e-05	0.00286707	chr22	3142334	3142792	lonp1
peak145079	27.1321	-4.70235	1.06717	-4.40636	1.05123e-05	0.00286707	chr22	3142334	3142792	rpl36
peak145346	175.689	-3.46216	0.373185	-9.27733	1.73778e-20	1.55457e-16	chr22	4414117	4414606	zgc:195170
peak145347	24.2372	-4.11321	1.11984	-3.67303	0.000239687	0.032463	chr22	4425905	4426135	unm_pku300
peak145347	24.2372	-4.11321	1.11984	-3.67303	0.000239687	0.032463	chr22	4425905	4426135	zgc:195170
peak145349	54.1757	-4.03223	0.732747	-5.50289	3.7361e-08	2.58087e-05	chr22	4433818	4434059	unm_pku300
peak145349	54.1757	-4.03223	0.732747	-5.50289	3.7361e-08	2.58087e-05	chr22	4433818	4434059	zgc:195170
peak145433	31.9678	-3.3334	0.839186	-3.97218	7.12165e-05	0.0127804	chr22	4847175	4847711	cers1
peak145433	31.9678	-3.3334	0.839186	-3.97218	7.12165e-05	0.0127804	chr22	4847175	4847711	ncl1
peak146084	17.8562	-5.18438	1.45575	-3.56131	0.000369007	0.0443094	chr22	9293272	9293533	si:ch211-11p18.1
peak146084	17.8562	-5.18438	1.45575	-3.56131	0.000369007	0.0443094	chr22	9293272	9293533	si:ch211-250k18.6
peak147426	113.761	-1.60081	0.41357	-3.87071	0.000108517	0.0174547	chr22	15678212	15678677	safb
peak147444	44.781	-2.56731	0.672749	-3.81615	0.000135552	0.0207285	chr22	15761925	15762511	fam32al
peak147444	44.781	-2.56731	0.672749	-3.81615	0.000135552	0.0207285	chr22	15761925	15762511	klf2a
peak147464	193.388	-1.41049	0.320744	-4.39757	1.09469e-05	0.00294711	chr22	15877884	15878564	eps15l1a
peak147464	193.388	-1.41049	0.320744	-4.39757	1.09469e-05	0.00294711	chr22	15877884	15878564	klf2a
peak14785	29.4904	-4.8415	1.04694	-4.62444	3.7562e-06	0.00126323	chr10	18963717	18963953	bnip3lb
peak14785	29.4904	-4.8415	1.04694	-4.62444	3.7562e-06	0.00126323	chr10	18963717	18963953	dpysl2b
peak14786	104.467	-2.05149	0.460694	-4.45305	8.46585e-06	0.00243516	chr10	18964433	18964965	bnip3lb
peak14786	104.467	-2.05149	0.460694	-4.45305	8.46585e-06	0.00243516	chr10	18964433	18964965	dpysl2b
peak15007	26.8284	-3.28654	0.908089	-3.61919	0.000295529	0.0375206	chr10	20405141	20405460	golga7
peak15035	139.55	-1.86305	0.383027	-4.86403	1.1502e-06	0.000483451	chr10	20493538	20493897	ddhd2
peak15035	139.55	-1.86305	0.383027	-4.86403	1.1502e-06	0.000483451	chr10	20493538	20493897	loxl2a
peak15049	27.0311	-4.70799	1.06797	-4.40836	1.04157e-05	0.00285206	chr10	20532839	20533071	ddhd2
peak15049	27.0311	-4.70799	1.06797	-4.40836	1.04157e-05	0.00285206	chr10	20532839	20533071	loxl2a
peak15058	176.991	-5.99505	0.555522	-10.7917	3.7657e-27	9.62486e-23	chr10	20553178	20553606	ddhd2
peak15058	176.991	-5.99505	0.555522	-10.7917	3.7657e-27	9.62486e-23	chr10	20553178	20553606	loxl2a
peak151047	147.795	-1.6534	0.365173	-4.52771	5.96271e-06	0.00182362	chr22	36101238	36101763	zgc:110289
peak151047	147.795	-1.6534	0.365173	-4.52771	5.96271e-06	0.00182362	chr22	36101238	36101763	zgc:171550
peak151174	51.6706	-2.74247	0.640439	-4.28218	1.8507e-05	0.0044565	chr22	36687461	36687755	b3gnt7
peak151301	40.8878	-3.68238	0.776875	-4.73999	2.13728e-06	0.000805034	chr22	37206524	37206850	atp11b
peak151301	40.8878	-3.68238	0.776875	-4.73999	2.13728e-06	0.000805034	chr22	37206524	37206850	sox2
peak151433	64.5072	-2.18195	0.556733	-3.91921	8.88385e-05	0.0150311	chr22	37681942	37682209	psmd1
peak151433	64.5072	-2.18195	0.556733	-3.91921	8.88385e-05	0.0150311	chr22	37681942	37682209	ttc14
peak151457	116.828	-1.81521	0.421086	-4.31079	1.62675e-05	0.00404236	chr22	37835946	37836323	acap2
peak151457	116.828	-1.81521	0.421086	-4.31079	1.62675e-05	0.00404236	chr22	37835946	37836323	htr2b
peak151545	34.1607	-3.02268	0.829573	-3.64366	0.000268792	0.0352057	chr22	38303078	38303323	elavl2
peak151545	34.1607	-3.02268	0.829573	-3.64366	0.000268792	0.0352057	chr22	38303078	38303323	si:ch211-284e20.8
peak151548	186.907	-1.53221	0.326967	-4.68611	2.78445e-06	0.00100036	chr22	38320938	38321329	elavl2
peak151548	186.907	-1.53221	0.326967	-4.68611	2.78445e-06	0.00100036	chr22	38320938	38321329	rcor3
peak15177	203.803	-1.32537	0.314113	-4.21939	2.44967e-05	0.00561901	chr10	21163794	21164581	pcdh1a
peak15177	203.803	-1.32537	0.314113	-4.21939	2.44967e-05	0.00561901	chr10	21163794	21164581	si:dkey-106m10.4
peak151891	32.7993	-3.08181	0.860027	-3.58339	0.000339167	0.0416201	chr23	509083	509440	col9a3
peak151891	32.7993	-3.08181	0.860027	-3.58339	0.000339167	0.0416201	chr23	509083	509440	hm13
peak15303	192.945	-1.61286	0.323438	-4.98661	6.14478e-07	0.000283012	chr10	21899205	21899512	pcdh1gc5
peak15303	192.945	-1.61286	0.323438	-4.98661	6.14478e-07	0.000283012	chr10	21899205	21899512	zgc:171684
peak15458	61.7331	-2.34638	0.583316	-4.02248	5.75884e-05	0.0108486	chr10	22565906	22566168	efnb3a
peak15643	125.001	-2.36399	0.407055	-5.80754	6.33961e-09	5.96974e-06	chr10	23336031	23336811	cadm2a
peak15643	125.001	-2.36399	0.407055	-5.80754	6.33961e-09	5.96974e-06	chr10	23336031	23336811	si:dkey-175g6.5
peak15767	131.789	-2.21322	0.394798	-5.60596	2.07106e-08	1.55691e-05	chr10	24004013	24004678	si:ch211-213e17.1
peak15767	131.789	-2.21322	0.394798	-5.60596	2.07106e-08	1.55691e-05	chr10	24004013	24004678	si:dkey-181c13.1
peak16003	63.0937	-4.20293	0.66439	-6.326	2.51602e-10	3.57265e-07	chr10	25386897	25387195	cct8
peak160238	48.0028	-5.54117	0.965314	-5.74028	9.45223e-09	8.37201e-06	chr23	39333989	39334526	kcng1
peak160238	48.0028	-5.54117	0.965314	-5.74028	9.45223e-09	8.37201e-06	chr23	39333989	39334526	sall4
peak160381	15.1871	-7.37655	1.81253	-4.06975	4.70636e-05	0.00939776	chr23	39988426	39988654	ppp1r14c
peak160381	15.1871	-7.37655	1.81253	-4.06975	4.70636e-05	0.00939776	chr23	39988426	39988654	xcr1a
peak162768	33.4742	-4.1004	0.892962	-4.59191	4.39209e-06	0.00142615	chr24	4364883	4365145	ccny
peak162768	33.4742	-4.1004	0.892962	-4.59191	4.39209e-06	0.00142615	chr24	4364883	4365145	fzd8a
peak163064	31.2798	-7.00238	1.53446	-4.56343	5.03243e-06	0.00159845	chr24	5416676	5416946	chst2b
peak163064	31.2798	-7.00238	1.53446	-4.56343	5.03243e-06	0.00159845	chr24	5416676	5416946	plod2
peak163191	175.553	-2.81924	0.358683	-7.85997	3.84236e-15	1.27307e-11	chr24	5994597	5995293	pdss1
peak163278	35.0101	-3.19437	0.788669	-4.05032	5.11467e-05	0.00994663	chr24	6346682	6346928	anxa13
peak163820	106.873	-6.147	0.745176	-8.24905	1.59654e-16	6.34768e-13	chr24	9039020	9039598	dlgap1b
peak163820	106.873	-6.147	0.745176	-8.24905	1.59654e-16	6.34768e-13	chr24	9039020	9039598	tgif1
peak1641	154.49	-1.64569	0.405891	-4.05452	5.02382e-05	0.00982335	chr1	7969528	7969792	actb1
peak164237	30.6793	-4.89923	1.03756	-4.72188	2.33672e-06	0.000858468	chr24	11087108	11087569	myrip
peak164237	30.6793	-4.89923	1.03756	-4.72188	2.33672e-06	0.000858468	chr24	11087108	11087569	prlh2
peak164403	24.6761	-5.60058	1.36738	-4.09585	4.20618e-05	0.00865993	chr24	11989189	11989471	ccr9b
peak164403	24.6761	-5.60058	1.36738	-4.09585	4.20618e-05	0.00865993	chr24	11989189	11989471	fen1
peak164419	15.1619	-7.37448	1.81309	-4.06735	4.75499e-05	0.00946318	chr24	12208902	12209212	ccr9b
peak164419	15.1619	-7.37448	1.81309	-4.06735	4.75499e-05	0.00946318	chr24	12208902	12209212	fen1
peak164681	161.638	-1.43652	0.362676	-3.9609	7.46672e-05	0.0132114	chr24	13873431	13873780	eya1
peak164681	161.638	-1.43652	0.362676	-3.9609	7.46672e-05	0.0132114	chr24	13873431	13873780	xkr9
peak165809	34.526	-3.98186	0.876196	-4.54448	5.5071e-06	0.00172256	chr24	19987725	19988182	oxsr1b
peak165809	34.526	-3.98186	0.876196	-4.54448	5.5071e-06	0.00172256	chr24	19987725	19988182	zgc:153639
peak165913	193.051	-3.04566	0.347027	-8.77644	1.68732e-18	9.73829e-15	chr24	20425305	20425728	hhatlb
peak165913	193.051	-3.04566	0.347027	-8.77644	1.68732e-18	9.73829e-15	chr24	20425305	20425728	klhl40b
peak165962	61.3914	-2.08651	0.573448	-3.63854	0.000274192	0.0355486	chr24	20772186	20772469	si:ch211-161h7.6
peak165962	61.3914	-2.08651	0.573448	-3.63854	0.000274192	0.0355486	chr24	20772186	20772469	zgc:56530
peak166014	223.265	-1.73086	0.303828	-5.69684	1.22048e-08	9.83616e-06	chr24	21030048	21030879	atp6v1ab
peak166014	223.265	-1.73086	0.303828	-5.69684	1.22048e-08	9.83616e-06	chr24	21030048	21030879	naa50
peak166025	13.9982	-7.25563	1.84062	-3.94195	8.08206e-05	0.0140389	chr24	21065551	21065656	boc
peak166025	13.9982	-7.25563	1.84062	-3.94195	8.08206e-05	0.0140389	chr24	21065551	21065656	si:ch73-196k8.2
peak166237	129.087	-4.91696	0.534486	-9.19941	3.59905e-20	2.47663e-16	chr24	21876265	21876624	ropn1l
peak166956	32.4208	-6.0198	1.28633	-4.67984	2.87099e-06	0.0010212	chr24	24939831	24940121	amer2
peak166956	32.4208	-6.0198	1.28633	-4.67984	2.87099e-06	0.0010212	chr24	24939831	24940121	si:dkey-11p10.9
peak167325	33.784	-8.53019	1.62008	-5.26528	1.39977e-07	8.10484e-05	chr24	26806620	26806847	NA
peak167328	44.308	-2.91854	0.697164	-4.18629	2.83546e-05	0.00630977	chr24	26811487	26811961	nceh1b
peak167407	17.5424	-5.20683	1.47269	-3.5356	0.000406857	0.0471151	chr24	27122319	27122572	dip2c
peak167407	17.5424	-5.20683	1.47269	-3.5356	0.000406857	0.0471151	chr24	27122319	27122572	zmynd11
peak167437	19.8021	-4.24323	1.16318	-3.64795	0.000264344	0.0348271	chr24	27282781	27283060	si:dkey-25o1.6
peak167437	19.8021	-4.24323	1.16318	-3.64795	0.000264344	0.0348271	chr24	27282781	27283060	vipr2
peak167446	115.582	-3.11918	0.444018	-7.02489	2.14237e-12	4.6181e-09	chr24	27344428	27344729	si:dkey-25o1.5
peak167446	115.582	-3.11918	0.444018	-7.02489	2.14237e-12	4.6181e-09	chr24	27344428	27344729	si:dkey-25o1.7
peak167450	140.315	-3.67541	0.439526	-8.3622	6.15608e-17	2.56143e-13	chr24	27397425	27398004	si:dkey-25o1.2
peak167456	26.1639	-3.7288	0.966026	-3.85994	0.000113417	0.0180373	chr24	27436251	27436596	ek1
peak167456	26.1639	-3.7288	0.966026	-3.85994	0.000113417	0.0180373	chr24	27436251	27436596	si:ch211-260d11.1
peak167458	146.5	-2.15111	0.393639	-5.46467	4.63765e-08	3.11934e-05	chr24	27447890	27448281	ek1
peak167458	146.5	-2.15111	0.393639	-5.46467	4.63765e-08	3.11934e-05	chr24	27447890	27448281	si:ch211-260d11.1
peak167791	51.6834	-2.30197	0.622165	-3.69993	0.00021566	0.0298723	chr24	28927425	28927788	prmt6
peak167791	51.6834	-2.30197	0.622165	-3.69993	0.00021566	0.0298723	chr24	28927425	28927788	rnpc3
peak168582	146.018	-1.98245	0.372147	-5.32706	9.98137e-08	6.13683e-05	chr24	34004456	34005075	asic1c
peak168909	62.1048	-5.33873	0.798923	-6.68241	2.35047e-11	4.16371e-08	chr24	35591705	35592088	snai2
peak168909	62.1048	-5.33873	0.798923	-6.68241	2.35047e-11	4.16371e-08	chr24	35591705	35592088	ube2v2
peak169037	30.9818	-4.65982	1.01414	-4.59484	4.33072e-06	0.00141273	chr24	36248163	36248465	zgc:103519
peak169042	131.861	-4.53274	0.491371	-9.22468	2.84397e-20	2.19135e-16	chr24	36287058	36287425	pak1ip1
peak169043	130.844	-2.23823	0.397664	-5.62843	1.81858e-08	1.38984e-05	chr24	36307773	36308115	pak1ip1
peak169043	130.844	-2.23823	0.397664	-5.62843	1.81858e-08	1.38984e-05	chr24	36307773	36308115	rbbp8
peak170905	22.9088	-3.64005	1.02399	-3.55477	0.000378303	0.044943	chr25	2870167	2870419	adpgk
peak170905	22.9088	-3.64005	1.02399	-3.55477	0.000378303	0.044943	chr25	2870167	2870419	scamp2
peak171106	52.2023	-2.31717	0.617032	-3.75535	0.000173102	0.0251181	chr25	3829791	3830257	myrf
peak171106	52.2023	-2.31717	0.617032	-3.75535	0.000173102	0.0251181	chr25	3829791	3830257	tmem258
peak171390	618.568	-2.40727	0.231011	-10.4206	1.99746e-25	3.24887e-21	chr25	5212203	5213358	plxnb2b
peak171390	618.568	-2.40727	0.231011	-10.4206	1.99746e-25	3.24887e-21	chr25	5212203	5213358	zgc:101549
peak171545	120.375	-2.15089	0.414727	-5.18627	2.14544e-07	0.000112686	chr25	5985234	5986017	rbpms2a
peak171545	120.375	-2.15089	0.414727	-5.18627	2.14544e-07	0.000112686	chr25	5985234	5986017	sv2
peak172722	47.4307	-2.50068	0.679637	-3.67944	0.000233748	0.031803	chr25	12925073	12925450	ndrg4
peak172722	47.4307	-2.50068	0.679637	-3.67944	0.000233748	0.031803	chr25	12925073	12925450	sept7b
peak172777	89.5858	-1.8094	0.467193	-3.87291	0.000107544	0.0173189	chr25	13396369	13396756	ldhd
peak173693	72.1827	-2.59381	0.541484	-4.79019	1.66621e-06	0.000655323	chr25	17515378	17515663	galnt18a
peak173693	72.1827	-2.59381	0.541484	-4.79019	1.66621e-06	0.000655323	chr25	17515378	17515663	vac14
peak173912	36.6752	-2.84727	0.7532	-3.78023	0.000156682	0.0232059	chr25	18483812	18484032	met
peak174412	32.1117	-3.52394	0.921372	-3.82467	0.000130949	0.0201105	chr25	21174598	21174943	erc1a
peak174412	32.1117	-3.52394	0.921372	-3.82467	0.000130949	0.0201105	chr25	21174598	21174943	zgc:91811
peak175958	427.353	-0.974846	0.23089	-4.22213	2.42003e-05	0.00557246	chr25	30746118	30746664	tnni2a.4
peak175958	427.353	-0.974846	0.23089	-4.22213	2.42003e-05	0.00557246	chr25	30746118	30746664	tnnt3a
peak176278	76.003	-2.62823	0.546753	-4.80698	1.53228e-06	0.000610576	chr25	32348223	32348569	etfa
peak176278	76.003	-2.62823	0.546753	-4.80698	1.53228e-06	0.000610576	chr25	32348223	32348569	isl2a
peak177709	32.1086	-3.57734	0.854137	-4.18826	2.81105e-05	0.00627652	chr3	4642235	4642490	ftr43
peak177709	32.1086	-3.57734	0.854137	-4.18826	2.81105e-05	0.00627652	chr3	4642235	4642490	ftr50
peak177944	104.387	-2.32532	0.442256	-5.25787	1.45734e-07	8.27746e-05	chr3	6149196	6149705	mcoln1b
peak177945	165.165	-7.35509	0.797633	-9.22114	2.93952e-20	2.19135e-16	chr3	6150277	6150636	mcoln1b
peak178106	74.1325	-1.99755	0.540964	-3.69258	0.000221988	0.0305746	chr3	7157247	7157584	sumo2b
peak178106	74.1325	-1.99755	0.540964	-3.69258	0.000221988	0.0305746	chr3	7157247	7157584	zgc:173577
peak178745	20.1525	-4.34718	1.19536	-3.6367	0.00027615	0.0357248	chr3	12034350	12034546	dhps
peak178745	20.1525	-4.34718	1.19536	-3.6367	0.00027615	0.0357248	chr3	12034350	12034546	hmox2b
peak179071	45.967	-4.94139	0.859969	-5.74601	9.13757e-09	8.13357e-06	chr3	13450114	13450446	hspbp1
peak179071	45.967	-4.94139	0.859969	-5.74601	9.13757e-09	8.13357e-06	chr3	13450114	13450446	tufm
peak179167	268.731	-1.06859	0.296173	-3.60798	0.000308593	0.0386909	chr3	13951887	13952376	nfil3-2
peak179167	268.731	-1.06859	0.296173	-3.60798	0.000308593	0.0386909	chr3	13951887	13952376	nfil3-6
peak179183	33.5875	-6.15817	1.31557	-4.681	2.85481e-06	0.00101747	chr3	14015529	14015901	epor
peak179183	33.5875	-6.15817	1.31557	-4.681	2.85481e-06	0.00101747	chr3	14015529	14015901	nfil3-6
peak179191	34.2597	-3.91984	0.895431	-4.3776	1.19994e-05	0.00314329	chr3	14105489	14105708	epor
peak179191	34.2597	-3.91984	0.895431	-4.3776	1.19994e-05	0.00314329	chr3	14105489	14105708	nfil3-6
peak179550	13.4317	-7.19896	1.85557	-3.87965	0.000104608	0.0169223	chr3	15793292	15793438	mapk8ip3
peak179550	13.4317	-7.19896	1.85557	-3.87965	0.000104608	0.0169223	chr3	15793292	15793438	nme3
peak179551	37.3419	-5.19516	0.990445	-5.24528	1.56049e-07	8.74368e-05	chr3	15793618	15794064	mapk8ip3
peak179551	37.3419	-5.19516	0.990445	-5.24528	1.56049e-07	8.74368e-05	chr3	15793618	15794064	nme3
peak179697	48.1156	-3.26223	0.684869	-4.76328	1.90469e-06	0.000736019	chr3	16397434	16397829	eps8l1
peak179697	48.1156	-3.26223	0.684869	-4.76328	1.90469e-06	0.000736019	chr3	16397434	16397829	si:dkey-29b22.6
peak179738	29.4252	-3.5158	0.914406	-3.84489	0.000120604	0.0188669	chr3	16618198	16618560	tmem86b
peak179738	29.4252	-3.5158	0.914406	-3.84489	0.000120604	0.0188669	chr3	16618198	16618560	zgc:153952
peak180092	94.6577	-1.64371	0.454913	-3.61325	0.000302382	0.0380723	chr3	18176745	18177453	spag9a
peak180092	94.6577	-1.64371	0.454913	-3.61325	0.000302382	0.0380723	chr3	18176745	18177453	tob1a
peak180174	29.1305	-3.44564	0.882404	-3.90483	9.42917e-05	0.0157359	chr3	18511446	18511691	aqp8b
peak180174	29.1305	-3.44564	0.882404	-3.90483	9.42917e-05	0.0157359	chr3	18511446	18511691	slc5a11
peak180586	73.6481	-2.04888	0.523924	-3.91064	9.20509e-05	0.0153775	chr3	20485599	20486131	sepw2a
peak180586	73.6481	-2.04888	0.523924	-3.91064	9.20509e-05	0.0153775	chr3	20485599	20486131	spop
peak180598	41.4426	-3.23661	0.729108	-4.43913	9.03213e-06	0.00255694	chr3	20530154	20530439	sepw2a
peak180598	41.4426	-3.23661	0.729108	-4.43913	9.03213e-06	0.00255694	chr3	20530154	20530439	spop
peak180642	35.8295	-3.49344	0.809969	-4.31305	1.61018e-05	0.00402012	chr3	20788443	20789040	slc35b1
peak180642	35.8295	-3.49344	0.809969	-4.31305	1.61018e-05	0.00402012	chr3	20788443	20789040	slc35b1
peak180719	55.6464	-2.57559	0.641966	-4.01203	6.01979e-05	0.0112191	chr3	21122221	21122681	syngr1a
peak180719	55.6464	-2.57559	0.641966	-4.01203	6.01979e-05	0.0112191	chr3	21122221	21122681	tcap
peak181498	55.5838	-3.54902	0.666673	-5.32349	1.01797e-07	6.23626e-05	chr3	24132709	24133027	pvalb6
peak181498	55.5838	-3.54902	0.666673	-5.32349	1.01797e-07	6.23626e-05	chr3	24132709	24133027	zgc:123244
peak181567	62.8582	-2.75169	0.592173	-4.64676	3.37189e-06	0.00116016	chr3	24497560	24498117	zgc:113411
peak181567	62.8582	-2.75169	0.592173	-4.64676	3.37189e-06	0.00116016	chr3	24497560	24498117	zgc:171506
peak182087	104.404	-5.2807	0.617259	-8.55508	1.17785e-17	5.40345e-14	chr3	26722435	26722893	clec16a
peak182087	104.404	-5.2807	0.617259	-8.55508	1.17785e-17	5.40345e-14	chr3	26722435	26722893	socs1a
peak183495	50.4848	-5.63912	0.930432	-6.06075	1.35486e-09	1.53421e-06	chr3	32755944	32756284	zgc:113090
peak183495	50.4848	-5.63912	0.930432	-6.06075	1.35486e-09	1.53421e-06	chr3	32755944	32756284	zgc:154037
peak183515	29.2799	-4.24387	0.966545	-4.39076	1.12954e-05	0.00301181	chr3	32828362	32828628	casp6l1
peak183515	29.2799	-4.24387	0.966545	-4.39076	1.12954e-05	0.00301181	chr3	32828362	32828628	zgc:113006
peak183633	56.7017	-2.19569	0.587198	-3.73927	0.000184557	0.0264371	chr3	33252506	33252752	mpp2a
peak183633	56.7017	-2.19569	0.587198	-3.73927	0.000184557	0.0264371	chr3	33252506	33252752	zgc:153739
peak183637	86.9489	-2.6062	0.488335	-5.33691	9.45439e-08	5.87338e-05	chr3	33275268	33275629	mpp2a
peak183637	86.9489	-2.6062	0.488335	-5.33691	9.45439e-08	5.87338e-05	chr3	33275268	33275629	zgc:153739
peak183665	298.984	-1.49638	0.265606	-5.63384	1.76244e-08	1.35917e-05	chr3	33370197	33370991	cacna1aa
peak183665	298.984	-1.49638	0.265606	-5.63384	1.76244e-08	1.35917e-05	chr3	33370197	33370991	sgsm3
peak183749	43.5194	-5.41836	0.961216	-5.63698	1.73057e-08	1.34036e-05	chr3	33851208	33851546	gtf2f1
peak183749	43.5194	-5.41836	0.961216	-5.63698	1.73057e-08	1.34036e-05	chr3	33851208	33851546	ighz
peak183764	74.9133	-3.12394	0.545718	-5.72447	1.03757e-08	8.75645e-06	chr3	33945830	33946398	ighv1-1
peak183764	74.9133	-3.12394	0.545718	-5.72447	1.03757e-08	8.75645e-06	chr3	33945830	33946398	ighv4-6
peak183773	66.7891	-4.08124	0.62864	-6.49217	8.46111e-11	1.31637e-07	chr3	33991088	33991412	aldh3b1
peak183883	92.7904	-7.13316	1.55256	-4.59445	4.33901e-06	0.00141273	chr3	34328784	34329130	sept9a
peak183883	92.7904	-7.13316	1.55256	-4.59445	4.33901e-06	0.00141273	chr3	34328784	34329130	si:dkey-54k13.1
peak183983	56.5954	-2.93653	0.665491	-4.41257	1.0215e-05	0.00282039	chr3	34797200	34797831	itga3a
peak183983	56.5954	-2.93653	0.665491	-4.41257	1.0215e-05	0.00282039	chr3	34797200	34797831	prkcbb
peak184244	36.7928	-7.2098	1.58919	-4.53676	5.71248e-06	0.00176825	chr3	35885778	35886031	psmg3
peak184244	36.7928	-7.2098	1.58919	-4.53676	5.71248e-06	0.00176825	chr3	35885778	35886031	rab11fip4a
peak185560	134.226	-5.72567	0.597655	-9.58022	9.68383e-22	9.62546e-18	chr3	42258654	42259214	mafk
peak185560	134.226	-5.72567	0.597655	-9.58022	9.68383e-22	9.62546e-18	chr3	42258654	42259214	tmem184a
peak185569	30.8225	-5.98947	1.29914	-4.61035	4.01993e-06	0.00131813	chr3	42281545	42282072	mafk
peak185569	30.8225	-5.98947	1.29914	-4.61035	4.01993e-06	0.00131813	chr3	42281545	42282072	micall2a
peak186232	55.0628	-2.66101	0.61724	-4.31115	1.62406e-05	0.00404129	chr3	46128999	46129394	psmg3
peak186232	55.0628	-2.66101	0.61724	-4.31115	1.62406e-05	0.00404129	chr3	46128999	46129394	rab11fip4a
peak186629	27.6198	-5.08417	1.14557	-4.43811	9.07542e-06	0.00256109	chr3	48727381	48727613	prkcsh
peak186629	27.6198	-5.08417	1.14557	-4.43811	9.07542e-06	0.00256109	chr3	48727381	48727613	raver1
peak187131	55.6107	-3.12211	0.626174	-4.98601	6.16405e-07	0.000283012	chr3	51878886	51879309	ptger1c
peak187131	55.6107	-3.12211	0.626174	-4.98601	6.16405e-07	0.000283012	chr3	51878886	51879309	zgc:165582
peak187161	19.6142	-4.17626	1.16796	-3.5757	0.000349299	0.0425714	chr3	52365353	52365699	slc27a1a
peak187161	19.6142	-4.17626	1.16796	-3.5757	0.000349299	0.0425714	chr3	52365353	52365699	zgc:113210
peak187306	27.3648	-4.71703	1.06479	-4.43002	9.42247e-06	0.00264019	chr3	53071594	53071831	nr5a5
peak187306	27.3648	-4.71703	1.06479	-4.43002	9.42247e-06	0.00264019	chr3	53071594	53071831	xab2
peak187553	57.3893	-3.78062	0.675488	-5.59687	2.1825e-08	1.61357e-05	chr3	54289425	54289972	eif3g
peak187553	57.3893	-3.78062	0.675488	-5.59687	2.1825e-08	1.61357e-05	chr3	54289425	54289972	zgc:101777
peak187717	55.2472	-2.29933	0.608042	-3.78153	0.000155866	0.0231042	chr3	54858565	54858830	ba1
peak187717	55.2472	-2.29933	0.608042	-3.78153	0.000155866	0.0231042	chr3	54858565	54858830	hbae1
peak187726	67.4914	-2.11844	0.564591	-3.75216	0.000175315	0.0253569	chr3	54899740	54900048	hbae3
peak187726	67.4914	-2.11844	0.564591	-3.75216	0.000175315	0.0253569	chr3	54899740	54900048	mafg1
peak188289	64.4281	-4.55307	0.705263	-6.45585	1.07615e-10	1.65982e-07	chr3	57893113	57893481	notum1a
peak188289	64.4281	-4.55307	0.705263	-6.45585	1.07615e-10	1.65982e-07	chr3	57893113	57893481	pycr1
peak188381	84.8594	-1.9337	0.480514	-4.02423	5.71627e-05	0.0108225	chr3	58433089	58433363	zgc:101633
peak188381	84.8594	-1.9337	0.480514	-4.02423	5.71627e-05	0.0108225	chr3	58433089	58433363	zgc:171489
peak189536	32.701	-4.6654	0.967717	-4.82104	1.42815e-06	0.000578093	chr4	1564967	1565200	aebp2
peak189536	32.701	-4.6654	0.967717	-4.82104	1.42815e-06	0.000578093	chr4	1564967	1565200	pik3cg
peak189721	105.214	-1.55837	0.427358	-3.64653	0.000265808	0.034957	chr4	2226416	2226850	frs2a
peak189721	105.214	-1.55837	0.427358	-3.64653	0.000265808	0.034957	chr4	2226416	2226850	yeats4
peak189756	44.4699	-2.68981	0.67787	-3.96802	7.24712e-05	0.0129274	chr4	2401145	2401375	cmah
peak189756	44.4699	-2.68981	0.67787	-3.96802	7.24712e-05	0.0129274	chr4	2401145	2401375	krr1
peak189808	149.941	-1.5444	0.361755	-4.26919	1.9618e-05	0.0046862	chr4	2595699	2596069	csrp2
peak189844	53.2461	-4.3513	0.737221	-5.90231	3.5845e-09	3.58244e-06	chr4	2742423	2742925	bcap29
peak189844	53.2461	-4.3513	0.737221	-5.90231	3.5845e-09	3.58244e-06	chr4	2742423	2742925	slco1c1
peak190114	43.3895	-2.40371	0.675846	-3.5566	0.000375692	0.0448113	chr4	3746890	3747315	si:dkey-61f9.2
peak190114	43.3895	-2.40371	0.675846	-3.5566	0.000375692	0.0448113	chr4	3746890	3747315	znf800b
peak190196	56.9235	-2.19058	0.615712	-3.5578	0.000373971	0.0447253	chr4	4151572	4151967	asb15b
peak190196	56.9235	-2.19058	0.615712	-3.5578	0.000373971	0.0447253	chr4	4151572	4151967	cd9b
peak191499	37.8748	-3.54923	0.866033	-4.09826	4.16266e-05	0.00860998	chr4	8902600	8902866	fbxl14b
peak191499	37.8748	-3.54923	0.866033	-4.09826	4.16266e-05	0.00860998	chr4	8902600	8902866	samm50l
peak193176	185.944	-1.76453	0.338951	-5.20584	1.93118e-07	0.000102832	chr4	15126689	15127143	nrf1
peak193176	185.944	-1.76453	0.338951	-5.20584	1.93118e-07	0.000102832	chr4	15126689	15127143	plxna4
peak195478	42.0341	-3.16523	0.720433	-4.39351	1.11537e-05	0.00297846	chr4	24593594	24593957	celf2
peak195478	42.0341	-3.16523	0.720433	-4.39351	1.11537e-05	0.00297846	chr4	24593594	24593957	gata3
peak195629	50.9615	-5.64926	0.933777	-6.04991	1.4493e-09	1.62875e-06	chr4	25180806	25181112	taf3
peak195757	26.6081	-5.78437	1.34565	-4.29858	1.71894e-05	0.00419569	chr4	25953423	25953678	metap2a
peak195757	26.6081	-5.78437	1.34565	-4.29858	1.71894e-05	0.00419569	chr4	25953423	25953678	vetz
peak196285	96.6657	-1.75262	0.450298	-3.89214	9.93631e-05	0.0163941	chr4	31213494	31213738	NA
peak196390	13.7402	-7.23035	1.84728	-3.91406	9.07573e-05	0.0152325	chr4	35300556	35300759	mertk
peak196390	13.7402	-7.23035	1.84728	-3.91406	9.07573e-05	0.0152325	chr4	35300556	35300759	si:ch211-127b6.2
peak196393	40.3746	-4.48205	0.914173	-4.90285	9.44551e-07	0.000407215	chr4	35766683	35766944	si:dkey-176f19.5
peak196393	40.3746	-4.48205	0.914173	-4.90285	9.44551e-07	0.000407215	chr4	35766683	35766944	si:dkey-176f19.6
peak196464	36.6592	-3.37609	0.826804	-4.0833	4.44e-05	0.00898623	chr4	39285604	39285940	si:dkey-54i3.4
peak196464	36.6592	-3.37609	0.826804	-4.0833	4.44e-05	0.00898623	chr4	39285604	39285940	zgc:174642
peak196485	19.1097	-4.63589	1.25553	-3.69239	0.000222155	0.0305746	chr4	39946071	39946296	si:dkey-157e10.8
peak196485	19.1097	-4.63589	1.25553	-3.69239	0.000222155	0.0305746	chr4	39946071	39946296	si:dkey-22h13.3
peak196518	17.9292	-5.24755	1.43329	-3.66119	0.000251042	0.033594	chr4	41238381	41238606	si:dkey-238g7.2
peak196518	17.9292	-5.24755	1.43329	-3.66119	0.000251042	0.033594	chr4	41238381	41238606	zgc:174696
peak196854	49.2225	-2.54365	0.668107	-3.80725	0.000140523	0.0212525	chr4	49296917	49297613	si:ch211-207e19.13
peak196854	49.2225	-2.54365	0.668107	-3.80725	0.000140523	0.0212525	chr4	49296917	49297613	si:dkey-82i20.3
peak196886	19.0256	-5.43981	1.45045	-3.75043	0.000176534	0.0255125	chr4	49969986	49970264	si:dkey-16b10.1
peak196886	19.0256	-5.43981	1.45045	-3.75043	0.000176534	0.0255125	chr4	49969986	49970264	si:dkey-77p23.2
peak196916	22.9766	-5.67059	1.38333	-4.09924	4.14511e-05	0.00858359	chr4	51141935	51142206	si:dkey-8o9.2
peak196916	22.9766	-5.67059	1.38333	-4.09924	4.14511e-05	0.00858359	chr4	51141935	51142206	zgc:173702
peak197197	71.4352	-3.9558	0.645663	-6.12672	8.97081e-10	1.07001e-06	chr4	63005101	63005367	si:ch211-223a21.6
peak197197	71.4352	-3.9558	0.645663	-6.12672	8.97081e-10	1.07001e-06	chr4	63005101	63005367	si:dkey-78k22.1
peak197233	42.8342	-4.78212	0.912635	-5.2399	1.60662e-07	8.80683e-05	chr4	64334824	64335223	NA
peak197307	64.3964	-2.28675	0.578501	-3.9529	7.72111e-05	0.0135168	chr4	67051773	67052084	zgc:173702
peak197542	56.7515	-3.14859	0.625004	-5.03771	4.71132e-07	0.000225381	chr4	72363016	72363395	si:dkey-262g12.3
peak197542	56.7515	-3.14859	0.625004	-5.03771	4.71132e-07	0.000225381	chr4	72363016	72363395	zgc:165515
peak197655	78.2768	-2.74788	0.521131	-5.27292	1.34271e-07	7.79971e-05	chr4	73311212	73312000	nup50
peak197655	78.2768	-2.74788	0.521131	-5.27292	1.34271e-07	7.79971e-05	chr4	73311212	73312000	ptprb
peak197700	30.6425	-4.34077	0.954542	-4.54749	5.429e-06	0.00170471	chr4	73524315	73524566	nup50
peak197700	30.6425	-4.34077	0.954542	-4.54749	5.429e-06	0.00170471	chr4	73524315	73524566	zgc:172139
peak197717	44.6995	-2.74038	0.68111	-4.0234	5.73628e-05	0.0108486	chr4	73621464	73621802	large
peak197717	44.6995	-2.74038	0.68111	-4.0234	5.73628e-05	0.0108486	chr4	73621464	73621802	ms4a17a.17
peak197870	49.8106	-2.3606	0.645901	-3.65473	0.00025745	0.0341957	chr4	75583164	75583467	zgc:173770
peak197870	49.8106	-2.3606	0.645901	-3.65473	0.00025745	0.0341957	chr4	75583164	75583467	zgc:92791
peak197883	27.4813	-3.29331	0.905854	-3.63559	0.000277345	0.0358275	chr4	75661569	75661827	zgc:174310
peak197883	27.4813	-3.29331	0.905854	-3.63559	0.000277345	0.0358275	chr4	75661569	75661827	zgc:92791
peak197900	28.6367	-3.0894	0.86362	-3.57727	0.000347206	0.042461	chr4	75732787	75733036	zgc:113098
peak197921	83.5556	-2.51176	0.514787	-4.87922	1.06504e-06	0.000452811	chr4	76064786	76065237	NA
peak197922	41.8231	-2.86442	0.721428	-3.97049	7.17244e-05	0.0128522	chr4	76065248	76065594	NA
peak197942	16.634	-7.50819	1.78337	-4.2101	2.55255e-05	0.00580293	chr4	76192360	76192598	gbp4
peak197942	16.634	-7.50819	1.78337	-4.2101	2.55255e-05	0.00580293	chr4	76192360	76192598	zgc:110171
peak198740	16.7346	-5.30961	1.49209	-3.55851	0.00037296	0.0446641	chr5	3840014	3840236	dhrs11a
peak198740	16.7346	-5.30961	1.49209	-3.55851	0.00037296	0.0446641	chr5	3840014	3840236	si:ch211-283g2.1
peak19875	121.745	-1.44615	0.398477	-3.62919	0.000284312	0.0365166	chr10	44085075	44085856	sept5b
peak19875	121.745	-1.44615	0.398477	-3.62919	0.000284312	0.0365166	chr10	44085075	44085856	tlr8b
peak199770	75.2491	-1.92373	0.515902	-3.72886	0.000192347	0.0273343	chr5	10445429	10446020	rtn4r
peak199770	75.2491	-1.92373	0.515902	-3.72886	0.000192347	0.0273343	chr5	10445429	10446020	zgc:112294
peak200035	31.9374	-3.53539	0.862184	-4.10051	4.12245e-05	0.00854655	chr5	12324927	12325179	p2rx2
peak200036	43.2946	-4.84637	0.867811	-5.58459	2.34252e-08	1.72474e-05	chr5	12327118	12327502	p2rx2
peak200150	30.3735	-4.25843	0.968462	-4.3971	1.09704e-05	0.00294711	chr5	12804570	12804797	sdf2l1
peak200150	30.3735	-4.25843	0.968462	-4.3971	1.09704e-05	0.00294711	chr5	12804570	12804797	top3b
peak201475	16.5271	-5.30107	1.5006	-3.53262	0.000411459	0.0474637	chr5	18703748	18703965	atp8b5a
peak201475	16.5271	-5.30107	1.5006	-3.53262	0.000411459	0.0474637	chr5	18703748	18703965	unc13ba
peak20300	61.772	-2.83203	0.609209	-4.6487	3.34036e-06	0.00115375	chr11	189882	190199	cdk4
peak20300	61.772	-2.83203	0.609209	-4.6487	3.34036e-06	0.00115375	chr11	189882	190199	tegt
peak207052	42.9578	-4.23521	0.879595	-4.81496	1.47232e-06	0.000590628	chr5	44226562	44226912	ctsla
peak207052	42.9578	-4.23521	0.879595	-4.81496	1.47232e-06	0.000590628	chr5	44226562	44226912	fbp2
peak20871	43.556	-2.61221	0.692118	-3.77423	0.000160501	0.0236541	chr11	2614247	2614548	b3galt6
peak209448	45.9207	-3.96364	0.775991	-5.10784	3.25862e-07	0.000161054	chr5	56971102	56971697	cryabb
peak210083	55.128	-5.20843	0.820636	-6.34682	2.19805e-10	3.14611e-07	chr5	61176077	61176385	im:7138535
peak210083	55.128	-5.20843	0.820636	-6.34682	2.19805e-10	3.14611e-07	chr5	61176077	61176385	si:dkeyp-117b8.3
peak210086	22.032	-7.91352	1.70631	-4.6378	3.52129e-06	0.00119774	chr5	61198830	61199061	im:7138535
peak210086	22.032	-7.91352	1.70631	-4.6378	3.52129e-06	0.00119774	chr5	61198830	61199061	si:dkeyp-117b8.3
peak210088	39.5067	-5.27532	0.977079	-5.39907	6.69878e-08	4.35823e-05	chr5	61228766	61229197	im:7138535
peak210088	39.5067	-5.27532	0.977079	-5.39907	6.69878e-08	4.35823e-05	chr5	61228766	61229197	si:dkeyp-117b8.3
peak210108	307.592	-0.923275	0.259619	-3.55627	0.000376164	0.0448376	chr5	61335535	61336120	sepw1
peak210301	16.3761	-7.4854	1.78823	-4.18592	2.84016e-05	0.00631238	chr5	62196720	62196948	adora2b
peak210301	16.3761	-7.4854	1.78823	-4.18592	2.84016e-05	0.00631238	chr5	62196720	62196948	specc1
peak211392	34.4577	-3.69577	1.0014	-3.69062	0.000223707	0.0306936	chr5	67599906	67600156	mepce
peak211392	34.4577	-3.69577	1.0014	-3.69062	0.000223707	0.0306936	chr5	67599906	67600156	tnfsf13
peak21142	71.7167	-2.25349	0.529113	-4.259	2.05341e-05	0.00487358	chr11	3860386	3860870	gata2a
peak21142	71.7167	-2.25349	0.529113	-4.259	2.05341e-05	0.00487358	chr11	3860386	3860870	rpn1
peak211465	30.7159	-5.93489	1.29828	-4.57136	4.84568e-06	0.00155092	chr5	67911759	67912077	mepce
peak211465	30.7159	-5.93489	1.29828	-4.57136	4.84568e-06	0.00155092	chr5	67911759	67912077	tnfsf13
peak211513	87.7367	-3.54942	0.521265	-6.80924	9.81173e-12	1.82861e-08	chr5	68166362	68166693	ank1
peak211513	87.7367	-3.54942	0.521265	-6.80924	9.81173e-12	1.82861e-08	chr5	68166362	68166693	si:ch211-173b16.3
peak211550	93.0736	-1.77062	0.48353	-3.66187	0.000250385	0.0335563	chr5	68412080	68412471	zgc:171967
peak211568	43.683	-3.21536	0.716178	-4.48961	7.13541e-06	0.00212065	chr5	68513751	68514010	inpp5jb
peak211568	43.683	-3.21536	0.716178	-4.48961	7.13541e-06	0.00212065	chr5	68513751	68514010	isca1
peak212338	17.15	-7.55176	1.77407	-4.25674	2.07429e-05	0.00490254	chr6	325292	325528	rbfox2
peak212352	83.0519	-2.90599	0.509154	-5.70749	1.14655e-08	9.36693e-06	chr6	382276	382684	cyth4b
peak212352	83.0519	-2.90599	0.509154	-5.70749	1.14655e-08	9.36693e-06	chr6	382276	382684	fam83fb
peak214728	16.087	-6.05976	1.70559	-3.55288	0.000381044	0.0451233	chr6	11297644	11297858	calcrlb
peak214728	16.087	-6.05976	1.70559	-3.55288	0.000381044	0.0451233	chr6	11297644	11297858	col5a2b
peak214762	99.9029	-1.86201	0.444191	-4.19192	2.76598e-05	0.00620145	chr6	11525177	11525528	zgc:165651
peak214930	61.3216	-1.97871	0.561315	-3.52513	0.000423277	0.0486388	chr6	12260326	12261115	slc15a1b
peak214930	61.3216	-1.97871	0.561315	-3.52513	0.000423277	0.0486388	chr6	12260326	12261115	stk24b
peak21510	223.11	-1.14983	0.307017	-3.74516	0.000180279	0.0259725	chr11	5819023	5819409	ndufs7
peak21510	223.11	-1.14983	0.307017	-3.74516	0.000180279	0.0259725	chr11	5819023	5819409	r3hdm4
peak219018	19.7799	-5.54795	1.45425	-3.815	0.000136183	0.0208071	chr6	34829284	34829529	lrp8
peak219018	19.7799	-5.54795	1.45425	-3.815	0.000136183	0.0208071	chr6	34829284	34829529	mier1a
peak219048	40.3619	-3.18895	0.767085	-4.15723	3.22126e-05	0.0069354	chr6	34961686	34961990	hsd17b7
peak219048	40.3619	-3.18895	0.767085	-4.15723	3.22126e-05	0.0069354	chr6	34961686	34961990	serbp1a
peak219127	127.658	-8.96369	1.37163	-6.53506	6.35827e-11	1.01571e-07	chr6	35343778	35344377	rgs4
peak219127	127.658	-8.96369	1.37163	-6.53506	6.35827e-11	1.01571e-07	chr6	35343778	35344377	uhmk1
peak219164	50.7307	-2.6663	0.635575	-4.1951	2.72751e-05	0.00613826	chr6	35531510	35532101	fam5ca
peak219164	50.7307	-2.6663	0.635575	-4.1951	2.72751e-05	0.00613826	chr6	35531510	35532101	rgs8
peak219779	48.8125	-3.74801	0.747738	-5.01247	5.37358e-07	0.00025234	chr6	38922191	38922414	slc48a1b
peak219779	48.8125	-3.74801	0.747738	-5.01247	5.37358e-07	0.00025234	chr6	38922191	38922414	vdrb
peak220233	38.0002	-3.79966	0.962734	-3.94674	7.92215e-05	0.0138417	chr6	40876448	40876791	zgc:112163
peak221253	82.8437	-2.05204	0.48667	-4.2165	2.48122e-05	0.00568409	chr6	45502125	45502995	cntn4
peak221255	13.5074	-7.20408	1.85351	-3.88673	0.000101604	0.0165109	chr6	45532136	45532402	cntn4
peak221297	17.8929	-6.19669	1.69785	-3.64974	0.000262505	0.0346614	chr6	45787841	45788075	cntn4
peak221297	17.8929	-6.19669	1.69785	-3.64974	0.000262505	0.0346614	chr6	45787841	45788075	rbm19
peak221342	77.7357	-2.14061	0.503433	-4.25202	2.11851e-05	0.00498728	chr6	45946671	45946989	tardbp
peak221484	54.2139	-2.84692	0.635909	-4.47694	7.57208e-06	0.00223558	chr6	46969346	46970043	grm4
peak221484	54.2139	-2.84692	0.635909	-4.47694	7.57208e-06	0.00223558	chr6	46969346	46970043	zgc:113358
peak221696	71.2851	-2.48338	0.564462	-4.39956	1.0847e-05	0.00292726	chr6	48119963	48120340	phc2b
peak221696	71.2851	-2.48338	0.564462	-4.39956	1.0847e-05	0.00292726	chr6	48119963	48120340	slc2a1b
peak221886	35.653	-4.09292	0.892409	-4.58637	4.51009e-06	0.00145654	chr6	48980308	48980565	si:ch211-105j21.7
peak221887	146.348	-3.35127	0.419211	-7.99423	1.30385e-15	4.76079e-12	chr6	48980889	48981317	si:ch211-105j21.7
peak221887	146.348	-3.35127	0.419211	-7.99423	1.30385e-15	4.76079e-12	chr6	48980889	48981317	sycp1
peak222055	63.8042	-3.08889	0.589303	-5.24159	1.59195e-07	8.80683e-05	chr6	49720054	49720334	stx16
peak222065	43.4992	-4.38097	0.805647	-5.43783	5.39322e-08	3.57381e-05	chr6	49792181	49792475	ctsz
peak222065	43.4992	-4.38097	0.805647	-5.43783	5.39322e-08	3.57381e-05	chr6	49792181	49792475	nelfcd
peak222093	150.123	-2.24581	0.381767	-5.88268	4.03665e-09	3.93681e-06	chr6	49900008	49900379	atp5e
peak222093	150.123	-2.24581	0.381767	-5.88268	4.03665e-09	3.93681e-06	chr6	49900008	49900379	zgc:56112
peak222249	20.3351	-5.35903	1.41144	-3.79685	0.000146547	0.0219593	chr6	50575782	50576048	mych
peak222249	20.3351	-5.35903	1.41144	-3.79685	0.000146547	0.0219593	chr6	50575782	50576048	si:dkey-46l15.1
peak222290	152.452	-1.8656	0.364851	-5.11332	3.16538e-07	0.000157753	chr6	50692624	50693166	osgn1
peak222290	152.452	-1.8656	0.364851	-5.11332	3.16538e-07	0.000157753	chr6	50692624	50693166	si:dkey-46l15.1
peak222489	18.8771	-5.39415	1.45714	-3.70188	0.000214007	0.0297044	chr6	51526495	51526760	ptprt
peak222489	18.8771	-5.39415	1.45714	-3.70188	0.000214007	0.0297044	chr6	51526495	51526760	rbl1
peak222495	59.7466	-3.3593	0.636443	-5.27823	1.30435e-07	7.60157e-05	chr6	51542191	51542411	ptprt
peak222495	59.7466	-3.3593	0.636443	-5.27823	1.30435e-07	7.60157e-05	chr6	51542191	51542411	rbl1
peak222496	28.4167	-5.83357	1.31528	-4.43522	9.19778e-06	0.00258745	chr6	51542506	51542733	ptprt
peak222496	28.4167	-5.83357	1.31528	-4.43522	9.19778e-06	0.00258745	chr6	51542506	51542733	rbl1
peak223878	42.6894	-5.39356	0.962989	-5.60085	2.133e-08	1.58351e-05	chr6	58613883	58614232	arfrp1
peak223878	42.6894	-5.39356	0.962989	-5.60085	2.133e-08	1.58351e-05	chr6	58613883	58614232	sp7
peak224417	126.98	-3.60163	0.449757	-8.00796	1.16628e-15	4.43967e-12	chr7	621725	622624	drap1
peak224417	126.98	-3.60163	0.449757	-8.00796	1.16628e-15	4.43967e-12	chr7	621725	622624	rela
peak224557	77.0316	-6.20392	0.899627	-6.8961	5.34484e-12	1.06253e-08	chr7	1442458	1442806	supt16h
peak224557	77.0316	-6.20392	0.899627	-6.8961	5.34484e-12	1.06253e-08	chr7	1442458	1442806	zgc:171424
peak224694	45.1475	-2.4707	0.670688	-3.68382	0.000229762	0.0313561	chr7	3999233	3999589	slc12a10.2
peak224694	45.1475	-2.4707	0.670688	-3.68382	0.000229762	0.0313561	chr7	3999233	3999589	zgc:55733
peak224737	43.7525	-6.49151	1.21734	-5.33255	9.68451e-08	5.97484e-05	chr7	4756836	4757192	si:dkey-28d5.10
peak224932	162.88	-1.39572	0.347942	-4.01135	6.0373e-05	0.0112336	chr7	6330777	6331039	wu:fe11b02
peak224932	162.88	-1.39572	0.347942	-4.01135	6.0373e-05	0.0112336	chr7	6330777	6331039	zgc:114037
peak224943	39.1994	-3.06411	0.749095	-4.09041	4.30606e-05	0.00879578	chr7	6382560	6382836	pnp5a
peak224943	39.1994	-3.06411	0.749095	-4.09041	4.30606e-05	0.00879578	chr7	6382560	6382836	zgc:110425
peak225001	69.6714	-3.17569	0.603256	-5.26425	1.40761e-07	8.12395e-05	chr7	6675166	6675633	klc2
peak225001	69.6714	-3.17569	0.603256	-5.26425	1.40761e-07	8.12395e-05	chr7	6675166	6675633	sf3b2
peak225013	38.3238	-2.58974	0.728121	-3.55674	0.000375479	0.0448113	chr7	6729893	6730233	zgc:175248
peak225017	26.8625	-4.10173	0.994255	-4.12543	3.70038e-05	0.00778886	chr7	6742814	6743202	ccs
peak225017	26.8625	-4.10173	0.994255	-4.12543	3.70038e-05	0.00778886	chr7	6742814	6743202	zgc:175248
peak22528	68.8319	-1.9703	0.532562	-3.69967	0.000215884	0.0298723	chr11	11477022	11477513	zgc:136902
peak225702	19.5279	-7.73812	1.73716	-4.45448	8.40982e-06	0.0024256	chr7	10916189	10916432	abhd17c
peak225702	19.5279	-7.73812	1.73716	-4.45448	8.40982e-06	0.0024256	chr7	10916189	10916432	mesdc2
peak225816	93.2648	-6.47835	1.33041	-4.86944	1.11914e-06	0.000472243	chr7	11614238	11614857	mesdc2
peak225816	93.2648	-6.47835	1.33041	-4.86944	1.11914e-06	0.000472243	chr7	11614238	11614857	mex3b
peak226052	69.758	-7.41102	1.89192	-3.91719	8.95855e-05	0.0151067	chr7	12704381	12704699	rplp2l
peak226052	69.758	-7.41102	1.89192	-3.91719	8.95855e-05	0.0151067	chr7	12704381	12704699	saa
peak226080	53.6421	-4.96791	0.866191	-5.73535	9.73096e-09	8.54306e-06	chr7	12794467	12794738	sdhaf2
peak226080	53.6421	-4.96791	0.866191	-5.73535	9.73096e-09	8.54306e-06	chr7	12794467	12794738	syt7b
peak227154	167.205	-1.24577	0.344643	-3.61468	0.00030072	0.0379165	chr7	18414995	18415489	coro1b
peak227154	167.205	-1.24577	0.344643	-3.61468	0.00030072	0.0379165	chr7	18414995	18415489	mllt3
peak227931	42.0256	-3.29555	0.729855	-4.51534	6.32145e-06	0.00191695	chr7	21564633	21564882	tm4sf5
peak227931	42.0256	-3.29555	0.729855	-4.51534	6.32145e-06	0.00191695	chr7	21564633	21564882	tmem88b
peak229205	81.8529	-1.9811	0.489363	-4.04833	5.15836e-05	0.009999	chr7	26871173	26871633	rps13
peak229205	81.8529	-1.9811	0.489363	-4.04833	5.15836e-05	0.009999	chr7	26871173	26871633	sox6
peak229209	29.6665	-4.02496	0.95536	-4.21303	2.51969e-05	0.00574877	chr7	26882667	26882975	rps13
peak229209	29.6665	-4.02496	0.95536	-4.21303	2.51969e-05	0.00574877	chr7	26882667	26882975	sox6
peak231159	168.686	-1.57897	0.357774	-4.4133	1.01806e-05	0.00281525	chr7	34181394	34181740	calml4a
peak231159	168.686	-1.57897	0.357774	-4.4133	1.01806e-05	0.00281525	chr7	34181394	34181740	irx3a
peak231283	178.753	-2.18056	0.347698	-6.27142	3.57766e-10	4.84922e-07	chr7	34556272	34557051	ddx28
peak231283	178.753	-2.18056	0.347698	-6.27142	3.57766e-10	4.84922e-07	chr7	34556272	34557051	esrp2
peak231325	24.2276	-8.05061	1.68422	-4.78003	1.75273e-06	0.000687696	chr7	34687125	34687397	ddx28
peak231325	24.2276	-8.05061	1.68422	-4.78003	1.75273e-06	0.000687696	chr7	34687125	34687397	esrp2
peak231429	32.2335	-3.13578	0.849729	-3.69033	0.000223965	0.0307055	chr7	35137087	35137329	lpcat2
peak231539	32.8517	-4.07011	0.897599	-4.53444	5.77574e-06	0.00178167	chr7	35465029	35465320	aktip
peak231539	32.8517	-4.07011	0.897599	-4.53444	5.77574e-06	0.00178167	chr7	35465029	35465320	irx5a
peak232016	45.8879	-2.64325	0.708265	-3.73201	0.000189957	0.0270376	chr7	37154635	37155016	cylda
peak232016	45.8879	-2.64325	0.708265	-3.73201	0.000189957	0.0270376	chr7	37154635	37155016	sall1a
peak23260	72.6688	-3.90573	0.598119	-6.53003	6.5757e-11	1.04114e-07	chr11	15992709	15993197	rpf1
peak23260	72.6688	-3.90573	0.598119	-6.53003	6.5757e-11	1.04114e-07	chr11	15992709	15993197	tada3l
peak232980	17.7104	-5.38154	1.48759	-3.61762	0.00029732	0.0376343	chr7	40910245	40910511	scrib
peak232980	17.7104	-5.38154	1.48759	-3.61762	0.00029732	0.0376343	chr7	40910245	40910511	zgc:165532
peak233574	38.792	-7.3073	1.52959	-4.77731	1.77656e-06	0.000695522	chr7	43518018	43518504	cdh11
peak233574	38.792	-7.3073	1.52959	-4.77731	1.77656e-06	0.000695522	chr7	43518018	43518504	cdh5
peak233718	26.0218	-5.80082	1.34254	-4.32079	1.55471e-05	0.00390677	chr7	44236947	44237206	cdh5
peak233718	26.0218	-5.80082	1.34254	-4.32079	1.55471e-05	0.00390677	chr7	44236947	44237206	tk2
peak233792	183.303	-1.77047	0.337539	-5.24523	1.5609e-07	8.74368e-05	chr7	44555943	44556790	ca7
peak233792	183.303	-1.77047	0.337539	-5.24523	1.5609e-07	8.74368e-05	chr7	44555943	44556790	rrad
peak233948	163.347	-1.36963	0.35191	-3.892	9.94193e-05	0.0163941	chr7	45691184	45691595	pop4
peak23596	42.1235	-3.59476	0.831405	-4.32372	1.5342e-05	0.00387701	chr11	17778069	17778396	socs8
peak23596	42.1235	-3.59476	0.831405	-4.32372	1.5342e-05	0.00387701	chr11	17778069	17778396	uba3
peak23744	49.3088	-2.62281	0.661801	-3.96314	7.39698e-05	0.0131033	chr11	18529273	18529602	id1
peak23744	49.3088	-2.62281	0.661801	-3.96314	7.39698e-05	0.0131033	chr11	18529273	18529602	ncoa3
peak238917	35.2597	-2.98699	0.790446	-3.77887	0.000157543	0.0232736	chr7	70850729	70851160	dhx15
peak238917	35.2597	-2.98699	0.790446	-3.77887	0.000157543	0.0232736	chr7	70850729	70851160	ppargc1a
peak239009	94.8343	-2.42207	0.470522	-5.14762	2.63813e-07	0.000134857	chr7	71340824	71341276	adcyap1a
peak239009	94.8343	-2.42207	0.470522	-5.14762	2.63813e-07	0.000134857	chr7	71340824	71341276	smchd1
peak240188	19.8137	-5.39852	1.42868	-3.77868	0.000157659	0.0232736	chr8	2687557	2687817	naif1
peak240188	19.8137	-5.39852	1.42868	-3.77868	0.000157659	0.0232736	chr8	2687557	2687817	sh3glb2a
peak240219	21.4426	-4.83988	1.22382	-3.95473	7.66208e-05	0.013453	chr8	2810177	2810440	crb2b
peak240219	21.4426	-4.83988	1.22382	-3.95473	7.66208e-05	0.013453	chr8	2810177	2810440	lhx2b
peak240706	20.9828	-4.79748	1.24034	-3.86788	0.000109785	0.0176044	chr8	5121569	5121854	bnip3la
peak240706	20.9828	-4.79748	1.24034	-3.86788	0.000109785	0.0176044	chr8	5121569	5121854	diabloa
peak240707	45.5188	-5.44996	0.962625	-5.66156	1.50004e-08	1.17197e-05	chr8	5131820	5132336	bnip3la
peak240707	45.5188	-5.44996	0.962625	-5.66156	1.50004e-08	1.17197e-05	chr8	5131820	5132336	diabloa
peak240779	103.074	-2.61335	0.456328	-5.72691	1.02278e-08	8.75645e-06	chr8	5546374	5547011	lrrtm4l2
peak240779	103.074	-2.61335	0.456328	-5.72691	1.02278e-08	8.75645e-06	chr8	5546374	5547011	or129-1
peak241085	17.0461	-5.75881	1.58285	-3.63825	0.000274497	0.0355624	chr8	7487112	7487493	cdk20
peak241888	67.3181	-2.28873	0.574402	-3.98455	6.76075e-05	0.0122305	chr8	11066872	11067231	ampd1
peak241888	67.3181	-2.28873	0.574402	-3.98455	6.76075e-05	0.0122305	chr8	11066872	11067231	bcas2
peak243394	129.93	-2.64317	0.410884	-6.43288	1.25206e-10	1.85134e-07	chr8	17956210	17956910	fpgt
peak244591	72.7433	-2.5676	0.542659	-4.73152	2.22843e-06	0.000834101	chr8	23111751	23112323	gid8a
peak244591	72.7433	-2.5676	0.542659	-4.73152	2.22843e-06	0.000834101	chr8	23111751	23112323	ythdf1
peak245089	65.1318	-2.90328	0.574262	-5.05567	4.28874e-07	0.000208511	chr8	25615067	25615425	sema3ga
peak245089	65.1318	-2.90328	0.574262	-5.05567	4.28874e-07	0.000208511	chr8	25615067	25615425	wasa
peak245976	50.4595	-2.67581	0.731391	-3.65852	0.000253678	0.0338374	chr8	29574175	29574576	atoh1a
peak245976	50.4595	-2.67581	0.731391	-3.65852	0.000253678	0.0338374	chr8	29574175	29574576	grid2
peak24623	34.8807	-2.85936	0.808677	-3.53585	0.000406468	0.0471151	chr11	22264135	22264437	myog
peak24623	34.8807	-2.85936	0.808677	-3.53585	0.000406468	0.0471151	chr11	22264135	22264437	ppfia4
peak246265	54.0638	-2.29421	0.608175	-3.77228	0.000161763	0.0237838	chr8	30733542	30733836	gucd1
peak246265	54.0638	-2.29421	0.608175	-3.77228	0.000161763	0.0237838	chr8	30733542	30733836	snrpd3
peak246533	104.836	-1.56998	0.429145	-3.65839	0.000253806	0.0338374	chr8	32471815	32472172	mthfd2l
peak246533	104.836	-1.56998	0.429145	-3.65839	0.000253806	0.0338374	chr8	32471815	32472172	ncs1a
peak246766	57.681	-2.39102	0.588134	-4.06543	4.7943e-05	0.00953081	chr8	33613528	33613880	gapvd1
peak246766	57.681	-2.39102	0.588134	-4.06543	4.7943e-05	0.00953081	chr8	33613528	33613880	lmx1bb
peak247259	119.132	-1.51025	0.414193	-3.64623	0.000266112	0.034957	chr8	37193902	37194326	csf1b
peak247259	119.132	-1.51025	0.414193	-3.64623	0.000266112	0.034957	chr8	37193902	37194326	rbm39b
peak247484	270.91	-5.98145	0.953655	-6.27213	3.56142e-10	4.84922e-07	chr8	39361320	39361880	msi1
peak247484	270.91	-5.98145	0.953655	-6.27213	3.56142e-10	4.84922e-07	chr8	39361320	39361880	si:dkey-26m3.1
peak247980	97.7647	-2.30961	0.457329	-5.05021	4.41325e-07	0.000213404	chr8	42650727	42651079	kazald3
peak247980	97.7647	-2.30961	0.457329	-5.05021	4.41325e-07	0.000213404	chr8	42650727	42651079	si:ch73-138n13.1
peak248280	19.1129	-7.70797	1.74296	-4.42234	9.76362e-06	0.00272521	chr8	44199998	44200246	gpr133
peak248280	19.1129	-7.70797	1.74296	-4.42234	9.76362e-06	0.00272521	chr8	44199998	44200246	stx2b
peak248418	142.413	-4.05721	0.471637	-8.60239	7.80755e-18	3.77537e-14	chr8	44940537	44941370	si:ch211-227i14.2
peak248418	142.413	-4.05721	0.471637	-8.60239	7.80755e-18	3.77537e-14	chr8	44940537	44941370	zgc:154046
peak248675	28.5113	-4.1433	0.981891	-4.21971	2.44611e-05	0.00561806	chr8	47007187	47007420	arhgef16
peak248675	28.5113	-4.1433	0.981891	-4.21971	2.44611e-05	0.00561806	chr8	47007187	47007420	espn
peak248732	17.3517	-6.16204	1.69432	-3.63689	0.000275947	0.0357243	chr8	47343091	47343297	pex10
peak248867	134.25	-1.94928	0.410781	-4.74531	2.08191e-06	0.000787493	chr8	48095741	48096046	mfn2
peak248867	134.25	-1.94928	0.410781	-4.74531	2.08191e-06	0.000787493	chr8	48095741	48096046	prdm16
peak248968	32.3377	-2.94516	0.804258	-3.66196	0.000250297	0.0335563	chr8	48424137	48424341	nppa
peak248968	32.3377	-2.94516	0.804258	-3.66196	0.000250297	0.0335563	chr8	48424137	48424341	prdm16
peak249001	38.2423	-3.25489	0.802773	-4.05455	5.02303e-05	0.00982335	chr8	48527155	48527409	nppa
peak249001	38.2423	-3.25489	0.802773	-4.05455	5.02303e-05	0.00982335	chr8	48527155	48527409	prdm16
peak249042	49.1418	-6.69419	1.20424	-5.55884	2.71569e-08	1.94351e-05	chr8	48768621	48768915	clcn6
peak249042	49.1418	-6.69419	1.20424	-5.55884	2.71569e-08	1.94351e-05	chr8	48768621	48768915	wrap73
peak249055	19.3709	-7.72667	1.73931	-4.44238	8.89713e-06	0.00252671	chr8	48836381	48836804	clcn6
peak249055	19.3709	-7.72667	1.73931	-4.44238	8.89713e-06	0.00252671	chr8	48836381	48836804	wrap73
peak249637	22.5081	-4.40893	1.12197	-3.92964	8.50733e-05	0.0145655	chr8	52003033	52003256	gna14a
peak249637	22.5081	-4.40893	1.12197	-3.92964	8.50733e-05	0.0145655	chr8	52003033	52003256	tcf7l1b
peak249961	31.8394	-4.00396	0.908306	-4.40816	1.04253e-05	0.00285206	chr8	53362356	53362663	gabrd
peak249961	31.8394	-4.00396	0.908306	-4.40816	1.04253e-05	0.00285206	chr8	53362356	53362663	gnb1a
peak250036	43.9443	-4.00341	0.773682	-5.1745	2.28527e-07	0.000118858	chr8	53657541	53658099	rho
peak250036	43.9443	-4.00341	0.773682	-5.1745	2.28527e-07	0.000118858	chr8	53657541	53658099	ubiad1
peak250075	27.48	-5.98685	1.36225	-4.39482	1.10863e-05	0.00296932	chr8	53841679	53842241	trh
peak250075	27.48	-5.98685	1.36225	-4.39482	1.10863e-05	0.00296932	chr8	53841679	53842241	wnt5a
peak250123	47.6742	-2.55821	0.652622	-3.91989	8.85891e-05	0.0150094	chr8	54073526	54073993	trh
peak250123	47.6742	-2.55821	0.652622	-3.91989	8.85891e-05	0.0150094	chr8	54073526	54073993	wnt5a
peak250158	60.0214	-3.17882	0.606683	-5.23967	1.60862e-07	8.80683e-05	chr8	54169401	54169700	trh
peak250180	121.337	-1.59587	0.437844	-3.64484	0.000267554	0.0350948	chr9	43660	44026	zgc:158316
peak250198	56.955	-3.70637	0.665299	-5.57099	2.53301e-08	1.83479e-05	chr9	119193	119479	lims2
peak250198	56.955	-3.70637	0.665299	-5.57099	2.53301e-08	1.83479e-05	chr9	119193	119479	si:ch1073-55a19.2
peak250200	70.2881	-2.6744	0.561153	-4.7659	1.88014e-06	0.000728108	chr9	120357	120645	lims2
peak250200	70.2881	-2.6744	0.561153	-4.7659	1.88014e-06	0.000728108	chr9	120357	120645	si:ch1073-55a19.2
peak250201	43.3361	-2.79445	0.712696	-3.92096	8.81977e-05	0.0149714	chr9	121312	121551	lims2
peak250209	70.4906	-2.86164	0.556208	-5.14492	2.67632e-07	0.000135647	chr9	171974	172265	NA
peak250212	75.1622	-4.15358	0.605806	-6.85629	7.06734e-12	1.37441e-08	chr9	180706	181204	NA
peak250246	125.171	-2.25446	0.424947	-5.30527	1.12508e-07	6.70588e-05	chr9	332836	333281	actr5
peak250246	125.171	-2.25446	0.424947	-5.30527	1.12508e-07	6.70588e-05	chr9	332836	333281	si:dkey-11f4.4
peak250275	38.7546	-5.05532	1.00046	-5.05301	4.34899e-07	0.000210867	chr9	486701	486930	NA
peak250277	92.858	-2.89851	0.505612	-5.73268	9.88561e-09	8.62772e-06	chr9	490329	490642	NA
peak250344	19.1686	-4.51377	1.27663	-3.5357	0.0004067	0.0471151	chr9	726734	726950	usp37
peak250344	19.1686	-4.51377	1.27663	-3.5357	0.0004067	0.0471151	chr9	726734	726950	ybey
peak250389	25.1837	-6.53477	1.56823	-4.16697	3.08671e-05	0.00673933	chr9	874113	874372	c1ql2
peak250389	25.1837	-6.53477	1.56823	-4.16697	3.08671e-05	0.00673933	chr9	874113	874372	zgc:101851
peak250503	112.001	-3.89652	0.480821	-8.10389	5.32308e-16	2.07039e-12	chr9	1316861	1317321	casp8l2
peak250503	112.001	-3.89652	0.480821	-8.10389	5.32308e-16	2.07039e-12	chr9	1316861	1317321	gpr1
peak251209	17.8058	-5.21885	1.45859	-3.57801	0.000346227	0.0423701	chr9	4275680	4275905	kalrna
peak251209	17.8058	-5.21885	1.45859	-3.57801	0.000346227	0.0423701	chr9	4275680	4275905	mylka
peak251691	46.8243	-3.22796	0.855099	-3.77495	0.000160037	0.0236051	chr9	6874787	6875309	pou3f3a
peak251691	46.8243	-3.22796	0.855099	-3.77495	0.000160037	0.0236051	chr9	6874787	6875309	tmem182
peak252147	194.28	-4.81793	0.452537	-10.6465	1.81044e-26	3.59905e-22	chr9	9199307	9200377	NA
peak252279	20.6375	-4.63736	1.27095	-3.64873	0.000263539	0.0347466	chr9	9963993	9964259	prmt2
peak252279	20.6375	-4.63736	1.27095	-3.64873	0.000263539	0.0347466	chr9	9963993	9964259	si:ch1073-303l5.1
peak252282	61.6392	-3.44669	0.64139	-5.37378	7.71027e-08	4.92673e-05	chr9	9988074	9988349	prmt2
peak252282	61.6392	-3.44669	0.64139	-5.37378	7.71027e-08	4.92673e-05	chr9	9988074	9988349	si:ch1073-303l5.1
peak252354	53.0227	-6.83321	1.20567	-5.66758	1.44828e-08	1.14149e-05	chr9	10314871	10315280	cxcr4b
peak252354	53.0227	-6.83321	1.20567	-5.66758	1.44828e-08	1.14149e-05	chr9	10314871	10315280	hnmt
peak252698	35.7662	-2.91687	0.823147	-3.54356	0.000394769	0.0461333	chr9	12107433	12107874	nup35
peak252698	35.7662	-2.91687	0.823147	-3.54356	0.000394769	0.0461333	chr9	12107433	12107874	znf804a
peak252790	17.666	-7.59291	1.76528	-4.30124	1.69845e-05	0.00416271	chr9	12547844	12548087	igf2bp2a
peak252790	17.666	-7.59291	1.76528	-4.30124	1.69845e-05	0.00416271	chr9	12547844	12548087	tmem41aa
peak252810	310.575	-1.15034	0.260145	-4.4219	9.78351e-06	0.00272651	chr9	12623345	12624175	tra2b
peak253179	62.2857	-2.73833	0.577586	-4.741	2.12667e-06	0.000802727	chr9	14024815	14025177	raph1
peak253179	62.2857	-2.73833	0.577586	-4.741	2.12667e-06	0.000802727	chr9	14024815	14025177	si:ch211-67e16.5
peak253181	15.1366	-7.37098	1.81367	-4.06413	4.82128e-05	0.00956319	chr9	14026974	14027174	raph1
peak253181	15.1366	-7.37098	1.81367	-4.06413	4.82128e-05	0.00956319	chr9	14026974	14027174	si:ch211-67e16.5
peak253193	65.8978	-4.17955	0.648009	-6.44983	1.11972e-10	1.68349e-07	chr9	14119943	14120380	si:ch211-67e16.5
peak254145	35.206	-2.69661	0.76473	-3.52623	0.000421522	0.0484995	chr9	19234346	19234691	htr1fa
peak254145	35.206	-2.69661	0.76473	-3.52623	0.000421522	0.0484995	chr9	19234346	19234691	pou1f1
peak254517	39.8837	-3.30815	0.771528	-4.28779	1.80463e-05	0.00437207	chr9	21391589	21391810	hsd3b1
peak254517	39.8837	-3.30815	0.771528	-4.28779	1.80463e-05	0.00437207	chr9	21391589	21391810	popdc2
peak254593	19.6705	-4.22898	1.19574	-3.53671	0.000405138	0.0470379	chr9	21657518	21657758	mphosph8
peak254593	19.6705	-4.22898	1.19574	-3.53671	0.000405138	0.0470379	chr9	21657518	21657758	zmym2
peak254929	56.9375	-3.32212	0.638388	-5.20392	1.9513e-07	0.000103595	chr9	23235412	23235669	mmadhc
peak25508	122.682	-2.58527	0.418215	-6.18167	6.34269e-10	7.93568e-07	chr11	25944890	25945260	prdm2b
peak25508	122.682	-2.58527	0.418215	-6.18167	6.34269e-10	7.93568e-07	chr11	25944890	25945260	zgc:158299
peak255111	79.5092	-3.27408	0.535433	-6.11483	9.6658e-10	1.13773e-06	chr9	23955220	23955516	si:ch211-219a4.3
peak255111	79.5092	-3.27408	0.535433	-6.11483	9.6658e-10	1.13773e-06	chr9	23955220	23955516	si:ch211-219a4.6
peak255201	95.0641	-3.64904	0.506459	-7.20501	5.80416e-13	1.42253e-09	chr9	24348677	24349219	hecw2a
peak255326	43.5362	-6.01918	1.08954	-5.5245	3.30418e-08	2.32743e-05	chr9	25069442	25069736	nabp1a
peak255326	43.5362	-6.01918	1.08954	-5.5245	3.30418e-08	2.32743e-05	chr9	25069442	25069736	slc39a10
peak255332	76.5363	-2.39659	0.514927	-4.65424	3.2518e-06	0.0011319	chr9	25091512	25091824	nabp1a
peak255332	76.5363	-2.39659	0.514927	-4.65424	3.2518e-06	0.0011319	chr9	25091512	25091824	slc39a10
peak255352	38.9336	-3.82783	0.810551	-4.7225	2.32959e-06	0.000857612	chr9	25224717	25225032	dnah7
peak255352	38.9336	-3.82783	0.810551	-4.7225	2.32959e-06	0.000857612	chr9	25224717	25225032	slc39a10
peak255606	146.448	-1.37179	0.378913	-3.62032	0.000294238	0.0374623	chr9	26178688	26179211	arhgap15
peak255606	146.448	-1.37179	0.378913	-3.62032	0.000294238	0.0374623	chr9	26178688	26179211	gtdc1
peak25578	113.449	-1.98162	0.426172	-4.64983	3.32213e-06	0.00115084	chr11	26234772	26235123	st3gal2l
peak25578	113.449	-1.98162	0.426172	-4.64983	3.32213e-06	0.00115084	chr11	26234772	26235123	utp3
peak256553	41.8852	-3.38939	0.752229	-4.50579	6.61253e-06	0.00199845	chr9	30493631	30494021	srpx
peak256553	41.8852	-3.38939	0.752229	-4.50579	6.61253e-06	0.00199845	chr9	30493631	30494021	sytl5
peak256924	33.7996	-3.56001	0.869625	-4.09374	4.24479e-05	0.00871219	chr9	31772684	31772985	nalcn
peak256924	33.7996	-3.56001	0.869625	-4.09374	4.24479e-05	0.00871219	chr9	31772684	31772985	si:ch211-168k14.2
peak257137	62.6206	-2.33128	0.580428	-4.01648	5.90738e-05	0.0110556	chr9	32838212	32838473	dnajb11
peak257137	62.6206	-2.33128	0.580428	-4.01648	5.90738e-05	0.0110556	chr9	32838212	32838473	rabl3
peak257252	24.5048	-5.80412	1.37732	-4.21407	2.50806e-05	0.00573758	chr9	33263762	33264027	si:ch211-125e6.5
peak257252	24.5048	-5.80412	1.37732	-4.21407	2.50806e-05	0.00573758	chr9	33263762	33264027	zgc:172053
peak257288	18.1567	-7.63243	1.75735	-4.34316	1.40448e-05	0.00358975	chr9	33415922	33416256	si:ch211-125e6.14
peak257288	18.1567	-7.63243	1.75735	-4.34316	1.40448e-05	0.00358975	chr9	33415922	33416256	si:dkey-216e24.3
peak257498	359.92	-1.00912	0.242328	-4.16427	3.12353e-05	0.00677391	chr9	34191767	34192632	ccdc80
peak257498	359.92	-1.00912	0.242328	-4.16427	3.12353e-05	0.00677391	chr9	34191767	34192632	kdm6a
peak257745	22.5227	-7.94528	1.70102	-4.67089	2.99894e-06	0.00105621	chr9	35133349	35133589	cdc16
peak257745	22.5227	-7.94528	1.70102	-4.67089	2.99894e-06	0.00105621	chr9	35133349	35133589	tfdp1a
peak258379	57.5453	-2.60482	0.638244	-4.08123	4.47978e-05	0.00904627	chr9	38164151	38164525	adcy5
peak258379	57.5453	-2.60482	0.638244	-4.08123	4.47978e-05	0.00904627	chr9	38164151	38164525	sec22a
peak260677	44.6747	-2.55418	0.701869	-3.63911	0.000273579	0.0355205	chr9	49009950	49010515	dhrs9
peak260677	44.6747	-2.55418	0.701869	-3.63911	0.000273579	0.0355205	chr9	49009950	49010515	rdh1
peak261283	48.3726	-4.32031	0.778807	-5.54734	2.90047e-08	2.06748e-05	chr9	52863989	52864329	nme8
peak261283	48.3726	-4.32031	0.778807	-5.54734	2.90047e-08	2.06748e-05	chr9	52863989	52864329	xrcc5
peak261288	75.3261	-2.57628	0.531814	-4.84432	1.27047e-06	0.000526173	chr9	52889091	52889587	nme8
peak261288	75.3261	-2.57628	0.531814	-4.84432	1.27047e-06	0.000526173	chr9	52889091	52889587	smarcal1
peak261303	28.3014	-4.78102	1.05712	-4.52269	6.10581e-06	0.00186102	chr9	53009407	53009703	nme8
peak261303	28.3014	-4.78102	1.05712	-4.52269	6.10581e-06	0.00186102	chr9	53009407	53009703	xrcc5
peak261452	24.8942	-3.98021	1.02239	-3.89303	9.89984e-05	0.0163549	chr9	53705378	53705508	il1rl1
peak261452	24.8942	-3.98021	1.02239	-3.89303	9.89984e-05	0.0163549	chr9	53705378	53705508	sox21b
peak262143	43.6625	-2.7935	0.691044	-4.04243	5.29002e-05	0.010177	chrUn_KN149693v1	1076	1555	NA
peak262148	20.4864	-4.77108	1.23738	-3.85578	0.000115362	0.0182332	chrUn_KN149693v1	20467	20766	NA
peak262168	44.0757	-3.14267	0.744617	-4.22052	2.43743e-05	0.00560531	chrUn_KN149696v1	161756	162335	zgc:112970
peak262168	44.0757	-3.14267	0.744617	-4.22052	2.43743e-05	0.00560531	chrUn_KN149696v1	161756	162335	zgc:174680
peak262217	161.687	-2.73063	0.376353	-7.2555	4.00168e-13	9.9439e-10	chrUn_KN149704v1	14200	14809	sox4b
peak262594	36.1103	-4.37854	0.887641	-4.93278	8.10671e-07	0.000357244	chrUn_KN149789v1	6683	6941	NA
peak262595	140.345	-1.85613	0.387488	-4.79015	1.66656e-06	0.000655323	chrUn_KN149789v1	7237	7692	NA
peak262609	30.3508	-3.84328	0.906686	-4.23882	2.24701e-05	0.00524152	chrUn_KN149790v1	101801	102094	tmem19
peak262609	30.3508	-3.84328	0.906686	-4.23882	2.24701e-05	0.00524152	chrUn_KN149790v1	101801	102094	zgc:171422
peak262769	21.9388	-5.11472	1.28363	-3.98457	6.76012e-05	0.0122305	chrUn_KN149831v1	25102	25369	aga
peak262769	21.9388	-5.11472	1.28363	-3.98457	6.76012e-05	0.0122305	chrUn_KN149831v1	25102	25369	zgc:194336
peak263366	21.9864	-4.06053	1.08588	-3.7394	0.000184458	0.0264371	chrUn_KN149966v1	33166	33477	nrxn2b
peak264311	106.963	-5.01954	1.24563	-4.02971	5.58459e-05	0.0106069	chrUn_KN150151v1	14434	15005	NA
peak264592	28.0214	-6.84589	1.57438	-4.34831	1.37192e-05	0.00352163	chrUn_KN150204v1	89216	89479	NA
peak26478	56.0694	-2.68899	0.613467	-4.38326	1.16915e-05	0.00308979	chr11	30298376	30298666	slc8a1a
peak26478	56.0694	-2.68899	0.613467	-4.38326	1.16915e-05	0.00308979	chr11	30298376	30298666	tmem178
peak26506	99.0902	-3.45052	0.495384	-6.96535	3.27598e-12	6.73704e-09	chr11	30464665	30465385	slc22a7a
peak26506	99.0902	-3.45052	0.495384	-6.96535	3.27598e-12	6.73704e-09	chr11	30464665	30465385	zgc:153943
peak265159	150.005	-2.30468	0.371716	-6.20012	5.64198e-10	7.15912e-07	chrUn_KN150359v1	69604	70688	NA
peak265337	96.3503	-2.34923	0.524487	-4.47909	7.49623e-06	0.00221684	chrUn_KN150411v1	2102	2488	NA
peak265762	22.7242	-5.72401	1.41057	-4.05793	4.9509e-05	0.00975539	chrUn_KN150487v1	93261	93497	NA
peak265763	40.937	-5.49315	1.01959	-5.38758	7.14112e-08	4.61247e-05	chrUn_KN150487v1	95230	95506	NA
peak266198	43.1745	-2.64098	0.690497	-3.82475	0.000130906	0.0201105	chrUn_KN150604v1	11460	11694	aspscr1
peak266198	43.1745	-2.64098	0.690497	-3.82475	0.000130906	0.0201105	chrUn_KN150604v1	11460	11694	rfc4
peak266848	27.6567	-5.96504	1.34399	-4.4383	9.06742e-06	0.00256109	chrUn_KN150709v1	41910	42166	NA
peak27136	67.9443	-4.25275	0.661024	-6.43358	1.24634e-10	1.85134e-07	chr11	33437762	33438089	lims1
peak27136	67.9443	-4.25275	0.661024	-6.43358	1.24634e-10	1.85134e-07	chr11	33437762	33438089	spoplb
peak27157	33.6308	-3.40533	0.853478	-3.98994	6.60903e-05	0.0120659	chr11	33517863	33518228	lims1
peak27157	33.6308	-3.40533	0.853478	-3.98994	6.60903e-05	0.0120659	chr11	33517863	33518228	spoplb
peak2718	24.0812	-4.48771	1.10297	-4.06874	4.72689e-05	0.00942822	chr1	13919623	13920114	pcdh7a
peak2718	24.0812	-4.48771	1.10297	-4.06874	4.72689e-05	0.00942822	chr1	13919623	13920114	rbpja
peak28804	33.158	-4.69467	0.970456	-4.83759	1.3142e-06	0.000540528	chr11	41288526	41288818	aldh4a1
peak28804	33.158	-4.69467	0.970456	-4.83759	1.3142e-06	0.000540528	chr11	41288526	41288818	mrto4
peak28869	69.7115	-2.18268	0.564518	-3.86644	0.000110436	0.0176891	chr11	41493590	41494210	dennd6aa
peak28869	69.7115	-2.18268	0.564518	-3.86644	0.000110436	0.0176891	chr11	41493590	41494210	her15.1
peak28985	25.7137	-6.69618	1.65182	-4.05382	5.03872e-05	0.00983099	chr11	42053005	42053306	dennd6aa
peak28985	25.7137	-6.69618	1.65182	-4.05382	5.03872e-05	0.00983099	chr11	42053005	42053306	her15.1
peak29118	66.2951	-2.94932	0.58943	-5.00368	5.62455e-07	0.000260704	chr11	42634362	42634896	foxg1b
peak29118	66.2951	-2.94932	0.58943	-5.00368	5.62455e-07	0.000260704	chr11	42634362	42634896	tdrd3
peak29928	132.687	-2.94562	0.413718	-7.11986	1.08034e-12	2.54328e-09	chr12	667582	668114	si:ch211-176g6.2
peak29928	132.687	-2.94562	0.413718	-7.11986	1.08034e-12	2.54328e-09	chr12	667582	668114	sult2st2
peak30076	69.2465	-4.65895	0.694904	-6.70445	2.02165e-11	3.61704e-08	chr12	1415032	1415362	cops3
peak30076	69.2465	-4.65895	0.694904	-6.70445	2.02165e-11	3.61704e-08	chr12	1415032	1415362	si:ch73-105m5.1
peak31283	114.04	-2.0739	0.423056	-4.90218	9.47803e-07	0.000407635	chr12	7751372	7751865	ank3b
peak31283	114.04	-2.0739	0.423056	-4.90218	9.47803e-07	0.000407635	chr12	7751372	7751865	ccdc6b
peak31720	199.437	-1.44043	0.351932	-4.09293	4.25965e-05	0.00871985	chr12	9852653	9853251	ndufa4
peak31720	199.437	-1.44043	0.351932	-4.09293	4.25965e-05	0.00871985	chr12	9852653	9853251	ngfrb
peak31811	25.7436	-3.79709	0.96964	-3.91597	9.00403e-05	0.0151691	chr12	10340863	10341092	eef2k
peak31811	25.7436	-3.79709	0.96964	-3.91597	9.00403e-05	0.0151691	chr12	10340863	10341092	ndc80
peak32587	23.3497	-5.63843	1.36832	-4.12068	3.77757e-05	0.0079141	chr12	16651234	16651612	ctslb
peak32587	23.3497	-5.63843	1.36832	-4.12068	3.77757e-05	0.0079141	chr12	16651234	16651612	si:dkey-269i1.4
peak3309	41.7204	-3.64989	0.761584	-4.7925	1.64717e-06	0.000650561	chr1	17260482	17260746	cyp4v8
peak3309	41.7204	-3.64989	0.761584	-4.7925	1.64717e-06	0.000650561	chr1	17260482	17260746	mtnr1aa
peak33207	36.9773	-4.79496	0.952374	-5.03475	4.78481e-07	0.000227679	chr12	20043359	20043640	foxj1b
peak33207	36.9773	-4.79496	0.952374	-5.03475	4.78481e-07	0.000227679	chr12	20043359	20043640	zgc:163057
peak35397	13.9477	-7.25413	1.84188	-3.93843	8.20162e-05	0.0141975	chr12	30764461	30764728	crygmxl2
peak35397	13.9477	-7.25413	1.84188	-3.93843	8.20162e-05	0.0141975	chr12	30764461	30764728	tcf7l2
peak3641	149.647	-2.07413	0.380624	-5.4493	5.05675e-08	3.3633e-05	chr1	19094901	19095480	grhprb
peak3641	149.647	-2.07413	0.380624	-5.4493	5.05675e-08	3.3633e-05	chr1	19094901	19095480	tma16
peak39589	43.3268	-3.7189	0.783091	-4.74899	2.0443e-06	0.000776552	chr13	1692535	1692845	hmgcll1
peak39589	43.3268	-3.7189	0.783091	-4.74899	2.0443e-06	0.000776552	chr13	1692535	1692845	si:ch211-165e15.1
peak40315	35.8175	-2.9905	0.773826	-3.86456	0.00011129	0.01781	chr13	5103904	5104440	abcg2c
peak40315	35.8175	-2.9905	0.773826	-3.86456	0.00011129	0.01781	chr13	5103904	5104440	meis1
peak40612	46.6079	-3.615	0.727747	-4.96739	6.78603e-07	0.000306597	chr13	6184770	6185227	agpat5
peak40612	46.6079	-3.615	0.727747	-4.96739	6.78603e-07	0.000306597	chr13	6184770	6185227	mcph1
peak40900	170.183	-5.88673	0.552113	-10.6622	1.52971e-26	3.4211e-22	chr13	7685521	7686028	exoc3l4
peak40900	170.183	-5.88673	0.552113	-10.6622	1.52971e-26	3.4211e-22	chr13	7685521	7686028	si:ch211-250c4.3
peak41225	32.8909	-3.98435	0.912518	-4.36632	1.26356e-05	0.00325748	chr13	9852204	9852440	gins1
peak41671	52.8189	-3.90653	0.702339	-5.56216	2.66449e-08	1.91452e-05	chr13	11806488	11806777	trim8a
peak41671	52.8189	-3.90653	0.702339	-5.56216	2.66449e-08	1.91452e-05	chr13	11806488	11806777	ube2d3
peak41714	84.1817	-2.05179	0.505822	-4.05636	4.98442e-05	0.0097891	chr13	11955520	11955903	gng2
peak41714	84.1817	-2.05179	0.505822	-4.05636	4.98442e-05	0.0097891	chr13	11955520	11955903	gng2
peak41767	37.6593	-2.92933	0.752802	-3.89124	9.97348e-05	0.0164129	chr13	12459163	12459546	enpep
peak41767	37.6593	-2.92933	0.752802	-3.89124	9.97348e-05	0.0164129	chr13	12459163	12459546	metap1
peak41893	173.493	-1.89322	0.386815	-4.89438	9.86144e-07	0.000423053	chr13	13110904	13111505	NA
peak42849	56.549	-4.83492	0.777385	-6.21947	4.98846e-10	6.61119e-07	chr13	18001226	18001711	alox5
peak42849	56.549	-4.83492	0.777385	-6.21947	4.98846e-10	6.61119e-07	chr13	18001226	18001711	fam21c
peak4334	36.4181	-3.18388	0.856278	-3.71828	0.000200587	0.0282962	chr1	23085533	23085863	lcorl
peak4334	36.4181	-3.18388	0.856278	-3.71828	0.000200587	0.0282962	chr1	23085533	23085863	slit2
peak46425	62.5694	-2.21326	0.563044	-3.93089	8.46312e-05	0.0145401	chr13	33568034	33568568	cst3
peak46425	62.5694	-2.21326	0.563044	-3.93089	8.46312e-05	0.0145401	chr13	33568034	33568568	zgc:163030
peak47166	35.8772	-3.59955	0.808832	-4.45031	8.5746e-06	0.00245853	chr13	36485272	36485613	cdkn3
peak47166	35.8772	-3.59955	0.808832	-4.45031	8.5746e-06	0.00245853	chr13	36485272	36485613	cnih
peak49194	56.9082	-4.44308	0.7133	-6.22891	4.69686e-10	6.27119e-07	chr13	47027222	47027600	acoxl
peak49194	56.9082	-4.44308	0.7133	-6.22891	4.69686e-10	6.27119e-07	chr13	47027222	47027600	anapc1
peak49423	259.005	-1.26135	0.297441	-4.24065	2.22869e-05	0.00520555	chr13	48155142	48155754	fbxo11a
peak49423	259.005	-1.26135	0.297441	-4.24065	2.22869e-05	0.00520555	chr13	48155142	48155754	golga4
peak51078	23.0468	-5.50443	1.33287	-4.12977	3.63133e-05	0.00767059	chr14	4515471	4515785	lbx2
peak51078	23.0468	-5.50443	1.33287	-4.12977	3.63133e-05	0.00767059	chr14	4515471	4515785	zgc:110204
peak51872	58.0656	-3.96229	0.671871	-5.8974	3.69279e-09	3.65025e-06	chr14	8313366	8313924	stx5a
peak51872	58.0656	-3.96229	0.671871	-5.8974	3.69279e-09	3.65025e-06	chr14	8313366	8313924	zgc:153681
peak52205	47.1732	-2.91348	0.672364	-4.33319	1.46965e-05	0.00374028	chr14	10671794	10672215	abcb7
peak52554	35.6799	-3.48524	0.85542	-4.0743	4.61522e-05	0.00926747	chr14	13601704	13602152	cnga5
peak52555	29.9825	-3.43787	0.906528	-3.79235	0.00014923	0.0222681	chr14	13602424	13602730	cnga5
peak53012	37.2874	-3.50635	0.787043	-4.45509	8.38583e-06	0.0024256	chr14	16251572	16252045	canx
peak53012	37.2874	-3.50635	0.787043	-4.45509	8.38583e-06	0.0024256	chr14	16251572	16252045	mgat4b
peak53489	510.932	-2.16106	0.21574	-10.017	1.28367e-23	1.76667e-19	chr14	19788816	19789491	NA
peak54630	34.2884	-6.18975	1.2726	-4.86387	1.15111e-06	0.000483451	chr14	25161213	25161511	slc26a2
peak54630	34.2884	-6.18975	1.2726	-4.86387	1.15111e-06	0.000483451	chr14	25161213	25161511	thoc3
peak55253	56.2288	-3.96489	0.676708	-5.85908	4.65448e-09	4.47718e-06	chr14	27954829	27955519	zgc:113355
peak55253	56.2288	-3.96489	0.676708	-5.85908	4.65448e-09	4.47718e-06	chr14	27954829	27955519	zgc:64189
peak58896	27.6389	-3.51569	0.909937	-3.86366	0.0001117	0.0178475	chr14	42896013	42896395	adra1bb
peak58896	27.6389	-3.51569	0.909937	-3.86366	0.0001117	0.0178475	chr14	42896013	42896395	pcdh10b
peak59417	51.8853	-3.74083	0.700003	-5.34402	9.09052e-08	5.70312e-05	chr14	46250932	46251362	sfxn5b
peak59417	51.8853	-3.74083	0.700003	-5.34402	9.09052e-08	5.70312e-05	chr14	46250932	46251362	shisa3
peak59630	69.7737	-2.95489	0.606146	-4.87488	1.08873e-06	0.000461589	chr14	47229009	47229537	mgst2
peak59630	69.7737	-2.95489	0.606146	-4.87488	1.08873e-06	0.000461589	chr14	47229009	47229537	setd7
peak60810	44.7032	-2.70381	0.725394	-3.72736	0.000193493	0.0274752	chr15	1526921	1527500	ift80
peak60810	44.7032	-2.70381	0.725394	-3.72736	0.000193493	0.0274752	chr15	1526921	1527500	il12a
peak60926	90.4831	-1.93727	0.465169	-4.16465	3.11835e-05	0.00677087	chr15	2190429	2191102	sbds
peak60926	90.4831	-1.93727	0.465169	-4.16465	3.11835e-05	0.00677087	chr15	2190429	2191102	shox2
peak6096	24.4762	-3.58873	0.992668	-3.61524	0.000300066	0.0378966	chr1	33506199	33506462	si:dkey-24h22.4
peak6178	16.5836	-7.50113	1.78436	-4.20381	2.62458e-05	0.00594401	chr1	33872283	33872578	klf12a
peak6178	16.5836	-7.50113	1.78436	-4.20381	2.62458e-05	0.00594401	chr1	33872283	33872578	klf5a
peak61987	59.8434	-2.21319	0.592531	-3.73515	0.000187606	0.0267242	chr15	8435820	8436192	npas3b
peak61987	59.8434	-2.21319	0.592531	-3.73515	0.000187606	0.0267242	chr15	8435820	8436192	tmem160
peak6214	24.9511	-8.09305	1.67775	-4.82376	1.40874e-06	0.000571532	chr1	34292747	34292994	gab1
peak6214	24.9511	-8.09305	1.67775	-4.82376	1.40874e-06	0.000571532	chr1	34292747	34292994	zgc:172122
peak63171	19.5279	-7.73812	1.73716	-4.45448	8.40982e-06	0.0024256	chr15	15822331	15822573	tada2a
peak63171	19.5279	-7.73812	1.73716	-4.45448	8.40982e-06	0.0024256	chr15	15822331	15822573	traf4a
peak63329	39.2529	-3.08007	0.800877	-3.84587	0.000120125	0.0188362	chr15	16455018	16455284	flot2b
peak63329	39.2529	-3.08007	0.800877	-3.84587	0.000120125	0.0188362	chr15	16455018	16455284	tyw1
peak70063	18.6277	-5.67506	1.56762	-3.62018	0.000294397	0.0374623	chr15	47538600	47538827	zgc:153039
peak70063	18.6277	-5.67506	1.56762	-3.62018	0.000294397	0.0374623	chr15	47538600	47538827	zgc:165502
peak70487	55.828	-2.67676	0.607831	-4.4038	1.06372e-05	0.00288795	chr16	1215821	1216117	celf3b
peak70487	55.828	-2.67676	0.607831	-4.4038	1.06372e-05	0.00288795	chr16	1215821	1216117	irx1a
peak71129	194.178	-1.16451	0.321315	-3.62419	0.000289869	0.0370614	chr16	4782965	4783342	arnt
peak71387	213.885	-1.16189	0.315289	-3.68514	0.000228573	0.0312654	chr16	5939429	5940028	cck
peak71387	213.885	-1.16189	0.315289	-3.68514	0.000228573	0.0312654	chr16	5939429	5940028	ulk4
peak72108	82.0076	-5.044	0.658845	-7.65582	1.92078e-14	5.7276e-11	chr16	9137765	9138224	dnah5
peak72108	82.0076	-5.044	0.658845	-7.65582	1.92078e-14	5.7276e-11	chr16	9137765	9138224	trio
peak72148	28.5706	-5.38521	1.22077	-4.41131	1.02748e-05	0.0028277	chr16	9535240	9535484	ccr8.1
peak72149	42.1175	-5.79848	1.05535	-5.49434	3.92164e-08	2.67802e-05	chr16	9535510	9535756	ccr8.1
peak72194	35.141	-6.22294	1.29342	-4.81123	1.50002e-06	0.000600393	chr16	9798940	9799198	wu:fc56a05
peak72194	35.141	-6.22294	1.29342	-4.81123	1.50002e-06	0.000600393	chr16	9798940	9799198	zgc:195265
peak72263	116.343	-3.48045	0.455692	-7.63774	2.21066e-14	6.48393e-11	chr16	10111989	10112338	cep76
peak72263	116.343	-3.48045	0.455692	-7.63774	2.21066e-14	6.48393e-11	chr16	10111989	10112338	id4
peak72580	54.9799	-2.88999	0.671159	-4.30597	1.66256e-05	0.00410286	chr16	11826325	11826666	cxcr3.1
peak72580	54.9799	-2.88999	0.671159	-4.30597	1.66256e-05	0.00410286	chr16	11826325	11826666	zgc:158701
peak7261	18.7566	-5.29469	1.44961	-3.65248	0.000259717	0.0343438	chr1	39248259	39248479	ing2
peak7261	18.7566	-5.29469	1.44961	-3.65248	0.000259717	0.0343438	chr1	39248259	39248479	tmem134
peak72728	64.7664	-2.46174	0.55994	-4.39644	1.10039e-05	0.00295168	chr16	12582142	12582373	si:dkey-26c10.6
peak73026	42.8338	-3.79045	0.761468	-4.97782	6.43044e-07	0.000293495	chr16	14096448	14096793	fdps
peak73026	42.8338	-3.79045	0.761468	-4.97782	6.43044e-07	0.000293495	chr16	14096448	14096793	zgc:162509
peak73107	116.574	-4.26877	0.510133	-8.36796	5.8624e-17	2.49731e-13	chr16	14526387	14527012	crabp2a
peak73107	116.574	-4.26877	0.510133	-8.36796	5.8624e-17	2.49731e-13	chr16	14526387	14527012	crabp2a
peak73235	60.4572	-3.64543	0.634003	-5.74986	8.93165e-09	7.99003e-06	chr16	15399358	15399700	has2
peak73235	60.4572	-3.64543	0.634003	-5.74986	8.93165e-09	7.99003e-06	chr16	15399358	15399700	sntb1
peak73560	93.7132	-2.47886	0.471053	-5.26237	1.42208e-07	8.16652e-05	chr16	17349923	17350266	zgc:136360
peak74182	50.4278	-4.26475	0.737994	-5.77885	7.52151e-09	6.93666e-06	chr16	20993491	20993818	jazf1b
peak74182	50.4278	-4.26475	0.737994	-5.77885	7.52151e-09	6.93666e-06	chr16	20993491	20993818	tax1bp1b
peak74341	426.894	-0.892444	0.249239	-3.58067	0.000342713	0.0419976	chr16	21751254	21751964	mpp6a
peak74341	426.894	-0.892444	0.249239	-3.58067	0.000342713	0.0419976	chr16	21751254	21751964	si:ch211-154o6.2
peak74415	91.3939	-7.13734	1.5992	-4.46306	8.07966e-06	0.00235435	chr16	22218022	22218657	il6r
peak74415	91.3939	-7.13734	1.5992	-4.46306	8.07966e-06	0.00235435	chr16	22218022	22218657	znf687a
peak74418	15.4199	-7.39882	1.8075	-4.09339	4.25104e-05	0.00871219	chr16	22259638	22259987	il6r
peak74418	15.4199	-7.39882	1.8075	-4.09339	4.25104e-05	0.00871219	chr16	22259638	22259987	znf687a
peak75967	89.7342	-2.10093	0.5192	-4.04647	5.19968e-05	0.0100464	chr16	29337917	29338263	mef2d
peak75967	89.7342	-2.10093	0.5192	-4.04647	5.19968e-05	0.0100464	chr16	29337917	29338263	rhbg
peak75982	60.8494	-3.87314	0.691513	-5.60096	2.13165e-08	1.58351e-05	chr16	29390062	29390510	bcan
peak75982	60.8494	-3.87314	0.691513	-5.60096	2.13165e-08	1.58351e-05	chr16	29390062	29390510	hapln2
peak76368	21.4788	-3.77315	1.06384	-3.54673	0.000390045	0.0458041	chr16	31098521	31098793	dgat1b
peak76368	21.4788	-3.77315	1.06384	-3.54673	0.000390045	0.0458041	chr16	31098521	31098793	scrt1b
peak76436	39.597	-3.20537	0.796879	-4.0224	5.76072e-05	0.0108486	chr16	31512545	31512889	si:ch211-251p5.5
peak76499	131.425	-1.61513	0.390547	-4.13555	3.54098e-05	0.00752417	chr16	31770054	31770565	ptpn6
peak76499	131.425	-1.61513	0.390547	-4.13555	3.54098e-05	0.00752417	chr16	31770054	31770565	rbp1a
peak76875	125.16	-2.51227	0.421324	-5.96281	2.47933e-09	2.5641e-06	chr16	33245894	33246697	pou3f1
peak76875	125.16	-2.51227	0.421324	-5.96281	2.47933e-09	2.5641e-06	chr16	33245894	33246697	rragca
peak77410	74.3067	-3.81611	0.638254	-5.97898	2.24535e-09	2.34928e-06	chr16	35442817	35443474	ctps1b
peak77410	74.3067	-3.81611	0.638254	-5.97898	2.24535e-09	2.34928e-06	chr16	35442817	35443474	rab42b
peak77593	90.0521	-1.63297	0.461916	-3.5352	0.000407461	0.0471545	chr16	36302301	36302597	capn7
peak77642	105.804	-1.87628	0.434696	-4.31631	1.58661e-05	0.00397547	chr16	36665496	36665890	col6a6
peak77642	105.804	-1.87628	0.434696	-4.31631	1.58661e-05	0.00397547	chr16	36665496	36665890	ptprub
peak77996	90.8861	-5.81936	0.759205	-7.66507	1.7873e-14	5.41991e-11	chr16	38444133	38444663	eif3ea
peak77996	90.8861	-5.81936	0.759205	-7.66507	1.7873e-14	5.41991e-11	chr16	38444133	38444663	zgc:113232
peak78504	299.122	-1.36711	0.263743	-5.1835	2.17757e-07	0.000113586	chr16	40590806	40591615	tp53inp1
peak78504	299.122	-1.36711	0.263743	-5.1835	2.17757e-07	0.000113586	chr16	40590806	40591615	zgc:165534
peak79015	32.5074	-4.40018	0.937371	-4.69417	2.6769e-06	0.000965598	chr16	42758670	42758945	dpy19l1l
peak79015	32.5074	-4.40018	0.937371	-4.69417	2.6769e-06	0.000965598	chr16	42758670	42758945	polr3glb
peak79035	66.3651	-3.70494	0.604951	-6.12436	9.10466e-10	1.07878e-06	chr16	42868060	42868290	dpy19l1l
peak79035	66.3651	-3.70494	0.604951	-6.12436	9.10466e-10	1.07878e-06	chr16	42868060	42868290	polr3glb
peak79037	38.9912	-3.2006	0.764775	-4.18502	2.85136e-05	0.00632941	chr16	42879388	42879686	dpy19l1l
peak79037	38.9912	-3.2006	0.764775	-4.18502	2.85136e-05	0.00632941	chr16	42879388	42879686	polr3glb
peak79150	211.214	-3.29275	0.337622	-9.75279	1.79472e-22	2.14069e-18	chr16	43445446	43446132	ccdc127a
peak79150	211.214	-3.29275	0.337622	-9.75279	1.79472e-22	2.14069e-18	chr16	43445446	43446132	psma2
peak79441	69.1918	-2.08214	0.532157	-3.91265	9.12906e-05	0.0153076	chr16	45034936	45035307	sult2st3
peak79454	66.9666	-2.25169	0.543988	-4.13924	3.48464e-05	0.00743093	chr16	45108308	45108662	gapdhs
peak79454	66.9666	-2.25169	0.543988	-4.13924	3.48464e-05	0.00743093	chr16	45108308	45108662	si:dkey-33i11.3
peak79458	74.2634	-5.19069	0.74336	-6.98274	2.89475e-12	6.02226e-09	chr16	45118095	45118454	gapdhs
peak79458	74.2634	-5.19069	0.74336	-6.98274	2.89475e-12	6.02226e-09	chr16	45118095	45118454	si:dkey-33i11.3
peak79465	22.1097	-4.72642	1.24606	-3.79309	0.000148787	0.0222205	chr16	45159774	45160110	si:dkey-33i11.3
peak79465	22.1097	-4.72642	1.24606	-3.79309	0.000148787	0.0222205	chr16	45159774	45160110	si:dkey-33i11.3
peak79480	35.7213	-2.97383	0.802835	-3.70416	0.000212094	0.0294755	chr16	45235509	45235808	si:dkey-33i11.3
peak79480	35.7213	-2.97383	0.802835	-3.70416	0.000212094	0.0294755	chr16	45235509	45235808	si:dkey-33i11.3
peak79724	106.025	-5.1086	0.610151	-8.37268	5.63206e-17	2.45771e-13	chr16	46441327	46441919	rpz
peak79724	106.025	-5.1086	0.610151	-8.37268	5.63206e-17	2.45771e-13	chr16	46441327	46441919	rpz4
peak79813	30.2641	-4.55776	0.993656	-4.58686	4.49955e-06	0.00145576	chr16	46858858	46859110	mios
peak79813	30.2641	-4.55776	0.993656	-4.58686	4.49955e-06	0.00145576	chr16	46858858	46859110	rab11al
peak79964	68.4877	-3.59908	0.590608	-6.09386	1.10223e-09	1.27229e-06	chr16	48008435	48008992	rad21a
peak79964	68.4877	-3.59908	0.590608	-6.09386	1.10223e-09	1.27229e-06	chr16	48008435	48008992	slc25a32b
peak81481	102.064	-1.63776	0.441807	-3.70697	0.000209757	0.0292051	chr17	330670	331403	actc1b
peak81481	102.064	-1.63776	0.441807	-3.70697	0.000209757	0.0292051	chr17	330670	331403	adssl1
peak81608	21.925	-5.68619	1.42123	-4.0009	6.31018e-05	0.0116032	chr17	1005458	1005777	dnajc17
peak83270	16.9451	-5.21205	1.47845	-3.52535	0.000422918	0.0486288	chr17	10671453	10671696	lgals3l
peak83270	16.9451	-5.21205	1.47845	-3.52535	0.000422918	0.0486288	chr17	10671453	10671696	tbpl2
peak83401	84.7506	-3.50244	0.54271	-6.45361	1.09214e-10	1.66847e-07	chr17	11122165	11122468	dact1
peak83401	84.7506	-3.50244	0.54271	-6.45361	1.09214e-10	1.66847e-07	chr17	11122165	11122468	irf2bpl
peak83499	15.1871	-7.37655	1.81253	-4.06975	4.70636e-05	0.00939776	chr17	11485509	11485769	efcab2
peak83499	15.1871	-7.37655	1.81253	-4.06975	4.70636e-05	0.00939776	chr17	11485509	11485769	smyd3
peak83781	97.7986	-1.59681	0.445568	-3.58377	0.000338666	0.0415871	chr17	12884954	12885368	ctage5
peak83781	97.7986	-1.59681	0.445568	-3.58377	0.000338666	0.0415871	chr17	12884954	12885368	fam177a1
peak85078	168.645	-2.81765	0.372945	-7.55516	4.18356e-14	1.15154e-10	chr17	19316288	19316934	galcb
peak85078	168.645	-2.81765	0.372945	-7.55516	4.18356e-14	1.15154e-10	chr17	19316288	19316934	gsc
peak85811	63.7796	-2.43727	0.562824	-4.33043	1.4882e-05	0.0037714	chr17	22723950	22724486	birc6
peak85811	63.7796	-2.43727	0.562824	-4.33043	1.4882e-05	0.0037714	chr17	22723950	22724486	rasgrp3
peak86500	53.2493	-2.65242	0.664619	-3.99088	6.58277e-05	0.0120402	chr17	25600314	25600632	iars2
peak86500	53.2493	-2.65242	0.664619	-3.99088	6.58277e-05	0.0120402	chr17	25600314	25600632	rab3gap2
peak90159	154.191	-2.22611	0.365869	-6.08446	1.16884e-09	1.34053e-06	chr17	43896884	43897278	ktn1
peak90159	154.191	-2.22611	0.365869	-6.08446	1.16884e-09	1.34053e-06	chr17	43896884	43897278	peli2
peak90298	70.4225	-2.48718	0.550291	-4.51975	6.19122e-06	0.00188272	chr17	44471779	44472083	naa30
peak90298	70.4225	-2.48718	0.550291	-4.51975	6.19122e-06	0.00188272	chr17	44471779	44472083	ngb
peak90386	53.9929	-6.80249	1.19458	-5.69448	1.23746e-08	9.88397e-06	chr17	45050205	45050740	capn3a
peak90386	53.9929	-6.80249	1.19458	-5.69448	1.23746e-08	9.88397e-06	chr17	45050205	45050740	tmed8
peak90670	49.6329	-3.36317	0.676146	-4.97403	6.5574e-07	0.000297771	chr17	46968349	46968964	slc39a9
peak90670	49.6329	-3.36317	0.676146	-4.97403	6.5574e-07	0.000297771	chr17	46968349	46968964	zgc:103755
peak90829	43.7422	-3.5473	0.729656	-4.86161	1.16438e-06	0.000487879	chr17	48379551	48379905	kcnk5a
peak90829	43.7422	-3.5473	0.729656	-4.86161	1.16438e-06	0.000487879	chr17	48379551	48379905	slc39a9
peak90830	37.1849	-5.18889	0.990428	-5.23904	1.61418e-07	8.80683e-05	chr17	48382106	48382394	kcnk5a
peak90830	37.1849	-5.18889	0.990428	-5.23904	1.61418e-07	8.80683e-05	chr17	48382106	48382394	slc39a9
peak91807	791.12	-0.718652	0.177121	-4.05741	4.96206e-05	0.00976662	chr17	53292547	53292960	dph6
peak91807	791.12	-0.718652	0.177121	-4.05741	4.96206e-05	0.00976662	chr17	53292547	53292960	ttc8
peak91855	49.1308	-6.87998	1.70089	-4.04494	5.23374e-05	0.0101013	chr18	89858	90117	NA
peak91967	35.7469	-8.61163	1.61097	-5.34562	9.01088e-08	5.67669e-05	chr18	502952	503158	dntt
peak91967	35.7469	-8.61163	1.61097	-5.34562	9.01088e-08	5.67669e-05	chr18	502952	503158	gpib
peak92059	88.4489	-4.85426	0.620362	-7.82488	5.08127e-15	1.65294e-11	chr18	891218	891544	fam219b
peak92165	74.5307	-2.75135	0.53625	-5.13073	2.88617e-07	0.00014505	chr18	1383298	1383691	rab27a
peak92258	58.1011	-2.1881	0.586495	-3.7308	0.000190872	0.0271461	chr18	1898855	1899321	chst8
peak92258	58.1011	-2.1881	0.586495	-3.7308	0.000190872	0.0271461	chr18	1898855	1899321	pepd
peak92471	216.626	-1.32617	0.307924	-4.30681	1.65625e-05	0.00409858	chr18	3056554	3056951	rps3
peak92576	23.8316	-5.28331	1.27848	-4.1325	3.58839e-05	0.00760684	chr18	3558680	3558909	si:ch211-248g20.5
peak92576	23.8316	-5.28331	1.27848	-4.1325	3.58839e-05	0.00760684	chr18	3558680	3558909	zgc:171915
peak92796	29.3139	-5.26166	1.1342	-4.63907	3.49976e-06	0.0011944	chr18	5040282	5040530	serpini1
peak92796	29.3139	-5.26166	1.1342	-4.63907	3.49976e-06	0.0011944	chr18	5040282	5040530	zdhhc7
peak92944	67.799	-4.05206	0.677364	-5.9821	2.20281e-09	2.31833e-06	chr18	5634927	5635168	NA
peak92979	18.2322	-6.23803	1.66036	-3.75703	0.000171941	0.0250308	chr18	5757092	5757322	cplx3b
peak92979	18.2322	-6.23803	1.66036	-3.75703	0.000171941	0.0250308	chr18	5757092	5757322	ulk3
peak94380	50.87	-3.37959	0.684009	-4.94085	7.77812e-07	0.000343611	chr18	12157207	12157786	bicd1a
peak94380	50.87	-3.37959	0.684009	-4.94085	7.77812e-07	0.000343611	chr18	12157207	12157786	fgd4a
peak94436	86.7436	-2.09479	0.478505	-4.37778	1.19897e-05	0.00314329	chr18	12372721	12373196	fam107b
peak94436	86.7436	-2.09479	0.478505	-4.37778	1.19897e-05	0.00314329	chr18	12372721	12373196	hipk2
peak94572	57.683	-3.36077	0.683632	-4.91604	8.83103e-07	0.000385367	chr18	12865911	12866216	parp12a
peak94572	57.683	-3.36077	0.683632	-4.91604	8.83103e-07	0.000385367	chr18	12865911	12866216	tbxas1
peak94985	17.666	-7.59291	1.76528	-4.30124	1.69845e-05	0.00416271	chr18	14720488	14720747	pdf
peak94985	17.666	-7.59291	1.76528	-4.30124	1.69845e-05	0.00416271	chr18	14720488	14720747	uri1
peak95036	97.5451	-4.20117	1.18908	-3.53313	0.000410675	0.0474038	chr18	14892464	14892807	mapk12a
peak95080	20.913	-6.37874	1.69234	-3.76919	0.000163776	0.0240575	chr18	15091782	15092034	btbd11b
peak95080	20.913	-6.37874	1.69234	-3.76919	0.000163776	0.0240575	chr18	15091782	15092034	panx2
peak95948	27.6281	-3.7721	0.954217	-3.95308	7.71515e-05	0.0135168	chr18	18882609	18882833	arl2bp
peak95948	27.6281	-3.7721	0.954217	-3.95308	7.71515e-05	0.0135168	chr18	18882609	18882833	si:dkey-73n10.4
peak95950	38.7774	-4.92594	0.927906	-5.30866	1.10435e-07	6.63034e-05	chr18	18889345	18889596	arih1
peak95950	38.7774	-4.92594	0.927906	-5.30866	1.10435e-07	6.63034e-05	chr18	18889345	18889596	arl2bp
peak95957	99.8062	-2.63072	0.492321	-5.34351	9.11657e-08	5.70312e-05	chr18	18914991	18915656	arih1
peak95957	99.8062	-2.63072	0.492321	-5.34351	9.11657e-08	5.70312e-05	chr18	18914991	18915656	ppcdc
peak96124	30.0648	-4.27127	0.961805	-4.44088	8.95899e-06	0.00254025	chr18	19575633	19575922	smad6b
peak96124	30.0648	-4.27127	0.961805	-4.44088	8.95899e-06	0.00254025	chr18	19575633	19575922	snapc5
peak96132	93.942	-1.67387	0.459563	-3.6423	0.000270209	0.0353137	chr18	19615712	19616142	smad6b
peak96132	93.942	-1.67387	0.459563	-3.6423	0.000270209	0.0353137	chr18	19615712	19616142	snapc5
peak96883	24.4036	-4.09928	1.14611	-3.57669	0.000347967	0.0424959	chr18	22700079	22700368	si:dkey-11d18.4
peak96883	24.4036	-4.09928	1.14611	-3.57669	0.000347967	0.0424959	chr18	22700079	22700368	tmem170a
peak97770	112.488	-1.55291	0.426585	-3.64033	0.000272292	0.0354306	chr18	25968632	25969222	sema4ba
peak97770	112.488	-1.55291	0.426585	-3.64033	0.000272292	0.0354306	chr18	25968632	25969222	znf710a
peak98182	33.847	-3.59785	0.854028	-4.21279	2.52231e-05	0.00574877	chr18	28388115	28388438	maf
peak98182	33.847	-3.59785	0.854028	-4.21279	2.52231e-05	0.00574877	chr18	28388115	28388438	spon1a
peak98434	61.1125	-2.34071	0.580236	-4.03408	5.48178e-05	0.0104405	chr18	30047385	30047655	si:ch211-220f16.2
peak98670	108.089	-1.58949	0.433643	-3.66544	0.000246918	0.033216	chr18	31073406	31073751	gas8
peak98790	30.7096	-3.60657	0.918505	-3.92657	8.61659e-05	0.0146683	chr18	32576090	32576356	elp5
peak98790	30.7096	-3.60657	0.918505	-3.92657	8.61659e-05	0.0146683	chr18	32576090	32576356	v2ra1
peak99379	28.1692	-4.18581	0.985675	-4.24664	2.17002e-05	0.00508239	chr18	36237809	36238115	b3gat1
peak99379	28.1692	-4.18581	0.985675	-4.24664	2.17002e-05	0.00508239	chr18	36237809	36238115	siae
