# Supplementary material for: Mutation of vsx genes in zebrafish highlights the robustness of the retinal specification network
Source: eLife. 2023 May 25;12:e85594. doi: 10.7554/eLife.85594 (PMC10212559; doi:10.7554/eLife.85594)
Supplement: Figure 5—source data 2. — Worksheet #1. Table of contents. Worksheet #2. Gene ontology terms enriched using as input the list of genes associated with differentially open chromatin region from ATAC-seq. [file elife-85594-fig5-data2.xlsx]

## Sheet: SD2_index
worksheet_order	worksheet_title	description
1	SD2_index	Table of contents of Figure 5 - Source Data 2
2	GO_enrichment	Gene ontology terms enriched using as input the list of genes associated with differentially open chromatin region from ATAC-seq

## Sheet: GO_enrichment
GO biological process complete	fold Enrichment	Input	expected	P-value	FDR
neuron cell-cell adhesion (GO:0007158)	12.7	5	0.39	0.000169	0.0111
postsynaptic membrane organization (GO:0001941)	11.72	6	0.51	5.18e-05	0.00398
presynaptic membrane organization (GO:0097090)	11.28	4	0.35	0.00111	0.0486
postsynaptic membrane assembly (GO:0097104)	11.28	4	0.35	0.00111	0.0488
presynaptic membrane assembly (GO:0097105)	11.28	4	0.35	0.00111	0.0491
semicircular canal morphogenesis (GO:0048752)	8.02	6	0.75	0.000278	0.0165
semicircular canal development (GO:0060872)	6.84	7	1.02	0.000198	0.0127
postsynapse organization (GO:0099173)	6.58	7	1.06	0.000241	0.0148
camera-type eye photoreceptor cell differentiation (GO:0060219)	6.35	7	1.1	0.000291	0.0172
neural precursor cell proliferation (GO:0061351)	6.09	6	0.98	0.000952	0.0434
synapse assembly (GO:0007416)	5.35	8	1.5	0.0003	0.0176
embryonic camera-type eye morphogenesis (GO:0048596)	5.08	8	1.58	0.000405	0.022
synaptic vesicle endocytosis (GO:0048488)	4.95	8	1.61	0.000469	0.0243
presynaptic endocytosis (GO:0140238)	4.95	8	1.61	0.000469	0.0245
negative regulation of developmental growth (GO:0048640)	4.72	8	1.69	0.000619	0.0307
embryonic camera-type eye development (GO:0031076)	4.66	9	1.93	0.000312	0.018
synaptic vesicle recycling (GO:0036465)	4.62	8	1.73	0.000708	0.0338
embryonic eye morphogenesis (GO:0048048)	4.57	9	1.97	0.000355	0.02
otolith development (GO:0048840)	4.48	9	2.01	0.000404	0.022
ossification (GO:0001503)	4.42	12	2.72	5.22e-05	0.00397
eye photoreceptor cell differentiation (GO:0001754)	4.38	10	2.28	0.000231	0.0145
camera-type eye morphogenesis (GO:0048593)	4.23	27	6.38	3.21e-09	8.25e-07
retina morphogenesis in camera-type eye (GO:0060042)	4.23	19	4.49	6.73e-07	9.31e-05
negative regulation of cellular response to growth factor stimulus (GO:0090288)	4.1	10	2.44	0.000371	0.0206
sprouting angiogenesis (GO:0002040)	3.82	14	3.66	5.27e-05	0.00398
synapse organization (GO:0050808)	3.73	16	4.29	2.08e-05	0.0018
diencephalon development (GO:0021536)	3.72	12	3.23	0.000225	0.0142
cell migration involved in gastrulation (GO:0042074)	3.49	11	3.15	0.00065	0.0318
regulation of extent of cell growth (GO:0061387)	3.49	11	3.15	0.00065	0.0319
eye morphogenesis (GO:0048592)	3.47	28	8.07	7.68e-08	1.38e-05
positive regulation of nervous system development (GO:0051962)	3.37	15	4.45	0.000105	0.00712
retina development in camera-type eye (GO:0060041)	3.32	28	8.43	1.71e-07	2.96e-05
neural retina development (GO:0003407)	3.29	11	3.35	0.00102	0.0457
photoreceptor cell differentiation (GO:0046530)	3.25	11	3.39	0.00111	0.0493
neural crest cell differentiation (GO:0014033)	3.17	18	5.67	4.54e-05	0.00358
positive regulation of neurogenesis (GO:0050769)	3.17	13	4.1	0.000499	0.025
regulation of developmental growth (GO:0048638)	3.17	13	4.1	0.000499	0.0252
sensory organ morphogenesis (GO:0090596)	3.12	34	10.91	3.49e-08	6.97e-06
regulation of MAP kinase activity (GO:0043405)	3.11	12	3.86	0.000954	0.0433
angiogenesis (GO:0001525)	3.06	30	9.81	3.15e-07	5.06e-05
lateral line system development (GO:0048925)	3.01	14	4.65	0.000496	0.0252
mesenchymal cell differentiation (GO:0048762)	3	19	6.34	5.72e-05	0.00425
regulation of axonogenesis (GO:0050770)	3	13	4.33	0.000804	0.0378
skeletal system development (GO:0001501)	2.98	43	14.41	1.84e-09	5e-07
regulation of cell morphogenesis involved in differentiation (GO:0010769)	2.98	15	5.04	0.000358	0.02
camera-type eye development (GO:0043010)	2.94	43	14.61	2.66e-09	7.03e-07
embryonic skeletal system morphogenesis (GO:0048704)	2.92	20	6.85	5.17e-05	0.004
stem cell development (GO:0048864)	2.91	15	5.16	0.000447	0.0236
mesenchymal cell development (GO:0014031)	2.91	15	5.16	0.000447	0.0238
neural crest cell development (GO:0014032)	2.91	15	5.16	0.000447	0.0239
embryonic cranial skeleton morphogenesis (GO:0048701)	2.89	18	6.22	0.000133	0.00894
axon guidance (GO:0007411)	2.88	27	9.37	3.41e-06	0.000364
forebrain development (GO:0030900)	2.88	16	5.55	0.000321	0.0182
regulation of neuron differentiation (GO:0045664)	2.85	25	8.78	9.34e-06	0.000865
neuron projection guidance (GO:0097485)	2.83	27	9.53	4.52e-06	0.000456
anatomical structure formation involved in morphogenesis (GO:0048646)	2.77	81	29.26	4.62e-15	2.96e-12
blood vessel morphogenesis (GO:0048514)	2.76	34	12.33	4.8e-07	7.2e-05
chordate embryonic development (GO:0043009)	2.75	54	19.65	2.45e-10	9.19e-08
inner ear development (GO:0048839)	2.75	18	6.54	0.000233	0.0144
regeneration (GO:0031099)	2.75	18	6.54	0.000233	0.0145
cartilage development (GO:0051216)	2.75	17	6.18	0.000348	0.0197
embryo development ending in birth or egg hatching (GO:0009792)	2.74	54	19.73	2.8e-10	1.01e-07
embryonic skeletal system development (GO:0048706)	2.73	21	7.68	7.98e-05	0.00569
skeletal system morphogenesis (GO:0048705)	2.72	24	8.82	2.75e-05	0.00226
mesenchyme development (GO:0060485)	2.72	23	8.47	4.09e-05	0.00326
ear development (GO:0043583)	2.72	18	6.62	0.000266	0.0161
regulation of cellular response to growth factor stimulus (GO:0090287)	2.72	15	5.51	0.000837	0.039
stem cell differentiation (GO:0048863)	2.71	22	8.11	6.1e-05	0.0045
cranial skeletal system development (GO:1904888)	2.7	22	8.15	6.52e-05	0.00472
Wnt signaling pathway (GO:0016055)	2.7	17	6.3	0.000425	0.0229
regulation of protein serine/threonine kinase activity (GO:0071900)	2.69	16	5.95	0.000637	0.0315
regulation of cell population proliferation (GO:0042127)	2.68	30	11.19	3.73e-06	0.000389
cell-cell signaling by wnt (GO:0198738)	2.68	17	6.34	0.000454	0.0239
ameboidal-type cell migration (GO:0001667)	2.67	23	8.63	5.3e-05	0.00397
connective tissue development (GO:0061448)	2.66	17	6.38	0.000484	0.0247
tube development (GO:0035295)	2.6	72	27.69	2.6e-12	1.17e-09
sensory organ development (GO:0007423)	2.6	62	23.87	9.64e-11	3.94e-08
tube morphogenesis (GO:0035239)	2.6	56	21.5	7.61e-10	2.44e-07
visual system development (GO:0150063)	2.59	45	17.41	4.65e-08	8.7e-06
eye development (GO:0001654)	2.59	45	17.41	4.65e-08	8.89e-06
sensory system development (GO:0048880)	2.58	55	21.31	1.41e-09	4.22e-07
regulation of neurogenesis (GO:0050767)	2.58	30	11.62	1.07e-05	0.000978
neuron differentiation (GO:0030182)	2.57	78	30.33	6.17e-13	3.08e-10
regulation of neuron projection development (GO:0010975)	2.57	17	6.62	0.000705	0.0339
cell fate commitment (GO:0045165)	2.55	17	6.66	0.00075	0.0356
regulation of nervous system development (GO:0051960)	2.54	33	13	4.4e-06	0.000449
embryonic organ morphogenesis (GO:0048562)	2.52	40	15.87	4.51e-07	6.88e-05
blood vessel development (GO:0001568)	2.51	37	14.77	1.39e-06	0.000176
axonogenesis (GO:0007409)	2.51	35	13.94	2.63e-06	0.000296
plasma membrane bounded cell projection morphogenesis (GO:0120039)	2.49	39	15.68	8.23e-07	0.000109
neuron projection morphogenesis (GO:0048812)	2.49	39	15.68	8.23e-07	0.00011
cell projection morphogenesis (GO:0048858)	2.49	39	15.68	8.23e-07	0.000112
generation of neurons (GO:0048699)	2.47	94	38.01	1.58e-14	8.85e-12
transmembrane receptor protein tyrosine kinase signaling pathway (GO:0007169)	2.47	23	9.29	0.000191	0.0124
negative regulation of developmental process (GO:0051093)	2.47	18	7.29	0.00114	0.0493
axon development (GO:0061564)	2.46	36	14.61	2.66e-06	0.000295
vasculature development (GO:0001944)	2.45	43	17.57	4.3e-07	6.66e-05
cell part morphogenesis (GO:0032990)	2.45	39	15.91	1.7e-06	0.000209
cell morphogenesis involved in neuron differentiation (GO:0048667)	2.45	36	14.69	2.95e-06	0.00032
positive regulation of multicellular organismal process (GO:0051240)	2.45	28	11.42	3.9e-05	0.00313
neurogenesis (GO:0022008)	2.43	100	41.12	5.82e-15	3.49e-12
regionalization (GO:0003002)	2.43	37	15.2	3.65e-06	0.000386
regulation of anatomical structure morphogenesis (GO:0022603)	2.41	40	16.62	1.52e-06	0.000189
cardiovascular system development (GO:0072358)	2.4	43	17.92	6.04e-07	8.49e-05
regulation of cell differentiation (GO:0045595)	2.38	46	19.34	2.85e-07	4.66e-05
regulation of cell development (GO:0060284)	2.37	30	12.64	5.01e-05	0.00392
nervous system development (GO:0007399)	2.36	146	61.99	2.05e-20	1.84e-17
regulation of cell morphogenesis (GO:0022604)	2.36	21	8.9	0.000574	0.0286
regulation of plasma membrane bounded cell projection organization (GO:0120035)	2.35	20	8.51	0.000813	0.038
embryonic morphogenesis (GO:0048598)	2.34	63	26.94	3.99e-09	9.97e-07
cell morphogenesis (GO:0000902)	2.34	49	20.95	2.16e-07	3.6e-05
brain development (GO:0007420)	2.33	42	18.04	2.21e-06	0.000252
positive regulation of developmental process (GO:0051094)	2.33	22	9.45	0.000484	0.0248
regulation of cell projection organization (GO:0031344)	2.33	20	8.59	0.000883	0.0407
animal organ morphogenesis (GO:0009887)	2.32	72	31	4.38e-10	1.46e-07
neuron development (GO:0048666)	2.32	57	24.54	3.2e-08	6.53e-06
anatomical structure morphogenesis (GO:0009653)	2.31	175	75.85	1.18e-23	1.33e-20
central nervous system development (GO:0007417)	2.29	58	25.28	2.94e-08	6.44e-06
head development (GO:0060322)	2.29	43	18.79	2.02e-06	0.000246
cell-cell adhesion (GO:0098609)	2.29	24	10.48	0.000471	0.0244
neuron projection development (GO:0031175)	2.28	43	18.87	2.17e-06	0.000253
taxis (GO:0042330)	2.26	38	16.78	1.09e-05	0.000978
gland development (GO:0048732)	2.25	22	9.77	0.000997	0.045
embryo development (GO:0009790)	2.24	96	42.93	2.54e-12	1.2e-09
embryonic organ development (GO:0048568)	2.24	51	22.76	3.94e-07	6.21e-05
cell morphogenesis involved in differentiation (GO:0000904)	2.24	40	17.84	6.94e-06	0.000678
enzyme linked receptor protein signaling pathway (GO:0007167)	2.24	32	14.3	8.07e-05	0.00571
chemotaxis (GO:0006935)	2.23	36	16.11	2.35e-05	0.002
cellular component morphogenesis (GO:0032989)	2.22	55	24.73	2.11e-07	3.58e-05
regulation of developmental process (GO:0050793)	2.21	75	33.95	1.44e-09	4.18e-07
circulatory system development (GO:0072359)	2.2	77	35.01	8.63e-10	2.68e-07
regulation of multicellular organismal development (GO:2000026)	2.2	60	27.25	5.97e-08	1.1e-05
developmental growth (GO:0048589)	2.19	24	10.95	0.000662	0.032
growth (GO:0040007)	2.19	24	10.95	0.000662	0.0322
tissue development (GO:0009888)	2.11	119	56.28	1.38e-13	7.31e-11
system development (GO:0048731)	2.1	277	131.82	2.56e-32	3.84e-29
locomotion (GO:0040011)	2.1	70	33.28	2.76e-08	6.19e-06
epithelium development (GO:0060429)	2.1	69	32.89	3.84e-08	7.49e-06
cellular developmental process (GO:0048869)	2.09	181	86.76	4.94e-20	4.04e-17
cell differentiation (GO:0030154)	2.08	177	84.99	1.82e-19	1.36e-16
morphogenesis of an epithelium (GO:0002009)	2.08	37	17.8	9.83e-05	0.0068
cell migration (GO:0016477)	2.06	48	23.28	7.64e-06	0.000738
heart development (GO:0007507)	2.06	42	20.4	2.76e-05	0.00226
cell development (GO:0048468)	2.05	97	47.22	1.87e-10	7.3e-08
regulation of transferase activity (GO:0051338)	2.05	27	13.19	0.00117	0.0498
animal organ development (GO:0048513)	2.04	193	94.48	1.96e-20	1.95e-17
multicellular organism development (GO:0007275)	2.02	304	150.73	6.04e-33	1.09e-29
pattern specification process (GO:0007389)	2.02	46	22.72	1.72e-05	0.0015
tissue morphogenesis (GO:0048729)	2.01	45	22.37	2.44e-05	0.00205
biological adhesion (GO:0022610)	2.01	40	19.93	9.06e-05	0.00631
cell adhesion (GO:0007155)	2.01	40	19.93	9.06e-05	0.00636
developmental process (GO:0032502)	1.99	338	169.67	2.63e-36	7.87e-33
regulation of multicellular organismal process (GO:0051239)	1.99	74	37.1	8.55e-08	1.51e-05
cell motility (GO:0048870)	1.99	49	24.58	1.37e-05	0.00121
localization of cell (GO:0051674)	1.99	49	24.58	1.37e-05	0.00122
anatomical structure development (GO:0048856)	1.98	323	162.9	4.97e-34	1.12e-30
regulation of catalytic activity (GO:0050790)	1.94	55	28.32	8.62e-06	0.000816
movement of cell or subcellular component (GO:0006928)	1.89	75	39.7	5.28e-07	7.65e-05
actin cytoskeleton organization (GO:0030036)	1.87	34	18.16	0.00115	0.0495
multicellular organismal process (GO:0032501)	1.85	333	179.79	8.34e-30	1.07e-26
cell-cell signaling (GO:0007267)	1.85	42	22.65	0.000255	0.0156
regulation of molecular function (GO:0065009)	1.83	64	34.93	8.75e-06	0.00082
regulation of localization (GO:0032879)	1.73	56	32.3	0.000141	0.00938
plasma membrane bounded cell projection organization (GO:0120036)	1.73	51	29.54	0.00032	0.0183
cell projection organization (GO:0030030)	1.71	52	30.37	0.000377	0.0208
response to external stimulus (GO:0009605)	1.67	62	37.02	0.000183	0.0119
regulation of RNA metabolic process (GO:0051252)	1.57	133	84.52	5.1e-07	7.52e-05
regulation of transcription, DNA-templated (GO:0006355)	1.57	122	77.75	2.16e-06	0.000259
regulation of nucleic acid-templated transcription (GO:1903506)	1.57	122	77.78	2.17e-06	0.000256
regulation of RNA biosynthetic process (GO:2001141)	1.57	122	77.82	2.18e-06	0.000251
cell surface receptor signaling pathway (GO:0007166)	1.57	72	45.8	0.000309	0.0179
regulation of nucleobase-containing compound metabolic process (GO:0019219)	1.56	136	87.16	5.5e-07	7.84e-05
regulation of cell communication (GO:0010646)	1.55	83	53.64	0.000161	0.0106
regulation of signaling (GO:0023051)	1.54	83	53.92	0.000219	0.0139
regulation of cellular metabolic process (GO:0031323)	1.52	190	125.2	1.32e-08	3.12e-06
regulation of macromolecule metabolic process (GO:0060255)	1.52	188	123.67	1.47e-08	3.39e-06
regulation of primary metabolic process (GO:0080090)	1.52	182	119.85	2.97e-08	6.35e-06
regulation of nitrogen compound metabolic process (GO:0051171)	1.52	179	117.8	3.18e-08	6.65e-06
regulation of gene expression (GO:0010468)	1.52	143	93.97	9.88e-07	0.000129
regulation of cellular macromolecule biosynthetic process (GO:2000112)	1.52	129	85.07	5.41e-06	0.00054
regulation of biosynthetic process (GO:0009889)	1.51	132	87.32	4.11e-06	0.000424
regulation of macromolecule biosynthetic process (GO:0010556)	1.51	129	85.43	5.71e-06	0.000564
regulation of metabolic process (GO:0019222)	1.5	200	133.08	1.01e-08	2.46e-06
regulation of signal transduction (GO:0009966)	1.5	71	47.38	0.00117	0.0501
regulation of cellular biosynthetic process (GO:0031326)	1.49	129	86.49	1.09e-05	0.000986
response to chemical (GO:0042221)	1.49	87	58.45	0.000377	0.0207
regulation of response to stimulus (GO:0048583)	1.48	94	63.72	0.000301	0.0176
positive regulation of metabolic process (GO:0009893)	1.48	81	54.9	0.000922	0.0423
regulation of biological quality (GO:0065008)	1.47	108	73.53	0.000108	0.0073
positive regulation of cellular process (GO:0048522)	1.45	117	80.86	0.000102	0.00697
positive regulation of biological process (GO:0048518)	1.44	135	93.5	2.79e-05	0.00226
cellular component organization or biogenesis (GO:0071840)	1.41	196	139.11	1.35e-06	0.000173
cellular component organization (GO:0016043)	1.41	187	132.92	2.76e-06	0.000302
phosphorus metabolic process (GO:0006793)	1.39	106	76.09	0.000866	0.0401
phosphate-containing compound metabolic process (GO:0006796)	1.39	105	75.46	0.00102	0.0455
localization (GO:0051179)	1.3	184	141.43	0.000267	0.016
biological regulation (GO:0065007)	1.29	468	362.77	2.31e-11	9.87e-09
regulation of biological process (GO:0050789)	1.29	432	334.38	3.07e-10	1.06e-07
regulation of cellular process (GO:0050794)	1.29	408	315.16	1.5e-09	4.22e-07
primary metabolic process (GO:0044238)	1.27	289	227.25	8.39e-06	0.000803
cellular macromolecule metabolic process (GO:0044260)	1.27	186	146.39	0.000762	0.0361
cellular process (GO:0009987)	1.26	620	492.7	2.37e-15	1.64e-12
nitrogen compound metabolic process (GO:0006807)	1.26	263	209.25	6.46e-05	0.00472
macromolecule metabolic process (GO:0043170)	1.26	232	184.83	0.000264	0.016
signaling (GO:0023052)	1.26	195	155.33	0.00101	0.0456
biological_process (GO:0008150)	1.25	874	700.5	1.13e-37	5.09e-34
organic substance metabolic process (GO:0071704)	1.25	302	241.74	2.13e-05	0.00182
cellular metabolic process (GO:0044237)	1.24	284	228.59	6.67e-05	0.0048
organonitrogen compound metabolic process (GO:1901564)	1.24	204	163.92	0.00112	0.0485
metabolic process (GO:0008152)	1.23	325	263.96	2.63e-05	0.00219
