# Supplementary material for: Mutation of vsx genes in zebrafish highlights the robustness of the retinal specification network
Source: eLife. 2023 May 25;12:e85594. doi: 10.7554/eLife.85594 (PMC10212559; doi:10.7554/eLife.85594)
Supplement: Figure 5—source data 3. — Worksheet #1. Table of contents. Worksheet #2. List of differentially expressed genes (DEGs) with q-value <0.05 between WT and vsxKO embryos Worksheet #3. Cross-list between DEGs from worksheet #2 and differentially open chromatin regions (DOCRs) more accessible in the vsxKO. Every DEG may be associated with more than one DOCR (column M). Worksheet #4. Cross-list between DEGs from worksheet #2 and differentially open chromatin regions (DOCRs) less accessible in the vsxKO. Every DEG may be associated with more than one DOCR (column M). [file elife-85594-fig5-data3.xlsx]

## Sheet: SD3_index
worksheet_order	worksheet_title	description
1	SD3_index	Table of contents Figure 5 - Source Data 3
2	DEGs_WT_vs_vsxKO (1018)	List of differentially expressed genes (DEGs) with q-value < 0.05 between WT and vsxKO embryos
3	gene_UPpeak	Cross-list between DEGs from worksheet #2 and differentially open chromatin regions (DOCRs) more accessible in the vsxKO. Every DEG may be associated with more than one DOCR (column M).
4	gene_DOWNpeak	Cross-list between DEGs from worksheet #2 and differentially open chromatin regions (DOCRs) less accessible in the vsxKO. Every DEG may be associated with more than one DOCR (column M).

## Sheet: DEGs_WT_vs_vsxKO(1018)
gene_id	gene	locus	sample_1	sample_2	status	value_1	value_2	V1+V2	log2.fold_change	test_stat	p_value	q_value	significant
ENSDARG00000079145	CABZ01077217.1	22:8286252-8295853	wt	mut	OK	11.0564	0	11.0564	#NAME?	#NAME?	5e-05	0.0012271	yes
ENSDARG00000088388	si:ch73-6l19.2	8:50754328-50789104	wt	mut	OK	37.4936	0	37.4936	#NAME?	#NAME?	5e-05	0.0012271	yes
ENSDARG00000038248	ggact.2	1:2299201-2305391	wt	mut	OK	0	18.2385	18.2385	inf	#NAME?	5e-05	0.0012271	yes
ENSDARG00000000837	snx9a	17:33205782-33249329	wt	mut	OK	1.50164	2.76552	4.26716	0.881008	1.63887	0.00415	0.0422918	yes
ENSDARG00000070579	ggact.3	1:2299201-2305391	wt	mut	OK	0	19.657	19.657	inf	#NAME?	5e-05	0.0012271	yes
ENSDARG00000087015	Metazoa_SRP	20:10066164-10066461	wt	mut	OK	0	127.629	127.629	inf	#NAME?	5e-05	0.0012271	yes
ENSDARG00000099132	U3	1:16234786-16235002	wt	mut	OK	27.2753	918.673	945.948	5.07389	8.67133	5e-05	0.0012271	yes
ENSDARG00000105682	si:ch211-122f10.5	7:51550486-51551168	wt	mut	OK	1.70961	33.3075	35.0171	4.28411	8.05454	0.00015	0.00315604	yes
ENSDARG00000087102	si:ch1073-164k15.3	24:38761121-38769920	wt	mut	OK	0.8318	14.2064	15.0382	4.09416	4.54359	5e-05	0.0012271	yes
ENSDARG00000074854	sh2d1ab	14:8811211-8822905	wt	mut	OK	1.10548	12.2575	13.363	3.47091	5.69191	5e-05	0.0012271	yes
ENSDARG00000096403	si:dkey-153m14.1	20:55338635-55339525	wt	mut	OK	35.014	352.984	387.998	3.3336	11.2578	5e-05	0.0012271	yes
ENSDARG00000041115	cnfn	16:11899737-11908092	wt	mut	OK	8.83566	85.3965	94.2322	3.27277	9.76495	5e-05	0.0012271	yes
ENSDARG00000094331	si:dkey-189n19.3	2:11433214-11685055	wt	mut	OK	2.65401	20.0305	22.6845	2.91595	4.14801	5e-05	0.0012271	yes
ENSDARG00000096729	si:dkeyp-104f11.2	20:47200980-47202558	wt	mut	OK	95.3868	661.269	756.656	2.79338	5.45442	5e-05	0.0012271	yes
ENSDARG00000035852	cart3	7:52691506-52692368	wt	mut	OK	5.90494	39.9356	45.8405	2.75768	6.92561	5e-05	0.0012271	yes
ENSDARG00000002293	si:ch211-197g15.9	22:17435605-17474535	wt	mut	OK	2.14759	4.02555	6.17314	0.90647	1.8619	0.0026	0.0298455	yes
ENSDARG00000002299	arsh	9:56225933-56244631	wt	mut	OK	3.76855	1.61456	5.38311	-1.22287	-2.92624	5e-05	0.0012271	yes
ENSDARG00000097737	si:dkey-188h10.3	3:55223548-55224870	wt	mut	OK	9.52298	60.2188	69.7418	2.66073	8.27525	5e-05	0.0012271	yes
ENSDARG00000002411	pde4cb	11:6675128-6783536	wt	mut	OK	3.61452	2.38061	5.99513	-0.602474	-1.75731	0.0023	0.0272167	yes
ENSDARG00000002508	ankrd33ab	6:39281567-39288493	wt	mut	OK	1.12042	0.425274	1.54569	-1.39757	-1.48032	0.0042	0.042525	yes
ENSDARG00000002533	adora2b	5:62096899-62116998	wt	mut	OK	3.72228	2.13072	5.853	-0.804846	-1.74792	0.0037	0.0388297	yes
ENSDARG00000092475	znf1109	4:57902137-57987536	wt	mut	OK	2.00362	12.2643	14.2679	2.61378	4.00923	5e-05	0.0012271	yes
ENSDARG00000002707	her11	14:30198167-30200653	wt	mut	OK	2.68745	1.21605	3.9035	-1.14404	-1.86718	0.00315	0.034375	yes
ENSDARG00000002795	meis3	15:6840537-6866520	wt	mut	OK	5.4774	2.63528	8.11268	-1.05553	-2.58161	5e-05	0.0012271	yes
ENSDARG00000056292	vsx1	17:21043566-21046269	wt	mut	OK	3.91818	23.9811	27.8993	2.61364	8.21527	5e-05	0.0012271	yes
ENSDARG00000102848	si:ch211-215p11.5	4:45204486-45224791	wt	mut	OK	1.57125	9.1552	10.7264	2.54268	5.19538	5e-05	0.0012271	yes
ENSDARG00000003046	sorbs2a	1:17054718-17110677	wt	mut	OK	1.59255	0.966315	2.55886	-0.720777	-1.83281	0.0021	0.0254612	yes
ENSDARG00000096757	si:ch73-205h11.1	12:31422701-31441102	wt	mut	OK	3.72958	20.8654	24.595	2.48403	6.91629	5e-05	0.0012271	yes
ENSDARG00000003208	pomk	13:9216825-9226400	wt	mut	OK	1.61712	0.900468	2.51759	-0.844682	-2.1929	0.0002	0.00399838	yes
ENSDARG00000089382	zgc:158463	5:825788-827000	wt	mut	OK	24.4852	116.363	140.848	2.24865	7.90052	5e-05	0.0012271	yes
ENSDARG00000003281	pik3ip1	5:20362771-20375727	wt	mut	OK	4.3142	2.54042	6.85462	-0.764026	-2.0952	0.0005	0.00833478	yes
ENSDARG00000003403	tenm1	5:20790406-21015713	wt	mut	OK	1.19979	0.457227	1.65702	-1.3918	-3.91036	5e-05	0.0012271	yes
ENSDARG00000003420	chrna5	18:40496136-40518814	wt	mut	OK	4.03638	0.686068	4.72245	-2.55664	-4.8312	5e-05	0.0012271	yes
ENSDARG00000094023	si:dkeyp-79f4.1	4:23401768-23402535	wt	mut	OK	3.07778	13.4041	16.4819	2.12271	3.55302	5e-05	0.0012271	yes
ENSDARG00000003706	ryr2b	17:19989295-20098408	wt	mut	OK	0.491673	0.775276	1.26695	0.65701	1.96064	0.00095	0.0139255	yes
ENSDARG00000003808	aqp3a	5:42406268-42411661	wt	mut	OK	4.16922	1.6085	5.77772	-1.37406	-3.20687	5e-05	0.0012271	yes
ENSDARG00000083760	SCARNA6	15:45576284-45622078	wt	mut	OK	580.674	2404.84	2985.51	2.05014	4.50248	5e-05	0.0012271	yes
ENSDARG00000003900	si:dkeyp-111e5.4	6:42034299-42039149	wt	mut	OK	0.355343	0.8134	1.16874	1.19475	1.77645	0.0037	0.0388297	yes
ENSDARG00000101823	si:ch211-243p7.3	8:47737926-47762948	wt	mut	OK	2.95017	11.7455	14.6957	1.99324	7.5636	5e-05	0.0012271	yes
ENSDARG00000103748	ovca2	10:35706783-35724724	wt	mut	OK	3.03816	11.7346	14.7728	1.94949	4.69181	5e-05	0.0012271	yes
ENSDARG00000004115	mgat4b	14:16178272-16448609	wt	mut	OK	1.68299	0.98116	2.66415	-0.778466	-1.82744	0.0015	0.0196952	yes
ENSDARG00000004141	zgc:92630	15:15479600-15501508	wt	mut	OK	1.4858	4.7035	6.1893	1.6625	3.66139	5e-05	0.0012271	yes
ENSDARG00000097066	si:dkey-19d21.1	15:30068592-30069321	wt	mut	OK	2.63714	10.1278	12.7649	1.94127	3.59491	5e-05	0.0012271	yes
ENSDARG00000056638	pir	11:29670438-29699753	wt	mut	OK	2.63246	10.1014	12.7339	1.94007	4.41134	5e-05	0.0012271	yes
ENSDARG00000004301	rhogb	21:30900994-30915214	wt	mut	OK	2.91791	0.965287	3.8832	-1.5959	-3.37292	5e-05	0.0012271	yes
ENSDARG00000004363	lhfp	10:32007477-32094403	wt	mut	OK	2.07456	3.74123	5.81579	0.850707	2.22941	0.00015	0.00315604	yes
ENSDARG00000026236	zgc:56585	21:34780323-34809569	wt	mut	OK	5.35312	20.2312	25.5843	1.91813	3.6563	5e-05	0.0012271	yes
ENSDARG00000062045	il1rapl1a	9:29905633-30183392	wt	mut	OK	5.07029	18.3656	23.4359	1.85686	4.05818	5e-05	0.0012271	yes
ENSDARG00000078322	col12a1a	17:49685589-49879081	wt	mut	OK	5.16514	18.6766	23.8417	1.85435	3.01737	5e-05	0.0012271	yes
ENSDARG00000029955	glb1l	9:12863210-12914063	wt	mut	OK	4.07488	14.462	18.5369	1.82744	3.68535	5e-05	0.0012271	yes
ENSDARG00000098412	U3	20:3308907-3309124	wt	mut	OK	15.8191	55.9514	71.7705	1.8225	2.30249	0.00245	0.02858	yes
ENSDARG00000012395	mmp13a	10:38649904-38676122	wt	mut	OK	2.34632	8.26907	10.6154	1.81733	4.70047	5e-05	0.0012271	yes
ENSDARG00000004712	tbr1b	9:51970052-51976287	wt	mut	OK	1.57125	2.42303	3.99428	0.624905	1.77707	0.0022	0.0263587	yes
ENSDARG00000097247	si:dkey-19d21.2	15:30069916-30073354	wt	mut	OK	3.69869	12.9293	16.628	1.80556	3.87141	5e-05	0.0012271	yes
ENSDARG00000004880	acsm3	2:44872551-44893725	wt	mut	OK	0.997863	1.57003	2.56789	0.653882	1.63699	0.005	0.0482736	yes
ENSDARG00000103405	znf1102	4:37161730-37168614	wt	mut	OK	2.79572	9.708	12.5037	1.79595	4.93702	5e-05	0.0012271	yes
ENSDARG00000101312	si:dkey-31n13.4	4:45277996-45528822	wt	mut	OK	2.54485	8.74012	11.285	1.78007	4.69791	5e-05	0.0012271	yes
ENSDARG00000097074	si:dkey-19d21.3	15:30066801-30068139	wt	mut	OK	4.44527	14.5848	19.0301	1.71413	4.47935	5e-05	0.0012271	yes
ENSDARG00000005139	hhatlb	24:20414589-20427751	wt	mut	OK	0.175305	0.937548	1.11285	2.41903	3.27672	0.0001	0.00224065	yes
ENSDARG00000005284	fbxl15	12:45500291-45507532	wt	mut	OK	2.21004	0.927238	3.13728	-1.25306	-2.55686	5e-05	0.0012271	yes
ENSDARG00000005332	lipib	24:23941316-23955958	wt	mut	OK	0.368456	0.970281	1.33874	1.39691	1.84353	0.00515	0.0492806	yes
ENSDARG00000005356	tyro3	17:10345612-10397504	wt	mut	OK	5.40727	3.53724	8.94451	-0.612279	-2.05496	0.00075	0.0116365	yes
ENSDARG00000085497	RNaseP_nuc	2:42737319-42737617	wt	mut	OK	4477.99	14461.7	18939.7	1.69131	7.87257	5e-05	0.0012271	yes
ENSDARG00000098709	Metazoa_SRP	11:11462067-11462364	wt	mut	OK	4416.9	13670	18086.9	1.6299	7.67587	5e-05	0.0012271	yes
ENSDARG00000053570	si:rp71-46j2.6	14:32433357-32449274	wt	mut	OK	2.97421	9.13804	12.1122	1.61938	3.12611	5e-05	0.0012271	yes
ENSDARG00000036189	spata4	14:36053539-36057562	wt	mut	OK	2.71203	8.28264	10.9947	1.61072	3.6609	5e-05	0.0012271	yes
ENSDARG00000094093	si:dkeyp-74b4.3	25:28716899-28752870	wt	mut	OK	7.15867	21.0851	28.2438	1.55846	3.33467	5e-05	0.0012271	yes
ENSDARG00000006110	chd	15:46557483-46594812	wt	mut	OK	2.32133	3.76737	6.0887	0.698604	2.16668	0.0003	0.00565055	yes
ENSDARG00000006112	myof	12:10479629-10529345	wt	mut	OK	5.28185	3.46263	8.74448	-0.609177	-2.39447	5e-05	0.0012271	yes
ENSDARG00000089936	sepw2b	3:19954005-19956493	wt	mut	OK	2.55722	7.50573	10.063	1.55342	3.39929	5e-05	0.0012271	yes
ENSDARG00000007383	kcnk6	18:46173085-46210563	wt	mut	OK	2.69235	7.72118	10.4135	1.51996	5.27545	5e-05	0.0012271	yes
ENSDARG00000006307	shisa4	11:24640203-24650979	wt	mut	OK	6.91099	2.2568	9.16779	-1.61461	-4.67396	5e-05	0.0012271	yes
ENSDARG00000006491	agpat9l	5:8415059-8452430	wt	mut	OK	1.35885	0.73002	2.08887	-0.896382	-1.78819	0.00345	0.0368791	yes
ENSDARG00000100920	Metazoa_SRP	11:11466533-11466821	wt	mut	OK	90.2597	254.862	345.122	1.49757	4.78477	5e-05	0.0012271	yes
ENSDARG00000098921	U3	20:3309887-3310104	wt	mut	OK	24.7703	68.5193	93.2896	1.4679	2.10901	0.00225	0.0267534	yes
ENSDARG00000104960	si:ch211-11n16.3	15:14310145-14312090	wt	mut	OK	4.42794	12.1543	16.5822	1.45675	4.10881	5e-05	0.0012271	yes
ENSDARG00000022525	mchr1b	3:25377689-25378754	wt	mut	OK	7.68182	21.0194	28.7012	1.4522	4.44451	5e-05	0.0012271	yes
ENSDARG00000104397	BX927287.3	4:45277996-45528822	wt	mut	OK	2.91367	7.93813	10.8518	1.44596	2.36644	5e-05	0.0012271	yes
ENSDARG00000032976	cmlc1	5:63486420-63487216	wt	mut	OK	3.87395	10.4946	14.3685	1.43776	3.13308	5e-05	0.0012271	yes
ENSDARG00000006747	tmem178b	4:12112304-12240311	wt	mut	OK	0.791774	0.459262	1.25104	-0.785771	-2.15367	0.00035	0.00635637	yes
ENSDARG00000006775	cass4	11:27498443-27531657	wt	mut	OK	2.57337	1.44766	4.02103	-0.829942	-2.17723	0.00045	0.00770223	yes
ENSDARG00000006983	celf3b	16:1306496-1336651	wt	mut	OK	2.56783	4.9151	7.48293	0.936673	1.96115	0.0008	0.012247	yes
ENSDARG00000102181	Metazoa_SRP	11:11477184-11477481	wt	mut	OK	194.06	524.111	718.171	1.43337	5.60463	5e-05	0.0012271	yes
ENSDARG00000007040	tmigd1	21:39902436-39907732	wt	mut	OK	1.27081	2.64072	3.91153	1.05519	1.95188	0.00155	0.0201828	yes
ENSDARG00000007086	aqp10a	16:22373352-22378875	wt	mut	OK	1.05873	0.377726	1.43646	-1.48692	-1.77263	0.0014	0.0186807	yes
ENSDARG00000007149	nadl1.2	23:28656323-28755234	wt	mut	OK	0.866753	1.6073	2.47405	0.890943	2.23683	0.00035	0.00635637	yes
ENSDARG00000007302	sh3gl3b	25:19425002-19438380	wt	mut	OK	3.65965	6.24174	9.90139	0.770245	1.6759	0.0037	0.0388297	yes
ENSDARG00000053136	b2m	4:12794546-12796640	wt	mut	OK	3.50156	9.41168	12.9132	1.42646	3.08566	5e-05	0.0012271	yes
ENSDARG00000007349	dmrt1	5:44344663-44391191	wt	mut	OK	2.14121	0.407475	2.54868	-2.39365	-2.191	5e-05	0.0012271	yes
ENSDARG00000101200	zgc:112964	12:43922559-43939050	wt	mut	OK	7.17275	19.2315	26.4043	1.42287	4.89483	5e-05	0.0012271	yes
ENSDARG00000014239	esyt1b	6:52262926-52348652	wt	mut	OK	3.93693	10.293	14.2299	1.38653	2.93612	5e-05	0.0012271	yes
ENSDARG00000095615	si:dkeyp-86h10.3	16:20503551-20506327	wt	mut	OK	3.08937	8.01647	11.1058	1.37565	4.04684	5e-05	0.0012271	yes
ENSDARG00000052708	tnni1b	6:54796408-54816373	wt	mut	OK	3.68302	9.52343	13.2065	1.37059	3.17278	5e-05	0.0012271	yes
ENSDARG00000092120	si:ch211-222d3.3	3:16724600-16726458	wt	mut	OK	3.09757	7.91455	11.0121	1.35337	3.08551	5e-05	0.0012271	yes
ENSDARG00000023082	krt1-19d	19:5408166-5416298	wt	mut	OK	40.4265	103.231	143.657	1.3525	5.95788	5e-05	0.0012271	yes
ENSDARG00000052917	si:ch211-202f3.3	17:45430071-45663802	wt	mut	OK	5.42306	13.7863	19.2094	1.34606	2.77309	0.00015	0.00315604	yes
ENSDARG00000040251	ctsk	16:29558313-29567926	wt	mut	OK	4.63302	11.5572	16.1902	1.31877	4.1112	5e-05	0.0012271	yes
ENSDARG00000026726	anxa1a	5:24978027-24983172	wt	mut	OK	58.9441	146.216	205.16	1.31068	5.74985	5e-05	0.0012271	yes
ENSDARG00000070012	sesn2	19:43745517-43761860	wt	mut	OK	2.97182	7.27261	10.2444	1.29112	3.16103	5e-05	0.0012271	yes
ENSDARG00000097137	si:dkeyp-116a7.2	19:35781481-35782717	wt	mut	OK	5.13221	12.4643	17.5965	1.28015	3.68702	5e-05	0.0012271	yes
ENSDARG00000030786	mpi	25:2909570-2932834	wt	mut	OK	4.11014	9.89406	14.0042	1.26738	3.42048	5e-05	0.0012271	yes
ENSDARG00000071629	BX511034.1	22:7511515-7533751	wt	mut	OK	3.16256	7.60205	10.7646	1.26529	3.83538	5e-05	0.0012271	yes
ENSDARG00000007885	fancl	13:26573446-26668794	wt	mut	OK	4.24263	10.1935	14.4361	1.26462	2.21129	0.00025	0.0048518	yes
ENSDARG00000098168	Metazoa_SRP	11:11431891-11432188	wt	mut	OK	3358.48	8067.2	11425.7	1.26426	6.08503	5e-05	0.0012271	yes
ENSDARG00000070429	C14orf1	17:51845267-51848922	wt	mut	OK	6.03691	14.4696	20.5065	1.26114	3.08138	5e-05	0.0012271	yes
ENSDARG00000090820	slc2a10	11:2344818-2369112	wt	mut	OK	3.1629	7.55583	10.7187	1.25634	3.43605	5e-05	0.0012271	yes
ENSDARG00000100095	anxa1b	5:64333289-64374434	wt	mut	OK	29.0959	69.3123	98.4082	1.2523	2.31667	0.0032	0.0348326	yes
ENSDARG00000088141	CU570684.4	3:58785149-58790211	wt	mut	OK	12.8921	30.3041	43.1962	1.23302	5.17647	5e-05	0.0012271	yes
ENSDARG00000008396	ftr24	2:47984268-48069643	wt	mut	OK	5.61984	12.9194	18.5392	1.20094	3.53004	5e-05	0.0012271	yes
ENSDARG00000101166	si:ch211-128n12.4	7:43127399-43136296	wt	mut	OK	122.377	279.091	401.468	1.1894	3.94839	5e-05	0.0012271	yes
ENSDARG00000042990	cyp2p10	20:25687144-25694517	wt	mut	OK	4.05143	9.22449	13.2759	1.18704	3.56905	5e-05	0.0012271	yes
ENSDARG00000009014	col11a1b	2:15720602-15894604	wt	mut	OK	2.99783	4.3128	7.31063	0.524705	2.13264	0.0002	0.00399838	yes
ENSDARG00000009018	rhbg	16:29331172-29342541	wt	mut	OK	1.49192	2.87023	4.36215	0.943992	2.67068	5e-05	0.0012271	yes
ENSDARG00000093713	si:dkey-256i11.2	4:44506971-45111228	wt	mut	OK	3.41146	7.65967	11.0711	1.16689	1.77327	0.0047	0.0463102	yes
ENSDARG00000091697	Metazoa_SRP	11:11397282-11397583	wt	mut	OK	1119.48	2513.25	3632.73	1.16673	5.54785	5e-05	0.0012271	yes
ENSDARG00000090160	si:dkey-156k2.3	4:48010068-48138012	wt	mut	OK	9.72017	21.6961	31.4163	1.15838	4.40626	5e-05	0.0012271	yes
ENSDARG00000058094	ciarta	19:9009508-9021143	wt	mut	OK	5.71383	12.5465	18.2603	1.13476	4.23482	5e-05	0.0012271	yes
ENSDARG00000001804	zgc:112148	3:56793585-56803804	wt	mut	OK	5.43241	11.8933	17.3257	1.13049	2.84721	5e-05	0.0012271	yes
ENSDARG00000009401	vcanb	10:43360297-43434580	wt	mut	OK	0.425074	1.01254	1.43761	1.25219	2.83989	5e-05	0.0012271	yes
ENSDARG00000020610	tnnt2a	23:5719251-5751200	wt	mut	OK	3.61654	7.90688	11.5234	1.1285	2.60943	5e-05	0.0012271	yes
ENSDARG00000098875	Metazoa_SRP	11:12203684-12203981	wt	mut	OK	17889.7	39112	57001.7	1.12848	4.77215	5e-05	0.0012271	yes
ENSDARG00000009637	rcvrn3	19:10420612-10433654	wt	mut	OK	3.41427	1.20671	4.62098	-1.5005	-1.73908	0.0019	0.0236342	yes
ENSDARG00000019950	carf	9:13258381-13280124	wt	mut	OK	12.4893	26.9944	39.4837	1.11196	3.11704	5e-05	0.0012271	yes
ENSDARG00000094557	nupr1	3:15355474-15356358	wt	mut	OK	5.67847	12.255	17.9335	1.10979	2.65626	5e-05	0.0012271	yes
ENSDARG00000010047	neu3.2	21:21760026-21762656	wt	mut	OK	1.04904	3.7532	4.80224	1.83905	3.70053	5e-05	0.0012271	yes
ENSDARG00000098569	si:ch211-215p11.4	4:45240668-45241839	wt	mut	OK	4.8824	10.4926	15.375	1.10371	2.84535	5e-05	0.0012271	yes
ENSDARG00000010145	tor4aa	10:3323408-3332058	wt	mut	OK	5.69512	2.73706	8.43218	-1.0571	-2.86924	5e-05	0.0012271	yes
ENSDARG00000058734	prdx1	2:6194608-6203806	wt	mut	OK	24.8041	53.0771	77.8812	1.09751	4.25579	5e-05	0.0012271	yes
ENSDARG00000097750	si:dkey-181d19.6	16:42993823-43029574	wt	mut	OK	16.9491	36.2516	53.2007	1.09684	1.8368	0.0042	0.042525	yes
ENSDARG00000093612	si:dkey-92i17.2	14:10301431-10311979	wt	mut	OK	19.0359	40.612	59.6479	1.09318	4.33972	5e-05	0.0012271	yes
ENSDARG00000010276	ptgs2b	20:34218938-34224536	wt	mut	OK	1.02237	2.08479	3.10716	1.02799	2.32984	0.00015	0.00315604	yes
ENSDARG00000094941	si:dkey-149i7.2	24:11993709-12113193	wt	mut	OK	12.0393	25.6488	37.6881	1.09114	1.75996	0.0026	0.0298455	yes
ENSDARG00000010477	p2rx3a	14:21637085-21662467	wt	mut	OK	3.82164	6.02958	9.85122	0.657867	2.08179	0.00045	0.00770223	yes
ENSDARG00000010680	gngt2a	3:22962213-22965593	wt	mut	OK	5.27592	2.35018	7.6261	-1.16665	-1.95271	0.0016	0.0207088	yes
ENSDARG00000057630	galm	13:7974375-7986193	wt	mut	OK	12.5477	26.4672	39.0149	1.07678	4.09263	5e-05	0.0012271	yes
ENSDARG00000010767	epha4l	15:41944440-42081796	wt	mut	OK	1.62723	2.24993	3.87716	0.467466	1.63803	0.00445	0.0445336	yes
ENSDARG00000079860	ppp1r16b	6:59375375-59390160	wt	mut	OK	6.26365	13.0883	19.352	1.0632	3.56484	5e-05	0.0012271	yes
ENSDARG00000099839	si:ch211-9d9.1	2:52144334-52164348	wt	mut	OK	6.61988	13.7422	20.3621	1.05374	2.57801	5e-05	0.0012271	yes
ENSDARG00000102074	CR388416.1	4:60980750-61059187	wt	mut	OK	5.7658	11.9329	17.6987	1.04935	3.05163	5e-05	0.0012271	yes
ENSDARG00000011122	pptc7a	8:4311827-4345475	wt	mut	OK	2.85004	1.97903	4.82907	-0.526191	-1.71121	0.00345	0.0368791	yes
ENSDARG00000091801	serpinb14	16:51378010-51434918	wt	mut	OK	17.2382	35.656	52.8942	1.04853	3.69191	5e-05	0.0012271	yes
ENSDARG00000011208	COX5B (1 of many)	8:52419833-52426519	wt	mut	OK	1.01039	0.383581	1.39397	-1.39732	-2.37102	0.0004	0.00703486	yes
ENSDARG00000104136	CR450780.5	4:60131648-60320535	wt	mut	OK	11.5287	23.7382	35.2669	1.04198	3.42402	5e-05	0.0012271	yes
ENSDARG00000077169	si:ch211-153b23.4	14:11144483-11150710	wt	mut	OK	3.43754	7.07523	10.5128	1.0414	3.53599	5e-05	0.0012271	yes
ENSDARG00000009594	nr1d2b	19:17941697-17948550	wt	mut	OK	3.84718	7.86597	11.7131	1.03182	2.97891	5e-05	0.0012271	yes
ENSDARG00000101682	si:dkey-146c18.6	4:60104620-60119868	wt	mut	OK	4.21503	8.61739	12.8324	1.03171	2.55124	5e-05	0.0012271	yes
ENSDARG00000011671	pde6b	21:20319821-20339971	wt	mut	OK	1.74685	0.798789	2.54564	-1.12887	-3.08216	5e-05	0.0012271	yes
ENSDARG00000098582	znf1040	4:45818006-46105351	wt	mut	OK	4.64319	9.42993	14.0731	1.02213	2.04579	0.0014	0.0186807	yes
ENSDARG00000011819	pcnx	13:35928105-36008633	wt	mut	OK	4.66966	3.36918	8.03884	-0.470918	-1.91594	0.00075	0.0116365	yes
ENSDARG00000053858	crip1	17:37438225-37447911	wt	mut	OK	5.28851	10.7094	15.9979	1.01794	2.09691	0.0008	0.012247	yes
ENSDARG00000004687	acaa1	24:20180892-20225192	wt	mut	OK	3.62955	7.32289	10.9524	1.01262	2.86507	5e-05	0.0012271	yes
ENSDARG00000028098	fut9d	8:13465671-13467781	wt	mut	OK	10.2849	20.6007	30.8856	1.00217	3.83245	5e-05	0.0012271	yes
ENSDARG00000012403	ercc6l2	8:29885211-29921589	wt	mut	OK	6.05859	3.80891	9.8675	-0.669604	-2.46518	5e-05	0.0012271	yes
ENSDARG00000012499	per1b	7:50547394-50571221	wt	mut	OK	1.90255	4.7132	6.61575	1.30877	4.8034	5e-05	0.0012271	yes
ENSDARG00000012776	smarca1	5:21348913-21384568	wt	mut	OK	2.33484	1.03559	3.37043	-1.17287	-1.58334	0.00285	0.03195	yes
ENSDARG00000012823	dlgap4b	6:1695835-1741322	wt	mut	OK	2.95944	1.57827	4.53771	-0.906976	-1.84207	0.00105	0.0150587	yes
ENSDARG00000012829	asah2	12:6084097-6109089	wt	mut	OK	0.85265	0.395846	1.2485	-1.10702	-1.87954	0.0029	0.0323424	yes
ENSDARG00000045262	gsnb	5:62595207-62626111	wt	mut	OK	10.3329	20.6358	30.9687	0.997906	1.70491	0.00465	0.0460014	yes
ENSDARG00000053646	adrb3a	8:37667754-37706317	wt	mut	OK	3.75362	7.43217	11.1858	0.985502	3.04466	5e-05	0.0012271	yes
ENSDARG00000099641	znf569l	4:53520405-53528844	wt	mut	OK	7.78449	15.4086	23.1931	0.985064	3.26016	5e-05	0.0012271	yes
ENSDARG00000013203	RAC1 (1 of many)	1:56228404-56233607	wt	mut	OK	2.41456	0.371573	2.78613	-2.70004	-2.44906	0.00155	0.0201828	yes
ENSDARG00000013236	dhcr24	20:7159220-7186931	wt	mut	OK	1.96497	1.14501	3.10998	-0.779149	-1.5705	0.005	0.0482736	yes
ENSDARG00000013295	slc2a3a	19:9766282-9793605	wt	mut	OK	5.44362	2.39528	7.8389	-1.18437	-3.86795	5e-05	0.0012271	yes
ENSDARG00000103337	rrp1	9:188605-197253	wt	mut	OK	13.3331	26.3779	39.711	0.984316	4.09137	5e-05	0.0012271	yes
ENSDARG00000013726	ap4b1	23:341624-354900	wt	mut	OK	5.10481	3.45858	8.56339	-0.561676	-1.70796	0.00285	0.03195	yes
ENSDARG00000014101	pyroxd2	13:40158832-40190475	wt	mut	OK	11.4345	22.6016	34.0361	0.983028	2.01769	0.00355	0.0377376	yes
ENSDARG00000057598	s100b	22:13822358-13826520	wt	mut	OK	3.63847	7.1915	10.83	0.982961	2.53516	5e-05	0.0012271	yes
ENSDARG00000013880	spata20	12:27498246-27574231	wt	mut	OK	1.34314	0.722589	2.06573	-0.89436	-1.90177	0.00235	0.0276566	yes
ENSDARG00000013928	plekhb2	22:16406133-16416929	wt	mut	OK	3.8438	1.67335	5.51715	-1.19979	-3.29932	5e-05	0.0012271	yes
ENSDARG00000018423	sulf2a	11:24669852-24755609	wt	mut	OK	17.9058	35.3838	53.2896	0.982665	2.05205	0.0006	0.00968363	yes
ENSDARG00000089507	ugt1b5	11:30048397-30082831	wt	mut	OK	4.50617	8.89598	13.4021	0.98125	2.44533	0.0001	0.00224065	yes
ENSDARG00000014039	si:dkeyp-93d12.1	20:42640657-42664630	wt	mut	OK	1.47331	3.56454	5.03785	1.27465	1.3403	0.00135	0.0182536	yes
ENSDARG00000096579	si:dkey-9c18.3	1:54798350-54799484	wt	mut	OK	8.22392	16.205	24.4289	0.978538	2.38446	0.00015	0.00315604	yes
ENSDARG00000063663	clp1	14:49994478-50010874	wt	mut	OK	3.70912	7.29451	11.0036	0.975732	3.6612	5e-05	0.0012271	yes
ENSDARG00000014273	camk2d2	1:13475959-13547582	wt	mut	OK	0.3654	0.805071	1.17047	1.13964	1.82076	0.0029	0.0323424	yes
ENSDARG00000014302	brinp2	2:34397564-34572688	wt	mut	OK	2.41612	1.30123	3.71735	-0.89282	-2.32938	0.00015	0.00315604	yes
ENSDARG00000021853	ntpcr	13:48456582-48465216	wt	mut	OK	3.90329	7.67309	11.5764	0.975115	2.10683	0.00095	0.0139255	yes
ENSDARG00000014490	tac1	19:26065402-26068962	wt	mut	OK	0.782517	2.46635	3.24887	1.65619	2.36859	0.00075	0.0116365	yes
ENSDARG00000101427	Metazoa_SRP	11:11451825-11452122	wt	mut	OK	9783.06	19190.1	28973.2	0.972005	4.4709	5e-05	0.0012271	yes
ENSDARG00000096172	znf1113	4:46987301-47011043	wt	mut	OK	3.70814	7.20899	10.9171	0.959102	2.68197	5e-05	0.0012271	yes
ENSDARG00000014554	ppp1r3cb	12:16232501-16239475	wt	mut	OK	2.24264	4.46383	6.70647	0.993081	1.58748	0.00395	0.0408569	yes
ENSDARG00000014651	svilb	2:49083727-49092477	wt	mut	OK	3.32827	1.09568	4.42395	-1.60295	-1.8929	0.0047	0.0463102	yes
ENSDARG00000014652	ankrd13b	15:28549985-28606774	wt	mut	OK	0.848914	1.62323	2.47214	0.935176	2.05994	0.00065	0.0102791	yes
ENSDARG00000074635	abca1a	1:51925840-51993670	wt	mut	OK	4.6374	9.01175	13.6491	0.958493	2.17759	0.0001	0.00224065	yes
ENSDARG00000026759	ldlrb	6:84454-91590	wt	mut	OK	5.50996	10.6488	16.1588	0.950572	3.12365	5e-05	0.0012271	yes
ENSDARG00000036291	nucb2b	18:38210337-38235576	wt	mut	OK	4.7227	9.09317	13.8159	0.945171	2.46545	0.0002	0.00399838	yes
ENSDARG00000014976	lims2	9:116314-122190	wt	mut	OK	1.65309	0.524527	2.17762	-1.65608	-2.13806	0.0006	0.00968363	yes
ENSDARG00000061231	tinagl1	19:42183995-42244582	wt	mut	OK	7.81385	14.9912	22.8051	0.940011	3.35578	5e-05	0.0012271	yes
ENSDARG00000015076	cx44.1	1:46754799-46757618	wt	mut	OK	2.52054	1.26473	3.78527	-0.994895	-2.32508	5e-05	0.0012271	yes
ENSDARG00000015134	camkk1b	15:15378106-15395479	wt	mut	OK	0.464199	1.58331	2.04751	1.77013	2.96072	5e-05	0.0012271	yes
ENSDARG00000093550	si:dkey-3e9.2	9:36309774-36311341	wt	mut	OK	9.17974	17.5901	26.7698	0.938236	1.86531	0.0019	0.0236342	yes
ENSDARG00000058323	tmbim1	6:12761179-12787308	wt	mut	OK	5.62401	10.7374	16.3614	0.93297	2.95317	5e-05	0.0012271	yes
ENSDARG00000043554	mrpl40	8:2471521-2477283	wt	mut	OK	7.80346	14.8946	22.6981	0.932599	2.65791	5e-05	0.0012271	yes
ENSDARG00000094653	si:dkey-149m13.5	4:57601472-57609592	wt	mut	OK	4.01739	7.61527	11.6327	0.922635	2.65544	5e-05	0.0012271	yes
ENSDARG00000087837	FO834877.1	4:42228512-42240454	wt	mut	OK	5.37653	10.1892	15.5657	0.922287	3.35373	5e-05	0.0012271	yes
ENSDARG00000031664	sox21a	6:7257045-7258174	wt	mut	OK	34.9933	66.0136	101.007	0.915686	3.88841	5e-05	0.0012271	yes
ENSDARG00000100104	zgc:101785	19:48631352-48649007	wt	mut	OK	4.66798	8.74528	13.4133	0.905706	2.40737	0.00015	0.00315604	yes
ENSDARG00000038995	tsnax	13:48862683-48878999	wt	mut	OK	8.37153	15.6781	24.0496	0.905189	3.45987	5e-05	0.0012271	yes
ENSDARG00000098387	tmem176l.3a	16:46629489-46653251	wt	mut	OK	4.02856	7.54012	11.5687	0.904324	3.47201	5e-05	0.0012271	yes
ENSDARG00000015876	npas1	15:8448639-8541484	wt	mut	OK	0.710063	1.2796	1.98966	0.84967	2.14607	0.00035	0.00635637	yes
ENSDARG00000015879	pax8	5:71633657-71643280	wt	mut	OK	5.42872	1.88059	7.30931	-1.52943	-4.23479	5e-05	0.0012271	yes
ENSDARG00000052693	si:dkey-172m14.1	5:48367664-48377451	wt	mut	OK	3.57939	6.69871	10.2781	0.904168	2.6009	5e-05	0.0012271	yes
ENSDARG00000099640	eed	1:27689-34330	wt	mut	OK	51.1426	95.6659	146.808	0.90348	2.90269	5e-05	0.0012271	yes
ENSDARG00000098540	ZC3H7B (1 of many)	3:4548099-4590736	wt	mut	OK	5.85908	10.9464	16.8055	0.901716	3.66076	5e-05	0.0012271	yes
ENSDARG00000016474	galcb	17:18869800-18878279	wt	mut	OK	4.44335	8.29217	12.7355	0.900101	3.00818	5e-05	0.0012271	yes
ENSDARG00000070480	agr2	19:30814137-30816783	wt	mut	OK	33.102	61.6634	94.7654	0.897495	3.72814	5e-05	0.0012271	yes
ENSDARG00000016141	slc6a2	7:35076998-35108709	wt	mut	OK	0.654249	1.23931	1.89356	0.921626	2.32108	0.00015	0.00315604	yes
ENSDARG00000071336	mif	14:49956562-49982453	wt	mut	OK	33.075	61.3665	94.4415	0.891711	3.0498	5e-05	0.0012271	yes
ENSDARG00000023656	he1a	22:14026833-14090589	wt	mut	OK	597.353	1108.02	1705.37	0.891324	2.78416	5e-05	0.0012271	yes
ENSDARG00000016212	nup214	5:71099966-71186048	wt	mut	OK	5.66889	3.75524	9.42413	-0.594164	-1.89806	0.00125	0.0172117	yes
ENSDARG00000069476	spint2	15:20302695-20314784	wt	mut	OK	33.7437	62.4445	96.1882	0.887955	3.99151	5e-05	0.0012271	yes
ENSDARG00000016301	zgc:65894	1:55548091-55554617	wt	mut	OK	1.13644	2.33647	3.47291	1.0398	2.09388	0.0005	0.00833478	yes
ENSDARG00000016311	dock9b	6:12359127-12553681	wt	mut	OK	0.988781	1.72683	2.71561	0.804406	1.89037	0.00115	0.0161047	yes
ENSDARG00000089477	si:ch211-132g1.3	1:1723066-1780328	wt	mut	OK	5.07984	9.37674	14.4566	0.884302	2.17624	5e-05	0.0012271	yes
ENSDARG00000093405	casp6	3:32827710-32834164	wt	mut	OK	3.65945	6.74178	10.4012	0.881503	2.52654	5e-05	0.0012271	yes
ENSDARG00000042329	BCR (1 of many)	8:30491493-30586642	wt	mut	OK	6.79757	12.5191	19.3167	0.881045	3.7111	5e-05	0.0012271	yes
ENSDARG00000003845	chm	21:34652273-34759419	wt	mut	OK	6.01574	11.0557	17.0714	0.877977	3.24553	5e-05	0.0012271	yes
ENSDARG00000101510	cetn2	14:14356519-14360993	wt	mut	OK	5.04529	9.2337	14.279	0.871971	2.03074	0.0005	0.00833478	yes
ENSDARG00000016505	apbb1ip	24:6010699-6048893	wt	mut	OK	1.94126	0.970901	2.91216	-0.999595	-2.39905	0.0001	0.00224065	yes
ENSDARG00000104279	appa	1:622440-661520	wt	mut	OK	20.5748	37.6187	58.1935	0.870572	2.54254	5e-05	0.0012271	yes
ENSDARG00000033616	sepn1	17:24668936-24676797	wt	mut	OK	30.3485	54.7916	85.1401	0.85233	2.35655	5e-05	0.0012271	yes
ENSDARG00000016607	echdc2	20:16305496-16323662	wt	mut	OK	2.21686	0.965988	3.18285	-1.19844	-1.9481	0.00055	0.00903729	yes
ENSDARG00000003974	spoplb	11:33555376-33580480	wt	mut	OK	18.839	33.8985	52.7375	0.847501	3.60564	5e-05	0.0012271	yes
ENSDARG00000016718	mmp11b	21:15540562-15578825	wt	mut	OK	1.34571	2.7131	4.05881	1.01157	2.13825	0.0006	0.00968363	yes
ENSDARG00000086411	srsf10b	17:53312994-53332747	wt	mut	OK	25.4332	45.5766	71.0098	0.841581	3.0834	5e-05	0.0012271	yes
ENSDARG00000017121	mafba	23:3462555-3465717	wt	mut	OK	2.7052	4.03396	6.73916	0.576462	1.806	0.00215	0.025958	yes
ENSDARG00000100582	si:ch211-195b11.3	14:38445943-38451570	wt	mut	OK	80.8968	144.913	225.81	0.841032	3.71149	5e-05	0.0012271	yes
ENSDARG00000017165	slc3a1	13:10516593-10540063	wt	mut	OK	1.48182	2.52052	4.00234	0.766354	2.15964	0.0002	0.00399838	yes
ENSDARG00000069796	znf1124	3:61967829-62093437	wt	mut	OK	11.094	19.8355	30.9295	0.8383	2.34945	0.0001	0.00224065	yes
ENSDARG00000017312	lmbrd2b	21:22364314-22386240	wt	mut	OK	3.26886	2.20191	5.47077	-0.570029	-1.77836	0.00175	0.0221517	yes
ENSDARG00000022832	bnip4	17:20211964-20216473	wt	mut	OK	17.779	31.7788	49.5578	0.83789	3.20951	5e-05	0.0012271	yes
ENSDARG00000103068	Metazoa_SRP	11:11478684-11478981	wt	mut	OK	1698.56	3033.24	4731.8	0.836547	4.0034	5e-05	0.0012271	yes
ENSDARG00000099082	BX005085.3	3:7247422-7248276	wt	mut	OK	4.66266	8.30751	12.9702	0.833263	1.92934	0.0021	0.0254612	yes
ENSDARG00000103515	vcana	5:45860894-45887050	wt	mut	OK	12.7344	22.6646	35.399	0.831712	2.4007	5e-05	0.0012271	yes
ENSDARG00000004930	lmo7a	9:22082880-22159226	wt	mut	OK	10.2049	18.1614	28.3663	0.831619	1.92707	0.0005	0.00833478	yes
ENSDARG00000103292	BX936303.3	4:52295741-52361891	wt	mut	OK	8.08664	14.3763	22.4629	0.830081	3.15336	5e-05	0.0012271	yes
ENSDARG00000017880	kcnip3b	10:20697349-20748879	wt	mut	OK	2.86361	5.74474	8.60835	1.00441	2.08927	0.0004	0.00703486	yes
ENSDARG00000102439	znf1149	4:57035020-57109220	wt	mut	OK	4.44819	7.86563	12.3138	0.822343	2.85137	5e-05	0.0012271	yes
ENSDARG00000040984	hspa13	15:29616238-29674152	wt	mut	OK	8.43649	14.8936	23.3301	0.819979	2.18236	0.0006	0.00968363	yes
ENSDARG00000071082	p4ha1b	17:20127566-20147370	wt	mut	OK	16.5993	29.2244	45.8237	0.816055	3.51838	5e-05	0.0012271	yes
ENSDARG00000079375	CU104698.1	9:10397381-10398559	wt	mut	OK	16.9891	29.8623	46.8514	0.813717	1.69055	0.00395	0.0408569	yes
ENSDARG00000018650	gtpbp3	11:6012921-6040504	wt	mut	OK	5.09818	2.26566	7.36384	-1.17005	-2.27841	0.0001	0.00224065	yes
ENSDARG00000041350	ankrd39	8:51586594-51592757	wt	mut	OK	8.7708	15.38	24.1508	0.810277	2.29548	5e-05	0.0012271	yes
ENSDARG00000018846	dgat2	10:32557415-32580360	wt	mut	OK	4.88311	1.52371	6.40682	-1.68022	-4.34063	5e-05	0.0012271	yes
ENSDARG00000018871	henmt1	20:33841185-33846295	wt	mut	OK	0.934694	3.0602	3.99489	1.71106	1.32211	0.0018	0.0226351	yes
ENSDARG00000004396	b3gnt5b	2:7951388-7959268	wt	mut	OK	14.4997	25.341	39.8407	0.805451	3.26433	5e-05	0.0012271	yes
ENSDARG00000074695	mertka	13:47334334-47400025	wt	mut	OK	7.51966	13.0565	20.5762	0.796029	2.2211	0.0003	0.00565055	yes
ENSDARG00000011240	ift46	10:29849559-29858607	wt	mut	OK	14.2397	24.7181	38.9578	0.795646	3.07181	5e-05	0.0012271	yes
ENSDARG00000019142	fam185a	25:18613852-18623346	wt	mut	OK	5.48757	1.93067	7.41824	-1.50706	-4.04217	5e-05	0.0012271	yes
ENSDARG00000019096	myl7	8:40417521-40425350	wt	mut	OK	8.37984	14.5309	22.9107	0.794129	1.71975	0.0045	0.0448001	yes
ENSDARG00000026531	alcama	10:28845123-28949177	wt	mut	OK	25.2525	43.7876	69.0401	0.794094	3.56815	5e-05	0.0012271	yes
ENSDARG00000038639	elovl6l	13:21536070-21541681	wt	mut	OK	5.54789	9.60404	15.1519	0.791703	2.29955	0.0001	0.00224065	yes
ENSDARG00000105629	si:dkey-165a24.7	7:22393778-22396440	wt	mut	OK	9.19205	15.8914	25.0834	0.789785	2.23379	5e-05	0.0012271	yes
ENSDARG00000098746	dhrs13l1	14:4044394-4056442	wt	mut	OK	4.47465	7.6877	12.1623	0.780778	2.17925	0.00025	0.0048518	yes
ENSDARG00000019747	hsd3b2	20:1251699-1255349	wt	mut	OK	1.67341	0.5871	2.26051	-1.51112	-2.01405	0.00035	0.00635637	yes
ENSDARG00000004748	zgc:100868	3:39331321-39346662	wt	mut	OK	11.4816	19.6887	31.1703	0.778045	3.24462	5e-05	0.0012271	yes
ENSDARG00000079283	si:ch211-247j9.1	21:32299379-32312091	wt	mut	OK	5.78735	9.92093	15.7083	0.777573	2.69071	5e-05	0.0012271	yes
ENSDARG00000037978	clec19a	3:31030448-31059886	wt	mut	OK	6.32817	10.8457	17.1739	0.777262	3.14392	5e-05	0.0012271	yes
ENSDARG00000020028	cps1	9:39217327-39328048	wt	mut	OK	1.25535	0.51973	1.77508	-1.27225	-3.01078	5e-05	0.0012271	yes
ENSDARG00000088232	SHISA2	24:21200888-21216525	wt	mut	OK	5.7155	9.78623	15.5017	0.775872	2.55659	5e-05	0.0012271	yes
ENSDARG00000020149	acoxl	13:47137466-47266622	wt	mut	OK	1.71096	4.58479	6.29575	1.42205	3.5073	5e-05	0.0012271	yes
ENSDARG00000020265	angptl6	3:54269624-54296045	wt	mut	OK	0.197275	1.39452	1.5918	2.82149	3.01336	5e-05	0.0012271	yes
ENSDARG00000002217	scocb	14:49944477-49951803	wt	mut	OK	11.9462	20.4203	32.3665	0.773452	3.34559	5e-05	0.0012271	yes
ENSDARG00000034457	si:ch211-163l21.7	8:23759765-23762394	wt	mut	OK	374.316	639.741	1014.06	0.773233	3.73388	5e-05	0.0012271	yes
ENSDARG00000020544	rem1	11:24076314-24093702	wt	mut	OK	0.498837	1.59137	2.09021	1.67363	2.06653	0.0003	0.00565055	yes
ENSDARG00000020602	grk7a	2:16867862-16875753	wt	mut	OK	0.344887	0.784763	1.12965	1.18613	2.06586	0.00105	0.0150587	yes
ENSDARG00000069150	rit1	19:24455606-24481299	wt	mut	OK	4.02154	6.85544	10.877	0.769503	1.9801	0.00055	0.00903729	yes
ENSDARG00000103158	CABZ01078098.1	11:43976546-44029701	wt	mut	OK	6.38768	10.8832	17.2709	0.768737	1.93474	0.0013	0.0177164	yes
ENSDARG00000079272	tmem14cb	24:36240789-36248321	wt	mut	OK	9.26571	15.73	24.9957	0.763541	2.20738	0.0001	0.00224065	yes
ENSDARG00000096876	si:dkey-61o18.2	11:37334119-37336776	wt	mut	OK	6.0767	10.3135	16.3902	0.763171	1.67893	0.0042	0.042525	yes
ENSDARG00000104629	SLC16A6 (1 of many)	12:20445507-20478504	wt	mut	OK	17.7415	30.0729	47.8144	0.761331	1.7627	0.0018	0.0226351	yes
ENSDARG00000045486	pawr	4:21602007-21745618	wt	mut	OK	7.69197	13.0169	20.7089	0.758958	2.78257	5e-05	0.0012271	yes
ENSDARG00000020872	nfat5a	25:36523586-36550446	wt	mut	OK	2.86644	1.939	4.80544	-0.563944	-1.87604	0.0013	0.0177164	yes
ENSDARG00000020901	gabrp	14:34207239-34216744	wt	mut	OK	0.979928	0.359498	1.33943	-1.44669	-1.87286	0.0049	0.047628	yes
ENSDARG00000038559	h1f0	24:37596940-37800501	wt	mut	OK	38.6484	65.3623	104.011	0.758049	1.83988	0.00255	0.0294479	yes
ENSDARG00000020984	slc16a10	20:133487-158943	wt	mut	OK	3.09	4.88636	7.97636	0.661154	1.97515	0.00095	0.0139255	yes
ENSDARG00000104864	klhdc2	17:135191-136900	wt	mut	OK	4.94222	8.35447	13.2967	0.757388	1.77956	0.0022	0.0263587	yes
ENSDARG00000021004	c5	5:62764793-62816203	wt	mut	OK	4.39624	2.66361	7.05985	-0.722889	-2.53865	5e-05	0.0012271	yes
ENSDARG00000094965	nfil3-5	6:7742071-7963434	wt	mut	OK	7.37767	12.4654	19.8431	0.756697	2.27594	0.0003	0.00565055	yes
ENSDARG00000100742	reep5	10:6494975-6516856	wt	mut	OK	12.461	20.8644	33.3254	0.743627	2.66116	5e-05	0.0012271	yes
ENSDARG00000021154	PRODH2	12:3889402-3904003	wt	mut	OK	1.84903	0.963406	2.81244	-0.940556	-2.12418	0.0004	0.00703486	yes
ENSDARG00000099755	pfklb	11:44869602-44895836	wt	mut	OK	5.62228	9.39721	15.0195	0.741078	3.04531	5e-05	0.0012271	yes
ENSDARG00000021233	pgls	3:52429892-52445947	wt	mut	OK	6.29594	3.35366	9.6496	-0.908682	-2.64614	5e-05	0.0012271	yes
ENSDARG00000021250	slc25a48	14:25293357-25301757	wt	mut	OK	4.41932	1.64196	6.06128	-1.42841	-2.6724	5e-05	0.0012271	yes
ENSDARG00000090462	mrpl20	22:19299-62124	wt	mut	OK	40.7724	67.8744	108.647	0.735275	2.55299	5e-05	0.0012271	yes
ENSDARG00000074393	sh3yl1	17:30574323-30635775	wt	mut	OK	9.20079	15.2707	24.4715	0.730935	1.87868	0.00125	0.0172117	yes
ENSDARG00000103542	vegfaa	16:4458252-4488590	wt	mut	OK	7.78037	12.9057	20.6861	0.730096	2.64462	5e-05	0.0012271	yes
ENSDARG00000070028	tmem41aa	9:12473290-12484318	wt	mut	OK	5.62016	9.30572	14.9259	0.727508	2.1993	0.00015	0.00315604	yes
ENSDARG00000099849	ebf1a	14:34673341-34910320	wt	mut	OK	9.59424	15.8752	25.4694	0.726538	2.13865	0.0002	0.00399838	yes
ENSDARG00000021480	olfml2bb	2:20946802-20957662	wt	mut	OK	1.55482	0.74961	2.30443	-1.05253	-2.12602	0.00035	0.00635637	yes
ENSDARG00000076082	CABZ01041962.1	5:6391511-6442550	wt	mut	OK	6.51111	10.7717	17.2828	0.726274	2.58195	5e-05	0.0012271	yes
ENSDARG00000021590	magi2a	4:23037942-23362010	wt	mut	OK	1.24833	0.715423	1.96375	-0.803129	-1.84294	0.00245	0.02858	yes
ENSDARG00000021611	si:dkey-151g10.3	23:25284411-25296132	wt	mut	OK	4.94887	3.05194	8.00081	-0.697373	-1.80238	0.00285	0.03195	yes
ENSDARG00000021688	mxa	1:6878882-6920301	wt	mut	OK	0.553058	1.30329	1.85635	1.23665	1.91466	0.0026	0.0298455	yes
ENSDARG00000062479	vcam1b	22:16144330-16154579	wt	mut	OK	4.19188	6.92708	11.119	0.724652	2.65386	5e-05	0.0012271	yes
ENSDARG00000104024	ccdc137	3:12741691-12752160	wt	mut	OK	13.6045	22.4772	36.0817	0.724372	2.90392	5e-05	0.0012271	yes
ENSDARG00000021924	hsp70.3	3:25950471-26026195	wt	mut	OK	2.99131	0.614352	3.60566	-2.28364	-3.4962	5e-05	0.0012271	yes
ENSDARG00000099175	hmgb1a	10:36082772-36087662	wt	mut	OK	176.714	291.63	468.344	0.72272	3.48882	5e-05	0.0012271	yes
ENSDARG00000007560	sema3bl	8:26502873-26554824	wt	mut	OK	7.0314	11.5748	18.6062	0.719108	2.79836	5e-05	0.0012271	yes
ENSDARG00000103015	zgc:110434	7:6327808-6328408	wt	mut	OK	369.909	606.366	976.275	0.713017	3.2716	5e-05	0.0012271	yes
ENSDARG00000063718	vps72	19:365826-372951	wt	mut	OK	14.1358	23.1538	37.2896	0.711893	3.09226	5e-05	0.0012271	yes
ENSDARG00000097799	zgc:194207	3:42042634-42049563	wt	mut	OK	15.0949	24.7119	39.8068	0.711141	2.40144	0.0001	0.00224065	yes
ENSDARG00000022614	ddx43	13:27202205-27223583	wt	mut	OK	5.32762	2.178	7.50562	-1.29048	-3.39088	5e-05	0.0012271	yes
ENSDARG00000022698	lad1	23:5753999-5785481	wt	mut	OK	1.89298	3.34148	5.23446	0.819829	2.04613	0.0004	0.00703486	yes
ENSDARG00000105258	cep72	16:52960839-52979004	wt	mut	OK	5.4326	8.88628	14.3189	0.709937	2.46061	5e-05	0.0012271	yes
ENSDARG00000071567	TSTD1	14:29429017-29433721	wt	mut	OK	20.379	33.2996	53.6786	0.708425	2.32132	5e-05	0.0012271	yes
ENSDARG00000045958	egfl6	9:54688228-54723923	wt	mut	OK	4.90367	7.99249	12.8962	0.704785	2.13928	0.0005	0.00833478	yes
ENSDARG00000023111	plg	20:42791377-42805774	wt	mut	OK	3.37427	1.35749	4.73176	-1.31364	-1.65533	0.0022	0.0263587	yes
ENSDARG00000023174	fez1	10:31794629-31838756	wt	mut	OK	2.41754	3.72162	6.13916	0.622391	1.66003	0.0047	0.0463102	yes
ENSDARG00000088711	lgals1l1	3:28808782-28829415	wt	mut	OK	7.06219	11.4798	18.542	0.700905	1.7669	0.0026	0.0298455	yes
ENSDARG00000014536	pfdn1	21:30079728-30123716	wt	mut	OK	55.6362	90.4337	146.07	0.700837	3.07862	5e-05	0.0012271	yes
ENSDARG00000060633	usp16	15:41333551-41353899	wt	mut	OK	11.1825	18.1731	29.3556	0.700556	2.00761	0.00145	0.0191553	yes
ENSDARG00000006640	eomesa	19:861016-875079	wt	mut	OK	4.08812	6.62659	10.7147	0.696828	2.295	0.0001	0.00224065	yes
ENSDARG00000023886	cacna2d4b	25:18925785-18992528	wt	mut	OK	0.85842	0.258414	1.11683	-1.732	-3.01495	5e-05	0.0012271	yes
ENSDARG00000068503	gbgt1l4	5:23264576-23301587	wt	mut	OK	35.4342	57.3918	92.826	0.6957	2.56702	5e-05	0.0012271	yes
ENSDARG00000024365	crlf1a	2:42027176-42071214	wt	mut	OK	3.72554	5.89748	9.62302	0.662648	1.72903	0.00265	0.0302985	yes
ENSDARG00000076966	pagr1	12:3686885-3695213	wt	mut	OK	15.0952	24.4478	39.543	0.695616	2.52886	5e-05	0.0012271	yes
ENSDARG00000024789	mxc	9:32994775-33007893	wt	mut	OK	0.299517	0.773553	1.07307	1.36886	2.03609	0.00095	0.0139255	yes
ENSDARG00000103442	si:ch211-193l2.3	11:41430443-41432228	wt	mut	OK	61.069	98.8465	159.916	0.694749	3.2427	5e-05	0.0012271	yes
ENSDARG00000104028	si:dkey-74k8.3	14:20755258-20766954	wt	mut	OK	57.8868	93.6921	151.579	0.694692	2.99103	5e-05	0.0012271	yes
ENSDARG00000104071	HIKESHI	1:36551-39191	wt	mut	OK	24.5786	39.7339	64.3125	0.692971	2.72235	5e-05	0.0012271	yes
ENSDARG00000034504	lmo1	7:27776085-27918488	wt	mut	OK	5.89921	9.52485	15.4241	0.691175	1.97588	0.0008	0.012247	yes
ENSDARG00000077004	aldh1l1	6:20008588-20042102	wt	mut	OK	4.80374	7.7149	12.5186	0.683489	2.52261	5e-05	0.0012271	yes
ENSDARG00000101164	NANS (1 of many)	25:5162127-5172508	wt	mut	OK	20.2511	32.4547	52.7058	0.68043	2.8362	5e-05	0.0012271	yes
ENSDARG00000057437	apodb	24:26161320-26183680	wt	mut	OK	15.4814	24.7526	40.234	0.677041	2.33963	5e-05	0.0012271	yes
ENSDARG00000025671	grm6b	11:25396424-25442093	wt	mut	OK	0.866754	1.69796	2.56471	0.970107	2.38681	5e-05	0.0012271	yes
ENSDARG00000025679	comtb	11:25382275-25393826	wt	mut	OK	1.44399	0.505318	1.94931	-1.5148	-1.30254	0.0038	0.0396621	yes
ENSDARG00000025859	lmf2b	4:9477583-9501930	wt	mut	OK	6.27839	2.53092	8.80931	-1.31073	-3.95631	5e-05	0.0012271	yes
ENSDARG00000025904	tecrb	1:55074941-55099503	wt	mut	OK	2.66458	1.20073	3.86531	-1.15	-1.67305	0.0014	0.0186807	yes
ENSDARG00000026086	zgc:162324	6:46256937-46318645	wt	mut	OK	6.35955	0.0870088	6.44656	-6.19162	-2.46915	0.00345	0.0368791	yes
ENSDARG00000026149	slc46a1	15:28242761-28253653	wt	mut	OK	1.6653	3.71435	5.37965	1.15732	2.81736	5e-05	0.0012271	yes
ENSDARG00000009046	nphp1	17:22052500-22071305	wt	mut	OK	4.56138	7.28738	11.8488	0.67593	1.83955	0.00215	0.025958	yes
ENSDARG00000101726	si:ch211-93f2.1	25:29942633-29986550	wt	mut	OK	11.376	18.1719	29.5479	0.675717	2.80546	5e-05	0.0012271	yes
ENSDARG00000039185	nfyba	4:9054571-9182686	wt	mut	OK	120.542	192.257	312.799	0.673495	1.97264	0.0004	0.00703486	yes
ENSDARG00000099729	pcdh10a	1:12079550-12110610	wt	mut	OK	18.2218	28.9645	47.1863	0.668616	1.87109	0.0017	0.0216618	yes
ENSDARG00000011166	cahz	2:29493849-29501875	wt	mut	OK	6.26143	9.94362	16.205	0.667278	2.23759	0.00015	0.00315604	yes
ENSDARG00000104903	cdkn1cb	25:7345632-7346897	wt	mut	OK	8.22129	13.0224	21.2437	0.663554	2.06311	0.0005	0.00833478	yes
ENSDARG00000087784	si:dkeyp-110a12.4	17:7438177-7460380	wt	mut	OK	5.3688	8.49123	13.86	0.661374	1.96424	0.00065	0.0102791	yes
ENSDARG00000026820	gc3	5:37523479-37560880	wt	mut	OK	0.366724	1.17279	1.53951	1.67718	3.1732	5e-05	0.0012271	yes
ENSDARG00000068217	stx2b	8:44217954-44230779	wt	mut	OK	11.9479	18.8842	30.8321	0.660424	2.17273	0.00015	0.00315604	yes
ENSDARG00000026834	cdr2l	3:59659894-59690351	wt	mut	OK	1.86111	2.90596	4.76707	0.642853	1.5974	0.0049	0.047628	yes
ENSDARG00000089863	CCDC57	12:33260964-33291258	wt	mut	OK	5.92052	9.34554	15.2661	0.658553	2.59219	5e-05	0.0012271	yes
ENSDARG00000046132	dynlt3	11:29543451-29547134	wt	mut	OK	39.862	62.8529	102.715	0.656966	2.84116	5e-05	0.0012271	yes
ENSDARG00000026990	klhl6	2:36663884-36677660	wt	mut	OK	0.78782	0.274453	1.06227	-1.5213	-1.75972	0.00095	0.0139255	yes
ENSDARG00000027236	rs1a	11:29997171-30004914	wt	mut	OK	0.984829	0.160525	1.14535	-2.61707	-1.20545	0.00095	0.0139255	yes
ENSDARG00000027424	slc25a3a	4:16855996-16864488	wt	mut	OK	0.805233	1.84215	2.64738	1.19391	1.98652	0.0017	0.0216618	yes
ENSDARG00000036359	minal	10:37570-42845	wt	mut	OK	14.3366	22.5937	36.9303	0.656216	2.68228	5e-05	0.0012271	yes
ENSDARG00000027547	TPGS1	2:57764583-57776741	wt	mut	OK	1.43971	2.98615	4.42586	1.05251	1.8511	0.002	0.0245944	yes
ENSDARG00000027572	as3mt	1:30974099-30990307	wt	mut	OK	3.51804	1.57086	5.0889	-1.16322	-2.40051	0.0004	0.00703486	yes
ENSDARG00000027620	bco2l	5:25521239-25530374	wt	mut	OK	0.419295	1.17011	1.5894	1.48061	2.35863	0.00045	0.00770223	yes
ENSDARG00000104945	sncb	14:45619120-45653489	wt	mut	OK	4.10529	6.46542	10.5707	0.655257	1.77909	0.00285	0.03195	yes
ENSDARG00000006546	ak4	6:31365170-31377637	wt	mut	OK	4.62536	7.28036	11.9057	0.654443	1.64819	0.00385	0.0401354	yes
ENSDARG00000043431	b3gntl1	1:56632800-56649965	wt	mut	OK	5.35605	8.42731	13.7834	0.653902	1.91862	0.00095	0.0139255	yes
ENSDARG00000071860	nrn1a	24:2523716-2528911	wt	mut	OK	10.216	16.0668	26.2828	0.653248	1.77314	0.0028	0.0315741	yes
ENSDARG00000104431	slc1a3a	5:7606711-7666984	wt	mut	OK	77.1774	121.357	198.534	0.653001	3.12773	5e-05	0.0012271	yes
ENSDARG00000028541	si:ch211-121a2.4	20:7132152-7141316	wt	mut	OK	2.0255	3.8328	5.8583	0.920122	1.66142	0.0029	0.0323424	yes
ENSDARG00000036164	cars	7:31525086-31559894	wt	mut	OK	15.3615	24.1099	39.4714	0.650306	2.81949	5e-05	0.0012271	yes
ENSDARG00000028664	ahsa1a	20:27068063-27075091	wt	mut	OK	1.5654	3.71886	5.28426	1.24833	2.1759	0.00025	0.0048518	yes
ENSDARG00000092726	si:dkey-184p9.7	21:11410583-11413253	wt	mut	OK	10.9611	17.1913	28.1524	0.649292	2.10191	0.00035	0.00635637	yes
ENSDARG00000102163	CR361561.2	4:63982425-64010550	wt	mut	OK	6.47854	10.1573	16.6358	0.648778	2.34899	0.0001	0.00224065	yes
ENSDARG00000060338	trmt12	14:35074317-35082463	wt	mut	OK	5.9027	9.2358	15.1385	0.645861	1.96957	0.0012	0.0166562	yes
ENSDARG00000029051	gbe1a	10:23964325-24327137	wt	mut	OK	0.157752	1.59631	1.75406	3.33901	2.67677	0.00165	0.0211497	yes
ENSDARG00000058822	wnt3a	2:3259861-3317256	wt	mut	OK	5.24082	8.19604	13.4369	0.645133	1.77086	0.00175	0.0221517	yes
ENSDARG00000019213	CTBP1	14:20826621-20902284	wt	mut	OK	10.0587	15.7258	25.7845	0.644684	1.69097	0.0044	0.0442127	yes
ENSDARG00000029432	tph1a	25:8015127-8035938	wt	mut	OK	3.22358	1.45168	4.67526	-1.15094	-2.69122	5e-05	0.0012271	yes
ENSDARG00000074390	tmem176l.4	16:46684938-46697749	wt	mut	OK	16.1777	25.2802	41.4579	0.644003	2.40647	5e-05	0.0012271	yes
ENSDARG00000104706	U3	7:7545593-7545807	wt	mut	OK	11426.8	17848.6	29275.4	0.643394	2.90972	5e-05	0.0012271	yes
ENSDARG00000093165	si:dkey-16p6.2	4:42627798-42657746	wt	mut	OK	5.19507	8.11049	13.3056	0.642646	2.17375	0.0002	0.00399838	yes
ENSDARG00000029874	khk	17:12254121-12269109	wt	mut	OK	2.29198	4.49529	6.78727	0.971819	1.73855	0.00275	0.031112	yes
ENSDARG00000035333	mis18a	10:33644854-33650250	wt	mut	OK	12.8962	20.1246	33.0208	0.642011	2.32777	5e-05	0.0012271	yes
ENSDARG00000038476	si:dkeyp-68b7.7	2:57777902-57785674	wt	mut	OK	6.94316	10.8173	17.7605	0.639674	1.75403	0.00415	0.0422918	yes
ENSDARG00000089947	BX005085.1	3:7237872-7243215	wt	mut	OK	4.78583	7.45477	12.2406	0.639394	1.7207	0.00335	0.036214	yes
ENSDARG00000041137	dhrs13a.3	15:28073891-28152604	wt	mut	OK	6.64509	10.3145	16.9596	0.634317	2.02926	0.00035	0.00635637	yes
ENSDARG00000103163	tomm20a	13:49253749-49294783	wt	mut	OK	40.5909	62.9795	103.57	0.633727	2.74452	5e-05	0.0012271	yes
ENSDARG00000040045	cldn1	2:45474-48529	wt	mut	OK	27.0273	41.898	68.9253	0.632466	2.21787	0.00015	0.00315604	yes
ENSDARG00000030490	sptb	17:38619131-38651437	wt	mut	OK	0.600652	0.980257	1.58091	0.70663	1.83326	0.0014	0.0186807	yes
ENSDARG00000021564	VDAC3 (1 of many)	10:3299524-3317901	wt	mut	OK	3.99038	6.18082	10.1712	0.631274	1.6215	0.0045	0.0448001	yes
ENSDARG00000040350	rpp38	16:28657871-28659558	wt	mut	OK	7.32575	11.3304	18.6562	0.629156	2.09511	0.00035	0.00635637	yes
ENSDARG00000030614	syt1a	4:21408780-21594424	wt	mut	OK	1.83506	5.26545	7.10051	1.52073	3.64451	5e-05	0.0012271	yes
ENSDARG00000030633	plekhm3	9:28329438-28393622	wt	mut	OK	3.99927	2.54658	6.54585	-0.651173	-1.91974	0.00115	0.0161047	yes
ENSDARG00000104256	bco1	7:65037325-65066446	wt	mut	OK	5.81282	8.97431	14.7871	0.626564	1.86482	0.00115	0.0161047	yes
ENSDARG00000031915	hif1an	13:29822182-29849765	wt	mut	OK	18.5289	28.6035	47.1324	0.626412	2.54483	5e-05	0.0012271	yes
ENSDARG00000039980	ppt1	19:44145086-44176179	wt	mut	OK	17.3604	26.7707	44.1311	0.624853	2.19561	0.0001	0.00224065	yes
ENSDARG00000086416	med11	10:22921673-22946644	wt	mut	OK	44.8744	69.1314	114.006	0.623449	1.70116	0.00405	0.0414933	yes
ENSDARG00000030954	ftr56	19:12479015-12485062	wt	mut	OK	0.290195	0.841588	1.13178	1.53609	1.98221	0.00085	0.0128191	yes
ENSDARG00000031126	notum1a	3:57878416-57908864	wt	mut	OK	2.6952	4.9056	7.6008	0.864038	2.33654	5e-05	0.0012271	yes
ENSDARG00000004632	egln1b	11:31294945-31340632	wt	mut	OK	10.8335	16.6725	27.506	0.621975	2.19673	0.00035	0.00635637	yes
ENSDARG00000031299	dhrs11b	15:15467537-15472091	wt	mut	OK	1.59472	2.91207	4.50679	0.868743	1.8362	0.0031	0.0340231	yes
ENSDARG00000042962	dgcr2	10:42111604-42279757	wt	mut	OK	14.915	22.9226	37.8376	0.620006	2.08276	0.00045	0.00770223	yes
ENSDARG00000037895	ramp2	3:36694852-36704638	wt	mut	OK	6.07447	9.32885	15.4033	0.61894	2.06389	0.0005	0.00833478	yes
ENSDARG00000031533	ap5m1	17:44327272-44340257	wt	mut	OK	3.40177	1.67205	5.07382	-1.02467	-2.45782	0.00015	0.00315604	yes
ENSDARG00000102746	tmem39a	1:39312-44565	wt	mut	OK	11.6691	17.9153	29.5844	0.618499	1.76595	0.0038	0.0396621	yes
ENSDARG00000031678	col5a2a	9:42851400-42894621	wt	mut	OK	0.749177	1.33867	2.08785	0.837422	2.06758	0.00035	0.00635637	yes
ENSDARG00000031698	mylk2	23:32112854-32134352	wt	mut	OK	0.637732	1.0987	1.73643	0.784777	1.73087	0.00265	0.0302985	yes
ENSDARG00000031751	npr1a	19:26839366-27044894	wt	mut	OK	3.07056	4.36708	7.43764	0.508165	1.86566	0.00095	0.0139255	yes
ENSDARG00000023672	timm8a	14:38538167-38541504	wt	mut	OK	30.5076	46.8297	77.3373	0.618255	2.53026	0.0001	0.00224065	yes
ENSDARG00000031929	stard14	14:32930072-32937770	wt	mut	OK	2.63345	5.49835	8.1318	1.06205	2.95489	5e-05	0.0012271	yes
ENSDARG00000031954	rbck1	22:10115370-10135764	wt	mut	OK	4.15847	1.36484	5.52331	-1.60732	-1.42132	0.0036	0.0380348	yes
ENSDARG00000105507	si:ch1073-159d7.13	7:6329650-6330302	wt	mut	OK	83.2565	127.77	211.026	0.617911	2.64882	5e-05	0.0012271	yes
ENSDARG00000032157	grk6	21:36938285-37052289	wt	mut	OK	3.62912	5.96684	9.59596	0.717344	2.13103	0.0004	0.00703486	yes
ENSDARG00000023299	snu13b	12:10405941-10409335	wt	mut	OK	346.074	531.014	877.088	0.61767	2.97455	5e-05	0.0012271	yes
ENSDARG00000037815	b4galt5	23:4083718-4132847	wt	mut	OK	8.15652	12.4871	20.6436	0.614408	2.10481	0.00015	0.00315604	yes
ENSDARG00000032496	pon1	16:24731567-24741233	wt	mut	OK	1.46642	3.64317	5.10959	1.31289	3.83647	5e-05	0.0012271	yes
ENSDARG00000100103	U3	7:7538795-7539009	wt	mut	OK	3625.86	5549.42	9175.28	0.614013	2.48786	5e-05	0.0012271	yes
ENSDARG00000045929	oaz2a	25:6059420-6079041	wt	mut	OK	6.8666	10.508	17.3746	0.613817	1.6881	0.0009	0.0133859	yes
ENSDARG00000032584	thnsl2	5:71309873-71320710	wt	mut	OK	0.604177	1.82872	2.4329	1.59779	2.8931	5e-05	0.0012271	yes
ENSDARG00000029296	si:ch211-134n22.1	14:10797703-10962361	wt	mut	OK	4.76949	7.29807	12.0676	0.613681	2.56696	5e-05	0.0012271	yes
ENSDARG00000012016	hpgd	1:37679517-37695980	wt	mut	OK	4.45418	6.81416	11.2683	0.613378	1.62838	0.00465	0.0460014	yes
ENSDARG00000033020	ppcdc	18:18986472-18990454	wt	mut	OK	2.90128	5.57934	8.48062	0.943408	2.63524	0.0001	0.00224065	yes
ENSDARG00000033161	sst1.2	15:36257985-36262308	wt	mut	OK	2.04294	4.11947	6.16241	1.01181	1.98714	0.0014	0.0186807	yes
ENSDARG00000005023	fkbp9	19:42989705-43038014	wt	mut	OK	93.4349	142.858	236.293	0.612547	2.8458	5e-05	0.0012271	yes
ENSDARG00000033231	mcm6l	2:50465507-50491283	wt	mut	OK	1.68662	0.799763	2.48638	-1.07649	-1.76537	0.0007	0.0109792	yes
ENSDARG00000061357	CHST6	25:34357266-34365933	wt	mut	OK	5.54504	8.47327	14.0183	0.61172	1.82121	0.00205	0.0250132	yes
ENSDARG00000033444	map4k6	21:33999089-34040617	wt	mut	OK	1.26428	0.398693	1.66297	-1.66497	-3.2118	5e-05	0.0012271	yes
ENSDARG00000044655	st14b	21:25239085-25258482	wt	mut	OK	4.25467	6.50132	10.756	0.611688	2.12893	0.00025	0.0048518	yes
ENSDARG00000103785	sult2st2	12:642392-650599	wt	mut	OK	8.953	13.673	22.626	0.610892	1.86231	0.00185	0.0231458	yes
ENSDARG00000034011	GABRA2 (1 of many)	14:2969717-3094752	wt	mut	OK	1.49695	0.358697	1.85565	-2.06119	-2.69907	0.0006	0.00968363	yes
ENSDARG00000034086	zgc:65895	6:59762783-59767333	wt	mut	OK	1.99093	3.24914	5.24007	0.706615	1.64614	0.0048	0.0469203	yes
ENSDARG00000034173	prkcq	4:25402042-25454181	wt	mut	OK	0.496582	2.34006	2.83664	2.23644	5.22461	5e-05	0.0012271	yes
ENSDARG00000078854	tusc3	1:15441311-15527298	wt	mut	OK	20.2424	30.8663	51.1087	0.608652	2.0434	0.00015	0.00315604	yes
ENSDARG00000034207	si:dkey-91f15.8	6:18958699-18967649	wt	mut	OK	0.942703	0.360231	1.30293	-1.38788	-1.61651	0.00475	0.046643	yes
ENSDARG00000034300	sema3c	4:22892649-22931969	wt	mut	OK	0.682009	2.46354	3.14555	1.85287	3.70358	5e-05	0.0012271	yes
ENSDARG00000035095	tdgf1	10:1927729-1934212	wt	mut	OK	5.27082	8.03381	13.3046	0.608055	1.8292	0.00135	0.0182536	yes
ENSDARG00000028618	zgc:77517	6:39362840-39367931	wt	mut	OK	22.047	33.5046	55.5516	0.603776	2.53854	5e-05	0.0012271	yes
ENSDARG00000034559	srpx2	14:35102196-35121834	wt	mut	OK	2.84406	0.849416	3.69348	-1.74341	-3.50279	5e-05	0.0012271	yes
ENSDARG00000034650	fabp7b	20:40472146-40473626	wt	mut	OK	0.912	7.48285	8.39485	3.03648	4.15595	5e-05	0.0012271	yes
ENSDARG00000001578	echs1	13:24448657-24451786	wt	mut	OK	15.7677	23.9312	39.6989	0.60192	2.33917	5e-05	0.0012271	yes
ENSDARG00000003032	eif4a1b	5:23698822-23727339	wt	mut	OK	89.0285	135.097	224.125	0.601657	2.59231	5e-05	0.0012271	yes
ENSDARG00000038237	tbc1d12a	17:23216097-23233851	wt	mut	OK	10.6016	16.0851	26.6867	0.601446	2.45471	5e-05	0.0012271	yes
ENSDARG00000075730	dnph1	13:4089832-4095459	wt	mut	OK	16.5886	25.1416	41.7302	0.599887	1.82205	0.00145	0.0191553	yes
ENSDARG00000037410	med28	1:20616448-20619659	wt	mut	OK	31.9001	48.2834	80.1835	0.597966	2.29241	0.0001	0.00224065	yes
ENSDARG00000002264	mrpl41	5:24569093-24571379	wt	mut	OK	18.5911	28.0909	46.682	0.595492	1.84545	0.002	0.0245944	yes
ENSDARG00000040338	hvcn1	10:8443228-8454264	wt	mut	OK	9.4642	14.294	23.7582	0.594858	1.75244	0.00235	0.0276566	yes
ENSDARG00000058394	tagln3b	24:21772036-21778756	wt	mut	OK	4.64998	7.01937	11.6694	0.594116	1.71123	0.0039	0.0405831	yes
ENSDARG00000035256	eef2l2	5:40885123-40894678	wt	mut	OK	2.3098	1.08057	3.39037	-1.09598	-2.01829	0.0002	0.00399838	yes
ENSDARG00000009653	lhfpl2a	21:284298-308867	wt	mut	OK	9.35913	14.095	23.4541	0.590737	1.7416	0.00255	0.0294479	yes
ENSDARG00000045027	rab9a	9:55097172-55115376	wt	mut	OK	10.8615	16.3549	27.2164	0.590502	1.84902	0.0013	0.0177164	yes
ENSDARG00000021324	nsun4	2:10362663-10371613	wt	mut	OK	7.86317	11.8369	19.7001	0.590111	1.92324	0.00125	0.0172117	yes
ENSDARG00000075487	si:ch211-267e7.3	2:20881429-20941343	wt	mut	OK	8.27421	12.4339	20.7081	0.587585	2.44593	5e-05	0.0012271	yes
ENSDARG00000019917	epb41l3b	2:58027561-58111786	wt	mut	OK	7.03624	10.5565	17.5927	0.585257	1.82442	0.00175	0.0221517	yes
ENSDARG00000059257	rcvrnb	12:310186-314209	wt	mut	OK	5.3476	8.01871	13.3663	0.584479	1.7502	0.00305	0.0336026	yes
ENSDARG00000089885	slc16a12b	12:16845840-16865094	wt	mut	OK	4.75735	7.12773	11.8851	0.583283	1.93384	0.0011	0.0155943	yes
ENSDARG00000035649	ext1c	19:47719423-47744812	wt	mut	OK	2.35502	1.01251	3.36753	-1.2178	-2.07854	0.0011	0.0155943	yes
ENSDARG00000035797	si:dkey-17m8.2	16:18235422-18246297	wt	mut	OK	2.1509	0.74618	2.89708	-1.52735	-2.22854	0.00035	0.00635637	yes
ENSDARG00000075100	neo1b	25:2623428-2887019	wt	mut	OK	5.25808	7.87012	13.1282	0.581849	2.17784	5e-05	0.0012271	yes
ENSDARG00000068947	si:ch211-264e16.1	18:15735207-15750634	wt	mut	OK	4.68566	7.01042	11.6961	0.581248	2.09155	0.0004	0.00703486	yes
ENSDARG00000105400	si:ch73-368j24.14	7:6226173-6226643	wt	mut	OK	230.311	344.568	574.879	0.581205	2.6318	5e-05	0.0012271	yes
ENSDARG00000035942	hrh3	7:41468619-41473164	wt	mut	OK	1.14118	0.559726	1.70091	-1.02773	-1.97548	0.0011	0.0155943	yes
ENSDARG00000035985	fam210aa	19:12710885-12728880	wt	mut	OK	1.97719	3.10925	5.08644	0.65311	1.72282	0.0027	0.0307074	yes
ENSDARG00000071643	zgc:171490	22:6516850-6532772	wt	mut	OK	27.3328	40.8682	68.201	0.580342	2.44655	5e-05	0.0012271	yes
ENSDARG00000035273	tmtc2b	18:11747030-11940951	wt	mut	OK	4.2034	6.2836	10.487	0.580033	2.03837	0.00035	0.00635637	yes
ENSDARG00000007971	cks1b	19:7916099-7919307	wt	mut	OK	65.0181	97.1002	162.118	0.578634	2.56493	5e-05	0.0012271	yes
ENSDARG00000017255	tmed1b	1:58129873-58139681	wt	mut	OK	11.8101	17.5979	29.408	0.575383	1.8986	0.00105	0.0150587	yes
ENSDARG00000101722	larp1	21:45817904-45833739	wt	mut	OK	6.06013	9.02658	15.0867	0.574831	2.22956	0.0001	0.00224065	yes
ENSDARG00000078217	cblc	16:25846068-25885788	wt	mut	OK	4.93358	7.33359	12.2672	0.571883	1.88492	0.00115	0.0161047	yes
ENSDARG00000099273	zgc:103508	10:22948885-22956589	wt	mut	OK	25.3969	37.7441	63.141	0.571598	1.96385	0.00125	0.0172117	yes
ENSDARG00000036272	gcgrb	1:55675354-55693812	wt	mut	OK	1.9311	1.0526	2.9837	-0.875462	-1.76698	0.0024	0.0281108	yes
ENSDARG00000017799	tgm1	23:1721805-1739284	wt	mut	OK	7.06975	10.5066	17.5764	0.57157	2.16072	0.00015	0.00315604	yes
ENSDARG00000088717	ecrg4b	6:15141744-15173200	wt	mut	OK	45.7146	67.8925	113.607	0.570597	2.2479	0.00015	0.00315604	yes
ENSDARG00000036371	acta1a	1:53286190-53293789	wt	mut	OK	5.95506	3.67142	9.62648	-0.697779	-1.82206	0.0021	0.0254612	yes
ENSDARG00000069289	gabpa	9:35205327-35216332	wt	mut	OK	18.448	27.3885	45.8365	0.570111	2.11727	0.00015	0.00315604	yes
ENSDARG00000036587	cbr1	1:46474609-46482000	wt	mut	OK	1.55042	3.53656	5.08698	1.18969	3.55315	5e-05	0.0012271	yes
ENSDARG00000098992	zgc:114119	19:47918633-47923366	wt	mut	OK	16.4175	24.3673	40.7848	0.569713	2.08377	0.00045	0.00770223	yes
ENSDARG00000036816	pou2f2a	19:6294648-6384068	wt	mut	OK	2.5206	3.59127	6.11187	0.510726	1.72552	0.0013	0.0177164	yes
ENSDARG00000053463	poglut1	1:28071036-28085742	wt	mut	OK	28.1175	41.6267	69.7442	0.566045	2.34815	5e-05	0.0012271	yes
ENSDARG00000093759	gpr31	20:42807175-42845350	wt	mut	OK	8.82484	13.0645	21.8893	0.566008	1.72277	0.00325	0.0352878	yes
ENSDARG00000036840	krt15	11:11532156-11534848	wt	mut	OK	0.417712	2.44624	2.86395	2.54999	3.90823	5e-05	0.0012271	yes
ENSDARG00000099960	elovl1a	2:19503307-19566048	wt	mut	OK	10.6049	15.6905	26.2954	0.56516	2.06213	0.00045	0.00770223	yes
ENSDARG00000023542	cdh7	2:27354780-27439019	wt	mut	OK	14.4979	21.4461	35.944	0.564873	1.97859	0.00095	0.0139255	yes
ENSDARG00000063634	hpse	21:19311018-19324677	wt	mut	OK	7.14744	10.5692	17.7166	0.564369	1.94626	0.001	0.0144983	yes
ENSDARG00000037101	mtmr7a	14:30058231-30071827	wt	mut	OK	1.36563	2.37486	3.74049	0.798279	2.01924	0.0009	0.0133859	yes
ENSDARG00000037140	pfkfb1	23:26090685-26111428	wt	mut	OK	5.26091	3.36354	8.62445	-0.645331	-1.76942	0.00225	0.0267534	yes
ENSDARG00000077080	gprc5ba	3:62130672-62143516	wt	mut	OK	4.48619	6.61755	11.1037	0.560807	1.72453	0.00315	0.034375	yes
ENSDARG00000037192	zgc:113364	14:28224194-28228605	wt	mut	OK	3.88	0.235859	4.11586	-4.04006	-3.39833	0.0001	0.00224065	yes
ENSDARG00000098181	zgc:113184	11:2485459-2524794	wt	mut	OK	6.51502	9.60352	16.1185	0.559795	1.64282	0.0051	0.0489651	yes
ENSDARG00000037403	HSPA8 (1 of many)	15:19725765-19741779	wt	mut	OK	2.16312	0.958216	3.12134	-1.17469	-1.82824	0.00025	0.0048518	yes
ENSDARG00000063344	fam162a	24:20782715-20790247	wt	mut	OK	18.9864	27.9815	46.9679	0.559504	1.90256	0.0011	0.0155943	yes
ENSDARG00000037421	egr1	14:21035276-21039140	wt	mut	OK	0.498653	1.04269	1.54134	1.0642	2.03686	0.00115	0.0161047	yes
ENSDARG00000037455	ugt8	1:19863129-19914215	wt	mut	OK	4.06956	5.48672	9.55628	0.431071	1.65812	0.0036	0.0380348	yes
ENSDARG00000075977	prr5a	25:20977373-20994568	wt	mut	OK	9.54433	14.0651	23.6094	0.559401	1.97961	0.0004	0.00703486	yes
ENSDARG00000037496	gria4a	15:44475743-44790596	wt	mut	OK	0.918321	1.77208	2.6904	0.948371	1.64153	0.00515	0.0492806	yes
ENSDARG00000100823	selk	8:53493400-53561072	wt	mut	OK	75.157	110.749	185.906	0.559312	1.68748	0.00425	0.0429808	yes
ENSDARG00000037555	atoh8	14:9201276-9216350	wt	mut	OK	3.17913	4.77509	7.95422	0.586894	1.67716	0.00475	0.046643	yes
ENSDARG00000087421	serbp1b	2:2788235-2800194	wt	mut	OK	32.3824	47.7125	80.0949	0.559155	2.42331	5e-05	0.0012271	yes
ENSDARG00000037804	phlda3	23:5822469-5825270	wt	mut	OK	3.1958	6.19436	9.39016	0.954778	2.53372	0.0002	0.00399838	yes
ENSDARG00000041904	ankzf1	9:12863210-12914063	wt	mut	OK	9.60179	14.1417	23.7435	0.558581	1.74288	0.00185	0.0231458	yes
ENSDARG00000092900	si:ch211-279m15.1	20:31525939-31840938	wt	mut	OK	473.562	697.125	1170.69	0.557864	2.47253	5e-05	0.0012271	yes
ENSDARG00000037843	tor4aa	10:3030375-3038993	wt	mut	OK	0.140646	2.33037	2.47102	4.05042	3.96072	0.0004	0.00703486	yes
ENSDARG00000037883	prcp	15:11295850-11382679	wt	mut	OK	0.384978	0.897645	1.28262	1.22137	1.88236	0.00505	0.0486475	yes
ENSDARG00000008388	mmp14b	2:38178989-38201313	wt	mut	OK	13.6165	20.0398	33.6563	0.557508	2.53588	5e-05	0.0012271	yes
ENSDARG00000011555	spag7	5:67380961-67395630	wt	mut	OK	48.8057	71.7997	120.605	0.556928	1.92234	0.0009	0.0133859	yes
ENSDARG00000069503	cldnh	21:25702689-25704806	wt	mut	OK	50.2081	73.8381	124.046	0.556445	2.59503	5e-05	0.0012271	yes
ENSDARG00000087398	fbn2b	22:4210089-4264863	wt	mut	OK	15.5037	22.7841	38.2878	0.555415	1.89546	0.0008	0.012247	yes
ENSDARG00000100657	egfl7	21:7666974-7703748	wt	mut	OK	6.8651	10.0627	16.9278	0.551662	1.7116	0.0027	0.0307074	yes
ENSDARG00000100630	lye	19:17461685-17463682	wt	mut	OK	187.183	274.171	461.354	0.550627	2.46122	5e-05	0.0012271	yes
ENSDARG00000021916	vax1	17:21412856-21422488	wt	mut	OK	12.869	18.8394	31.7084	0.549857	2.30338	5e-05	0.0012271	yes
ENSDARG00000077499	plekho1b	16:38065317-38117920	wt	mut	OK	5.65965	8.27487	13.9345	0.548023	2.32617	5e-05	0.0012271	yes
ENSDARG00000102705	otud6b	19:34249318-34263099	wt	mut	OK	8.49783	12.4222	20.92	0.547755	1.64636	0.0036	0.0380348	yes
ENSDARG00000010789	homer3	11:13366456-13448000	wt	mut	OK	11.1867	16.339	27.5257	0.546536	2.38908	5e-05	0.0012271	yes
ENSDARG00000102356	scp2b	23:41935798-41959885	wt	mut	OK	9.89735	14.4474	24.3447	0.545695	1.68119	0.0044	0.0442127	yes
ENSDARG00000035198	gcnt4a	5:50379969-50383512	wt	mut	OK	13.0084	18.9876	31.996	0.54562	2.12581	0.0003	0.00565055	yes
ENSDARG00000021201	noto	13:14845115-14847112	wt	mut	OK	10.8261	15.7853	26.6114	0.54406	1.70768	0.00315	0.034375	yes
ENSDARG00000097765	si:ch211-198p11.6	3:39413903-39422641	wt	mut	OK	4.16327	6.0669	10.2302	0.543242	1.63167	0.00485	0.0472485	yes
ENSDARG00000001634	kirrela	7:18818196-18894659	wt	mut	OK	16.5551	24.1123	40.6674	0.542498	2.44629	0.0001	0.00224065	yes
ENSDARG00000038643	alas2	8:21321757-21340400	wt	mut	OK	2.67759	4.09025	6.76784	0.611253	1.64904	0.0051	0.0489651	yes
ENSDARG00000038703	hkdc1	13:22887047-22901353	wt	mut	OK	0.821179	1.70229	2.52347	1.0517	2.40601	5e-05	0.0012271	yes
ENSDARG00000038713	tep1	2:37914609-37978360	wt	mut	OK	3.39616	1.76528	5.16144	-0.944005	-2.28112	0.0013	0.0177164	yes
ENSDARG00000016484	dkc1	21:43706833-43721295	wt	mut	OK	82.7585	120.516	203.274	0.542246	2.59334	5e-05	0.0012271	yes
ENSDARG00000035564	dgcr8	5:24016636-24028586	wt	mut	OK	34.9336	50.8549	85.7885	0.541774	2.60249	5e-05	0.0012271	yes
ENSDARG00000038865	acox3	7:61453877-61495477	wt	mut	OK	1.27505	0.656703	1.93175	-0.957238	-2.08891	0.0009	0.0133859	yes
ENSDARG00000070704	thap7	19:24543321-24552010	wt	mut	OK	6.80327	9.89118	16.6944	0.539914	1.93134	0.00095	0.0139255	yes
ENSDARG00000019367	tgfb3	17:51987800-52020693	wt	mut	OK	7.61371	11.0663	18.68	0.539497	1.73039	0.0025	0.0290455	yes
ENSDARG00000099164	NACC1 (1 of many)	3:33613371-33627128	wt	mut	OK	7.92834	11.5168	19.4451	0.538654	2.3989	5e-05	0.0012271	yes
ENSDARG00000063711	trim3a	15:32439461-32525550	wt	mut	OK	4.11594	5.97887	10.0948	0.538652	2.02726	0.00015	0.00315604	yes
ENSDARG00000053558	rtkn2a	17:43605153-43632832	wt	mut	OK	17.7183	25.718	43.4363	0.537541	2.35357	5e-05	0.0012271	yes
ENSDARG00000035909	mfsd2ab	19:31280531-31296741	wt	mut	OK	15.6072	22.6439	38.2511	0.536914	2.27353	0.0002	0.00399838	yes
ENSDARG00000039322	CABZ01088149.1	2:2777536-2783095	wt	mut	OK	5.06478	2.81649	7.88127	-0.846602	-2.66621	5e-05	0.0012271	yes
ENSDARG00000078894	hemk1	6:41512598-41538787	wt	mut	OK	6.9047	10.003	16.9077	0.534783	1.81806	0.0017	0.0216618	yes
ENSDARG00000033655	stmn1b	16:34568946-34578775	wt	mut	OK	32.9343	47.7101	80.6444	0.534704	2.37363	5e-05	0.0012271	yes
ENSDARG00000039569	emx1	13:14873405-14879691	wt	mut	OK	2.48439	6.32261	8.807	1.34763	3.17972	5e-05	0.0012271	yes
ENSDARG00000091433	abhd17aa	2:49304928-49329681	wt	mut	OK	15.8	22.8866	38.6866	0.534581	2.11446	0.0002	0.00399838	yes
ENSDARG00000090986	si:dkeyp-115e12.6	14:8332193-8395765	wt	mut	OK	7.64378	11.0707	18.7145	0.53439	2.28756	0.0001	0.00224065	yes
ENSDARG00000039077	tyr	15:43776249-43795256	wt	mut	OK	4.7902	6.93092	11.7211	0.532961	1.66781	0.0034	0.0365712	yes
ENSDARG00000013843	sept5a	8:4532179-4562614	wt	mut	OK	7.49558	10.824	18.3196	0.530121	1.73718	0.0016	0.0207088	yes
ENSDARG00000002593	slc45a2	21:19409305-19447653	wt	mut	OK	7.29853	10.5279	17.8264	0.528535	1.80541	0.0019	0.0236342	yes
ENSDARG00000044074	loxl2b	5:26840167-26887645	wt	mut	OK	6.02037	8.68344	14.7038	0.528414	2.06569	0.0003	0.00565055	yes
ENSDARG00000039850	dusp22b	2:1011545-1028491	wt	mut	OK	1.66293	2.98494	4.64787	0.843978	1.52196	0.00495	0.0480058	yes
ENSDARG00000044899	tmem183a	11:22203003-22211504	wt	mut	OK	19.4792	28.0717	47.5509	0.527184	2.17846	0.00015	0.00315604	yes
ENSDARG00000015759	tspan7	14:41102223-41111138	wt	mut	OK	167.901	241.658	409.559	0.525354	2.54307	5e-05	0.0012271	yes
ENSDARG00000099281	LINC00998	4:6630721-6631845	wt	mut	OK	24.5155	35.2422	59.7577	0.523612	2.08224	0.0004	0.00703486	yes
ENSDARG00000042961	zgc:100920	8:23071915-23082308	wt	mut	OK	13.5567	19.4866	33.0433	0.523479	1.98841	0.00035	0.00635637	yes
ENSDARG00000040156	grm4	6:46980635-47386724	wt	mut	OK	1.08472	1.93516	3.01988	0.835129	1.95521	0.00215	0.025958	yes
ENSDARG00000042337	chrac1	19:41930196-41955517	wt	mut	OK	110.408	158.512	268.92	0.521742	2.30581	5e-05	0.0012271	yes
ENSDARG00000059006	otud5a	8:8822316-8884046	wt	mut	OK	10.844	15.5535	26.3975	0.520335	1.68189	0.00355	0.0377376	yes
ENSDARG00000040258	si:ch73-340m8.2	17:5672754-5703126	wt	mut	OK	1.27084	2.46857	3.73941	0.957899	1.90906	0.0018	0.0226351	yes
ENSDARG00000040280	FAM84B (1 of many)	16:25316930-25318483	wt	mut	OK	0.893851	1.7265	2.62035	0.949743	1.72359	0.0043	0.0433594	yes
ENSDARG00000028889	ndufb10	3:18255395-18261228	wt	mut	OK	84.1647	120.713	204.878	0.520292	2.29044	5e-05	0.0012271	yes
ENSDARG00000087193	prrg2	3:32285233-32292584	wt	mut	OK	8.16143	11.7032	19.8646	0.520007	1.65597	0.00375	0.0392828	yes
ENSDARG00000055976	pecr	11:30108257-30117663	wt	mut	OK	9.06616	12.9961	22.0623	0.519521	1.67825	0.0036	0.0380348	yes
ENSDARG00000030236	tmem30aa	17:49898253-49910216	wt	mut	OK	7.62122	10.9167	18.5379	0.518446	1.89337	0.0014	0.0186807	yes
ENSDARG00000040362	ehd2b	18:44656349-44669790	wt	mut	OK	3.29342	0.56342	3.85684	-2.5473	-5.63882	5e-05	0.0012271	yes
ENSDARG00000052702	capn1a	13:42555332-42598585	wt	mut	OK	8.23699	11.778	20.015	0.515908	2.06511	0.00035	0.00635637	yes
ENSDARG00000012968	rhoub	15:9014505-9026086	wt	mut	OK	34.5911	49.4499	84.041	0.515567	2.37865	0.0001	0.00224065	yes
ENSDARG00000091902	b3gnt2b	17:24018389-24063963	wt	mut	OK	14.6837	20.988	35.6717	0.515344	2.2442	0.0001	0.00224065	yes
ENSDARG00000040445	PARP14	9:23954717-23968628	wt	mut	OK	5.34836	3.90717	9.25553	-0.452973	-1.7901	0.0024	0.0281108	yes
ENSDARG00000038467	igsf8	6:58704243-58834167	wt	mut	OK	8.9633	12.7814	21.7447	0.511947	1.86859	0.002	0.0245944	yes
ENSDARG00000040610	si:ch73-352p4.8	4:5789652-5822952	wt	mut	OK	4.35637	1.10542	5.46179	-1.97853	-3.12968	5e-05	0.0012271	yes
ENSDARG00000040640	si:ch73-44m9.3	22:7729315-7748986	wt	mut	OK	2.70273	0.373661	3.07639	-2.85461	-2.84101	0.0005	0.00833478	yes
ENSDARG00000040649	prickle1a	25:291700-325877	wt	mut	OK	1.66294	3.21858	4.88152	0.95269	3.07599	5e-05	0.0012271	yes
ENSDARG00000077826	efcc1	11:26381516-26429011	wt	mut	OK	8.7324	12.4372	21.1696	0.510217	1.98107	0.00065	0.0102791	yes
ENSDARG00000040732	elavl2	22:38299578-38321088	wt	mut	OK	4.09177	0.7629	4.85467	-2.42316	-3.04665	5e-05	0.0012271	yes
ENSDARG00000040851	plekhh2	13:8515397-8560491	wt	mut	OK	2.83418	1.64186	4.47604	-0.7876	-2.42834	0.0001	0.00224065	yes
ENSDARG00000040910	ildr1b	9:34451418-34459881	wt	mut	OK	2.3065	3.66755	5.97405	0.669115	1.90997	0.0011	0.0155943	yes
ENSDARG00000103744	HACD1	7:58718617-58728640	wt	mut	OK	4.60471	6.55386	11.1586	0.509235	1.68565	0.004	0.0411766	yes
ENSDARG00000041022	pdcd4b	22:29709787-29740786	wt	mut	OK	5.8938	3.61017	9.50397	-0.707133	-2.15455	0.0002	0.00399838	yes
ENSDARG00000093378	si:ch211-235i11.5	17:50334014-50343515	wt	mut	OK	6.521	9.27236	15.7934	0.507843	1.85919	0.0014	0.0186807	yes
ENSDARG00000039682	si:ch211-121a2.2	20:7080754-7090591	wt	mut	OK	28.9746	41.1996	70.1742	0.507839	1.78441	0.00185	0.0231458	yes
ENSDARG00000041068	got2a	18:21189654-21199702	wt	mut	OK	2.41539	3.89564	6.31103	0.689605	1.97459	0.001	0.0144983	yes
ENSDARG00000022303	higd1a	2:1825740-1830943	wt	mut	OK	15.0956	21.4605	36.5561	0.507552	1.81656	0.0017	0.0216618	yes
ENSDARG00000041119	ceacam1	16:11833327-11869694	wt	mut	OK	0.999396	0.516447	1.51584	-0.952436	-1.89279	0.00105	0.0150587	yes
ENSDARG00000044596	pgap2	21:30937001-30957882	wt	mut	OK	9.50354	13.5051	23.0086	0.506973	1.69128	0.00355	0.0377376	yes
ENSDARG00000099923	zgc:154054	14:49875229-49933789	wt	mut	OK	12.5293	17.7992	30.3285	0.506507	1.68775	0.00305	0.0336026	yes
ENSDARG00000015709	hsd17b12a	25:29753031-29787552	wt	mut	OK	21.7103	30.8302	52.5405	0.505966	1.89928	0.00055	0.00903729	yes
ENSDARG00000016238	arl6ip5b	23:4315055-4320811	wt	mut	OK	10.0514	14.2678	24.3192	0.505372	1.68692	0.004	0.0411766	yes
ENSDARG00000034885	bet1	19:41312789-41319041	wt	mut	OK	18.4857	26.2247	44.7104	0.50452	1.67319	0.00395	0.0408569	yes
ENSDARG00000077467	sox10	3:2013056-2022138	wt	mut	OK	4.19062	5.94104	10.1317	0.503552	1.77033	0.0027	0.0307074	yes
ENSDARG00000041511	pex10	8:47329337-47339289	wt	mut	OK	3.6028	1.75288	5.35568	-1.0394	-2.34844	5e-05	0.0012271	yes
ENSDARG00000041616	b3gnt9	18:17522928-17524485	wt	mut	OK	2.61627	4.93825	7.55452	0.91649	2.23259	0.00025	0.0048518	yes
ENSDARG00000035161	pkdcca	13:2975429-3022092	wt	mut	OK	8.61191	12.2063	20.8182	0.503226	1.81272	0.002	0.0245944	yes
ENSDARG00000005834	gatad2b	19:42056971-42139107	wt	mut	OK	6.9837	9.89742	16.8811	0.503062	1.8551	0.00125	0.0172117	yes
ENSDARG00000014015	zgc:77086	16:30464553-30476352	wt	mut	OK	53.6005	75.6533	129.254	0.497156	2.388	5e-05	0.0012271	yes
ENSDARG00000057936	lhx5	21:15815539-15870923	wt	mut	OK	19.9358	28.1374	48.0732	0.497126	2.13079	0.0001	0.00224065	yes
ENSDARG00000041980	fam26f	16:32272633-32279433	wt	mut	OK	0.452847	2.3544	2.80725	2.37826	3.61418	5e-05	0.0012271	yes
ENSDARG00000078442	NOP9	2:58418609-58446084	wt	mut	OK	5.3473	7.53932	12.8866	0.495624	1.63254	0.005	0.0482736	yes
ENSDARG00000069425	hsbp1a	7:26357890-26362868	wt	mut	OK	27.378	38.5947	65.9727	0.495384	1.71162	0.00345	0.0368791	yes
ENSDARG00000042186	paplnb	20:33596498-33609564	wt	mut	OK	0.172287	1.04386	1.21615	2.59905	1.76075	0.0006	0.00968363	yes
ENSDARG00000042210	sema3ab	18:9354097-9470930	wt	mut	OK	5.85587	3.44313	9.299	-0.766164	-2.46769	0.00015	0.00315604	yes
ENSDARG00000077226	smarca4a	3:19096063-19132138	wt	mut	OK	78.216	110.228	188.444	0.494957	2.37202	5e-05	0.0012271	yes
ENSDARG00000058231	nt5c2b	1:31076604-31124108	wt	mut	OK	26.3467	37.1295	63.4762	0.494941	2.04316	0.00085	0.0128191	yes
ENSDARG00000041051	mid1ip1a	9:30452441-30453669	wt	mut	OK	39.8977	56.167	96.0647	0.493419	2.09243	0.0004	0.00703486	yes
ENSDARG00000040186	fam210ab	16:30646459-30654803	wt	mut	OK	10.4177	14.6472	25.0649	0.491595	1.76788	0.0022	0.0263587	yes
ENSDARG00000028715	fam188a	16:28335413-28436707	wt	mut	OK	10.241	14.3911	24.6321	0.490812	2.01118	0.00075	0.0116365	yes
ENSDARG00000042521	SLC25A5 (1 of many)	5:66770294-66781169	wt	mut	OK	5.08808	2.86554	7.95362	-0.828314	-1.6811	0.00395	0.0408569	yes
ENSDARG00000042545	sema3ga	8:25631089-25678140	wt	mut	OK	1.51352	4.0539	5.56742	1.4214	2.12711	0.0001	0.00224065	yes
ENSDARG00000020079	neil3	14:36074541-36088123	wt	mut	OK	19.997	28.0993	48.0963	0.490753	1.81834	0.0017	0.0216618	yes
ENSDARG00000018788	st8sia2	18:25040962-25065314	wt	mut	OK	10.4387	14.664	25.1027	0.490331	1.94935	0.0008	0.012247	yes
ENSDARG00000015686	bmp6	24:7832053-7906490	wt	mut	OK	11.4616	16.0938	27.5554	0.489697	1.96668	0.00075	0.0116365	yes
ENSDARG00000038213	slc35b1	3:20813421-20832966	wt	mut	OK	20.5028	28.7621	49.2649	0.488349	2.10903	0.00035	0.00635637	yes
ENSDARG00000068978	glo1	13:44651172-44671879	wt	mut	OK	11.6129	16.2842	27.8971	0.487746	1.78737	0.0018	0.0226351	yes
ENSDARG00000042807	slc16a4	8:24725901-24760750	wt	mut	OK	1.7146	0.874007	2.58861	-0.972156	-2.33447	0.00015	0.00315604	yes
ENSDARG00000042861	ltk	17:31383620-31466506	wt	mut	OK	0.596196	1.0396	1.6358	0.802168	1.874	0.00135	0.0182536	yes
ENSDARG00000035066	ubtf	3:19892163-19914390	wt	mut	OK	29.3245	41.05	70.3745	0.485276	2.1871	0.0002	0.00399838	yes
ENSDARG00000058088	aifm1	5:22046813-22069974	wt	mut	OK	15.1594	21.2113	36.3707	0.484619	2.10943	0.0003	0.00565055	yes
ENSDARG00000020482	nono	5:22089475-22099210	wt	mut	OK	247.178	345.416	592.594	0.482783	2.25238	5e-05	0.0012271	yes
ENSDARG00000056600	papss2b	12:17337074-17357204	wt	mut	OK	38.0191	53.1172	91.1363	0.482454	2.2607	0.0001	0.00224065	yes
ENSDARG00000077696	FAM188B	8:18470428-18502176	wt	mut	OK	5.5627	7.77172	13.3344	0.482449	1.69565	0.0034	0.0365712	yes
ENSDARG00000042978	cyp2p6	20:25664014-25669351	wt	mut	OK	1.79997	3.13536	4.93533	0.800662	2.08809	0.00045	0.00770223	yes
ENSDARG00000104496	CR388042.3	4:51979571-51991944	wt	mut	OK	5.9578	8.32328	14.2811	0.482373	1.80576	0.0018	0.0226351	yes
ENSDARG00000100481	smg6	10:35640786-35669892	wt	mut	OK	6.2803	8.77063	15.0509	0.481847	2.05147	0.00015	0.00315604	yes
ENSDARG00000026629	gmds	20:26809914-26923467	wt	mut	OK	36.0616	50.2756	86.3372	0.479395	1.9643	0.0008	0.012247	yes
ENSDARG00000043179	bag4	8:44605498-44617451	wt	mut	OK	3.67251	2.32143	5.99394	-0.661751	-1.69795	0.0044	0.0442127	yes
ENSDARG00000042707	cx30.3	9:21590319-21594197	wt	mut	OK	14.0671	19.5961	33.6632	0.478245	1.90102	0.0009	0.0133859	yes
ENSDARG00000043279	aqp12	22:2857784-2870671	wt	mut	OK	3.45016	0.835942	4.2861	-2.04519	-3.33362	5e-05	0.0012271	yes
ENSDARG00000003216	anxa2a	25:33527665-33541952	wt	mut	OK	31.6116	44.0291	75.6407	0.478006	2.05541	0.00045	0.00770223	yes
ENSDARG00000043416	tnfaip2a	20:18762040-18785769	wt	mut	OK	1.98647	3.43743	5.4239	0.791122	1.77828	0.00105	0.0150587	yes
ENSDARG00000031222	lhx2b	8:3026370-3042643	wt	mut	OK	18.1979	25.3059	43.5038	0.475704	2.0005	0.00055	0.00903729	yes
ENSDARG00000069910	gtf2f2a	1:33962804-33974335	wt	mut	OK	92.7247	128.908	221.633	0.47531	2.19798	5e-05	0.0012271	yes
ENSDARG00000043480	rbbp8	24:36315955-36335871	wt	mut	OK	6.07762	0.710837	6.78846	-3.09591	-5.14544	5e-05	0.0012271	yes
ENSDARG00000043514	si:dkey-239i20.4	20:15215448-15232648	wt	mut	OK	1.43828	0.813432	2.25171	-0.82225	-1.74718	0.0038	0.0396621	yes
ENSDARG00000026865	fam107b	18:12307848-12358760	wt	mut	OK	19.8206	27.5292	47.3498	0.473963	1.58531	0.005	0.0482736	yes
ENSDARG00000043581	gadd45aa	2:10497045-10500973	wt	mut	OK	1.59767	3.12785	4.72552	0.969201	1.95189	0.0011	0.0155943	yes
ENSDARG00000098916	krit1	19:46400433-46427532	wt	mut	OK	12.2305	16.9853	29.2158	0.473804	1.62284	0.0052	0.0497039	yes
ENSDARG00000089480	si:dkey-12j5.1	16:28177740-28333704	wt	mut	OK	32.0318	44.4413	76.4731	0.472398	2.10345	0.00035	0.00635637	yes
ENSDARG00000041723	zgc:55461	5:32418610-32421861	wt	mut	OK	34.2853	47.5483	81.8336	0.471803	2.09217	0.00025	0.0048518	yes
ENSDARG00000024933	spast	1:50377479-50395086	wt	mut	OK	6.84773	9.49654	16.3443	0.471776	1.72794	0.0023	0.0272167	yes
ENSDARG00000101471	fgd4a	18:12168573-12260806	wt	mut	OK	6.08585	8.43528	14.5211	0.470977	1.70583	0.00275	0.031112	yes
ENSDARG00000105318	HIST1H4H (1 of many)	7:6221741-6222135	wt	mut	OK	622.157	862.301	1484.46	0.470914	2.23375	5e-05	0.0012271	yes
ENSDARG00000044010	loxl2a	10:20448330-20490054	wt	mut	OK	3.12128	1.72991	4.85119	-0.851443	-2.39186	5e-05	0.0012271	yes
ENSDARG00000044011	xkrx	14:40951157-40973606	wt	mut	OK	6.01719	3.58901	9.6062	-0.745506	-2.40337	5e-05	0.0012271	yes
ENSDARG00000008540	sox21b	9:53736848-53738215	wt	mut	OK	20.0179	27.709	47.7269	0.469061	1.87545	0.0007	0.0109792	yes
ENSDARG00000043322	gsx2	20:22583374-22584948	wt	mut	OK	11.9271	16.4978	28.4249	0.468025	1.63835	0.0045	0.0448001	yes
ENSDARG00000091756	insm1a	20:48675358-48677782	wt	mut	OK	11.5149	15.9187	27.4336	0.467211	1.86038	0.00115	0.0161047	yes
ENSDARG00000052154	lix1	5:64133317-64150043	wt	mut	OK	20.2518	27.9895	48.2413	0.466835	1.71146	0.0022	0.0263587	yes
ENSDARG00000044381	siah2l	21:38611595-38670148	wt	mut	OK	4.26372	2.58482	6.84854	-0.722048	-1.87146	0.00135	0.0182536	yes
ENSDARG00000103777	znf1001	3:7623482-7650198	wt	mut	OK	6.21544	8.56343	14.7789	0.462332	1.62239	0.0048	0.0469203	yes
ENSDARG00000044532	nr4a2b	6:12227220-12231692	wt	mut	OK	0.456356	0.903507	1.35986	0.985375	1.74734	0.0035	0.0373442	yes
ENSDARG00000022260	FEZ2 (1 of many)	20:46837340-46855799	wt	mut	OK	21.3296	29.3833	50.7129	0.46214	1.87832	0.001	0.0144983	yes
ENSDARG00000017354	epha2a	6:45872712-45903864	wt	mut	OK	42.2915	58.2557	100.547	0.462029	1.78893	0.0027	0.0307074	yes
ENSDARG00000075549	cdh5	7:44106369-44250008	wt	mut	OK	5.51797	7.59786	13.1158	0.461455	1.66123	0.004	0.0411766	yes
ENSDARG00000021948	tnc	5:27960852-28025364	wt	mut	OK	34.1238	46.9858	81.1096	0.461448	1.7477	0.0004	0.00703486	yes
ENSDARG00000044895	fmoda	11:20865326-20871205	wt	mut	OK	6.52999	2.5497	9.07969	-1.35675	-3.78107	5e-05	0.0012271	yes
ENSDARG00000087835	si:ch211-113p18.3	15:8338860-8343917	wt	mut	OK	8.72028	11.9389	20.6592	0.453225	1.62935	0.00515	0.0492806	yes
ENSDARG00000015015	tspan18b	18:27754044-27834924	wt	mut	OK	8.50066	11.6336	20.1343	0.452655	1.62347	0.0048	0.0469203	yes
ENSDARG00000092035	si:ch211-156j16.1	8:26799306-26819706	wt	mut	OK	11.1779	15.2962	26.4741	0.452524	1.69391	0.0027	0.0307074	yes
ENSDARG00000044975	krt94	11:11484944-11488236	wt	mut	OK	5.39463	2.02526	7.41989	-1.41342	-3.69463	5e-05	0.0012271	yes
ENSDARG00000082614	U2	7:69240863-69399342	wt	mut	OK	5747.02	7853.67	13600.7	0.450554	1.72953	0.00235	0.0276566	yes
ENSDARG00000041799	cx43	20:40818052-40823420	wt	mut	OK	12.3208	16.827	29.1478	0.449679	1.86872	0.0013	0.0177164	yes
ENSDARG00000045153	slc16a8	12:19069912-19076897	wt	mut	OK	4.38109	1.05389	5.43498	-2.05557	-4.54963	5e-05	0.0012271	yes
ENSDARG00000016084	spsb4a	2:39618426-39710190	wt	mut	OK	18.0748	24.683	42.7578	0.44954	1.87896	0.0014	0.0186807	yes
ENSDARG00000019726	celsr2	22:393426-430714	wt	mut	OK	10.2032	13.9303	24.1335	0.449197	1.98905	0.0005	0.00833478	yes
ENSDARG00000103347	cyp2aa3	23:42516640-42528380	wt	mut	OK	9.50243	12.9692	22.4716	0.448718	1.5869	0.0047	0.0463102	yes
ENSDARG00000002344	tubb4b	14:5554600-5558312	wt	mut	OK	581.679	793.777	1375.46	0.44851	2.0972	0.0001	0.00224065	yes
ENSDARG00000014366	luc7l3	3:58746482-58764456	wt	mut	OK	31.5698	43.0636	74.6334	0.447924	2.03596	0.00065	0.0102791	yes
ENSDARG00000045413	gcm2	24:8687216-8691526	wt	mut	OK	3.56112	2.15069	5.71181	-0.727529	-1.82876	0.00085	0.0128191	yes
ENSDARG00000045438	GJD4	24:4402485-4408464	wt	mut	OK	1.59592	0.958241	2.55416	-0.735931	-1.86232	0.0016	0.0207088	yes
ENSDARG00000025391	pfdn2	7:7244028-7260389	wt	mut	OK	52.9862	72.2604	125.247	0.447588	2.09376	0.0003	0.00565055	yes
ENSDARG00000041435	uba52	2:56215212-56224882	wt	mut	OK	1833.38	2500.21	4333.59	0.447546	2.14683	0.0002	0.00399838	yes
ENSDARG00000045888	acat1	10:38720560-38752666	wt	mut	OK	9.64721	13.122	22.7692	0.44381	1.65466	0.00335	0.036214	yes
ENSDARG00000103830	ddr2l	5:9195236-9288553	wt	mut	OK	16.9419	23.0343	39.9762	0.443187	1.95698	0.00055	0.00903729	yes
ENSDARG00000033172	nr2f5	16:46327620-46360585	wt	mut	OK	68.3526	92.9017	161.254	0.44271	2.13698	0.00015	0.00315604	yes
ENSDARG00000008859	mylipa	19:26756512-26794432	wt	mut	OK	6.79083	9.22835	16.0192	0.442484	1.64599	0.00405	0.0414933	yes
ENSDARG00000039490	pitpnaa	15:28477787-28492135	wt	mut	OK	14.5996	19.8277	34.4273	0.441584	1.73542	0.00245	0.02858	yes
ENSDARG00000025348	igfbp5b	9:47020156-47041700	wt	mut	OK	7.03977	9.54834	16.5881	0.439721	1.89551	0.00105	0.0150587	yes
ENSDARG00000105223	pmp22a	3:49821186-49825090	wt	mut	OK	191.916	260.066	451.982	0.438404	2.08525	0.00035	0.00635637	yes
ENSDARG00000074686	mgea5	13:11856357-11873532	wt	mut	OK	31.9203	43.2198	75.1401	0.437221	2.09821	0.0003	0.00565055	yes
ENSDARG00000046124	rab11fip1a	8:37965421-37989350	wt	mut	OK	3.1085	5.64984	8.75834	0.861993	2.24705	0.00015	0.00315604	yes
ENSDARG00000061845	si:dkeyp-110e4.6	14:26128888-26139062	wt	mut	OK	9.25962	12.5301	21.7897	0.436368	1.78679	0.00145	0.0191553	yes
ENSDARG00000004094	acsbg2	8:20125712-20160078	wt	mut	OK	18.3278	24.7833	43.1111	0.435334	2.00705	0.0007	0.0109792	yes
ENSDARG00000042975	auh	10:5422270-5475386	wt	mut	OK	17.183	23.2349	40.4179	0.435314	1.74702	0.00255	0.0294479	yes
ENSDARG00000008748	ube2na	18:15809597-15824651	wt	mut	OK	45.6384	61.4977	107.136	0.430282	1.97913	0.0005	0.00833478	yes
ENSDARG00000036893	f13a1b	7:8024804-8098285	wt	mut	OK	10.7498	14.4775	25.2273	0.429508	1.74192	0.0023	0.0272167	yes
ENSDARG00000103234	ppie	17:25278468-25284973	wt	mut	OK	32.0178	43.109	75.1268	0.429112	1.74665	0.00265	0.0302985	yes
ENSDARG00000079255	zgc:174935	16:17804510-17807155	wt	mut	OK	18.1238	24.3747	42.4985	0.427498	1.72012	0.00255	0.0294479	yes
ENSDARG00000052037	trim35-1	1:57303868-57313833	wt	mut	OK	0.264295	1.03771	1.302	1.97319	3.37505	5e-05	0.0012271	yes
ENSDARG00000052039	caspb	1:57315222-57329056	wt	mut	OK	1.25761	4.71964	5.97725	1.90799	4.2868	5e-05	0.0012271	yes
ENSDARG00000052118	ADAMTSL5	7:50175701-50244247	wt	mut	OK	0.674574	1.34083	2.0154	0.991078	1.78524	0.0032	0.0348326	yes
ENSDARG00000008372	spred2b	13:5450510-5808557	wt	mut	OK	9.0293	12.1147	21.144	0.424074	1.71667	0.0027	0.0307074	yes
ENSDARG00000079611	sema4c	5:14028883-14148068	wt	mut	OK	12.2948	16.4814	28.7762	0.422786	1.81418	0.00175	0.0221517	yes
ENSDARG00000052417	NATD1 (1 of many)	3:58165893-58170734	wt	mut	OK	4.54698	1.28228	5.82926	-1.8262	-3.4226	5e-05	0.0012271	yes
ENSDARG00000052426	si:ch211-256e16.3	3:58062702-58083965	wt	mut	OK	1.20137	0.595749	1.79712	-1.0119	-1.99423	0.00165	0.0211497	yes
ENSDARG00000015559	fstl1a	1:46768490-46794128	wt	mut	OK	26.0816	34.9419	61.0235	0.421927	1.78564	0.00195	0.0241864	yes
ENSDARG00000056666	sp8b	16:19730794-19732953	wt	mut	OK	38.7444	51.893	90.6374	0.421553	1.66102	0.00365	0.0384219	yes
ENSDARG00000094752	rpe65b	8:16641181-16662200	wt	mut	OK	36.7875	49.2159	86.0034	0.419911	1.79661	0.00155	0.0201828	yes
ENSDARG00000044090	zmpste24	17:24585971-24594660	wt	mut	OK	37.5653	50.1366	87.7019	0.416465	1.95761	0.00045	0.00770223	yes
ENSDARG00000052741	card11	3:41416823-41490201	wt	mut	OK	2.53205	1.30766	3.83971	-0.953322	-2.63421	5e-05	0.0012271	yes
ENSDARG00000052826	runx3	13:44955861-45063957	wt	mut	OK	0.772341	0.382454	1.1548	-1.01395	-1.65264	0.0021	0.0254612	yes
ENSDARG00000006566	nlk1	3:20916574-20944785	wt	mut	OK	40.2908	53.703	93.9938	0.414552	1.9535	0.00065	0.0102791	yes
ENSDARG00000079233	E2F2	17:27225055-27247662	wt	mut	OK	9.39848	12.5264	21.9249	0.414473	1.67757	0.00345	0.0368791	yes
ENSDARG00000053248	inab	1:31131835-31135149	wt	mut	OK	3.66701	5.47018	9.13719	0.576986	1.69858	0.00455	0.0452196	yes
ENSDARG00000041339	zgc:92380	9:48309685-48342569	wt	mut	OK	40.6617	54.1702	94.8319	0.413827	1.8628	0.0011	0.0155943	yes
ENSDARG00000053293	ftr14	2:43281728-43286282	wt	mut	OK	2.64059	1.38926	4.02985	-0.926544	-2.25347	0.0003	0.00565055	yes
ENSDARG00000058302	sh3bgrl	14:9084835-9114897	wt	mut	OK	28.5603	38.0475	66.6078	0.413789	1.94503	0.00055	0.00903729	yes
ENSDARG00000053431	si:ch211-257p13.3	16:16646709-16682803	wt	mut	OK	1.10406	1.78673	2.89079	0.694495	1.93762	0.0009	0.0133859	yes
ENSDARG00000040387	mmd	3:11581972-11609794	wt	mut	OK	17.8716	23.7884	41.66	0.412593	1.69918	0.0036	0.0380348	yes
ENSDARG00000021442	cdh11	7:43420923-43501455	wt	mut	OK	13.8708	18.4614	32.3322	0.412467	1.85213	0.00165	0.0211497	yes
ENSDARG00000032264	mybl2b	11:1525017-1548068	wt	mut	OK	32.0609	42.6022	74.6631	0.410113	1.75521	0.002	0.0245944	yes
ENSDARG00000062970	fam129ba	21:13702718-13759960	wt	mut	OK	9.07686	12.0244	21.1013	0.405695	1.74047	0.00195	0.0241864	yes
ENSDARG00000041921	hsbp1b	18:14365610-14368949	wt	mut	OK	140.134	185.516	325.65	0.40474	1.8084	0.0011	0.0155943	yes
ENSDARG00000016516	rbm8a	16:45955458-45963361	wt	mut	OK	268.193	353.835	622.028	0.399802	1.93149	0.0009	0.0133859	yes
ENSDARG00000019717	pbx2	16:48674201-48701154	wt	mut	OK	41.6809	54.8989	96.5798	0.397391	1.68038	0.00225	0.0267534	yes
ENSDARG00000054023	ttll6	12:27005474-27024052	wt	mut	OK	1.40705	0.656587	2.06364	-1.09962	-1.39949	0.0034	0.0365712	yes
ENSDARG00000008542	yod1	11:37441635-37453061	wt	mut	OK	16.2458	21.3721	37.6179	0.395662	1.76466	0.00225	0.0267534	yes
ENSDARG00000045694	prickle1b	4:13964649-13996917	wt	mut	OK	17.0336	22.3965	39.4301	0.394886	1.73727	0.00275	0.031112	yes
ENSDARG00000043640	cenpn	18:29920700-29927756	wt	mut	OK	18.6437	24.4985	43.1422	0.394009	1.63749	0.00515	0.0492806	yes
ENSDARG00000034668	celf3a	19:8897731-8961763	wt	mut	OK	13.5449	17.7985	31.3434	0.394006	1.59715	0.00475	0.046643	yes
ENSDARG00000035809	col1a1b	12:3060965-3098750	wt	mut	OK	7.30172	9.58325	16.885	0.392279	1.65769	0.00405	0.0414933	yes
ENSDARG00000054288	zgc:63972	5:33340061-33359715	wt	mut	OK	1.61521	3.18888	4.80409	0.98133	2.1478	0.00045	0.00770223	yes
ENSDARG00000054542	il12bb	21:35255585-35269628	wt	mut	OK	0.638194	2.62001	3.2582	2.0375	3.97746	5e-05	0.0012271	yes
ENSDARG00000054649	rac1l	1:56257528-56470916	wt	mut	OK	0.536759	1.35948	1.89624	1.34071	1.51068	0.0022	0.0263587	yes
ENSDARG00000009315	clgn	1:39854683-39890319	wt	mut	OK	22.0429	28.9242	50.9671	0.391961	1.78217	0.0018	0.0226351	yes
ENSDARG00000054957	znf1015	4:71931860-71945671	wt	mut	OK	1.6756	2.65418	4.32978	0.663585	1.79709	0.00165	0.0211497	yes
ENSDARG00000055009	col4a1	9:8652641-8691828	wt	mut	OK	0.71584	1.19404	1.90988	0.738136	2.12346	0.0002	0.00399838	yes
ENSDARG00000078133	kdm2ab	14:21457275-21484982	wt	mut	OK	25.9174	33.9316	59.849	0.388705	1.87253	0.0012	0.0166562	yes
ENSDARG00000099900	peo1	12:33705368-33716131	wt	mut	OK	12.8049	16.7517	29.5566	0.387611	1.62857	0.00395	0.0408569	yes
ENSDARG00000055225	dock8	8:30316666-30415790	wt	mut	OK	4.15516	1.96407	6.11923	-1.08105	-3.79503	5e-05	0.0012271	yes
ENSDARG00000076439	ppp4cb	12:3927585-3941577	wt	mut	OK	83.8692	109.687	193.556	0.387176	1.85413	0.0008	0.012247	yes
ENSDARG00000055416	serpinb1	20:26981577-26987759	wt	mut	OK	3.14623	1.58895	4.73518	-0.985551	-2.07399	0.00065	0.0102791	yes
ENSDARG00000055506	si:ch211-37e10.1	24:6063825-6067268	wt	mut	OK	0	1.20595	1.20595	inf	#NAME?	5e-05	0.0012271	yes
ENSDARG00000055534	grk7b	18:41750549-41763828	wt	mut	OK	0.619135	1.4307	2.04983	1.2084	2.08929	0.0013	0.0177164	yes
ENSDARG00000055730	trim35-29	16:26973052-26975876	wt	mut	OK	0.482488	1.15134	1.63383	1.25475	2.01327	0.0019	0.0236342	yes
ENSDARG00000055876	msmo1	1:20223613-20235835	wt	mut	OK	1.32356	0.478506	1.80207	-1.46782	-2.18642	0.00085	0.0128191	yes
ENSDARG00000031382	reep2	14:21299470-21320760	wt	mut	OK	11.6609	15.2483	26.9092	0.386973	1.63629	0.0047	0.0463102	yes
ENSDARG00000075954	serpinh1a	10:38568502-38600668	wt	mut	OK	81.1667	106.053	187.22	0.385821	1.85664	0.0014	0.0186807	yes
ENSDARG00000036826	ankrd52a	23:32435553-32464211	wt	mut	OK	11.4443	14.9388	26.3831	0.384435	1.64114	0.0046	0.0456114	yes
ENSDARG00000039667	mrpl38	12:44867468-44886420	wt	mut	OK	36.5024	47.5561	84.0585	0.381641	1.6461	0.0042	0.042525	yes
ENSDARG00000008757	entpd6	17:21082464-21103739	wt	mut	OK	46.2954	60.3049	106.6	0.381407	1.75006	0.0022	0.0263587	yes
ENSDARG00000056045	GUCY2C (1 of many)	12:18943609-18969340	wt	mut	OK	1.7721	3.1467	4.9188	0.828377	2.40856	0.0001	0.00224065	yes
ENSDARG00000103127	gpn2	16:33984196-33989698	wt	mut	OK	36.1619	47.0749	83.2368	0.380489	1.61883	0.00505	0.0486475	yes
ENSDARG00000056092	si:dkey-12h9.6	20:26127427-26142980	wt	mut	OK	0.644998	1.17906	1.82406	0.870271	1.83399	0.0026	0.0298455	yes
ENSDARG00000035634	rfc5	5:12028475-12060352	wt	mut	OK	95.0314	123.654	218.685	0.379832	1.68527	0.00305	0.0336026	yes
ENSDARG00000101089	gart	18:160819-188582	wt	mut	OK	32.1278	41.7365	73.8643	0.377488	1.75222	0.0021	0.0254612	yes
ENSDARG00000067805	ggcx	10:7744531-7764757	wt	mut	OK	23.768	30.8305	54.5985	0.37534	1.69832	0.00295	0.0327308	yes
ENSDARG00000056387	rnf17	9:29737883-29760485	wt	mut	OK	1.01558	1.99715	3.01273	0.975635	2.74123	5e-05	0.0012271	yes
ENSDARG00000060586	ctdspl2b	7:31103232-31122429	wt	mut	OK	23.7265	30.723	54.4495	0.372821	1.7532	0.0025	0.0290455	yes
ENSDARG00000059367	mfap2	22:71557-75573	wt	mut	OK	50.3801	65.1523	115.532	0.370963	1.71212	0.00215	0.025958	yes
ENSDARG00000056519	si:dkey-280e21.3	14:25168085-25205292	wt	mut	OK	2.41168	3.99854	6.41022	0.729435	2.65251	5e-05	0.0012271	yes
ENSDARG00000104285	zgc:63733	22:35037693-35087777	wt	mut	OK	20.5933	26.6268	47.2201	0.370704	1.59737	0.00515	0.0492806	yes
ENSDARG00000056618	xk	11:29571214-29586524	wt	mut	OK	1.60272	0.749985	2.3527	-1.09559	-1.91336	0.0019	0.0236342	yes
ENSDARG00000045155	phf5a	12:19016577-19021818	wt	mut	OK	166.202	214.433	380.635	0.36759	1.63924	0.00485	0.0472485	yes
ENSDARG00000009982	fam199x	14:10032402-10065624	wt	mut	OK	11.135	14.3228	25.4578	0.363218	1.6816	0.004	0.0411766	yes
ENSDARG00000045857	cebpz	20:3272686-3292516	wt	mut	OK	42.4006	54.5282	96.9288	0.362916	1.70761	0.0024	0.0281108	yes
ENSDARG00000037514	hdac3	14:11872900-11899851	wt	mut	OK	51.0586	65.6534	116.712	0.362715	1.67325	0.00295	0.0327308	yes
ENSDARG00000105382	HIST1H4A (1 of many)	7:6216346-6216752	wt	mut	OK	1111	1428.44	2539.44	0.362578	1.75434	0.00225	0.0267534	yes
ENSDARG00000095273	cox8a	21:28441967-28465575	wt	mut	OK	271.431	348.807	620.238	0.361844	1.68825	0.0034	0.0365712	yes
ENSDARG00000057426	oard1	23:19286843-19299366	wt	mut	OK	1.9006	0.465106	2.36571	-2.03082	-3.80313	5e-05	0.0012271	yes
ENSDARG00000059908	si:ch211-217k17.7	1:51817271-51826584	wt	mut	OK	73.7115	94.7189	168.43	0.361761	1.66987	0.0033	0.0357631	yes
ENSDARG00000105409	si:ch1073-159d7.2	7:6324607-6325004	wt	mut	OK	3074.92	3948.71	7023.63	0.360831	1.72537	0.00255	0.0294479	yes
ENSDARG00000056122	gdi1	23:26136607-26150497	wt	mut	OK	31.5231	40.4596	71.9827	0.360069	1.69881	0.0034	0.0365712	yes
ENSDARG00000103819	HIST2H3A	7:5783443-5784093	wt	mut	OK	343.488	437.791	781.279	0.349984	1.67849	0.00445	0.0445336	yes
ENSDARG00000074849	rac1a	12:10427053-10438605	wt	mut	OK	137.79	175.319	313.109	0.347505	1.67018	0.00315	0.034375	yes
ENSDARG00000018902	pes	5:12336695-12365169	wt	mut	OK	62.3171	79.2216	141.539	0.346267	1.60115	0.00345	0.0368791	yes
ENSDARG00000057833	gulp1b	6:11262218-11378912	wt	mut	OK	1.09575	2.03361	3.12936	0.892124	1.72456	0.0045	0.0448001	yes
ENSDARG00000057881	si:dkey-33c12.3	13:8981753-8986868	wt	mut	OK	0.792972	0.362718	1.15569	-1.12842	-1.93101	0.00225	0.0267534	yes
ENSDARG00000057886	BX901922.1	13:9001293-9003868	wt	mut	OK	2.36008	0.792331	3.15241	-1.57466	-2.10052	0.0037	0.0388297	yes
ENSDARG00000057911	zgc:86709	20:9983545-9993078	wt	mut	OK	0.321781	1.19491	1.51669	1.89275	2.38988	0.00105	0.0150587	yes
ENSDARG00000077095	HIPK1 (1 of many)	11:2580536-2614625	wt	mut	OK	13.0199	16.4385	29.4584	0.336358	1.57055	0.005	0.0482736	yes
ENSDARG00000005941	yes1	2:31287863-31393389	wt	mut	OK	45.8279	45.0407	90.8686	-0.0249987	-0.110878	0.8388	0.954542	no
ENSDARG00000010770	sox19a	5:23695379-23697637	wt	mut	OK	303.17	240.488	543.658	-0.33416	-1.60591	0.0042	0.042525	yes
ENSDARG00000026369	dbi	9:907949-915377	wt	mut	OK	95.9134	75.6747	171.588	-0.341921	-1.59762	0.0042	0.042525	yes
ENSDARG00000018461	FTL	24:7712201-7717159	wt	mut	OK	143.35	112.983	256.333	-0.343433	-1.6136	0.0049	0.047628	yes
ENSDARG00000032532	arpp19a	18:38904300-38916656	wt	mut	OK	30.0968	23.6281	53.7249	-0.349111	-1.64362	0.00445	0.0445336	yes
ENSDARG00000032373	rnf145b	21:33967221-33998160	wt	mut	OK	25.9773	20.3798	46.3571	-0.350111	-1.61432	0.0048	0.0469203	yes
ENSDARG00000102571	metap2b	25:3106067-3121599	wt	mut	OK	121.37	95.0688	216.439	-0.352368	-1.63968	0.0036	0.0380348	yes
ENSDARG00000101813	nap1l1	4:1469443-1496899	wt	mut	OK	94.624	74.1174	168.741	-0.352393	-1.70822	0.00295	0.0327308	yes
ENSDARG00000042780	apoba	17:30687104-30711003	wt	mut	OK	24.5308	19.1011	43.6319	-0.360943	-1.6229	0.005	0.0482736	yes
ENSDARG00000000103	myh10	6:7395915-7501116	wt	mut	OK	32.7791	25.5049	58.284	-0.362005	-1.32656	0.0042	0.042525	yes
ENSDARG00000058508	CFAP70	3:12036960-12087556	wt	mut	OK	0.178163	2.40864	2.5868	3.75695	5.2822	5e-05	0.0012271	yes
ENSDARG00000060695	znf346	21:37405592-37423314	wt	mut	OK	56.3873	43.8137	100.201	-0.363987	-1.67527	0.00295	0.0327308	yes
ENSDARG00000058644	dnajb2	9:7643230-7676910	wt	mut	OK	5.09231	2.57375	7.66606	-0.984446	-1.70181	0.0029	0.0323424	yes
ENSDARG00000058679	zgc:114104	21:11428534-11436742	wt	mut	OK	4.12148	2.68747	6.80895	-0.616913	-1.84457	0.00205	0.0250132	yes
ENSDARG00000063899	mt-nd2	MT:4992-6107	wt	mut	OK	65.7038	50.9099	116.614	-0.368032	-1.60062	0.00395	0.0408569	yes
ENSDARG00000058753	si:ch73-213k20.5	22:6913556-6931294	wt	mut	OK	0.596604	1.01901	1.61561	0.772315	1.5879	0.004	0.0411766	yes
ENSDARG00000086604	si:ch211-113a14.25	25:35817417-35817804	wt	mut	OK	428.949	332.038	760.987	-0.369458	-1.65183	0.0044	0.0442127	yes
ENSDARG00000010244	rpl22l1	24:26330140-26334800	wt	mut	OK	1290.75	998.942	2289.69	-0.369732	-1.77874	0.002	0.0245944	yes
ENSDARG00000058835	PLEKHG3	20:3132646-3183121	wt	mut	OK	2.05746	3.02027	5.07773	0.553812	1.69785	0.00285	0.03195	yes
ENSDARG00000057583	prrc2c	20:15127178-15181143	wt	mut	OK	19.1314	14.7939	33.9253	-0.370935	-1.70858	0.0027	0.0307074	yes
ENSDARG00000103339	si:ch211-193l2.5	11:41423595-41424874	wt	mut	OK	195.492	151.153	346.645	-0.371101	-1.78299	0.0025	0.0290455	yes
ENSDARG00000058946	CU856539.2	10:2573043-2641613	wt	mut	OK	2.15604	3.27327	5.42931	0.602348	1.8402	0.00175	0.0221517	yes
ENSDARG00000102832	baz1b	18:41570629-41601492	wt	mut	OK	34.5171	26.6254	61.1425	-0.374506	-1.78197	0.00165	0.0211497	yes
ENSDARG00000059039	mhc1ula	22:5328959-5344278	wt	mut	OK	3.34938	5.90013	9.24951	0.816851	2.18328	0.0002	0.00399838	yes
ENSDARG00000059059	emsy	10:284302-302856	wt	mut	OK	3.20137	5.65316	8.85453	0.820369	2.85819	5e-05	0.0012271	yes
ENSDARG00000009387	robo4	10:31358278-31408437	wt	mut	OK	17.3818	13.4004	30.7822	-0.375298	-1.6512	0.0041	0.0418812	yes
ENSDARG00000105359	si:ch1073-159d7.4	7:6331232-6331693	wt	mut	OK	1385.3	1067.74	2453.04	-0.375634	-1.80989	0.00135	0.0182536	yes
ENSDARG00000010238	rbm22	21:33155263-33196792	wt	mut	OK	24.7854	19.0803	43.8657	-0.377407	-1.67019	0.0032	0.0348326	yes
ENSDARG00000039547	si:ch211-113a14.22	25:35797406-35797781	wt	mut	OK	352.056	270.987	623.043	-0.377579	-1.64947	0.00475	0.046643	yes
ENSDARG00000102766	dennd4c	7:58766433-58853716	wt	mut	OK	7.9255	6.09953	14.025	-0.377803	-1.6532	0.00475	0.046643	yes
ENSDARG00000059125	prkacbb	2:2482328-2509720	wt	mut	OK	8.82173	6.78163	15.6034	-0.37943	-1.59024	0.00515	0.0492806	yes
ENSDARG00000004692	nabp1a	9:24403790-24407498	wt	mut	OK	68.3973	52.5684	120.966	-0.379744	-1.7068	0.0029	0.0323424	yes
ENSDARG00000059529	KIAA0895L	7:56433784-56445125	wt	mut	OK	0.641355	1.88325	2.52461	1.55403	2.74432	0.0002	0.00399838	yes
ENSDARG00000059567	si:ch73-281f12.4	3:58655433-58739508	wt	mut	OK	1.52479	3.54169	5.06648	1.21583	3.02698	5e-05	0.0012271	yes
ENSDARG00000059775	slc32a1	6:60147712-60152730	wt	mut	OK	0.517767	1.62118	2.13895	1.64667	3.5469	5e-05	0.0012271	yes
ENSDARG00000035598	coro1ca	5:19815718-19916063	wt	mut	OK	35.2365	27.073	62.3095	-0.380213	-1.81443	0.00205	0.0250132	yes
ENSDARG00000059817	mtmr12	5:40503843-40524125	wt	mut	OK	4.09869	2.34608	6.44477	-0.804909	-2.47178	5e-05	0.0012271	yes
ENSDARG00000105393	si:ch1073-159d7.6	7:6323201-6323664	wt	mut	OK	655.059	503.112	1158.17	-0.380747	-1.7969	0.00185	0.0231458	yes
ENSDARG00000070607	mrpl36	19:28699896-28705990	wt	mut	OK	24.0307	18.4499	42.4806	-0.381265	-1.61947	0.00495	0.0480058	yes
ENSDARG00000026829	cotl1	18:13235318-13248160	wt	mut	OK	75.4073	57.8453	133.253	-0.382505	-1.72169	0.003	0.0332214	yes
ENSDARG00000009212	ppiaa	8:45746991-45752208	wt	mut	OK	1787.94	1370.14	3158.08	-0.383977	-1.60587	0.0045	0.0448001	yes
ENSDARG00000059939	dab1a	20:8134953-8431318	wt	mut	OK	1.02173	2.27082	3.29255	1.1522	2.31368	5e-05	0.0012271	yes
ENSDARG00000060081	crb2b	8:2767881-2848406	wt	mut	OK	0.806371	1.77927	2.58564	1.14177	3.13809	5e-05	0.0012271	yes
ENSDARG00000063914	mt-nd3	MT:10589-11008	wt	mut	OK	1752.57	1342.4	3094.97	-0.384653	-1.85534	0.0014	0.0186807	yes
ENSDARG00000060126	acyp1	17:50165373-50168954	wt	mut	OK	0.36573	1.01435	1.38008	1.4717	2.02349	0.00325	0.0352878	yes
ENSDARG00000060197	atp2c1	16:41635612-41717069	wt	mut	OK	4.74424	3.28571	8.02995	-0.529973	-1.79658	0.00165	0.0211497	yes
ENSDARG00000060280	pde9a	9:19610726-19666379	wt	mut	OK	1.5665	0.654806	2.22131	-1.25841	-1.95452	0.00125	0.0172117	yes
ENSDARG00000102252	USP34	1:52932248-52992306	wt	mut	OK	7.12418	5.45601	12.5802	-0.384876	-1.73398	0.0031	0.0340231	yes
ENSDARG00000060452	sdk2b	12:37287354-37560231	wt	mut	OK	2.28991	1.59857	3.88848	-0.51851	-1.79647	0.0021	0.0254612	yes
ENSDARG00000017365	slc23a2	8:42910727-42979902	wt	mut	OK	11.0619	8.47037	19.5323	-0.385097	-1.62413	0.0051	0.0489651	yes
ENSDARG00000031317	ppdpfb	23:17501494-17503432	wt	mut	OK	164.325	125.494	289.819	-0.388935	-1.7884	0.0016	0.0207088	yes
ENSDARG00000094744	si:ch211-113a14.15	25:35784227-35784648	wt	mut	OK	2766.51	2111.6	4878.11	-0.389729	-1.87975	0.00085	0.0128191	yes
ENSDARG00000060751	taok3a	5:14859977-14993966	wt	mut	OK	0.96504	1.69261	2.65765	0.810591	2.12774	0.0003	0.00565055	yes
ENSDARG00000060766	PXN	8:3391492-3460600	wt	mut	OK	5.80664	3.15593	8.96257	-0.879639	-2.52547	5e-05	0.0012271	yes
ENSDARG00000044972	bcap31	8:8934839-8990590	wt	mut	OK	49.0223	37.3941	86.4164	-0.390628	-1.63487	0.00495	0.0480058	yes
ENSDARG00000036162	hnrnpa0b	14:38505189-38507852	wt	mut	OK	103.344	78.82	182.164	-0.390819	-1.75483	0.0017	0.0216618	yes
ENSDARG00000011020	hnrnpa1a	11:2029520-2227366	wt	mut	OK	85.3951	65.0265	150.422	-0.393126	-1.6584	0.00345	0.0368791	yes
ENSDARG00000045167	dlgap5	12:17498192-17533809	wt	mut	OK	46.5085	35.3783	81.8868	-0.394629	-1.71291	0.0031	0.0340231	yes
ENSDARG00000093195	si:dkey-261m9.6	25:34627131-34627506	wt	mut	OK	1443.71	1098.19	2541.9	-0.394655	-1.89325	0.001	0.0144983	yes
ENSDARG00000061260	si:dkey-202e22.2	11:34498634-34521945	wt	mut	OK	0.738815	2.02717	2.76598	1.45618	2.35928	0.0002	0.00399838	yes
ENSDARG00000078686	arl8a	22:673035-680892	wt	mut	OK	17.1725	13.0455	30.218	-0.396544	-1.67281	0.0042	0.042525	yes
ENSDARG00000105431	si:dkey-23a13.9	7:5790022-5790727	wt	mut	OK	112.582	85.4593	198.041	-0.397666	-1.71683	0.00275	0.031112	yes
ENSDARG00000102011	Metazoa_SRP	11:12179130-12179427	wt	mut	OK	5545.73	4207.25	9752.98	-0.398499	-1.9169	0.00085	0.0128191	yes
ENSDARG00000061417	nub1	24:41409786-41439804	wt	mut	OK	1.99338	0.422699	2.41608	-2.23752	-2.62165	5e-05	0.0012271	yes
ENSDARG00000061439	ugt5c3	18:40481633-40487673	wt	mut	OK	2.34335	5.27607	7.61942	1.17089	3.52549	5e-05	0.0012271	yes
ENSDARG00000061479	thsd7aa	19:38033292-38256283	wt	mut	OK	2.08962	3.10605	5.19567	0.571837	2.00139	0.0006	0.00968363	yes
ENSDARG00000061549	foxo1b	10:31865365-31917614	wt	mut	OK	1.12993	2.43404	3.56397	1.10712	2.42497	0.0001	0.00224065	yes
ENSDARG00000055373	sema3fb	11:35186567-35313808	wt	mut	OK	5.97907	4.53462	10.5137	-0.39894	-1.60774	0.00505	0.0486475	yes
ENSDARG00000061602	ssx2ipb	22:24686570-24697095	wt	mut	OK	0.826294	1.58476	2.41105	0.939538	1.6869	0.00405	0.0414933	yes
ENSDARG00000061664	zgc:162707	9:12433917-12453591	wt	mut	OK	0.275922	1.55794	1.83386	2.49731	2.15504	0.00145	0.0191553	yes
ENSDARG00000061830	prss12	1:19376400-19449424	wt	mut	OK	1.14794	0.747736	1.89568	-0.618448	-1.65257	0.00415	0.0422918	yes
ENSDARG00000099104	rpl24	1:6407-16373	wt	mut	OK	2322.4	1761.27	4083.67	-0.399	-1.74632	0.0023	0.0272167	yes
ENSDARG00000061916	tmem51b	11:25595602-25615596	wt	mut	OK	1.60404	2.8504	4.45444	0.829457	1.72164	0.00405	0.0414933	yes
ENSDARG00000061963	vrtn	20:27850042-27855924	wt	mut	OK	1.1041	1.86552	2.96962	0.756707	1.88671	0.00165	0.0211497	yes
ENSDARG00000039225	vps13a	8:52005807-52105234	wt	mut	OK	5.73291	4.33841	10.0713	-0.4021	-1.75639	0.00255	0.0294479	yes
ENSDARG00000062040	atp8b5a	5:18740498-18792646	wt	mut	OK	5.71435	3.5144	9.22875	-0.701311	-2.57169	5e-05	0.0012271	yes
ENSDARG00000007960	hnrnpaba	14:6655543-6661862	wt	mut	OK	97.6411	73.8546	171.496	-0.4028	-1.61085	0.0049	0.047628	yes
ENSDARG00000010408	igsf9b	8:4797694-4904043	wt	mut	OK	7.07486	5.34956	12.4244	-0.403281	-1.76294	0.00205	0.0250132	yes
ENSDARG00000062195	fbxo31	25:21763197-21796769	wt	mut	OK	1.91044	3.40024	5.31068	0.831727	2.01201	0.00065	0.0102791	yes
ENSDARG00000062217	kcnj3b	6:13042486-13075278	wt	mut	OK	0.320579	0.945108	1.26569	1.5598	3.04267	5e-05	0.0012271	yes
ENSDARG00000062314	rasl10a	5:24219604-24246486	wt	mut	OK	2.95323	0.907206	3.86044	-1.70279	-2.06194	0.0045	0.0448001	yes
ENSDARG00000092467	si:ch73-46j18.5	10:1680370-1690649	wt	mut	OK	48.5235	36.6508	85.1743	-0.404838	-1.95257	0.00065	0.0102791	yes
ENSDARG00000062562	egln2	15:8359528-8406926	wt	mut	OK	1.20519	2.63882	3.84401	1.13063	2.98177	5e-05	0.0012271	yes
ENSDARG00000062721	dennd4a	18:19055772-19106104	wt	mut	OK	2.61387	1.61616	4.23003	-0.693613	-2.22193	0.0002	0.00399838	yes
ENSDARG00000062788	irg1l	14:11121037-11124596	wt	mut	OK	2.09415	4.16665	6.2608	0.992522	2.27264	5e-05	0.0012271	yes
ENSDARG00000077531	bag6l	19:30887768-30923600	wt	mut	OK	11.898	8.98317	20.8812	-0.405418	-1.69189	0.00295	0.0327308	yes
ENSDARG00000096992	zgc:153405	25:34648324-34649027	wt	mut	OK	256.658	193.751	450.409	-0.405643	-1.90591	0.0009	0.0133859	yes
ENSDARG00000008490	ltv1	1:53205933-53220896	wt	mut	OK	29.1153	21.9782	51.0935	-0.405701	-1.7672	0.002	0.0245944	yes
ENSDARG00000063195	pxk	22:10136594-10169385	wt	mut	OK	3.76706	2.71577	6.48283	-0.472078	-1.64705	0.0045	0.0448001	yes
ENSDARG00000063300	si:ch1073-385i9.2	16:52039523-52090962	wt	mut	OK	3.85027	2.59194	6.44221	-0.570927	-2.02393	0.00035	0.00635637	yes
ENSDARG00000030408	rps26l	6:49522052-49527658	wt	mut	OK	1146.03	864.964	2010.99	-0.405927	-1.95667	0.0007	0.0109792	yes
ENSDARG00000063361	si:ch211-1e14.1	18:12395817-12484832	wt	mut	OK	3.39938	1.86128	5.26066	-0.868975	-2.75406	5e-05	0.0012271	yes
ENSDARG00000063375	pter	2:3772409-3785184	wt	mut	OK	6.16478	2.66448	8.82926	-1.21019	-2.85703	5e-05	0.0012271	yes
ENSDARG00000063436	RPH3A (1 of many)	10:3481034-3514892	wt	mut	OK	0.0876212	1.15473	1.24235	3.72013	5.69801	5e-05	0.0012271	yes
ENSDARG00000100906	si:dkey-23a13.20	7:5853546-5854344	wt	mut	OK	616.763	465.494	1082.26	-0.405952	-1.95772	0.0005	0.00833478	yes
ENSDARG00000042069	pebp1	5:14850736-14857602	wt	mut	OK	36.2451	27.332	63.5771	-0.407197	-1.69207	0.00345	0.0368791	yes
ENSDARG00000073723	zgc:194679	7:56375647-56381503	wt	mut	OK	11.4232	8.60685	20.03	-0.408415	-1.63503	0.00395	0.0408569	yes
ENSDARG00000037178	zic2b	1:29027827-29056964	wt	mut	OK	62.476	47.0482	109.524	-0.409165	-1.9211	0.0008	0.012247	yes
ENSDARG00000063684	ppm1h	25:1511318-1544329	wt	mut	OK	2.29456	0.7206	3.01516	-1.67095	-3.33034	5e-05	0.0012271	yes
ENSDARG00000063690	nrm	19:816398-822466	wt	mut	OK	2.97892	4.46892	7.44784	0.585136	1.98987	0.00065	0.0102791	yes
ENSDARG00000105340	si:ch1073-153i20.3	7:6292761-6293214	wt	mut	OK	1053.45	793.222	1846.67	-0.409325	-1.97486	0.0003	0.00565055	yes
ENSDARG00000013861	armc1	24:24556605-24579110	wt	mut	OK	22.3546	16.8205	39.1751	-0.410347	-1.68942	0.00315	0.034375	yes
ENSDARG00000008805	orc3	17:49230528-49256706	wt	mut	OK	62.3894	46.9217	109.311	-0.411045	-1.86385	0.0007	0.0109792	yes
ENSDARG00000059070	gars	24:20391636-20410550	wt	mut	OK	159.076	119.619	278.695	-0.411271	-1.9914	0.00085	0.0128191	yes
ENSDARG00000044914	suclg2	11:16603543-16840555	wt	mut	OK	14.4985	10.8936	25.3921	-0.412413	-1.64134	0.0046	0.0456114	yes
ENSDARG00000006514	her6	6:36573188-36574950	wt	mut	OK	59.2885	44.5411	103.83	-0.412617	-1.80104	0.00245	0.02858	yes
ENSDARG00000067668	CABZ01073329.1	15:47637146-47643338	wt	mut	OK	4.21213	2.35564	6.56777	-0.838433	-2.17437	0.00015	0.00315604	yes
ENSDARG00000077256	nat8l	7:24186033-24201834	wt	mut	OK	23.6185	17.7393	41.3578	-0.412974	-1.94404	0.0009	0.0133859	yes
ENSDARG00000067912	si:ch73-373m9.1	16:52212433-52334068	wt	mut	OK	4.32112	1.11977	5.44089	-1.94821	-2.51356	0.00275	0.031112	yes
ENSDARG00000038834	etfdh	14:49083114-49115450	wt	mut	OK	27.1742	20.3994	47.5736	-0.413708	-1.64968	0.00445	0.0445336	yes
ENSDARG00000068179	trib2	20:45531766-45550328	wt	mut	OK	4.51969	2.78404	7.30373	-0.699041	-2.3933	5e-05	0.0012271	yes
ENSDARG00000068193	tmem44	11:33938750-33956779	wt	mut	OK	1.10943	0.370173	1.4796	-1.58355	-2.16322	0.00205	0.0250132	yes
ENSDARG00000022232	ppan	3:54299328-54313359	wt	mut	OK	34.0623	25.5438	59.6061	-0.415201	-1.81108	0.00225	0.0267534	yes
ENSDARG00000068250	si:ch211-151h10.2	18:44309698-44323466	wt	mut	OK	0.531502	2.6573	3.1888	2.32181	3.6595	5e-05	0.0012271	yes
ENSDARG00000018404	krt18	23:10412880-10416784	wt	mut	OK	855.011	640.539	1495.55	-0.416658	-1.638	0.00445	0.0445336	yes
ENSDARG00000068323	astn1	2:34589764-34999969	wt	mut	OK	1.72931	0.506359	2.23567	-1.77196	-2.32203	0.0001	0.00224065	yes
ENSDARG00000042094	eef2a.1	22:20110416-20130342	wt	mut	OK	54.031	40.4542	94.4852	-0.4175	-1.95678	0.0005	0.00833478	yes
ENSDARG00000068701	gpr85	4:6634850-6639035	wt	mut	OK	0.295623	0.963189	1.25881	1.70406	2.8465	5e-05	0.0012271	yes
ENSDARG00000068726	masp1	15:36329470-36365888	wt	mut	OK	0.603121	1.86942	2.47254	1.63207	1.84708	0.00065	0.0102791	yes
ENSDARG00000068729	eif2ak2	13:49894507-49921052	wt	mut	OK	0.829383	0.338213	1.1676	-1.2941	-1.77633	0.00215	0.025958	yes
ENSDARG00000068814	spata2l	18:14715602-14719926	wt	mut	OK	4.28421	2.81428	7.09849	-0.606265	-1.74324	0.00295	0.0327308	yes
ENSDARG00000070658	zbtb12.2	19:27372134-27380125	wt	mut	OK	13.3672	10.0042	23.3714	-0.418094	-1.63869	0.0043	0.0433594	yes
ENSDARG00000044692	eri1	21:19871122-19879385	wt	mut	OK	21.2345	15.8853	37.1198	-0.418725	-1.68193	0.0036	0.0380348	yes
ENSDARG00000068934	cyp1b1	13:41885314-41892978	wt	mut	OK	1.02983	3.185	4.21483	1.62889	4.09569	5e-05	0.0012271	yes
ENSDARG00000054164	mrps17	21:37726359-37733658	wt	mut	OK	66.0175	49.3607	115.378	-0.419485	-1.65581	0.0039	0.0405831	yes
ENSDARG00000068966	si:ch211-261n11.7	8:22456850-22468746	wt	mut	OK	1.77369	0	1.77369	#NAME?	#NAME?	5e-05	0.0012271	yes
ENSDARG00000070084	phf10	13:5850331-5873506	wt	mut	OK	40.1626	30.0283	70.1909	-0.419529	-1.82973	0.00115	0.0161047	yes
ENSDARG00000087854	si:dkey-108k21.13	25:34553129-34553504	wt	mut	OK	472.415	352.883	825.298	-0.420866	-1.89949	0.0015	0.0196952	yes
ENSDARG00000032637	si:dkey-261m9.12	25:34636569-34637169	wt	mut	OK	600.236	448.153	1048.39	-0.421537	-2.03034	0.00045	0.00770223	yes
ENSDARG00000069171	gramd4a	4:28072420-28169047	wt	mut	OK	0.429764	0.83535	1.26511	0.958838	1.88978	0.00195	0.0241864	yes
ENSDARG00000069189	si:dkey-242h9.3	18:19131913-19139062	wt	mut	OK	2.38912	5.92657	8.31569	1.31072	2.52118	0.0002	0.00399838	yes
ENSDARG00000056678	trim47	10:26156408-26166466	wt	mut	OK	25.4101	18.9578	44.3679	-0.422613	-1.91415	0.001	0.0144983	yes
ENSDARG00000069264	si:ch211-196h16.5	1:54156421-54211850	wt	mut	OK	0.293606	1.04656	1.34017	1.8337	2.35371	0.00145	0.0191553	yes
ENSDARG00000061180	vps45	19:42827849-42847259	wt	mut	OK	11.496	8.56466	20.0607	-0.42466	-1.62602	0.00495	0.0480058	yes
ENSDARG00000102753	si:dkey-109l4.3	14:44308051-44312552	wt	mut	OK	44.6364	33.2531	77.8895	-0.424733	-1.96268	0.0008	0.012247	yes
ENSDARG00000030694	atp6v1e1b	4:5216981-5238765	wt	mut	OK	26.0289	19.379	45.4079	-0.425625	-1.6659	0.0038	0.0396621	yes
ENSDARG00000067958	sh3gl1a	2:49723395-49777228	wt	mut	OK	16.808	12.5094	29.3174	-0.426132	-1.63546	0.0038	0.0396621	yes
ENSDARG00000042344	trmt6	20:45850602-45868586	wt	mut	OK	22.8922	17.0288	39.921	-0.426881	-1.73469	0.00305	0.0336026	yes
ENSDARG00000063908	mt-co2	MT:8129-8820	wt	mut	OK	2502.01	1860.47	4362.48	-0.427421	-1.98518	0.00075	0.0116365	yes
ENSDARG00000101259	hgh1	19:2803374-2814534	wt	mut	OK	22.7072	16.8796	39.5868	-0.427868	-1.67013	0.004	0.0411766	yes
ENSDARG00000037361	kdelr2b	12:947208-954562	wt	mut	OK	41.1596	30.5941	71.7537	-0.427974	-1.83108	0.00165	0.0211497	yes
ENSDARG00000069548	zgc:162780	9:28882845-28886253	wt	mut	OK	4.18388	1.10342	5.2873	-1.92286	-3.4345	5e-05	0.0012271	yes
ENSDARG00000076239	si:ch211-74f19.2	7:8644407-8715983	wt	mut	OK	54.9998	40.8222	95.822	-0.430075	-2.07411	0.00015	0.00315604	yes
ENSDARG00000069823	proca1	15:15509090-15513907	wt	mut	OK	1.04951	1.99199	3.0415	0.924495	2.2786	0.00015	0.00315604	yes
ENSDARG00000079687	rnf10	8:41252760-41266135	wt	mut	OK	117.887	87.4571	205.344	-0.430754	-1.91226	0.00045	0.00770223	yes
ENSDARG00000070000	txnipb	16:42965295-42968883	wt	mut	OK	0.789532	2.68701	3.47654	1.76693	3.48503	5e-05	0.0012271	yes
ENSDARG00000021021	trim35-28	16:26566075-26572879	wt	mut	OK	28.9579	21.4806	50.4385	-0.430923	-1.51062	0.00445	0.0445336	yes
ENSDARG00000003699	atp7a	14:22100127-22144814	wt	mut	OK	10.0243	7.43392	17.4582	-0.431301	-1.82444	0.0013	0.0177164	yes
ENSDARG00000070029	ehhadh	9:12457022-12472523	wt	mut	OK	1.25526	4.87236	6.12762	1.95664	5.01948	5e-05	0.0012271	yes
ENSDARG00000070039	si:dkey-30k22.8	1:25018983-25020974	wt	mut	OK	0	0.7782	0.7782	inf	#NAME?	5e-05	0.0012271	yes
ENSDARG00000004189	cbx1a	3:23804333-23941034	wt	mut	OK	70.6473	52.3839	123.031	-0.431511	-1.9969	0.0003	0.00565055	yes
ENSDARG00000070050	sfrp2	1:24800494-24805304	wt	mut	OK	2.13733	0.901886	3.03922	-1.24479	-2.03742	0.00135	0.0182536	yes
ENSDARG00000071601	pvalb9	12:17574232-17576643	wt	mut	OK	60.6279	44.9512	105.579	-0.431622	-1.68583	0.0038	0.0396621	yes
ENSDARG00000028119	sumo3a	6:10834833-10838453	wt	mut	OK	117.291	86.9551	204.246	-0.431748	-1.97266	0.0008	0.012247	yes
ENSDARG00000070124	ptpn23a	16:41162313-41181546	wt	mut	OK	5.28273	3.26564	8.54837	-0.693918	-2.76028	5e-05	0.0012271	yes
ENSDARG00000070140	RETSAT (1 of many)	3:39049956-39056255	wt	mut	OK	0.771738	0.325451	1.09719	-1.24567	-1.8745	0.0026	0.0298455	yes
ENSDARG00000070141	si:ch211-191i18.2	19:42693635-42721918	wt	mut	OK	1.84478	3.37808	5.22286	0.872754	1.64921	0.0036	0.0380348	yes
ENSDARG00000070266	spock3	1:19941997-20013359	wt	mut	OK	3.28916	6.59352	9.88268	1.00333	2.43858	5e-05	0.0012271	yes
ENSDARG00000010132	dacha	21:34329965-34623776	wt	mut	OK	12.5862	9.32985	21.916	-0.431917	-1.68976	0.0022	0.0263587	yes
ENSDARG00000070465	si:dkey-13n23.3	3:30370125-30373577	wt	mut	OK	4.13548	2.37168	6.50716	-0.802144	-2.1834	5e-05	0.0012271	yes
ENSDARG00000095863	afp4	16:45947763-45950606	wt	mut	OK	476.523	353.075	829.598	-0.432572	-1.92322	0.00095	0.0139255	yes
ENSDARG00000080337	AC024175.4	MT:2042-3725	wt	mut	OK	1143.63	847.195	1990.83	-0.43285	-1.95726	0.00085	0.0128191	yes
ENSDARG00000090230	tmem108	24:9603625-9732820	wt	mut	OK	16.9375	12.5467	29.4842	-0.43291	-1.75366	0.00225	0.0267534	yes
ENSDARG00000021346	pdhb	22:10172143-10182820	wt	mut	OK	61.6015	45.5726	107.174	-0.4348	-1.94219	0.00045	0.00770223	yes
ENSDARG00000070604	zgc:162509	16:14075802-14086815	wt	mut	OK	0.291529	1.03215	1.32368	1.82394	2.8203	5e-05	0.0012271	yes
ENSDARG00000004706	syf2	13:45294755-45306104	wt	mut	OK	64.768	47.8957	112.664	-0.435386	-1.86803	0.00115	0.0161047	yes
ENSDARG00000070625	enpp5	20:18821727-18836698	wt	mut	OK	3.81172	2.73159	6.54331	-0.480701	-1.62	0.0046	0.0456114	yes
ENSDARG00000017049	adsl	3:24076694-24088079	wt	mut	OK	46.5302	34.3722	80.9024	-0.436922	-1.94468	0.0008	0.012247	yes
ENSDARG00000087950	IWS1	15:46398783-46439142	wt	mut	OK	9.40533	6.94394	16.3493	-0.437724	-1.66346	0.00425	0.0429808	yes
ENSDARG00000070705	zgc:64022	19:24539185-24541234	wt	mut	OK	0.342973	1.10021	1.44318	1.68161	2.16785	0.00225	0.0267534	yes
ENSDARG00000070713	prss60.1	6:39088432-39093794	wt	mut	OK	1.31753	2.55557	3.8731	0.955811	1.92253	0.00155	0.0201828	yes
ENSDARG00000022712	stat3	3:16880864-16957645	wt	mut	OK	25.5171	18.8334	44.3505	-0.438176	-1.95432	0.00045	0.00770223	yes
ENSDARG00000074166	birc6	17:22567519-22721893	wt	mut	OK	10.4695	7.71181	18.1813	-0.441049	-2.07279	0.0004	0.00703486	yes
ENSDARG00000061328	cdon	18:44059597-44135697	wt	mut	OK	38.5164	28.3656	66.882	-0.441331	-1.88072	0.0013	0.0177164	yes
ENSDARG00000071021	papss2a	17:23661061-23689323	wt	mut	OK	1.66547	0.286263	1.95173	-2.54052	-4.29844	5e-05	0.0012271	yes
ENSDARG00000071024	zgc:171679	22:30553359-30625531	wt	mut	OK	2.83193	5.21854	8.05047	0.88186	2.0994	0.0004	0.00703486	yes
ENSDARG00000020625	jak1	6:31381156-31442247	wt	mut	OK	17.2647	12.7127	29.9774	-0.441549	-1.86335	0.0014	0.0186807	yes
ENSDARG00000071288	samhd1	23:513708-533149	wt	mut	OK	4.4712	2.75528	7.22648	-0.698467	-2.18718	0.00035	0.00635637	yes
ENSDARG00000098280	rbm5	6:53264089-53282216	wt	mut	OK	87.3527	64.247	151.6	-0.443223	-1.70134	0.00375	0.0392828	yes
ENSDARG00000025404	ube2g2	6:8362888-8373856	wt	mut	OK	26.641	19.5903	46.2313	-0.443505	-1.77241	0.00205	0.0250132	yes
ENSDARG00000092743	si:dkey-108k21.17	25:34562359-34562734	wt	mut	OK	790.142	579.736	1369.88	-0.446717	-2.08677	0.0002	0.00399838	yes
ENSDARG00000010728	scin	19:31754709-31785583	wt	mut	OK	17.224	12.6296	29.8536	-0.447609	-1.79224	0.00175	0.0221517	yes
ENSDARG00000014790	g3bp2	1:25751271-25771715	wt	mut	OK	24.7123	18.1131	42.8254	-0.448199	-2.05366	0.00035	0.00635637	yes
ENSDARG00000071581	si:ch211-222k6.1	22:10015140-10021719	wt	mut	OK	2.58008	1.43873	4.01881	-0.84262	-1.73003	0.002	0.0245944	yes
ENSDARG00000036080	cd81a	7:32712289-32752254	wt	mut	OK	166.399	121.938	288.337	-0.4485	-1.68431	0.0045	0.0448001	yes
ENSDARG00000071590	si:ch211-236g6.1	22:9777184-9784454	wt	mut	OK	5.1246	0	5.1246	#NAME?	#NAME?	5e-05	0.0012271	yes
ENSDARG00000077456	si:ch211-113a14.12	25:35777314-35778185	wt	mut	OK	125.38	91.8729	217.253	-0.448595	-2.03808	0.0005	0.00833478	yes
ENSDARG00000052164	znf507	7:46953012-46993072	wt	mut	OK	10.9201	7.99489	18.915	-0.449837	-1.85601	0.0013	0.0177164	yes
ENSDARG00000074451	mnd1	1:24487276-24525406	wt	mut	OK	68.2154	49.9267	118.142	-0.450287	-1.95367	0.0008	0.012247	yes
ENSDARG00000071724	ankha	24:10208760-10253891	wt	mut	OK	2.17006	0.7563	2.92636	-1.52071	-2.7302	5e-05	0.0012271	yes
ENSDARG00000099298	xrcc5	9:53018678-53058160	wt	mut	OK	56.6795	41.4711	98.1506	-0.45072	-2.05225	0.0003	0.00565055	yes
ENSDARG00000013078	ywhaba	6:52212574-52225290	wt	mut	OK	116.496	85.1522	201.648	-0.452165	-2.02423	0.00065	0.0102791	yes
ENSDARG00000073716	cpxm1a	13:9243492-9276920	wt	mut	OK	1.69981	2.69043	4.39024	0.662463	1.68764	0.0044	0.0442127	yes
ENSDARG00000017397	smarcc1a	16:42519771-42557505	wt	mut	OK	31.6302	23.1184	54.7486	-0.452265	-2.12828	0.00025	0.0048518	yes
ENSDARG00000040725	zgc:114130	15:14098296-14102270	wt	mut	OK	66.6874	48.7368	115.424	-0.452401	-2.15284	0.0002	0.00399838	yes
ENSDARG00000073784	FEZ2 (1 of many)	16:2582695-2595930	wt	mut	OK	1.25429	2.38754	3.64183	0.928656	1.72197	0.00285	0.03195	yes
ENSDARG00000073799	zgc:194210	16:31470560-31477093	wt	mut	OK	2.36242	1.05529	3.41771	-1.16263	-1.70867	0.0023	0.0272167	yes
ENSDARG00000095427	si:ch211-152p11.8	19:27879710-27885039	wt	mut	OK	79.7735	58.2763	138.05	-0.452999	-1.67465	0.00315	0.034375	yes
ENSDARG00000073859	kif13bb	20:50012475-50089891	wt	mut	OK	2.10518	1.37846	3.48364	-0.610883	-2.05157	0.0004	0.00703486	yes
ENSDARG00000073893	dnase2	16:45370946-45390802	wt	mut	OK	2.72101	4.2092	6.93021	0.629405	2.03679	0.00025	0.0048518	yes
ENSDARG00000078974	COA4	10:36254209-36256293	wt	mut	OK	74.1623	54.1472	128.31	-0.453799	-1.67768	0.00405	0.0414933	yes
ENSDARG00000073918	rnf41l	16:26847295-26858486	wt	mut	OK	0.200509	0.972339	1.17285	2.27779	1.90603	0.0028	0.0315741	yes
ENSDARG00000006300	psmd9	7:71757230-71765097	wt	mut	OK	78.5266	57.326	135.853	-0.453991	-1.98438	0.00075	0.0116365	yes
ENSDARG00000078983	fam118b	18:44802257-44827292	wt	mut	OK	39.5251	28.8513	68.3764	-0.454134	-1.70514	0.0029	0.0323424	yes
ENSDARG00000074085	si:ch1073-188e1.1	22:6752249-6772350	wt	mut	OK	1.98032	0.546617	2.52694	-1.85713	-2.20796	5e-05	0.0012271	yes
ENSDARG00000074094	tgm2b	6:1959700-1988145	wt	mut	OK	4.79713	2.75755	7.55468	-0.798784	-2.07712	0.0004	0.00703486	yes
ENSDARG00000001769	ptpra	21:15660571-15720340	wt	mut	OK	8.85936	6.44693	15.3063	-0.458591	-1.81837	0.00155	0.0201828	yes
ENSDARG00000074258	GRAMD1B (1 of many)	18:46842583-47026438	wt	mut	OK	0.981493	0.386189	1.36768	-1.34567	-2.58432	0.0001	0.00224065	yes
ENSDARG00000017140	zgc:63587	8:4564975-4638223	wt	mut	OK	61.4476	44.7105	106.158	-0.458743	-2.0983	0.0005	0.00833478	yes
ENSDARG00000074371	tirap	18:48756785-48760269	wt	mut	OK	1.46199	3.66416	5.12615	1.32555	2.23721	0.0005	0.00833478	yes
ENSDARG00000101846	FASTKD5	5:2435437-2438162	wt	mut	OK	6.68701	4.85798	11.545	-0.461004	-1.60279	0.00475	0.046643	yes
ENSDARG00000090116	znf1136	4:40411456-40418191	wt	mut	OK	16.0409	11.6519	27.6928	-0.461183	-1.77789	0.0018	0.0226351	yes
ENSDARG00000105300	BX927081.1	6:24196239-24200325	wt	mut	OK	6.00487	4.3617	10.3666	-0.461242	-1.72405	0.0026	0.0298455	yes
ENSDARG00000035573	AK6	5:25599383-25603092	wt	mut	OK	77.6567	56.4046	134.061	-0.461298	-2.05263	0.00065	0.0102791	yes
ENSDARG00000102937	hspbp1	3:13450867-13468536	wt	mut	OK	25.9468	18.831	44.7778	-0.462445	-1.92191	0.0012	0.0166562	yes
ENSDARG00000074558	cntnap2b	2:50542524-50638237	wt	mut	OK	2.39448	3.58199	5.97647	0.581046	1.94596	0.0008	0.012247	yes
ENSDARG00000074622	myo5ab	25:7438092-7475262	wt	mut	OK	0.708138	1.65478	2.36292	1.22454	3.30284	5e-05	0.0012271	yes
ENSDARG00000026701	gtf2h1	25:3071110-3091371	wt	mut	OK	15.0351	10.9059	25.941	-0.463233	-1.86996	0.0013	0.0177164	yes
ENSDARG00000074663	SAMD8	17:20549969-20573122	wt	mut	OK	2.94562	1.33707	4.28269	-1.1395	-2.67377	5e-05	0.0012271	yes
ENSDARG00000074669	cacng4b	3:60845468-60866416	wt	mut	OK	0.424729	0.973463	1.39819	1.19658	1.93155	0.0013	0.0177164	yes
ENSDARG00000063672	TULP3	4:1619905-1640099	wt	mut	OK	7.18549	5.21059	12.3961	-0.46364	-1.75587	0.00265	0.0302985	yes
ENSDARG00000056029	cyp26c1	17:19493734-19515492	wt	mut	OK	23.3285	16.9123	40.2408	-0.46402	-2.10533	0.0002	0.00399838	yes
ENSDARG00000036028	arrdc3b	10:43914682-43924650	wt	mut	OK	13.4652	9.76073	23.2259	-0.464174	-1.88096	0.0011	0.0155943	yes
ENSDARG00000074773	si:dkey-110g7.8	3:24071407-24074791	wt	mut	OK	2.00956	0.175933	2.18549	-3.51378	-3.95888	0.0001	0.00224065	yes
ENSDARG00000074781	ptprt	6:51180106-51386657	wt	mut	OK	2.90482	1.79064	4.69546	-0.697975	-1.73037	0.00285	0.03195	yes
ENSDARG00000074815	mxra5a	1:32589528-32600676	wt	mut	OK	0.561268	1.17975	1.74102	1.07172	1.90099	0.0009	0.0133859	yes
ENSDARG00000074828	RHOBTB2 (1 of many)	8:50504385-50518777	wt	mut	OK	0.894129	0.243117	1.13725	-1.87883	-1.87178	0.0021	0.0254612	yes
ENSDARG00000101507	ATG2A	14:8512750-8584888	wt	mut	OK	6.42612	4.65562	11.0817	-0.464974	-1.92625	0.00055	0.00903729	yes
ENSDARG00000013076	bmi1b	2:21506867-21512465	wt	mut	OK	10.7036	7.7513	18.4549	-0.465586	-1.62136	0.00485	0.0472485	yes
ENSDARG00000074902	nol4la	8:23231610-23307025	wt	mut	OK	1.56397	2.5461	4.11007	0.703082	1.93865	0.00135	0.0182536	yes
ENSDARG00000074908	col6a1	11:33733723-33802916	wt	mut	OK	0.35821	1.27272	1.63093	1.82903	3.22152	5e-05	0.0012271	yes
ENSDARG00000074301	cth	6:37431663-37444947	wt	mut	OK	59.3866	42.9583	102.345	-0.4672	-2.15004	0.0001	0.00224065	yes
ENSDARG00000075121	hbegfa	14:6742202-6745213	wt	mut	OK	0.714203	3.62266	4.33686	2.34264	3.90208	5e-05	0.0012271	yes
ENSDARG00000075133	adgrb1a	16:37548980-37678464	wt	mut	OK	0.558879	1.04005	1.59893	0.896047	1.60524	0.00455	0.0452196	yes
ENSDARG00000075215	vetz	4:25923230-25958213	wt	mut	OK	5.32905	3.61293	8.94198	-0.56071	-1.62039	0.00245	0.02858	yes
ENSDARG00000075225	si:ch211-223a10.1	13:30939806-30961921	wt	mut	OK	2.13561	4.12873	6.26434	0.95105	1.71319	0.0028	0.0315741	yes
ENSDARG00000075269	si:dkey-20i10.7	13:12356387-12362100	wt	mut	OK	4.12779	2.2663	6.39409	-0.865031	-1.95828	0.0012	0.0166562	yes
ENSDARG00000038847	gins3	25:13303566-13374890	wt	mut	OK	34.8642	25.2179	60.0821	-0.467296	-1.74789	0.00225	0.0267534	yes
ENSDARG00000075433	myom2a	11:11217474-11277249	wt	mut	OK	2.08531	0.345524	2.43083	-2.59341	-1.05124	0.004	0.0411766	yes
ENSDARG00000075463	mss51	24:39213355-39222136	wt	mut	OK	2.14247	0.816927	2.9594	-1.391	-2.51243	0.0002	0.00399838	yes
ENSDARG00000036820	mgll	8:26273420-26307362	wt	mut	OK	23.0555	16.6684	39.7239	-0.467998	-2.01346	0.0005	0.00833478	yes
ENSDARG00000039601	ier3ip1	10:14584651-14587495	wt	mut	OK	50.5813	36.5083	87.0896	-0.47038	-1.86255	0.00155	0.0201828	yes
ENSDARG00000105352	si:dkey-23a13.7	7:5787623-5788029	wt	mut	OK	3558.88	2568.51	6127.39	-0.470492	-2.25292	0.00015	0.00315604	yes
ENSDARG00000075521	cpz	1:40098908-40116113	wt	mut	OK	3.56656	5.36896	8.93552	0.590111	1.91468	0.00115	0.0161047	yes
ENSDARG00000039649	mtif3	5:67293915-67301032	wt	mut	OK	21.4836	15.4929	36.9765	-0.471625	-1.65115	0.0036	0.0380348	yes
ENSDARG00000058560	adrm1	23:9626020-9632336	wt	mut	OK	35.382	25.5072	60.8892	-0.472112	-1.77635	0.0019	0.0236342	yes
ENSDARG00000075597	flrt1b	14:46802161-47010338	wt	mut	OK	0.578606	0.939496	1.5181	0.699305	1.70958	0.0042	0.042525	yes
ENSDARG00000076381	slc25a1b	10:3269206-3294896	wt	mut	OK	24.5568	17.7015	42.2583	-0.472255	-1.78669	0.0021	0.0254612	yes
ENSDARG00000075618	slc36a1	14:25689649-25770627	wt	mut	OK	2.82059	1.63187	4.45246	-0.78947	-2.39696	0.00025	0.0048518	yes
ENSDARG00000039142	arpc5a	2:21309610-21317616	wt	mut	OK	42.3298	30.5037	72.8335	-0.47269	-2.22098	0.0001	0.00224065	yes
ENSDARG00000075748	NCKAP1L	11:170967-197220	wt	mut	OK	3.34081	1.09708	4.43789	-1.60653	-2.33371	0.0004	0.00703486	yes
ENSDARG00000075849	prr12b	3:32293487-32340441	wt	mut	OK	2.15078	1.35457	3.50535	-0.667028	-1.83974	0.00235	0.0276566	yes
ENSDARG00000075915	si:ch73-70k4.1	8:17493438-17499319	wt	mut	OK	2.69346	6.8146	9.50806	1.33917	2.16512	0.00105	0.0150587	yes
ENSDARG00000075943	si:ch211-250c4.5	13:7940019-7947510	wt	mut	OK	2.11421	1.15046	3.26467	-0.877905	-1.98119	0.00085	0.0128191	yes
ENSDARG00000015563	LPIN3	6:1615500-1638559	wt	mut	OK	6.7493	4.8635	11.6128	-0.472743	-1.72701	0.0034	0.0365712	yes
ENSDARG00000039887	c1qbp	5:3590949-3604310	wt	mut	OK	123.381	88.8911	212.272	-0.473012	-2.19206	0.00025	0.0048518	yes
ENSDARG00000059925	usp24	20:7453148-7595747	wt	mut	OK	12.9421	9.32296	22.2651	-0.47321	-1.97397	0.00035	0.00635637	yes
ENSDARG00000076093	ftr76	15:41754330-41799111	wt	mut	OK	0.611619	1.43527	2.04689	1.23062	2.13451	0.00115	0.0161047	yes
ENSDARG00000076139	si:dkey-71p21.13	13:33188123-33191091	wt	mut	OK	0	1.81326	1.81326	inf	#NAME?	5e-05	0.0012271	yes
ENSDARG00000104944	si:ch73-36p18.2	25:34615322-34615733	wt	mut	OK	299.894	215.996	515.89	-0.473448	-2.06857	0.0004	0.00703486	yes
ENSDARG00000045989	arf4a	11:42203968-42212378	wt	mut	OK	20.6045	14.8398	35.4443	-0.473489	-2.08946	0.00025	0.0048518	yes
ENSDARG00000076255	znf1084	4:57135125-57353149	wt	mut	OK	1.27325	4.97795	6.2512	1.96704	2.66899	0.0002	0.00399838	yes
ENSDARG00000076362	tmem260	17:43995437-44078179	wt	mut	OK	1.08725	0.546948	1.6342	-0.991211	-2.06616	0.00065	0.0102791	yes
ENSDARG00000020841	rbm7	18:47287794-47347860	wt	mut	OK	18.6819	13.455	32.1369	-0.473501	-1.74736	0.0028	0.0315741	yes
ENSDARG00000076434	ARHGAP22 (1 of many)	12:2393437-2457737	wt	mut	OK	1.74439	0.77325	2.51764	-1.17372	-2.33174	0.0003	0.00565055	yes
ENSDARG00000015851	pnn	17:13089026-13099693	wt	mut	OK	12.9624	9.33008	22.2925	-0.474375	-1.88834	0.00085	0.0128191	yes
ENSDARG00000076484	stab1	22:10251737-10324699	wt	mut	OK	1.7441	2.8361	4.5802	0.701422	2.62536	5e-05	0.0012271	yes
ENSDARG00000076585	si:ch211-113e8.11	1:39389737-39397169	wt	mut	OK	3.67194	5.67215	9.34409	0.627354	2.24791	0.0001	0.00224065	yes
ENSDARG00000043154	ucp2	10:36706162-36738764	wt	mut	OK	92.6531	66.6532	159.306	-0.475164	-2.07684	0.0004	0.00703486	yes
ENSDARG00000076833	atp1b1b	1:10036182-10055110	wt	mut	OK	4.32082	2.58969	6.91051	-0.738527	-1.97669	0.00055	0.00903729	yes
ENSDARG00000058824	mrpl4	11:11319836-11347525	wt	mut	OK	52.843	37.9847	90.8277	-0.476292	-1.64105	0.00445	0.0445336	yes
ENSDARG00000076839	ftr86	15:545649-555950	wt	mut	OK	3.80716	5.71539	9.52255	0.586137	1.82627	0.00165	0.0211497	yes
ENSDARG00000060830	fam83hb	19:44016581-44043734	wt	mut	OK	6.85623	4.92598	11.7822	-0.477006	-1.82198	0.00125	0.0172117	yes
ENSDARG00000076950	kel	16:17352454-17392053	wt	mut	OK	0.474802	1.06154	1.53634	1.16076	2.12951	0.00095	0.0139255	yes
ENSDARG00000028327	gmfb	13:36459566-36486327	wt	mut	OK	178.464	128.049	306.513	-0.478938	-1.80129	0.00195	0.0241864	yes
ENSDARG00000076995	sharpin	2:341556-351972	wt	mut	OK	2.33492	4.12051	6.45543	0.819451	2.71179	5e-05	0.0012271	yes
ENSDARG00000019081	DHDH (1 of many)	18:1063228-1076354	wt	mut	OK	20.2961	14.5443	34.8404	-0.480747	-1.71831	0.00295	0.0327308	yes
ENSDARG00000089243	r3hcc1l	1:54270407-54280812	wt	mut	OK	14.3811	10.3035	24.6846	-0.481036	-1.76806	0.0017	0.0216618	yes
ENSDARG00000103027	clns1a	18:2941657-2954259	wt	mut	OK	34.3647	24.6188	58.9835	-0.48117	-1.96426	0.0006	0.00968363	yes
ENSDARG00000008637	mtp	1:11419100-11439741	wt	mut	OK	22.1112	15.8369	37.9481	-0.481486	-1.90161	0.0009	0.0133859	yes
ENSDARG00000077188	atrnl1a	13:19753684-20217313	wt	mut	OK	0.525198	1.70982	2.23502	1.70291	3.40484	5e-05	0.0012271	yes
ENSDARG00000077224	ypel2a	10:35257989-35293089	wt	mut	OK	1.22881	3.4153	4.64411	1.47475	2.10945	0.00175	0.0221517	yes
ENSDARG00000056008	atp5g1	3:23468741-23473848	wt	mut	OK	86.3355	61.8309	148.166	-0.481626	-2.08792	0.0002	0.00399838	yes
ENSDARG00000063895	mt-nd1	MT:3802-4777	wt	mut	OK	382.742	273.961	656.703	-0.482401	-2.33242	5e-05	0.0012271	yes
ENSDARG00000074471	vps39	17:49995400-50034417	wt	mut	OK	9.76976	6.99063	16.7604	-0.482901	-1.73112	0.0023	0.0272167	yes
ENSDARG00000077341	ppp1r14c	23:39914945-39956244	wt	mut	OK	0.930627	1.69104	2.62167	0.861637	2.38361	5e-05	0.0012271	yes
ENSDARG00000077396	tlcd2	15:25462861-25499820	wt	mut	OK	3.39545	5.07172	8.46717	0.57887	1.87285	0.00145	0.0191553	yes
ENSDARG00000006666	BUD13	21:22660453-22668742	wt	mut	OK	14.4276	10.3093	24.7369	-0.484889	-1.80887	0.00145	0.0191553	yes
ENSDARG00000074012	si:ch1073-159d7.7	7:6311481-6312858	wt	mut	OK	102.981	73.4778	176.459	-0.486998	-1.97896	0.0006	0.00968363	yes
ENSDARG00000075347	chfr	5:17276478-17309303	wt	mut	OK	24.1962	17.2631	41.4593	-0.487091	-2.12582	0.00025	0.0048518	yes
ENSDARG00000037488	canx	14:16127084-16171210	wt	mut	OK	89.6226	63.9318	153.554	-0.487329	-2.35624	5e-05	0.0012271	yes
ENSDARG00000043666	abt1	8:8445078-8451140	wt	mut	OK	45.1206	32.1708	77.2914	-0.488034	-2.01498	0.0002	0.00399838	yes
ENSDARG00000104068	gstp1	14:3400019-3406749	wt	mut	OK	69.0582	49.131	118.189	-0.491179	-2.07568	0.00065	0.0102791	yes
ENSDARG00000077546	zdhhc1	7:34919742-34941326	wt	mut	OK	4.6873	3.03092	7.71822	-0.628998	-2.17924	0.0002	0.00399838	yes
ENSDARG00000077590	ARSJ	7:57374729-57388691	wt	mut	OK	1.17437	1.8386	3.01297	0.646724	1.78695	0.0031	0.0340231	yes
ENSDARG00000077608	gpr137bb	11:44264949-44281050	wt	mut	OK	1.08693	0.356905	1.44383	-1.60665	-1.50225	0.001	0.0144983	yes
ENSDARG00000077641	thbs3a	16:42993823-43029574	wt	mut	OK	2.05696	3.46852	5.52548	0.753806	1.84182	0.0016	0.0207088	yes
ENSDARG00000077665	pimr140	2:19847113-19918491	wt	mut	OK	1.5249	0.157245	1.68215	-3.27763	-1.90681	0.00155	0.0201828	yes
ENSDARG00000038881	acaa2	8:2451081-2471335	wt	mut	OK	16.524	11.7506	28.2746	-0.491829	-1.90955	0.0012	0.0166562	yes
ENSDARG00000073801	si:dkeyp-104h9.5	8:47840368-47855464	wt	mut	OK	6.82652	4.85347	11.68	-0.492133	-1.69768	0.00405	0.0414933	yes
ENSDARG00000098021	si:dkey-111k8.2	3:61138845-61144539	wt	mut	OK	9.07361	6.44793	15.5215	-0.492841	-1.96184	0.00065	0.0102791	yes
ENSDARG00000077740	b3glctb	10:33682483-33766367	wt	mut	OK	1.24467	3.66571	4.91038	1.55833	2.30134	0.0005	0.00833478	yes
ENSDARG00000077753	SZT2	6:2334931-2491927	wt	mut	OK	2.87978	2.1549	5.03468	-0.418335	-1.65445	0.0043	0.0433594	yes
ENSDARG00000015790	atp1b3a	2:16879115-16897100	wt	mut	OK	40.2518	28.5964	68.8482	-0.493222	-2.0015	0.0003	0.00565055	yes
ENSDARG00000077839	DHX30	2:223146-245345	wt	mut	OK	2.09175	4.37247	6.46422	1.06374	3.63356	5e-05	0.0012271	yes
ENSDARG00000077855	znrf2a	19:1981132-1997548	wt	mut	OK	3.9959	2.0646	6.0605	-0.952655	-1.84962	0.00145	0.0191553	yes
ENSDARG00000077874	vwa10.1	1:39572980-39589733	wt	mut	OK	0.239612	0.813233	1.05285	1.76297	2.101	0.0032	0.0348326	yes
ENSDARG00000077988	abcc10	11:11927777-11978085	wt	mut	OK	2.05751	1.37022	3.42773	-0.586491	-1.71816	0.00365	0.0384219	yes
ENSDARG00000078058	dip2a	9:585107-695564	wt	mut	OK	2.8138	3.89042	6.70422	0.467406	1.67701	0.00385	0.0401354	yes
ENSDARG00000078114	CFP (1 of many)	8:23651014-23681186	wt	mut	OK	3.09924	5.29947	8.39871	0.773933	2.18505	0.00095	0.0139255	yes
ENSDARG00000040401	slc25a20	22:132316-136657	wt	mut	OK	26.0883	18.5303	44.6186	-0.493513	-1.9603	0.00065	0.0102791	yes
ENSDARG00000024026	sdf2	21:25984800-25991510	wt	mut	OK	24.4368	17.3438	41.7806	-0.49463	-2.10885	0.00035	0.00635637	yes
ENSDARG00000042791	git2b	10:40362816-40396293	wt	mut	OK	7.14391	5.07004	12.214	-0.494717	-2.02546	0.00045	0.00770223	yes
ENSDARG00000078245	gal3st1b	10:1694378-1706191	wt	mut	OK	1.00929	0.134328	1.14362	-2.9095	-2.36159	0.00105	0.0150587	yes
ENSDARG00000078272	CABP7 (1 of many)	5:11002276-11009863	wt	mut	OK	0.838612	4.84557	5.68418	2.53059	2.77014	0.00055	0.00903729	yes
ENSDARG00000078301	zgc:162255	22:686915-695616	wt	mut	OK	4.03954	2.43278	6.47232	-0.731585	-2.0604	0.0004	0.00703486	yes
ENSDARG00000004211	ccdc106a	16:17734794-17752003	wt	mut	OK	22.9063	16.2562	39.1625	-0.49476	-2.03244	0.0005	0.00833478	yes
ENSDARG00000078363	mcoln3a	2:1615797-1643967	wt	mut	OK	2.80732	4.81405	7.62137	0.778055	2.51998	0.0001	0.00224065	yes
ENSDARG00000100083	sgut1	1:27283616-27325511	wt	mut	OK	14.8408	10.528	25.3688	-0.495329	-1.71099	0.00305	0.0336026	yes
ENSDARG00000078585	mon1a	11:34909422-34923074	wt	mut	OK	1.89848	3.47023	5.36871	0.870185	2.83701	5e-05	0.0012271	yes
ENSDARG00000078643	vtcn1	9:20708999-20713490	wt	mut	OK	2.10902	5.60263	7.71165	1.40953	2.92659	5e-05	0.0012271	yes
ENSDARG00000090785	diaph3	11:31417516-31802038	wt	mut	OK	18.3101	12.9676	31.2777	-0.497728	-1.70607	0.0024	0.0281108	yes
ENSDARG00000078694	phlpp1	2:256913-270509	wt	mut	OK	2.31902	3.70288	6.0219	0.675135	2.44336	5e-05	0.0012271	yes
ENSDARG00000078745	pnpla8	4:13627042-13644767	wt	mut	OK	3.38261	1.74708	5.12969	-0.953192	-1.72523	0.00185	0.0231458	yes
ENSDARG00000078749	b4galnt3a	4:26401652-26424193	wt	mut	OK	1.36574	0.110006	1.47575	-3.63403	-4.242	0.00025	0.0048518	yes
ENSDARG00000078832	si:dkey-73p2.3	3:4493689-4515952	wt	mut	OK	0.227549	1.16653	1.39408	2.35798	2.67514	5e-05	0.0012271	yes
ENSDARG00000103770	ARMC6	2:56907371-56933095	wt	mut	OK	9.6562	6.83646	16.4927	-0.498206	-1.62386	0.0042	0.042525	yes
ENSDARG00000057151	prep	20:48607290-48657296	wt	mut	OK	32.048	22.6713	54.7193	-0.49937	-2.21095	0.0001	0.00224065	yes
ENSDARG00000007693	nfkbiab	17:12788567-12792670	wt	mut	OK	42.6928	30.1977	72.8905	-0.499556	-2.11021	0.0003	0.00565055	yes
ENSDARG00000078904	brd4	3:52861508-52969617	wt	mut	OK	5.39049	3.81294	9.20343	-0.499514	-1.98591	0.00045	0.00770223	yes
ENSDARG00000058461	ice1	16:9509758-9529456	wt	mut	OK	8.60505	6.08171	14.6868	-0.500708	-2.07366	0.0002	0.00399838	yes
ENSDARG00000088999	METTL4	7:71335009-71343798	wt	mut	OK	7.98889	5.64618	13.6351	-0.50072	-1.88643	0.0011	0.0155943	yes
ENSDARG00000056627	cxcl14	14:24103553-24113428	wt	mut	OK	98.0814	69.298	167.379	-0.501165	-2.3397	5e-05	0.0012271	yes
ENSDARG00000079034	si:dkey-19b23.11	7:20325725-20330953	wt	mut	OK	3.23347	1.78417	5.01764	-0.857825	-1.71053	0.00095	0.0139255	yes
ENSDARG00000079064	PDE2A	15:47446045-47504873	wt	mut	OK	0.909935	0.428815	1.33875	-1.08541	-1.81879	0.00335	0.036214	yes
ENSDARG00000089705	CABZ01084566.2	2:1348349-1355921	wt	mut	OK	29.2469	20.6499	49.8968	-0.502148	-1.76063	0.0024	0.0281108	yes
ENSDARG00000079188	nxph2b	11:33583637-33595109	wt	mut	OK	1.99546	0.58485	2.58031	-1.77058	-2.05636	0.0002	0.00399838	yes
ENSDARG00000079199	megf6a	23:21193040-21288969	wt	mut	OK	1.83069	3.17291	5.0036	0.793421	2.57675	5e-05	0.0012271	yes
ENSDARG00000056394	TOM1L2	3:61860596-61889069	wt	mut	OK	12.3235	8.70103	21.0245	-0.502155	-1.78321	0.00275	0.031112	yes
ENSDARG00000079245	si:dkey-73p2.2	3:4384645-4395927	wt	mut	OK	0.133941	1.83043	1.96437	3.77251	2.23447	5e-05	0.0012271	yes
ENSDARG00000101289	slc29a1a	13:46542392-46592299	wt	mut	OK	64.5292	45.546	110.075	-0.502627	-2.42874	5e-05	0.0012271	yes
ENSDARG00000044241	dram2b	22:818829-849298	wt	mut	OK	10.8934	7.68106	18.5745	-0.504076	-1.77049	0.002	0.0245944	yes
ENSDARG00000030153	gnptab	4:17682637-17716132	wt	mut	OK	7.74061	5.45643	13.197	-0.504488	-1.68798	0.0012	0.0166562	yes
ENSDARG00000079305	hbae3	3:54891984-54893256	wt	mut	OK	0.863665	5.72262	6.58629	2.72813	2.75156	0.0002	0.00399838	yes
ENSDARG00000088590	pxna	5:6110302-6155553	wt	mut	OK	7.63797	5.3814	13.0194	-0.505209	-1.6127	0.00415	0.0422918	yes
ENSDARG00000073978	crabp2a	16:14493358-14506883	wt	mut	OK	36.2778	25.552	61.8298	-0.505652	-2.18954	0.00015	0.00315604	yes
ENSDARG00000079399	F2RL3	14:36528958-36538674	wt	mut	OK	2.22499	4.67281	6.8978	1.07049	3.64915	5e-05	0.0012271	yes
ENSDARG00000079403	si:dkey-204l11.1	5:34923255-34940827	wt	mut	OK	1.15199	2.10714	3.25913	0.871164	2.16048	5e-05	0.0012271	yes
ENSDARG00000079455	nlgn4a	1:31789010-31960787	wt	mut	OK	1.09383	1.98087	3.0747	0.856737	2.09021	0.00055	0.00903729	yes
ENSDARG00000079456	si:ch211-149a19.3	19:1928644-1979455	wt	mut	OK	3.53099	0.896896	4.42789	-1.97706	-5.03275	5e-05	0.0012271	yes
ENSDARG00000079537	ftr13	2:43276699-43281581	wt	mut	OK	1.82741	0.734927	2.56234	-1.31413	-2.27961	0.00015	0.00315604	yes
ENSDARG00000079564	vmhc	2:24600868-24614260	wt	mut	OK	1.97909	5.1438	7.12289	1.378	4.69746	5e-05	0.0012271	yes
ENSDARG00000079591	SSH3	14:35124679-35156224	wt	mut	OK	3.65845	2.38088	6.03933	-0.619738	-2.26485	0.0001	0.00224065	yes
ENSDARG00000046141	zgc:162025	8:39768731-39789143	wt	mut	OK	21.0912	14.8402	35.9314	-0.507132	-1.72909	0.0025	0.0290455	yes
ENSDARG00000054096	rbm41	21:37965370-37983432	wt	mut	OK	7.28958	5.11965	12.4092	-0.50979	-1.71462	0.00395	0.0408569	yes
ENSDARG00000079657	si:dkey-53k12.18	2:48798508-48813485	wt	mut	OK	2.1919	0	2.1919	#NAME?	#NAME?	5e-05	0.0012271	yes
ENSDARG00000014680	znf710a	18:26061595-26110160	wt	mut	OK	21.1634	14.86	36.0234	-0.510138	-2.15759	0.0001	0.00224065	yes
ENSDARG00000068894	nrip1b	10:38312797-38372376	wt	mut	OK	10.5424	7.39758	17.94	-0.511079	-1.926	0.00065	0.0102791	yes
ENSDARG00000079766	tap1	16:48736636-48763813	wt	mut	OK	0.652683	1.47586	2.12854	1.1771	2.34822	0.00035	0.00635637	yes
ENSDARG00000079782	vmhcl	2:24618672-24633992	wt	mut	OK	0.241889	1.30109	1.54298	2.4273	1.0394	0.0006	0.00968363	yes
ENSDARG00000079850	dchs1b	10:26307358-26468302	wt	mut	OK	2.43975	3.3507	5.79045	0.457731	1.8745	0.00085	0.0128191	yes
ENSDARG00000015662	pla2g12b	13:4543111-4555009	wt	mut	OK	43.6151	30.6033	74.2184	-0.511143	-2.09834	0.00015	0.00315604	yes
ENSDARG00000079892	si:dkey-183c2.4	4:14645320-14650403	wt	mut	OK	1.27065	0.535255	1.80591	-1.24727	-2.24244	0.0006	0.00968363	yes
ENSDARG00000026839	med21	4:1908148-1910242	wt	mut	OK	34.7681	24.3909	59.159	-0.51142	-1.86933	0.00125	0.0172117	yes
ENSDARG00000079947	gfi1b	21:17243515-17259903	wt	mut	OK	1.49075	0.343487	1.83424	-2.11772	-1.54213	0.00205	0.0250132	yes
ENSDARG00000042894	tyms	7:71293903-71300188	wt	mut	OK	45.5933	31.9414	77.5347	-0.513396	-2.16941	0.00025	0.0048518	yes
ENSDARG00000079985	nrip2	4:17583518-17640468	wt	mut	OK	1.45469	0.432127	1.88682	-1.75118	-3.53673	5e-05	0.0012271	yes
ENSDARG00000078959	gb:eh507706	11:30400351-30414570	wt	mut	OK	5.95183	4.1667	10.1185	-0.514428	-1.69198	0.0034	0.0365712	yes
ENSDARG00000059227	fabp1b.1	8:933677-940431	wt	mut	OK	228.738	160.108	388.846	-0.514655	-2.1335	0.00035	0.00635637	yes
ENSDARG00000099760	CT573263.1	4:64866059-64872970	wt	mut	OK	8.3457	5.83913	14.1848	-0.515279	-1.79451	0.00165	0.0211497	yes
ENSDARG00000097020	si:dkey-261m9.8	25:34629434-34629845	wt	mut	OK	516.56	360.671	877.231	-0.518252	-2.37519	0.0001	0.00224065	yes
ENSDARG00000086041	zgc:174650	4:40337623-40406453	wt	mut	OK	1.79576	0.652656	2.44842	-1.4602	-2.36765	5e-05	0.0012271	yes
ENSDARG00000099366	supt4h1	5:2790581-2797865	wt	mut	OK	208.943	145.884	354.827	-0.518283	-2.23357	0.0001	0.00224065	yes
ENSDARG00000086182	znf985	4:33923327-33940563	wt	mut	OK	2.2593	0.934873	3.19417	-1.27304	-2.48102	0.0002	0.00399838	yes
ENSDARG00000086216	prr13	11:13169-18449	wt	mut	OK	0.954558	2.33153	3.28609	1.28837	1.74299	0.00305	0.0336026	yes
ENSDARG00000086296	si:ch211-209p16.1	4:44084821-44105274	wt	mut	OK	1.63191	2.7577	4.38961	0.756909	1.79834	0.00255	0.0294479	yes
ENSDARG00000086310	zgc:194508	12:8040359-8070520	wt	mut	OK	1.85323	3.46829	5.32152	0.904188	1.7457	0.00355	0.0377376	yes
ENSDARG00000020956	pck2	24:12775599-12794503	wt	mut	OK	23.8301	16.6304	40.4605	-0.518964	-2.19397	5e-05	0.0012271	yes
ENSDARG00000009494	xrcc1	16:54351048-54387738	wt	mut	OK	41.5903	28.9959	70.5862	-0.520397	-2.4153	5e-05	0.0012271	yes
ENSDARG00000086459	si:ch211-165g14.1	3:58417523-58433067	wt	mut	OK	2.86388	3.95117	6.81505	0.464311	1.68353	0.00365	0.0384219	yes
ENSDARG00000086518	si:ch211-155o21.3	20:11732864-11737165	wt	mut	OK	0.183932	0.961137	1.14507	2.38557	2.17522	0.0006	0.00968363	yes
ENSDARG00000086576	si:cabz01069012.2	4:72399862-72444337	wt	mut	OK	0.83419	0.48696	1.32115	-0.776573	-2.11807	0.00015	0.00315604	yes
ENSDARG00000016548	eif5b	1:45233553-45264031	wt	mut	OK	15.9026	11.0827	26.9853	-0.52096	-2.27672	5e-05	0.0012271	yes
ENSDARG00000086668	si:dkey-7j22.4	4:43898251-44033714	wt	mut	OK	1.54287	4.67295	6.21582	1.59872	2.39314	0.0001	0.00224065	yes
ENSDARG00000039757	mcfd2	13:8351614-8360837	wt	mut	OK	14.4194	10.0479	24.4673	-0.521113	-2.09535	0.0003	0.00565055	yes
ENSDARG00000086998	NNMT	11:11991086-11996233	wt	mut	OK	2.17458	1.11357	3.28815	-0.965546	-2.25395	0.00025	0.0048518	yes
ENSDARG00000053973	fetub	22:37934446-37944777	wt	mut	OK	50.351	35.031	85.382	-0.52339	-2.22232	5e-05	0.0012271	yes
ENSDARG00000016360	kpna1	24:20796940-20812362	wt	mut	OK	23.2952	16.1995	39.4947	-0.524084	-2.33797	0.0001	0.00224065	yes
ENSDARG00000086709	zgc:173552	7:73622161-73622572	wt	mut	OK	509.579	354.299	863.878	-0.524337	-2.41564	5e-05	0.0012271	yes
ENSDARG00000087131	ifnlr1	16:52459098-52487623	wt	mut	OK	1.40975	0.789957	2.19971	-0.835595	-2.01035	0.001	0.0144983	yes
ENSDARG00000087188	nfil3-6	3:13949849-13953705	wt	mut	OK	0.700933	1.33853	2.03946	0.933302	1.85485	0.00235	0.0276566	yes
ENSDARG00000054906	ier5l	5:32191091-32193328	wt	mut	OK	26.3818	18.3374	44.7192	-0.524754	-2.26166	0.00025	0.0048518	yes
ENSDARG00000087247	kcnab2a	11:40864060-41087770	wt	mut	OK	2.44371	5.22037	7.66408	1.09508	2.81974	5e-05	0.0012271	yes
ENSDARG00000087262	zgc:63568	14:35552487-35571668	wt	mut	OK	0.95656	2.73631	3.69287	1.51631	2.99445	5e-05	0.0012271	yes
ENSDARG00000087377	lbh	13:51610359-51617488	wt	mut	OK	1.5809	4.01541	5.59631	1.3448	2.34215	0.0005	0.00833478	yes
ENSDARG00000104374	smchd1	7:71345103-71469295	wt	mut	OK	9.53169	6.61186	16.1435	-0.527676	-2.30575	0.00015	0.00315604	yes
ENSDARG00000087417	zdhhc5b	14:50019743-50044225	wt	mut	OK	2.6266	4.69592	7.32252	0.838214	3.06669	5e-05	0.0012271	yes
ENSDARG00000053405	sord	7:30652132-30654880	wt	mut	OK	11.009	7.6234	18.6324	-0.530172	-1.69115	0.00365	0.0384219	yes
ENSDARG00000069432	plscr3b	7:26310450-26332550	wt	mut	OK	54.114	37.4312	91.5452	-0.53176	-2.48333	5e-05	0.0012271	yes
ENSDARG00000087645	znf1064	4:47114890-47141723	wt	mut	OK	2.09905	4.47205	6.5711	1.0912	2.42675	5e-05	0.0012271	yes
ENSDARG00000087657	fasn	12:33294764-33349529	wt	mut	OK	2.96026	4.34514	7.3054	0.553679	1.46256	0.0033	0.0357631	yes
ENSDARG00000087666	fibpb	21:25568762-25576644	wt	mut	OK	1.40648	0.644271	2.05075	-1.12635	-1.7388	0.003	0.0332214	yes
ENSDARG00000087714	si:ch211-226o13.1	4:43172803-43197659	wt	mut	OK	3.67907	1.48957	5.16864	-1.30444	-3.81563	5e-05	0.0012271	yes
ENSDARG00000094518	si:ch211-125e6.8	9:33305331-33310841	wt	mut	OK	13.8576	9.58416	23.4418	-0.531948	-1.61982	0.0045	0.0448001	yes
ENSDARG00000087788	si:ch211-22k7.9	4:38700529-38724938	wt	mut	OK	0.253022	0.779544	1.03257	1.62337	1.28797	0.00505	0.0486475	yes
ENSDARG00000088178	tp53inp2	11:25013878-25028619	wt	mut	OK	29.4811	20.3889	49.87	-0.532006	-1.90045	0.00095	0.0139255	yes
ENSDARG00000071005	ppp1r3ca	17:23291352-23294154	wt	mut	OK	12.1828	8.42151	20.6043	-0.532699	-1.99849	0.0005	0.00833478	yes
ENSDARG00000087839	si:dkey-33c14.6	2:353561-356792	wt	mut	OK	1.57557	0.750446	2.32602	-1.07005	-2.07992	0.0014	0.0186807	yes
ENSDARG00000042232	specc1lb	21:13136388-13187672	wt	mut	OK	6.43391	4.44447	10.8784	-0.533687	-1.53111	0.00265	0.0302985	yes
ENSDARG00000021374	cab39l1	14:31136658-31167430	wt	mut	OK	23.1136	15.9595	39.0731	-0.534328	-1.91111	0.001	0.0144983	yes
ENSDARG00000030573	nudt1	3:41979307-41983797	wt	mut	OK	15.5405	10.7288	26.2693	-0.534543	-1.80532	0.00155	0.0201828	yes
ENSDARG00000100833	si:dkey-269i1.4	20:12559245-12563583	wt	mut	OK	1025.67	706.895	1732.57	-0.537006	-2.48706	5e-05	0.0012271	yes
ENSDARG00000087985	znf365	17:43633059-43648155	wt	mut	OK	2.17963	0.869854	3.04948	-1.32524	-2.56454	0.00015	0.00315604	yes
ENSDARG00000087999	si:dkey-286j17.3	22:9753271-9761685	wt	mut	OK	3.5069	0	3.5069	#NAME?	#NAME?	5e-05	0.0012271	yes
ENSDARG00000088000	znf1057	4:47771777-47905558	wt	mut	OK	1.8262	3.28432	5.11052	0.846752	1.76974	0.0019	0.0236342	yes
ENSDARG00000088051	znf1004	3:10762426-10813234	wt	mut	OK	1.60557	0.268449	1.87402	-2.58036	-2.13751	0.0002	0.00399838	yes
ENSDARG00000077405	si:ch211-116m6.3	23:45487011-45605143	wt	mut	OK	8.38296	5.77057	14.1535	-0.538745	-1.90092	0.0006	0.00968363	yes
ENSDARG00000088142	si:dkey-159n16.2	4:47738339-47766702	wt	mut	OK	0.234711	0.801738	1.03645	1.77224	2.17491	0.0004	0.00703486	yes
ENSDARG00000038243	e4f1	3:18564402-18587386	wt	mut	OK	18.4869	12.7218	31.2087	-0.539196	-2.2259	0.0002	0.00399838	yes
ENSDARG00000073753	tacc1	10:20500097-20520055	wt	mut	OK	8.04193	5.53328	13.5752	-0.539407	-2.2245	0.0001	0.00224065	yes
ENSDARG00000088337	wu:fc34e06	1:39965480-39986482	wt	mut	OK	1.27798	0.706609	1.98459	-0.854884	-2.33187	5e-05	0.0012271	yes
ENSDARG00000088342	tmem145	16:26153568-26201087	wt	mut	OK	0.286733	2.38212	2.66885	3.05446	2.68838	5e-05	0.0012271	yes
ENSDARG00000070560	nap1l4a	25:23458070-23485569	wt	mut	OK	28.8316	19.817	48.6486	-0.540915	-2.32502	5e-05	0.0012271	yes
ENSDARG00000088452	si:dkey-24i24.3	16:28775944-28819448	wt	mut	OK	0.277411	2.0668	2.34421	2.8973	2.26469	0.00175	0.0221517	yes
ENSDARG00000016350	cap1	19:44120313-44141474	wt	mut	OK	11.3921	7.81501	19.2071	-0.543709	-1.79486	0.0012	0.0166562	yes
ENSDARG00000088672	CABZ01054962.1	9:53471603-53522472	wt	mut	OK	1.93373	3.25529	5.18902	0.751399	1.89387	0.0016	0.0207088	yes
ENSDARG00000038505	polr2h	22:36554982-36561348	wt	mut	OK	79.1617	54.262	133.424	-0.54486	-2.46003	5e-05	0.0012271	yes
ENSDARG00000071468	mrpl54	22:15693076-15694077	wt	mut	OK	52.2521	35.8056	88.0577	-0.545305	-2.06977	0.00045	0.00770223	yes
ENSDARG00000088743	zgc:174193	10:34262755-34276381	wt	mut	OK	0.448433	1.49408	1.94251	1.73629	1.89977	0.00145	0.0191553	yes
ENSDARG00000088847	znf1089	4:62438188-62450854	wt	mut	OK	6.72929	1.49161	8.2209	-2.17358	-4.30977	5e-05	0.0012271	yes
ENSDARG00000088900	si:dkey-21o19.2	23:24195021-24205411	wt	mut	OK	3.20342	6.57235	9.77577	1.0368	2.30371	0.0002	0.00399838	yes
ENSDARG00000088908	si:ch73-281f12.3p	3:58643012-58651448	wt	mut	OK	1.6082	0.265668	1.87387	-2.59775	-4.40556	5e-05	0.0012271	yes
ENSDARG00000028201	commd8	13:12245598-12257273	wt	mut	OK	26.3686	18.0651	44.4337	-0.545618	-2.0234	0.00075	0.0116365	yes
ENSDARG00000089009	frmpd1b	14:4084156-4166417	wt	mut	OK	3.07784	4.789	7.86684	0.637808	1.92917	0.0005	0.00833478	yes
ENSDARG00000062054	cpt1ab	25:23494441-23546729	wt	mut	OK	10.3102	7.06098	17.3712	-0.546128	-2.18991	0.00025	0.0048518	yes
ENSDARG00000100555	aqp11	18:2928261-2936575	wt	mut	OK	6.27128	4.29182	10.5631	-0.547173	-1.91474	0.00085	0.0128191	yes
ENSDARG00000089139	im:7145024	25:8933356-8963844	wt	mut	OK	1.40184	3.03997	4.44181	1.11673	1.73962	0.0022	0.0263588	yes
ENSDARG00000089158	si:dkeyp-104f11.6	20:47240178-47248145	wt	mut	OK	2.28983	4.55593	6.84576	0.992504	2.52745	0.0001	0.00224065	yes
ENSDARG00000089190	TANC1 (1 of many)	9:52471707-52751628	wt	mut	OK	2.78997	4.13035	6.92032	0.566014	2.04618	0.00045	0.00770223	yes
ENSDARG00000000394	matr3l1.1	14:24782536-24802743	wt	mut	OK	102.099	69.7789	171.878	-0.549112	-2.27551	5e-05	0.0012271	yes
ENSDARG00000089331	CABZ01117575.1	25:36617654-36621675	wt	mut	OK	2.78654	6.22367	9.01021	1.15929	2.71211	5e-05	0.0012271	yes
ENSDARG00000011597	atxn2l	3:15244627-15275891	wt	mut	OK	6.75148	4.61287	11.3643	-0.549541	-2.04829	0.00055	0.00903729	yes
ENSDARG00000016154	zfp36l1a	17:37845031-37848280	wt	mut	OK	31.4392	21.4681	52.9073	-0.550369	-2.36765	5e-05	0.0012271	yes
ENSDARG00000089399	tmem176l.2	16:46673055-46678680	wt	mut	OK	0	1.18776	1.18776	inf	#NAME?	5e-05	0.0012271	yes
ENSDARG00000040321	rx2	2:55709126-55737506	wt	mut	OK	20.7108	14.1338	34.8446	-0.551234	-2.12721	0.00045	0.00770223	yes
ENSDARG00000061124	srpr	18:44832718-44854401	wt	mut	OK	16.959	11.5694	28.5284	-0.551739	-2.34502	5e-05	0.0012271	yes
ENSDARG00000002872	zgc:113210	3:52392480-52406579	wt	mut	OK	8.05409	5.49446	13.5486	-0.551742	-1.9459	0.00075	0.0116365	yes
ENSDARG00000001162	matr3l1.1	14:24766072-24781335	wt	mut	OK	24.0259	16.3871	40.413	-0.552024	-2.4178	5e-05	0.0012271	yes
ENSDARG00000103846	hspa5	5:2440675-2448586	wt	mut	OK	53.7167	36.5903	90.307	-0.553911	-2.57675	5e-05	0.0012271	yes
ENSDARG00000105350	si:ch1073-153i20.4	7:6296314-6297037	wt	mut	OK	131.121	89.2529	220.374	-0.554929	-2.45273	5e-05	0.0012271	yes
ENSDARG00000042630	hebp2	20:30991213-30998155	wt	mut	OK	13.3485	9.08366	22.4322	-0.555329	-1.93229	0.00055	0.00903729	yes
ENSDARG00000087937	cdk4	11:170967-197220	wt	mut	OK	11.3336	7.70347	19.0371	-0.557024	-1.71154	0.00285	0.03195	yes
ENSDARG00000089901	si:ch211-261n11.8	8:22468829-22475063	wt	mut	OK	2.69693	0	2.69693	#NAME?	#NAME?	5e-05	0.0012271	yes
ENSDARG00000089913	cacna1g	12:27612654-27975985	wt	mut	OK	0.467653	1.15747	1.62512	1.30747	3.0043	5e-05	0.0012271	yes
ENSDARG00000089919	si:ch211-161h7.8	24:20815796-20819960	wt	mut	OK	0.477833	2.41023	2.88806	2.33459	2.99079	0.00015	0.00315604	yes
ENSDARG00000006196	sav1	13:36661244-36672372	wt	mut	OK	8.33319	5.66402	13.9972	-0.557043	-1.93349	0.0006	0.00968363	yes
ENSDARG00000089940	znf1008	2:289030-293894	wt	mut	OK	1.60255	2.82421	4.42676	0.817478	2.13295	0.00025	0.0048518	yes
ENSDARG00000060101	trappc12	17:51142174-51173376	wt	mut	OK	7.31042	4.96778	12.2782	-0.557352	-1.8006	0.0014	0.0186807	yes
ENSDARG00000089961	si:cabz01007807.1	7:2309457-2335183	wt	mut	OK	1.14676	0.490214	1.63697	-1.22608	-1.90375	0.0027	0.0307074	yes
ENSDARG00000038228	sepw2a	3:19958478-19968602	wt	mut	OK	116.849	79.2988	196.148	-0.559272	-2.70339	5e-05	0.0012271	yes
ENSDARG00000090035	rtn4r	5:10266179-10445867	wt	mut	OK	3.01133	0.488182	3.49951	-2.62491	-2.82742	5e-05	0.0012271	yes
ENSDARG00000090097	si:ch211-255i3.5	16:34603641-34611458	wt	mut	OK	0.264166	0.998593	1.26276	1.91845	2.0236	0.0004	0.00703486	yes
ENSDARG00000051874	stra6	25:22474140-22541638	wt	mut	OK	20.479	13.893	34.372	-0.559787	-1.99319	0.00015	0.00315604	yes
ENSDARG00000063191	extl2	2:7251630-7260085	wt	mut	OK	11.7564	7.97397	19.7304	-0.560081	-1.87014	0.0012	0.0166562	yes
ENSDARG00000099336	mvda	18:31078888-31090529	wt	mut	OK	12.0786	8.19189	20.2705	-0.560184	-1.73565	0.00275	0.031112	yes
ENSDARG00000090400	CR388363.1	4:58803633-58827891	wt	mut	OK	0.974665	2.77732	3.75198	1.51071	3.38521	5e-05	0.0012271	yes
ENSDARG00000017910	pdss1	24:5985969-5995137	wt	mut	OK	27.5296	18.6589	46.1885	-0.561119	-2.3042	0.0001	0.00224065	yes
ENSDARG00000089986	TP53INP2	23:2597814-2610837	wt	mut	OK	8.42297	5.70843	14.1314	-0.561236	-2.11868	0.0001	0.00224065	yes
ENSDARG00000090532	znf974	4:47771777-47905558	wt	mut	OK	0.341214	6.13758	6.47879	4.16892	3.31062	0.00105	0.0150587	yes
ENSDARG00000090575	CABZ01058333.1	3:8880714-8887021	wt	mut	OK	0.87387	0.221899	1.09577	-1.97751	-2.23025	0.0035	0.0373442	yes
ENSDARG00000090637	myh6	20:53772084-53778019	wt	mut	OK	0.225592	0.827617	1.05321	1.87525	3.69999	5e-05	0.0012271	yes
ENSDARG00000041428	yrdc	16:4353569-4361437	wt	mut	OK	9.89786	6.70398	16.6018	-0.562098	-1.87715	0.0015	0.0196952	yes
ENSDARG00000077694	dtnba	20:47412303-47470456	wt	mut	OK	18.7929	12.7222	31.5151	-0.562846	-1.59555	0.0052	0.0497039	yes
ENSDARG00000090840	znf980	4:44111089-44127717	wt	mut	OK	1.49899	2.73219	4.23118	0.86607	2.08034	0.00135	0.0182536	yes
ENSDARG00000090869	FO904898.4	22:6852415-6860493	wt	mut	OK	2.12243	6.79788	8.92031	1.67936	3.38189	5e-05	0.0012271	yes
ENSDARG00000007347	degs1	13:371938-384552	wt	mut	OK	10.4086	7.04283	17.4514	-0.563546	-1.80054	0.00155	0.0201828	yes
ENSDARG00000090957	si:dkey-234l24.10p	4:14117516-14125134	wt	mut	OK	1.11469	0.395864	1.51055	-1.49356	-2.0195	0.004	0.0411766	yes
ENSDARG00000090976	NABP2	11:2437222-2446570	wt	mut	OK	4.11457	5.61175	9.72632	0.447709	1.64323	0.0048	0.0469203	yes
ENSDARG00000051735	si:ch211-113a14.18	25:35790147-35790797	wt	mut	OK	138.684	93.4732	232.157	-0.569174	-2.48953	5e-05	0.0012271	yes
ENSDARG00000091243	znf975	20:47292784-47300242	wt	mut	OK	1.70575	4.22409	5.92984	1.30824	2.49664	0.00015	0.00315604	yes
ENSDARG00000091320	zgc:136791	1:54089291-54107532	wt	mut	OK	4.59328	3.29019	7.88347	-0.481354	-1.65205	0.0042	0.042525	yes
ENSDARG00000043180	gpd1b	22:6966199-6977128	wt	mut	OK	17.7843	11.9839	29.7682	-0.569504	-2.05755	0.0002	0.00399838	yes
ENSDARG00000091624	ugt2a7	5:8872335-8933732	wt	mut	OK	0.328803	1.61452	1.94332	2.29581	2.69679	5e-05	0.0012271	yes
ENSDARG00000104938	ftsj3	22:3167287-3194717	wt	mut	OK	15.0684	10.1525	25.2209	-0.569686	-2.31539	5e-05	0.0012271	yes
ENSDARG00000029133	tubgcp3	1:45714061-45759038	wt	mut	OK	6.32788	4.2633	10.5912	-0.569749	-2.13286	0.00015	0.00315604	yes
ENSDARG00000000442	slc39a13	7:32422739-32444869	wt	mut	OK	13.4219	9.0399	22.4618	-0.570212	-2.33204	0.0001	0.00224065	yes
ENSDARG00000091834	si:ch211-198m17.1	3:38563566-38603740	wt	mut	OK	0.95023	2.64903	3.59926	1.47912	4.07024	5e-05	0.0012271	yes
ENSDARG00000095432	si:rp71-26b20.1	24:1374582-1402807	wt	mut	OK	7.96411	5.36395	13.3281	-0.570218	-1.70785	0.0041	0.0418812	yes
ENSDARG00000091930	si:ch211-12e13.1	5:8713679-8716786	wt	mut	OK	2.69124	5.52374	8.21498	1.03738	2.14398	0.00105	0.0150587	yes
ENSDARG00000091947	znf106b	20:26037279-26102200	wt	mut	OK	4.70637	3.47944	8.18581	-0.435761	-1.72645	0.003	0.0332214	yes
ENSDARG00000091994	znf1046	4:44360250-44369333	wt	mut	OK	0.686156	1.7783	2.46446	1.37389	2.59545	0.0001	0.00224065	yes
ENSDARG00000092000	znf1020	4:46954148-46970174	wt	mut	OK	2.01165	3.97926	5.99091	0.984123	2.6891	5e-05	0.0012271	yes
ENSDARG00000079639	PRRC2B	5:71232140-71274138	wt	mut	OK	7.32204	4.92429	12.2463	-0.572329	-2.4237	5e-05	0.0012271	yes
ENSDARG00000076144	si:ch211-74m13.3	3:54489466-54519018	wt	mut	OK	9.4493	6.33849	15.7878	-0.576067	-1.82923	0.0024	0.0281108	yes
ENSDARG00000092131	si:ch211-219f7.3	5:39957078-40114449	wt	mut	OK	1.70065	5.18494	6.88559	1.60824	2.84067	5e-05	0.0012271	yes
ENSDARG00000025420	fzd5	9:28421775-28423698	wt	mut	OK	9.56635	6.41372	15.9801	-0.576807	-1.96767	0.0006	0.00968363	yes
ENSDARG00000092272	si:dkey-248g17.3	16:33612966-33638305	wt	mut	OK	3.7301	1.23821	4.96831	-1.59096	-2.47748	0.00015	0.00315604	yes
ENSDARG00000092277	si:dkey-148n20.1	14:39740639-39745317	wt	mut	OK	1.19694	0.242947	1.43989	-2.30063	-1.3939	0.00035	0.00635637	yes
ENSDARG00000092310	si:ch211-199g17.2	19:43984188-44008335	wt	mut	OK	2.67283	6.8661	9.53893	1.36112	2.33679	0.0001	0.00224065	yes
ENSDARG00000092315	si:dkeyp-15f12.4	5:31529328-31532046	wt	mut	OK	1.6313	3.29505	4.92635	1.01427	1.64168	0.0048	0.0469203	yes
ENSDARG00000092327	si:dkeyp-2e4.3	13:44698869-44699823	wt	mut	OK	1.92083	3.67821	5.59904	0.937273	1.80471	0.00325	0.0352878	yes
ENSDARG00000074756	tfb2m	17:11904442-11919289	wt	mut	OK	13.5647	9.08636	22.6511	-0.578085	-2.14965	0.0002	0.00399838	yes
ENSDARG00000055100	cxcl12b	22:27067101-27083041	wt	mut	OK	23.083	15.4495	38.5325	-0.579272	-2.50878	5e-05	0.0012271	yes
ENSDARG00000024967	fancg	5:40896336-40909186	wt	mut	OK	12.1166	8.09741	20.214	-0.581451	-1.98335	0.0009	0.0133859	yes
ENSDARG00000041394	dnajb1b	1:55052553-55072557	wt	mut	OK	30.389	20.2989	50.6879	-0.582149	-2.24078	0.0002	0.00399838	yes
ENSDARG00000092578	si:ch211-222e20.4	10:28541596-28545184	wt	mut	OK	3.30251	0	3.30251	#NAME?	#NAME?	5e-05	0.0012271	yes
ENSDARG00000054054	zgc:153219	7:32859488-32871859	wt	mut	OK	6.82556	4.55753	11.3831	-0.582696	-1.78526	0.00205	0.0250132	yes
ENSDARG00000043663	faub	10:27028381-27035631	wt	mut	OK	27.5041	18.3537	45.8578	-0.583576	-1.9129	0.001	0.0144983	yes
ENSDARG00000092889	SYCE3	14:34170385-34172789	wt	mut	OK	7.34335	1.81117	9.15452	-2.01952	-3.31398	5e-05	0.0012271	yes
ENSDARG00000068995	zgc:101846	10:29930340-29931249	wt	mut	OK	184.548	123.15	307.698	-0.583585	-2.72781	5e-05	0.0012271	yes
ENSDARG00000092938	CR847906.1	4:35614905-35616087	wt	mut	OK	0.611884	1.92105	2.53293	1.65057	2.43165	0.00045	0.00770223	yes
ENSDARG00000093024	si:ch211-213a13.2	22:8979813-9066566	wt	mut	OK	0.785833	2.01383	2.79966	1.35765	4.07396	5e-05	0.0012271	yes
ENSDARG00000093041	si:ch211-234c11.2	4:47201549-47215183	wt	mut	OK	0.38337	1.19058	1.57395	1.63485	2.32498	0.0007	0.0109792	yes
ENSDARG00000094300	NUPR2	5:1732439-1734163	wt	mut	OK	44.6344	29.7758	74.4102	-0.584018	-2.10503	0.00025	0.0048518	yes
ENSDARG00000093126	si:ch73-112l6.1	21:22348488-22362349	wt	mut	OK	4.4407	2.09244	6.53314	-1.0856	-3.82812	5e-05	0.0012271	yes
ENSDARG00000020761	arrdc2	11:13466844-13476123	wt	mut	OK	7.90276	5.26363	13.1664	-0.586299	-1.87958	0.00115	0.0161047	yes
ENSDARG00000093176	zgc:77118	15:35257362-35268363	wt	mut	OK	2.83194	4.79073	7.62267	0.758452	1.75929	0.00315	0.034375	yes
ENSDARG00000034203	hist1h2ba	25:34543986-34544363	wt	mut	OK	457.416	304.558	761.974	-0.58679	-2.61418	5e-05	0.0012271	yes
ENSDARG00000093349	si:ch211-141e20.2	9:19870699-20052810	wt	mut	OK	2.56982	4.74373	7.31355	0.884354	1.80037	0.00265	0.0302985	yes
ENSDARG00000093354	si:ch211-57i17.2	20:46832961-46836207	wt	mut	OK	1.29142	2.85865	4.15007	1.14637	2.01553	0.0003	0.00565055	yes
ENSDARG00000057633	cxcr4a	6:12674100-12688869	wt	mut	OK	13.906	9.24665	23.1527	-0.588709	-2.07652	0.00025	0.0048518	yes
ENSDARG00000093402	si:dkey-286j17.4	22:9605487-9706368	wt	mut	OK	1.69927	0.0444221	1.74369	-5.25749	-2.93016	5e-05	0.0012271	yes
ENSDARG00000105355	si:ch1073-159d7.1	7:6321941-6322405	wt	mut	OK	2034.42	1352.15	3386.57	-0.589365	-2.83674	5e-05	0.0012271	yes
ENSDARG00000093478	si:ch211-152l15.2	4:48337864-48753889	wt	mut	OK	1.47038	7.94656	9.41694	2.43415	3.13259	5e-05	0.0012271	yes
ENSDARG00000051718	si:ch211-113a14.24	25:35818738-35819338	wt	mut	OK	24.375	16.1863	40.5613	-0.590636	-1.72556	0.00355	0.0377376	yes
ENSDARG00000093570	si:dkey-25o1.7	24:27341916-27344538	wt	mut	OK	1.19622	0	1.19622	#NAME?	#NAME?	5e-05	0.0012271	yes
ENSDARG00000093591	si:ch211-282k23.2	18:39947032-39948342	wt	mut	OK	0.848542	6.39611	7.24465	2.91414	4.78672	5e-05	0.0012271	yes
ENSDARG00000016011	gpcpd1	20:45765277-45819220	wt	mut	OK	17.1243	11.3663	28.4906	-0.591283	-2.37285	0.0001	0.00224065	yes
ENSDARG00000093656	si:dkeyp-2e4.6	13:44690444-44694168	wt	mut	OK	3.13694	6.82154	9.95848	1.12074	2.5894	0.0001	0.00224065	yes
ENSDARG00000093665	si:dkey-285e18.5	4:40304619-40312671	wt	mut	OK	0.709903	3.54002	4.24992	2.31806	3.18952	5e-05	0.0012271	yes
ENSDARG00000093699	si:ch73-27e22.4	22:8465913-8473433	wt	mut	OK	0.826515	0.0841614	0.910676	-3.29581	-1.45199	0.0022	0.0263587	yes
ENSDARG00000099664	2015-09-01	2:22697768-22707799	wt	mut	OK	183.148	121.546	304.694	-0.591506	-2.78175	5e-05	0.0012271	yes
ENSDARG00000009001	pdia6	20:31314615-31328243	wt	mut	OK	17.1563	11.3804	28.5367	-0.592182	-2.30961	5e-05	0.0012271	yes
ENSDARG00000093921	si:dkey-7b17.1	5:30122975-30127495	wt	mut	OK	3.1106	1.19644	4.30704	-1.37845	-2.96967	5e-05	0.0012271	yes
ENSDARG00000045352	cst14a.2	24:20776143-20777295	wt	mut	OK	52.9291	35.1062	88.0353	-0.592334	-2.25961	5e-05	0.0012271	yes
ENSDARG00000093998	si:ch73-7i4.2	9:28799305-28805690	wt	mut	OK	0.51721	1.75095	2.26816	1.75932	3.13463	5e-05	0.0012271	yes
ENSDARG00000016357	fmo5	20:15184947-15205206	wt	mut	OK	41.9544	27.7979	69.7523	-0.593848	-2.37706	5e-05	0.0012271	yes
ENSDARG00000020334	ptpn11a	10:3427889-3452371	wt	mut	OK	21.6635	14.3532	36.0167	-0.593896	-2.68088	5e-05	0.0012271	yes
ENSDARG00000094112	slc22a21	21:45866573-45881057	wt	mut	OK	0.306246	1.02677	1.33302	1.74536	2.03522	0.0007	0.0109792	yes
ENSDARG00000094131	ftr19	2:48090788-48097601	wt	mut	OK	4.89506	1.2741	6.16916	-1.94185	-3.12015	5e-05	0.0012271	yes
ENSDARG00000094142	si:dkey-261m5.1	6:17312077-17313236	wt	mut	OK	1.59527	3.13097	4.72624	0.97281	1.74078	0.00485	0.0472485	yes
ENSDARG00000094175	znf1027	4:43379770-43392479	wt	mut	OK	0.768865	5.05235	5.82121	2.71615	4.42686	5e-05	0.0012271	yes
ENSDARG00000094185	si:ch211-146g19.1	18:4663784-4664707	wt	mut	OK	2.03905	6.75498	8.79403	1.72806	2.41395	0.00065	0.0102791	yes
ENSDARG00000094210	zgc:109934	3:31993556-32009374	wt	mut	OK	0.813822	7.90663	8.72045	3.28028	4.62892	5e-05	0.0012271	yes
ENSDARG00000094281	si:ch73-196i15.3	8:20848762-20859966	wt	mut	OK	0.845385	3.65633	4.50171	2.11271	2.66323	5e-05	0.0012271	yes
ENSDARG00000094282	dnah11	16:19375375-19567491	wt	mut	OK	1.40118	0.859086	2.26027	-0.705769	-1.75868	0.00235	0.0276566	yes
ENSDARG00000079308	tor3a	8:16561426-16573292	wt	mut	OK	11.0114	7.29054	18.3019	-0.594901	-2.13101	0.0006	0.00968363	yes
ENSDARG00000094322	si:dkey-178e17.2	8:1920971-1925033	wt	mut	OK	3.11039	6.4278	9.53819	1.04723	1.63523	0.0047	0.0463102	yes
ENSDARG00000056438	her9	23:23472968-23474754	wt	mut	OK	31.4143	20.7524	52.1667	-0.598148	-2.40268	5e-05	0.0012271	yes
ENSDARG00000094396	si:dkey-202i12.5	16:29096058-29107478	wt	mut	OK	1.12553	2.78199	3.90752	1.30552	1.75446	0.0051	0.0489651	yes
ENSDARG00000094443	CT027609.1	4:55930461-55936210	wt	mut	OK	0.590671	1.88733	2.478	1.67592	2.5806	0.00035	0.00635637	yes
ENSDARG00000094466	si:ch73-199e17.1	9:7697592-7705611	wt	mut	OK	1.65198	3.94632	5.5983	1.25632	2.69544	5e-05	0.0012271	yes
ENSDARG00000001014	myh9b	3:5177801-5318329	wt	mut	OK	16.7591	11.0656	27.8247	-0.598865	-2.68503	5e-05	0.0012271	yes
ENSDARG00000079745	si:ch211-166a6.5	8:4377715-4451542	wt	mut	OK	42.0695	27.7264	69.7959	-0.601515	-2.26445	0.00055	0.00903729	yes
ENSDARG00000094523	si:dkey-258p11.1	5:9984298-9996046	wt	mut	OK	0.171361	1.75781	1.92917	3.35867	1.4903	0.00145	0.0191553	yes
ENSDARG00000094538	si:dkey-65l23.1	21:18830339-18854405	wt	mut	OK	3.98898	1.75155	5.74053	-1.18739	-1.95934	0.00115	0.0161047	yes
ENSDARG00000094554	si:ch73-7i4.1	9:28787830-28795968	wt	mut	OK	1.21298	4.40589	5.61887	1.86088	3.26026	5e-05	0.0012271	yes
ENSDARG00000062008	hs2st1b	6:26072245-26235179	wt	mut	OK	7.77592	5.12405	12.9	-0.601727	-1.81943	0.00105	0.0150587	yes
ENSDARG00000094558	si:dkeyp-53e4.1	4:42746118-42752729	wt	mut	OK	1.75868	4.45362	6.2123	1.34049	3.27897	5e-05	0.0012271	yes
ENSDARG00000094572	znf993	4:57437412-57455580	wt	mut	OK	2.5368	4.41993	6.95673	0.801011	1.9277	0.0011	0.0155943	yes
ENSDARG00000104825	trim35-7	3:5510484-5523471	wt	mut	OK	8.56942	5.64311	14.2125	-0.602707	-1.86449	0.0012	0.0166562	yes
ENSDARG00000094678	si:dkey-9i23.6	1:44083489-44095228	wt	mut	OK	0.587647	1.27371	1.86136	1.11602	2.05688	0.001	0.0144983	yes
ENSDARG00000094713	si:dkey-10b15.7p	10:34124018-34142489	wt	mut	OK	0.855411	1.70179	2.5572	0.992363	1.71449	0.0043	0.0433594	yes
ENSDARG00000036090	pard6gb	19:26115105-26188757	wt	mut	OK	22.4668	14.7853	37.2521	-0.603633	-2.66895	5e-05	0.0012271	yes
ENSDARG00000015866	apoa2	16:24063945-24065322	wt	mut	OK	312.439	205.553	517.992	-0.604063	-2.65269	5e-05	0.0012271	yes
ENSDARG00000094901	abcc6b.2	3:36602659-36682332	wt	mut	OK	2.14168	4.75979	6.90147	1.15215	3.81688	5e-05	0.0012271	yes
ENSDARG00000094902	znf1110	4:48885082-48944179	wt	mut	OK	0.807553	4.76836	5.57591	2.56186	2.80225	0.00095	0.0139255	yes
ENSDARG00000105345	zgc:173552	7:6293814-6294284	wt	mut	OK	589.093	387.345	976.438	-0.604876	-2.84434	5e-05	0.0012271	yes
ENSDARG00000058358	krt8	23:10314655-10319318	wt	mut	OK	781.679	513.741	1295.42	-0.605536	-2.67712	5e-05	0.0012271	yes
ENSDARG00000094994	si:dkey-106c17.2	3:38770698-38776895	wt	mut	OK	1.06015	2.50958	3.56973	1.24317	1.28396	0.0051	0.0489651	yes
ENSDARG00000095026	si:dkey-58f10.14	5:38054061-38059074	wt	mut	OK	1.30529	0.13998	1.44527	-3.22107	-1.99466	0.00395	0.0408569	yes
ENSDARG00000095150	si:dkey-114c15.5	5:22672692-22675535	wt	mut	OK	0.960876	3.45041	4.41129	1.84434	2.90887	5e-05	0.0012271	yes
ENSDARG00000095185	si:ch211-274p24.2	21:39247207-39254058	wt	mut	OK	2.11782	4.14163	6.25945	0.967622	2.03135	0.001	0.0144983	yes
ENSDARG00000095198	znf1132	4:56942126-56957453	wt	mut	OK	0.833505	2.44849	3.282	1.55463	2.38138	0.0006	0.00968363	yes
ENSDARG00000095200	si:ch211-197e7.1	4:47949686-47993284	wt	mut	OK	0.0591031	1.07912	1.13822	4.19048	4.29865	0.00075	0.0116365	yes
ENSDARG00000042688	bora	1:29919448-29930865	wt	mut	OK	11.5072	7.56065	19.0678	-0.60595	-1.6856	0.00405	0.0414933	yes
ENSDARG00000095280	si:dkey-222e15.4	23:38160540-38163123	wt	mut	OK	1.82494	4.55727	6.38221	1.32032	2.00965	0.0009	0.0133859	yes
ENSDARG00000095283	si:dkeyp-2e4.3	13:44703791-44706915	wt	mut	OK	2.25733	6.61672	8.87405	1.5515	3.91813	5e-05	0.0012271	yes
ENSDARG00000095288	rusc2	5:18797473-18825541	wt	mut	OK	2.798	1.56545	4.36345	-0.837814	-2.50147	5e-05	0.0012271	yes
ENSDARG00000095414	CR318589.1	4:50449783-50460351	wt	mut	OK	0.751893	2.90462	3.65651	1.94975	2.98588	5e-05	0.0012271	yes
ENSDARG00000102581	si:dkeyp-44b5.5	4:50684377-50754643	wt	mut	OK	14.0814	9.24426	23.3257	-0.607165	-1.61698	0.005	0.0482736	yes
ENSDARG00000103063	si:dkey-156c23.1	4:69786732-69942332	wt	mut	OK	12.407	8.1449	20.5519	-0.60718	-2.25841	0.0002	0.00399838	yes
ENSDARG00000095497	si:dkeyp-2e4.5	13:44694670-44697991	wt	mut	OK	3.63188	5.97158	9.60346	0.717396	1.7138	0.00335	0.036214	yes
ENSDARG00000095536	TRIM62 (1 of many)	11:39963607-39993080	wt	mut	OK	1.92156	0.564055	2.48562	-1.76837	-2.39997	0.0009	0.0133859	yes
ENSDARG00000017843	srsf1b	21:39523836-39581058	wt	mut	OK	47.0582	30.8811	77.9393	-0.60772	-2.52474	5e-05	0.0012271	yes
ENSDARG00000076766	zgc:163061	7:73598889-73599302	wt	mut	OK	80.2292	52.5226	132.752	-0.611189	-1.84125	0.00205	0.0250132	yes
ENSDARG00000042510	si:dkey-11e23.4	20:29032533-29035851	wt	mut	OK	14.1211	9.24302	23.3641	-0.611417	-2.10134	0.00065	0.0102791	yes
ENSDARG00000095696	trpm2	4:75445045-75465865	wt	mut	OK	0.836828	1.64711	2.48394	0.976931	1.41713	0.002	0.0245944	yes
ENSDARG00000095754	si:dkey-234h16.7	5:19458187-19459737	wt	mut	OK	6.20521	3.69221	9.89742	-0.748994	-1.97554	0.0007	0.0109792	yes
ENSDARG00000095789	ccr8.1	16:9530099-9534549	wt	mut	OK	0.84161	0.196804	1.03841	-2.09639	-2.88313	0.00025	0.0048518	yes
ENSDARG00000037618	ddit4	12:48356810-48358937	wt	mut	OK	53.8377	35.2167	89.0544	-0.612356	-2.60529	5e-05	0.0012271	yes
ENSDARG00000096000	si:dkey-29j8.2	4:42767874-42861428	wt	mut	OK	2.04865	6.98579	9.03444	1.76975	4.9084	5e-05	0.0012271	yes
ENSDARG00000096026	si:dkey-4e4.1	4:57489607-57495604	wt	mut	OK	1.29664	5.71608	7.01272	2.14024	3.95986	5e-05	0.0012271	yes
ENSDARG00000060962	btr04	7:15924873-15943187	wt	mut	OK	18.2407	11.9191	30.1598	-0.613882	-1.89725	0.0012	0.0166562	yes
ENSDARG00000096107	si:ch211-187d1.1	4:44413910-44422082	wt	mut	OK	1.33171	2.79793	4.12964	1.07108	1.82151	0.0029	0.0323424	yes
ENSDARG00000096166	si:dkey-29p23.2	4:43101524-43112992	wt	mut	OK	2.26648	0.705924	2.9724	-1.68287	-3.21481	5e-05	0.0012271	yes
ENSDARG00000070057	si:dkey-69o16.5	9:11616425-11624533	wt	mut	OK	8.07247	5.27381	13.3463	-0.614163	-1.62115	0.00465	0.0460014	yes
ENSDARG00000096217	si:dkey-51d8.9	4:44380152-44388931	wt	mut	OK	0.340194	1.68004	2.02023	2.30406	4.58819	5e-05	0.0012271	yes
ENSDARG00000096273	si:dkey-3n22.9	19:10875053-10910681	wt	mut	OK	4.97704	2.24671	7.22375	-1.14747	-2.37048	0.0003	0.00565055	yes
ENSDARG00000036235	zbtb3	14:35052421-35068457	wt	mut	OK	8.2185	5.36672	13.5852	-0.614835	-1.90036	0.00115	0.0161047	yes
ENSDARG00000105482	si:ch1073-153i20.1	7:6302304-6302727	wt	mut	OK	1254.78	817.813	2072.59	-0.617589	-2.84979	5e-05	0.0012271	yes
ENSDARG00000005619	nek2	20:13987150-13997930	wt	mut	OK	11.6849	7.60066	19.2856	-0.620442	-2.20386	0.0001	0.00224065	yes
ENSDARG00000096700	si:zfos-754c12.1	12:20371009-20378455	wt	mut	OK	5.15786	0.357822	5.51568	-3.84946	-6.89927	5e-05	0.0012271	yes
ENSDARG00000096708	si:dkeyp-104f11.8	20:47360687-47366798	wt	mut	OK	1.55933	3.24541	4.80474	1.05747	2.20125	0.0004	0.00703486	yes
ENSDARG00000034734	med6	13:36009289-36015654	wt	mut	OK	23.4259	15.2245	38.6504	-0.621708	-2.26787	5e-05	0.0012271	yes
ENSDARG00000038064	chmp3	17:43478193-43485742	wt	mut	OK	12.9767	8.43173	21.4084	-0.622027	-1.82979	0.0015	0.0196952	yes
ENSDARG00000038475	acy1	22:36772139-36852888	wt	mut	OK	11.1244	7.21132	18.3357	-0.625389	-2.01608	0.00035	0.00635637	yes
ENSDARG00000099491	tmem176l.1	16:46551397-46558439	wt	mut	OK	12.5613	8.14013	20.7014	-0.625861	-1.71554	0.00315	0.034375	yes
ENSDARG00000096861	si:dkey-234i14.20	25:36722752-36751522	wt	mut	OK	0.824535	2.0824	2.90693	1.33659	2.00862	0.0023	0.0272167	yes
ENSDARG00000057529	itpa	20:15045283-15053463	wt	mut	OK	50.7058	32.8412	83.547	-0.626644	-2.39781	5e-05	0.0012271	yes
ENSDARG00000096904	si:dkeyp-100a5.4	23:16504356-16599355	wt	mut	OK	1.50643	0.794806	2.30124	-0.922456	-1.68323	0.005	0.0482736	yes
ENSDARG00000069302	snx9b	20:43119307-43182422	wt	mut	OK	8.07047	5.2105	13.281	-0.631229	-1.60628	0.0025	0.0290455	yes
ENSDARG00000032039	mxd1	5:13206741-13266434	wt	mut	OK	9.91541	6.39682	16.3122	-0.632318	-1.89392	0.00075	0.0116365	yes
ENSDARG00000068886	mrpl14	13:42550141-42552981	wt	mut	OK	63.0547	40.6587	103.713	-0.633039	-2.39489	5e-05	0.0012271	yes
ENSDARG00000055917	nipa1	6:37767824-37771817	wt	mut	OK	9.98051	6.43406	16.4146	-0.633383	-1.71786	0.00345	0.0368791	yes
ENSDARG00000030514	acsl1a	1:16844513-16894615	wt	mut	OK	7.26659	4.68286	11.9494	-0.633888	-1.89794	0.00165	0.0211497	yes
ENSDARG00000030448	sppl2	2:37498211-37520552	wt	mut	OK	8.28142	5.33342	13.6148	-0.634818	-2.31565	5e-05	0.0012271	yes
ENSDARG00000013961	slc31a1	5:56658317-56684698	wt	mut	OK	14.8798	9.57679	24.4566	-0.635745	-2.77925	5e-05	0.0012271	yes
ENSDARG00000097202	si:ch211-141i4.3	1:30024424-30038816	wt	mut	OK	0.795723	0.0387999	0.834523	-4.35814	-1.61694	0.0003	0.00565055	yes
ENSDARG00000097205	ulk2	15:20907428-20959044	wt	mut	OK	3.32902	1.85841	5.18743	-0.84103	-2.17812	0.00025	0.0048518	yes
ENSDARG00000097222	si:dkey-181d19.5	16:42969981-42970951	wt	mut	OK	1.54716	3.49199	5.03915	1.17443	1.9497	0.0015	0.0196952	yes
ENSDARG00000020986	ctu1	8:3364402-3380735	wt	mut	OK	13.7613	8.85117	22.6125	-0.636674	-2.2244	0.0004	0.00703486	yes
ENSDARG00000097351	flnbl	11:41515297-41529899	wt	mut	OK	1.86434	3.86292	5.72726	1.05103	2.67692	5e-05	0.0012271	yes
ENSDARG00000097391	si:dkey-33c14.7	2:358891-359542	wt	mut	OK	2.23161	6.78034	9.01195	1.60328	2.05802	0.00305	0.0336026	yes
ENSDARG00000039605	mat1a	13:18497927-18506252	wt	mut	OK	11.5134	7.39992	18.9133	-0.637733	-2.35465	0.0001	0.00224065	yes
ENSDARG00000097518	si:ch211-205j18.1	6:36138809-36141954	wt	mut	OK	1.01801	4.74003	5.75804	2.21915	3.4563	5e-05	0.0012271	yes
ENSDARG00000097553	si:dkey-193e13.8	2:13115579-13120120	wt	mut	OK	0.393042	0.984719	1.37776	1.32503	2.0597	0.0015	0.0196952	yes
ENSDARG00000097615	si:ch211-108d22.2	3:14007243-14039176	wt	mut	OK	7.39911	1.55824	8.95735	-2.24743	-7.59216	5e-05	0.0012271	yes
ENSDARG00000097635	wu:fb18f06	15:46141931-46143819	wt	mut	OK	4.70014	1.49145	6.19159	-1.65599	-2.13189	5e-05	0.0012271	yes
ENSDARG00000041065	hspb1	5:3238283-3255083	wt	mut	OK	32.0601	20.5822	52.6423	-0.639379	-2.38477	5e-05	0.0012271	yes
ENSDARG00000097653	si:dkey-23k10.3	15:36492315-36511774	wt	mut	OK	0.161203	2.34995	2.51115	3.86568	2.85391	0.00125	0.0172117	yes
ENSDARG00000099510	cnn3a	24:31233150-31257636	wt	mut	OK	27.3375	17.5472	44.8847	-0.639636	-2.71084	5e-05	0.0012271	yes
ENSDARG00000097746	si:rp71-77l1.1	16:45121093-45127883	wt	mut	OK	1.74097	3.6696	5.41057	1.07573	1.77429	0.00305	0.0336026	yes
ENSDARG00000043797	cdc5l	17:4903019-4947809	wt	mut	OK	53.3643	34.2163	87.5806	-0.641192	-3.01886	5e-05	0.0012271	yes
ENSDARG00000021252	cct6a	21:41807148-41848869	wt	mut	OK	342.554	219.318	561.872	-0.643305	-2.91059	5e-05	0.0012271	yes
ENSDARG00000032575	ywhaz	19:12244899-12274094	wt	mut	OK	177.764	113.52	291.284	-0.647017	-3.08491	5e-05	0.0012271	yes
ENSDARG00000015947	matn4	6:52759103-52847865	wt	mut	OK	12.2296	7.80265	20.0322	-0.648336	-2.64296	5e-05	0.0012271	yes
ENSDARG00000021149	cbr1l	21:21596576-21604558	wt	mut	OK	52.5012	33.4247	85.9259	-0.651436	-2.85335	5e-05	0.0012271	yes
ENSDARG00000097878	si:ch73-376g11.3	16:48703198-48732600	wt	mut	OK	1.29192	3.2791	4.57102	1.34379	1.81986	0.0031	0.0340231	yes
ENSDARG00000097912	si:ch211-198e20.5	15:25085819-25091985	wt	mut	OK	0.883653	3.14172	4.02537	1.83	2.52284	0.00065	0.0102791	yes
ENSDARG00000097931	si:dkeyp-86b9.5	5:27682295-27686060	wt	mut	OK	2.39956	0	2.39956	#NAME?	#NAME?	5e-05	0.0012271	yes
ENSDARG00000096834	si:ch211-155k24.9	19:20607563-20614844	wt	mut	OK	6.14597	3.90991	10.0559	-0.652504	-2.6022	5e-05	0.0012271	yes
ENSDARG00000098036	si:ch211-69l10.4	24:10257478-10266411	wt	mut	OK	1.38485	0.567331	1.95218	-1.28747	-2.09356	0.001	0.0144983	yes
ENSDARG00000078186	tex2	3:55228649-55278160	wt	mut	OK	6.83125	4.34361	11.1749	-0.653256	-2.18138	0.00015	0.00315604	yes
ENSDARG00000092155	apoc2	16:24069722-24076129	wt	mut	OK	19.2613	12.2329	31.4942	-0.654934	-1.91707	0.00085	0.0128191	yes
ENSDARG00000098131	si:dkey-71e3.4	7:44518184-44618278	wt	mut	OK	1.90252	0.44986	2.35238	-2.08037	-2.14767	0.0036	0.0380348	yes
ENSDARG00000100223	si:zfos-1011f11.1	1:65690-72103	wt	mut	OK	34.2644	21.7473	56.0117	-0.655873	-2.0701	0.00045	0.00770223	yes
ENSDARG00000002285	mcoln1a	1:44979891-45008779	wt	mut	OK	15.0961	9.56857	24.6647	-0.657801	-2.96785	5e-05	0.0012271	yes
ENSDARG00000098204	CU984600.2	9:561484-582765	wt	mut	OK	0.480406	1.14332	1.62373	1.25091	3.85741	5e-05	0.0012271	yes
ENSDARG00000098209	si:ch211-199b20.3	14:49779238-49798951	wt	mut	OK	1.67759	2.75777	4.43536	0.717108	1.93241	0.00095	0.0139255	yes
ENSDARG00000077732	alyref	3:59589106-59599428	wt	mut	OK	73.3389	46.4689	119.808	-0.658314	-2.72666	5e-05	0.0012271	yes
ENSDARG00000079949	supt16h	7:1415255-1483171	wt	mut	OK	50.0818	31.7171	81.7989	-0.659023	-3.07604	5e-05	0.0012271	yes
ENSDARG00000098316	si:ch211-128b10.8	18:32047644-32052663	wt	mut	OK	3.50204	0	3.50204	#NAME?	#NAME?	5e-05	0.0012271	yes
ENSDARG00000100314	Metazoa_SRP	11:11457838-11458135	wt	mut	OK	1589.16	1004.49	2593.65	-0.661805	-3.10896	5e-05	0.0012271	yes
ENSDARG00000098389	znf1015	4:71921417-71930496	wt	mut	OK	0.865213	0.325233	1.19045	-1.41158	-2.53637	0.00015	0.00315604	yes
ENSDARG00000089039	zgc:173585	25:34630717-34631309	wt	mut	OK	183.596	116.031	299.627	-0.662022	-2.86375	5e-05	0.0012271	yes
ENSDARG00000099118	TRAPPC9	19:4208198-4411454	wt	mut	OK	6.70829	4.23763	10.9459	-0.662688	-2.25928	5e-05	0.0012271	yes
ENSDARG00000101840	U3	1:15765587-15765803	wt	mut	OK	9330.05	5889.14	15219.2	-0.663829	-3.11312	5e-05	0.0012271	yes
ENSDARG00000007377	odc1	17:51654872-51668516	wt	mut	OK	53.2048	33.5529	86.7577	-0.665117	-2.81753	5e-05	0.0012271	yes
ENSDARG00000098557	BX323564.1	2:10814210-10817351	wt	mut	OK	1.66342	0.280577	1.944	-2.56768	-4.45073	5e-05	0.0012271	yes
ENSDARG00000014793	ehd1b	10:27106537-27131321	wt	mut	OK	14.3534	9.04313	23.3965	-0.666496	-2.68396	5e-05	0.0012271	yes
ENSDARG00000098573	sgcd	21:35617272-35806729	wt	mut	OK	0.892063	0.319178	1.21124	-1.48278	-2.15165	0.00115	0.0161047	yes
ENSDARG00000098224	tmem56b	3:14238209-14302525	wt	mut	OK	6.16991	3.87768	10.0476	-0.670054	-2.4502	5e-05	0.0012271	yes
ENSDARG00000058354	selt1a	2:9886484-9898503	wt	mut	OK	41.7186	26.2071	67.9257	-0.670732	-2.81496	5e-05	0.0012271	yes
ENSDARG00000098608	si:dkey-224j12.6	11:6325742-6327047	wt	mut	OK	2.26126	4.42089	6.68215	0.96721	2.21075	0.0002	0.00399838	yes
ENSDARG00000098655	KIF1C	5:67527170-67580786	wt	mut	OK	3.32912	2.44416	5.77328	-0.445802	-1.64506	0.0041	0.0418812	yes
ENSDARG00000001939	b3gat3	7:24743993-24758104	wt	mut	OK	10.9383	6.86667	17.805	-0.671709	-1.88206	0.00085	0.0128191	yes
ENSDARG00000098714	si:dkeyp-82b4.2	4:37441708-37579847	wt	mut	OK	5.23386	2.08627	7.32013	-1.32695	-2.90837	5e-05	0.0012271	yes
ENSDARG00000014506	tmem126a	10:29383449-29386082	wt	mut	OK	36.8788	23.1504	60.0292	-0.671755	-2.39736	0.00015	0.00315604	yes
ENSDARG00000098779	BX547930.1	20:12934467-12938769	wt	mut	OK	1.3377	0.7699	2.1076	-0.797017	-1.94013	0.00145	0.0191553	yes
ENSDARG00000098839	BX640584.2	4:50505375-50515992	wt	mut	OK	3.22457	5.35976	8.58433	0.733064	2.23703	0.00045	0.00770223	yes
ENSDARG00000098867	PRDM15	10:33325510-33357665	wt	mut	OK	5.7935	4.07363	9.86713	-0.508121	-1.81041	0.0021	0.0254612	yes
ENSDARG00000008247	vezf1a	10:37139888-37183005	wt	mut	OK	8.07	5.03498	13.105	-0.680583	-2.10474	0.0004	0.00703486	yes
ENSDARG00000071906	sec24b	14:1106159-1142311	wt	mut	OK	6.34132	3.95572	10.297	-0.680842	-1.72592	0.00035	0.00635637	yes
ENSDARG00000059360	srsf3b	22:575529-585244	wt	mut	OK	183.921	114.241	298.162	-0.687006	-3.17821	5e-05	0.0012271	yes
ENSDARG00000063446	iba57	2:3585503-3588711	wt	mut	OK	12.6648	7.86664	20.5314	-0.687009	-2.23566	0.00015	0.00315604	yes
ENSDARG00000098988	si:ch211-193i15.1	11:39944093-39951409	wt	mut	OK	1.23874	2.50736	3.7461	1.0173	1.99895	0.0014	0.0186807	yes
ENSDARG00000102874	immt	14:15788325-15818017	wt	mut	OK	9.4089	5.84103	15.2499	-0.687803	-2.59075	5e-05	0.0012271	yes
ENSDARG00000099044	si:ch211-199m8.2	11:29319571-29324354	wt	mut	OK	0	1.16359	1.16359	inf	#NAME?	5e-05	0.0012271	yes
ENSDARG00000099060	zgc:111868	12:42208867-42213007	wt	mut	OK	0.994722	0.454548	1.44927	-1.12986	-2.01972	0.0009	0.0133859	yes
ENSDARG00000098595	zgc:195633	7:6309626-6310355	wt	mut	OK	753.008	466.527	1219.54	-0.690704	-3.00577	5e-05	0.0012271	yes
ENSDARG00000076930	si:dkey-261m9.9	25:34632121-34632433	wt	mut	OK	1599.7	989.204	2588.9	-0.693459	-3.26256	5e-05	0.0012271	yes
ENSDARG00000012076	apoa1a	5:37378347-37397635	wt	mut	OK	472.249	291.77	764.019	-0.694719	-2.88443	5e-05	0.0012271	yes
ENSDARG00000102055	hadhb	20:48463478-48555271	wt	mut	OK	34.7365	21.3628	56.0993	-0.701349	-2.52188	5e-05	0.0012271	yes
ENSDARG00000070047	rgs4	6:35378841-35383561	wt	mut	OK	9.61247	5.90167	15.5141	-0.703784	-2.44496	5e-05	0.0012271	yes
ENSDARG00000074456	SETD9	10:2657750-2667325	wt	mut	OK	6.2395	3.82878	10.0683	-0.704545	-1.64414	0.00485	0.0472485	yes
ENSDARG00000102482	CYSTM1 (1 of many)	21:31988013-32003396	wt	mut	OK	10.1279	6.21454	16.3424	-0.70462	-1.8648	0.0014	0.0186807	yes
ENSDARG00000099172	BX000701.2	3:6979706-6989752	wt	mut	OK	0.747903	1.86152	2.60942	1.31556	1.93283	0.00345	0.0368791	yes
ENSDARG00000016200	trib3	11:23820672-23825339	wt	mut	OK	24.1506	14.8184	38.969	-0.704671	-2.96331	5e-05	0.0012271	yes
ENSDARG00000099197	actc1b	17:117123-124703	wt	mut	OK	1.48827	0.348867	1.83714	-2.09289	-2.51726	0.0011	0.0155943	yes
ENSDARG00000099201	BX908731.1	22:17813934-17819139	wt	mut	OK	2.64659	1.09719	3.74378	-1.27033	-3.74673	5e-05	0.0012271	yes
ENSDARG00000099242	BX255935.1	4:59321031-59334653	wt	mut	OK	4.18435	1.99403	6.17838	-1.06932	-2.39647	0.00015	0.00315604	yes
ENSDARG00000056381	cfap97	1:16988106-17000336	wt	mut	OK	7.59309	4.65546	12.2485	-0.705762	-2.26679	0.0001	0.00224065	yes
ENSDARG00000071589	si:dkey-253d23.2	22:9801946-9839025	wt	mut	OK	11.3711	6.94037	18.3115	-0.712292	-2.1696	0.00045	0.00770223	yes
ENSDARG00000103689	znf1148	4:41610766-41629634	wt	mut	OK	12.3071	7.50976	19.8169	-0.712648	-1.69877	0.00465	0.0460014	yes
ENSDARG00000104311	scmh1	16:35603025-35634437	wt	mut	OK	8.28249	5.04891	13.3314	-0.714092	-1.71678	0.0025	0.0290455	yes
ENSDARG00000044544	zgc:110782	21:27156067-27158628	wt	mut	OK	8.17841	4.98411	13.1625	-0.714483	-1.93455	0.00065	0.0102791	yes
ENSDARG00000099350	si:ch211-283l16.1	4:63321675-63328191	wt	mut	OK	1.67432	0.320966	1.99529	-2.38308	-3.66036	5e-05	0.0012271	yes
ENSDARG00000079932	zgc:152830	8:41196715-41248225	wt	mut	OK	47.6837	29.0264	76.7101	-0.716132	-2.30435	0.0001	0.00224065	yes
ENSDARG00000099359	BX649497.2	4:61939486-61944981	wt	mut	OK	1.533	0.912052	2.44505	-0.749165	-2.03504	0.00085	0.0128191	yes
ENSDARG00000099364	BX511034.4	22:7492684-7505123	wt	mut	OK	0.819141	3.68759	4.50673	2.17049	4.26747	5e-05	0.0012271	yes
ENSDARG00000101578	e2f4	25:17308795-17322697	wt	mut	OK	19.5858	11.9217	31.5075	-0.716217	-2.75132	5e-05	0.0012271	yes
ENSDARG00000016093	qtrtd1	24:20915266-20946098	wt	mut	OK	14.0709	8.55944	22.6303	-0.717124	-2.634	5e-05	0.0012271	yes
ENSDARG00000099465	rnf213a	3:56631748-56746324	wt	mut	OK	1.18104	0.685811	1.86685	-0.784172	-2.69276	5e-05	0.0012271	yes
ENSDARG00000099476	zgc:174863	6:22792234-22799889	wt	mut	OK	3.75715	1.93288	5.69003	-0.958882	-2.19138	0.0003	0.00565055	yes
ENSDARG00000069241	ttc32	20:43849444-43853693	wt	mut	OK	18.3916	11.1776	29.5692	-0.718435	-2.13914	0.00015	0.00315604	yes
ENSDARG00000099509	btr23	19:4102388-4116647	wt	mut	OK	1.06828	1.83426	2.90254	0.779917	1.63074	0.0046	0.0456114	yes
ENSDARG00000101324	apoa1b	15:31388-33853	wt	mut	OK	350.442	212.515	562.957	-0.721609	-3.29745	5e-05	0.0012271	yes
ENSDARG00000099511	CABZ01034698.4	22:7866225-8063981	wt	mut	OK	2.37697	0.782687	3.15966	-1.60262	-2.77497	5e-05	0.0012271	yes
ENSDARG00000099585	si:dkeyp-4c4.2	4:35520031-35557230	wt	mut	OK	0.47253	1.46339	1.93592	1.63084	3.04527	5e-05	0.0012271	yes
ENSDARG00000099621	si:ch211-69b22.5	14:31731460-31807887	wt	mut	OK	3.9721	2.90763	6.87973	-0.450058	-1.68646	0.00365	0.0384219	yes
ENSDARG00000011405	rps9	16:31966475-31969065	wt	mut	OK	2169.71	1313.67	3483.38	-0.723901	-3.06886	5e-05	0.0012271	yes
ENSDARG00000019236	gsr	14:38512654-38532831	wt	mut	OK	41.7766	25.291	67.0676	-0.724071	-2.17482	0.00035	0.00635637	yes
ENSDARG00000043720	cdc45	8:4677737-4704456	wt	mut	OK	22.0672	13.3537	35.4209	-0.724662	-3.00586	5e-05	0.0012271	yes
ENSDARG00000099681	BX548173.1	4:31528899-31537743	wt	mut	OK	2.84822	1.58095	4.42917	-0.849274	-2.47582	0.0001	0.00224065	yes
ENSDARG00000099695	si:dkey-61n16.5	3:13762103-13771327	wt	mut	OK	0.0511879	2.47402	2.52521	5.59491	1.61778	0.00025	0.0048518	yes
ENSDARG00000099697	zgc:174696	4:41523878-41533091	wt	mut	OK	2.17853	1.00082	3.17935	-1.12218	-2.2867	0.0002	0.00399838	yes
ENSDARG00000099699	si:dkey-11n14.2	4:31118959-31131568	wt	mut	OK	0.951288	2.58056	3.53185	1.43973	2.6428	0.00025	0.0048518	yes
ENSDARG00000053840	ei24	10:39272733-39287976	wt	mut	OK	6.43025	3.88118	10.3114	-0.728378	-2.33747	5e-05	0.0012271	yes
ENSDARG00000028688	exosc2	5:71352824-71358786	wt	mut	OK	35.4814	21.4119	56.8933	-0.728653	-2.76444	5e-05	0.0012271	yes
ENSDARG00000086112	si:ch211-266i6.3	10:32107045-32114218	wt	mut	OK	27.9598	16.8644	44.8242	-0.729368	-3.17544	5e-05	0.0012271	yes
ENSDARG00000099764	si:dkey-74i1.3	15:32849790-32851666	wt	mut	OK	5.94375	2.11081	8.05456	-1.49358	-2.7844	5e-05	0.0012271	yes
ENSDARG00000099802	pnp5b	2:58258162-58272505	wt	mut	OK	2.58609	5.12599	7.71208	0.98706	2.21779	0.00015	0.00315604	yes
ENSDARG00000097650	atg2b	17:43014889-43021852	wt	mut	OK	6.83258	4.11794	10.9505	-0.730507	-2.08123	0.00045	0.00770223	yes
ENSDARG00000029795	fam213b	11:40358164-40383092	wt	mut	OK	31.6526	19.0674	50.72	-0.731212	-2.39824	0.0001	0.00224065	yes
ENSDARG00000069318	efr3bb	20:42984025-43081269	wt	mut	OK	15.3863	9.25284	24.6391	-0.733682	-1.74334	0.00205	0.0250132	yes
ENSDARG00000099902	si:ch211-210k13.2	11:36983633-37008024	wt	mut	OK	1.6421	5.4228	7.0649	1.7235	3.3908	5e-05	0.0012271	yes
ENSDARG00000090871	si:dkey-210j14.4	3:52413035-52419455	wt	mut	OK	8.50714	5.10789	13.615	-0.735948	-1.92762	0.00045	0.00770223	yes
ENSDARG00000002216	tbx3a	5:71409978-71624237	wt	mut	OK	8.79308	5.27345	14.0665	-0.737621	-1.83357	0.00135	0.0182536	yes
ENSDARG00000054103	ripply1	21:37919750-37926113	wt	mut	OK	10.3674	6.21338	16.5808	-0.7386	-2.07216	0.00035	0.00635637	yes
ENSDARG00000099978	CABZ01078427.1	16:47312644-47333356	wt	mut	OK	1.98053	3.36698	5.34751	0.765572	2.00635	0.00025	0.0048518	yes
ENSDARG00000099982	ccl39.7	25:12828643-12838581	wt	mut	OK	2.68974	0	2.68974	#NAME?	#NAME?	5e-05	0.0012271	yes
ENSDARG00000100040	AL845295.3	4:40173383-40181532	wt	mut	OK	1.67888	4.02517	5.70405	1.26155	2.4121	0.0001	0.00224065	yes
ENSDARG00000100068	BX936350.1	4:52164710-52179929	wt	mut	OK	0.972574	0.524876	1.49745	-0.88983	-1.72564	0.0047	0.0463102	yes
ENSDARG00000013561	pgm1	6:32023268-32038311	wt	mut	OK	7.09947	4.25396	11.3534	-0.738904	-2.28264	5e-05	0.0012271	yes
ENSDARG00000099243	CR855389.1	15:32885185-32889721	wt	mut	OK	13.7885	8.22964	22.0181	-0.744567	-3.20888	5e-05	0.0012271	yes
ENSDARG00000037837	ogfr	23:565424-575455	wt	mut	OK	7.67006	4.57724	12.2473	-0.744762	-2.96635	5e-05	0.0012271	yes
ENSDARG00000035602	dao.1	5:19684637-19691550	wt	mut	OK	22.9006	13.6611	36.5617	-0.745308	-2.80888	5e-05	0.0012271	yes
ENSDARG00000100133	lect1	9:54185532-54206826	wt	mut	OK	1.11871	4.79168	5.91039	2.0987	3.94313	5e-05	0.0012271	yes
ENSDARG00000100150	FQ377903.2	9:155919-157205	wt	mut	OK	0.495146	1.42656	1.92171	1.52661	2.12218	0.00215	0.025958	yes
ENSDARG00000100154	si:ch73-104f13.3	11:42281679-42282420	wt	mut	OK	5.90117	2.32838	8.22955	-1.34168	-2.52099	0.0001	0.00224065	yes
ENSDARG00000100164	si:dkey-16p6.1	4:74860136-74884569	wt	mut	OK	1.64432	0.304341	1.94866	-2.43373	-3.09763	0.0001	0.00224065	yes
ENSDARG00000100207	CR792418.1	4:38423640-38429412	wt	mut	OK	5.39768	2.17672	7.5744	-1.31018	-3.30262	5e-05	0.0012271	yes
ENSDARG00000100213	CR388052.1	4:57886404-57895140	wt	mut	OK	0.689516	4.8383	5.52782	2.81084	6.53514	5e-05	0.0012271	yes
ENSDARG00000104687	slc16a9b	12:7555067-7573326	wt	mut	OK	15.9027	9.42969	25.3324	-0.753993	-3.05265	5e-05	0.0012271	yes
ENSDARG00000100231	ccdc135	25:13635141-13648406	wt	mut	OK	0.976703	1.81243	2.78913	0.891938	2.07793	0.00065	0.0102791	yes
ENSDARG00000100257	zgc:174314	4:55789087-55803146	wt	mut	OK	2.20528	4.78821	6.99349	1.11853	2.85111	5e-05	0.0012271	yes
ENSDARG00000101547	CR354395.1	12:13515426-13518233	wt	mut	OK	15.4695	9.16068	24.6302	-0.7559	-3.07245	5e-05	0.0012271	yes
ENSDARG00000100296	pja2	5:56540019-56563901	wt	mut	OK	3.75404	2.37617	6.13021	-0.659807	-1.84135	0.0014	0.0186807	yes
ENSDARG00000008472	apex2	8:22489567-22493679	wt	mut	OK	11.4906	6.78958	18.2802	-0.759059	-2.62894	5e-05	0.0012271	yes
ENSDARG00000007975	fth1b	25:2933070-2940214	wt	mut	OK	7.11026	4.18962	11.2999	-0.763085	-2.21112	5e-05	0.0012271	yes
ENSDARG00000100333	FO818712.1	7:71156955-71164331	wt	mut	OK	0.197262	2.58933	2.78659	3.7144	5.85205	5e-05	0.0012271	yes
ENSDARG00000100400	si:ch1073-435i13.1	11:31362110-31408417	wt	mut	OK	4.09747	2.52253	6.62	-0.699864	-2.39412	5e-05	0.0012271	yes
ENSDARG00000100406	ITIH4 (1 of many)	11:36933894-36962328	wt	mut	OK	1.89814	4.38592	6.28406	1.20829	1.78384	0.00105	0.0150587	yes
ENSDARG00000070479	tspan13b	19:30800668-30811898	wt	mut	OK	11.19	6.57952	17.7695	-0.766153	-2.53896	5e-05	0.0012271	yes
ENSDARG00000056075	rca2.1	23:26167939-26193747	wt	mut	OK	13.3773	7.84964	21.2269	-0.769093	-2.82064	5e-05	0.0012271	yes
ENSDARG00000100471	CT573263.3	4:64931251-64947206	wt	mut	OK	6.26657	2.32038	8.58695	-1.43331	-4.88698	5e-05	0.0012271	yes
ENSDARG00000100477	CR792418.2	4:38414613-38416019	wt	mut	OK	5.06593	2.69836	7.76429	-0.908746	-2.24313	0.0001	0.00224065	yes
ENSDARG00000059474	mlxip	5:66637446-66671547	wt	mut	OK	7.17194	4.17755	11.3495	-0.779704	-3.24333	5e-05	0.0012271	yes
ENSDARG00000100499	CPEB4 (1 of many)	21:41452319-41508809	wt	mut	OK	3.57766	2.37155	5.94921	-0.593187	-1.89533	0.0008	0.012247	yes
ENSDARG00000100518	ARAP2	7:63961240-64173170	wt	mut	OK	1.77071	3.10386	4.87457	0.809734	2.67345	5e-05	0.0012271	yes
ENSDARG00000030765	hadh	1:49265845-49275216	wt	mut	OK	50.2618	29.2377	79.4995	-0.781633	-3.36616	5e-05	0.0012271	yes
ENSDARG00000100543	CT573234.3	4:65799259-65808705	wt	mut	OK	4.74778	1.76671	6.51449	-1.42618	-4.19092	5e-05	0.0012271	yes
ENSDARG00000034777	txn2	3:5355259-5367200	wt	mut	OK	21.2741	12.3713	33.6454	-0.782097	-2.74194	5e-05	0.0012271	yes
ENSDARG00000075616	polr2k	19:12058680-12062120	wt	mut	OK	187.42	108.965	296.385	-0.782406	-3.01645	5e-05	0.0012271	yes
ENSDARG00000100602	CR388166.1	21:25613640-25617746	wt	mut	OK	0.817599	0.410632	1.22823	-0.993548	-1.96771	0.00155	0.0201828	yes
ENSDARG00000055966	cflara	11:30085774-30094247	wt	mut	OK	9.65438	5.61075	15.2651	-0.78299	-2.41914	5e-05	0.0012271	yes
ENSDARG00000061600	tmem2	5:25160000-25213470	wt	mut	OK	18.6441	10.825	29.4691	-0.784356	-2.53652	5e-05	0.0012271	yes
ENSDARG00000100691	prss35	16:32889284-33050822	wt	mut	OK	2.66277	1.43613	4.0989	-0.890736	-2.01783	0.0011	0.0155943	yes
ENSDARG00000100698	eva1bb	19:3929222-3931416	wt	mut	OK	1.63991	0.887824	2.52773	-0.885271	-1.8128	0.0026	0.0298455	yes
ENSDARG00000105097	Metazoa_SRP	11:11400211-11400509	wt	mut	OK	7676.69	4444.22	12120.9	-0.788553	-3.79627	5e-05	0.0012271	yes
ENSDARG00000004647	spice1	24:21185625-21199022	wt	mut	OK	6.70522	3.88042	10.5856	-0.789074	-2.58617	5e-05	0.0012271	yes
ENSDARG00000087544	BX510934.1	4:55439550-55441277	wt	mut	OK	7.49	4.3323	11.8223	-0.789831	-1.80851	0.00315	0.034375	yes
ENSDARG00000075536	cpne1	11:26138362-26164078	wt	mut	OK	37.9086	21.8393	59.7479	-0.795596	-1.86411	0.0005	0.00833478	yes
ENSDARG00000100792	zgc:154142	1:50150869-50194361	wt	mut	OK	0.83145	0.25851	1.08996	-1.68541	-2.70263	5e-05	0.0012271	yes
ENSDARG00000100821	scrt1a	19:1626606-1629639	wt	mut	OK	0.983154	1.96183	2.94498	0.996709	2.23725	0.0004	0.00703486	yes
ENSDARG00000094504	plekha1b	12:11458430-11555816	wt	mut	OK	7.02727	4.04478	11.0721	-0.796905	-1.95432	0.0006	0.00968363	yes
ENSDARG00000053263	zgc:113372	17:49537351-49542461	wt	mut	OK	9.72624	5.59781	15.324	-0.79702	-2.41867	0.0001	0.00224065	yes
ENSDARG00000089044	si:ch211-113a14.10	25:35783062-35783374	wt	mut	OK	167.948	96.2467	264.195	-0.803204	-2.5502	5e-05	0.0012271	yes
ENSDARG00000097839	si:ch211-235i11.6	17:50354780-50357130	wt	mut	OK	7.53332	4.31663	11.8499	-0.803381	-2.23283	0.0003	0.00565055	yes
ENSDARG00000102265	smarcal1	9:52812378-52951072	wt	mut	OK	9.24305	5.2921	14.5351	-0.804529	-1.74987	0.0022	0.0263587	yes
ENSDARG00000100959	si:dkey-3p4.7	4:36888323-36894231	wt	mut	OK	1.36546	0.562681	1.92814	-1.279	-1.79967	0.00185	0.0231458	yes
ENSDARG00000100981	CCDC39	2:7870826-7898610	wt	mut	OK	2.49035	4.6251	7.11545	0.893139	2.60339	5e-05	0.0012271	yes
ENSDARG00000100718	me2	5:6233723-6281739	wt	mut	OK	10.1752	5.79822	15.9734	-0.81137	-2.59774	5e-05	0.0012271	yes
ENSDARG00000101048	si:ch1073-154p7.1	11:2545715-2546669	wt	mut	OK	0	1.27996	1.27996	inf	#NAME?	5e-05	0.0012271	yes
ENSDARG00000101072	cnot6b	14:49747036-49777505	wt	mut	OK	1.74923	3.45159	5.20082	0.980545	3.6545	5e-05	0.0012271	yes
ENSDARG00000101079	HECTD4	7:72168934-72278814	wt	mut	OK	4.27174	2.86407	7.13581	-0.576757	-2.39954	5e-05	0.0012271	yes
ENSDARG00000099358	hccsb	24:31144687-31155500	wt	mut	OK	17.5083	9.95732	27.4656	-0.814208	-2.59973	5e-05	0.0012271	yes
ENSDARG00000101091	BX322597.1	4:30004926-30011300	wt	mut	OK	3.89433	5.55718	9.45151	0.512977	1.62251	0.0048	0.0469203	yes
ENSDARG00000101145	lipeb	16:26207922-26258680	wt	mut	OK	3.39645	2.16496	5.56141	-0.649686	-1.82715	0.00165	0.0211497	yes
ENSDARG00000101149	CABZ01001464.1	4:30662756-30668776	wt	mut	OK	2.13258	0.302501	2.43508	-2.81759	-2.70972	0.00145	0.0191553	yes
ENSDARG00000104099	si:ch73-144l3.2	3:6317623-6325842	wt	mut	OK	9.23334	5.23595	14.4693	-0.8184	-2.11726	0.0005	0.00833478	yes
ENSDARG00000102492	Metazoa_SRP	11:15905881-16189940	wt	mut	OK	90601.1	51375.9	141977	-0.818436	-2.84941	5e-05	0.0012271	yes
ENSDARG00000104964	znf1093	4:37854535-37859835	wt	mut	OK	8.99042	5.0952	14.0856	-0.81925	-2.39249	5e-05	0.0012271	yes
ENSDARG00000101187	si:dkey-53k12.48	2:48877017-48959856	wt	mut	OK	1.43637	0.116678	1.55305	-3.62183	-3.50275	0.00325	0.0352878	yes
ENSDARG00000096990	si:ch1073-340i21.2	15:46129707-46140445	wt	mut	OK	36.2698	20.5515	56.8213	-0.819524	-2.40349	5e-05	0.0012271	yes
ENSDARG00000101239	hsd17b4	8:190534-214498	wt	mut	OK	1.85076	1.08747	2.93823	-0.767141	-1.75348	0.0031	0.0340231	yes
ENSDARG00000043457	gapdh	16:17284686-17292143	wt	mut	OK	79.1611	44.7221	123.883	-0.823805	-3.57927	5e-05	0.0012271	yes
ENSDARG00000101160	apoa4a	19:10927027-10931909	wt	mut	OK	23.1194	13.0171	36.1365	-0.828694	-2.63615	5e-05	0.0012271	yes
ENSDARG00000101275	si:dkey-117a16.1	6:36303110-36307217	wt	mut	OK	1.56161	3.34202	4.90363	1.09769	1.63913	0.0009	0.0133859	yes
ENSDARG00000093058	si:dkey-13i19.8	4:16794797-16835301	wt	mut	OK	17.1275	9.62262	26.7501	-0.831816	-2.50315	0.0001	0.00224065	yes
ENSDARG00000101292	si:dkey-201g16.1	4:51029422-51036835	wt	mut	OK	2.30095	0.784507	3.08546	-1.55237	-2.63841	5e-05	0.0012271	yes
ENSDARG00000089836	MRPS12	21:25524678-25528787	wt	mut	OK	36.8381	20.6873	57.5254	-0.832454	-2.9187	5e-05	0.0012271	yes
ENSDARG00000040298	apoa4b.1	16:23999037-24033538	wt	mut	OK	50.3371	28.1988	78.5359	-0.835985	-2.45848	5e-05	0.0012271	yes
ENSDARG00000101327	znf1076	4:67885033-67891228	wt	mut	OK	1.0707	2.26907	3.33977	1.08354	1.87962	0.0011	0.0155943	yes
ENSDARG00000101364	wfikkn1	1:58863070-58865313	wt	mut	OK	2.80474	4.39374	7.19848	0.647584	1.8495	0.0015	0.0196952	yes
ENSDARG00000101393	si:dkey-31g6.6	6:21892726-21895018	wt	mut	OK	5.61047	2.00805	7.61852	-1.48232	-2.3453	0.00035	0.00635637	yes
ENSDARG00000061370	tsen34	18:41552349-41557126	wt	mut	OK	17.273	9.66418	26.9372	-0.837803	-2.8805	5e-05	0.0012271	yes
ENSDARG00000101451	CABZ01033540.1	4:68454151-68461979	wt	mut	OK	6.5595	2.89707	9.45657	-1.17899	-3.28902	5e-05	0.0012271	yes
ENSDARG00000030723	cldn11b	24:26287499-26296277	wt	mut	OK	7.90676	4.32879	12.2355	-0.869123	-2.83796	5e-05	0.0012271	yes
ENSDARG00000101478	plppr2a	3:14151273-14223980	wt	mut	OK	2.41744	1.43456	3.852	-0.752871	-1.77878	0.0024	0.0281108	yes
ENSDARG00000101502	CR753816.1	25:30362087-30365981	wt	mut	OK	1.79	0.734384	2.52438	-1.28536	-3.1033	5e-05	0.0012271	yes
ENSDARG00000102822	pam16	3:12192336-12199850	wt	mut	OK	13.5261	7.4047	20.9308	-0.869235	-2.05499	0.0003	0.00565055	yes
ENSDARG00000105384	si:dkey-23a13.22	7:5856059-5857076	wt	mut	OK	454.664	248.569	703.233	-0.871156	-4.18997	5e-05	0.0012271	yes
ENSDARG00000101514	ftr64	4:70704403-70713219	wt	mut	OK	0.226317	1.36555	1.59187	2.59307	3.51622	5e-05	0.0012271	yes
ENSDARG00000101523	FO704863.2	21:40647988-40653375	wt	mut	OK	1.20471	3.41293	4.61764	1.50232	3.35605	5e-05	0.0012271	yes
ENSDARG00000101539	znf997	4:60433688-60461460	wt	mut	OK	3.69665	1.60839	5.30504	-1.2006	-2.36692	0.0004	0.00703486	yes
ENSDARG00000075508	si:dkey-108k21.10	25:34545426-34546047	wt	mut	OK	57.6458	31.4537	89.0995	-0.873987	-3.13154	5e-05	0.0012271	yes
ENSDARG00000101556	si:ch1073-475a24.1	5:7741964-7747504	wt	mut	OK	1.33096	0.106458	1.43742	-3.64412	-2.92285	0.0044	0.0442127	yes
ENSDARG00000101562	znf1014	2:195957-204848	wt	mut	OK	3.09799	5.66207	8.76006	0.869997	3.22769	5e-05	0.0012271	yes
ENSDARG00000101024	nufip1	6:59739184-59746399	wt	mut	OK	16.9731	9.23286	26.206	-0.878404	-3.12803	5e-05	0.0012271	yes
ENSDARG00000101613	si:dkey-238i5.2	11:31022066-31057557	wt	mut	OK	0.433224	1.13362	1.56684	1.38775	3.13552	5e-05	0.0012271	yes
ENSDARG00000101623	znf992	4:35815349-36120033	wt	mut	OK	5.38782	1.21047	6.59829	-2.15413	-3.10738	5e-05	0.0012271	yes
ENSDARG00000071013	arl6ip6	6:13114312-13142615	wt	mut	OK	13.1831	7.16703	20.3501	-0.879244	-2.56755	5e-05	0.0012271	yes
ENSDARG00000101690	si:ch73-158p21.2	4:74768855-74780919	wt	mut	OK	1.04624	1.82697	2.87321	0.804238	1.58746	0.0034	0.0365712	yes
ENSDARG00000045898	si:ch211-152c2.3	4:828561-831585	wt	mut	OK	8.40376	4.54744	12.9512	-0.885983	-2.11016	0.00055	0.00903729	yes
ENSDARG00000095594	si:dkey-184a18.5	10:16103535-16109075	wt	mut	OK	7.08868	3.82604	10.9147	-0.889665	-1.99496	0.00075	0.0116365	yes
ENSDARG00000019949	serpinh1b	15:29450291-29454673	wt	mut	OK	235.543	127.11	362.653	-0.88991	-3.69686	5e-05	0.0012271	yes
ENSDARG00000101765	Metazoa_SRP	11:11369837-11397266	wt	mut	OK	0	5.86936	5.86936	inf	#NAME?	5e-05	0.0012271	yes
ENSDARG00000101791	ccbl2	6:25114124-25166249	wt	mut	OK	0.902459	1.87515	2.77761	1.05507	1.56727	0.0017	0.0216618	yes
ENSDARG00000101795	CABZ01033394.1	13:5904445-5909866	wt	mut	OK	0.962146	0.30408	1.26623	-1.6618	-3.45019	5e-05	0.0012271	yes
ENSDARG00000101797	CT737127.2	4:66064981-66116330	wt	mut	OK	4.49699	2.02675	6.52374	-1.14979	-2.57058	5e-05	0.0012271	yes
ENSDARG00000025033	stx5a	14:8288252-8310549	wt	mut	OK	8.36531	4.5132	12.8785	-0.890268	-3.32629	5e-05	0.0012271	yes
ENSDARG00000040439	rsl24d1	25:446957-452320	wt	mut	OK	306.255	164.904	471.159	-0.893104	-4.26694	5e-05	0.0012271	yes
ENSDARG00000044142	acss1	17:25815555-25835531	wt	mut	OK	16.0661	8.59359	24.6597	-0.902689	-3.13972	5e-05	0.0012271	yes
ENSDARG00000101843	znf1106	4:62361899-62369289	wt	mut	OK	3.44853	1.88246	5.33099	-0.873361	-1.91549	0.002	0.0245944	yes
ENSDARG00000103741	BX649620.1	4:31108575-31118245	wt	mut	OK	13.9048	7.4362	21.341	-0.90295	-3.55013	5e-05	0.0012271	yes
ENSDARG00000101883	si:ch1073-398c20.3	4:74850467-74858921	wt	mut	OK	5.28815	3.10262	8.39077	-0.769275	-1.74242	0.0033	0.0357631	yes
ENSDARG00000101930	CU914622.2	12:43943008-43947249	wt	mut	OK	0.256015	1.68797	1.94399	2.72099	3.5201	0.00015	0.00315604	yes
ENSDARG00000101959	etv1	15:34315529-34356315	wt	mut	OK	0.498763	0.932693	1.43146	0.903048	2.0717	0.0005	0.00833478	yes
ENSDARG00000101960	si:dkeyp-44d3.3	4:40974760-40981460	wt	mut	OK	1.81381	3.07484	4.88865	0.761489	1.68758	0.0051	0.0489651	yes
ENSDARG00000070858	si:busm1-105l16.2	1:45782071-45903826	wt	mut	OK	12.4166	6.62411	19.0407	-0.90647	-2.31621	5e-05	0.0012271	yes
ENSDARG00000102000	wu:fj30f06	15:44471-48820	wt	mut	OK	1.80408	3.00517	4.80925	0.736187	1.8548	0.00175	0.0221517	yes
ENSDARG00000102572	si:ch211-260e23.9	7:45731082-45737495	wt	mut	OK	12.8131	6.77415	19.5873	-0.919506	-2.56788	5e-05	0.0012271	yes
ENSDARG00000075467	shisa3	14:46212991-46219704	wt	mut	OK	24.7396	13.0787	37.8183	-0.919604	-4.17746	5e-05	0.0012271	yes
ENSDARG00000100838	BX640584.3	4:50684377-50754643	wt	mut	OK	6.98839	3.69021	10.6786	-0.921257	-2.10238	0.00035	0.00635637	yes
ENSDARG00000102070	tbc1d10aa	8:40386579-40412444	wt	mut	OK	5.29943	3.76596	9.06539	-0.492818	-2.00289	0.00085	0.0128191	yes
ENSDARG00000051762	DNAJA4	25:33833849-33842488	wt	mut	OK	10.4449	5.50545	15.9504	-0.92387	-2.66755	5e-05	0.0012271	yes
ENSDARG00000102100	mrc1a	7:58589599-58650000	wt	mut	OK	1.63734	2.48791	4.12525	0.603586	1.90492	0.0015	0.0196952	yes
ENSDARG00000102112	BX677667.1	2:51639196-51643949	wt	mut	OK	0.799202	0.0652112	0.864413	-3.61537	-4.04852	5e-05	0.0012271	yes
ENSDARG00000102113	si:ch211-193l2.7	11:41449984-41453173	wt	mut	OK	6.91029	1.06985	7.98014	-2.69134	-3.86822	5e-05	0.0012271	yes
ENSDARG00000102146	si:ch211-69b7.6	11:11907958-11926604	wt	mut	OK	2.99129	2.21726	5.20855	-0.431987	-1.61594	0.0039	0.0405831	yes
ENSDARG00000102151	si:ch211-249o11.5	2:51233726-51240885	wt	mut	OK	1.60979	0	1.60979	#NAME?	#NAME?	5e-05	0.0012271	yes
ENSDARG00000089372	clk4a	14:6627173-6637805	wt	mut	OK	71.7532	37.7244	109.478	-0.927544	-4.21208	5e-05	0.0012271	yes
ENSDARG00000102178	emilin2b	7:71472578-71496057	wt	mut	OK	3.32126	1.82012	5.14138	-0.867696	-2.30359	5e-05	0.0012271	yes
ENSDARG00000090431	ftr04	2:58943779-59230184	wt	mut	OK	13.3881	7.02963	20.4177	-0.929431	-1.82599	0.00165	0.0211497	yes
ENSDARG00000102204	jph3	25:12543705-12599632	wt	mut	OK	0.934962	1.52823	2.46319	0.708884	1.75373	0.0037	0.0388297	yes
ENSDARG00000102226	gpr19	4:135879-141154	wt	mut	OK	2.07377	1.18893	3.2627	-0.802586	-1.82297	0.0018	0.0226351	yes
ENSDARG00000105208	TM6SF2 (1 of many)	2:57136652-57156096	wt	mut	OK	7.01895	3.68021	10.6992	-0.931469	-2.84513	5e-05	0.0012271	yes
ENSDARG00000102261	RSPH1	9:16827921-16845830	wt	mut	OK	2.86498	1.33049	4.19547	-1.10657	-1.94724	0.002	0.0245944	yes
ENSDARG00000102370	znf1094	4:40986636-40993450	wt	mut	OK	9.22645	4.79976	14.0262	-0.942812	-3.18771	5e-05	0.0012271	yes
ENSDARG00000097842	znf1134	3:61105600-61135046	wt	mut	OK	6.83882	3.54794	10.3868	-0.946768	-1.72159	0.0048	0.0469203	yes
ENSDARG00000045980	cst14b.1	5:4081427-4091680	wt	mut	OK	227.137	117.519	344.656	-0.950664	-4.42079	5e-05	0.0012271	yes
ENSDARG00000102371	CU570769.1	22:1235690-1243852	wt	mut	OK	1.893	5.17111	7.06411	1.4498	3.69886	5e-05	0.0012271	yes
ENSDARG00000102379	si:zfos-80g12.1	14:30579943-30605000	wt	mut	OK	4.23227	2.91485	7.14712	-0.538007	-1.74838	0.00225	0.0267534	yes
ENSDARG00000102429	FO704688.1	12:43752091-43756079	wt	mut	OK	1.47269	0.67166	2.14435	-1.13265	-2.64784	5e-05	0.0012271	yes
ENSDARG00000102435	plekhf1	7:45703170-45704590	wt	mut	OK	3.16592	1.65469	4.82061	-0.936068	-1.87937	0.0018	0.0226351	yes
ENSDARG00000102436	si:ch211-194b1.1	3:13487536-13534551	wt	mut	OK	1.38138	0.800388	2.18177	-0.787342	-2.345	5e-05	0.0012271	yes
ENSDARG00000089637	rnaseh2c	14:35069008-35074278	wt	mut	OK	16.6562	8.6018	25.258	-0.953346	-2.33787	5e-05	0.0012271	yes
ENSDARG00000102447	gdpd4a	18:3195884-3244649	wt	mut	OK	1.40266	0.654572	2.05723	-1.09954	-1.85461	0.00245	0.02858	yes
ENSDARG00000102472	btbd17b	3:12729767-12739422	wt	mut	OK	0.922801	4.15032	5.07312	2.16913	5.67937	5e-05	0.0012271	yes
ENSDARG00000058893	nhej1	6:6928719-6951894	wt	mut	OK	19.1008	9.85846	28.9593	-0.954198	-2.69756	5e-05	0.0012271	yes
ENSDARG00000102489	BX000534.1	12:16913901-16918271	wt	mut	OK	0.974752	0.160962	1.13571	-2.59832	-4.15399	5e-05	0.0012271	yes
ENSDARG00000098481	zgc:110283	5:64308736-64315588	wt	mut	OK	30.4803	15.6555	46.1358	-0.961208	-3.25161	5e-05	0.0012271	yes
ENSDARG00000102542	si:ch211-268b14.2	4:41292388-41311804	wt	mut	OK	2.58043	0.609812	3.19024	-2.08117	-4.7363	5e-05	0.0012271	yes
ENSDARG00000102549	CR450729.2	3:1785784-1850335	wt	mut	OK	4.88881	1.05687	5.94568	-2.20969	-6.97899	5e-05	0.0012271	yes
ENSDARG00000052010	fam96b	7:44626547-44631769	wt	mut	OK	27.3521	13.9481	41.3002	-0.97158	-2.73701	5e-05	0.0012271	yes
ENSDARG00000036844	tsen54	3:60299982-60334005	wt	mut	OK	9.132	4.64471	13.7767	-0.975344	-2.89248	5e-05	0.0012271	yes
ENSDARG00000073905	VWA5A (1 of many)	25:222264-238764	wt	mut	OK	29.293	14.8217	44.1147	-0.982844	-3.62713	5e-05	0.0012271	yes
ENSDARG00000102635	znf1037	4:51253170-51264627	wt	mut	OK	0.765729	2.10544	2.87117	1.45922	2.56896	0.00015	0.00315604	yes
ENSDARG00000102694	si:ch211-103a14.1	22:1233340-1234762	wt	mut	OK	1.7933	6.22176	8.01506	1.7947	2.11027	0.0026	0.0298455	yes
ENSDARG00000102703	si:dkey-202l22.5	15:12057645-12061486	wt	mut	OK	0.876847	2.37989	3.25674	1.4405	1.76584	0.00285	0.03195	yes
ENSDARG00000016649	akr7a3	11:41226228-41241747	wt	mut	OK	15.7208	7.92668	23.6475	-0.987883	-1.76051	0.0041	0.0418812	yes
ENSDARG00000102710	si:dkey-62k3.4	7:26341989-26344984	wt	mut	OK	0.831881	3.38264	4.21452	2.0237	2.73625	0.00045	0.00770223	yes
ENSDARG00000102722	itih3b	11:36910727-36932669	wt	mut	OK	1.05711	0.24948	1.30659	-2.08313	-2.96543	5e-05	0.0012271	yes
ENSDARG00000102742	bmpr1bb	10:1078505-1092551	wt	mut	OK	1.54493	3.18612	4.73105	1.04426	1.97543	0.0013	0.0177164	yes
ENSDARG00000100317	ahsa1b	17:43736750-43749935	wt	mut	OK	45.5618	22.6659	68.2277	-1.0073	-4.27863	5e-05	0.0012271	yes
ENSDARG00000017337	zgc:77929	11:11349030-11353365	wt	mut	OK	7.67628	3.80708	11.4834	-1.01172	-2.82573	5e-05	0.0012271	yes
ENSDARG00000102759	CT583723.1	8:35129730-35179756	wt	mut	OK	0.430475	0.915932	1.34641	1.08931	2.05019	0.00085	0.0128191	yes
ENSDARG00000059841	exosc1	1:54006002-54028388	wt	mut	OK	18.4902	9.16175	27.6519	-1.01307	-1.82307	0.00255	0.0294479	yes
ENSDARG00000077533	eif3f	1:9612915-9619933	wt	mut	OK	342.342	167.463	509.805	-1.0316	-4.91647	5e-05	0.0012271	yes
ENSDARG00000040534	epcam	13:8508748-8511340	wt	mut	OK	304.657	148.301	452.958	-1.03865	-4.83678	5e-05	0.0012271	yes
ENSDARG00000029766	nr1i2	9:9524489-9584607	wt	mut	OK	8.35429	4.0569	12.4112	-1.04214	-3.10702	5e-05	0.0012271	yes
ENSDARG00000087897	h2afy2	13:7420830-7435398	wt	mut	OK	179.956	86.6603	266.616	-1.0542	-4.81561	5e-05	0.0012271	yes
ENSDARG00000033285	gsto2	13:25266445-25272322	wt	mut	OK	19.6945	9.47193	29.1664	-1.05606	-3.3732	5e-05	0.0012271	yes
ENSDARG00000102899	cremb	24:31411383-31431309	wt	mut	OK	0.814741	0	0.814741	#NAME?	#NAME?	5e-05	0.0012271	yes
ENSDARG00000100774	cmc4	21:44562233-44562741	wt	mut	OK	15.5428	7.42639	22.9692	-1.06551	-2.08426	0.00145	0.0191553	yes
ENSDARG00000102948	crb3a	3:45375632-45403703	wt	mut	OK	2.14497	1.03446	3.17943	-1.05208	-2.64349	5e-05	0.0012271	yes
ENSDARG00000102961	CR391997.2	4:70344004-70349186	wt	mut	OK	4.09481	0.829897	4.92471	-2.30279	-3.09897	0.0002	0.00399838	yes
ENSDARG00000102986	csf1ra	14:3170815-3202049	wt	mut	OK	0.893214	0.375943	1.26916	-1.24849	-2.27741	0.00045	0.00770223	yes
ENSDARG00000029479	zgc:86609	8:8647544-8660022	wt	mut	OK	8.26323	3.93418	12.1974	-1.07064	-3.26421	5e-05	0.0012271	yes
ENSDARG00000054255	tctex1d2	22:35496903-35502902	wt	mut	OK	8.17049	3.87123	12.0417	-1.07763	-2.6138	0.0001	0.00224065	yes
ENSDARG00000103036	CABZ01032351.2	13:18976777-19029245	wt	mut	OK	3.61911	0	3.61911	#NAME?	#NAME?	5e-05	0.0012271	yes
ENSDARG00000103045	si:dkey-261o4.8	4:38989671-39007746	wt	mut	OK	0.282823	2.02228	2.3051	2.83801	2.16052	0.00375	0.0392828	yes
ENSDARG00000010250	nqo1	7:56401842-56420909	wt	mut	OK	20.7835	9.84546	30.629	-1.07791	-3.61789	5e-05	0.0012271	yes
ENSDARG00000040039	pttg1ipb	9:12684074-12687937	wt	mut	OK	24.2527	11.4509	35.7036	-1.08268	-3.74906	5e-05	0.0012271	yes
ENSDARG00000103106	trappc9	19:4526788-4531237	wt	mut	OK	1.22095	0.615288	1.83624	-0.988672	-2.0262	0.00125	0.0172117	yes
ENSDARG00000011701	ctsll	5:23802076-23805867	wt	mut	OK	10.3229	4.86776	15.1907	-1.08451	-3.09366	5e-05	0.0012271	yes
ENSDARG00000103148	pvrl4	2:57911534-57945244	wt	mut	OK	3.45404	5.30723	8.76127	0.619673	1.76382	0.00255	0.0294479	yes
ENSDARG00000078847	si:dkey-238o13.4	18:14703276-14709424	wt	mut	OK	18.5232	8.71743	27.2406	-1.08736	-3.59694	5e-05	0.0012271	yes
ENSDARG00000068265	tomm5	14:44312776-44329505	wt	mut	OK	218.63	102.582	321.212	-1.09171	-4.78722	5e-05	0.0012271	yes
ENSDARG00000005574	vsx2	17:31635676-31642707	wt	mut	OK	34.6263	16.1751	50.8014	-1.09809	-4.5556	5e-05	0.0012271	yes
ENSDARG00000103250	si:dkeyp-35e5.10	4:60913280-60920604	wt	mut	OK	3.58503	1.571	5.15603	-1.1903	-2.70186	5e-05	0.0012271	yes
ENSDARG00000103272	si:dkey-53k12.1	2:48782285-48791341	wt	mut	OK	0.927869	0	0.927869	#NAME?	#NAME?	5e-05	0.0012271	yes
ENSDARG00000103277	cyp24a1	6:55869048-55881711	wt	mut	OK	0.673183	1.36817	2.04135	1.02317	1.93382	0.00205	0.0250132	yes
ENSDARG00000076838	apom	2:42379322-42385143	wt	mut	OK	7.76638	3.6102	11.3766	-1.10516	-2.27779	5e-05	0.0012271	yes
ENSDARG00000103306	si:dkey-27n6.9	4:69663501-69666972	wt	mut	OK	1.50594	5.80058	7.30652	1.94553	3.73646	5e-05	0.0012271	yes
ENSDARG00000103307	znf1117	4:67836796-67844305	wt	mut	OK	1.77126	4.06207	5.83333	1.19744	2.65204	0.0001	0.00224065	yes
ENSDARG00000092493	si:dkeyp-44a8.2	14:6308836-6319647	wt	mut	OK	16.427	7.59013	24.0171	-1.11388	-4.5822	5e-05	0.0012271	yes
ENSDARG00000092483	iqcc	13:33167887-33171536	wt	mut	OK	12.7497	5.8415	18.5912	-1.12605	-3.17785	5e-05	0.0012271	yes
ENSDARG00000007024	uox	11:8143032-8158172	wt	mut	OK	34.4033	15.708	50.1113	-1.13105	-2.87876	5e-05	0.0012271	yes
ENSDARG00000087046	si:ch211-222k6.2	22:10024511-10026611	wt	mut	OK	7.00716	3.1719	10.1791	-1.14348	-2.48952	5e-05	0.0012271	yes
ENSDARG00000030440	rsrp1	13:45331481-45338401	wt	mut	OK	47.9475	21.1635	69.111	-1.17988	-4.07783	5e-05	0.0012271	yes
ENSDARG00000103441	znf1060	4:41536955-41549373	wt	mut	OK	1.90002	0.792148	2.69217	-1.26217	-2.43434	0.0002	0.00399838	yes
ENSDARG00000105374	si:ch73-368j24.6	7:6231011-6231530	wt	mut	OK	394.101	173.91	568.011	-1.18023	-4.89375	5e-05	0.0012271	yes
ENSDARG00000003132	apip	7:49628706-49635742	wt	mut	OK	100.179	43.9638	144.143	-1.18819	-4.93037	5e-05	0.0012271	yes
ENSDARG00000103484	si:ch211-215k15.5	16:42567696-42569229	wt	mut	OK	3.05175	6.11299	9.16474	1.00224	2.45419	5e-05	0.0012271	yes
ENSDARG00000099417	CT027611.1	8:30311391-30316584	wt	mut	OK	13.6767	6.00043	19.6771	-1.18859	-5.11248	5e-05	0.0012271	yes
ENSDARG00000103521	capsla	2:54218469-54224926	wt	mut	OK	0.907346	2.59057	3.49792	1.51354	2.13205	0.0005	0.00833478	yes
ENSDARG00000055046	ponzr5	7:22386408-22392814	wt	mut	OK	12.6672	5.54956	18.2168	-1.19065	-2.8041	5e-05	0.0012271	yes
ENSDARG00000103589	gata6	2:4366259-4376938	wt	mut	OK	4.26151	2.69431	6.95582	-0.66145	-1.76452	0.00275	0.031112	yes
ENSDARG00000103612	akt2l	10:311919-321118	wt	mut	OK	4.05124	2.4855	6.53674	-0.704829	-1.75014	0.0028	0.0315741	yes
ENSDARG00000103614	pemt	12:1287083-1360126	wt	mut	OK	3.56017	1.91107	5.47124	-0.897565	-2.41115	5e-05	0.0012271	yes
ENSDARG00000103618	btr18	19:3788105-3849697	wt	mut	OK	3.86068	5.81208	9.67276	0.590201	1.73454	0.0035	0.0373442	yes
ENSDARG00000103665	BRPF1	8:54034355-54053810	wt	mut	OK	2.98793	4.33078	7.31871	0.535481	1.82456	0.0016	0.0207088	yes
ENSDARG00000071576	si:dkey-102c8.3	22:10037163-10063025	wt	mut	OK	11.6715	5.10413	16.7756	-1.19325	-3.00393	5e-05	0.0012271	yes
ENSDARG00000103694	CR356223.4	4:46824745-46831211	wt	mut	OK	0.972568	3.44173	4.4143	1.82326	3.5268	5e-05	0.0012271	yes
ENSDARG00000103701	FO393424.1	22:8939729-8943408	wt	mut	OK	0.400511	2.93035	3.33086	2.87116	3.12036	0.0003	0.00565055	yes
ENSDARG00000103708	BX000703.1	4:35284157-35388384	wt	mut	OK	4.60412	1.89647	6.50059	-1.27961	-3.95777	5e-05	0.0012271	yes
ENSDARG00000103721	si:dkey-122c11.7	4:55313873-55350393	wt	mut	OK	0.85408	1.81398	2.66806	1.08672	1.75937	0.0041	0.0418812	yes
ENSDARG00000103725	znf341	23:43596815-43629932	wt	mut	OK	2.94769	1.8895	4.83719	-0.641579	-2.10231	0.00035	0.00635637	yes
ENSDARG00000104367	zgc:194469	6:12870807-12900471	wt	mut	OK	23.6662	10.3351	34.0013	-1.19527	-4.20231	5e-05	0.0012271	yes
ENSDARG00000004889	aga	14:36088126-36096935	wt	mut	OK	16.6456	7.26917	23.9148	-1.19528	-3.82878	5e-05	0.0012271	yes
ENSDARG00000097493	si:dkey-148h10.5	6:32059287-32072196	wt	mut	OK	13.7889	6.00287	19.7918	-1.19979	-3.17714	5e-05	0.0012271	yes
ENSDARG00000103755	si:dkeyp-4c4.1	4:39287489-39324901	wt	mut	OK	3.53983	2.07558	5.61541	-0.770165	-1.92945	0.00135	0.0182536	yes
ENSDARG00000059835	zfyve27	1:54212081-54230172	wt	mut	OK	18.8036	8.18561	26.9892	-1.19985	-3.33849	5e-05	0.0012271	yes
ENSDARG00000101973	CR769782.2	4:54449704-54628503	wt	mut	OK	9.59561	4.16259	13.7582	-1.20489	-4.14609	5e-05	0.0012271	yes
ENSDARG00000103779	si:dkey-3p4.8	4:37367829-37373423	wt	mut	OK	2.78927	0.843858	3.63313	-1.72481	-2.5278	0.0006	0.00968363	yes
ENSDARG00000036494	gstcd	1:49307880-49421777	wt	mut	OK	7.48205	3.23326	10.7153	-1.21044	-3.15304	5e-05	0.0012271	yes
ENSDARG00000103790	BX294653.1	4:46379890-46385716	wt	mut	OK	0.689266	4.40327	5.09254	2.67544	3.84065	5e-05	0.0012271	yes
ENSDARG00000103796	BX088712.2	4:65385842-65395487	wt	mut	OK	2.84709	0.295959	3.14305	-3.26602	-4.2313	5e-05	0.0012271	yes
ENSDARG00000027826	pudp	1:31608915-31653097	wt	mut	OK	9.92782	4.2677	14.1955	-1.21802	-2.72976	5e-05	0.0012271	yes
ENSDARG00000024746	hsp90aa1.2	20:54177900-54222597	wt	mut	OK	32.0769	13.7888	45.8657	-1.21804	-5.10057	5e-05	0.0012271	yes
ENSDARG00000103832	CU457778.4	4:69945187-69952235	wt	mut	OK	0.377007	3.22491	3.60192	3.0966	3.70119	0.00015	0.00315604	yes
ENSDARG00000045095	elac1	5:6291777-6301560	wt	mut	OK	8.19626	3.51894	11.7152	-1.21982	-2.81471	5e-05	0.0012271	yes
ENSDARG00000063126	gusb	5:1800936-1846705	wt	mut	OK	15.6819	6.69868	22.3806	-1.22715	-5.36048	5e-05	0.0012271	yes
ENSDARG00000103849	mdh1ab	17:24312559-24426001	wt	mut	OK	6.35144	1.1705	7.52194	-2.43996	-4.36587	5e-05	0.0012271	yes
ENSDARG00000103850	si:cabz01021426.2	4:71652628-71770329	wt	mut	OK	2.75557	4.89747	7.65304	0.829682	1.788	0.00455	0.0452196	yes
ENSDARG00000103858	arf4a	11:42183925-42202895	wt	mut	OK	1.1687	2.56655	3.73525	1.13492	2.0851	0.001	0.0144983	yes
ENSDARG00000103878	anpepb	25:10714754-10730975	wt	mut	OK	0.563273	1.97346	2.53673	1.80882	3.85635	5e-05	0.0012271	yes
ENSDARG00000103943	CR450842.2	3:1940698-1945953	wt	mut	OK	1.70949	6.53701	8.2465	1.93507	6.70497	5e-05	0.0012271	yes
ENSDARG00000103947	znf1028	3:61168722-61296766	wt	mut	OK	5.58935	0.532702	6.12205	-3.39128	-3.49484	0.00235	0.0276566	yes
ENSDARG00000103952	CABZ01054392.2	4:71005047-71024108	wt	mut	OK	0.902683	0.472887	1.37557	-0.932722	-1.69604	0.00485	0.0472485	yes
ENSDARG00000042881	nthl1	1:53465894-53478130	wt	mut	OK	8.6508	3.69144	12.3422	-1.22865	-3.50818	5e-05	0.0012271	yes
ENSDARG00000104026	si:dkeyp-35e5.5	4:60849424-60869960	wt	mut	OK	0.453778	2.37866	2.83244	2.39009	4.25134	5e-05	0.0012271	yes
ENSDARG00000103841	CU024870.1	25:23392430-23397900	wt	mut	OK	11.7882	4.93979	16.728	-1.25483	-5.29405	5e-05	0.0012271	yes
ENSDARG00000104052	si:dkey-270b7.5	4:52811012-52820622	wt	mut	OK	2.54469	0.880651	3.42534	-1.53085	-2.13188	0.0014	0.0186807	yes
ENSDARG00000104064	si:rp71-5o12.3	4:31281913-31524416	wt	mut	OK	1.50679	4.97374	6.48053	1.72286	2.91757	5e-05	0.0012271	yes
ENSDARG00000104067	CR626904.1	8:28715313-28863567	wt	mut	OK	1.00702	0.369691	1.37671	-1.44569	-2.34387	0.0005	0.00833478	yes
ENSDARG00000009196	anxa3a	5:38487210-38495470	wt	mut	OK	11.458	4.78367	16.2417	-1.26017	-3.52852	5e-05	0.0012271	yes
ENSDARG00000071345	mgst2	14:47229410-47232807	wt	mut	OK	39.1203	16.3097	55.43	-1.26219	-4.57443	5e-05	0.0012271	yes
ENSDARG00000104077	fcer1gl	2:57505216-57512999	wt	mut	OK	3.45686	1.4535	4.91036	-1.24994	-1.80831	0.0043	0.0433594	yes
ENSDARG00000046081	bloc1s2	20:7596471-7605367	wt	mut	OK	10.5472	4.39609	14.9433	-1.26256	-3.11521	5e-05	0.0012271	yes
ENSDARG00000104125	ttc6	17:10102341-10153732	wt	mut	OK	1.84502	0.895838	2.74086	-1.04233	-1.89582	0.00185	0.0231458	yes
ENSDARG00000101720	HIST3H3	7:5843963-5844461	wt	mut	OK	1662.74	688.798	2351.54	-1.27141	-6.06851	5e-05	0.0012271	yes
ENSDARG00000104160	CR628395.2	4:49753454-49757633	wt	mut	OK	2.74027	1.33374	4.07401	-1.03884	-2.54786	5e-05	0.0012271	yes
ENSDARG00000104163	si:cabz01071912.2	4:72589482-72603843	wt	mut	OK	2.95711	1.4883	4.44541	-0.990527	-2.15941	0.0004	0.00703486	yes
ENSDARG00000104174	CABZ01055168.1	3:6635142-6638627	wt	mut	OK	0.336549	0.850926	1.18748	1.33822	2.34884	0.0005	0.00833478	yes
ENSDARG00000104210	EFEMP1 (1 of many)	22:35092296-35108032	wt	mut	OK	3.55076	1.98975	5.54051	-0.835541	-1.77554	0.0019	0.0236342	yes
ENSDARG00000045364	trappc3	19:36135781-36146281	wt	mut	OK	22.0333	9.06882	31.1021	-1.2807	-4.35827	5e-05	0.0012271	yes
ENSDARG00000098535	si:dkey-13a3.5	14:47469009-47629494	wt	mut	OK	10.1733	4.1869	14.3602	-1.28083	-2.45724	0.0002	0.00399838	yes
ENSDARG00000104280	bnip1b	21:41139306-41148364	wt	mut	OK	2.41947	0.828238	3.24771	-1.54657	-3.78291	5e-05	0.0012271	yes
ENSDARG00000052468	GSK3B (1 of many)	1:48726128-48765129	wt	mut	OK	15.0114	5.96657	20.978	-1.33109	-2.31853	0.0004	0.00703486	yes
ENSDARG00000057113	c6	21:20706239-20896022	wt	mut	OK	7.56795	2.99033	10.5583	-1.3396	-1.84814	0.00055	0.00903729	yes
ENSDARG00000095584	si:ch211-218c6.9	18:16989561-16994000	wt	mut	OK	16.2864	6.43175	22.7182	-1.34038	-3.27115	5e-05	0.0012271	yes
ENSDARG00000103310	znf1053	4:51229597-51238471	wt	mut	OK	10.0452	3.91638	13.9616	-1.35892	-3.93229	5e-05	0.0012271	yes
ENSDARG00000104386	si:ch73-356i23.1	7:8286368-8293783	wt	mut	OK	1.40319	0	1.40319	#NAME?	#NAME?	0.0003	0.00565055	yes
ENSDARG00000105508	si:dkey-23a13.21	7:5854965-5855595	wt	mut	OK	591.665	230.312	821.977	-1.36119	-5.98511	5e-05	0.0012271	yes
ENSDARG00000104407	BX649453.3	4:36164174-36202976	wt	mut	OK	5.53882	2.3644	7.90322	-1.22811	-2.94953	5e-05	0.0012271	yes
ENSDARG00000104428	si:ch211-190o19.1	3:11430725-11434757	wt	mut	OK	2.99218	0.31782	3.31	-3.23491	-5.12638	5e-05	0.0012271	yes
ENSDARG00000043126	blf	22:9887324-9894010	wt	mut	OK	13.6462	5.29777	18.944	-1.36504	-4.34421	5e-05	0.0012271	yes
ENSDARG00000105397	si:dkey-23a13.8	7:5788819-5789342	wt	mut	OK	210.891	81.3364	292.227	-1.37453	-5.6992	5e-05	0.0012271	yes
ENSDARG00000104504	CU457794.1	4:59666404-59668238	wt	mut	OK	3.71684	1.45557	5.17241	-1.3525	-2.61066	5e-05	0.0012271	yes
ENSDARG00000104549	arhgap44	12:48497268-48550367	wt	mut	OK	1.8884	1.05267	2.94107	-0.843113	-1.76536	0.0029	0.0323424	yes
ENSDARG00000104561	znf1081	4:67756435-67761721	wt	mut	OK	2.19127	3.66652	5.85779	0.742646	1.77051	0.00295	0.0327308	yes
ENSDARG00000059816	zgc:136864	1:54324931-54331231	wt	mut	OK	36.2523	13.7847	50.037	-1.39501	-3.65424	5e-05	0.0012271	yes
ENSDARG00000104638	BX324155.1	4:46447571-46456087	wt	mut	OK	0.607167	2.1413	2.74847	1.81832	3.70345	5e-05	0.0012271	yes
ENSDARG00000104640	BX511034.6	22:7598786-7616295	wt	mut	OK	1.09888	2.00926	3.10814	0.870636	2.06329	0.0008	0.012247	yes
ENSDARG00000104666	BX511215.2	4:65419236-65568397	wt	mut	OK	3.75834	5.43637	9.19471	0.532549	2.04934	0.00035	0.00635637	yes
ENSDARG00000016056	mhc1laa	8:44448313-44454517	wt	mut	OK	9.31484	3.5296	12.8444	-1.40003	-4.2067	5e-05	0.0012271	yes
ENSDARG00000058365	hspb8	5:15319430-15340268	wt	mut	OK	11.9838	4.45649	16.4403	-1.4271	-3.7157	5e-05	0.0012271	yes
ENSDARG00000104719	abcc1	3:36571623-36602104	wt	mut	OK	3.47504	5.28524	8.76028	0.604939	1.65716	0.00155	0.0201828	yes
ENSDARG00000104822	znf1131	4:61330858-61335738	wt	mut	OK	3.02723	0.845316	3.87255	-1.84044	-3.5702	5e-05	0.0012271	yes
ENSDARG00000093926	si:dkey-71b5.2	16:22218280-22293132	wt	mut	OK	8.04717	2.89591	10.9431	-1.47447	-2.174	0.00115	0.0161047	yes
ENSDARG00000104855	CU464128.1	19:15381837-15386187	wt	mut	OK	1.3186	0.346769	1.66537	-1.92696	-3.92997	5e-05	0.0012271	yes
ENSDARG00000105328	si:dkey-23a13.17	7:5842648-5843368	wt	mut	OK	252.709	90.9171	343.626	-1.47485	-6.65145	5e-05	0.0012271	yes
ENSDARG00000104888	si:dkey-28i19.1	4:56775130-56779954	wt	mut	OK	0.276004	2.87166	3.14766	3.37912	3.58446	0.0007	0.0109792	yes
ENSDARG00000077339	ptrh2	10:28420123-28422692	wt	mut	OK	35.0694	12.5821	47.6515	-1.47884	-5.24796	5e-05	0.0012271	yes
ENSDARG00000104918	si:ch211-196f19.1	4:46184134-46198286	wt	mut	OK	0.542337	1.13975	1.68209	1.07145	2.16403	0.0004	0.00703486	yes
ENSDARG00000104919	si:ch211-153b23.3	14:11124781-11132075	wt	mut	OK	0.572059	1.60235	2.17441	1.48596	3.10325	5e-05	0.0012271	yes
ENSDARG00000104929	si:ch211-153f2.7	19:46380071-46390112	wt	mut	OK	0.307008	1.0602	1.36721	1.78799	3.07743	5e-05	0.0012271	yes
ENSDARG00000100456	ptk2aa	19:1844787-1898625	wt	mut	OK	80.8647	28.8699	109.735	-1.48594	-2.06574	0.0012	0.0166562	yes
ENSDARG00000038585	eif4e2	2:45263737-45282612	wt	mut	OK	8.87988	3.16265	12.0425	-1.4894	-4.30817	5e-05	0.0012271	yes
ENSDARG00000100531	abhd14b	6:53428848-53435332	wt	mut	OK	7.88135	2.80377	10.6851	-1.49107	-4.52701	5e-05	0.0012271	yes
ENSDARG00000105366	si:ch1073-159d7.10	7:6305342-6306048	wt	mut	OK	211.728	75.1687	286.897	-1.49401	-6.55503	5e-05	0.0012271	yes
ENSDARG00000005772	tsr2	8:8302492-8311092	wt	mut	OK	61.1876	21.6907	82.8783	-1.49617	-6.09921	5e-05	0.0012271	yes
ENSDARG00000104968	si:ch211-227e10.1	4:52708984-52727413	wt	mut	OK	1.53453	2.68421	4.21874	0.8067	2.03789	0.0003	0.00565055	yes
ENSDARG00000104979	si:dkey-56d12.4	5:50796415-50935380	wt	mut	OK	0.471007	1.97764	2.44865	2.06996	2.15983	0.00235	0.0276566	yes
ENSDARG00000105017	CT737138.1	4:34082398-34091459	wt	mut	OK	1.16675	4.45518	5.62193	1.93298	5.10649	5e-05	0.0012271	yes
ENSDARG00000105040	fam69c	24:2893711-2918796	wt	mut	OK	2.09483	3.24325	5.33808	0.630606	1.82899	0.0016	0.0207088	yes
ENSDARG00000097001	si:ch73-233c7.1	16:23101998-23104530	wt	mut	OK	10.3642	3.58231	13.9465	-1.53265	-3.57306	5e-05	0.0012271	yes
ENSDARG00000105106	CR749167.1	4:39369244-39378818	wt	mut	OK	3.56054	1.15027	4.71081	-1.63012	-2.5081	0.0001	0.00224065	yes
ENSDARG00000105144	znf979	4:39457252-39480384	wt	mut	OK	2.97342	0.837863	3.81128	-1.82734	-3.59915	5e-05	0.0012271	yes
ENSDARG00000043781	PSMB10	4:75630954-75641899	wt	mut	OK	11.531	3.94921	15.4802	-1.54589	-4.08536	5e-05	0.0012271	yes
ENSDARG00000105219	znf988	4:63148767-63209802	wt	mut	OK	2.17266	0.283681	2.45634	-2.93712	-2.36539	0.00365	0.0384219	yes
ENSDARG00000027529	hmox1a	3:25880610-25886721	wt	mut	OK	8.01064	2.72329	10.7339	-1.55657	-3.95357	5e-05	0.0012271	yes
ENSDARG00000100434	znf1091	4:62012128-62300828	wt	mut	OK	7.94628	2.664	10.6103	-1.57669	-2.67821	5e-05	0.0012271	yes
ENSDARG00000096100	si:dkey-254e13.13	4:59048769-59056394	wt	mut	OK	21.8812	7.23209	29.1133	-1.59721	-4.31585	5e-05	0.0012271	yes
ENSDARG00000069379	zgc:158868	18:22120312-22127312	wt	mut	OK	12.8095	4.03271	16.8422	-1.6674	-4.28559	5e-05	0.0012271	yes
ENSDARG00000098087	si:dkey-30f3.2	4:62012128-62300828	wt	mut	OK	11.2573	3.47247	14.7298	-1.69683	-2.86618	5e-05	0.0012271	yes
ENSDARG00000099091	si:ch73-158n7.2	5:57746326-57751492	wt	mut	OK	19.0443	5.44928	24.4936	-1.80522	-4.84046	5e-05	0.0012271	yes
ENSDARG00000105344	pkd1l2a	7:64953103-64967909	wt	mut	OK	0.312881	1.15561	1.46849	1.88497	3.73749	5e-05	0.0012271	yes
ENSDARG00000103474	SCARNA6	15:45576284-45622078	wt	mut	OK	1928.7	543.322	2472.02	-1.82774	-3.69231	5e-05	0.0012271	yes
ENSDARG00000096527	si:dkey-18j14.5	1:30050037-30055593	wt	mut	OK	18.1455	4.90642	23.0519	-1.88687	-7.58752	5e-05	0.0012271	yes
ENSDARG00000020711	rrm2	20:29589589-29596547	wt	mut	OK	59.187	15.7631	74.9501	-1.90873	-6.1304	5e-05	0.0012271	yes
ENSDARG00000102806	si:dkey-23a13.16	7:5838843-5839856	wt	mut	OK	263.982	68.9463	332.928	-1.9369	-8.90362	5e-05	0.0012271	yes
ENSDARG00000020866	apoa4b.2	16:23999037-24033538	wt	mut	OK	31.6488	7.80693	39.4557	-2.01933	-3.48763	5e-05	0.0012271	yes
ENSDARG00000101249	HIST2H4A	7:5837555-5838171	wt	mut	OK	1175.49	287.069	1462.56	-2.03379	-9.52337	5e-05	0.0012271	yes
ENSDARG00000100259	zgc:171759	7:5833512-5834381	wt	mut	OK	39.0269	9.37992	48.4068	-2.05682	-6.51093	5e-05	0.0012271	yes
ENSDARG00000099920	si:dkey-23a13.19	7:5846577-5847344	wt	mut	OK	46.4735	9.79724	56.2707	-2.24596	-6.74323	5e-05	0.0012271	yes
ENSDARG00000098058	im:7150988	14:3260217-3264807	wt	mut	OK	74.8686	14.443	89.3116	-2.37399	-7.5739	5e-05	0.0012271	yes
ENSDARG00000105389	mmel1	11:40266602-40341723	wt	mut	OK	0.869079	1.49241	2.36149	0.780085	1.4412	0.00395	0.0408569	yes
ENSDARG00000100731	slc27a2b	25:31861928-31881536	wt	mut	OK	9.96227	4.46164	14.4239	-2.40686	-4.13871	5e-05	0.0012271	yes
ENSDARG00000036895	dap1b	9:52812378-52951072	wt	mut	OK	48.4366	8.52479	56.9614	-2.50636	-4.15359	5e-05	0.0012271	yes
ENSDARG00000098881	si:dkey-238i5.3	11:30791617-30939791	wt	mut	OK	12.1036	1.92397	14.0276	-2.65327	-4.02928	5e-05	0.0012271	yes
ENSDARG00000099123	si:dkey-23a13.14	7:5835289-5835950	wt	mut	OK	397.326	59.0928	456.419	-2.74927	-11.7108	5e-05	0.0012271	yes
ENSDARG00000105411	si:ch211-113d11.5	14:47233711-47313867	wt	mut	OK	1.97043	0.470013	2.44044	-2.06774	-2.89606	0.0001	0.00224065	yes
ENSDARG00000105418	si:ch73-368j24.7	7:6279683-6280174	wt	mut	OK	85.6589	10.9264	96.5853	-2.97078	-8.05372	5e-05	0.0012271	yes
ENSDARG00000105424	si:rp71-46j2.7	14:32526433-32535966	wt	mut	OK	1.12097	2.97403	4.095	1.40767	3.61851	5e-05	0.0012271	yes
ENSDARG00000044488	pak1ip1	24:36270672-36287293	wt	mut	OK	57.8949	5.94106	63.836	-3.28464	-11.0062	5e-05	0.0012271	yes
ENSDARG00000105439	si:dkey-23a13.3	7:5907436-5914756	wt	mut	OK	0.284978	1.39392	1.6789	2.29023	3.73329	5e-05	0.0012271	yes
ENSDARG00000058873	ptpdc1b	23:4434434-4470767	wt	mut	OK	10.6141	0.773548	11.3876	-3.77835	-5.9142	5e-05	0.0012271	yes
ENSDARG00000096832	si:dkey-183k8.1	6:49312254-49323860	wt	mut	OK	9.58357	0.625615	10.2092	-3.93722	-4.54665	5e-05	0.0012271	yes
ENSDARG00000006588	zgc:111983	1:44472117-44476098	wt	mut	OK	15.8246	1.0006	16.8252	-3.98324	-5.57745	5e-05	0.0012271	yes
ENSDARG00000105511	si:ch211-243c14.5	11:36722152-36768292	wt	mut	OK	0.338512	3.80301	4.14152	3.48987	3.53818	5e-05	0.0012271	yes
ENSDARG00000105561	si:dkey-61m24.1	7:27982450-27987433	wt	mut	OK	6.60169	2.74589	9.34758	-1.26556	-2.55989	5e-05	0.0012271	yes
ENSDARG00000105592	erv	19:8047190-8049742	wt	mut	OK	0.643524	1.21455	1.85807	0.916352	1.78154	0.00355	0.0377376	yes
ENSDARG00000036700	si:ch211-114n24.6	6:6832284-6835877	wt	mut	OK	27.1549	0.670854	27.8258	-5.33907	-10.0518	5e-05	0.0012271	yes
ENSDARG00000102019	si:rp71-1h20.3	21:2077004-2124466	wt	mut	OK	282.25	5.15387	287.404	-5.77517	-15.1916	5e-05	0.0012271	yes
ENSDARG00000105737	si:cabz01069015.1	4:72347889-72372221	wt	mut	OK	3.51742	0.631461	4.14888	-2.47775	-3.69821	5e-05	0.0012271	yes

## Sheet: gene_UPpeak
gene	gene_id	locus	sample_1	sample_2	status	value_1	value_2	log2.fold_change	test_stat	p_value	q_value	associated_peak
zgc:158463	ENSDARG00000089382	5:825788-827000	wt	mut	OK	24.4852	116.363	2.24865	7.90052	5e-05	0.0012271	peak198204 (+135179)
col12a1a	ENSDARG00000078322	17:49685589-49879081	wt	mut	OK	5.16514	18.6766	1.85435	3.01737	5e-05	0.0012271	peak91059 (-108680), peak91058 (-105894)
mchr1b	ENSDARG00000022525	3:25377689-25378754	wt	mut	OK	7.68182	21.0194	1.4522	4.44451	5e-05	0.0012271	peak181773 (+600)
fancl	ENSDARG00000007885	13:26573446-26668794	wt	mut	OK	4.24263	10.1935	1.26462	2.21129	0.00025	0.0048518	peak44671 (+33), peak44682 (+87547)
si:dkey-256i11.2	ENSDARG00000093713	4:44506971-45111228	wt	mut	OK	3.41146	7.65967	1.16689	1.77327	0.0047	0.0463102	peak196613 (-44969), peak196616 (-24586), peak196618 (-480)
zgc:112148	ENSDARG00000001804	3:56793585-56803804	wt	mut	OK	5.43241	11.8933	1.13049	2.84721	5e-05	0.0012271	peak188156 (+366143)
si:ch211-9d9.1	ENSDARG00000099839	2:52144334-52164348	wt	mut	OK	6.61988	13.7422	1.05374	2.57801	5e-05	0.0012271	peak123164 (+14)
tinagl1	ENSDARG00000061231	19:42183995-42244582	wt	mut	OK	7.81385	14.9912	0.940011	3.35578	5e-05	0.0012271	peak111437 (+1369)
b3gnt5b	ENSDARG00000004396	2:7951388-7959268	wt	mut	OK	14.4997	25.341	0.805451	3.26433	5e-05	0.0012271	peak114490 (+29816)
pawr	ENSDARG00000045486	4:21602007-21745618	wt	mut	OK	7.69197	13.0169	0.758958	2.78257	5e-05	0.0012271	peak194926 (-48472), peak194878 (+156284)
nfil3-5	ENSDARG00000094965	6:7742071-7963434	wt	mut	OK	7.37767	12.4654	0.756697	2.27594	0.0003	0.00565055	peak214113 (+20355)
vegfaa	ENSDARG00000103542	16:4458252-4488590	wt	mut	OK	7.78037	12.9057	0.730096	2.64462	5e-05	0.0012271	peak70910 (-107667), peak70923 (-32490)
ebf1a	ENSDARG00000099849	14:34673341-34910320	wt	mut	OK	9.59424	15.8752	0.726538	2.13865	0.0002	0.00399838	peak56976 (+109418), peak57016 (+233656)
sema3bl	ENSDARG00000007560	8:26502873-26554824	wt	mut	OK	7.0314	11.5748	0.719108	2.79836	5e-05	0.0012271	peak245301 (-50836)
egfl6	ENSDARG00000045958	9:54688228-54723923	wt	mut	OK	4.90367	7.99249	0.704785	2.13928	0.0005	0.00833478	peak261642 (-12233), peak261644 (-7464), peak261650 (+7005)
eomesa	ENSDARG00000006640	19:861016-875079	wt	mut	OK	4.08812	6.62659	0.696828	2.295	0.0001	0.00224065	peak102792 (-31683)
cahz	ENSDARG00000011166	2:29493849-29501875	wt	mut	OK	6.26143	9.94362	0.667278	2.23759	0.00015	0.00315604	peak118319 (+95249)
sncb	ENSDARG00000104945	14:45619120-45653489	wt	mut	OK	4.10529	6.46542	0.655257	1.77909	0.00285	0.03195	peak59267 (+174952)
b3gntl1	ENSDARG00000043431	1:56632800-56649965	wt	mut	OK	5.35605	8.42731	0.653902	1.91862	0.00095	0.0139255	peak10882 (-1487)
dgcr2	ENSDARG00000042962	10:42111604-42279757	wt	mut	OK	14.915	22.9226	0.620006	2.08276	0.00045	0.00770223	peak19461 (-20931)
epb41l3b	ENSDARG00000019917	2:58027561-58111786	wt	mut	OK	7.03624	10.5565	0.585257	1.82442	0.00175	0.0221517	peak124245 (-146995)
cdh7	ENSDARG00000023542	2:27354780-27439019	wt	mut	OK	14.4979	21.4461	0.564873	1.97859	0.00095	0.0139255	peak117858 (-232023)
plekho1b	ENSDARG00000077499	16:38065317-38117920	wt	mut	OK	5.65965	8.27487	0.548023	2.32617	5e-05	0.0012271	peak77926 (-33331)
tgfb3	ENSDARG00000019367	17:51987800-52020693	wt	mut	OK	7.61371	11.0663	0.539497	1.73039	0.0025	0.0290455	peak91500 (-206884)
fam188a	ENSDARG00000028715	16:28335413-28436707	wt	mut	OK	10.241	14.3911	0.490812	2.01118	0.00075	0.0116365	peak75673 (-282279)
slc35b1	ENSDARG00000038213	3:20813421-20832966	wt	mut	OK	20.5028	28.7621	0.488349	2.10903	0.00035	0.00635637	peak180644 (+33971), peak180638 (+67085)
slc35b1	ENSDARG00000038213	3:20813421-20832966	wt	mut	OK	20.5028	28.7621	0.488349	2.10903	0.00035	0.00635637	peak180644 (-130514), peak180638 (-97400)
glo1	ENSDARG00000068978	13:44651172-44671879	wt	mut	OK	11.6129	16.2842	0.487746	1.78737	0.0018	0.0226351	peak48680 (-18925)
lhx2b	ENSDARG00000031222	8:3026370-3042643	wt	mut	OK	18.1979	25.3059	0.475704	2.0005	0.00055	0.00903729	peak240234 (-154124), peak240236 (-137827), peak240293 (+55343)
fgd4a	ENSDARG00000101471	18:12168573-12260806	wt	mut	OK	6.08585	8.43528	0.470977	1.70583	0.00275	0.031112	peak94383 (-61207), peak94384 (-59558), peak94387 (-49289)
sox21b	ENSDARG00000008540	9:53736848-53738215	wt	mut	OK	20.0179	27.709	0.469061	1.87545	0.0007	0.0109792	peak261381 (-311816), peak261417 (-170553), peak261467 (+4855)
insm1a	ENSDARG00000091756	20:48675358-48677782	wt	mut	OK	11.5149	15.9187	0.467211	1.86038	0.00115	0.0161047	peak134273 (-160638), peak134288 (-116472), peak134293 (-95529)
cdh5	ENSDARG00000075549	7:44106369-44250008	wt	mut	OK	5.51797	7.59786	0.461455	1.66123	0.004	0.0411766	peak233685 (-35225)
tnc	ENSDARG00000021948	5:27960852-28025364	wt	mut	OK	34.1238	46.9858	0.461448	1.7477	0.0004	0.00703486	peak203535 (+35028)
cx43	ENSDARG00000041799	20:40818052-40823420	wt	mut	OK	12.3208	16.827	0.449679	1.86872	0.0013	0.0177164	peak132767 (+94433)
tubb4b	ENSDARG00000002344	14:5554600-5558312	wt	mut	OK	581.679	793.777	0.44851	2.0972	0.0001	0.00224065	peak186988 (-740428)
tubb4b	ENSDARG00000002344	14:5554600-5558312	wt	mut	OK	581.679	793.777	0.44851	2.0972	0.0001	0.00224065	peak249790 (+27115), peak249784 (+51636)
pfdn2	ENSDARG00000025391	7:7244028-7260389	wt	mut	OK	52.9862	72.2604	0.447588	2.09376	0.0003	0.00565055	peak225107 (+52190)
igfbp5b	ENSDARG00000025348	9:47020156-47041700	wt	mut	OK	7.03977	9.54834	0.439721	1.89551	0.00105	0.0150587	peak260488 (-926500), peak260239 (+33851)
auh	ENSDARG00000042975	10:5422270-5475386	wt	mut	OK	17.183	23.2349	0.435314	1.74702	0.00255	0.0294479	peak12449 (+95583)
cdh11	ENSDARG00000021442	7:43420923-43501455	wt	mut	OK	13.8708	18.4614	0.412467	1.85213	0.00165	0.0211497	peak233685 (-637490)
pbx2	ENSDARG00000019717	16:48674201-48701154	wt	mut	OK	41.6809	54.8989	0.397391	1.68038	0.00225	0.0267534	peak80055 (-27750)
prickle1b	ENSDARG00000045694	4:13964649-13996917	wt	mut	OK	17.0336	22.3965	0.394886	1.73727	0.00275	0.031112	peak192914 (-189495), peak192913 (-185013)
reep2	ENSDARG00000031382	14:21299470-21320760	wt	mut	OK	11.6609	15.2483	0.386973	1.63629	0.0047	0.0463102	peak53762 (+251021)
mrpl38	ENSDARG00000039667	12:44867468-44886420	wt	mut	OK	36.5024	47.5561	0.381641	1.6461	0.0042	0.042525	peak38410 (+305980)
ctdspl2b	ENSDARG00000060586	7:31103232-31122429	wt	mut	OK	23.7265	30.723	0.372821	1.7532	0.0025	0.0290455	peak230296 (-70871)
nap1l1	ENSDARG00000101813	4:1469443-1496899	wt	mut	OK	94.624	74.1174	-0.352393	-1.70822	0.00295	0.0327308	peak189791 (-93357)
mt-nd2	ENSDARG00000063899	MT:4992-6107	wt	mut	OK	65.7038	50.9099	-0.368032	-1.60062	0.00395	0.0408569	peak262069 (-3779), peak262070 (-2521), peak262071 (-2307), peak262072 (-2110), peak262073 (-1874)
prkacbb	ENSDARG00000059125	2:2482328-2509720	wt	mut	OK	8.82173	6.78163	-0.37943	-1.59024	0.00515	0.0492806	peak113547 (-74934)
ppiaa	ENSDARG00000009212	8:45746991-45752208	wt	mut	OK	1787.94	1370.14	-0.383977	-1.60587	0.0045	0.0448001	peak248524 (-55611)
armc1	ENSDARG00000013861	24:24556605-24579110	wt	mut	OK	22.3546	16.8205	-0.410347	-1.68942	0.00315	0.034375	peak166858 (+93917)
xrcc5	ENSDARG00000099298	9:53018678-53058160	wt	mut	OK	56.6795	41.4711	-0.45072	-2.05225	0.0003	0.00565055	peak261331 (-140393)
xrcc5	ENSDARG00000099298	9:53018678-53058160	wt	mut	OK	56.6795	41.4711	-0.45072	-2.05225	0.0003	0.00565055	peak261146 (-821825)
mt-nd1	ENSDARG00000063895	MT:3802-4777	wt	mut	OK	382.742	273.961	-0.482401	-2.33242	5e-05	0.0012271	peak262069 (-2589), peak262070 (-1331), peak262071 (-1117), peak262072 (-920), peak262073 (-684)
vps39	ENSDARG00000074471	17:49995400-50034417	wt	mut	OK	9.76976	6.99063	-0.482901	-1.73112	0.0023	0.0272167	peak91098 (+100450)
diaph3	ENSDARG00000090785	11:31417516-31802038	wt	mut	OK	18.3101	12.9676	-0.497728	-1.70607	0.0024	0.0281108	peak26856 (-145156), peak26744 (-36222), peak26794 (+167326)
diaph3	ENSDARG00000090785	11:31417516-31802038	wt	mut	OK	18.3101	12.9676	-0.497728	-1.70607	0.0024	0.0281108	peak26794 (-84377), peak26893 (+230856)
atxn2l	ENSDARG00000011597	3:15244627-15275891	wt	mut	OK	6.75148	4.61287	-0.549541	-2.04829	0.00055	0.00903729	peak179429 (+45024)
rx2	ENSDARG00000040321	2:55709126-55737506	wt	mut	OK	20.7108	14.1338	-0.551234	-2.12721	0.00045	0.00770223	peak123770 (-138)
hebp2	ENSDARG00000042630	20:30991213-30998155	wt	mut	OK	13.3485	9.08366	-0.555329	-1.93229	0.00055	0.00903729	peak130651 (+61938)
cdk4	ENSDARG00000087937	11:170967-197220	wt	mut	OK	11.3336	7.70347	-0.557024	-1.71154	0.00285	0.03195	peak20298 (-11107), peak20295 (+7033)
sepw2a	ENSDARG00000038228	3:19958478-19968602	wt	mut	OK	116.849	79.2988	-0.559272	-2.70339	5e-05	0.0012271	peak180556 (-341357)
si:ch211-74m13.3	ENSDARG00000076144	3:54489466-54519018	wt	mut	OK	9.4493	6.33849	-0.576067	-1.82923	0.0024	0.0281108	peak187598 (-46575)
ptpn11a	ENSDARG00000020334	10:3427889-3452371	wt	mut	OK	21.6635	14.3532	-0.593896	-2.68088	5e-05	0.0012271	peak12006 (+52983)
myh9b	ENSDARG00000001014	3:5177801-5318329	wt	mut	OK	16.7591	11.0656	-0.598865	-2.68503	5e-05	0.0012271	peak177804 (+3)
nek2	ENSDARG00000005619	20:13987150-13997930	wt	mut	OK	11.6849	7.60066	-0.620442	-2.20386	0.0001	0.00224065	peak126813 (-97088), peak126816 (-77320)
snx9b	ENSDARG00000069302	20:43119307-43182422	wt	mut	OK	8.07047	5.2105	-0.631229	-1.60628	0.0025	0.0290455	peak133156 (+80919)
ywhaz	ENSDARG00000032575	19:12244899-12274094	wt	mut	OK	177.764	113.52	-0.647017	-3.08491	5e-05	0.0012271	peak105294 (+31186)
odc1	ENSDARG00000007377	17:51654872-51668516	wt	mut	OK	53.2048	33.5529	-0.665117	-2.81753	5e-05	0.0012271	peak91367 (-16595), peak91368 (-15988)
vezf1a	ENSDARG00000008247	10:37139888-37183005	wt	mut	OK	8.07	5.03498	-0.680583	-2.10474	0.0004	0.00703486	peak18528 (+27231)
rgs4	ENSDARG00000070047	6:35378841-35383561	wt	mut	OK	9.61247	5.90167	-0.703784	-2.44496	5e-05	0.0012271	peak219131 (-8545)
cflara	ENSDARG00000055966	11:30085774-30094247	wt	mut	OK	9.65438	5.61075	-0.78299	-2.41914	5e-05	0.0012271	peak26424 (+27917)
si:ch211-113a14.10	ENSDARG00000089044	25:35783062-35783374	wt	mut	OK	167.948	96.2467	-0.803204	-2.5502	5e-05	0.0012271	peak224876 (-216311), peak224913 (-828)
si:ch211-113a14.10	ENSDARG00000089044	25:35783062-35783374	wt	mut	OK	167.948	96.2467	-0.803204	-2.5502	5e-05	0.0012271	peak224848 (-1174)
si:ch211-113a14.10	ENSDARG00000089044	25:35783062-35783374	wt	mut	OK	167.948	96.2467	-0.803204	-2.5502	5e-05	0.0012271	peak224876 (-45740)
cldn11b	ENSDARG00000030723	24:26287499-26296277	wt	mut	OK	7.90676	4.32879	-0.869123	-2.83796	5e-05	0.0012271	peak167194 (-20173)
akr7a3	ENSDARG00000016649	11:41226228-41241747	wt	mut	OK	15.7208	7.92668	-0.987883	-1.76051	0.0041	0.0418812	peak28763 (-113042)
hspb8	ENSDARG00000058365	5:15319430-15340268	wt	mut	OK	11.9838	4.45649	-1.4271	-3.7157	5e-05	0.0012271	peak200727 (-30306)
cross-listing between DEGs and up DOCRs from WT and vsxKO
78 genes	115 peaks
(46 upregulated)
(32 downregulated)

## Sheet: gene_DOWNpeak
gene_id	gene	locus	sample_1	sample_2	status	value_1	value_2	log2.fold_change	test_stat	p_value	q_value	associated peak
ENSDARG00000074635	abca1a	1:51925840-51993670	wt	mut	OK	4.6374	9.01175	0.958493	2.17759	0.0001	0.00224065	peak10047 (-22645)
ENSDARG00000016474	galcb	17:18869800-18878279	wt	mut	OK	4.44335	8.29217	0.900101	3.00818	5e-05	0.0012271	peak85078 (-438332)
ENSDARG00000003974	spoplb	11:33555376-33580480	wt	mut	OK	18.839	33.8985	0.847501	3.60564	5e-05	0.0012271	peak27136 (-117451), peak27157 (-37331)
ENSDARG00000070028	tmem41aa	9:12473290-12484318	wt	mut	OK	5.62016	9.30572	0.727508	2.1993	0.00015	0.00315604	peak252790 (+74675)
ENSDARG00000068217	stx2b	8:44217954-44230779	wt	mut	OK	11.9479	18.8842	0.660424	2.17273	0.00015	0.00315604	peak248280 (+30137)
ENSDARG00000103785	sult2st2	12:642392-650599	wt	mut	OK	8.953	13.673	0.610892	1.86231	0.00185	0.0231458	peak29928 (-17249)
ENSDARG00000002593	slc45a2	21:19409305-19447653	wt	mut	OK	7.29853	10.5279	0.528535	1.80541	0.0019	0.0236342	peak139278 (-12607)
ENSDARG00000044596	pgap2	21:30937001-30957882	wt	mut	OK	9.50354	13.5051	0.506973	1.69128	0.00355	0.0377376	peak141665 (+16028)
ENSDARG00000038213	slc35b1	3:20813421-20832966	wt	mut	OK	20.5028	28.7621	0.488349	2.10903	0.00035	0.00635637	peak180642 (-120550)
ENSDARG00000038213	slc35b1	3:20813421-20832966	wt	mut	OK	20.5028	28.7621	0.488349	2.10903	0.00035	0.00635637	peak180642 (+43935)
ENSDARG00000031222	lhx2b	8:3026370-3042643	wt	mut	OK	18.1979	25.3059	0.475704	2.0005	0.00055	0.00903729	peak240219 (-216376)
ENSDARG00000026865	fam107b	18:12307848-12358760	wt	mut	OK	19.8206	27.5292	0.473963	1.58531	0.005	0.0482736	peak94436 (-46585)
ENSDARG00000101471	fgd4a	18:12168573-12260806	wt	mut	OK	6.08585	8.43528	0.470977	1.70583	0.00275	0.031112	peak94380 (-70794)
ENSDARG00000008540	sox21b	9:53736848-53738215	wt	mut	OK	20.0179	27.709	0.469061	1.87545	0.0007	0.0109792	peak261452 (-31406)
ENSDARG00000075549	cdh5	7:44106369-44250008	wt	mut	OK	5.51797	7.59786	0.461455	1.66123	0.004	0.0411766	peak233574 (-602634), peak233718 (+130779)
ENSDARG00000021442	cdh11	7:43420923-43501455	wt	mut	OK	13.8708	18.4614	0.412467	1.85213	0.00165	0.0211497	peak233574 (-70081)
ENSDARG00000004692	nabp1a	9:24403790-24407498	wt	mut	OK	68.3973	52.5684	-0.379744	-1.7068	0.0029	0.0323424	peak255332 (-684170), peak255326 (-662091)
ENSDARG00000074166	birc6	17:22567519-22721893	wt	mut	OK	10.4695	7.71181	-0.441049	-2.07279	0.0004	0.00703486	peak85811 (+156510)
ENSDARG00000099298	xrcc5	9:53018678-53058160	wt	mut	OK	56.6795	41.4711	-0.45072	-2.05225	0.0003	0.00565055	peak261303 (+46826), peak261283 (+86523)
ENSDARG00000102937	hspbp1	3:13450867-13468536	wt	mut	OK	25.9468	18.831	-0.462445	-1.92191	0.0012	0.0166562	peak179071 (-621)
ENSDARG00000037488	canx	14:16127084-16171210	wt	mut	OK	89.6226	63.9318	-0.487329	-2.35624	5e-05	0.0012271	peak53012 (-80599)
ENSDARG00000073978	crabp2a	16:14493358-14506883	wt	mut	OK	36.2778	25.552	-0.505652	-2.18954	0.00015	0.00315604	peak73107 (-20097)
ENSDARG00000073978	crabp2a	16:14493358-14506883	wt	mut	OK	36.2778	25.552	-0.505652	-2.18954	0.00015	0.00315604	peak73107 (+510316)
ENSDARG00000014680	znf710a	18:26061595-26110160	wt	mut	OK	21.1634	14.86	-0.510138	-2.15759	0.0001	0.00224065	peak97770 (-92669)
ENSDARG00000104374	smchd1	7:71345103-71469295	wt	mut	OK	9.53169	6.61186	-0.527676	-2.30575	0.00015	0.00315604	peak239009 (+52160)
ENSDARG00000100833	si:dkey-269i1.4	20:12559245-12563583	wt	mut	OK	1025.67	706.895	-0.537006	-2.48706	5e-05	0.0012271	peak32587 (+103839)
ENSDARG00000002872	zgc:113210	3:52392480-52406579	wt	mut	OK	8.05409	5.49446	-0.551742	-1.9459	0.00075	0.0116365	peak187161 (+41053)
ENSDARG00000087937	cdk4	11:170967-197220	wt	mut	OK	11.3336	7.70347	-0.557024	-1.71154	0.00285	0.03195	peak20300 (-14535)
ENSDARG00000038228	sepw2a	3:19958478-19968602	wt	mut	OK	116.849	79.2988	-0.559272	-2.70339	5e-05	0.0012271	peak180598 (-561695), peak180586 (-517263)
ENSDARG00000017910	pdss1	24:5985969-5995137	wt	mut	OK	27.5296	18.6589	-0.561119	-2.3042	0.0001	0.00224065	peak163191 (+192)
ENSDARG00000016357	fmo5	20:15184947-15205206	wt	mut	OK	41.9544	27.7979	-0.593848	-2.37706	5e-05	0.0012271	peak127022 (+2450)
ENSDARG00000069302	snx9b	20:43119307-43182422	wt	mut	OK	8.07047	5.2105	-0.631229	-1.60628	0.0025	0.0290455	peak133163 (+53333)
ENSDARG00000079949	supt16h	7:1415255-1483171	wt	mut	OK	50.0818	31.7171	-0.659023	-3.07604	5e-05	0.0012271	peak224557 (+27068)
ENSDARG00000070047	rgs4	6:35378841-35383561	wt	mut	OK	9.61247	5.90167	-0.703784	-2.44496	5e-05	0.0012271	peak219127 (-34764)
ENSDARG00000102265	smarcal1	9:52812378-52951072	wt	mut	OK	9.24305	5.2921	-0.804529	-1.74987	0.0022	0.0263587	peak261288 (+156228)
ENSDARG00000025033	stx5a	14:8288252-8310549	wt	mut	OK	8.36531	4.5132	-0.890268	-3.32629	5e-05	0.0012271	peak51872 (+25392)
ENSDARG00000075467	shisa3	14:46212991-46219704	wt	mut	OK	24.7396	13.0787	-0.919604	-4.17746	5e-05	0.0012271	peak59417 (-31844)
ENSDARG00000004889	aga	14:36088126-36096935	wt	mut	OK	16.6456	7.26917	-1.19528	-3.82878	5e-05	0.0012271	peak262769 (-191573)
ENSDARG00000071345	mgst2	14:47229410-47232807	wt	mut	OK	39.1203	16.3097	-1.26219	-4.57443	5e-05	0.0012271	peak59630 (-138)
ENSDARG00000038585	eif4e2	2:45263737-45282612	wt	mut	OK	8.87988	3.16265	-1.4894	-4.30817	5e-05	0.0012271	peak121900 (-1342)
ENSDARG00000044488	pak1ip1	24:36270672-36287293	wt	mut	OK	57.8949	5.94106	-3.28464	-11.0062	5e-05	0.0012271	peak169043 (-20668), peak169042 (+34)
cross-listing between DEGs and down DOCRs from WT and vsxKO
41 genes	47 peaks
(16 upregulated)
(25 downregulated)
