# Supplementary material for: Mutation of vsx genes in zebrafish highlights the robustness of the retinal specification network
Source: eLife. 2023 May 25;12:e85594. doi: 10.7554/eLife.85594 (PMC10212559; doi:10.7554/eLife.85594)
Supplement: Figure 5—source data 4. — Worksheet #1. Table of contents. Worksheet #2. List of differentially expressed genes (DEGs) with q-value <0.05 between WT (uninjected) and vsx2-morpholino-injected embryos. Worksheet #3. List of differentially expressed genes (DEGs) with q-value <0.05 between vsx2-morpholino-injected and vsxKO embryos. [file elife-85594-fig5-data4.xlsx]

## Sheet: SD4_index
worksheet_order	worksheet_title	description
1	SD4_index	Table of contents Figure 5 - Source Data 4
2	DEG_WT_MO (874)	List of differentially expressed genes (DEGs) with q-value < 0.05 between WT (uninjected) and vsx2-morpholino-injected embryos
3	DEG_vsxKO_MO (1795)	List of differentially expressed genes (DEGs) with q-value < 0.05 between vsx2-morpholino-injected and vsxKO embryos

## Sheet: DEG_WT_MO (874)
gene_id	gene	locus	sample_1	sample_2	status	value_1	value_2	V1+V2	log2.fold_change	test_stat	p_value	q_value	significant
ENSDARG00000095252	si:dkey-40h20.1	24:21977062-22395695	wt	Mo	OK	0.33661	19.0826	19.4192	5.82503	3.58664	5e-05	0.00153795	yes
ENSDARG00000079403	si:dkey-204l11.1	5:34923255-34940827	wt	Mo	OK	1.14214	43.3911	44.5332	5.24759	13.3354	5e-05	0.00153795	yes
ENSDARG00000087236	HIST1H4B	25:35812927-35813239	wt	Mo	OK	10.056	271.134	281.19	4.75288	8.69035	5e-05	0.00153795	yes
ENSDARG00000078994	muc2.2	25:8239884-8274712	wt	Mo	OK	1.28441	27.0721	28.3565	4.39763	10.2397	5e-05	0.00153795	yes
ENSDARG00000102334	si:ch211-124n19.2	9:56542460-56596681	wt	Mo	OK	1.21173	21.0972	22.3089	4.12191	3.98195	5e-05	0.00153795	yes
ENSDARG00000001354	slc6a13l	6:41146666-41163481	wt	Mo	OK	2.05546	0.955985	3.01145	-1.1044	-2.23535	0.0003	0.00678651	yes
ENSDARG00000095893	si:dkey-85n7.7	20:27323758-27326788	wt	Mo	OK	0.855687	12.8265	13.6822	3.9059	4.1765	5e-05	0.00153795	yes
ENSDARG00000069282	bbc3	15:23809951-23826315	wt	Mo	OK	0.808381	9.56875	10.3771	3.56522	9.00634	5e-05	0.00153795	yes
ENSDARG00000001776	stim2b	7:62009971-62129710	wt	Mo	OK	2.76666	1.76244	4.5291	-0.650573	-1.78773	0.00205	0.0279355	yes
ENSDARG00000001782	prkacba	11:8119828-8141055	wt	Mo	OK	1.87519	0.447054	2.32224	-2.06852	-2.70292	5e-05	0.00153795	yes
ENSDARG00000001817	CABZ01112877.1	2:55460659-55478306	wt	Mo	OK	0.196613	2.06366	2.26027	3.39177	2.01222	0.00335	0.0400082	yes
ENSDARG00000093591	si:ch211-282k23.2	18:39947032-39948342	wt	Mo	OK	0.842146	9.26571	10.1079	3.45976	5.67965	5e-05	0.00153795	yes
ENSDARG00000076554	cdkn1a	22:565658-570089	wt	Mo	OK	2.77352	26.8275	29.601	3.27392	7.42122	5e-05	0.00153795	yes
ENSDARG00000001999	adamts18	7:42124936-42212627	wt	Mo	OK	3.65413	6.06246	9.71659	0.730375	2.45669	5e-05	0.00153795	yes
ENSDARG00000002002	lmcd1	22:39110326-39121442	wt	Mo	OK	2.36604	4.7979	7.16394	1.01993	1.92251	0.00145	0.0219063	yes
ENSDARG00000002084	lamb2	23:20253815-20332147	wt	Mo	OK	1.60927	0.897576	2.50685	-0.842298	-2.13126	0.0003	0.00678651	yes
ENSDARG00000070285	si:ch211-113a14.21	25:35796147-35796459	wt	Mo	OK	35.7725	307.956	343.728	3.1058	7.30772	5e-05	0.00153795	yes
ENSDARG00000002298	ankrd22	12:17032780-17036761	wt	Mo	OK	2.62765	1.02881	3.65646	-1.3528	-2.23138	0.0006	0.0117405	yes
ENSDARG00000002347	cyp11a1	25:22222391-22265705	wt	Mo	OK	6.51325	3.00087	9.51412	-1.118	-2.36726	5e-05	0.00153795	yes
ENSDARG00000094584	si:ch211-92l17.1	4:15607088-15817785	wt	Mo	OK	1.84591	14.7685	16.6144	3.00012	2.54498	0.0009	0.0156103	yes
ENSDARG00000070280	zgc:173652	25:35798681-35799293	wt	Mo	OK	26.9667	192.836	219.803	2.83813	8.01677	5e-05	0.00153795	yes
ENSDARG00000035852	cart3	7:52691506-52692368	wt	Mo	OK	5.85935	40.6508	46.5101	2.79447	6.5058	5e-05	0.00153795	yes
ENSDARG00000002411	pde4cb	11:6675128-6783536	wt	Mo	OK	3.5839	2.27255	5.85645	-0.65722	-1.7067	0.0037	0.0429874	yes
ENSDARG00000078567	lonrf1l	8:13605280-13750606	wt	Mo	OK	3.64704	24.7072	28.3542	2.76013	7.3329	5e-05	0.00153795	yes
ENSDARG00000002508	ankrd33ab	6:39281567-39288493	wt	Mo	OK	1.11021	0.324119	1.43433	-1.77624	-1.53248	0.00405	0.0458696	yes
ENSDARG00000103788	si:rp71-1d10.6	14:24755564-24758551	wt	Mo	OK	2.96464	19.6266	22.5912	2.72688	5.6034	5e-05	0.00153795	yes
ENSDARG00000002533	adora2b	5:62096899-62116998	wt	Mo	OK	3.688	1.20838	4.89638	-1.60976	-3.01103	5e-05	0.00153795	yes
ENSDARG00000012499	per1b	7:50547394-50571221	wt	Mo	OK	1.88645	12.2436	14.1301	2.69828	8.62702	5e-05	0.00153795	yes
ENSDARG00000035559	tp53	5:23582426-23594005	wt	Mo	OK	52.0943	321.194	373.288	2.62425	8.2952	5e-05	0.00153795	yes
ENSDARG00000002597	pabpc1l	8:45326435-45344091	wt	Mo	OK	0.396362	1.18504	1.5814	1.58005	1.69807	0.00375	0.0433328	yes
ENSDARG00000002663	optn	4:8007827-8018689	wt	Mo	OK	4.57391	2.68461	7.25852	-0.768716	-2.02416	0.0005	0.0100956	yes
ENSDARG00000095377	si:ch211-28e16.4	23:22649672-22679364	wt	Mo	OK	1.60134	9.45196	11.0533	2.56133	2.96238	0.0005	0.0100956	yes
ENSDARG00000002795	meis3	15:6840537-6866520	wt	Mo	OK	5.43043	3.21486	8.64529	-0.75631	-1.66111	0.0032	0.0387033	yes
ENSDARG00000002840	si:dkey-28b4.8	1:43950423-44002958	wt	Mo	OK	4.05734	1.54347	5.60081	-1.39436	-4.06146	5e-05	0.00153795	yes
ENSDARG00000002947	abcd3b	2:15440937-15456922	wt	Mo	OK	6.0987	3.68916	9.78786	-0.725208	-2.00412	0.0004	0.00842463	yes
ENSDARG00000002968	a1cf	12:6126861-6144310	wt	Mo	OK	3.54635	1.60539	5.15174	-1.14342	-2.73402	5e-05	0.00153795	yes
ENSDARG00000003081	mybphb	6:55022625-55070995	wt	Mo	OK	1.25533	0.530649	1.78598	-1.24224	-1.16173	0.0036	0.0421982	yes
ENSDARG00000037804	phlda3	23:5822469-5825270	wt	Mo	OK	3.16985	18.4335	21.6033	2.53984	6.69161	5e-05	0.00153795	yes
ENSDARG00000034503	per2	2:48455429-48521197	wt	Mo	OK	2.13824	12.3157	14.4539	2.52601	7.81291	5e-05	0.00153795	yes
ENSDARG00000019498	cry5	10:39291387-39362396	wt	Mo	OK	2.40439	13.2049	15.6093	2.45732	2.19768	0.00135	0.0208938	yes
ENSDARG00000003403	tenm1	5:20790406-21015713	wt	Mo	OK	1.18958	0.549977	1.73956	-1.11301	-2.92484	5e-05	0.00153795	yes
ENSDARG00000003420	chrna5	18:40496136-40518814	wt	Mo	OK	4.00093	2.4177	6.41863	-0.726701	-1.73001	0.00285	0.0357599	yes
ENSDARG00000045768	cry1aa	4:12014192-12027687	wt	Mo	OK	5.4236	27.6593	33.0829	2.35044	7.27534	5e-05	0.00153795	yes
ENSDARG00000058325	casp8	6:12811026-12821868	wt	Mo	OK	3.954	18.6651	22.6191	2.23895	6.55292	5e-05	0.00153795	yes
ENSDARG00000003449	pde10a	13:4376054-4492127	wt	Mo	OK	0.84934	0.422768	1.27211	-1.00648	-1.76752	0.00365	0.042522	yes
ENSDARG00000062788	irg1l	14:11121037-11124596	wt	Mo	OK	2.07505	9.66467	11.7397	2.21958	5.18073	5e-05	0.00153795	yes
ENSDARG00000033443	mdm2	4:23404713-23415116	wt	Mo	OK	26.4796	121.346	147.826	2.19617	4.65987	5e-05	0.00153795	yes
ENSDARG00000102181	Metazoa_SRP	11:11477184-11477481	wt	Mo	OK	192.324	852.495	1044.82	2.14815	7.02788	5e-05	0.00153795	yes
ENSDARG00000003808	aqp3a	5:42406268-42411661	wt	Mo	OK	4.13206	1.2164	5.34846	-1.76425	-3.66108	5e-05	0.00153795	yes
ENSDARG00000003820	nr1d2a	16:49879774-49907024	wt	Mo	OK	0.417444	1.81897	2.23641	2.12347	1.97527	5e-05	0.00153795	yes
ENSDARG00000076667	ccng1	14:21831850-21842968	wt	Mo	OK	270.01	1158.39	1428.4	2.10103	6.88285	5e-05	0.00153795	yes
ENSDARG00000003900	si:dkeyp-111e5.4	6:42034299-42039149	wt	Mo	OK	0.352354	0.840222	1.19258	1.25374	1.82562	0.0028	0.0353922	yes
ENSDARG00000003925	cx28.6	17:14703831-14704666	wt	Mo	OK	2.22835	0.659253	2.8876	-1.75707	-2.2196	0.00185	0.0258486	yes
ENSDARG00000056292	vsx1	17:21043566-21046269	wt	Mo	OK	3.88436	15.8753	19.7597	2.03103	5.53172	5e-05	0.00153795	yes
ENSDARG00000000018	nrf1	4:15082629-15104891	wt	Mo	OK	11.5046	46.9959	58.5005	2.03032	7.10201	5e-05	0.00153795	yes
ENSDARG00000075048	lonrf1	14:33704969-33752430	wt	Mo	OK	3.62929	14.739	18.3683	2.02188	5.57501	5e-05	0.00153795	yes
ENSDARG00000051736	zgc:114037	25:35778804-35779286	wt	Mo	OK	13.4814	52.7659	66.2473	1.96863	4.62597	5e-05	0.00153795	yes
ENSDARG00000009594	nr1d2b	19:17941697-17948550	wt	Mo	OK	3.81389	13.3931	17.207	1.81216	4.8481	5e-05	0.00153795	yes
ENSDARG00000004256	wnt11	5:35913451-35919964	wt	Mo	OK	1.19466	2.95048	4.14514	1.30435	2.81919	5e-05	0.00153795	yes
ENSDARG00000076933	aldh1a3	7:9476220-9557990	wt	Mo	OK	6.25409	21.616	27.8701	1.78923	5.6647	5e-05	0.00153795	yes
ENSDARG00000004406	spra	5:71345201-71352042	wt	Mo	OK	2.83009	4.70445	7.53454	0.733176	1.97382	0.001	0.0168992	yes
ENSDARG00000089044	si:ch211-113a14.10	25:35783062-35783374	wt	Mo	OK	166.566	570.963	737.529	1.7773	4.66498	5e-05	0.00153795	yes
ENSDARG00000096603	bmb	25:35735003-35760296	wt	Mo	OK	4.64232	15.9012	20.5435	1.77622	3.58652	5e-05	0.00153795	yes
ENSDARG00000004529	zgc:173742	18:14265040-14363548	wt	Mo	OK	2.35953	0.541221	2.90075	-2.12421	-1.90006	0.00285	0.0357599	yes
ENSDARG00000102550	CABZ01080370.1	15:49204-61507	wt	Mo	OK	4.33635	14.8101	19.1465	1.77203	2.34469	0.00015	0.00390457	yes
ENSDARG00000004580	nmnat2	2:36043725-36058363	wt	Mo	OK	1.26533	0.488759	1.75409	-1.37231	-2.11679	0.00095	0.0162469	yes
ENSDARG00000087670	si:dkey-108k21.28	25:34608621-34608933	wt	Mo	OK	83.4074	284.835	368.242	1.77188	5.08552	5e-05	0.00153795	yes
ENSDARG00000004712	tbr1b	9:51970052-51976287	wt	Mo	OK	1.55679	2.50767	4.06446	0.687776	1.77842	0.0022	0.0295325	yes
ENSDARG00000096310	wu:fj64h06	21:5693388-5731623	wt	Mo	OK	11.8124	40.2257	52.0381	1.76781	4.89626	5e-05	0.00153795	yes
ENSDARG00000053136	b2m	4:12794546-12796640	wt	Mo	OK	3.47112	11.5888	15.0599	1.73925	3.61945	5e-05	0.00153795	yes
ENSDARG00000093639	si:dkey-90a24.1	5:24067949-24208605	wt	Mo	OK	3.08269	9.78444	12.8671	1.6663	1.91906	0.00345	0.0409451	yes
ENSDARG00000092875	si:dkey-264b2.3	2:59238554-59239737	wt	Mo	OK	4.45977	13.8278	18.2876	1.63254	3.59377	5e-05	0.00153795	yes
ENSDARG00000058094	ciarta	19:9009508-9021143	wt	Mo	OK	5.66535	17.4238	23.0892	1.62082	5.169	5e-05	0.00153795	yes
ENSDARG00000005320	nipsnap1	5:11532584-11563164	wt	Mo	OK	2.44648	0.612904	3.05938	-1.99697	-3.20379	5e-05	0.00153795	yes
ENSDARG00000005356	tyro3	17:10345612-10397504	wt	Mo	OK	5.35965	3.534	8.89365	-0.600839	-1.7646	0.0018	0.025441	yes
ENSDARG00000005541	wif1	4:12932913-12957869	wt	Mo	OK	4.76666	3.01444	7.7811	-0.661085	-1.66221	0.00445	0.0490676	yes
ENSDARG00000093612	si:dkey-92i17.2	14:10301431-10311979	wt	Mo	OK	18.8661	57.2176	76.0837	1.60066	5.17265	5e-05	0.00153795	yes
ENSDARG00000085497	RNaseP_nuc	2:42737319-42737617	wt	Mo	OK	4438.62	13429.1	17867.7	1.59718	5.47727	5e-05	0.00153795	yes
ENSDARG00000096757	si:ch73-205h11.1	12:31422701-31441102	wt	Mo	OK	3.69088	11.0528	14.7437	1.58237	3.80655	5e-05	0.00153795	yes
ENSDARG00000094300	NUPR2	5:1732439-1734163	wt	Mo	OK	44.2592	131.048	175.307	1.56604	5.12844	5e-05	0.00153795	yes
ENSDARG00000005574	vsx2	17:31635676-31642707	wt	Mo	OK	34.3274	101.283	135.61	1.56096	5.57333	5e-05	0.00153795	yes
ENSDARG00000098834	sox4b	16:68068-69930	wt	Mo	OK	3.37588	9.88945	13.2653	1.55063	4.19701	5e-05	0.00153795	yes
ENSDARG00000026281	lyrm1	24:39556026-39630783	wt	Mo	OK	3.8688	11.1668	15.0356	1.52926	2.8341	5e-05	0.00153795	yes
ENSDARG00000005842	cd9a	18:7163614-7184958	wt	Mo	OK	3.06847	5.48295	8.55142	0.837432	1.92362	0.001	0.0168992	yes
ENSDARG00000005924	serpina10a	20:27397941-27482616	wt	Mo	OK	1.65722	0.706042	2.36326	-1.23094	-2.1008	0.00095	0.0162469	yes
ENSDARG00000079783	isg20	25:18997279-19020176	wt	Mo	OK	43.6032	124.112	167.715	1.50914	5.30859	5e-05	0.00153795	yes
ENSDARG00000042727	exo5	15:25149555-25158761	wt	Mo	OK	10.0263	27.9494	37.9757	1.47903	4.65734	5e-05	0.00153795	yes
ENSDARG00000102728	si:ch73-353n11.1	21:29934035-29943063	wt	Mo	OK	9.78066	27.1461	36.9268	1.47274	6.31871	0.0038	0.0437332	yes
ENSDARG00000006110	chd	15:46557483-46594812	wt	Mo	OK	2.30163	4.11176	6.41339	0.837098	2.31167	5e-05	0.00153795	yes
ENSDARG00000006220	ugt1ab	9:9998613-10032338	wt	Mo	OK	0.910707	0.150825	1.06153	-2.59411	-1.53777	0.00335	0.0400082	yes
ENSDARG00000053554	wdr76	7:29930460-29938640	wt	Mo	OK	13.897	37.9815	51.8785	1.45052	4.70325	5e-05	0.00153795	yes
ENSDARG00000006288	prdm5	23:1916206-2027219	wt	Mo	OK	4.81936	3.15116	7.97052	-0.612959	-1.75962	0.00285	0.0357599	yes
ENSDARG00000103068	Metazoa_SRP	11:11478684-11478981	wt	Mo	OK	1683.34	4593.76	6277.1	1.44835	5.18769	5e-05	0.00153795	yes
ENSDARG00000020573	ddx3a	9:33523730-33543992	wt	Mo	OK	21.6103	58.5315	80.1418	1.4375	3.1503	5e-05	0.00153795	yes
ENSDARG00000039117	tefa	12:19022958-19031303	wt	Mo	OK	56.4352	149.919	206.354	1.40952	4.78329	5e-05	0.00153795	yes
ENSDARG00000015822	sesn3	15:35185037-35234766	wt	Mo	OK	8.84599	23.081	31.927	1.38361	4.79111	5e-05	0.00153795	yes
ENSDARG00000006491	agpat9l	5:8415059-8452430	wt	Mo	OK	1.34598	0.555069	1.90105	-1.27792	-2.31103	0.0003	0.00678651	yes
ENSDARG00000051756	pdhx	25:36857606-36864690	wt	Mo	OK	2.8449	7.37213	10.217	1.37371	3.38122	5e-05	0.00153795	yes
ENSDARG00000006760	slc24a3	13:26943450-27079551	wt	Mo	OK	1.69048	0.294299	1.98478	-2.52208	-3.38028	0.0001	0.00278989	yes
ENSDARG00000042825	rnf169	15:4964391-4993930	wt	Mo	OK	5.68425	14.7109	20.3952	1.37184	4.30264	5e-05	0.00153795	yes
ENSDARG00000006840	gnmt	17:48885684-48899800	wt	Mo	OK	3.05606	1.63841	4.69447	-0.899381	-1.73861	0.0036	0.0421982	yes
ENSDARG00000095615	si:dkeyp-86h10.3	16:20503551-20506327	wt	Mo	OK	3.0612	7.78119	10.8424	1.34589	3.55416	5e-05	0.00153795	yes
ENSDARG00000006978	zak	9:2890882-2930145	wt	Mo	OK	0.44573	1.64536	2.09109	1.88416	2.71086	5e-05	0.00153795	yes
ENSDARG00000036965	rnf24	1:41066428-41116690	wt	Mo	OK	6.50781	16.2177	22.7255	1.31733	3.22033	5e-05	0.00153795	yes
ENSDARG00000007040	tmigd1	21:39902436-39907732	wt	Mo	OK	1.2597	2.50487	3.76457	0.991659	1.76715	0.00305	0.03758	yes
ENSDARG00000002396	cry-dash	24:20049602-20064055	wt	Mo	OK	7.38098	18.2374	25.6184	1.30502	4.09697	5e-05	0.00153795	yes
ENSDARG00000007086	aqp10a	16:22373352-22378875	wt	Mo	OK	1.04853	0.245332	1.29386	-2.09557	-2.1933	0.00065	0.0123928	yes
ENSDARG00000102379	si:zfos-80g12.1	14:30579943-30605000	wt	Mo	OK	4.1958	10.2414	14.4372	1.28739	3.8339	5e-05	0.00153795	yes
ENSDARG00000003244	gbp3	2:44041369-44102997	wt	Mo	OK	6.50246	15.8253	22.3278	1.28318	3.51849	5e-05	0.00153795	yes
ENSDARG00000042900	gtpbp1l	22:14811715-14827120	wt	Mo	OK	4.25722	10.3275	14.5847	1.27851	3.91357	5e-05	0.00153795	yes
ENSDARG00000007289	METRNL (1 of many)	1:56656254-56668369	wt	Mo	OK	0.305191	1.37068	1.67587	2.16711	2.19495	0.0018	0.025441	yes
ENSDARG00000017388	gstt1b	21:15617119-15624557	wt	Mo	OK	4.7394	11.3932	16.1326	1.2654	3.36529	5e-05	0.00153795	yes
ENSDARG00000051718	si:ch211-113a14.24	25:35818738-35819338	wt	Mo	OK	24.1612	57.6414	81.8026	1.25442	3.53535	5e-05	0.00153795	yes
ENSDARG00000007370	dysf	7:25287117-25426128	wt	Mo	OK	3.77259	2.01564	5.78823	-0.904316	-2.7953	5e-05	0.00153795	yes
ENSDARG00000007383	kcnk6	18:46173085-46210563	wt	Mo	OK	2.66881	4.09144	6.76025	0.616414	1.75816	0.00205	0.0279355	yes
ENSDARG00000007406	phox2a	15:46976197-46984969	wt	Mo	OK	1.02676	0.474484	1.50124	-1.11367	-2.20439	0.0007	0.0130978	yes
ENSDARG00000003462	fech	21:1622165-1644440	wt	Mo	OK	8.48766	20.2312	28.7189	1.25314	3.78502	5e-05	0.00153795	yes
ENSDARG00000022858	wnt7ba	4:18712965-18725201	wt	Mo	OK	9.90867	23.3096	33.2183	1.23416	3.80997	5e-05	0.00153795	yes
ENSDARG00000042904	foxo3b	20:32368027-32502572	wt	Mo	OK	10.9946	25.8381	36.8327	1.23271	2.26665	5e-05	0.00153795	yes
ENSDARG00000005774	ddx3b	6:59808617-60109705	wt	Mo	OK	39.964	93.5464	133.51	1.22698	1.92125	0.0006	0.0117405	yes
ENSDARG00000077396	tlcd2	15:25462861-25499820	wt	Mo	OK	3.36538	7.75003	11.1154	1.20343	3.52661	5e-05	0.00153795	yes
ENSDARG00000008026	fam129bb	5:28316727-28369009	wt	Mo	OK	5.16632	2.76994	7.93626	-0.89928	-2.61941	5e-05	0.00153795	yes
ENSDARG00000007077	si:dkey-145p14.5	9:33049408-33064822	wt	Mo	OK	13.6178	31.3228	44.9406	1.20172	3.85878	5e-05	0.00153795	yes
ENSDARG00000094557	nupr1	3:15355474-15356358	wt	Mo	OK	5.62974	12.8694	18.4991	1.1928	2.64196	5e-05	0.00153795	yes
ENSDARG00000015611	rasl11b	20:22900183-23132611	wt	Mo	OK	4.85995	11.0576	15.9176	1.18602	2.10332	0.00035	0.0076251	yes
ENSDARG00000008305	hand2	1:37473968-37475834	wt	Mo	OK	4.54918	1.33542	5.8846	-1.76831	-3.73794	5e-05	0.00153795	yes
ENSDARG00000021547	vrk2	13:26573446-26668794	wt	Mo	OK	7.02178	15.7623	22.7841	1.16657	2.32929	0.0002	0.00492144	yes
ENSDARG00000012968	rhoub	15:9014505-9026086	wt	Mo	OK	34.2977	76.146	110.444	1.15066	4.07907	5e-05	0.00153795	yes
ENSDARG00000062045	il1rapl1a	9:29905633-30183392	wt	Mo	OK	5.02714	11.1595	16.1866	1.15047	1.97612	0.00105	0.0175705	yes
ENSDARG00000003963	traf4a	15:15580589-15657241	wt	Mo	OK	8.13186	17.8663	25.9982	1.13558	3.8074	5e-05	0.00153795	yes
ENSDARG00000091627	si:dkey-271j15.3	16:21324852-21334279	wt	Mo	OK	5.21977	11.3567	16.5765	1.12148	2.67041	5e-05	0.00153795	yes
ENSDARG00000020465	ewsr1b	5:24369395-24378762	wt	Mo	OK	184.583	401.136	585.719	1.11982	3.44859	5e-05	0.00153795	yes
ENSDARG00000008732	zgc:66479	6:46734368-46740573	wt	Mo	OK	0.946962	1.8764	2.82336	0.98659	2.02597	0.0008	0.0143865	yes
ENSDARG00000008807	bokb	2:22984563-22994784	wt	Mo	OK	2.31433	4.26956	6.58389	0.883493	2.00333	0.00055	0.0108993	yes
ENSDARG00000102572	si:ch211-260e23.9	7:45731082-45737495	wt	Mo	OK	12.7068	27.5741	40.2809	1.11772	3.22653	5e-05	0.00153795	yes
ENSDARG00000105507	si:ch1073-159d7.13	7:6329650-6330302	wt	Mo	OK	82.5795	179.143	261.722	1.11726	3.42302	5e-05	0.00153795	yes
ENSDARG00000070131	rpp25l	16:41582583-41585681	wt	Mo	OK	3.46863	7.29045	10.7591	1.07164	2.20464	5e-05	0.00153795	yes
ENSDARG00000008969	fgb	1:9367651-9375385	wt	Mo	OK	4.91758	1.15762	6.0752	-2.08678	-2.19227	5e-05	0.00153795	yes
ENSDARG00000007241	mycb	2:32033037-32035153	wt	Mo	OK	6.51607	13.6095	20.1256	1.06254	3.12711	5e-05	0.00153795	yes
ENSDARG00000009018	rhbg	16:29331172-29342541	wt	Mo	OK	1.47734	0.542761	2.0201	-1.44461	-3.00185	5e-05	0.00153795	yes
ENSDARG00000009313	zgc:63831	3:24990607-25004561	wt	Mo	OK	5.21394	2.018	7.23194	-1.36945	-3.29776	5e-05	0.00153795	yes
ENSDARG00000009550	foxi3b	14:34174021-34176273	wt	Mo	OK	3.53552	2.0867	5.62222	-0.760698	-1.68988	0.0042	0.0471006	yes
ENSDARG00000003421	igf2bp2a	9:12497431-12604573	wt	Mo	OK	3.36986	6.98587	10.3557	1.05175	2.9636	5e-05	0.00153795	yes
ENSDARG00000052789	azin1a	16:52820317-52850806	wt	Mo	OK	11.1896	23.039	34.2286	1.04192	2.60308	5e-05	0.00153795	yes
ENSDARG00000103892	CABZ01074203.1	11:43196034-43196829	wt	Mo	OK	3.32204	6.81252	10.1346	1.03612	2.09443	0.00075	0.0137623	yes
ENSDARG00000074686	mgea5	13:11856357-11873532	wt	Mo	OK	31.6487	64.5363	96.185	1.02796	3.72135	5e-05	0.00153795	yes
ENSDARG00000100657	egfl7	21:7666974-7703748	wt	Mo	OK	6.80872	13.8498	20.6585	1.02441	2.86618	5e-05	0.00153795	yes
ENSDARG00000010031	ssh1b	5:31318655-31328760	wt	Mo	OK	2.12305	3.77453	5.89758	0.830155	2.06609	0.0004	0.00842463	yes
ENSDARG00000010047	neu3.2	21:21760026-21762656	wt	Mo	OK	1.03957	3.07323	4.1128	1.56377	2.93747	5e-05	0.00153795	yes
ENSDARG00000010085	p4ha2	21:43102683-43136621	wt	Mo	OK	5.89257	3.79277	9.68534	-0.635646	-1.70201	0.00385	0.0441897	yes
ENSDARG00000053878	inpp5l	8:38388393-38444878	wt	Mo	OK	3.43434	6.97182	10.4062	1.0215	3.16624	5e-05	0.00153795	yes
ENSDARG00000010519	per3	11:39694893-39756935	wt	Mo	OK	5.42325	10.9869	16.4102	1.01856	2.37905	5e-05	0.00153795	yes
ENSDARG00000034504	lmo1	7:27776085-27918488	wt	Mo	OK	5.85041	11.7901	17.6405	1.01096	2.67713	5e-05	0.00153795	yes
ENSDARG00000058730	rdh10a	24:13107060-13128424	wt	Mo	OK	5.71109	11.475	17.1861	1.00666	2.43868	5e-05	0.00153795	yes
ENSDARG00000010276	ptgs2b	20:34218938-34224536	wt	Mo	OK	1.0132	3.64098	4.65418	1.84541	4.13286	5e-05	0.00153795	yes
ENSDARG00000010477	p2rx3a	14:21637085-21662467	wt	Mo	OK	3.78864	6.02639	9.81503	0.669615	1.75736	0.0024	0.0315002	yes
ENSDARG00000099274	atxn3	17:53196947-53203152	wt	Mo	OK	6.1194	12.2429	18.3623	1.00048	2.70347	5e-05	0.00153795	yes
ENSDARG00000100053	CABZ01044099.1	24:41654559-41756952	wt	Mo	OK	5.42676	10.8458	16.2726	0.998975	2.19705	0.0005	0.0100956	yes
ENSDARG00000010977	rab34b	21:26025756-26035080	wt	Mo	OK	5.07129	1.93468	7.00597	-1.39026	-2.59113	5e-05	0.00153795	yes
ENSDARG00000011208	COX5B (1 of many)	8:52419833-52426519	wt	Mo	OK	1.00182	0.390604	1.39242	-1.35885	-2.26412	0.00025	0.00588102	yes
ENSDARG00000037963	nek6	21:8263308-8304813	wt	Mo	OK	5.55657	11.0055	16.5621	0.985961	2.18959	0.0001	0.00278989	yes
ENSDARG00000011273	tlx2	14:5349844-5383529	wt	Mo	OK	1.11973	0.185759	1.30549	-2.59164	-2.20482	0.0007	0.0130978	yes
ENSDARG00000014929	p2ry11	3:54318122-54323383	wt	Mo	OK	4.26568	8.38663	12.6523	0.975317	2.39859	5e-05	0.00153795	yes
ENSDARG00000007302	sh3gl3b	25:19425002-19438380	wt	Mo	OK	3.62953	7.13275	10.7623	0.974674	2.01035	0.00085	0.0149401	yes
ENSDARG00000011573	abcb11a	9:49043038-49119634	wt	Mo	OK	2.60278	1.59519	4.19797	-0.706328	-1.85523	0.0019	0.0263534	yes
ENSDARG00000011583	cry1ab	18:15138005-15161184	wt	Mo	OK	3.2431	5.93323	9.17633	0.871443	2.52211	5e-05	0.00153795	yes
ENSDARG00000060994	fbxw7	1:24178199-24453610	wt	Mo	OK	18.4451	36.2171	54.6622	0.973435	3.15905	5e-05	0.00153795	yes
ENSDARG00000071439	si:dkey-121a9.3	22:23249841-23253113	wt	Mo	OK	3.6865	7.2148	10.9013	0.968708	1.93788	0.00085	0.0149401	yes
ENSDARG00000103618	btr18	19:3788105-3849697	wt	Mo	OK	3.82808	7.48229	11.3104	0.966857	2.56988	5e-05	0.00153795	yes
ENSDARG00000052154	lix1	5:64133317-64150043	wt	Mo	OK	20.0754	39.0988	59.1742	0.961695	3.00957	5e-05	0.00153795	yes
ENSDARG00000097489	si:ch73-390p7.2	23:17952625-17954985	wt	Mo	OK	7.54464	14.6861	22.2307	0.960927	2.40609	0.0001	0.00278989	yes
ENSDARG00000041481	smg5	16:45726696-45767497	wt	Mo	OK	5.78717	11.2644	17.0516	0.960844	3.12059	5e-05	0.00153795	yes
ENSDARG00000102051	mtbl	7:28877563-28878078	wt	Mo	OK	54.9971	106.971	161.968	0.959792	2.69634	5e-05	0.00153795	yes
ENSDARG00000012306	syt13	7:38444789-38466460	wt	Mo	OK	1.74235	0.417845	2.16019	-2.05999	-1.61767	0.0026	0.0335333	yes
ENSDARG00000003961	parp3	6:42040821-42051814	wt	Mo	OK	3.54276	6.85858	10.4013	0.953036	2.67587	5e-05	0.00153795	yes
ENSDARG00000042282	itga6a	9:3458132-3514959	wt	Mo	OK	11.9648	23.0662	35.031	0.946988	3.12825	5e-05	0.00153795	yes
ENSDARG00000069289	gabpa	9:35205327-35216332	wt	Mo	OK	18.2862	35.1047	53.3909	0.940908	2.94766	5e-05	0.00153795	yes
ENSDARG00000012640	cideb	7:23744349-23751183	wt	Mo	OK	3.98442	1.68551	5.66993	-1.24119	-2.00121	0.0009	0.0156103	yes
ENSDARG00000079930	si:dkeyp-68b7.5	2:57810754-57827100	wt	Mo	OK	5.74173	11.0039	16.7456	0.93846	1.69285	0.0012	0.0191619	yes
ENSDARG00000070429	C14orf1	17:51845267-51848922	wt	Mo	OK	5.98629	11.4518	17.4381	0.935841	2.10061	0.0005	0.0100956	yes
ENSDARG00000012829	asah2	12:6084097-6109089	wt	Mo	OK	0.845404	0.383412	1.22882	-1.14075	-1.90615	0.00155	0.0227929	yes
ENSDARG00000041140	ddb2	18:20479090-20490268	wt	Mo	OK	13.395	25.6115	39.0065	0.935102	3.06387	5e-05	0.00153795	yes
ENSDARG00000094154	hist2h3c	25:34546697-34547197	wt	Mo	OK	646.728	1230.1	1876.83	0.927541	2.94871	5e-05	0.00153795	yes
ENSDARG00000098261	rtkn2b	21:11218424-11235248	wt	Mo	OK	3.53474	6.70108	10.2358	0.92279	2.22784	5e-05	0.00153795	yes
ENSDARG00000044691	ppp1r3b	21:19879819-19883298	wt	Mo	OK	47.6896	90.215	137.905	0.919695	2.82758	5e-05	0.00153795	yes
ENSDARG00000091879	si:dkey-29d8.3	2:21527840-21642053	wt	Mo	OK	3.66142	6.92337	10.5848	0.919071	2.08794	0.0007	0.0130978	yes
ENSDARG00000013292	tmem179	20:27494577-27497478	wt	Mo	OK	4.29617	2.23806	6.53423	-0.940801	-1.94352	0.0016	0.0233674	yes
ENSDARG00000013295	slc2a3a	19:9766282-9793605	wt	Mo	OK	5.39086	0.861185	6.25204	-2.64612	-6.51332	5e-05	0.00153795	yes
ENSDARG00000013310	map3k15	24:25768120-25843795	wt	Mo	OK	4.87934	2.78013	7.65947	-0.811534	-2.50225	5e-05	0.00153795	yes
ENSDARG00000013317	pygmb	7:22552670-22581032	wt	Mo	OK	2.65605	0.697692	3.35374	-1.92862	-1.93467	0.0001	0.00278989	yes
ENSDARG00000075400	FBXO33	17:12878074-12884883	wt	Mo	OK	4.95704	9.37093	14.328	0.918713	2.57968	5e-05	0.00153795	yes
ENSDARG00000013371	isoc2	16:12903790-12919766	wt	Mo	OK	3.84146	1.45003	5.29149	-1.40557	-2.41461	0.00015	0.00390457	yes
ENSDARG00000057936	lhx5	21:15815539-15870923	wt	Mo	OK	19.7662	37.3137	57.0799	0.916669	3.16549	5e-05	0.00153795	yes
ENSDARG00000002405	si:ch211-225b11.1	5:20282966-20310868	wt	Mo	OK	3.64412	6.8763	10.5204	0.916061	2.8834	5e-05	0.00153795	yes
ENSDARG00000025859	lmf2b	4:9477583-9501930	wt	Mo	OK	6.22463	11.7402	17.9648	0.915392	2.8952	5e-05	0.00153795	yes
ENSDARG00000079753	kiz	17:42003252-42056379	wt	Mo	OK	6.40775	12.0533	18.4611	0.911534	2.30253	0.0001	0.00278989	yes
ENSDARG00000025797	abhd2a	7:13573154-13611473	wt	Mo	OK	3.59534	6.75913	10.3545	0.910709	2.35431	5e-05	0.00153795	yes
ENSDARG00000076839	ftr86	15:545649-555950	wt	Mo	OK	3.77321	7.08636	10.8596	0.909254	2.54261	5e-05	0.00153795	yes
ENSDARG00000043511	prdx6	20:15264924-15285256	wt	Mo	OK	27.1095	50.883	77.9925	0.908387	2.99272	5e-05	0.00153795	yes
ENSDARG00000014031	abcc2	13:551336-581285	wt	Mo	OK	5.47123	2.05135	7.52258	-1.41529	-4.13323	5e-05	0.00153795	yes
ENSDARG00000014068	pgam1b	1:54030015-54041212	wt	Mo	OK	4.02279	2.43683	6.45962	-0.723193	-1.76367	0.00265	0.033897	yes
ENSDARG00000014302	brinp2	2:34397564-34572688	wt	Mo	OK	2.39461	0.637927	3.03254	-1.90833	-4.05878	5e-05	0.00153795	yes
ENSDARG00000005551	hnrnph1l	21:30132914-30145069	wt	Mo	OK	43.9123	82.1452	126.058	0.903552	2.33781	5e-05	0.00153795	yes
ENSDARG00000036107	txnipa	19:24810336-24919663	wt	Mo	OK	37.965	70.9877	108.953	0.902899	2.72123	5e-05	0.00153795	yes
ENSDARG00000041137	dhrs13a.3	15:28073891-28152604	wt	Mo	OK	6.5871	12.2855	18.8726	0.899243	2.54328	5e-05	0.00153795	yes
ENSDARG00000020258	ewsr1a	10:8016884-8029717	wt	Mo	OK	77.1812	143.435	220.616	0.894079	2.64551	5e-05	0.00153795	yes
ENSDARG00000092660	cyp27c1	6:9332609-9346410	wt	Mo	OK	13.9054	25.82	39.7254	0.892844	3.08952	5e-05	0.00153795	yes
ENSDARG00000057598	s100b	22:13822358-13826520	wt	Mo	OK	3.60764	6.69416	10.3018	0.891846	2.11521	0.00035	0.0076251	yes
ENSDARG00000014804	cacna2d1a	4:19779503-19895170	wt	Mo	OK	0.596066	1.17999	1.77606	0.985227	2.03313	0.0011	0.018176	yes
ENSDARG00000018162	ctnnal1	19:35164566-35286446	wt	Mo	OK	9.21564	17.0976	26.3132	0.891641	2.93114	5e-05	0.00153795	yes
ENSDARG00000015010	ccdc114	11:40449577-40464235	wt	Mo	OK	0.44419	1.09519	1.53938	1.30194	2.08249	0.00085	0.0149401	yes
ENSDARG00000015033	slc23a1	21:30054721-30074439	wt	Mo	OK	1.95985	0.894845	2.85469	-1.13104	-1.73636	0.0014	0.0213775	yes
ENSDARG00000015076	cx44.1	1:46754799-46757618	wt	Mo	OK	2.49797	1.23258	3.73055	-1.01908	-2.21521	0.00035	0.0076251	yes
ENSDARG00000029724	pqbp1	8:36550293-36556956	wt	Mo	OK	7.71439	14.3084	22.0228	0.891242	2.30183	5e-05	0.00153795	yes
ENSDARG00000015134	camkk1b	15:15378106-15395479	wt	Mo	OK	0.460468	1.47262	1.93309	1.67722	2.74692	5e-05	0.00153795	yes
ENSDARG00000043554	mrpl40	8:2471521-2477283	wt	Mo	OK	7.7359	14.3149	22.0508	0.887874	2.24815	0.0001	0.00278989	yes
ENSDARG00000077326	slc45a4	16:30950354-30974606	wt	Mo	OK	7.85259	14.4215	22.2741	0.876977	2.3317	5e-05	0.00153795	yes
ENSDARG00000102705	otud6b	19:34249318-34263099	wt	Mo	OK	8.42717	15.4458	23.873	0.874091	2.3751	5e-05	0.00153795	yes
ENSDARG00000103038	pik3r3a	2:3085573-3146824	wt	Mo	OK	52.2496	95.7532	148.003	0.873902	2.66976	5e-05	0.00153795	yes
ENSDARG00000019815	fn1a	9:15391096-15453436	wt	Mo	OK	15.148	27.499	42.647	0.860247	2.82356	5e-05	0.00153795	yes
ENSDARG00000015654	ca15a	12:4283382-4309427	wt	Mo	OK	2.00608	0.633824	2.6399	-1.66223	-2.36556	0.0002	0.00492144	yes
ENSDARG00000090687	rcbtb2	15:3136842-3171822	wt	Mo	OK	4.03464	7.32199	11.3566	0.859798	2.49052	5e-05	0.00153795	yes
ENSDARG00000105277	cnksr3	20:4120324-4196333	wt	Mo	OK	16.8458	30.5418	47.3876	0.858391	2.00453	0.00045	0.00927217	yes
ENSDARG00000029075	pfkfb4b	6:39996068-40031887	wt	Mo	OK	29.5465	53.5459	83.0924	0.857788	2.55655	5e-05	0.00153795	yes
ENSDARG00000006640	eomesa	19:861016-875079	wt	Mo	OK	4.05289	7.34187	11.3948	0.857197	2.49182	5e-05	0.00153795	yes
ENSDARG00000058857	zgc:112052	18:13155578-13164433	wt	Mo	OK	10.4252	18.7837	29.2089	0.849409	2.74112	5e-05	0.00153795	yes
ENSDARG00000015879	pax8	5:71633657-71643280	wt	Mo	OK	5.3823	3.221	8.6033	-0.740713	-2.03166	0.0006	0.0117405	yes
ENSDARG00000078118	fam60al	7:64735845-64745304	wt	Mo	OK	19.5605	35.2177	54.7782	0.848355	2.91351	5e-05	0.00153795	yes
ENSDARG00000101534	rab3db	3:14362869-14387776	wt	Mo	OK	3.75069	6.73277	10.4835	0.844045	2.17883	0.00035	0.0076251	yes
ENSDARG00000103982	si:ch211-193l2.6	11:41401885-41406010	wt	Mo	OK	25.812	46.1058	71.9178	0.836905	2.56945	5e-05	0.00153795	yes
ENSDARG00000016141	slc6a2	7:35076998-35108709	wt	Mo	OK	0.648617	1.13382	1.78244	0.805751	1.88884	0.0015	0.0224044	yes
ENSDARG00000052893	rx3	21:10663525-10666595	wt	Mo	OK	10.3771	18.5041	28.8812	0.834439	2.52364	5e-05	0.00153795	yes
ENSDARG00000074667	akt1s1	3:30059576-30069715	wt	Mo	OK	37.3118	66.4477	103.76	0.832588	2.99319	5e-05	0.00153795	yes
ENSDARG00000040527	siae	18:36601806-36617685	wt	Mo	OK	6.52801	11.5831	18.1111	0.827305	2.5533	5e-05	0.00153795	yes
ENSDARG00000016364	gna15.1	22:21996957-22011329	wt	Mo	OK	4.24693	2.39074	6.63767	-0.828961	-2.21761	0.00025	0.00588102	yes
ENSDARG00000011493	dcun1d3	24:39630926-39647408	wt	Mo	OK	5.01325	8.88343	13.8967	0.825371	2.5586	5e-05	0.00153795	yes
ENSDARG00000103691	RFX7 (1 of many)	25:365152-382834	wt	Mo	OK	3.91976	6.92661	10.8464	0.821384	2.76558	5e-05	0.00153795	yes
ENSDARG00000016505	apbb1ip	24:6010699-6048893	wt	Mo	OK	1.92433	0.972169	2.8965	-0.985078	-2.19387	0.0001	0.00278989	yes
ENSDARG00000016536	npas2	5:22287885-22326924	wt	Mo	OK	1.22069	2.11192	3.33261	0.790866	1.77794	0.0024	0.0315002	yes
ENSDARG00000016545	CRAT (1 of many)	8:44932722-44982549	wt	Mo	OK	0.689508	1.77298	2.46249	1.36254	2.04239	0.0008	0.0143865	yes
ENSDARG00000016584	rgs7a	17:19606642-19707276	wt	Mo	OK	1.12452	0.466278	1.5908	-1.27005	-1.99171	0.00065	0.0123928	yes
ENSDARG00000062402	frem1b	22:17091449-17165314	wt	Mo	OK	12.0395	21.2524	33.2919	0.819843	2.97174	5e-05	0.00153795	yes
ENSDARG00000090182	zgc:110434	25:34639275-34639662	wt	Mo	OK	102.377	180.339	282.716	0.81682	2.46061	5e-05	0.00153795	yes
ENSDARG00000035066	ubtf	3:19892163-19914390	wt	Mo	OK	29.0751	51.0164	80.0915	0.811178	2.74122	5e-05	0.00153795	yes
ENSDARG00000016789	zgc:152891	21:31160599-31189350	wt	Mo	OK	0.380564	0.962768	1.34333	1.33905	2.04088	0.00115	0.0186952	yes
ENSDARG00000016793	crybb1l2	1:43720616-43745614	wt	Mo	OK	1.16818	0.316316	1.4845	-1.88482	-1.9224	0.002	0.0274731	yes
ENSDARG00000016835	tcirg1a	1:44170904-44199860	wt	Mo	OK	0.745313	1.74424	2.48955	1.22668	2.64654	0.0001	0.00278989	yes
ENSDARG00000022788	cops7a	16:21947669-21973293	wt	Mo	OK	11.5651	20.2412	31.8063	0.807519	2.38374	0.0001	0.00278989	yes
ENSDARG00000104825	trim35-7	3:5510484-5523471	wt	Mo	OK	8.49842	14.8684	23.3668	0.806987	2.42272	5e-05	0.00153795	yes
ENSDARG00000041115	cnfn	16:11899737-11908092	wt	Mo	OK	8.74775	15.2991	24.0468	0.80646	1.95577	0.0009	0.0156103	yes
ENSDARG00000017229	megf10	10:16111866-16204182	wt	Mo	OK	0.991297	0.313731	1.30503	-1.65979	-1.67901	0.0003	0.00678651	yes
ENSDARG00000101936	tmem106ba	15:34108759-34120735	wt	Mo	OK	7.23165	12.6065	19.8381	0.801774	2.44175	5e-05	0.00153795	yes
ENSDARG00000022509	cox4i2	23:19018044-19024805	wt	Mo	OK	4.40552	7.6757	12.0812	0.800985	1.84327	0.002	0.0274731	yes
ENSDARG00000017314	CELA1 (1 of many)	22:7409408-7446506	wt	Mo	OK	5.88234	2.51511	8.39745	-1.22577	-1.7891	0.0012	0.0191619	yes
ENSDARG00000097137	si:dkeyp-116a7.2	19:35781481-35782717	wt	Mo	OK	5.09361	8.85423	13.9478	0.797679	1.98631	0.0008	0.0143865	yes
ENSDARG00000056509	pdik1l	19:15581193-15613029	wt	Mo	OK	8.43932	14.6684	23.1077	0.797512	2.26453	5e-05	0.00153795	yes
ENSDARG00000068708	ifrd1	4:6791223-6800753	wt	Mo	OK	26.1669	45.421	71.5879	0.795618	2.10503	0.00075	0.0137623	yes
ENSDARG00000015901	ptbp2b	2:20118996-20137444	wt	Mo	OK	24.8306	43.0041	67.8347	0.792352	2.24372	5e-05	0.00153795	yes
ENSDARG00000051734	si:ch211-113a14.16	25:35787200-35787587	wt	Mo	OK	178.326	307.963	486.289	0.78824	2.62855	5e-05	0.00153795	yes
ENSDARG00000005651	hrasb	7:49365840-49381716	wt	Mo	OK	8.67724	14.9709	23.6481	0.786851	1.8046	0.0022	0.0295325	yes
ENSDARG00000017821	gata5	23:7445755-7457056	wt	Mo	OK	2.50476	0.925586	3.43035	-1.43623	-2.98899	5e-05	0.00153795	yes
ENSDARG00000102744	mgst3a	20:48757461-48773436	wt	Mo	OK	47.6437	82.1104	129.754	0.785281	2.5463	0.0001	0.00278989	yes
ENSDARG00000017880	kcnip3b	10:20697349-20748879	wt	Mo	OK	2.84036	5.58023	8.42059	0.974249	1.89272	0.0007	0.0130978	yes
ENSDARG00000017984	zgc:172106	1:54615772-54635013	wt	Mo	OK	2.06202	0.556471	2.61849	-1.88968	-1.6999	0.00025	0.00588102	yes
ENSDARG00000018004	nkx2.5	14:23943995-23946789	wt	Mo	OK	1.4488	0.256101	1.7049	-2.50007	-3.03808	0.00025	0.00588102	yes
ENSDARG00000098844	prkacbb	2:2514467-2541137	wt	Mo	OK	6.59634	11.3376	17.9339	0.781379	2.30861	5e-05	0.00153795	yes
ENSDARG00000042796	yy1a	17:30840044-30846289	wt	Mo	OK	50.3712	86.5579	136.929	0.781068	2.8087	5e-05	0.00153795	yes
ENSDARG00000012138	sgce	19:41451547-41482453	wt	Mo	OK	8.08967	13.899	21.9887	0.780824	2.14008	0.0004	0.00842463	yes
ENSDARG00000019098	cd82a	7:26438057-26466929	wt	Mo	OK	22.265	38.1634	60.4284	0.777412	2.57652	5e-05	0.00153795	yes
ENSDARG00000079248	mn1b	5:65997250-66023374	wt	Mo	OK	17.7717	30.4242	48.1959	0.775634	2.77672	5e-05	0.00153795	yes
ENSDARG00000004574	gtf3c2	20:38640434-38681282	wt	Mo	OK	12.365	21.0145	33.3795	0.765118	1.83652	0.00125	0.0197028	yes
ENSDARG00000018846	dgat2	10:32557415-32580360	wt	Mo	OK	4.83545	1.12204	5.95749	-2.10752	-4.73982	5e-05	0.00153795	yes
ENSDARG00000053097	hsf2	20:40578465-40590174	wt	Mo	OK	11.4764	19.4763	30.9527	0.76305	2.3141	5e-05	0.00153795	yes
ENSDARG00000104100	bmpr1ba	5:6996908-7206866	wt	Mo	OK	21.9221	37.0621	58.9842	0.757562	2.66145	5e-05	0.00153795	yes
ENSDARG00000043562	zgc:65997	17:23529092-23532044	wt	Mo	OK	5.8256	9.84454	15.6701	0.756918	2.00786	0.0008	0.0143865	yes
ENSDARG00000097737	si:dkey-188h10.3	3:55223548-55224870	wt	Mo	OK	9.44977	15.9114	25.3612	0.751714	1.88413	0.0014	0.0213775	yes
ENSDARG00000019265	ZBTB39	23:36538492-36547531	wt	Mo	OK	2.39412	3.72201	6.11613	0.636588	1.90021	0.00085	0.0149401	yes
ENSDARG00000102113	si:ch211-193l2.7	11:41449984-41453173	wt	Mo	OK	6.85966	11.5303	18.39	0.749215	1.67462	0.00375	0.0433328	yes
ENSDARG00000029818	srsf5a	13:36404397-36409296	wt	Mo	OK	140.934	236.599	377.533	0.747424	2.53345	5e-05	0.00153795	yes
ENSDARG00000101180	mcm7	14:40036-215580	wt	Mo	OK	132.021	221.62	353.641	0.747325	2.13009	0.0002	0.00492144	yes
ENSDARG00000062948	wasf3b	24:21395667-21433091	wt	Mo	OK	16.7535	28.1075	44.861	0.746488	2.5914	5e-05	0.00153795	yes
ENSDARG00000002549	eif3eb	19:23039944-23079965	wt	Mo	OK	7.57882	12.7136	20.2924	0.746325	1.78754	0.0025	0.0325133	yes
ENSDARG00000019564	asap2b	20:29731773-29772579	wt	Mo	OK	5.58026	3.3527	8.93296	-0.735009	-2.27841	5e-05	0.00153795	yes
ENSDARG00000019702	aldocb	21:39585911-39616539	wt	Mo	OK	3.0842	5.80711	8.89131	0.912925	2.42899	0.0002	0.00492144	yes
ENSDARG00000100697	si:ch73-52f24.4	16:51328511-51349886	wt	Mo	OK	30.1347	50.48	80.6147	0.744287	2.44284	5e-05	0.00153795	yes
ENSDARG00000103015	zgc:110434	7:6327808-6328408	wt	Mo	OK	367.112	614.117	981.229	0.742292	2.57	5e-05	0.00153795	yes
ENSDARG00000020494	znf330	1:52294446-52642922	wt	Mo	OK	17.1607	28.7009	45.8616	0.741991	1.96812	0.00055	0.0108993	yes
ENSDARG00000078929	abhd16a	16:10586630-10626068	wt	Mo	OK	11.3164	18.9018	30.2182	0.740106	2.44584	5e-05	0.00153795	yes
ENSDARG00000099093	dock1	12:43521977-43658321	wt	Mo	OK	19.4128	32.4045	51.8173	0.739184	2.38932	5e-05	0.00153795	yes
ENSDARG00000019877	rbks	17:41044519-41126491	wt	Mo	OK	4.35043	2.18756	6.53799	-0.991835	-2.0937	0.0009	0.0156103	yes
ENSDARG00000014474	yipf1	2:26943166-26948684	wt	Mo	OK	5.8837	9.7946	15.6783	0.735263	1.65478	0.0043	0.0477834	yes
ENSDARG00000019986	grhprb	1:19142865-19152602	wt	Mo	OK	2.92979	1.18283	4.11262	-1.30855	-1.70446	0.00075	0.0137623	yes
ENSDARG00000020028	cps1	9:39217327-39328048	wt	Mo	OK	1.24443	0.480674	1.7251	-1.37236	-2.91785	5e-05	0.00153795	yes
ENSDARG00000099184	map2k6	12:36415068-36464305	wt	Mo	OK	30.8663	51.1853	82.0516	0.729695	2.58453	5e-05	0.00153795	yes
ENSDARG00000020143	pah	4:17402703-17420557	wt	Mo	OK	1.89861	0.798116	2.69673	-1.25027	-2.47368	0.00015	0.00390457	yes
ENSDARG00000020224	ERGIC2 (1 of many)	12:30245676-30251718	wt	Mo	OK	6.36782	3.29586	9.66368	-0.950146	-2.37104	5e-05	0.00153795	yes
ENSDARG00000013478	rrp15	16:4367642-4373733	wt	Mo	OK	14.2119	23.5264	37.7383	0.727178	2.13171	0.0002	0.00492144	yes
ENSDARG00000018061	neil1	25:26383937-26389898	wt	Mo	OK	20.8224	34.4646	55.287	0.726979	2.1291	5e-05	0.00153795	yes
ENSDARG00000020326	tyk2	3:48527578-48599773	wt	Mo	OK	1.07924	0.340227	1.41947	-1.66545	-3.29649	5e-05	0.00153795	yes
ENSDARG00000069425	hsbp1a	7:26357890-26362868	wt	Mo	OK	27.1465	44.8264	71.9729	0.723583	2.16024	0.0001	0.00278989	yes
ENSDARG00000060411	ddx28	7:34692270-34694177	wt	Mo	OK	5.24987	8.66164	13.9115	0.722357	2.07396	0.00065	0.0123928	yes
ENSDARG00000067825	si:ch1073-459b3.2	18:5795047-5795804	wt	Mo	OK	12.9635	21.3799	34.3434	0.721802	1.89287	0.0012	0.0191619	yes
ENSDARG00000027088	ptgdsb.1	24:16877091-16884955	wt	Mo	OK	45.3232	74.6967	120.02	0.720793	2.34233	5e-05	0.00153795	yes
ENSDARG00000041294	noxo1a	3:61924549-61931972	wt	Mo	OK	3.94676	6.49268	10.4394	0.718144	2.02088	0.00065	0.0123928	yes
ENSDARG00000020602	grk7a	2:16867862-16875753	wt	Mo	OK	0.34212	0.810165	1.15229	1.24371	2.07106	0.00055	0.0108993	yes
ENSDARG00000020610	tnnt2a	23:5719251-5751200	wt	Mo	OK	3.58966	1.2653	4.85496	-1.50436	-2.33796	5e-05	0.00153795	yes
ENSDARG00000096100	si:dkey-254e13.13	4:59048769-59056394	wt	Mo	OK	21.6991	35.6776	57.3767	0.717383	2.07791	0.0002	0.00492144	yes
ENSDARG00000020718	SLC25A22 (1 of many)	25:4333511-4355991	wt	Mo	OK	1.54174	0.621173	2.16291	-1.31149	-1.92383	0.002	0.0274731	yes
ENSDARG00000020741	fga	1:9379389-9387428	wt	Mo	OK	5.83854	0.377299	6.21584	-3.95183	-2.45492	5e-05	0.00153795	yes
ENSDARG00000020749	caprin2	4:16626049-16639826	wt	Mo	OK	0.378731	1.30174	1.68047	1.7812	2.91969	5e-05	0.00153795	yes
ENSDARG00000020795	rac3b	12:2988148-3007296	wt	Mo	OK	4.13919	2.27698	6.41617	-0.862231	-2.49457	5e-05	0.00153795	yes
ENSDARG00000044924	gdf11	11:15478582-15622280	wt	Mo	OK	5.16917	8.49857	13.6677	0.717286	1.98537	0.00055	0.0108993	yes
ENSDARG00000020924	myo1ca	5:37184998-37216987	wt	Mo	OK	1.92805	0.802039	2.73009	-1.2654	-2.86714	5e-05	0.00153795	yes
ENSDARG00000089382	zgc:158463	5:825788-827000	wt	Mo	OK	24.286	39.9001	64.1861	0.716265	2.13828	0.0002	0.00492144	yes
ENSDARG00000020984	slc16a10	20:133487-158943	wt	Mo	OK	3.06327	5.32844	8.39171	0.798637	2.13135	0.0002	0.00492144	yes
ENSDARG00000021004	c5	5:62764793-62816203	wt	Mo	OK	4.35415	0.995284	5.34943	-2.12921	-5.70009	5e-05	0.00153795	yes
ENSDARG00000021154	PRODH2	12:3889402-3904003	wt	Mo	OK	1.83093	0.422583	2.25351	-2.11527	-3.84905	5e-05	0.00153795	yes
ENSDARG00000060338	trmt12	14:35074317-35082463	wt	Mo	OK	5.85229	9.59	15.4423	0.712528	1.94088	0.0014	0.0213775	yes
ENSDARG00000086411	srsf10b	17:53312994-53332747	wt	Mo	OK	25.2124	41.3147	66.5271	0.71252	1.94409	0.0006	0.0117405	yes
ENSDARG00000019332	ndufb4	24:23825881-23840744	wt	Mo	OK	21.406	35.0546	56.4606	0.711589	1.87388	0.0013	0.0202483	yes
ENSDARG00000021352	gria1a	14:33785540-33936260	wt	Mo	OK	1.53931	2.30318	3.84249	0.581339	1.72387	0.0028	0.0353922	yes
ENSDARG00000087508	si:ch211-39i22.1	9:56247361-56292510	wt	Mo	OK	3.92016	6.41819	10.3384	0.711255	2.1352	0.00015	0.00390457	yes
ENSDARG00000077906	rnf165a	21:4809690-4842598	wt	Mo	OK	20.3432	33.2936	53.6368	0.710697	1.76833	0.0016	0.0233674	yes
ENSDARG00000095019	lmo2	18:38307868-38315657	wt	Mo	OK	14.9323	24.3146	39.2469	0.703387	2.34383	5e-05	0.00153795	yes
ENSDARG00000021924	hsp70.3	3:25950471-26026195	wt	Mo	OK	2.96352	0.442802	3.40632	-2.74257	-3.82917	5e-05	0.00153795	yes
ENSDARG00000022000	traf3	17:29210538-29232295	wt	Mo	OK	1.96046	3.43407	5.39453	0.808727	2.00342	0.0006	0.0117405	yes
ENSDARG00000077080	gprc5ba	3:62130672-62143516	wt	Mo	OK	4.45055	7.23696	11.6875	0.701399	1.93723	0.0008	0.0143865	yes
ENSDARG00000090690	nell2a	25:558242-668986	wt	Mo	OK	3.87867	6.30604	10.1847	0.701173	2.00127	0.00095	0.0162469	yes
ENSDARG00000059398	myef2	18:5552072-5567123	wt	Mo	OK	83.2699	135.35	218.62	0.700824	1.7956	0.00265	0.033897	yes
ENSDARG00000018643	igf2a	7:48597719-48603704	wt	Mo	OK	7.83399	12.73	20.564	0.70042	2.03958	0.00055	0.0108993	yes
ENSDARG00000036005	pitpnb	10:4046071-4086400	wt	Mo	OK	10.3999	16.8923	27.2922	0.699797	2.30545	5e-05	0.00153795	yes
ENSDARG00000023111	plg	20:42791377-42805774	wt	Mo	OK	3.34181	0.855314	4.19712	-1.9661	-2.27978	0.00015	0.00390457	yes
ENSDARG00000099164	NACC1 (1 of many)	3:33613371-33627128	wt	Mo	OK	7.86009	12.7559	20.616	0.698545	2.46231	5e-05	0.00153795	yes
ENSDARG00000019364	mbip	17:38348261-38360794	wt	Mo	OK	6.14279	9.94567	16.0885	0.695174	1.69127	0.00445	0.0490676	yes
ENSDARG00000023713	aqp1a.1	2:2895632-2907365	wt	Mo	OK	3.05957	1.19425	4.25382	-1.35723	-2.46644	0.0002	0.00492144	yes
ENSDARG00000023868	AKAP13 (1 of many)	7:14838905-15008833	wt	Mo	OK	1.29577	2.18699	3.48276	0.755139	1.39137	0.00345	0.0409451	yes
ENSDARG00000024101	adra1d	1:41256045-41281418	wt	Mo	OK	1.09129	0.560011	1.6513	-0.962504	-2.18668	0.0003	0.00678651	yes
ENSDARG00000024160	hao1	17:3879455-3912544	wt	Mo	OK	4.90269	1.22969	6.13238	-1.99528	-3.82966	5e-05	0.00153795	yes
ENSDARG00000024195	znf395b	20:34834858-34851738	wt	Mo	OK	0.97167	2.93998	3.91165	1.59727	2.42509	0.00015	0.00390457	yes
ENSDARG00000099635	akap8l	1:58441189-58530322	wt	Mo	OK	79.7261	129.035	208.761	0.694635	1.65305	0.00375	0.0433328	yes
ENSDARG00000024548	cryba4	10:44195429-44204668	wt	Mo	OK	3.14819	0.991274	4.13946	-1.66717	-2.17994	0.0018	0.025441	yes
ENSDARG00000079071	jam2b	9:35187059-35201211	wt	Mo	OK	7.91004	12.7964	20.7064	0.693986	1.80609	0.0015	0.0224044	yes
ENSDARG00000098875	Metazoa_SRP	11:12203684-12203981	wt	Mo	OK	17732.9	28624.7	46357.6	0.690829	2.14171	5e-05	0.00153795	yes
ENSDARG00000102403	cry2	25:13750482-13774721	wt	Mo	OK	8.96781	14.4683	23.4361	0.690069	2.02523	0.00055	0.0108993	yes
ENSDARG00000004167	zgc:110366	2:7260674-7276843	wt	Mo	OK	8.6784	13.9961	22.6745	0.689521	1.88419	0.0011	0.018176	yes
ENSDARG00000079730	FUZ	2:3682308-3688726	wt	Mo	OK	4.45661	7.18604	11.6426	0.68925	1.82397	0.0016	0.0233674	yes
ENSDARG00000025386	lsm14b	23:540602-554390	wt	Mo	OK	0.291847	0.932483	1.22433	1.67586	2.10153	0.00205	0.0279355	yes
ENSDARG00000078442	NOP9	2:58418609-58446084	wt	Mo	OK	5.30219	8.54739	13.8496	0.688896	1.96731	0.00075	0.0137623	yes
ENSDARG00000020623	baxa	3:37634630-37644015	wt	Mo	OK	14.4142	23.2092	37.6234	0.687207	2.24716	0.0001	0.00278989	yes
ENSDARG00000045695	myca	24:10273097-10275662	wt	Mo	OK	15.5908	25.0981	40.6889	0.686887	2.2817	0.00015	0.00390457	yes
ENSDARG00000099139	fbxw5	5:53811287-53835099	wt	Mo	OK	9.64582	15.5264	25.1722	0.686747	2.39394	5e-05	0.00153795	yes
ENSDARG00000026052	ccdc3a	4:7993244-8005834	wt	Mo	OK	0.363575	1.23052	1.5941	1.75894	2.27308	0.00125	0.0197028	yes
ENSDARG00000026086	zgc:162324	6:46256937-46318645	wt	Mo	OK	6.30522	1.63466	7.93988	-1.94755	-3.75225	5e-05	0.00153795	yes
ENSDARG00000026149	slc46a1	15:28242761-28253653	wt	Mo	OK	1.65105	3.65512	5.30617	1.14654	2.61829	5e-05	0.00153795	yes
ENSDARG00000101118	CABZ01066813.1	20:53350930-53372331	wt	Mo	OK	11.3573	18.2477	29.605	0.684094	2.24319	5e-05	0.00153795	yes
ENSDARG00000103542	vegfaa	16:4458252-4488590	wt	Mo	OK	7.71468	12.3947	20.1094	0.684039	2.11849	0.00015	0.00390457	yes
ENSDARG00000095906	si:dkey-235h8.1	16:29277797-29292379	wt	Mo	OK	13.7252	22.0374	35.7626	0.683125	2.33224	5e-05	0.00153795	yes
ENSDARG00000009653	lhfpl2a	21:284298-308867	wt	Mo	OK	9.27814	14.8971	24.1752	0.683122	1.82925	0.00145	0.0219063	yes
ENSDARG00000026799	suv39h1a	8:23374229-23383866	wt	Mo	OK	3.56771	1.76311	5.33082	-1.01688	-2.13505	0.00055	0.0108993	yes
ENSDARG00000026820	gc3	5:37523479-37560880	wt	Mo	OK	0.363802	1.31676	1.68056	1.85577	3.42662	5e-05	0.00153795	yes
ENSDARG00000002467	rdh14b	20:9433708-9440282	wt	Mo	OK	8.87316	14.2342	23.1074	0.681841	2.107	0.0002	0.00492144	yes
ENSDARG00000026834	cdr2l	3:59659894-59690351	wt	Mo	OK	1.84583	3.01488	4.86071	0.707836	1.63464	0.0043	0.0477834	yes
ENSDARG00000026907	slc48a1a	23:33430631-33434894	wt	Mo	OK	1.38251	3.32472	4.70723	1.26595	2.54083	0.00015	0.00390457	yes
ENSDARG00000026990	klhl6	2:36663884-36677660	wt	Mo	OK	0.781415	0.239493	1.02091	-1.70611	-1.80737	0.0004	0.00842463	yes
ENSDARG00000027063	arpc1b	3:40667152-40678754	wt	Mo	OK	3.85982	1.62012	5.47994	-1.25243	-2.73769	5e-05	0.00153795	yes
ENSDARG00000040251	ctsk	16:29558313-29567926	wt	Mo	OK	4.59141	7.36047	11.9519	0.680862	1.81308	0.00215	0.0289979	yes
ENSDARG00000094965	nfil3-5	6:7742071-7963434	wt	Mo	OK	7.31417	11.7235	19.0377	0.680638	1.72643	0.00455	0.0498808	yes
ENSDARG00000063416	ptprk	20:1420721-1540060	wt	Mo	OK	6.6806	10.7063	17.3869	0.680411	1.75052	0.0026	0.0335333	yes
ENSDARG00000079252	fam117ab	12:9811632-9838233	wt	Mo	OK	4.14838	6.64671	10.7951	0.680091	1.89663	0.0011	0.018176	yes
ENSDARG00000053868	etv2	16:42058780-42063826	wt	Mo	OK	25.6152	41.0107	66.6259	0.678997	2.32194	5e-05	0.00153795	yes
ENSDARG00000027687	tmem230a	10:19059711-19064142	wt	Mo	OK	4.55383	2.55292	7.10675	-0.834931	-1.99005	0.00055	0.0108993	yes
ENSDARG00000078359	endouc	18:15490812-15498934	wt	Mo	OK	14.5742	23.3104	37.8846	0.677553	2.19194	0.0004	0.00842463	yes
ENSDARG00000078954	rxrba	19:7323191-7355919	wt	Mo	OK	53.6796	85.8181	139.498	0.676909	1.94238	0.0007	0.0130978	yes
ENSDARG00000101481	rbp5	16:31755125-31763217	wt	Mo	OK	10.0255	16.0204	26.0459	0.676239	1.91304	0.00095	0.0162469	yes
ENSDARG00000091900	si:ch73-54n14.2	13:10362444-10488200	wt	Mo	OK	12.4888	19.9404	32.4292	0.675057	1.68288	0.0041	0.0462521	yes
ENSDARG00000028213	ttn.2	9:42931204-43272173	wt	Mo	OK	3.3756	0.991108	4.36671	-1.76803	-2.05389	5e-05	0.00153795	yes
ENSDARG00000028348	pax3b	15:42206822-42250798	wt	Mo	OK	4.2427	1.89277	6.13547	-1.16448	-2.71251	5e-05	0.00153795	yes
ENSDARG00000028386	htatip2	7:16844307-16851210	wt	Mo	OK	6.6193	3.12334	9.74264	-1.08359	-2.1988	0.00015	0.00390457	yes
ENSDARG00000070677	fezf2	11:19618374-19909486	wt	Mo	OK	13.9794	22.3188	36.2982	0.67496	1.85691	0.0015	0.0224044	yes
ENSDARG00000040644	pxylp1	15:41858306-41888313	wt	Mo	OK	3.86538	6.17126	10.0366	0.674953	1.73983	0.00245	0.0320091	yes
ENSDARG00000028784	si:dkey-24p1.6	15:38406835-38460216	wt	Mo	OK	0.383775	1.31454	1.69832	1.77622	2.52049	0.0001	0.00278989	yes
ENSDARG00000058011	arxa	24:23791654-23797548	wt	Mo	OK	9.70009	15.4635	25.1636	0.672796	2.04924	0.00035	0.0076251	yes
ENSDARG00000100742	reep5	10:6494975-6516856	wt	Mo	OK	12.3519	19.6513	32.0032	0.669895	1.88034	0.0012	0.0191619	yes
ENSDARG00000061759	kdm6a	9:33978905-34053238	wt	Mo	OK	11.8414	18.8311	30.6725	0.669279	1.76485	0.00325	0.0391971	yes
ENSDARG00000070913	sox2	22:37412521-37591549	wt	Mo	OK	25.0771	39.7862	64.8633	0.665899	2.28823	5e-05	0.00153795	yes
ENSDARG00000101584	si:ch211-132d3.4	7:14108458-14135906	wt	Mo	OK	83.1877	131.815	215.003	0.664068	2.40203	5e-05	0.00153795	yes
ENSDARG00000013351	cirbpb	22:18517031-18521296	wt	Mo	OK	461.177	730.549	1191.73	0.663661	1.89129	0.00165	0.0238532	yes
ENSDARG00000029204	tyrp1a	7:73941373-73947349	wt	Mo	OK	2.23845	1.20476	3.44321	-0.893757	-1.89163	0.0014	0.0213775	yes
ENSDARG00000045027	rab9a	9:55097172-55115376	wt	Mo	OK	10.7683	17.0285	27.7968	0.66117	1.84455	0.00185	0.0258486	yes
ENSDARG00000029372	rasa4	5:58608686-58718291	wt	Mo	OK	2.04891	0.707118	2.75603	-1.53483	-3.17999	5e-05	0.00153795	yes
ENSDARG00000029432	tph1a	25:8015127-8035938	wt	Mo	OK	3.19378	1.23507	4.42885	-1.37067	-2.88823	5e-05	0.00153795	yes
ENSDARG00000029439	atp2a2a	8:11649526-11707308	wt	Mo	OK	5.98217	3.7876	9.76977	-0.659384	-1.69709	0.00315	0.0382609	yes
ENSDARG00000004757	ybx1	8:47108566-47161620	wt	Mo	OK	130.268	205.994	336.262	0.661123	2.18615	0.0001	0.00278989	yes
ENSDARG00000102221	HACD4	7:18741560-18751237	wt	Mo	OK	14.0023	22.1318	36.1341	0.660459	1.93369	0.0009	0.0156103	yes
ENSDARG00000029881	kcnh2a	2:24420361-24513019	wt	Mo	OK	0.912313	0.490234	1.40255	-0.896059	-1.7737	0.00265	0.033897	yes
ENSDARG00000029894	slc2a15a	13:28286846-28311636	wt	Mo	OK	1.72367	0.479718	2.20339	-1.84522	-2.90892	5e-05	0.00153795	yes
ENSDARG00000076966	pagr1	12:3686885-3695213	wt	Mo	OK	14.9692	23.6511	38.6203	0.659905	2.01038	0.0004	0.00842463	yes
ENSDARG00000030357	zgc:66313	17:43749942-43773770	wt	Mo	OK	2.13138	6.25729	8.38867	1.55375	2.40059	5e-05	0.00153795	yes
ENSDARG00000004460	desi2	13:11417978-11438093	wt	Mo	OK	6.19893	9.77684	15.9758	0.65735	1.84412	0.0011	0.018176	yes
ENSDARG00000009922	dmbx1a	2:10387509-10394667	wt	Mo	OK	10.0478	15.8383	25.8861	0.65654	2.16794	5e-05	0.00153795	yes
ENSDARG00000031222	lhx2b	8:3026370-3042643	wt	Mo	OK	18.038	28.3904	46.4284	0.654362	2.25574	5e-05	0.00153795	yes
ENSDARG00000030722	xirp1	2:24093962-24113167	wt	Mo	OK	3.04896	1.05463	4.10359	-1.53159	-4.35301	5e-05	0.00153795	yes
ENSDARG00000030967	si:ch211-51a6.2	13:21649328-21691481	wt	Mo	OK	0.866877	0.384291	1.25117	-1.17363	-1.68845	0.0031	0.0379229	yes
ENSDARG00000058479	zgc:110425	7:6333315-6334614	wt	Mo	OK	20.3008	31.9225	52.2233	0.65304	2.07185	0.00025	0.00588102	yes
ENSDARG00000027199	smad1	1:35165016-35196915	wt	Mo	OK	11.9267	18.7186	30.6453	0.650284	2.2091	0.0001	0.00278989	yes
ENSDARG00000086896	fubp3	5:853580-881489	wt	Mo	OK	21.9623	34.4602	56.4225	0.649901	2.15067	0.0001	0.00278989	yes
ENSDARG00000043848	sod1	10:25732681-25737741	wt	Mo	OK	22.3298	35.0244	57.3542	0.649393	1.96376	0.0011	0.018176	yes
ENSDARG00000031325	tmed1a	3:50413837-50425171	wt	Mo	OK	5.00251	1.49027	6.49278	-1.74708	-3.56443	5e-05	0.00153795	yes
ENSDARG00000031336	hsd20b2	5:37600653-37614654	wt	Mo	OK	5.92099	2.00656	7.92755	-1.56111	-4.07598	5e-05	0.00153795	yes
ENSDARG00000031600	rd3	20:14073433-14101855	wt	Mo	OK	1.42848	2.81124	4.23972	0.97672	1.91015	0.00175	0.0249821	yes
ENSDARG00000031891	tbx1	5:14686605-14715567	wt	Mo	OK	1.407	0.622853	2.02985	-1.17565	-2.01429	0.0006	0.0117405	yes
ENSDARG00000031929	stard14	14:32930072-32937770	wt	Mo	OK	2.60914	5.69767	8.30681	1.1268	2.8422	5e-05	0.00153795	yes
ENSDARG00000031976	nos2b	15:30442749-30468128	wt	Mo	OK	5.94582	3.67801	9.62383	-0.692949	-2.07174	0.00035	0.0076251	yes
ENSDARG00000007531	zcchc9	10:43070528-43075771	wt	Mo	OK	9.23016	14.4753	23.7055	0.649161	1.88061	0.00115	0.0186952	yes
ENSDARG00000094441	si:dkey-161j23.5	24:39649705-39715554	wt	Mo	OK	3.93675	6.1714	10.1082	0.648593	1.64695	0.0013	0.0202483	yes
ENSDARG00000010270	fezf1	25:27829705-27832889	wt	Mo	OK	14.1663	22.2064	36.3727	0.648514	2.18316	5e-05	0.00153795	yes
ENSDARG00000032584	thnsl2	5:71309873-71320710	wt	Mo	OK	0.598793	1.31584	1.91463	1.13585	1.91876	0.00185	0.0258486	yes
ENSDARG00000004932	anos1b	22:38837165-38927144	wt	Mo	OK	5.83716	9.1465	14.9837	0.647953	1.90676	0.00075	0.0137623	yes
ENSDARG00000032639	cd36	4:22937496-22950494	wt	Mo	OK	1.00605	0.236766	1.24282	-2.08717	-2.61976	0.0007	0.0130978	yes
ENSDARG00000032862	ugt5g1	7:22417623-22425830	wt	Mo	OK	1.8685	0.889323	2.75782	-1.0711	-2.17292	0.00015	0.00390457	yes
ENSDARG00000032919	chchd3a	4:15491463-15604794	wt	Mo	OK	4.3834	2.26397	6.64737	-0.953198	-1.68844	0.00405	0.0458696	yes
ENSDARG00000032929	cryba1l1	14:47316813-47333038	wt	Mo	OK	4.03978	1.67019	5.70997	-1.27427	-1.75108	0.0014	0.0213775	yes
ENSDARG00000032976	cmlc1	5:63486420-63487216	wt	Mo	OK	3.84785	1.03226	4.88011	-1.89825	-2.67434	0.00015	0.00390457	yes
ENSDARG00000029248	fubp1	2:8851287-8865099	wt	Mo	OK	98.9655	154.927	253.892	0.646587	2.28521	5e-05	0.00153795	yes
ENSDARG00000033161	sst1.2	15:36257985-36262308	wt	Mo	OK	2.02502	3.82169	5.84671	0.916272	1.71417	0.0044	0.0486418	yes
ENSDARG00000030448	sppl2	2:37498211-37520552	wt	Mo	OK	8.21018	12.8295	21.0397	0.643981	2.12667	0.0003	0.00678651	yes
ENSDARG00000033320	sar1ab	13:30014486-30020142	wt	Mo	OK	6.05668	3.43355	9.49023	-0.818827	-1.74437	0.00295	0.036745	yes
ENSDARG00000001910	rorab	7:29241522-29354595	wt	Mo	OK	16.0372	25.0445	41.0817	0.64307	2.29182	0.00015	0.00390457	yes
ENSDARG00000011870	sp8a	19:2483467-2486646	wt	Mo	OK	10.7602	16.7867	27.5469	0.64161	2.12804	0.00025	0.00588102	yes
ENSDARG00000033508	CR396586.1	10:16230686-16236268	wt	Mo	OK	0.777711	0.229952	1.00766	-1.7579	-2.42991	0.0009	0.0156103	yes
ENSDARG00000033735	ncf1	5:60747819-60760976	wt	Mo	OK	1.31989	0.603405	1.92329	-1.12922	-1.98519	0.00145	0.0219063	yes
ENSDARG00000033760	pmelb	23:35573738-35591533	wt	Mo	OK	2.761	1.22822	3.98922	-1.16862	-2.13277	0.0005	0.0100956	yes
ENSDARG00000104782	oaz1b	21:698906-710496	wt	Mo	OK	37.7492	58.8457	96.5949	0.640489	2.18538	0.0001	0.00278989	yes
ENSDARG00000033802	cyp27a7	9:38599195-38609345	wt	Mo	OK	1.52785	0.612129	2.13998	-1.31959	-2.17435	0.0003	0.00678651	yes
ENSDARG00000015824	lemd3	4:12917378-12931237	wt	Mo	OK	9.09514	14.178	23.2731	0.640487	2.10379	0.0001	0.00278989	yes
ENSDARG00000056979	lhx9	22:23228024-23238701	wt	Mo	OK	10.0854	15.7133	25.7987	0.639721	1.98242	0.00065	0.0123928	yes
ENSDARG00000099449	atrxl	5:22541101-22604001	wt	Mo	OK	6.88517	10.716	17.6012	0.638198	2.19984	0.0001	0.00278989	yes
ENSDARG00000034063	CABZ01068208.1	17:53294819-53301747	wt	Mo	OK	1.82283	0.840542	2.66337	-1.11679	-2.06257	0.0007	0.0130978	yes
ENSDARG00000034173	prkcq	4:25402042-25454181	wt	Mo	OK	0.492498	1.33388	1.82638	1.43745	2.9055	5e-05	0.00153795	yes
ENSDARG00000034222	hs1bp3	17:48911634-48925571	wt	Mo	OK	2.46434	0.975015	3.43935	-1.33771	-2.22472	0.0001	0.00278989	yes
ENSDARG00000102587	mios	16:47345187-47366438	wt	Mo	OK	20.8769	32.4849	53.3618	0.63786	2.22565	0.00015	0.00390457	yes
ENSDARG00000034273	sid4	1:57971017-57981003	wt	Mo	OK	2.47116	1.07771	3.54887	-1.19722	-2.34359	0.0004	0.00842463	yes
ENSDARG00000034443	mpped2	25:14598475-14642658	wt	Mo	OK	2.56792	4.28594	6.85386	0.739015	1.877	0.0017	0.024452	yes
ENSDARG00000074050	efnb2b	1:6948685-6976437	wt	Mo	OK	11.3838	17.7049	29.0887	0.637164	1.78381	0.00165	0.0238532	yes
ENSDARG00000042329	BCR (1 of many)	8:30491493-30586642	wt	Mo	OK	6.73836	10.4623	17.2007	0.634732	2.14082	0.00035	0.0076251	yes
ENSDARG00000026519	ralgps2	20:16033444-16256836	wt	Mo	OK	10.5449	16.3695	26.9144	0.634471	1.84608	0.00105	0.0175705	yes
ENSDARG00000034852	nt5c2l1	10:17502923-17585588	wt	Mo	OK	5.84385	3.19569	9.03954	-0.870791	-1.93803	0.00095	0.0162469	yes
ENSDARG00000005645	robo3	10:31414254-31619799	wt	Mo	OK	7.61576	11.8219	19.4377	0.634407	2.16717	0.0002	0.00492144	yes
ENSDARG00000061265	lmln	9:38692750-38707129	wt	Mo	OK	4.51906	6.97183	11.4909	0.625516	1.80121	0.00235	0.0310825	yes
ENSDARG00000104848	cdkal1	16:1363-15105	wt	Mo	OK	11.4717	17.6964	29.1681	0.625369	1.80123	0.00215	0.0289979	yes
ENSDARG00000035169	layna	5:57215831-57227791	wt	Mo	OK	0.475515	1.92899	2.4045	2.02029	2.50745	0.00105	0.0175705	yes
ENSDARG00000008131	sox1b	1:45503100-45504875	wt	Mo	OK	31.9276	49.2474	81.175	0.625243	2.20083	0.00015	0.00390457	yes
ENSDARG00000035095	tdgf1	10:1927729-1934212	wt	Mo	OK	5.22869	8.06316	13.2919	0.624897	1.65724	0.00305	0.03758	yes
ENSDARG00000035544	etnppl	7:59773895-59785278	wt	Mo	OK	1.58418	0.180915	1.76509	-3.13036	-3.61561	5e-05	0.00153795	yes
ENSDARG00000012674	rpusd4	11:17830053-17860142	wt	Mo	OK	8.99038	13.8618	22.8522	0.624664	1.88057	0.0014	0.0213775	yes
ENSDARG00000103783	cyyr1	1:665124-674564	wt	Mo	OK	12.2277	18.852	31.0797	0.624556	1.79093	0.00205	0.0279355	yes
ENSDARG00000042837	atp1b3b	15:4362013-4424770	wt	Mo	OK	5.65398	8.71128	14.3653	0.62362	1.78955	0.00285	0.0357599	yes
ENSDARG00000089042	foxb1a	25:33668743-33670725	wt	Mo	OK	4.28443	6.59724	10.8817	0.622757	1.69269	0.0044	0.0486418	yes
ENSDARG00000026759	ldlrb	6:84454-91590	wt	Mo	OK	5.46205	8.40041	13.8625	0.621017	1.68469	0.0031	0.0379229	yes
ENSDARG00000011240	ift46	10:29849559-29858607	wt	Mo	OK	14.1211	21.6998	35.8209	0.619828	1.9983	0.0006	0.0117405	yes
ENSDARG00000035682	LTBP3	5:36917523-36985323	wt	Mo	OK	0.503211	0.896748	1.39996	0.833538	1.8176	0.0022	0.0295325	yes
ENSDARG00000007867	dazap2	23:33792070-33803021	wt	Mo	OK	10.4784	16.0945	26.5729	0.619156	2.02517	0.0004	0.00842463	yes
ENSDARG00000037116	cxcl12a	13:30673916-30689265	wt	Mo	OK	7.622	11.7031	19.3251	0.618649	2.01329	0.00075	0.0137623	yes
ENSDARG00000058873	ptpdc1b	23:4434434-4470767	wt	Mo	OK	10.5223	16.1543	26.6766	0.618464	1.85355	0.0013	0.0202483	yes
ENSDARG00000058323	tmbim1	6:12761179-12787308	wt	Mo	OK	5.57489	8.5585	14.1334	0.618414	1.699	0.0033	0.0396324	yes
ENSDARG00000007791	ppp2r1a	5:57103004-57127879	wt	Mo	OK	60.6644	93.1235	153.788	0.618294	2.19749	0.00045	0.00927217	yes
ENSDARG00000098270	znf1053	4:42005579-42013350	wt	Mo	OK	6.21031	9.53148	15.7418	0.618036	1.74475	0.0032	0.0387033	yes
ENSDARG00000035904	crabp1b	7:48047139-48069974	wt	Mo	OK	3.75703	1.08553	4.84256	-1.7912	-2.83118	0.00015	0.00390457	yes
ENSDARG00000035985	fam210aa	19:12710885-12728880	wt	Mo	OK	1.96028	3.38802	5.3483	0.789382	1.94461	0.0004	0.00842463	yes
ENSDARG00000029045	peli2	17:43916926-43966968	wt	Mo	OK	10.5115	16.0922	26.6037	0.614393	2.02563	0.00035	0.0076251	yes
ENSDARG00000099960	elovl1a	2:19503307-19566048	wt	Mo	OK	10.5114	16.0744	26.5858	0.612801	1.90381	0.00085	0.0149401	yes
ENSDARG00000036096	smad3a	7:33831510-33878113	wt	Mo	OK	2.88037	4.18938	7.06975	0.540485	1.72068	0.00235	0.0310825	yes
ENSDARG00000059553	sympk	5:61199461-61227832	wt	Mo	OK	20.4776	31.2587	51.7363	0.610206	2.20711	0.00015	0.00390457	yes
ENSDARG00000068814	spata2l	18:14715602-14719926	wt	Mo	OK	4.24676	6.48218	10.7289	0.610117	1.72814	0.0029	0.0362013	yes
ENSDARG00000036189	spata4	14:36053539-36057562	wt	Mo	OK	2.68947	5.56611	8.25558	1.04935	2.16451	0.00035	0.0076251	yes
ENSDARG00000101407	tgm1l4	23:46240646-46250912	wt	Mo	OK	24.8231	37.8861	62.7092	0.609985	2.12068	0.00035	0.0076251	yes
ENSDARG00000018743	scamp5a	25:31426266-31452413	wt	Mo	OK	7.75084	11.8155	19.5663	0.608256	1.70967	0.0025	0.0325133	yes
ENSDARG00000036272	gcgrb	1:55675354-55693812	wt	Mo	OK	1.91235	0.555729	2.46808	-1.7829	-2.99078	5e-05	0.00153795	yes
ENSDARG00000074453	zfx	24:16861227-16877034	wt	Mo	OK	17.49	26.6189	44.1089	0.605922	1.84175	0.00015	0.00390457	yes
ENSDARG00000036371	acta1a	1:53286190-53293789	wt	Mo	OK	5.90278	1.10681	7.00959	-2.41499	-4.51465	5e-05	0.00153795	yes
ENSDARG00000036571	sema3e	18:9524529-9607588	wt	Mo	OK	1.04698	0.55078	1.59776	-0.92668	-1.77004	0.00395	0.0450053	yes
ENSDARG00000031138	irx3b	25:35901115-36106032	wt	Mo	OK	15.3346	23.3192	38.6538	0.604734	1.84898	0.0014	0.0213775	yes
ENSDARG00000036776	aldh8a1	23:31826072-31837222	wt	Mo	OK	3.44944	1.1177	4.56714	-1.62583	-3.24867	5e-05	0.00153795	yes
ENSDARG00000036793	ttll5	17:51851746-51983272	wt	Mo	OK	4.08826	2.65351	6.74177	-0.623587	-1.78518	0.00155	0.0227929	yes
ENSDARG00000036816	pou2f2a	19:6294648-6384068	wt	Mo	OK	2.49883	4.10741	6.60624	0.716974	2.03708	5e-05	0.00153795	yes
ENSDARG00000052713	lrrtm1	1:41523895-42334565	wt	Mo	OK	9.88677	15.0322	24.919	0.604487	1.74267	0.00265	0.033897	yes
ENSDARG00000035161	pkdcca	13:2975429-3022092	wt	Mo	OK	8.53703	12.971	21.508	0.603488	1.84148	0.00085	0.0149401	yes
ENSDARG00000023495	ift74	5:446757-472748	wt	Mo	OK	9.06073	13.7662	22.8269	0.603427	1.89509	0.0008	0.0143865	yes
ENSDARG00000036863	MYO1D	12:28262842-28422713	wt	Mo	OK	3.44921	4.94633	8.39554	0.520092	1.70986	0.00325	0.0391971	yes
ENSDARG00000079611	sema4c	5:14028883-14148068	wt	Mo	OK	12.1902	18.5017	30.6919	0.601933	2.0656	0.0004	0.00842463	yes
ENSDARG00000036966	hsd3b7	3:32612231-32646536	wt	Mo	OK	1.67754	0.601235	2.27877	-1.48035	-2.16061	0.00025	0.00588102	yes
ENSDARG00000012519	hcfc1b	8:7488095-7549084	wt	Mo	OK	10.1766	15.4394	25.616	0.601359	1.69944	0.0008	0.0143865	yes
ENSDARG00000037030	casz1	23:29029708-29138989	wt	Mo	OK	1.31372	0.661522	1.97524	-0.989798	-2.53991	5e-05	0.00153795	yes
ENSDARG00000004311	ldlrap1a	19:29750547-29776559	wt	Mo	OK	5.97971	9.06614	15.0459	0.600414	1.66692	0.0041	0.0462521	yes
ENSDARG00000070832	snrka	16:8135108-8219070	wt	Mo	OK	6.6055	10.0095	16.615	0.59963	2.05568	0.00035	0.0076251	yes
ENSDARG00000037196	ARID5B	12:8134179-8347970	wt	Mo	OK	3.45089	5.06351	8.5144	0.55317	1.73622	0.00225	0.0300621	yes
ENSDARG00000037244	gpr137	14:26141121-26152596	wt	Mo	OK	2.7341	1.59852	4.33262	-0.774333	-1.68418	0.0042	0.0471006	yes
ENSDARG00000091563	snw1	20:5336407-5355538	wt	Mo	OK	31.0716	47.0538	78.1254	0.598718	2.12816	0.00015	0.00390457	yes
ENSDARG00000037281	fgg	1:24978969-24988554	wt	Mo	OK	7.44075	1.38027	8.82102	-2.4305	-4.15369	5e-05	0.00153795	yes
ENSDARG00000104222	inppl1a	15:46988350-47014875	wt	Mo	OK	20.1505	30.5121	50.6626	0.598566	2.05902	0.00025	0.00588102	yes
ENSDARG00000037403	HSPA8 (1 of many)	15:19725765-19741779	wt	Mo	OK	2.14347	0.896498	3.03997	-1.25758	-1.89912	0.00055	0.0108993	yes
ENSDARG00000037532	mcm3l	20:6503700-6542515	wt	Mo	OK	0.376373	0.837751	1.21412	1.15436	1.86278	0.0036	0.0421982	yes
ENSDARG00000037555	atoh8	14:9201276-9216350	wt	Mo	OK	3.1525	1.69709	4.84959	-0.89343	-2.05994	0.00065	0.0123928	yes
ENSDARG00000099084	pcif1	6:55318065-55344191	wt	Mo	OK	8.67826	13.1404	21.8187	0.598532	1.89383	0.0012	0.0191619	yes
ENSDARG00000037679	MPC2 (1 of many)	1:9999731-10012492	wt	Mo	OK	4.94133	2.33016	7.27149	-1.08447	-1.88271	0.0013	0.0202483	yes
ENSDARG00000060113	znf395a	17:16082226-16100451	wt	Mo	OK	14.9249	22.5961	37.521	0.598352	1.8622	0.0003	0.00678651	yes
ENSDARG00000044511	etv5b	6:13902581-13910699	wt	Mo	OK	24.2665	36.6581	60.9246	0.595164	2.13171	0.00015	0.00390457	yes
ENSDARG00000037843	tor4aa	10:3030375-3038993	wt	Mo	OK	0.139287	1.20488	1.34417	3.11275	2.9311	0.00195	0.0269377	yes
ENSDARG00000020417	emx3	14:26065431-26078939	wt	Mo	OK	13.9536	21.0781	35.0317	0.595116	2.063	0.0005	0.0100956	yes
ENSDARG00000077004	aldh1l1	6:20008588-20042102	wt	Mo	OK	4.76187	7.18681	11.9487	0.593824	1.81845	0.00165	0.0238532	yes
ENSDARG00000037910	filip1l	11:43976546-44029701	wt	Mo	OK	0.817413	2.3488	3.16621	1.52279	2.21538	0.00015	0.00390457	yes
ENSDARG00000063718	vps72	19:365826-372951	wt	Mo	OK	14.0129	21.1427	35.1556	0.593407	2.04527	0.00035	0.0076251	yes
ENSDARG00000007918	ttc27	17:22740289-22927281	wt	Mo	OK	26.3672	39.776	66.1432	0.593154	2.12921	0.00015	0.00390457	yes
ENSDARG00000035879	fuca1.2	19:32901451-32906746	wt	Mo	OK	15.2384	22.9574	38.1958	0.591248	1.95519	0.00075	0.0137623	yes
ENSDARG00000042087	dmap1	8:18320389-18332024	wt	Mo	OK	11.8566	17.8468	29.7034	0.589981	1.93342	0.00045	0.00927217	yes
ENSDARG00000071410	cks2	22:21288340-21326491	wt	Mo	OK	23.6179	35.5029	59.1208	0.588056	1.72534	0.00385	0.0441897	yes
ENSDARG00000104944	si:ch73-36p18.2	25:34615322-34615733	wt	Mo	OK	297.383	445.775	743.158	0.583991	2.01191	0.0006	0.0117405	yes
ENSDARG00000038315	pdxp	10:2652751-2655608	wt	Mo	OK	2.63766	4.55044	7.1881	0.786746	1.88905	0.00155	0.0227929	yes
ENSDARG00000038359	enosf1	7:56807802-56828567	wt	Mo	OK	3.42547	1.20809	4.63356	-1.50358	-2.27547	0.00015	0.00390457	yes
ENSDARG00000038424	si:dkey-8k3.2	16:16757225-16793741	wt	Mo	OK	1.46498	0.315472	1.78045	-2.21529	-2.34184	5e-05	0.00153795	yes
ENSDARG00000103108	ACVR2B (1 of many)	2:52225339-52262103	wt	Mo	OK	56.7343	85.0197	141.754	0.583577	2.11583	0.0002	0.00492144	yes
ENSDARG00000038618	cpt2	8:21105360-21110517	wt	Mo	OK	6.27323	3.60022	9.87345	-0.801121	-1.78857	0.0018	0.025441	yes
ENSDARG00000038720	si:ch211-14a17.7	2:38300318-38302421	wt	Mo	OK	1.49279	3.7415	5.23429	1.32561	2.41955	5e-05	0.00153795	yes
ENSDARG00000063249	mrpl9	19:7599378-7606663	wt	Mo	OK	9.90465	14.8125	24.7172	0.580634	1.80722	0.0017	0.024452	yes
ENSDARG00000058365	hspb8	5:15319430-15340268	wt	Mo	OK	11.8798	17.7126	29.5924	0.576266	1.90727	0.00095	0.0162469	yes
ENSDARG00000038957	flvcr2a	17:51816810-51840175	wt	Mo	OK	1.52306	0.387717	1.91078	-1.9739	-2.74136	5e-05	0.00153795	yes
ENSDARG00000039066	klhl31	13:2303262-2315264	wt	Mo	OK	0.864527	0.393743	1.25827	-1.13465	-1.90177	0.00115	0.0186952	yes
ENSDARG00000039077	tyr	15:43776249-43795256	wt	Mo	OK	4.75104	1.37227	6.12331	-1.79168	-4.02764	5e-05	0.00153795	yes
ENSDARG00000039108	trim35-9	3:8253475-8407381	wt	Mo	OK	2.98884	1.33733	4.32617	-1.16023	-1.95066	0.00125	0.0197028	yes
ENSDARG00000063218	ppm1la	2:6353885-6380628	wt	Mo	OK	14.0837	20.9666	35.0503	0.574073	1.96929	0.00085	0.0149401	yes
ENSDARG00000039164	mhc1uma	22:5323740-5328885	wt	Mo	OK	1.79065	0.914502	2.70515	-0.969428	-1.72051	0.00455	0.0498808	yes
ENSDARG00000039241	prkca	6:19167655-19330214	wt	Mo	OK	6.1264	3.79862	9.92502	-0.689565	-1.89899	0.00185	0.0258486	yes
ENSDARG00000060065	ubap2b	8:45285863-45320773	wt	Mo	OK	22.677	33.7586	56.4356	0.574025	1.8868	0.00015	0.00390457	yes
ENSDARG00000039459	qsox1	8:14465904-14517080	wt	Mo	OK	4.25316	2.66008	6.91324	-0.677062	-1.83857	0.0018	0.025441	yes
ENSDARG00000063321	rabl2	18:7680465-7689785	wt	Mo	OK	15.8163	23.5308	39.3471	0.573138	1.83676	0.0018	0.025441	yes
ENSDARG00000036844	tsen54	3:60299982-60334005	wt	Mo	OK	9.05732	13.4685	22.5258	0.572434	1.70969	0.0036	0.0421982	yes
ENSDARG00000039615	fgf8b	1:30905705-30910934	wt	Mo	OK	1.38741	0.613685	2.0011	-1.17682	-2.15329	0.0005	0.0100956	yes
ENSDARG00000026595	pafah1b1b	21:39378915-39409134	wt	Mo	OK	14.0091	20.8298	34.8389	0.572287	1.99308	0.00065	0.0123928	yes
ENSDARG00000028943	mtss1la	18:14801784-14868551	wt	Mo	OK	6.99995	10.3958	17.3957	0.570584	1.84661	0.0015	0.0224044	yes
ENSDARG00000089075	si:ch73-173p19.1	24:33478287-33514547	wt	Mo	OK	4.20344	6.23878	10.4422	0.569695	1.82909	0.00145	0.0219063	yes
ENSDARG00000040027	osbpl10	16:39321147-39432578	wt	Mo	OK	5.29407	3.19178	8.48585	-0.730015	-2.07032	0.0005	0.0100956	yes
ENSDARG00000040036	tcf19l	19:6912423-6925175	wt	Mo	OK	5.09971	3.47323	8.57294	-0.554138	-1.7559	0.00225	0.0300621	yes
ENSDARG00000016302	upf1	2:56045566-56111198	wt	Mo	OK	31.1634	46.2464	77.4098	0.569489	2.04735	0.00025	0.00588102	yes
ENSDARG00000041830	tsn	9:23118805-23128641	wt	Mo	OK	34.7924	51.6244	86.4168	0.56928	2.04643	0.00045	0.00927217	yes
ENSDARG00000040161	zgc:92287	23:18106225-18131615	wt	Mo	OK	1.47985	3.75808	5.23793	1.34455	1.86012	0.00025	0.00588102	yes
ENSDARG00000040186	fam210ab	16:30646459-30654803	wt	Mo	OK	10.3302	15.3029	25.6331	0.566942	1.74304	0.0032	0.0387033	yes
ENSDARG00000044488	pak1ip1	24:36270672-36287293	wt	Mo	OK	57.4283	85.0343	142.463	0.566282	2.00056	0.00075	0.0137623	yes
ENSDARG00000006911	wnt8b	13:29860639-29875810	wt	Mo	OK	7.37088	10.9116	18.2825	0.565955	1.87614	0.00135	0.0208938	yes
ENSDARG00000079780	HNRNPUL1 (1 of many)	5:61136335-61158160	wt	Mo	OK	54.2174	80.1927	134.41	0.564715	2.04801	0.00045	0.00927217	yes
ENSDARG00000074328	apba1b	10:15819092-15855160	wt	Mo	OK	4.52597	6.69351	11.2195	0.564537	1.72001	0.003	0.0371513	yes
ENSDARG00000040362	ehd2b	18:44656349-44669790	wt	Mo	OK	3.26424	1.31161	4.57585	-1.31541	-3.2007	5e-05	0.00153795	yes
ENSDARG00000074332	SPEN (1 of many)	22:137127-182688	wt	Mo	OK	14.4746	21.4004	35.875	0.564117	1.65019	0.0028	0.0353922	yes
ENSDARG00000001634	kirrela	7:18818196-18894659	wt	Mo	OK	16.4135	24.2606	40.6741	0.563733	1.94291	0.00055	0.0108993	yes
ENSDARG00000037837	ogfr	23:565424-575455	wt	Mo	OK	7.60803	11.2415	18.8495	0.563233	1.9092	0.00085	0.0149401	yes
ENSDARG00000100715	tlk1b	6:3716846-3763903	wt	Mo	OK	27.5735	40.7334	68.3069	0.562932	2.0102	0.00065	0.0123928	yes
ENSDARG00000040623	fosl2	17:41313751-41329686	wt	Mo	OK	3.33373	2.22368	5.55741	-0.58419	-1.75351	0.00175	0.0249821	yes
ENSDARG00000040640	si:ch73-44m9.3	22:7729315-7748986	wt	Mo	OK	2.67826	0.596583	3.27484	-2.1665	-2.13805	0.00045	0.00927217	yes
ENSDARG00000078935	ttll4	9:14141271-14175950	wt	Mo	OK	19.0874	28.1619	47.2493	0.561121	2.01419	0.0002	0.00492144	yes
ENSDARG00000040684	plcd4b	9:38562420-38579069	wt	Mo	OK	2.66283	1.39376	4.05659	-0.933981	-2.21487	0.00025	0.00588102	yes
ENSDARG00000070187	dyrk1b	16:42107965-42202113	wt	Mo	OK	6.86536	10.1272	16.9926	0.56083	1.86201	0.0012	0.0191619	yes
ENSDARG00000040712	adprh	12:15110314-15157920	wt	Mo	OK	4.73077	1.32997	6.06074	-1.83068	-3.61434	5e-05	0.00153795	yes
ENSDARG00000040815	tsku	15:29410403-29421144	wt	Mo	OK	3.23155	5.56932	8.80087	0.785275	2.14576	0.00025	0.00588102	yes
ENSDARG00000040920	si:dkey-49n23.1	22:30862500-30986315	wt	Mo	OK	3.33075	5.12259	8.45334	0.621027	1.80464	0.00205	0.0279355	yes
ENSDARG00000087074	znf574	16:11406800-11453825	wt	Mo	OK	10.3105	15.2063	25.5168	0.560548	1.89973	0.00035	0.0076251	yes
ENSDARG00000040991	cttnbp2	18:20736178-20832827	wt	Mo	OK	2.37476	3.58598	5.96074	0.594584	1.81214	0.00165	0.0238532	yes
ENSDARG00000041041	cxcr3.2	16:11927223-11934401	wt	Mo	OK	1.63245	0.72633	2.35878	-1.16834	-2.01432	0.00165	0.0238532	yes
ENSDARG00000002510	dmbx1b	6:3403607-3413527	wt	Mo	OK	8.86964	13.0794	21.949	0.560352	1.65924	0.00365	0.042522	yes
ENSDARG00000030665	TCERG1 (1 of many)	21:41768898-41805011	wt	Mo	OK	4.89586	7.21815	12.114	0.560066	1.7253	0.00305	0.03758	yes
ENSDARG00000041071	jagn1a	9:30297894-30300359	wt	Mo	OK	7.28773	2.37769	9.66542	-1.61591	-3.62931	5e-05	0.00153795	yes
ENSDARG00000054454	epha4a	2:40102168-40170399	wt	Mo	OK	54.2748	79.9891	134.264	0.559521	1.67833	0.00375	0.0433328	yes
ENSDARG00000041119	ceacam1	16:11833327-11869694	wt	Mo	OK	0.989505	0.438289	1.42779	-1.17482	-2.17172	0.00045	0.00927217	yes
ENSDARG00000056978	letm1	13:12901361-12967893	wt	Mo	OK	11.0001	16.2106	27.2107	0.559421	1.7752	0.00225	0.0300621	yes
ENSDARG00000071684	rx1	22:4614880-4622426	wt	Mo	OK	21.2386	31.2503	52.4889	0.557176	1.65754	0.00335	0.0400082	yes
ENSDARG00000041257	smtnl1	14:16802349-16816060	wt	Mo	OK	1.63662	0.482988	2.11961	-1.76066	-2.26616	0.00135	0.0208938	yes
ENSDARG00000036359	minal	10:37570-42845	wt	Mo	OK	14.2186	20.9206	35.1392	0.55714	1.85078	0.0013	0.0202483	yes
ENSDARG00000041323	csdc2a	12:18977389-18981616	wt	Mo	OK	3.15709	1.67899	4.83608	-0.911006	-1.83246	0.0024	0.0315002	yes
ENSDARG00000020131	fnbp1l	8:14949300-15043927	wt	Mo	OK	18.8308	27.6884	46.5192	0.55619	1.51333	0.0036	0.0421982	yes
ENSDARG00000078500	dap3	16:14311280-14325497	wt	Mo	OK	17.5371	25.7693	43.3064	0.555242	1.75419	0.0028	0.0353922	yes
ENSDARG00000100481	smg6	10:35640786-35669892	wt	Mo	OK	6.22579	9.13273	15.3585	0.55279	1.89787	0.00115	0.0186952	yes
ENSDARG00000037879	lfng	3:41775640-41785011	wt	Mo	OK	164.589	241.221	405.81	0.551494	1.66184	0.0012	0.0191619	yes
ENSDARG00000041645	A2ML1 (1 of many)	15:21178232-21303684	wt	Mo	OK	3.35488	1.34097	4.69585	-1.32298	-2.27414	5e-05	0.00153795	yes
ENSDARG00000041691	bhlhe41	18:16136785-16141099	wt	Mo	OK	1.03104	0.45985	1.49089	-1.16487	-2.15925	0.00075	0.0137623	yes
ENSDARG00000075323	srfbp1	19:29708967-29716565	wt	Mo	OK	8.78679	12.8698	21.6566	0.550581	1.83749	0.0017	0.024452	yes
ENSDARG00000040266	sox19b	7:26223389-26226754	wt	Mo	OK	67.0496	98.1692	165.219	0.550041	1.99917	0.00085	0.0149401	yes
ENSDARG00000041952	prox2	17:52407198-52434702	wt	Mo	OK	2.85742	1.52474	4.38216	-0.906148	-2.0994	0.00045	0.00927217	yes
ENSDARG00000042010	PKLR	16:54629440-54634651	wt	Mo	OK	2.01755	0.635037	2.65259	-1.66769	-2.77662	0.0001	0.00278989	yes
ENSDARG00000042018	fhl2a	9:6600594-6624003	wt	Mo	OK	4.04162	0.44971	4.49133	-3.16786	-3.34942	5e-05	0.00153795	yes
ENSDARG00000069920	cox17	9:21424819-21427376	wt	Mo	OK	61.19	89.4998	150.69	0.548588	1.73461	0.0029	0.0362013	yes
ENSDARG00000042141	myo6b	17:36679513-36894549	wt	Mo	OK	1.9566	3.0953	5.0519	0.661729	1.80681	0.00245	0.0320091	yes
ENSDARG00000014348	stk17b	9:24381500-24390290	wt	Mo	OK	10.5648	15.4373	26.0021	0.547154	1.72228	0.0022	0.0295325	yes
ENSDARG00000042285	atp8b3	22:20436509-20490369	wt	Mo	OK	2.64732	1.44651	4.09383	-0.871951	-2.50369	5e-05	0.00153795	yes
ENSDARG00000105482	si:ch1073-153i20.1	7:6302304-6302727	wt	Mo	OK	1245.34	1817.44	3062.78	0.545367	1.86473	0.00105	0.0175705	yes
ENSDARG00000042521	SLC25A5 (1 of many)	5:66770294-66781169	wt	Mo	OK	5.03915	2.51314	7.55229	-1.00369	-1.90222	0.0013	0.0202483	yes
ENSDARG00000042535	actc1a	20:29574264-29580635	wt	Mo	OK	2.84422	0.39899	3.24321	-2.83361	-3.75109	5e-05	0.00153795	yes
ENSDARG00000042557	rnf144ab	20:29931408-29961707	wt	Mo	OK	2.10955	4.45024	6.55979	1.07695	2.68178	5e-05	0.00153795	yes
ENSDARG00000095224	camkmt	13:10228016-10324971	wt	Mo	OK	4.63012	6.75639	11.3865	0.545204	1.69265	0.0036	0.0421982	yes
ENSDARG00000032261	rngtt	20:923052-1099230	wt	Mo	OK	16.4971	24.061	40.5581	0.544487	1.8887	0.00075	0.0137623	yes
ENSDARG00000077467	sox10	3:2013056-2022138	wt	Mo	OK	4.15523	6.05871	10.2139	0.544082	1.6415	0.00345	0.0409451	yes
ENSDARG00000058702	vax2	7:8598326-8635556	wt	Mo	OK	14.8491	21.6485	36.4976	0.543896	1.63474	0.0042	0.0471006	yes
ENSDARG00000042807	slc16a4	8:24725901-24760750	wt	Mo	OK	1.69969	0.986796	2.68649	-0.78445	-1.82568	0.00155	0.0227929	yes
ENSDARG00000043559	gle1	8:2484981-2516238	wt	Mo	OK	14.0632	20.4793	34.5425	0.542241	1.57794	0.00175	0.0249821	yes
ENSDARG00000042829	si:dkey-30j22.1	20:35665672-35803500	wt	Mo	OK	1.31016	0.738097	2.04826	-0.82786	-2.52596	5e-05	0.00153795	yes
ENSDARG00000079504	mfn2	8:47908741-47959911	wt	Mo	OK	6.09488	8.8751	14.97	0.542165	1.85002	0.0014	0.0213775	yes
ENSDARG00000100553	lsm14ab	18:413602-436294	wt	Mo	OK	21.8123	31.7451	53.5574	0.541394	1.86811	0.00145	0.0219063	yes
ENSDARG00000032617	fgfrl1a	14:17116014-17258120	wt	Mo	OK	22.8139	33.2013	56.0152	0.541326	1.84358	0.0019	0.0263534	yes
ENSDARG00000015472	gpc4	14:30749836-30810834	wt	Mo	OK	33.3639	48.4716	81.8355	0.53885	1.9608	0.00055	0.0108993	yes
ENSDARG00000042978	cyp2p6	20:25664014-25669351	wt	Mo	OK	1.78382	4.10199	5.88581	1.20136	2.96672	5e-05	0.00153795	yes
ENSDARG00000042980	cyp2p7	20:25669603-25674720	wt	Mo	OK	1.12047	2.35957	3.48004	1.07441	2.21596	0.0008	0.0143865	yes
ENSDARG00000054864	aplp2	18:44371075-44533486	wt	Mo	OK	19.7978	28.7463	48.5441	0.538038	1.94825	0.00085	0.0149401	yes
ENSDARG00000051775	zgc:110434	25:34559683-34560070	wt	Mo	OK	231.183	335.578	566.761	0.537612	1.8292	0.00125	0.0197028	yes
ENSDARG00000097848	si:ch73-111k20.3	15:510811-516506	wt	Mo	OK	6.24966	9.06973	15.3194	0.537281	1.65752	0.00365	0.042522	yes
ENSDARG00000062699	nkain4	23:14509044-14647862	wt	Mo	OK	28.1581	40.8161	68.9742	0.53559	1.79473	0.0015	0.0224044	yes
ENSDARG00000016239	psmd13	25:10388296-10399973	wt	Mo	OK	51.9761	75.3007	127.277	0.534816	1.71031	0.00415	0.0467237	yes
ENSDARG00000043236	ccna1	10:34964475-34972124	wt	Mo	OK	0.515131	1.80553	2.32066	1.80941	2.23247	0.0008	0.0143865	yes
ENSDARG00000043238	atg16l2	15:5483540-5575763	wt	Mo	OK	1.45733	0.583979	2.04131	-1.31934	-1.92724	0.0007	0.0130978	yes
ENSDARG00000043279	aqp12	22:2857784-2870671	wt	Mo	OK	3.41543	0.745307	4.16074	-2.19616	-3.41266	5e-05	0.00153795	yes
ENSDARG00000043323	lnx1	20:22766859-22899121	wt	Mo	OK	1.18191	4.43318	5.61509	1.90723	2.63952	0.0002	0.00492144	yes
ENSDARG00000043328	fip1l1a	20:22766859-22899121	wt	Mo	OK	1.11964	3.44108	4.56072	1.61983	2.10275	5e-05	0.00153795	yes
ENSDARG00000043431	b3gntl1	1:56632800-56649965	wt	Mo	OK	5.31263	2.15514	7.46777	-1.30164	-2.74416	5e-05	0.00153795	yes
ENSDARG00000043443	kcnj13	15:40370203-40420433	wt	Mo	OK	2.04974	1.27329	3.32303	-0.686877	-1.80659	0.00125	0.0197028	yes
ENSDARG00000043448	itm2ca	15:40161317-40181831	wt	Mo	OK	0.564646	1.17895	1.7436	1.06208	1.97588	0.00155	0.0227929	yes
ENSDARG00000105370	znf628	16:12730820-12738889	wt	Mo	OK	9.13209	13.2301	22.3622	0.534806	1.86783	0.00155	0.0227929	yes
ENSDARG00000098237	fbn2b	22:4071518-4116819	wt	Mo	OK	16.0977	23.2925	39.3902	0.533012	1.9034	0.0011	0.018176	yes
ENSDARG00000062019	rufy2	13:22746016-22776810	wt	Mo	OK	6.19359	8.92737	15.121	0.527459	1.66777	0.00375	0.0433328	yes
ENSDARG00000104130	rbm26	6:4211039-4241150	wt	Mo	OK	4.16534	6.00278	10.1681	0.527196	1.63706	0.004	0.0454538	yes
ENSDARG00000043514	si:dkey-239i20.4	20:15215448-15232648	wt	Mo	OK	1.42519	0.414631	1.83982	-1.78125	-3.16204	5e-05	0.00153795	yes
ENSDARG00000006242	ptp4a1	11:11284207-11291298	wt	Mo	OK	95.5097	137.629	233.139	0.527063	1.67065	0.0039	0.0445841	yes
ENSDARG00000036161	hnrnpa0l	14:38509117-38510619	wt	Mo	OK	561.101	808.005	1369.11	0.526102	1.80672	0.00155	0.0227929	yes
ENSDARG00000003151	skp1	21:45300974-45308737	wt	Mo	OK	99.2921	142.969	242.261	0.525956	1.78952	0.00265	0.033897	yes
ENSDARG00000043581	gadd45aa	2:10497045-10500973	wt	Mo	OK	1.58334	3.72394	5.30728	1.23386	2.41147	5e-05	0.00153795	yes
ENSDARG00000043697	nefmb	8:6819913-6823342	wt	Mo	OK	0.950308	0.236443	1.18675	-2.0069	-2.75323	5e-05	0.00153795	yes
ENSDARG00000074807	tbrg4	16:27725382-27743307	wt	Mo	OK	15.1076	21.7377	36.8453	0.524921	1.79091	0.0021	0.0285033	yes
ENSDARG00000017676	mmp2	7:35138572-35161424	wt	Mo	OK	29.9038	42.9587	72.8625	0.522622	1.88546	0.0013	0.0202483	yes
ENSDARG00000043963	si:ch211-241j12.3	20:170641-194206	wt	Mo	OK	1.69743	2.80913	4.50656	0.726774	2.11265	0.00015	0.00390457	yes
ENSDARG00000044010	loxl2a	10:20448330-20490054	wt	Mo	OK	3.09496	6.38563	9.48059	1.04491	2.96212	5e-05	0.00153795	yes
ENSDARG00000016871	smarce1	3:34856361-34865480	wt	Mo	OK	57.4502	82.4243	139.875	0.520757	1.88254	0.001	0.0168992	yes
ENSDARG00000101244	gli1	6:59430936-59510495	wt	Mo	OK	10.6591	15.2531	25.9122	0.517016	1.85515	0.00115	0.0186952	yes
ENSDARG00000082753	AC024175.17	MT:1019-1971	wt	Mo	OK	32.9583	47.143	80.1013	0.516401	1.64521	0.0045	0.0495232	yes
ENSDARG00000025391	pfdn2	7:7244028-7260389	wt	Mo	OK	52.5299	75.1104	127.64	0.515873	1.86072	0.00155	0.0227929	yes
ENSDARG00000028688	exosc2	5:71352824-71358786	wt	Mo	OK	35.1822	50.2504	85.4326	0.51429	1.72714	0.00235	0.0310825	yes
ENSDARG00000044375	zgc:158291	21:38264842-38267535	wt	Mo	OK	1.46798	0.452567	1.92055	-1.69763	-2.85709	5e-05	0.00153795	yes
ENSDARG00000013207	zeb1b	12:26658913-26760366	wt	Mo	OK	13.0842	18.6843	31.7685	0.514001	1.83378	0.00105	0.0175705	yes
ENSDARG00000043485	si:ch211-22i13.2	20:14107079-14116879	wt	Mo	OK	19.2974	27.5379	46.8353	0.513016	1.67198	0.00395	0.0450053	yes
ENSDARG00000100825	calm3a	15:9257980-9296257	wt	Mo	OK	9.75418	13.906	23.6602	0.511614	1.64082	0.00385	0.0441897	yes
ENSDARG00000044685	nr0b2a	16:55167504-55172525	wt	Mo	OK	2.3082	0.877518	3.18572	-1.39527	-3.05367	5e-05	0.00153795	yes
ENSDARG00000089701	TRABD2A	5:198582-248894	wt	Mo	OK	10.0824	14.3593	24.4417	0.510141	1.67413	0.0039	0.0445841	yes
ENSDARG00000044695	ccdc80l2	21:19797435-19805234	wt	Mo	OK	2.0934	1.18697	3.28037	-0.818556	-1.77414	0.00265	0.033897	yes
ENSDARG00000044803	dhrs3b	11:28343558-28367434	wt	Mo	OK	2.42452	0.904372	3.32889	-1.42271	-1.99516	0.0015	0.0224044	yes
ENSDARG00000044895	fmoda	11:20865326-20871205	wt	Mo	OK	6.47448	1.93405	8.40853	-1.74314	-4.26813	5e-05	0.00153795	yes
ENSDARG00000002787	tle3a	18:20236894-20268445	wt	Mo	OK	10.0025	14.2451	24.2476	0.510103	1.7178	0.003	0.0371513	yes
ENSDARG00000044975	krt94	11:11484944-11488236	wt	Mo	OK	5.34897	1.69838	7.04735	-1.6551	-3.87991	5e-05	0.00153795	yes
ENSDARG00000045014	tuba2	11:3268363-3275303	wt	Mo	OK	3.39551	1.36868	4.76419	-1.31085	-2.58966	5e-05	0.00153795	yes
ENSDARG00000077093	scaf4a	10:25738997-25755170	wt	Mo	OK	16.6173	23.6548	40.2721	0.509447	1.82308	0.00105	0.0175705	yes
ENSDARG00000105117	sdad1	21:9274233-9291641	wt	Mo	OK	47.1509	66.9472	114.098	0.505738	1.81653	0.00125	0.0197028	yes
ENSDARG00000006038	aebp2	4:2993087-3015195	wt	Mo	OK	21.0609	29.8828	50.9437	0.504747	1.6332	0.00365	0.042522	yes
ENSDARG00000045200	dusp19b	7:6534619-6544930	wt	Mo	OK	3.02302	6.1662	9.18922	1.02839	1.7129	0.00345	0.0409451	yes
ENSDARG00000002217	scocb	14:49944477-49951803	wt	Mo	OK	11.8435	16.7695	28.613	0.501749	1.71295	0.0033	0.0396324	yes
ENSDARG00000045316	map7d2b	24:23975597-24018027	wt	Mo	OK	3.45557	1.87594	5.33151	-0.881312	-1.96547	0.00025	0.00588102	yes
ENSDARG00000074715	stk17a	24:192920-237053	wt	Mo	OK	9.10238	12.8829	21.9853	0.50114	1.71186	0.0026	0.0335333	yes
ENSDARG00000058861	ncl1	22:4849020-4867637	wt	Mo	OK	40.9098	57.8897	98.7995	0.500861	1.78734	0.0018	0.025441	yes
ENSDARG00000045438	GJD4	24:4402485-4408464	wt	Mo	OK	1.58209	0.936847	2.51894	-0.755943	-1.74895	0.0028	0.0353922	yes
ENSDARG00000045516	itih2	4:25192373-25226770	wt	Mo	OK	6.75619	2.27107	9.02726	-1.57284	-2.16316	0.0008	0.0143865	yes
ENSDARG00000045519	sfmbt2	4:25311775-25373594	wt	Mo	OK	1.14726	0.497791	1.64505	-1.20458	-2.1839	0.00035	0.0076251	yes
ENSDARG00000045530	si:ch211-244b2.4	4:26107182-26130947	wt	Mo	OK	1.04168	2.03248	3.07416	0.964332	1.98155	0.0008	0.0143865	yes
ENSDARG00000070658	zbtb12.2	19:27372134-27380125	wt	Mo	OK	13.2531	18.7462	31.9993	0.500267	1.65453	0.0043	0.0477834	yes
ENSDARG00000045636	rbl2	25:35506530-35539644	wt	Mo	OK	0.50108	2.97747	3.47855	2.57098	6.59257	5e-05	0.00153795	yes
ENSDARG00000016084	spsb4a	2:39618426-39710190	wt	Mo	OK	17.9194	25.3388	43.2582	0.499823	1.65355	0.00305	0.03758	yes
ENSDARG00000068280	GRB14	9:50609849-50647860	wt	Mo	OK	16.9094	23.8162	40.7256	0.49412	1.6816	0.0035	0.0414522	yes
ENSDARG00000045803	mfge8b	25:19051374-19095449	wt	Mo	OK	1.36377	2.40171	3.76548	0.816461	2.20961	0.0001	0.00278989	yes
ENSDARG00000077897	znf296	18:36650914-36667290	wt	Mo	OK	8.77415	12.3165	21.0907	0.489262	1.59313	0.00355	0.0418993	yes
ENSDARG00000011863	ptk7a	22:38408215-38473168	wt	Mo	OK	28.1523	39.481	67.6333	0.487905	1.72148	0.0023	0.0305868	yes
ENSDARG00000056184	dvl2	7:20008203-20043464	wt	Mo	OK	15.0191	21.0576	36.0767	0.487543	1.74371	0.0031	0.0379229	yes
ENSDARG00000045959	csf3r	16:3207374-3230290	wt	Mo	OK	1.61068	0.635384	2.24606	-1.34197	-2.52486	0.00025	0.00588102	yes
ENSDARG00000099109	si:ch1073-82k10.1	7:72394910-72500883	wt	Mo	OK	14.9852	20.9951	35.9803	0.486516	1.75009	0.00215	0.0289979	yes
ENSDARG00000046012	slc47a1	21:39917630-39950359	wt	Mo	OK	6.8356	2.7848	9.6204	-1.29549	-2.53996	5e-05	0.00153795	yes
ENSDARG00000098168	Metazoa_SRP	11:11431891-11432188	wt	Mo	OK	3329.63	4646.08	7975.71	0.480653	1.72502	0.0022	0.0295325	yes
ENSDARG00000075612	ercc6	13:30743720-30779522	wt	Mo	OK	9.99271	13.9283	23.921	0.47907	1.69629	0.00375	0.0433328	yes
ENSDARG00000054570	smg1	3:30987183-31027595	wt	Mo	OK	13.8383	19.2803	33.1186	0.478453	1.71868	0.00265	0.033897	yes
ENSDARG00000021442	cdh11	7:43420923-43501455	wt	Mo	OK	13.7519	19.1589	32.9108	0.478383	1.69313	0.0031	0.0379229	yes
ENSDARG00000013892	sorl1	15:21605277-21733886	wt	Mo	OK	5.11645	7.12469	12.2411	0.477684	1.66291	0.0036	0.0421982	yes
ENSDARG00000036826	ankrd52a	23:32435553-32464211	wt	Mo	OK	11.347	15.7746	27.1216	0.475295	1.63395	0.0044	0.0486418	yes
ENSDARG00000018968	acvr1ba	23:27873977-27896379	wt	Mo	OK	26.1958	36.4174	62.6132	0.47529	1.64796	0.00265	0.033897	yes
ENSDARG00000038239	tnpo2	3:18657783-18689492	wt	Mo	OK	102.331	142.183	244.514	0.474503	1.65273	0.00315	0.0382609	yes
ENSDARG00000035608	pgam5	5:18421574-18432443	wt	Mo	OK	28.4669	39.2722	67.7391	0.464223	1.65258	0.00405	0.0458696	yes
ENSDARG00000052039	caspb	1:57315222-57329056	wt	Mo	OK	1.24618	0.56047	1.80665	-1.15281	-1.80107	0.0023	0.0305868	yes
ENSDARG00000052129	boka	6:27069067-27098131	wt	Mo	OK	5.12094	3.01858	8.13952	-0.762539	-2.04551	0.00035	0.0076251	yes
ENSDARG00000019726	celsr2	22:393426-430714	wt	Mo	OK	10.1155	13.9505	24.066	0.463752	1.61784	0.00445	0.0490676	yes
ENSDARG00000014008	cwc22	9:43750727-43842474	wt	Mo	OK	32.9136	45.368	78.2816	0.462992	1.60723	0.00365	0.042522	yes
ENSDARG00000033840	fat3a	15:40707913-41032535	wt	Mo	OK	9.64985	13.2677	22.9175	0.459343	1.64518	0.0039	0.0445841	yes
ENSDARG00000052465	dusp10	20:52105401-52133916	wt	Mo	OK	0.863632	2.50963	3.37326	1.53899	1.81459	0.0043	0.0477834	yes
ENSDARG00000052688	paqr5b	7:33185997-33341066	wt	Mo	OK	2.72869	1.05216	3.78085	-1.37485	-2.46368	5e-05	0.00153795	yes
ENSDARG00000052708	tnni1b	6:54796408-54816373	wt	Mo	OK	3.65692	1.168	4.82492	-1.64658	-2.27673	5e-05	0.00153795	yes
ENSDARG00000016484	dkc1	21:43706833-43721295	wt	Mo	OK	82.0525	112.273	194.325	0.452397	1.63564	0.0043	0.0477834	yes
ENSDARG00000028198	ube2v2	24:35634200-35646176	wt	Mo	OK	53.9534	73.5275	127.481	0.446571	1.61023	0.00455	0.0498808	yes
ENSDARG00000052748	capn1b	22:26278243-26303997	wt	Mo	OK	3.88822	2.03129	5.91951	-0.936712	-2.39694	5e-05	0.00153795	yes
ENSDARG00000052783	cdc42ep3	13:41967910-42180452	wt	Mo	OK	6.30437	2.70013	9.0045	-1.22332	-3.01809	5e-05	0.00153795	yes
ENSDARG00000005941	yes1	2:31287863-31393389	wt	Mo	OK	45.4318	40.291	85.7228	-0.173244	-0.608851	0.28065	0.615501	no
ENSDARG00000052826	runx3	13:44955861-45063957	wt	Mo	OK	0.765711	0.33997	1.10568	-1.17139	-1.98066	0.0004	0.00842463	yes
ENSDARG00000010946	cbsb	9:9205231-9250915	wt	Mo	OK	52.2772	37.9539	90.2311	-0.461933	-1.66902	0.0032	0.0387033	yes
ENSDARG00000052903	rtkn2b	21:11163796-11193855	wt	Mo	OK	1.66777	3.56785	5.23562	1.09713	2.03987	0.0013	0.0202483	yes
ENSDARG00000052923	zgc:113162	21:13286683-13335815	wt	Mo	OK	0.774709	1.69164	2.46635	1.1267	1.68097	0.00115	0.0186952	yes
ENSDARG00000053027	si:dkey-33i11.1	16:45336379-45361477	wt	Mo	OK	2.54995	0.86238	3.41233	-1.56408	-2.19952	0.0008	0.0143865	yes
ENSDARG00000057114	HPF1	1:13333895-13340263	wt	Mo	OK	70.9119	51.423	122.335	-0.463614	-1.66992	0.0038	0.0437332	yes
ENSDARG00000053104	fam102ba	2:45812494-45838130	wt	Mo	OK	5.54533	3.12598	8.67131	-0.826966	-1.92606	0.0011	0.018176	yes
ENSDARG00000034823	copg2	4:15984785-15997436	wt	Mo	OK	88.7509	64.2641	153.015	-0.465748	-1.68691	0.00335	0.0400082	yes
ENSDARG00000015208	rbb4l	11:12686957-12710968	wt	Mo	OK	146.26	105.866	252.126	-0.466304	-1.64195	0.0041	0.0462521	yes
ENSDARG00000076239	si:ch211-74f19.2	7:8644407-8715983	wt	Mo	OK	54.5302	39.4686	93.9988	-0.46635	-1.67154	0.0044	0.0486418	yes
ENSDARG00000053318	lrrc6	2:43248818-43274531	wt	Mo	OK	0.713093	2.09318	2.80627	1.55353	2.73758	5e-05	0.00153795	yes
ENSDARG00000053448	si:ch211-251f6.6	10:8086654-8121037	wt	Mo	OK	3.97637	0.545047	4.52142	-2.867	-2.41046	0.00185	0.0258486	yes
ENSDARG00000052712	suclg1	1:42951315-42983420	wt	Mo	OK	97.2479	70.1335	167.381	-0.471565	-1.68055	0.0039	0.0445841	yes
ENSDARG00000053499	isl2b	7:29721738-29726294	wt	Mo	OK	1.63709	0.574037	2.21113	-1.51192	-2.5588	0.0002	0.00492144	yes
ENSDARG00000038868	eng2b	2:29992885-29996423	wt	Mo	OK	54.9419	39.5679	94.5098	-0.473577	-1.68381	0.00315	0.0382609	yes
ENSDARG00000053559	tspan3b	7:29804094-29811781	wt	Mo	OK	0.406997	0.793335	1.20033	0.962911	1.73451	0.00455	0.0498808	yes
ENSDARG00000068587	rabggtb	2:26807321-26813459	wt	Mo	OK	36.3759	26.1454	62.5213	-0.476423	-1.65368	0.0036	0.0421982	yes
ENSDARG00000053831	vtnb	21:39022453-39036049	wt	Mo	OK	1.87048	0.419049	2.28953	-2.15821	-2.84827	5e-05	0.00153795	yes
ENSDARG00000105468	si:ch73-368j24.9	7:6220570-6221058	wt	Mo	OK	680.178	488.416	1168.59	-0.477802	-1.73859	0.003	0.0371513	yes
ENSDARG00000054906	ier5l	5:32191091-32193328	wt	Mo	OK	26.1528	18.7703	44.9231	-0.478518	-1.65221	0.00415	0.0467237	yes
ENSDARG00000053896	slc30a1b	17:37268234-37273459	wt	Mo	OK	3.71722	1.8665	5.58372	-0.993888	-2.21988	0.00025	0.00588102	yes
ENSDARG00000011665	aldoaa	3:39425140-39435194	wt	Mo	OK	309.303	221.598	530.901	-0.48108	-1.70698	0.00245	0.0320091	yes
ENSDARG00000054033	hoxb1b	12:27049779-27051474	wt	Mo	OK	2.08518	0.533255	2.61843	-1.96727	-3.07395	0.0001	0.00278989	yes
ENSDARG00000054202	hbl4	2:37897354-37900799	wt	Mo	OK	1.24959	0.318591	1.56818	-1.97168	-2.19941	0.0043	0.0477834	yes
ENSDARG00000054288	zgc:63972	5:33340061-33359715	wt	Mo	OK	1.60034	3.29079	4.89113	1.04005	2.17696	0.00015	0.00390457	yes
ENSDARG00000054420	rpe65c	8:16666393-16676543	wt	Mo	OK	4.98505	2.29054	7.27559	-1.12192	-2.62028	5e-05	0.00153795	yes
ENSDARG00000054423	slc7a6	7:28352100-28376766	wt	Mo	OK	4.83483	3.09823	7.93306	-0.642022	-1.94951	0.00065	0.0123928	yes
ENSDARG00000043134	cux1b	15:2556746-2580262	wt	Mo	OK	16.9521	12.1436	29.0957	-0.481268	-1.6145	0.0044	0.0486418	yes
ENSDARG00000017696	diexf	13:31794803-31808062	wt	Mo	OK	30.6064	21.892	52.4984	-0.483433	-1.70443	0.00415	0.0467237	yes
ENSDARG00000054584	FO681288.1	18:48949087-48958215	wt	Mo	OK	1.97711	1.04085	3.01796	-0.925633	-2.10565	0.0004	0.00842463	yes
ENSDARG00000054610	coro1a	3:30795521-30810520	wt	Mo	OK	3.04254	1.5999	4.64244	-0.927292	-2.01502	0.00095	0.0162469	yes
ENSDARG00000040432	klf2b	19:17832517-17838270	wt	Mo	OK	16.6111	11.8662	28.4773	-0.485284	-1.6708	0.0034	0.0405204	yes
ENSDARG00000098761	rgs2	22:24219648-24221856	wt	Mo	OK	60.1714	42.8113	102.983	-0.491086	-1.61944	0.004	0.0454538	yes
ENSDARG00000090847	si:ch211-209l18.4	22:6541133-6674702	wt	Mo	OK	13.1627	9.33961	22.5023	-0.495023	-1.61621	0.00455	0.0498808	yes
ENSDARG00000054890	rgra	13:29315775-29325409	wt	Mo	OK	1.5387	4.30325	5.84195	1.48372	2.88937	5e-05	0.00153795	yes
ENSDARG00000100314	Metazoa_SRP	11:11457838-11458135	wt	Mo	OK	1575.61	1117.93	2693.54	-0.49508	-1.78415	0.0024	0.0315002	yes
ENSDARG00000043209	nsun5	10:35209067-35220431	wt	Mo	OK	36.7491	26.0434	62.7925	-0.496792	-1.65844	0.00305	0.03758	yes
ENSDARG00000055118	mylipb	16:25620960-25633706	wt	Mo	OK	3.27029	5.16888	8.43917	0.660435	1.73066	0.00255	0.0330129	yes
ENSDARG00000100047	ergic1	14:15463378-15509424	wt	Mo	OK	18.6449	13.1823	31.8272	-0.500178	-1.7351	0.0031	0.0379229	yes
ENSDARG00000055250	si:ch211-132b12.8	18:40708357-40718345	wt	Mo	OK	0.190171	1.04131	1.23148	2.45303	1.81708	0.00175	0.0249821	yes
ENSDARG00000055255	pitpnm3	15:26745957-26911715	wt	Mo	OK	2.91943	1.77306	4.69249	-0.719448	-2.01892	0.0005	0.0100956	yes
ENSDARG00000055278	cfb	21:27379588-27394702	wt	Mo	OK	1.01623	0.230074	1.2463	-2.14306	-2.83105	0.0001	0.00278989	yes
ENSDARG00000087854	si:dkey-108k21.13	25:34553129-34553504	wt	Mo	OK	468.423	330.929	799.352	-0.50129	-1.72567	0.0031	0.0379229	yes
ENSDARG00000055416	serpinb1	20:26981577-26987759	wt	Mo	OK	3.1157	1.75986	4.87556	-0.824096	-1.67977	0.00425	0.0475056	yes
ENSDARG00000013250	tars	5:43746530-43774821	wt	Mo	OK	94.1036	66.4624	160.566	-0.501712	-1.81339	0.00195	0.0269377	yes
ENSDARG00000055539	epdl2	21:28476361-28486959	wt	Mo	OK	4.99705	0.443919	5.44097	-3.49271	-2.12209	0.0007	0.0130978	yes
ENSDARG00000055565	cacnb2b	2:31479918-31530139	wt	Mo	OK	0.492289	1.51704	2.00933	1.62368	2.29992	0.0001	0.00278989	yes
ENSDARG00000055569	ghdc	12:13489118-13511235	wt	Mo	OK	0.732425	1.72233	2.45476	1.23361	2.44702	0.0003	0.00678651	yes
ENSDARG00000055589	s100t	16:22766427-22767996	wt	Mo	OK	3.13968	1.12705	4.26673	-1.47807	-2.03876	0.0014	0.0213775	yes
ENSDARG00000035870	laptm4b	19:33277456-33301638	wt	Mo	OK	12.1256	8.55451	20.6801	-0.503299	-1.69216	0.0042	0.0471006	yes
ENSDARG00000052455	porcnl	8:22523050-22537534	wt	Mo	OK	21.8196	15.3883	37.2079	-0.503796	-1.69667	0.0025	0.0325133	yes
ENSDARG00000055683	pimr191	15:25144775-25147935	wt	Mo	OK	0.595947	2.52906	3.12501	2.08534	3.61604	5e-05	0.00153795	yes
ENSDARG00000055857	dopey2	9:33343981-33384864	wt	Mo	OK	4.80157	2.75136	7.55293	-0.803361	-2.02172	0.00015	0.00390457	yes
ENSDARG00000002401	gale	17:24861920-24872527	wt	Mo	OK	25.9865	18.3099	44.2964	-0.505137	-1.64657	0.0033	0.0396324	yes
ENSDARG00000017781	hsd17b10	23:18445704-18455018	wt	Mo	OK	54.2422	38.1917	92.4339	-0.506156	-1.74911	0.00185	0.0258486	yes
ENSDARG00000055974	tpmt.1	19:47698690-47707061	wt	Mo	OK	4.72487	2.29923	7.0241	-1.03912	-2.00371	0.001	0.0168992	yes
ENSDARG00000057805	mrpl28	15:17192259-17202618	wt	Mo	OK	28.311	19.9279	48.2389	-0.506575	-1.65578	0.0039	0.0445841	yes
ENSDARG00000058454	dynll1	8:2428706-2432928	wt	Mo	OK	485.882	341.906	827.788	-0.507006	-1.82442	0.00185	0.0258486	yes
ENSDARG00000056080	si:dkey-191g9.5	13:21581833-21608692	wt	Mo	OK	0.529247	1.08409	1.61334	1.03447	1.68006	0.0044	0.0486418	yes
ENSDARG00000044167	padi2	6:47845000-47867099	wt	Mo	OK	45.2208	31.7514	76.9722	-0.51017	-1.7901	0.0021	0.0285033	yes
ENSDARG00000056133	kitb	1:18780090-18809441	wt	Mo	OK	1.66248	0.572514	2.23499	-1.53795	-1.95907	0.0021	0.0285033	yes
ENSDARG00000056151	tyrp1b	1:18639899-18653111	wt	Mo	OK	5.0883	1.41308	6.50138	-1.84834	-4.13879	5e-05	0.00153795	yes
ENSDARG00000035986	ptpn2b	19:12443258-12473291	wt	Mo	OK	21.4856	15.0756	36.5612	-0.51115	-1.71594	0.003	0.0371513	yes
ENSDARG00000030092	tram2	20:47639162-47662909	wt	Mo	OK	52.2982	36.6736	88.9718	-0.512021	-1.69972	0.00355	0.0418993	yes
ENSDARG00000056314	a2ml	15:21178232-21303684	wt	Mo	OK	4.13603	1.47278	5.60881	-1.48971	-2.62603	5e-05	0.00153795	yes
ENSDARG00000056324	zgc:123295	3:21059217-21068196	wt	Mo	OK	6.39692	2.776	9.17292	-1.20437	-2.06921	0.00045	0.00927217	yes
ENSDARG00000056339	CABZ01009708.1	16:21686383-21723362	wt	Mo	OK	0.506245	2.11082	2.61706	2.05989	3.80769	5e-05	0.00153795	yes
ENSDARG00000056387	rnf17	9:29737883-29760485	wt	Mo	OK	1.00743	2.31364	3.32107	1.19948	3.08435	5e-05	0.00153795	yes
ENSDARG00000042851	srp9	20:36720927-36723690	wt	Mo	OK	103.119	72.2346	175.354	-0.513546	-1.77565	0.0015	0.0224044	yes
ENSDARG00000040401	slc25a20	22:132316-136657	wt	Mo	OK	25.8586	18.0984	43.957	-0.514783	-1.68659	0.0029	0.0362013	yes
ENSDARG00000017658	gmppb	22:39098244-39109671	wt	Mo	OK	61.007	42.6921	103.699	-0.515006	-1.7571	0.00235	0.0310825	yes
ENSDARG00000056618	xk	11:29571214-29586524	wt	Mo	OK	1.58715	0.738682	2.32583	-1.10341	-1.85544	0.00255	0.0330129	yes
ENSDARG00000056638	pir	11:29670438-29699753	wt	Mo	OK	2.60945	5.5534	8.16285	1.08963	2.03646	0.00065	0.0123928	yes
ENSDARG00000056656	tspan18a	7:26491764-26565989	wt	Mo	OK	3.69606	6.08193	9.77799	0.718542	1.79431	0.00175	0.0249821	yes
ENSDARG00000061328	cdon	18:44059597-44135697	wt	Mo	OK	38.1853	26.6915	64.8768	-0.516637	-1.67806	0.00335	0.0400082	yes
ENSDARG00000056838	pimr93	11:11813404-11821099	wt	Mo	OK	1.42626	0.790147	2.21641	-0.852048	-1.73904	0.0018	0.025441	yes
ENSDARG00000056913	pcolcea	10:22819880-22834379	wt	Mo	OK	3.42789	1.11581	4.5437	-1.61923	-3.38971	5e-05	0.00153795	yes
ENSDARG00000104359	anxa1c	5:64320766-64332739	wt	Mo	OK	579.263	404.902	984.165	-0.516645	-1.74111	0.00215	0.0289979	yes
ENSDARG00000016733	psat1	5:68713688-68727260	wt	Mo	OK	50.0441	34.9354	84.9795	-0.518511	-1.82032	0.0018	0.025441	yes
ENSDARG00000041051	mid1ip1a	9:30452441-30453669	wt	Mo	OK	39.5348	27.595	67.1298	-0.518714	-1.70231	0.0035	0.0414522	yes
ENSDARG00000057108	serpine3	9:24032014-24040109	wt	Mo	OK	2.75854	0.658003	3.41654	-2.06774	-2.56006	0.0003	0.00678651	yes
ENSDARG00000035890	fuca1.1	19:32908298-32913253	wt	Mo	OK	56.5658	39.4817	96.0475	-0.518747	-1.80743	0.00185	0.0258486	yes
ENSDARG00000057148	si:dkey-48n15.2	13:16130119-16147839	wt	Mo	OK	6.57977	3.28608	9.86585	-1.00167	-2.78064	5e-05	0.00153795	yes
ENSDARG00000057206	nmt1b	12:15624641-15633978	wt	Mo	OK	2.62065	1.41692	4.03757	-0.887163	-1.79597	0.00265	0.033897	yes
ENSDARG00000077516	RECQL4	19:2897386-2928587	wt	Mo	OK	8.10797	5.65809	13.7661	-0.519025	-1.72832	0.00255	0.0330129	yes
ENSDARG00000057276	iqca1	6:15635704-15766109	wt	Mo	OK	0.867199	1.8281	2.6953	1.07591	2.08209	0.0007	0.0130978	yes
ENSDARG00000017049	adsl	3:24076694-24088079	wt	Mo	OK	46.1223	32.1494	78.2717	-0.520671	-1.83151	0.0015	0.0224044	yes
ENSDARG00000057426	oard1	23:19286843-19299366	wt	Mo	OK	1.88497	5.12123	7.0062	1.44195	3.73203	5e-05	0.00153795	yes
ENSDARG00000057433	st6galnac5b	8:17764667-17786547	wt	Mo	OK	2.54724	0.87913	3.42637	-1.53479	-2.88906	5e-05	0.00153795	yes
ENSDARG00000057477	lrrc28	7:15369864-15408674	wt	Mo	OK	2.05036	3.15634	5.2067	0.622374	1.76701	0.0029	0.0362013	yes
ENSDARG00000057575	pnp4a	11:24052513-24060085	wt	Mo	OK	1.47325	0.158497	1.63175	-3.21647	-3.44246	0.0008	0.0143865	yes
ENSDARG00000045815	mcm10	4:7842499-7861102	wt	Mo	OK	19.4599	13.5594	33.0193	-0.521212	-1.79588	0.0025	0.0325133	yes
ENSDARG00000071548	josd1	12:18784532-18791520	wt	Mo	OK	17.9548	12.5025	30.4573	-0.522154	-1.70849	0.003	0.0371513	yes
ENSDARG00000094744	si:ch211-113a14.15	25:35784227-35784648	wt	Mo	OK	2743.07	1909.33	4652.4	-0.52273	-1.86189	0.00145	0.0219063	yes
ENSDARG00000055996	rps8a	2:26842811-26846266	wt	Mo	OK	1940.05	1349.22	3289.27	-0.523975	-1.7255	0.00205	0.0279355	yes
ENSDARG00000057899	zgc:114081	23:16880865-16886689	wt	Mo	OK	3.02518	6.15377	9.17895	1.02445	2.07048	0.00045	0.00927217	yes
ENSDARG00000057918	tsc1b	21:17265153-17303196	wt	Mo	OK	3.53944	5.53431	9.07375	0.644882	2.08207	0.0005	0.0100956	yes
ENSDARG00000045352	cst14a.2	24:20776143-20777295	wt	Mo	OK	52.4682	36.3828	88.851	-0.528188	-1.68361	0.00315	0.0382609	yes
ENSDARG00000006370	atp6v1h	2:30803239-30863340	wt	Mo	OK	26.9309	18.671	45.6019	-0.528465	-1.74082	0.0027	0.0344593	yes
ENSDARG00000068409	vgll4l	8:31090031-31098305	wt	Mo	OK	23.9058	16.57	40.4758	-0.528793	-1.71068	0.0019	0.0263534	yes
ENSDARG00000058102	sardh	10:10429089-10603580	wt	Mo	OK	5.56953	1.612	7.18153	-1.7887	-4.60092	5e-05	0.00153795	yes
ENSDARG00000058160	tnfaip2b	13:7109820-7121500	wt	Mo	OK	4.12702	2.46594	6.59296	-0.742964	-1.86493	0.00175	0.0249821	yes
ENSDARG00000054616	cldni	3:30790403-30795479	wt	Mo	OK	160.317	110.874	271.191	-0.532007	-1.87136	0.0012	0.0191619	yes
ENSDARG00000078550	zgc:194839	8:32792602-32795982	wt	Mo	OK	26.5146	18.3354	44.85	-0.532157	-1.74586	0.0019	0.0263534	yes
ENSDARG00000037361	kdelr2b	12:947208-954562	wt	Mo	OK	40.7941	28.1824	68.9765	-0.533567	-1.82561	0.0016	0.0233674	yes
ENSDARG00000055678	akap12b	20:26509746-26568217	wt	Mo	OK	221.342	152.709	374.051	-0.535492	-1.72654	0.002	0.0274731	yes
ENSDARG00000025254	s100a10b	16:23482752-23484452	wt	Mo	OK	136.62	94.2402	230.86	-0.535752	-1.73553	0.0025	0.0325133	yes
ENSDARG00000056594	irx1b	19:28543430-28546443	wt	Mo	OK	19.813	13.6631	33.4761	-0.53616	-1.75373	0.0027	0.0344593	yes
ENSDARG00000058587	ccdc79	18:7497661-7520219	wt	Mo	OK	2.7878	1.4505	4.2383	-0.942576	-2.49903	5e-05	0.00153795	yes
ENSDARG00000058679	zgc:114104	21:11428534-11436742	wt	Mo	OK	4.08732	1.90379	5.99111	-1.10228	-2.83006	5e-05	0.00153795	yes
ENSDARG00000061235	alg5	10:35040750-35058871	wt	Mo	OK	46.751	32.2296	78.9806	-0.536611	-1.85755	0.00105	0.0175705	yes
ENSDARG00000063701	rreb1a	24:2350528-2454270	wt	Mo	OK	8.82883	6.07286	14.9017	-0.539847	-1.46092	0.00315	0.0382609	yes
ENSDARG00000058775	SLC22A3	17:6173586-6191620	wt	Mo	OK	2.94484	4.63981	7.58465	0.655875	1.83	0.0023	0.0305868	yes
ENSDARG00000043873	arid4a	17:11223903-11264487	wt	Mo	OK	25.5396	17.5604	43.1	-0.540411	-1.75408	0.0029	0.0362013	yes
ENSDARG00000055120	ctsba	17:32670419-32684022	wt	Mo	OK	98.9813	68.0287	167.01	-0.541012	-1.83839	0.0009	0.0156103	yes
ENSDARG00000017842	syvn1	14:26154634-26167624	wt	Mo	OK	19.3247	13.2815	32.6062	-0.541028	-1.83746	0.00125	0.0197028	yes
ENSDARG00000075735	cxxc5b	14:7626694-7661314	wt	Mo	OK	14.1453	9.7215	23.8668	-0.54107	-1.83462	0.0014	0.0213775	yes
ENSDARG00000008723	prkcba	1:8320607-8380801	wt	Mo	OK	8.50599	5.83165	14.3376	-0.544576	-1.65432	0.00385	0.0441897	yes
ENSDARG00000059059	emsy	10:284302-302856	wt	Mo	OK	3.17376	5.46076	8.63452	0.782909	2.33703	0.0001	0.00278989	yes
ENSDARG00000058358	krt8	23:10314655-10319318	wt	Mo	OK	774.787	531.183	1305.97	-0.544591	-1.76206	0.00185	0.0258486	yes
ENSDARG00000070386	krtcap2	16:23468283-23473587	wt	Mo	OK	77.8918	53.3906	131.282	-0.544885	-1.83627	0.0016	0.0233674	yes
ENSDARG00000079508	fam114a2	21:37738207-37750421	wt	Mo	OK	12.3088	8.43332	20.7421	-0.545518	-1.70189	0.0031	0.0379229	yes
ENSDARG00000059557	xylt2	3:59886577-59937322	wt	Mo	OK	3.83651	5.45648	9.29299	0.508177	1.63675	0.00405	0.0458696	yes
ENSDARG00000059699	DNAJC16 (1 of many)	23:37380014-37411849	wt	Mo	OK	0.479569	1.94442	2.42399	2.01953	3.19106	5e-05	0.00153795	yes
ENSDARG00000059775	slc32a1	6:60147712-60152730	wt	Mo	OK	0.513728	1.2083	1.72203	1.23391	2.46125	0.0001	0.00278989	yes
ENSDARG00000101914	metrnl	3:44328047-44344245	wt	Mo	OK	12.4931	8.55342	21.0465	-0.546557	-1.64588	0.0041	0.0462521	yes
ENSDARG00000037000	fkbp11	6:7271443-7281620	wt	Mo	OK	103.927	71.1308	175.058	-0.547022	-1.86414	0.0012	0.0191619	yes
ENSDARG00000060096	tbc1d10ab	10:8578470-8617716	wt	Mo	OK	5.6883	3.63224	9.32054	-0.647139	-1.75397	0.0021	0.0285033	yes
ENSDARG00000054867	hibch	9:41072406-41123156	wt	Mo	OK	21.4187	14.6547	36.0734	-0.547502	-1.83496	0.0012	0.0191619	yes
ENSDARG00000060126	acyp1	17:50165373-50168954	wt	Mo	OK	0.362482	1.42651	1.78899	1.97651	2.66385	0.00035	0.0076251	yes
ENSDARG00000060280	pde9a	9:19610726-19666379	wt	Mo	OK	1.55268	0.712732	2.26541	-1.12333	-1.73492	0.0031	0.0379229	yes
ENSDARG00000007818	palm1b	2:26581687-26628611	wt	Mo	OK	10.1936	6.97314	17.1667	-0.547787	-1.70431	0.0024	0.0315002	yes
ENSDARG00000060366	slc12a9	5:37615770-37648309	wt	Mo	OK	2.24798	3.62205	5.87003	0.688174	1.95725	0.0009	0.0156103	yes
ENSDARG00000061691	qpctla	18:37238131-37253688	wt	Mo	OK	13.9411	9.52464	23.4657	-0.549605	-1.80113	0.00155	0.0227929	yes
ENSDARG00000060683	lrsam1	5:32265011-32282445	wt	Mo	OK	5.85981	3.59045	9.45026	-0.70669	-2.0109	0.00075	0.0137623	yes
ENSDARG00000060711	sv2bb	25:10941650-10992043	wt	Mo	OK	1.57826	0.722522	2.30078	-1.12722	-2.26389	0.0004	0.00842463	yes
ENSDARG00000060753	pear1	16:30480113-30561327	wt	Mo	OK	0.377522	0.771638	1.14916	1.03137	1.95524	0.00115	0.0186952	yes
ENSDARG00000060845	antxr1d	13:31166479-31205507	wt	Mo	OK	2.25978	3.99952	6.2593	0.823648	1.73953	0.00265	0.033897	yes
ENSDARG00000060862	atxn1b	16:25640276-25653480	wt	Mo	OK	0.568667	1.62791	2.19658	1.51736	3.97573	5e-05	0.00153795	yes
ENSDARG00000014572	chpt1	4:17718031-17736032	wt	Mo	OK	30.5878	20.878	51.4658	-0.550973	-1.94378	0.0007	0.0130978	yes
ENSDARG00000079308	tor3a	8:16561426-16573292	wt	Mo	OK	10.9173	7.44694	18.3642	-0.551902	-1.68545	0.0042	0.0471006	yes
ENSDARG00000061006	cyb5d2	5:30431995-30435045	wt	Mo	OK	3.00405	1.20303	4.20708	-1.32024	-2.15602	0.00105	0.0175705	yes
ENSDARG00000061017	spns2	5:30180446-30324225	wt	Mo	OK	5.28265	2.62523	7.90788	-1.00882	-2.21599	5e-05	0.00153795	yes
ENSDARG00000004492	pcyt1ab	18:46011155-46022120	wt	Mo	OK	12.0709	8.21971	20.2906	-0.554374	-1.7047	0.0037	0.0429874	yes
ENSDARG00000089908	si:ch211-265o23.1	4:26047583-26060691	wt	Mo	OK	13.2396	9.01132	22.2509	-0.55505	-1.83709	0.00115	0.0186952	yes
ENSDARG00000069099	tmco1	8:21072421-21078161	wt	Mo	OK	42.0632	28.629	70.6922	-0.555083	-1.85415	0.0015	0.0224044	yes
ENSDARG00000007219	actn1	13:36195255-36265670	wt	Mo	OK	38.0909	25.9236	64.0145	-0.555182	-1.9194	0.0004	0.00842463	yes
ENSDARG00000061259	sost	12:27239963-27244292	wt	Mo	OK	2.33895	0.754278	3.09323	-1.63269	-3.25468	5e-05	0.00153795	yes
ENSDARG00000016357	fmo5	20:15184947-15205206	wt	Mo	OK	41.5847	28.274	69.8587	-0.55658	-1.77117	0.00215	0.0289979	yes
ENSDARG00000061303	oca2	6:37881001-38060286	wt	Mo	OK	1.21768	0.446245	1.66393	-1.44822	-2.00845	0.0012	0.0191619	yes
ENSDARG00000008363	mcl1b	16:29651325-29656830	wt	Mo	OK	67.5642	45.8521	113.416	-0.559273	-1.87974	0.00115	0.0186952	yes
ENSDARG00000017299	fabp11a	19:32579388-32581848	wt	Mo	OK	157.504	106.883	264.387	-0.559362	-1.96634	0.0007	0.0130978	yes
ENSDARG00000061439	ugt5c3	18:40481633-40487673	wt	Mo	OK	2.32543	4.35838	6.68381	0.906298	2.39219	0.0001	0.00278989	yes
ENSDARG00000056122	gdi1	23:26136607-26150497	wt	Mo	OK	31.2516	21.1759	52.4275	-0.561508	-2.01382	0.0005	0.0100956	yes
ENSDARG00000026829	cotl1	18:13235318-13248160	wt	Mo	OK	74.7253	50.6241	125.349	-0.561773	-1.96593	0.00065	0.0123928	yes
ENSDARG00000006300	psmd9	7:71757230-71765097	wt	Mo	OK	77.854	52.6938	130.548	-0.563136	-1.94617	0.0009	0.0156103	yes
ENSDARG00000061909	si:ch73-233f7.1	14:2464272-2482033	wt	Mo	OK	0.859818	1.37998	2.2398	0.682545	1.83058	0.00195	0.0269377	yes
ENSDARG00000061963	vrtn	20:27850042-27855924	wt	Mo	OK	1.09486	2.49201	3.58687	1.18656	2.81985	5e-05	0.00153795	yes
ENSDARG00000005675	sec61a1l	6:42380374-42391072	wt	Mo	OK	77.4749	52.3828	129.858	-0.564637	-1.99383	0.0004	0.00842463	yes
ENSDARG00000105491	arhgef5	16:17707385-17730487	wt	Mo	OK	6.57844	4.44782	11.0263	-0.564646	-1.83229	0.0012	0.0191619	yes
ENSDARG00000062040	atp8b5a	5:18740498-18792646	wt	Mo	OK	5.6655	3.85308	9.51858	-0.556192	-1.7372	0.00205	0.0279355	yes
ENSDARG00000102599	si:ch1073-392o20.2	8:52528894-52543349	wt	Mo	OK	10.0866	6.81715	16.9038	-0.565206	-1.84954	0.00145	0.0219063	yes
ENSDARG00000101423	cyp2y3	15:98231-104338	wt	Mo	OK	43.6592	29.5012	73.1604	-0.565512	-1.99113	0.0004	0.00842463	yes
ENSDARG00000062147	otc	9:30457293-30463666	wt	Mo	OK	6.19639	2.78084	8.97723	-1.15591	-2.48521	5e-05	0.00153795	yes
ENSDARG00000062217	kcnj3b	6:13042486-13075278	wt	Mo	OK	0.317539	0.987862	1.3054	1.63737	3.0425	5e-05	0.00153795	yes
ENSDARG00000062221	si:ch211-135f11.1	5:23384513-23406134	wt	Mo	OK	2.77774	1.24291	4.02065	-1.16019	-2.86045	5e-05	0.00153795	yes
ENSDARG00000062272	afg3l2	2:21794686-21811838	wt	Mo	OK	3.13103	4.93253	8.06356	0.655691	1.89241	0.0011	0.018176	yes
ENSDARG00000062297	soat1	8:14848746-14872518	wt	Mo	OK	0.920239	0.310146	1.23039	-1.56906	-1.93544	0.00255	0.0330129	yes
ENSDARG00000062352	sema4ab	19:24741295-24807944	wt	Mo	OK	4.02047	5.78467	9.80514	0.524868	1.72839	0.00315	0.0382609	yes
ENSDARG00000057218	tbc1d15	18:17013097-17031165	wt	Mo	OK	11.1516	7.53412	18.6857	-0.565739	-1.78336	0.00185	0.0258486	yes
ENSDARG00000103841	CU024870.1	25:23392430-23397900	wt	Mo	OK	11.6875	7.89528	19.5828	-0.5659	-1.97052	0.0005	0.0100956	yes
ENSDARG00000102200	man2a1	5:56335620-56534135	wt	Mo	OK	14.6089	9.86512	24.474	-0.566437	-1.94505	0.00065	0.0123928	yes
ENSDARG00000062481	mlphb	9:24198143-24212500	wt	Mo	OK	3.43189	0.414635	3.84653	-3.04909	-3.40615	5e-05	0.00153795	yes
ENSDARG00000062519	abcc13	24:23896519-23915552	wt	Mo	OK	1.75106	3.35386	5.10492	0.937594	1.67222	0.0045	0.0495232	yes
ENSDARG00000062542	fgf12b	15:45391444-45492160	wt	Mo	OK	2.52119	4.11557	6.63676	0.706991	2.07729	0.0003	0.00678651	yes
ENSDARG00000062562	egln2	15:8359528-8406926	wt	Mo	OK	1.19433	0.464686	1.65902	-1.36188	-2.61918	5e-05	0.00153795	yes
ENSDARG00000062632	duox	25:31547310-31608285	wt	Mo	OK	0.44988	0.901998	1.35188	1.00358	2.05727	0.00105	0.0175705	yes
ENSDARG00000005652	man1a1	20:41123943-41345528	wt	Mo	OK	7.26226	4.89802	12.1603	-0.56822	-1.95998	0.001	0.0168992	yes
ENSDARG00000062750	si:ch73-74h11.1	20:17049103-17072768	wt	Mo	OK	4.38808	2.64153	7.02961	-0.732216	-2.08102	0.0004	0.00842463	yes
ENSDARG00000075297	trnt1	6:43228258-43236164	wt	Mo	OK	17.5776	11.8541	29.4317	-0.568354	-1.85195	0.00095	0.0162469	yes
ENSDARG00000037852	zgc:101663	23:358018-381744	wt	Mo	OK	9.65022	6.5021	16.1523	-0.569656	-1.76327	0.0023	0.0305868	yes
ENSDARG00000017571	mccc2	5:43208684-43219510	wt	Mo	OK	70.7338	47.6553	118.389	-0.569764	-1.51474	0.00055	0.0108993	yes
ENSDARG00000011605	dennd6b	4:20081780-20092654	wt	Mo	OK	7.65225	5.15425	12.8065	-0.570123	-1.7527	0.0028	0.0353922	yes
ENSDARG00000105384	si:dkey-23a13.22	7:5856059-5857076	wt	Mo	OK	450.887	303.358	754.245	-0.571745	-2.02801	0.0003	0.00678651	yes
ENSDARG00000098970	si:dkey-23a13.10	7:5791382-5791882	wt	Mo	OK	146.078	98.2355	244.314	-0.57242	-1.88623	0.0011	0.018176	yes
ENSDARG00000001873	phgdh	9:48488540-48516821	wt	Mo	OK	65.826	44.2155	110.041	-0.574104	-2.07681	0.0003	0.00678651	yes
ENSDARG00000063307	sgsm2	15:20608037-20708095	wt	Mo	OK	0.431734	0.934772	1.36651	1.11447	1.90579	0.0013	0.0202483	yes
ENSDARG00000061413	sec23ip	13:25418973-25435858	wt	Mo	OK	8.27252	5.54889	13.8214	-0.576127	-1.83322	0.0015	0.0224044	yes
ENSDARG00000063314	apba2a	25:31501191-31530807	wt	Mo	OK	1.51075	2.71825	4.229	0.84741	2.11862	0.0003	0.00678651	yes
ENSDARG00000087093	si:ch211-157c3.4	3:27511235-27532605	wt	Mo	OK	138.83	93.1019	231.932	-0.576437	-1.70011	0.00345	0.0409451	yes
ENSDARG00000063407	CABZ01052815.1	16:1275706-1294474	wt	Mo	OK	1.95267	4.28853	6.2412	1.13503	2.70309	5e-05	0.00153795	yes
ENSDARG00000024602	zgc:162964	17:33422957-33434079	wt	Mo	OK	11.2799	7.5365	18.8164	-0.58179	-1.71751	0.00285	0.0357599	yes
ENSDARG00000063518	zgc:153913	2:50629-53978	wt	Mo	OK	3.12618	0.728012	3.85419	-2.10237	-4.13594	5e-05	0.00153795	yes
ENSDARG00000055899	lzic	23:29643351-29648203	wt	Mo	OK	22.406	14.9618	37.3678	-0.582604	-1.78882	0.0016	0.0233674	yes
ENSDARG00000033789	ndufb7	1:55102476-55108071	wt	Mo	OK	84.2372	56.2387	140.476	-0.582894	-1.90071	0.00095	0.0162469	yes
ENSDARG00000067567	SLC6A13	25:1710155-1736007	wt	Mo	OK	0.796617	0.386568	1.18318	-1.04316	-1.74878	0.00405	0.0458696	yes
ENSDARG00000067672	card9	5:50510223-50519640	wt	Mo	OK	2.23086	0.944601	3.17546	-1.23982	-2.5156	0.0001	0.00278989	yes
ENSDARG00000045437	slc35b3	24:8348710-8367947	wt	Mo	OK	17.9309	11.9706	29.9015	-0.582953	-1.85717	0.00115	0.0186952	yes
ENSDARG00000077620	cdca7a	9:2873742-2886230	wt	Mo	OK	140.929	94.0807	235.01	-0.582997	-2.11742	0.0001	0.00278989	yes
ENSDARG00000009978	icn	16:23516156-23517520	wt	Mo	OK	509.297	339.949	849.246	-0.583189	-2.0403	0.00035	0.0076251	yes
ENSDARG00000068232	cbln12	2:38139086-38143329	wt	Mo	OK	0.317489	1.493	1.81049	2.23343	2.4992	0.00185	0.0258486	yes
ENSDARG00000037064	galca	20:4726848-4750537	wt	Mo	OK	6.07966	4.05682	10.1365	-0.583641	-1.70463	0.0032	0.0387033	yes
ENSDARG00000038242	zgc:113333	3:18591209-18606336	wt	Mo	OK	25.7097	17.131	42.8407	-0.585699	-1.67959	0.00425	0.0475056	yes
ENSDARG00000068456	tmem91	18:36033653-36065354	wt	Mo	OK	1.24199	0.10363	1.34562	-3.58314	-0.94425	0.0025	0.0325133	yes
ENSDARG00000068995	zgc:101846	10:29930340-29931249	wt	Mo	OK	183.007	121.927	304.934	-0.585882	-2.11343	0.0003	0.00678651	yes
ENSDARG00000105397	si:dkey-23a13.8	7:5788819-5789342	wt	Mo	OK	209.194	139.348	348.542	-0.58615	-2.00699	0.0006	0.0117405	yes
ENSDARG00000075622	zgc:174938	16:46601637-46606118	wt	Mo	OK	65.1404	43.2928	108.433	-0.589425	-1.92876	0.0012	0.0191619	yes
ENSDARG00000068833	dclre1b	8:24087219-24092336	wt	Mo	OK	6.10258	3.83018	9.93276	-0.672007	-1.88556	0.0012	0.0191619	yes
ENSDARG00000068849	fam83ha	13:42438605-42453377	wt	Mo	OK	0.862292	0.438093	1.30038	-0.976939	-2.17776	0.0003	0.00678651	yes
ENSDARG00000019417	gadd45ga	8:31358434-31359929	wt	Mo	OK	17.3953	11.5593	28.9546	-0.589647	-1.69116	0.0034	0.0405204	yes
ENSDARG00000055283	id2a	17:34857950-34860219	wt	Mo	OK	69.3232	46.0618	115.385	-0.589767	-2.04346	0.0003	0.00678651	yes
ENSDARG00000068947	si:ch211-264e16.1	18:15735207-15750634	wt	Mo	OK	4.64119	2.19094	6.83213	-1.08294	-2.91771	5e-05	0.00153795	yes
ENSDARG00000068966	si:ch211-261n11.7	8:22456850-22468746	wt	Mo	OK	1.75771	3.71849	5.4762	1.08102	1.70378	0.0036	0.0421982	yes
ENSDARG00000068974	lim2.1	10:30009934-30016825	wt	Mo	OK	4.27154	0.811387	5.08293	-2.39629	-2.21034	0.00015	0.00390457	yes
ENSDARG00000040110	kif20bb	12:16403764-16430481	wt	Mo	OK	34.9261	23.2064	58.1325	-0.589781	-2.10276	0.00035	0.0076251	yes
ENSDARG00000076169	pold3	21:21706962-21717994	wt	Mo	OK	83.1934	55.2719	138.465	-0.589923	-2.05562	0.00035	0.0076251	yes
ENSDARG00000015540	psen2	1:50405175-50418606	wt	Mo	OK	9.85677	6.54292	16.3997	-0.591181	-1.74437	0.00205	0.0279355	yes
ENSDARG00000078383	fam195b	3:59573807-59585761	wt	Mo	OK	30.3291	20.126	50.4551	-0.59164	-1.89289	0.00165	0.0238532	yes
ENSDARG00000069250	uacaa	18:20058307-20093811	wt	Mo	OK	2.85047	1.02474	3.87521	-1.47595	-3.14052	5e-05	0.00153795	yes
ENSDARG00000030972	dnaja1	1:44301667-44313131	wt	Mo	OK	27.7154	18.3429	46.0583	-0.595464	-1.81875	0.00065	0.0123928	yes
ENSDARG00000103915	ero1b	11:44240467-44262990	wt	Mo	OK	25.0405	16.5683	41.6088	-0.595837	-1.75397	0.0023	0.0305868	yes
ENSDARG00000069329	drgx	13:30781666-30787828	wt	Mo	OK	2.30519	0.654711	2.9599	-1.81596	-3.07966	5e-05	0.00153795	yes
ENSDARG00000069375	zgc:162608	15:21939812-21942264	wt	Mo	OK	2.17124	0.813102	2.98434	-1.41701	-1.96367	0.0008	0.0143865	yes
ENSDARG00000012929	eif2d	8:37415171-37429401	wt	Mo	OK	20.3121	13.4391	33.7512	-0.595906	-1.82001	0.00145	0.0219063	yes
ENSDARG00000101892	ino80e	16:10531933-10537997	wt	Mo	OK	10.9804	7.26431	18.2447	-0.596034	-1.93228	0.00075	0.0137623	yes
ENSDARG00000045092	cdk5rap3	12:28710891-28720244	wt	Mo	OK	25.6193	16.9471	42.5664	-0.596192	-1.99829	0.00075	0.0137623	yes
ENSDARG00000069439	ptgdsa	10:10830572-10838698	wt	Mo	OK	3.60201	1.59458	5.19659	-1.17563	-1.8134	0.0028	0.0353922	yes
ENSDARG00000039914	gapdhs	16:45077925-45103166	wt	Mo	OK	27.8926	18.4228	46.3154	-0.598387	-1.96797	0.0006	0.0117405	yes
ENSDARG00000069478	slc13a3	8:28658003-28685072	wt	Mo	OK	1.2611	0.581748	1.84285	-1.11621	-2.27002	0.0003	0.00678651	yes
ENSDARG00000069481	ghrh	11:15211018-15300860	wt	Mo	OK	0.376007	3.33676	3.71277	3.14962	3.43277	0.0003	0.00678651	yes
ENSDARG00000069515	bbs10	18:7416987-7423068	wt	Mo	OK	1.78703	4.52771	6.31474	1.34122	1.80002	0.00235	0.0310825	yes
ENSDARG00000038475	acy1	22:36772139-36852888	wt	Mo	OK	11.0263	7.26339	18.2897	-0.602232	-1.68369	0.0028	0.0353922	yes
ENSDARG00000010098	pank1b	12:16831540-16842966	wt	Mo	OK	15.9084	10.4786	26.387	-0.602341	-2.04366	0.00065	0.0123928	yes
ENSDARG00000041339	zgc:92380	9:48309685-48342569	wt	Mo	OK	40.2985	26.5434	66.8419	-0.602377	-2.06288	0.0003	0.00678651	yes
ENSDARG00000069692	col7a1l	4:15890681-15967505	wt	Mo	OK	4.76307	2.01697	6.78004	-1.2397	-2.52527	5e-05	0.00153795	yes
ENSDARG00000069888	cldna	15:2691993-2693936	wt	Mo	OK	1.91895	1.03128	2.95023	-0.895891	-1.77281	0.00375	0.0433328	yes
ENSDARG00000010250	nqo1	7:56401842-56420909	wt	Mo	OK	20.5967	13.5387	34.1354	-0.605321	-1.78021	0.0019	0.0263534	yes
ENSDARG00000069934	parp4	9:20672981-20690841	wt	Mo	OK	1.05585	0.399388	1.45524	-1.40254	-3.08693	5e-05	0.00153795	yes
ENSDARG00000070083	atp5b	11:13150238-13155400	wt	Mo	OK	497.743	326.787	824.53	-0.607051	-2.09249	0.00035	0.0076251	yes
ENSDARG00000015088	dnajb11	9:32830279-32837979	wt	Mo	OK	31.1247	20.434	51.5587	-0.607087	-2.12201	0.00035	0.0076251	yes
ENSDARG00000069988	arid5b	21:11151364-11159187	wt	Mo	OK	0.222733	1.17219	1.39492	2.39582	2.87013	5e-05	0.00153795	yes
ENSDARG00000070000	txnipb	16:42965295-42968883	wt	Mo	OK	0.783251	5.22613	6.00938	2.7382	5.46656	5e-05	0.00153795	yes
ENSDARG00000101105	CR382372.1	4:29340386-29350323	wt	Mo	OK	6.06897	3.98352	10.0525	-0.607405	-1.88693	0.00095	0.0162469	yes
ENSDARG00000070050	sfrp2	1:24800494-24805304	wt	Mo	OK	2.11808	0.549188	2.66727	-1.94739	-2.73659	0.0004	0.00842463	yes
ENSDARG00000062025	cpox	8:18566029-18582931	wt	Mo	OK	14.7328	9.66858	24.4014	-0.607654	-1.93897	0.0009	0.0156103	yes
ENSDARG00000088768	PQLC1	19:11488960-11574452	wt	Mo	OK	9.16992	6.01697	15.1869	-0.607873	-1.8923	0.0011	0.018176	yes
ENSDARG00000004023	isl1	5:40128459-40133892	wt	Mo	OK	14.6755	9.61297	24.2885	-0.61035	-1.98438	0.00035	0.0076251	yes
ENSDARG00000070165	tnfrsf1b	11:40167483-40193180	wt	Mo	OK	2.05127	3.53733	5.5886	0.786145	1.82878	0.00205	0.0279355	yes
ENSDARG00000073723	zgc:194679	7:56375647-56381503	wt	Mo	OK	11.3168	7.40212	18.7189	-0.612459	-1.97621	0.00065	0.0123928	yes
ENSDARG00000070214	slc41a1	11:37681633-37730214	wt	Mo	OK	0.846656	0.389967	1.23662	-1.11843	-1.96474	0.00145	0.0219063	yes
ENSDARG00000070272	casp8l2	9:1336894-1356460	wt	Mo	OK	1.9982	5.54483	7.54303	1.47244	1.81469	0.00175	0.0249821	yes
ENSDARG00000074002	slc6a11a	6:40631529-40648667	wt	Mo	OK	9.13639	5.95773	15.0941	-0.61686	-1.86153	0.00115	0.0186952	yes
ENSDARG00000030465	tmem263	18:15293018-15300595	wt	Mo	OK	43.2045	28.1583	71.3628	-0.617619	-2.20134	5e-05	0.00153795	yes
ENSDARG00000070331	muc5.1	25:8279638-8323098	wt	Mo	OK	0.051009	0.884483	0.935492	4.11601	2.82617	5e-05	0.00153795	yes
ENSDARG00000070341	or134-1	6:52861165-52863192	wt	Mo	OK	0.524393	1.15587	1.68026	1.14026	1.85861	0.00225	0.0300621	yes
ENSDARG00000044241	dram2b	22:818829-849298	wt	Mo	OK	10.7984	7.03493	17.8333	-0.618204	-1.82113	0.00135	0.0208938	yes
ENSDARG00000008403	phospho1	3:15656116-15661237	wt	Mo	OK	15.0817	9.8058	24.8875	-0.621088	-1.94337	0.0007	0.0130978	yes
ENSDARG00000070430	chtopb	16:28946611-28952539	wt	Mo	OK	0.364969	1.67222	2.03719	2.19592	2.99128	5e-05	0.00153795	yes
ENSDARG00000040925	wnt10b	23:27714929-27721228	wt	Mo	OK	8.86418	5.75042	14.6146	-0.624319	-1.70554	0.00365	0.042522	yes
ENSDARG00000044588	emp2	3:26896938-26927193	wt	Mo	OK	37.9223	24.6002	62.5225	-0.624377	-2.22493	5e-05	0.00153795	yes
ENSDARG00000070604	zgc:162509	16:14075802-14086815	wt	Mo	OK	0.288944	0.817363	1.10631	1.50019	2.24443	0.00055	0.0108993	yes
ENSDARG00000070618	tatdn2	6:40442385-40457573	wt	Mo	OK	0.437692	2.25173	2.68942	2.36304	2.15149	0.00285	0.0357599	yes
ENSDARG00000079762	si:dkey-253d23.4	22:9841555-9848818	wt	Mo	OK	23.5317	15.2637	38.7954	-0.624504	-1.85568	0.0014	0.0213775	yes
ENSDARG00000028618	zgc:77517	6:39362840-39367931	wt	Mo	OK	21.8551	14.1621	36.0172	-0.625931	-2.02365	0.0007	0.0130978	yes
ENSDARG00000013670	hyou1	10:29883779-29905126	wt	Mo	OK	42.1809	27.332	69.5129	-0.625999	-2.04778	5e-05	0.00153795	yes
ENSDARG00000070734	dyrk4	25:16689529-16736502	wt	Mo	OK	0.297593	1.04254	1.34013	1.80869	1.61799	0.00045	0.00927217	yes
ENSDARG00000093760	si:ch211-197h24.9	16:27669115-27674549	wt	Mo	OK	8.22475	5.32851	13.5533	-0.62624	-1.82283	0.0012	0.0191619	yes
ENSDARG00000055592	capn2b	22:26308165-26334019	wt	Mo	OK	28.0744	18.1852	46.2596	-0.626486	-2.1032	0.0004	0.00842463	yes
ENSDARG00000063126	gusb	5:1800936-1846705	wt	Mo	OK	15.5438	10.059	25.6028	-0.627853	-2.17538	0.0002	0.00492144	yes
ENSDARG00000077306	cutc	13:542990-548515	wt	Mo	OK	13.075	8.45173	21.5267	-0.629489	-1.73556	0.00275	0.0349929	yes
ENSDARG00000071029	si:dkey-147f3.4	23:17002162-17019098	wt	Mo	OK	6.65017	2.69002	9.34019	-1.30577	-1.90286	0.00125	0.0197028	yes
ENSDARG00000071325	cbarpb	22:18761818-18800020	wt	Mo	OK	0.711703	1.88317	2.59487	1.40382	2.60709	5e-05	0.00153795	yes
ENSDARG00000071341	abch1	17:24518783-24546276	wt	Mo	OK	1.65597	0.917768	2.57374	-0.851473	-1.72087	0.00335	0.0400082	yes
ENSDARG00000074790	c23h20orf24	23:2962503-2969597	wt	Mo	OK	98.4419	63.5625	162.004	-0.631096	-2.23836	0.0001	0.00278989	yes
ENSDARG00000051762	DNAJA4	25:33833849-33842488	wt	Mo	OK	10.3568	6.67862	17.0354	-0.63295	-1.69686	0.0033	0.0396324	yes
ENSDARG00000071450	tdrd5	22:17235607-17254453	wt	Mo	OK	0.471418	1.3711	1.84252	1.54025	2.98066	5e-05	0.00153795	yes
ENSDARG00000071491	nrros	24:28331803-28340655	wt	Mo	OK	0.876569	0.382283	1.25885	-1.19723	-1.84355	0.00195	0.0269377	yes
ENSDARG00000019360	sec23b	6:6579755-6639184	wt	Mo	OK	25.9063	16.6914	42.5977	-0.6342	-1.4331	0.0018	0.025441	yes
ENSDARG00000071583	gtf3ab	24:21495460-21497684	wt	Mo	OK	0.344897	1.7504	2.0953	2.34345	2.85768	0.0006	0.0117405	yes
ENSDARG00000071590	si:ch211-236g6.1	22:9777184-9784454	wt	Mo	OK	5.07507	2.00787	7.08294	-1.33776	-2.49099	5e-05	0.00153795	yes
ENSDARG00000053493	aldh1a2	7:30055033-30096500	wt	Mo	OK	8.32874	5.36474	13.6935	-0.634589	-1.83434	0.00065	0.0123928	yes
ENSDARG00000022456	eno1a	23:22729925-22751447	wt	Mo	OK	8.0638	5.19315	13.2569	-0.634851	-1.72195	0.0019	0.0263534	yes
ENSDARG00000093584	zgc:193505	13:22545351-22547652	wt	Mo	OK	58.5477	37.696	96.2437	-0.6352	-1.86823	0.00175	0.0249821	yes
ENSDARG00000071648	zgc:113298	22:6290696-6347813	wt	Mo	OK	2.50266	0.952937	3.4556	-1.39301	-1.91375	0.00085	0.0149401	yes
ENSDARG00000099306	zgc:175088	11:41731443-41841731	wt	Mo	OK	142.518	91.6471	234.165	-0.636989	-1.76688	0.00315	0.0382609	yes
ENSDARG00000071692	prex2	24:18804245-19062637	wt	Mo	OK	1.67207	2.931	4.60307	0.80976	2.36002	0.0001	0.00278989	yes
ENSDARG00000071709	ppp1r9bb	12:9665328-9735645	wt	Mo	OK	1.02454	2.51899	3.54353	1.29787	2.91278	5e-05	0.00153795	yes
ENSDARG00000071823	adarb2	24:3505557-3751471	wt	Mo	OK	1.72528	3.10492	4.8302	0.847731	2.0595	0.00025	0.00588102	yes
ENSDARG00000073716	cpxm1a	13:9243492-9276920	wt	Mo	OK	1.68465	0.903418	2.58807	-0.898987	-1.84808	0.0027	0.0344593	yes
ENSDARG00000043154	ucp2	10:36706162-36738764	wt	Mo	OK	91.8037	58.9634	150.767	-0.638732	-2.15722	0.00025	0.00588102	yes
ENSDARG00000073784	FEZ2 (1 of many)	16:2582695-2595930	wt	Mo	OK	1.24422	3.1129	4.35712	1.32302	2.4612	0.00015	0.00390457	yes
ENSDARG00000073799	zgc:194210	16:31470560-31477093	wt	Mo	OK	2.34073	0.975656	3.31639	-1.26251	-1.74719	0.0008	0.0143865	yes
ENSDARG00000073810	thbs2b	12:30538144-30567025	wt	Mo	OK	1.07146	0.434924	1.50638	-1.30074	-1.44504	0.00335	0.0400082	yes
ENSDARG00000010244	rpl22l1	24:26330140-26334800	wt	Mo	OK	1279.95	821.029	2100.98	-0.640587	-2.27281	0.0001	0.00278989	yes
ENSDARG00000058800	rab25a	19:7495016-7501942	wt	Mo	OK	7.6363	4.89765	12.534	-0.640783	-1.76912	0.00245	0.0320091	yes
ENSDARG00000068851	rnf183	15:35028510-35034726	wt	Mo	OK	7.48788	4.80173	12.2896	-0.641003	-1.69218	0.00395	0.0450053	yes
ENSDARG00000074024	si:ch211-152n14.4	6:19444280-19448656	wt	Mo	OK	1.33443	0.56082	1.89525	-1.25062	-1.66714	0.0026	0.0335333	yes
ENSDARG00000070479	tspan13b	19:30800668-30811898	wt	Mo	OK	11.0901	7.1005	18.1906	-0.643282	-1.87572	0.0014	0.0213775	yes
ENSDARG00000074169	gpam	12:31379927-31419188	wt	Mo	OK	3.67768	5.67666	9.35434	0.626247	1.99499	0.00025	0.00588102	yes
ENSDARG00000074258	GRAMD1B (1 of many)	18:46842583-47026438	wt	Mo	OK	0.973008	0.236871	1.20988	-2.03835	-3.31124	5e-05	0.00153795	yes
ENSDARG00000097824	smco4	15:41280850-41288566	wt	Mo	OK	16.1043	10.2987	26.403	-0.644979	-1.82558	0.0013	0.0202483	yes
ENSDARG00000036820	mgll	8:26273420-26307362	wt	Mo	OK	22.8511	14.6113	37.4624	-0.645178	-2.2067	5e-05	0.00153795	yes
ENSDARG00000104181	TMSB15A	14:11760680-11765665	wt	Mo	OK	179.643	114.57	294.213	-0.648903	-2.22044	0.0002	0.00492144	yes
ENSDARG00000044261	si:ch211-243g18.2	10:9716738-9737507	wt	Mo	OK	66.7857	42.5323	109.318	-0.650981	-1.77233	0.00165	0.0238532	yes
ENSDARG00000074466	gdpd3a	3:26062720-26073996	wt	Mo	OK	5.68477	2.99988	8.68465	-0.922199	-2.18245	0.0001	0.00278989	yes
ENSDARG00000013961	slc31a1	5:56658317-56684698	wt	Mo	OK	14.7482	9.36489	24.1131	-0.655202	-2.27047	0.0001	0.00278989	yes
ENSDARG00000074622	myo5ab	25:7438092-7475262	wt	Mo	OK	0.701903	1.57203	2.27393	1.16329	2.84433	5e-05	0.00153795	yes
ENSDARG00000074626	pidd1	25:4380760-4403558	wt	Mo	OK	1.85695	3.06835	4.9253	0.724529	1.84415	0.0022	0.0295325	yes
ENSDARG00000074639	CABZ01090749.1	24:56415-69612	wt	Mo	OK	0.923748	2.1725	3.09625	1.23378	2.46555	0.00025	0.00588102	yes
ENSDARG00000031164	tuba8l2	1:4704670-4721311	wt	Mo	OK	60.9194	38.6795	99.5989	-0.655332	-2.25875	0.0002	0.00492144	yes
ENSDARG00000070480	agr2	19:30814137-30816783	wt	Mo	OK	32.8148	20.8033	53.6181	-0.657533	-2.06743	0.00035	0.0076251	yes
ENSDARG00000000442	slc39a13	7:32422739-32444869	wt	Mo	OK	13.3042	8.43155	21.7357	-0.65801	-2.17535	0.0002	0.00492144	yes
ENSDARG00000074690	ppm1j	6:48426606-48474935	wt	Mo	OK	0.448512	1.00908	1.45759	1.16983	2.12157	0.0007	0.0130978	yes
ENSDARG00000051857	tes	25:18378628-18400010	wt	Mo	OK	18.0099	11.4037	29.4136	-0.659281	-2.14209	0.0004	0.00842463	yes
ENSDARG00000074742	elmod3	8:44719228-44744650	wt	Mo	OK	1.96156	3.70672	5.66828	0.918144	1.99602	0.0007	0.0130978	yes
ENSDARG00000032116	cnot7	14:30073443-30084540	wt	Mo	OK	7.59235	4.80599	12.3983	-0.659713	-1.93043	0.00115	0.0186952	yes
ENSDARG00000074773	si:dkey-110g7.8	3:24071407-24074791	wt	Mo	OK	1.9901	0.845799	2.8359	-1.23445	-2.25464	0.0003	0.00678651	yes
ENSDARG00000079457	si:dkey-57h18.1	12:26447500-26468304	wt	Mo	OK	6.95615	4.39551	11.3517	-0.662257	-1.68724	0.0038	0.0437332	yes
ENSDARG00000070682	sdf4	23:24766991-24772859	wt	Mo	OK	30.5317	19.2806	49.8123	-0.663163	-2.30847	5e-05	0.00153795	yes
ENSDARG00000075016	apobb.2	20:53634247-53664835	wt	Mo	OK	5.59098	2.27861	7.86959	-1.29494	-4.01181	5e-05	0.00153795	yes
ENSDARG00000029071	creld2	4:27092683-27109997	wt	Mo	OK	11.7428	7.41333	19.1561	-0.663588	-1.84397	0.00085	0.0149401	yes
ENSDARG00000075264	FAM124A	9:24050468-24074157	wt	Mo	OK	0.481662	1.48666	1.96832	1.62598	2.29707	0.00015	0.00390457	yes
ENSDARG00000075271	rapgef5a	19:2834737-2858984	wt	Mo	OK	1.35652	0.629325	1.98584	-1.10803	-1.90677	0.0018	0.025441	yes
ENSDARG00000037655	pls3	14:13147112-13219444	wt	Mo	OK	74.6148	47.0763	121.691	-0.66446	-2.03329	0.00065	0.0123928	yes
ENSDARG00000104584	CABZ01050663.1	4:28644783-28651122	wt	Mo	OK	8.93388	5.63376	14.5676	-0.665189	-1.76992	0.00245	0.0320091	yes
ENSDARG00000075343	csf1a	11:23012132-23044168	wt	Mo	OK	0.947872	0.358982	1.30685	-1.40078	-2.19957	0.00045	0.00927217	yes
ENSDARG00000075397	cipca	17:44642481-44647815	wt	Mo	OK	1.12557	2.22575	3.35132	0.983633	1.94078	0.00155	0.0227929	yes
ENSDARG00000000804	rassf6	10:13251460-13277893	wt	Mo	OK	16.9765	10.6991	27.6756	-0.666049	-2.01451	0.0009	0.0156103	yes
ENSDARG00000075433	myom2a	11:11217474-11277249	wt	Mo	OK	2.06635	0.596624	2.66297	-1.79219	-1.39438	0.0044	0.0486418	yes
ENSDARG00000075436	sytl2b	15:19753142-19789200	wt	Mo	OK	4.96691	3.20537	8.17228	-0.631859	-1.93037	0.00065	0.0123928	yes
ENSDARG00000001414	mctp2a	18:23375174-23467233	wt	Mo	OK	8.09743	5.08782	13.1852	-0.670416	-1.91831	0.0012	0.0191619	yes
ENSDARG00000075517	si:ch211-120k19.1	16:17060704-17067287	wt	Mo	OK	1.63788	0.472683	2.11056	-1.79288	-2.87648	5e-05	0.00153795	yes
ENSDARG00000101143	VPS37B (1 of many)	10:45057063-45068310	wt	Mo	OK	11.2643	7.0753	18.3396	-0.670899	-1.76029	0.00275	0.0349929	yes
ENSDARG00000052170	uap1	6:35052810-35068789	wt	Mo	OK	12.2983	7.72011	20.0184	-0.671771	-1.6349	0.0043	0.0477834	yes
ENSDARG00000099776	glula	2:19339342-19343286	wt	Mo	OK	35.9279	22.533	58.4609	-0.673064	-1.90295	0.0005	0.0100956	yes
ENSDARG00000063177	manf	22:32274257-32280927	wt	Mo	OK	36.9473	23.1638	60.1111	-0.673593	-2.3139	0.0001	0.00278989	yes
ENSDARG00000059001	pim2	8:8889284-8895484	wt	Mo	OK	41.2457	25.8474	67.0931	-0.674224	-1.80893	0.00135	0.0208938	yes
ENSDARG00000075826	msh4	17:43775605-43806620	wt	Mo	OK	0.357308	0.81534	1.17265	1.19023	1.33474	0.00455	0.0498808	yes
ENSDARG00000075831	slc7a8a	7:23937453-23965207	wt	Mo	OK	5.0263	2.50192	7.52822	-1.00646	-3.12059	5e-05	0.00153795	yes
ENSDARG00000076025	dgkzb	25:7660489-7742378	wt	Mo	OK	3.29662	2.18708	5.4837	-0.591979	-1.80281	0.0018	0.025441	yes
ENSDARG00000021899	b4galt7	14:26082916-26094041	wt	Mo	OK	19.6581	12.3173	31.9754	-0.674435	-2.11077	0.00035	0.0076251	yes
ENSDARG00000008852	elp4	7:15654244-15781885	wt	Mo	OK	13.6727	8.56469	22.2374	-0.674824	-1.90661	0.00125	0.0197028	yes
ENSDARG00000097006	si:dkey-54h16.1	3:51162758-51191932	wt	Mo	OK	6.81783	4.26871	11.0865	-0.675512	-1.76336	0.002	0.0274731	yes
ENSDARG00000100718	me2	5:6233723-6281739	wt	Mo	OK	10.0859	6.3142	16.4001	-0.675672	-1.9419	0.0004	0.00842463	yes
ENSDARG00000094518	si:ch211-125e6.8	9:33305331-33310841	wt	Mo	OK	13.7386	8.59985	22.3385	-0.675852	-1.81021	0.0017	0.024452	yes
ENSDARG00000004771	ankrd10b	9:8951433-8989606	wt	Mo	OK	35.3409	22.0918	57.4327	-0.677827	-1.78661	0.00175	0.0249821	yes
ENSDARG00000076386	epdl1	7:890712-902359	wt	Mo	OK	1.06544	0.499292	1.56473	-1.09349	-1.77142	0.00325	0.0391971	yes
ENSDARG00000076426	dsg2l	2:2259810-2292533	wt	Mo	OK	1.97273	3.17633	5.14906	0.687167	1.85373	0.0014	0.0213775	yes
ENSDARG00000076484	stab1	22:10251737-10324699	wt	Mo	OK	1.72929	0.586609	2.3159	-1.55971	-4.19933	5e-05	0.00153795	yes
ENSDARG00000076547	si:ch211-221f10.2	14:23220864-23295599	wt	Mo	OK	0.811706	0.462365	1.27407	-0.811925	-1.72166	0.00375	0.0433328	yes
ENSDARG00000098622	ccne1	7:45747413-45757513	wt	Mo	OK	21.3401	13.3134	34.6535	-0.680684	-1.99429	0.00065	0.0123928	yes
ENSDARG00000098171	zgc:162193	15:14197043-14276820	wt	Mo	OK	21.1566	13.1989	34.3555	-0.680694	-1.91004	0.00125	0.0197028	yes
ENSDARG00000076833	atp1b1b	1:10036182-10055110	wt	Mo	OK	4.28027	2.37478	6.65505	-0.84991	-2.00384	0.00085	0.0149401	yes
ENSDARG00000076838	apom	2:42379322-42385143	wt	Mo	OK	7.68744	1.84424	9.53168	-2.05947	-3.40048	5e-05	0.00153795	yes
ENSDARG00000038243	e4f1	3:18564402-18587386	wt	Mo	OK	18.3298	11.4126	29.7424	-0.683569	-2.28016	5e-05	0.00153795	yes
ENSDARG00000076843	si:dkey-174i8.1	13:21973847-21984345	wt	Mo	OK	0.807503	2.60628	3.41378	1.69046	4.85849	5e-05	0.00153795	yes
ENSDARG00000045611	nfybb	25:28380749-28403743	wt	Mo	OK	10.2983	6.41183	16.7101	-0.683597	-1.87029	0.00115	0.0186952	yes
ENSDARG00000043482	B3GNT3 (1 of many)	8:13481062-13517646	wt	Mo	OK	15.3025	9.525	24.8275	-0.68398	-1.97731	0.00055	0.0108993	yes
ENSDARG00000101043	ppl	3:36317931-36340128	wt	Mo	OK	84.0435	52.254	136.297	-0.685595	-2.34811	5e-05	0.00153795	yes
ENSDARG00000078847	si:dkey-238o13.4	18:14703276-14709424	wt	Mo	OK	18.3618	11.4118	29.7736	-0.686176	-2.04405	0.00085	0.0149401	yes
ENSDARG00000035178	gna14	5:54873357-54890801	wt	Mo	OK	17.4907	10.8678	28.3585	-0.686531	-2.15994	5e-05	0.00153795	yes
ENSDARG00000018593	parp16	25:31457306-31471657	wt	Mo	OK	8.79553	5.46292	14.2584	-0.687097	-1.93686	0.0012	0.0191619	yes
ENSDARG00000013025	ints6	9:24014570-24030835	wt	Mo	OK	29.1622	18.1098	47.272	-0.687332	-2.47377	5e-05	0.00153795	yes
ENSDARG00000077169	si:ch211-153b23.4	14:11144483-11150710	wt	Mo	OK	3.40773	6.03832	9.44605	0.825338	2.41438	5e-05	0.00153795	yes
ENSDARG00000006786	copz2	3:23964032-23980864	wt	Mo	OK	12.8178	7.94997	20.7678	-0.689133	-2.04192	0.0004	0.00842463	yes
ENSDARG00000077229	ano8b	11:5967912-6004590	wt	Mo	OK	1.34041	2.29932	3.63973	0.778536	1.97105	0.00085	0.0149401	yes
ENSDARG00000077249	gmip	3:52482901-52547793	wt	Mo	OK	0.794453	0.320403	1.11486	-1.31007	-2.33586	0.00015	0.00390457	yes
ENSDARG00000062465	pgap1	9:24315241-24334979	wt	Mo	OK	12.2069	7.56784	19.7747	-0.689741	-2.26746	0.0002	0.00492144	yes
ENSDARG00000100712	si:dkey-19b23.12	7:20251375-20256803	wt	Mo	OK	29.3004	18.1558	47.4562	-0.690489	-2.02422	0.0005	0.0100956	yes
ENSDARG00000057714	cmah	4:2379440-2400951	wt	Mo	OK	12.6617	7.84142	20.5031	-0.691279	-2.11753	5e-05	0.00153795	yes
ENSDARG00000077403	col8a1a	9:30279909-30292032	wt	Mo	OK	0.99151	0.358332	1.34984	-1.46833	-2.26941	0.00085	0.0149401	yes
ENSDARG00000033285	gsto2	13:25266445-25272322	wt	Mo	OK	19.5168	12.0634	31.5802	-0.694085	-2.00085	0.00035	0.0076251	yes
ENSDARG00000037267	zgc:158263	23:26806690-26824737	wt	Mo	OK	7.53432	4.65228	12.1866	-0.69554	-2.04795	0.0002	0.00492144	yes
ENSDARG00000077545	BRSK1 (1 of many)	3:32162060-32189027	wt	Mo	OK	0.862863	0.476989	1.33985	-0.855175	-1.81673	0.0017	0.024452	yes
ENSDARG00000077559	CABZ01052290.1	16:55351721-55368199	wt	Mo	OK	2.05377	0.855641	2.90941	-1.2632	-2.82749	5e-05	0.00153795	yes
ENSDARG00000077567	angel1	17:52526596-52543831	wt	Mo	OK	1.81143	5.00505	6.81648	1.46626	3.45876	5e-05	0.00153795	yes
ENSDARG00000043457	gapdh	16:17284686-17292143	wt	Mo	OK	78.4217	48.3568	126.779	-0.697533	-2.42773	5e-05	0.00153795	yes
ENSDARG00000077654	grm8a	4:3464721-3727719	wt	Mo	OK	0.842503	0.20469	1.04719	-2.04124	-1.89091	0.0013	0.0202483	yes
ENSDARG00000077712	zgc:113886	17:49932199-49992665	wt	Mo	OK	0.992773	1.94335	2.93612	0.969008	1.77006	0.00225	0.0300621	yes
ENSDARG00000077775	zgc:193681	16:52885413-52892541	wt	Mo	OK	0.302264	0.981501	1.28376	1.69918	2.41389	0.00075	0.0137623	yes
ENSDARG00000055504	si:ch211-212k18.7	7:19230115-19239659	wt	Mo	OK	6.8687	4.23518	11.1039	-0.697613	-1.57752	0.00275	0.0349929	yes
ENSDARG00000103271	pla2g15	25:13592659-13607426	wt	Mo	OK	11.5892	7.13374	18.7229	-0.700047	-2.18382	0.00015	0.00390457	yes
ENSDARG00000069377	si:dkey-242g16.2	10:18029853-18031345	wt	Mo	OK	9.44313	5.80403	15.2472	-0.702211	-1.69907	0.00365	0.042522	yes
ENSDARG00000078068	abcg4b	15:23552464-23572949	wt	Mo	OK	0.9098	0.276403	1.1862	-1.71878	-1.50897	0.00135	0.0208938	yes
ENSDARG00000104285	zgc:63733	22:35037693-35087777	wt	Mo	OK	20.4198	12.5302	32.95	-0.704557	-2.30633	5e-05	0.00153795	yes
ENSDARG00000078185	pacs2	13:36320155-36400412	wt	Mo	OK	2.73454	1.56657	4.30111	-0.803687	-1.99385	0.00085	0.0149401	yes
ENSDARG00000078211	espnla	6:27313941-27364796	wt	Mo	OK	0.327046	0.861799	1.18884	1.39786	2.06593	0.00185	0.0258486	yes
ENSDARG00000078259	bnip1a	14:23951145-23953812	wt	Mo	OK	7.19285	2.77421	9.96706	-1.37449	-2.85748	5e-05	0.00153795	yes
ENSDARG00000078280	nkx3-1	8:50268283-50270802	wt	Mo	OK	2.95281	1.05351	4.00632	-1.48689	-2.06836	0.00215	0.0289979	yes
ENSDARG00000056008	atp5g1	3:23468741-23473848	wt	Mo	OK	85.5846	52.4504	138.035	-0.706397	-2.41959	5e-05	0.00153795	yes
ENSDARG00000019808	evpla	6:17959265-17983562	wt	Mo	OK	59.3253	36.3537	95.679	-0.706545	-2.40939	5e-05	0.00153795	yes
ENSDARG00000076857	her3	8:46651082-46652325	wt	Mo	OK	17.6107	10.7782	28.3889	-0.70833	-1.95323	0.00065	0.0123928	yes
ENSDARG00000097815	si:ch73-39o22.3	5:68410885-68411904	wt	Mo	OK	53.8178	32.8883	86.7061	-0.710509	-2.24104	0.0001	0.00278989	yes
ENSDARG00000068156	chchd7	7:58418160-58427454	wt	Mo	OK	14.0688	8.59615	22.6649	-0.710742	-1.67972	0.0045	0.0495232	yes
ENSDARG00000074565	pusl1	11:3479749-3501708	wt	Mo	OK	7.21868	4.4062	11.6249	-0.712199	-1.69068	0.0024	0.0315002	yes
ENSDARG00000078733	cnnm2b	1:30992585-31066791	wt	Mo	OK	2.33425	0.907888	3.24214	-1.36237	-3.32185	5e-05	0.00153795	yes
ENSDARG00000078749	b4galnt3a	4:26401652-26424193	wt	Mo	OK	1.35279	0.16288	1.51567	-3.05406	-4.02228	5e-05	0.00153795	yes
ENSDARG00000078768	abhd15a	15:25011055-25025465	wt	Mo	OK	0.484722	0.880227	1.36495	0.860718	1.75805	0.00295	0.036745	yes
ENSDARG00000035562	mpdu1a	5:23675506-23682065	wt	Mo	OK	8.29372	5.06049	13.3542	-0.71274	-2.1657	0.0002	0.00492144	yes
ENSDARG00000036700	si:ch211-114n24.6	6:6832284-6835877	wt	Mo	OK	26.9168	16.421	43.3378	-0.712963	-2.30951	5e-05	0.00153795	yes
ENSDARG00000035452	camkk1a	5:30683422-30832574	wt	Mo	OK	11.001	6.70726	17.7083	-0.713841	-2.0746	0.00035	0.0076251	yes
ENSDARG00000008287	fam114a1	1:17558397-17922126	wt	Mo	OK	18.6836	11.3906	30.0742	-0.713924	-1.78909	0.00165	0.0238532	yes
ENSDARG00000078979	arhgef40	7:73265921-73349405	wt	Mo	OK	1.73246	2.74309	4.47555	0.662983	1.94016	0.00095	0.0162469	yes
ENSDARG00000104099	si:ch73-144l3.2	3:6317623-6325842	wt	Mo	OK	9.14783	5.57551	14.7233	-0.714326	-1.71402	0.00395	0.0450053	yes
ENSDARG00000040695	fkbp14	16:20489156-20499285	wt	Mo	OK	26.6212	16.2197	42.8409	-0.714826	-1.7178	0.00215	0.0289979	yes
ENSDARG00000033089	si:dkeyp-8h9.1	21:38409576-38415440	wt	Mo	OK	12.4676	7.59293	20.0605	-0.715453	-1.73109	0.00295	0.036745	yes
ENSDARG00000012453	rnls	12:17079647-17201467	wt	Mo	OK	16.806	10.2012	27.0072	-0.720236	-1.76698	0.00305	0.03758	yes
ENSDARG00000027887	zfyve21	13:43506041-43525716	wt	Mo	OK	14.2794	8.66196	22.9414	-0.721167	-1.74997	0.003	0.0371513	yes
ENSDARG00000045946	sec24d	7:69664452-69709547	wt	Mo	OK	20.9323	12.67	33.6023	-0.72431	-2.53809	5e-05	0.00153795	yes
ENSDARG00000079377	arhgef38	1:25717781-25744106	wt	Mo	OK	1.86881	1.06983	2.93864	-0.804744	-1.74432	0.00285	0.0357599	yes
ENSDARG00000076296	triqk	19:33877567-33924576	wt	Mo	OK	10.5491	6.38371	16.9328	-0.724658	-1.79729	0.0021	0.0285033	yes
ENSDARG00000079420	dpp4	22:11598871-11618640	wt	Mo	OK	2.4251	1.10201	3.52711	-1.1379	-2.6507	5e-05	0.00153795	yes
ENSDARG00000079456	si:ch211-149a19.3	19:1928644-1979455	wt	Mo	OK	3.50003	1.64414	5.14417	-1.09004	-2.87122	5e-05	0.00153795	yes
ENSDARG00000100000	si:ch211-209l18.8	22:6497567-6499531	wt	Mo	OK	13.1408	7.94496	21.0858	-0.725937	-2.23594	5e-05	0.00153795	yes
ENSDARG00000099383	dnajb1a	3:45005410-45018310	wt	Mo	OK	12.5754	7.58596	20.1614	-0.729206	-2.1694	0.00045	0.00927217	yes
ENSDARG00000025404	ube2g2	6:8362888-8373856	wt	Mo	OK	26.4065	15.9285	42.335	-0.729279	-2.3672	0.0001	0.00278989	yes
ENSDARG00000079525	slc39a5	23:32409339-32425648	wt	Mo	OK	3.80936	1.98269	5.79205	-0.942091	-2.28738	5e-05	0.00153795	yes
ENSDARG00000079542	stard13a	10:34371858-34460817	wt	Mo	OK	2.31982	1.50052	3.82034	-0.628549	-1.68167	0.00315	0.0382609	yes
ENSDARG00000079564	vmhc	2:24600868-24614260	wt	Mo	OK	1.96479	0.464298	2.42909	-2.08125	-4.68783	5e-05	0.00153795	yes
ENSDARG00000079570	rspo2	16:38504337-38604289	wt	Mo	OK	2.86112	4.77132	7.63244	0.737808	1.82296	0.00125	0.0197028	yes
ENSDARG00000057767	nudt4a	18:15827235-15868830	wt	Mo	OK	6.94024	4.18294	11.1232	-0.73047	-1.83358	0.00155	0.0227929	yes
ENSDARG00000079620	amigo1	8:25097679-25101092	wt	Mo	OK	0.773153	0.283824	1.05698	-1.44576	-1.64254	0.00425	0.0475056	yes
ENSDARG00000079645	sc:d217	22:7866225-8063981	wt	Mo	OK	2.32636	0.712658	3.03902	-1.70679	-2.69064	5e-05	0.00153795	yes
ENSDARG00000079664	DDO	17:6799465-6826800	wt	Mo	OK	0.652996	1.59726	2.25026	1.29045	2.02945	0.00155	0.0227929	yes
ENSDARG00000079703	si:dkey-18p12.4	9:30577169-30581999	wt	Mo	OK	3.55251	0.631028	4.18354	-2.49306	-4.1293	5e-05	0.00153795	yes
ENSDARG00000063313	plbd1	3:3955038-3999637	wt	Mo	OK	12.9527	7.79703	20.7497	-0.732255	-2.25599	0.00025	0.00588102	yes
ENSDARG00000034043	irx5a	7:35407946-35491736	wt	Mo	OK	10.7616	6.46101	17.2226	-0.736066	-2.18033	0.0001	0.00278989	yes
ENSDARG00000007362	sft2d1	13:4239995-4272320	wt	Mo	OK	12.1398	7.27692	19.4167	-0.738349	-2.32758	0.0001	0.00278989	yes
ENSDARG00000105036	arl6ip4	5:68960543-68973730	wt	Mo	OK	26.3015	15.7643	42.0658	-0.73848	-2.31759	5e-05	0.00153795	yes
ENSDARG00000100354	si:ch73-42p12.2	21:33430893-33431549	wt	Mo	OK	51.697	30.9609	82.6579	-0.739634	-2.28	0.00015	0.00390457	yes
ENSDARG00000008593	nbas	20:32933032-33272020	wt	Mo	OK	10.0426	6.00495	16.0476	-0.741907	-2.22954	5e-05	0.00153795	yes
ENSDARG00000079839	arrdc1b	21:14599905-14666411	wt	Mo	OK	1.25559	2.44026	3.69585	0.958665	2.52142	0.0001	0.00278989	yes
ENSDARG00000076381	slc25a1b	10:3269206-3294896	wt	Mo	OK	24.3301	14.5438	38.8739	-0.74234	-2.29492	0.00015	0.00390457	yes
ENSDARG00000008697	epas1a	12:25684398-25738189	wt	Mo	OK	13.977	8.33585	22.3129	-0.745654	-2.56822	5e-05	0.00153795	yes
ENSDARG00000021242	mvp	3:15541502-15584730	wt	Mo	OK	24.3521	14.5121	38.8642	-0.746792	-2.52979	5e-05	0.00153795	yes
ENSDARG00000086057	CABZ01112317.1	8:54172120-54188783	wt	Mo	OK	0.708022	1.8655	2.57352	1.39769	2.66102	0.0001	0.00278989	yes
ENSDARG00000086261	fhdc4	15:32410810-32429999	wt	Mo	OK	2.09262	0.751066	2.84369	-1.4783	-3.02389	5e-05	0.00153795	yes
ENSDARG00000086374	isg15	5:19608231-19609484	wt	Mo	OK	0.30206	1.86111	2.16317	2.62326	2.62696	0.00315	0.0382609	yes
ENSDARG00000007025	ttc9c	14:46362715-46376443	wt	Mo	OK	11.13	6.62939	17.7594	-0.74751	-1.95444	0.00085	0.0149401	yes
ENSDARG00000040295	apoeb	16:24045711-24048429	wt	Mo	OK	412.004	245.278	657.282	-0.748243	-2.54324	5e-05	0.00153795	yes
ENSDARG00000086631	rnh1	22:8973737-8979294	wt	Mo	OK	1.34677	0.772599	2.11937	-0.801709	-1.71722	0.004	0.0454538	yes
ENSDARG00000086703	si:dkey-126g1.7	23:31993313-32005545	wt	Mo	OK	1.53412	0.457763	1.99188	-1.74473	-3.40731	5e-05	0.00153795	yes
ENSDARG00000086735	si:ch1073-111c8.3	15:47342717-47368290	wt	Mo	OK	2.73288	4.56514	7.29802	0.740237	2.08756	0.00025	0.00588102	yes
ENSDARG00000086740	phyh	4:7818631-7827784	wt	Mo	OK	0.530724	1.03287	1.56359	0.960628	1.78382	0.0035	0.0414522	yes
ENSDARG00000044073	fuca2	17:6280820-6294571	wt	Mo	OK	13.1459	7.82078	20.9667	-0.749224	-2.26494	5e-05	0.00153795	yes
ENSDARG00000086762	dfna5a	19:20453533-20470242	wt	Mo	OK	0.246236	1.08135	1.32759	2.13472	2.84256	0.0002	0.00492144	yes
ENSDARG00000086851	si:dkey-264d12.5	11:39884035-39904656	wt	Mo	OK	2.12062	0.947832	3.06845	-1.16178	-2.51151	5e-05	0.00153795	yes
ENSDARG00000004692	nabp1a	9:24403790-24407498	wt	Mo	OK	67.8072	40.3369	108.144	-0.749339	-2.60388	5e-05	0.00153795	yes
ENSDARG00000035809	col1a1b	12:3060965-3098750	wt	Mo	OK	7.23705	4.29964	11.5367	-0.751183	-2.44486	5e-05	0.00153795	yes
ENSDARG00000086874	si:ch211-232i5.3	20:8093969-8106979	wt	Mo	OK	9.82364	5.836	15.6596	-0.751279	-1.99397	0.00125	0.0197028	yes
ENSDARG00000087070	znf977	4:38593063-38608795	wt	Mo	OK	4.43292	2.37027	6.80319	-0.903203	-1.98988	0.0011	0.018176	yes
ENSDARG00000019236	gsr	14:38512654-38532831	wt	Mo	OK	41.4102	24.5956	66.0058	-0.751588	-2.09545	0.00045	0.00927217	yes
ENSDARG00000053652	ndufaf6	16:40537699-40558592	wt	Mo	OK	14.0564	8.34113	22.3975	-0.752914	-2.07663	0.0004	0.00842463	yes
ENSDARG00000087186	si:ch211-232b12.5	11:25076193-25086918	wt	Mo	OK	2.69835	1.74446	4.44281	-0.6293	-1.68367	0.0036	0.0421982	yes
ENSDARG00000087188	nfil3-6	3:13949849-13953705	wt	Mo	OK	0.69475	1.77696	2.47171	1.35484	2.68851	5e-05	0.00153795	yes
ENSDARG00000095556	si:dkey-238c7.12	18:7607071-7609022	wt	Mo	OK	75.0576	44.3652	119.423	-0.75857	-2.39209	5e-05	0.00153795	yes
ENSDARG00000087377	lbh	13:51610359-51617488	wt	Mo	OK	1.56698	3.56678	5.13376	1.18664	1.95896	0.0014	0.0213775	yes
ENSDARG00000057365	elovl8b	8:18164620-18167630	wt	Mo	OK	14.0582	8.28902	22.3472	-0.762135	-2.07652	0.0001	0.00278989	yes
ENSDARG00000087525	CABZ01045212.1	22:36527949-36552596	wt	Mo	OK	3.93474	1.78946	5.7242	-1.13675	-2.96409	5e-05	0.00153795	yes
ENSDARG00000087616	maptb	3:22027455-22085894	wt	Mo	OK	4.10991	1.75	5.85991	-1.23175	-1.73499	0.0008	0.0143865	yes
ENSDARG00000027750	dpp7	5:28559757-28577119	wt	Mo	OK	15.0158	8.84952	23.8653	-0.762811	-2.07411	0.00045	0.00927217	yes
ENSDARG00000002593	slc45a2	21:19409305-19447653	wt	Mo	OK	7.23465	4.26097	11.4956	-0.763742	-2.04747	0.00055	0.0108993	yes
ENSDARG00000087981	slc6a11b	11:1065327-1104981	wt	Mo	OK	2.85142	4.71151	7.56293	0.724508	1.81766	0.00215	0.0289979	yes
ENSDARG00000088013	CYP27A1 (1 of many)	9:38617773-38647618	wt	Mo	OK	1.76446	0.612902	2.37736	-1.5255	-2.06117	0.00315	0.0382609	yes
ENSDARG00000014488	ca2	24:32735384-32750019	wt	Mo	OK	7.30568	4.29337	11.5991	-0.766907	-1.71968	0.0032	0.0387033	yes
ENSDARG00000088307	mkl2a	12:19854525-19923227	wt	Mo	OK	1.85719	2.96786	4.82505	0.676303	1.8385	0.0015	0.0224044	yes
ENSDARG00000088337	wu:fc34e06	1:39965480-39986482	wt	Mo	OK	1.2661	0.778263	2.04436	-0.702061	-1.71887	0.00335	0.0400082	yes
ENSDARG00000088347	sp1	11:19667-28747	wt	Mo	OK	3.20071	5.89294	9.09365	0.880595	1.74373	0.00145	0.0219063	yes
ENSDARG00000088549	si:ch1073-390k14.1	18:5986140-6002827	wt	Mo	OK	0.704351	2.361	3.06535	1.74503	3.82287	5e-05	0.00153795	yes
ENSDARG00000088711	lgals1l1	3:28808782-28829415	wt	Mo	OK	7.0019	0.407555	7.40946	-4.10268	-4.01995	5e-05	0.00153795	yes
ENSDARG00000069980	lman1	21:10609402-10638624	wt	Mo	OK	33.2761	19.5549	52.831	-0.766957	-2.57527	5e-05	0.00153795	yes
ENSDARG00000079009	abca1b	14:6117245-6212349	wt	Mo	OK	18.8658	11.0657	29.9315	-0.769674	-2.60982	5e-05	0.00153795	yes
ENSDARG00000088813	ppp1r3ab	25:21689624-21698382	wt	Mo	OK	1.0004	0.259607	1.26001	-1.94618	-3.79974	5e-05	0.00153795	yes
ENSDARG00000088885	si:ch1073-340i21.3	15:46114201-46121452	wt	Mo	OK	4.41184	1.29196	5.7038	-1.77182	-3.09849	5e-05	0.00153795	yes
ENSDARG00000088967	wnk4b	3:22312764-22416759	wt	Mo	OK	1.5293	0.932616	2.46192	-0.713521	-1.66487	0.00355	0.0418993	yes
ENSDARG00000088972	si:dkey-238d18.4	15:37953747-37974043	wt	Mo	OK	1.59139	0.858301	2.44969	-0.890731	-1.86854	0.0016	0.0233674	yes
ENSDARG00000019845	pdlim1	13:25632457-25643733	wt	Mo	OK	68.9976	40.3838	109.381	-0.772769	-2.57824	5e-05	0.00153795	yes
ENSDARG00000089043	ptpn6	16:31765420-31801373	wt	Mo	OK	1.24641	0.422251	1.66866	-1.56161	-1.55944	0.0044	0.0486418	yes
ENSDARG00000062372	nrd1b	22:17188132-17209814	wt	Mo	OK	8.74335	5.1085	13.8518	-0.775287	-2.48265	0.0001	0.00278989	yes
ENSDARG00000003635	mogat3b	5:37996476-38004317	wt	Mo	OK	7.76015	4.52607	12.2862	-0.777825	-2.02396	0.00055	0.0108993	yes
ENSDARG00000089139	im:7145024	25:8933356-8963844	wt	Mo	OK	1.39008	4.55854	5.94862	1.7134	2.60472	5e-05	0.00153795	yes
ENSDARG00000089181	adad1	14:1226795-1251685	wt	Mo	OK	0.287187	0.890572	1.17776	1.63274	2.39858	0.0003	0.00678651	yes
ENSDARG00000089190	TANC1 (1 of many)	9:52471707-52751628	wt	Mo	OK	2.76656	6.73506	9.50162	1.2836	4.05764	5e-05	0.00153795	yes
ENSDARG00000089223	ngfrb	12:9912097-10001027	wt	Mo	OK	3.22107	1.44963	4.6707	-1.15185	-2.52246	5e-05	0.00153795	yes
ENSDARG00000089334	ednrba	1:27820833-27826119	wt	Mo	OK	1.9825	0.79383	2.77633	-1.32042	-2.22726	0.00065	0.0123928	yes
ENSDARG00000046148	tnfaip8l2b	16:29763941-29779166	wt	Mo	OK	14.8369	8.65263	23.4895	-0.777974	-2.25967	0.0003	0.00678651	yes
ENSDARG00000089418	si:dkey-164f24.2	8:32473500-32488583	wt	Mo	OK	5.72594	2.86947	8.59541	-0.996729	-2.22786	0.0002	0.00492144	yes
ENSDARG00000041703	rrbp1b	22:25059296-25082243	wt	Mo	OK	59.4687	34.6755	94.1442	-0.778214	-2.81173	5e-05	0.00153795	yes
ENSDARG00000089766	nrg3b	12:29197749-29509736	wt	Mo	OK	1.04764	0.458411	1.50605	-1.19243	-2.13116	0.00085	0.0149401	yes
ENSDARG00000073931	otulina	24:10162684-10204170	wt	Mo	OK	6.83075	3.96718	10.7979	-0.783929	-1.83676	0.0019	0.0263534	yes
ENSDARG00000015674	msx3	13:24531787-24534218	wt	Mo	OK	11.038	6.38985	17.4278	-0.78862	-2.38443	5e-05	0.00153795	yes
ENSDARG00000090091	si:ch211-238e22.2	4:55718158-55725165	wt	Mo	OK	6.69972	3.28216	9.98188	-1.02945	-3.20813	5e-05	0.00153795	yes
ENSDARG00000091598	si:ch73-91k6.2	20:51583090-51586001	wt	Mo	OK	18.34	10.6077	28.9477	-0.789881	-2.40525	5e-05	0.00153795	yes
ENSDARG00000090202	rbm11	21:34942217-34953246	wt	Mo	OK	3.05832	0.486237	3.54456	-2.65301	-1.7669	0.0037	0.0429874	yes
ENSDARG00000086579	si:ch1073-147h9.1	1:50998007-51016982	wt	Mo	OK	6.7972	3.93004	10.7272	-0.790397	-1.8912	0.0019	0.0263534	yes
ENSDARG00000007250	use1	22:11041159-11049386	wt	Mo	OK	17.2186	9.94996	27.1686	-0.791205	-2.48053	5e-05	0.00153795	yes
ENSDARG00000090394	FQ311892.1	11:648094-736223	wt	Mo	OK	3.62853	1.44585	5.07438	-1.32747	-3.1078	5e-05	0.00153795	yes
ENSDARG00000090512	trim8a	13:11743670-11795748	wt	Mo	OK	3.89236	5.71186	9.60422	0.553315	1.62703	0.00425	0.0475056	yes
ENSDARG00000055108	gde1	22:26959879-26990064	wt	Mo	OK	12.5077	7.21749	19.7252	-0.793246	-1.86434	0.0015	0.0224044	yes
ENSDARG00000089986	TP53INP2	23:2597814-2610837	wt	Mo	OK	8.34633	4.8161	13.1624	-0.793275	-2.45755	5e-05	0.00153795	yes
ENSDARG00000077044	arl6ip5a	6:43236676-43244095	wt	Mo	OK	14.278	8.20986	22.4879	-0.798368	-2.35307	0.0001	0.00278989	yes
ENSDARG00000090708	si:dkey-28g23.6	17:29199403-29207948	wt	Mo	OK	2.31306	4.91274	7.2258	1.08672	2.09611	0.00075	0.0137623	yes
ENSDARG00000092225	si:dkeyp-13a3.10	2:16916958-16927006	wt	Mo	OK	7.19075	4.13256	11.3233	-0.799106	-2.20659	0.0005	0.0100956	yes
ENSDARG00000077202	mocs2	10:9112743-9123921	wt	Mo	OK	18.2837	10.5051	28.7888	-0.799463	-2.10981	0.00025	0.00588102	yes
ENSDARG00000090903	CREB3L3 (1 of many)	2:53253653-53311370	wt	Mo	OK	1.50871	0.468492	1.9772	-1.68722	-2.67773	5e-05	0.00153795	yes
ENSDARG00000034268	slit3	14:24194572-24463916	wt	Mo	OK	8.22031	4.72215	12.9425	-0.799748	-1.77855	0.00195	0.0269377	yes
ENSDARG00000091128	LRRC75B (1 of many)	10:41746653-41813830	wt	Mo	OK	0.564401	3.54262	4.10702	2.65002	4.30172	5e-05	0.00153795	yes
ENSDARG00000091253	smyd1b	8:949499-985784	wt	Mo	OK	1.27598	0.382871	1.65885	-1.73667	-2.23309	0.0004	0.00842463	yes
ENSDARG00000091513	si:dkey-22o12.2	1:29539782-29562893	wt	Mo	OK	3.00359	1.75153	4.75512	-0.778069	-2.16781	0.0003	0.00678651	yes
ENSDARG00000043180	gpd1b	22:6966199-6977128	wt	Mo	OK	17.6194	10.0888	27.7082	-0.804415	-2.41161	0.0001	0.00278989	yes
ENSDARG00000079727	sepp1b	2:27739163-27745471	wt	Mo	OK	13.9996	8.01091	22.0105	-0.80535	-2.1564	0.00025	0.00588102	yes
ENSDARG00000091623	TMEM74	16:38850531-38851374	wt	Mo	OK	1.15627	3.96635	5.12262	1.77833	2.77845	5e-05	0.00153795	yes
ENSDARG00000013561	pgm1	6:32023268-32038311	wt	Mo	OK	7.03197	4.02004	11.052	-0.80672	-2.18533	0.0004	0.00842463	yes
ENSDARG00000091870	si:rp71-29l5.1	9:24941843-25069601	wt	Mo	OK	1.03081	2.28178	3.31259	1.14639	1.9503	0.00155	0.0227929	yes
ENSDARG00000069379	zgc:158868	18:22120312-22127312	wt	Mo	OK	12.6925	7.25291	19.9454	-0.807345	-2.08016	0.00075	0.0137623	yes
ENSDARG00000027154	tpd52l2a	8:23169746-23190398	wt	Mo	OK	34.4714	19.675	54.1464	-0.809036	-1.79491	0.00235	0.0310825	yes
ENSDARG00000092060	tbx5b	5:22647368-22657915	wt	Mo	OK	1.77459	0.729604	2.50419	-1.2823	-2.01185	0.00155	0.0227929	yes
ENSDARG00000092067	atn1	16:31890785-31913397	wt	Mo	OK	1.07551	2.23321	3.30872	1.05409	2.88047	5e-05	0.00153795	yes
ENSDARG00000096803	si:ch73-91k6.6	20:51576768-51578157	wt	Mo	OK	8.84155	5.03823	13.8798	-0.811384	-1.96681	0.0012	0.0191619	yes
ENSDARG00000100109	trappc2l	7:55332069-55335959	wt	Mo	OK	65.3755	37.2525	102.628	-0.811412	-2.4565	5e-05	0.00153795	yes
ENSDARG00000103846	hspa5	5:2440675-2448586	wt	Mo	OK	53.2514	30.3312	83.5826	-0.812017	-2.85432	5e-05	0.00153795	yes
ENSDARG00000092310	si:ch211-199g17.2	19:43984188-44008335	wt	Mo	OK	2.64797	6.38672	9.03469	1.27019	1.99234	0.00095	0.0162469	yes
ENSDARG00000092315	si:dkeyp-15f12.4	5:31529328-31532046	wt	Mo	OK	1.61774	4.83837	6.45611	1.58054	2.61161	0.0001	0.00278989	yes
ENSDARG00000092455	si:ch211-246e12.3	3:18484944-18500900	wt	Mo	OK	2.03113	0.799636	2.83077	-1.34487	-2.23374	0.00035	0.0076251	yes
ENSDARG00000092510	si:dkey-47k20.6	18:33648321-33652255	wt	Mo	OK	0.643583	1.58997	2.23355	1.3048	2.1513	0.0003	0.00678651	yes
ENSDARG00000092638	ptprua	19:16318255-16750787	wt	Mo	OK	0.389626	0.83084	1.22047	1.09248	1.54993	0.0024	0.0315002	yes
ENSDARG00000010008	vim	24:32236985-32281769	wt	Mo	OK	19.6128	11.1696	30.7824	-0.812215	-2.26397	0.00015	0.00390457	yes
ENSDARG00000060962	btr04	7:15924873-15943187	wt	Mo	OK	18.0797	10.2954	28.3751	-0.812372	-1.98436	0.00115	0.0186952	yes
ENSDARG00000039381	ch25hl1.1	18:26871512-26872581	wt	Mo	OK	10.1119	5.74638	15.8583	-0.815327	-2.01645	0.00065	0.0123928	yes
ENSDARG00000063295	myh9a	6:7578623-7619545	wt	Mo	OK	71.5109	40.5443	112.055	-0.818663	-2.5951	5e-05	0.00153795	yes
ENSDARG00000093048	si:ch211-158d24.4	8:41639905-41643357	wt	Mo	OK	2.14319	5.51886	7.66205	1.36461	2.55331	5e-05	0.00153795	yes
ENSDARG00000093126	si:ch73-112l6.1	21:22348488-22362349	wt	Mo	OK	4.40459	2.87685	7.28144	-0.614516	-1.91758	0.001	0.0168992	yes
ENSDARG00000093176	zgc:77118	15:35257362-35268363	wt	Mo	OK	2.80853	5.19302	8.00155	0.886759	1.96692	0.001	0.0168992	yes
ENSDARG00000093235	TST	3:25036256-25039283	wt	Mo	OK	2.50352	4.39849	6.90201	0.813049	1.88783	0.0012	0.0191619	yes
ENSDARG00000093423	swsap1	3:14415960-14421714	wt	Mo	OK	3.13217	1.39498	4.52715	-1.16691	-2.17967	0.0008	0.0143865	yes
ENSDARG00000093438	si:ch73-191k20.4	1:8290388-8293852	wt	Mo	OK	0.468986	1.58134	2.05033	1.75353	1.97576	0.0043	0.0477834	yes
ENSDARG00000093440	tnfaip6	9:22953365-22968944	wt	Mo	OK	1.51315	5.89546	7.40861	1.96205	3.98088	5e-05	0.00153795	yes
ENSDARG00000093444	si:dkey-106l3.7	10:17130296-17142855	wt	Mo	OK	2.17192	1.19731	3.36923	-0.859175	-1.72343	0.00365	0.042522	yes
ENSDARG00000055926	foxi3a	21:30314560-30316256	wt	Mo	OK	8.29448	4.70152	12.996	-0.819023	-2.12826	0.00015	0.00390457	yes
ENSDARG00000071013	arl6ip6	6:13114312-13142615	wt	Mo	OK	13.07	7.40245	20.4725	-0.820184	-2.1744	0.0002	0.00492144	yes
ENSDARG00000102995	rbm24a	19:46523207-46558357	wt	Mo	OK	14.3288	8.11469	22.4435	-0.820313	-1.66474	0.0038	0.0437332	yes
ENSDARG00000098730	eng1b	1:6995894-7000026	wt	Mo	OK	7.14481	4.04483	11.1896	-0.820818	-1.69188	0.0031	0.0379229	yes
ENSDARG00000024398	get4	12:11224650-11268463	wt	Mo	OK	31.6677	17.9277	49.5954	-0.820821	-2.7763	5e-05	0.00153795	yes
ENSDARG00000053232	itgb1b.1	2:43719682-43753656	wt	Mo	OK	8.58493	4.85878	13.4437	-0.821212	-2.27741	5e-05	0.00153795	yes
ENSDARG00000003854	acsl1b	14:918929-952589	wt	Mo	OK	34.7926	19.6746	54.4672	-0.822443	-2.29624	5e-05	0.00153795	yes
ENSDARG00000006422	esyt3	9:23972986-23996163	wt	Mo	OK	10.0655	5.68636	15.7519	-0.823836	-1.80625	0.0028	0.0353922	yes
ENSDARG00000093831	znf1121	4:29893648-29900097	wt	Mo	OK	2.69039	1.24271	3.9331	-1.11432	-2.14113	0.0005	0.0100956	yes
ENSDARG00000093926	si:dkey-71b5.2	16:22218280-22293132	wt	Mo	OK	7.96909	1.86607	9.83516	-2.09441	-2.62047	0.0002	0.00492144	yes
ENSDARG00000094034	znf1045	4:48960737-48972669	wt	Mo	OK	1.92364	4.29836	6.222	1.15994	1.95966	0.00165	0.0238532	yes
ENSDARG00000094098	si:ch211-278p9.3	17:7333068-7344738	wt	Mo	OK	0.378428	0.866191	1.24462	1.19467	2.0298	0.00155	0.0227929	yes
ENSDARG00000057100	zwilch	18:19467581-19494377	wt	Mo	OK	39.465	22.2836	61.7486	-0.824594	-2.85928	5e-05	0.00153795	yes
ENSDARG00000094112	slc22a21	21:45866573-45881057	wt	Mo	OK	0.303888	0.912676	1.21656	1.58656	1.85307	0.002	0.0274731	yes
ENSDARG00000014624	si:dkeyp-94g1.1	2:48691639-48707307	wt	Mo	OK	10.389	5.86499	16.254	-0.824861	-2.42327	0.0001	0.00278989	yes
ENSDARG00000059809	caska	9:33555034-33799786	wt	Mo	OK	18.5771	10.4833	29.0604	-0.825435	-1.57353	0.0029	0.0362013	yes
ENSDARG00000094345	si:dkey-261l7.2	23:31326765-31340055	wt	Mo	OK	1.7861	0.710324	2.49642	-1.33027	-2.63821	5e-05	0.00153795	yes
ENSDARG00000000369	prkag3b	9:14119125-14137693	wt	Mo	OK	8.80138	4.95928	13.7607	-0.827599	-1.8481	0.0015	0.0224044	yes
ENSDARG00000094443	CT027609.1	4:55930461-55936210	wt	Mo	OK	0.585181	1.48611	2.07129	1.34459	1.98823	0.0023	0.0305868	yes
ENSDARG00000094488	si:ch211-214j8.15	5:25500634-25509210	wt	Mo	OK	3.9838	5.8902	9.874	0.564171	1.68915	0.00255	0.0330129	yes
ENSDARG00000100952	wu:fj16a03	13:2774425-2779553	wt	Mo	OK	27.0167	15.1985	42.2152	-0.829924	-1.81305	0.0024	0.0315002	yes
ENSDARG00000068192	taf4a	11:20787194-20827670	wt	Mo	OK	8.05785	4.53282	12.5907	-0.829986	-2.36837	5e-05	0.00153795	yes
ENSDARG00000040523	smpd2a	23:5631615-5653957	wt	Mo	OK	9.72818	5.4639	15.1921	-0.832239	-2.30513	5e-05	0.00153795	yes
ENSDARG00000094558	si:dkeyp-53e4.1	4:42746118-42752729	wt	Mo	OK	1.74282	0.903556	2.64638	-0.947741	-1.7546	0.00395	0.0450053	yes
ENSDARG00000016481	ptpn2a	16:10164589-10180985	wt	Mo	OK	9.0017	5.05231	14.054	-0.833254	-2.25903	0.00025	0.00588102	yes
ENSDARG00000094666	si:ch73-223d24.4	5:35905319-35906466	wt	Mo	OK	0	2.7524	2.7524	inf	#NAME?	5e-05	0.00153795	yes
ENSDARG00000070057	si:dkey-69o16.5	9:11616425-11624533	wt	Mo	OK	7.99822	4.47966	12.4779	-0.836291	-1.9709	0.00105	0.0175705	yes
ENSDARG00000094760	si:dkey-125i10.3	5:22752386-22762438	wt	Mo	OK	3.96226	2.10156	6.06382	-0.914861	-1.73807	0.0033	0.0396324	yes
ENSDARG00000094937	si:dkey-31j12.2	8:37251919-37358658	wt	Mo	OK	6.69241	1.78278	8.47519	-1.90839	-2.20997	0.002	0.0274731	yes
ENSDARG00000094962	si:dkeyp-13a3.8	2:16844270-16850790	wt	Mo	OK	0	1.26757	1.26757	inf	#NAME?	5e-05	0.00153795	yes
ENSDARG00000069583	CNDP1	16:55296447-55320715	wt	Mo	OK	18.1255	10.1182	28.2437	-0.841075	-2.22776	0.00025	0.00588102	yes
ENSDARG00000101602	preb	16:2327819-2342740	wt	Mo	OK	20.7747	11.5968	32.3715	-0.841103	-2.72326	5e-05	0.00153795	yes
ENSDARG00000095139	si:dkey-178o8.2	23:14651810-14659136	wt	Mo	OK	3.88886	1.83172	5.72058	-1.08614	-2.60207	5e-05	0.00153795	yes
ENSDARG00000045249	nif3l1	12:3834686-3872973	wt	Mo	OK	16.5648	9.24347	25.8083	-0.841619	-2.55342	5e-05	0.00153795	yes
ENSDARG00000087046	si:ch211-222k6.2	22:10024511-10026611	wt	Mo	OK	6.94604	3.84708	10.7931	-0.852429	-1.83492	0.0016	0.0233674	yes
ENSDARG00000008030	myl9b	6:1641805-1664198	wt	Mo	OK	25.2599	13.9717	39.2316	-0.854342	-2.93476	5e-05	0.00153795	yes
ENSDARG00000095378	gdf10a	13:31155209-31159175	wt	Mo	OK	2.8679	1.25957	4.12747	-1.18707	-2.15423	0.00025	0.00588102	yes
ENSDARG00000038858	setd7	14:47212648-47226279	wt	Mo	OK	10.604	5.85307	16.4571	-0.857349	-2.37201	0.0002	0.00492144	yes
ENSDARG00000101334	ctsc	15:43682885-43704485	wt	Mo	OK	36.3184	20.043	56.3614	-0.857603	-2.96693	5e-05	0.00153795	yes
ENSDARG00000069122	si:ch211-216l23.2	18:17765447-17786522	wt	Mo	OK	22.9885	12.6674	35.6559	-0.859798	-2.49945	5e-05	0.00153795	yes
ENSDARG00000095754	si:dkey-234h16.7	5:19458187-19459737	wt	Mo	OK	6.15511	3.67317	9.82828	-0.744759	-1.80921	0.00225	0.0300621	yes
ENSDARG00000061764	ahnak	14:26461226-26498229	wt	Mo	OK	68.9796	37.9869	106.966	-0.86067	-2.78287	5e-05	0.00153795	yes
ENSDARG00000069463	alox12	7:25758478-25776753	wt	Mo	OK	35.454	19.4867	54.9407	-0.86346	-3.00486	5e-05	0.00153795	yes
ENSDARG00000028816	tmed3	7:29904505-29906541	wt	Mo	OK	29.9004	16.413	46.3134	-0.865326	-2.83965	5e-05	0.00153795	yes
ENSDARG00000095922	zgc:91909	8:50977783-50978977	wt	Mo	OK	6.0681	3.05564	9.12374	-0.989773	-1.78272	0.0034	0.0405204	yes
ENSDARG00000032039	mxd1	5:13206741-13266434	wt	Mo	OK	9.82703	5.36228	15.1893	-0.873909	-2.29402	5e-05	0.00153795	yes
ENSDARG00000102829	cobll1b	9:50347320-50508779	wt	Mo	OK	8.75473	4.77229	13.527	-0.875382	-1.92338	0.00085	0.0149401	yes
ENSDARG00000023498	gmppab	6:13273305-13280695	wt	Mo	OK	16.0523	8.74875	24.801	-0.875632	-2.7601	5e-05	0.00153795	yes
ENSDARG00000096533	rltgr	12:6124640-6125961	wt	Mo	OK	4.65537	2.3943	7.04967	-0.959294	-2.08526	0.001	0.0168992	yes
ENSDARG00000077938	cd248b	21:26456998-26459041	wt	Mo	OK	17.887	9.74782	27.6348	-0.875761	-2.83809	5e-05	0.00153795	yes
ENSDARG00000096628	si:ch73-119o17.1	12:14100036-14105041	wt	Mo	OK	0.246021	0.775446	1.02147	1.65624	2.56603	0.0001	0.00278989	yes
ENSDARG00000096687	rgs7b	12:47575729-47604340	wt	Mo	OK	0.627819	2.1088	2.73662	1.748	1.79274	0.0005	0.0100956	yes
ENSDARG00000012066	dcn	4:16379785-16417761	wt	Mo	OK	11.2559	6.1205	17.3764	-0.878962	-2.71264	5e-05	0.00153795	yes
ENSDARG00000096770	si:ch73-21k16.6	20:47053370-47056048	wt	Mo	OK	0.912837	1.75339	2.66623	0.941713	1.98393	0.001	0.0168992	yes
ENSDARG00000062054	cpt1ab	25:23494441-23546729	wt	Mo	OK	10.2191	5.55131	15.7704	-0.880372	-2.85024	5e-05	0.00153795	yes
ENSDARG00000013968	psap	13:4876337-4900378	wt	Mo	OK	163.261	88.5139	251.775	-0.883202	-2.73495	5e-05	0.00153795	yes
ENSDARG00000096857	si:ch73-126m5.4	6:48381485-48382464	wt	Mo	OK	4.80564	2.28869	7.09433	-1.07021	-1.96824	0.00165	0.0238532	yes
ENSDARG00000096887	si:ch211-220p4.1	25:30472409-30597957	wt	Mo	OK	3.0414	1.82689	4.86829	-0.735345	-2.37367	5e-05	0.00153795	yes
ENSDARG00000096897	si:dkey-90a13.10	23:14172268-14176541	wt	Mo	OK	0.820849	2.66554	3.48639	1.69924	1.98437	0.0031	0.0379229	yes
ENSDARG00000096933	si:ch211-135n15.2	16:42868919-42878015	wt	Mo	OK	5.04985	1.02697	6.07682	-2.29784	-2.47573	5e-05	0.00153795	yes
ENSDARG00000096951	si:dkey-193b18.1	15:29795500-29876839	wt	Mo	OK	2.82182	1.42227	4.24409	-0.988432	-2.60883	5e-05	0.00153795	yes
ENSDARG00000096978	si:ch1073-147e4.1	3:25820535-25843206	wt	Mo	OK	4.31196	1.38841	5.70037	-1.63491	-4.52217	5e-05	0.00153795	yes
ENSDARG00000099439	serp1	18:3475228-3479349	wt	Mo	OK	243.547	132.008	375.555	-0.883574	-3.16308	5e-05	0.00153795	yes
ENSDARG00000103537	ttll12	4:8742608-8778419	wt	Mo	OK	7.6084	4.11828	11.7267	-0.885552	-2.51368	5e-05	0.00153795	yes
ENSDARG00000097189	si:ch1073-235i16.2	3:25853882-25857451	wt	Mo	OK	5.5604	3.10967	8.67007	-0.838426	-2.26126	0.0001	0.00278989	yes
ENSDARG00000017261	gdpd1	15:16950173-16958853	wt	Mo	OK	20.9399	11.3252	32.2651	-0.886717	-2.6115	5e-05	0.00153795	yes
ENSDARG00000090850	serpina1l	20:10550784-10553957	wt	Mo	OK	15.7862	8.52115	24.3073	-0.889544	-2.62681	5e-05	0.00153795	yes
ENSDARG00000097504	si:ch211-212c13.7p	15:21178232-21303684	wt	Mo	OK	1.52639	0.505306	2.0317	-1.59489	-1.79394	0.00345	0.0409451	yes
ENSDARG00000097606	tmem82	23:24558931-24562155	wt	Mo	OK	2.14628	0.824619	2.9709	-1.38004	-1.9996	0.00185	0.0258486	yes
ENSDARG00000097635	wu:fb18f06	15:46141931-46143819	wt	Mo	OK	4.65492	2.22422	6.87914	-1.06545	-1.64912	0.0009	0.0156103	yes
ENSDARG00000069537	si:dkey-238c7.16	18:7520265-7522101	wt	Mo	OK	25.7665	13.8364	39.6029	-0.897031	-2.52276	5e-05	0.00153795	yes
ENSDARG00000027986	slc35d1b	2:5882004-5898444	wt	Mo	OK	7.60039	4.07768	11.6781	-0.898327	-2.35467	5e-05	0.00153795	yes
ENSDARG00000056836	si:ch211-125o16.4	17:22524811-22532842	wt	Mo	OK	14.9595	8.01472	22.9742	-0.900336	-3.01598	5e-05	0.00153795	yes
ENSDARG00000097826	si:dkey-239b22.2	12:38859723-38885982	wt	Mo	OK	0.995757	0.364413	1.36017	-1.45022	-2.47887	0.0001	0.00278989	yes
ENSDARG00000070844	gamt	11:5858667-5868489	wt	Mo	OK	32.211	17.2369	49.4479	-0.902057	-2.73646	5e-05	0.00153795	yes
ENSDARG00000097886	si:ch1073-172f18.2	9:1640456-1647596	wt	Mo	OK	3.1793	1.74811	4.92741	-0.862913	-2.08276	0.0002	0.00492144	yes
ENSDARG00000097929	si:dkey-117j14.6	24:17140488-17184871	wt	Mo	OK	0.880089	4.07728	4.95737	2.21188	2.97525	5e-05	0.00153795	yes
ENSDARG00000035546	jmjd7	17:10555606-10582011	wt	Mo	OK	11.0933	5.92916	17.0225	-0.903791	-2.42753	5e-05	0.00153795	yes
ENSDARG00000099101	gch2	12:24994390-25001210	wt	Mo	OK	30.5242	16.2511	46.7753	-0.90942	-3.07387	5e-05	0.00153795	yes
ENSDARG00000098029	si:ch211-129o18.4	23:29407309-29431223	wt	Mo	OK	1.74857	0.933203	2.68177	-0.905915	-2.02034	0.001	0.0168992	yes
ENSDARG00000098096	slc12a1	18:5593324-5616079	wt	Mo	OK	2.6119	0.828361	3.44026	-1.65677	-3.17203	5e-05	0.00153795	yes
ENSDARG00000098103	tefb	3:5142980-5157744	wt	Mo	OK	2.14289	5.23978	7.38267	1.28995	3.17604	5e-05	0.00153795	yes
ENSDARG00000075536	cpne1	11:26138362-26164078	wt	Mo	OK	37.5812	19.9491	57.5303	-0.913686	-1.61394	0.0024	0.0315002	yes
ENSDARG00000097959	si:dkey-248g15.3	17:2373116-2378829	wt	Mo	OK	96.9778	51.4359	148.414	-0.914878	-2.58819	5e-05	0.00153795	yes
ENSDARG00000098192	CABZ01002718.1	4:66384943-66401187	wt	Mo	OK	3.21434	1.876	5.09034	-0.776861	-2.08959	0.00025	0.00588102	yes
ENSDARG00000098224	tmem56b	3:14238209-14302525	wt	Mo	OK	6.11445	3.59546	9.70991	-0.766045	-2.23141	0.00025	0.00588102	yes
ENSDARG00000069673	chid1	25:3662414-3675230	wt	Mo	OK	7.28006	3.85966	11.1397	-0.915475	-2.22128	0.00025	0.00588102	yes
ENSDARG00000098239	zgc:85932	15:43452448-43507427	wt	Mo	OK	6.33048	3.23966	9.57014	-0.966472	-2.59765	5e-05	0.00153795	yes
ENSDARG00000103173	stx8	6:23218142-23331259	wt	Mo	OK	11.9144	6.31453	18.2289	-0.915959	-2.53633	5e-05	0.00153795	yes
ENSDARG00000090912	npc2	17:43031044-43041345	wt	Mo	OK	93.0519	49.092	142.144	-0.922547	-3.16249	5e-05	0.00153795	yes
ENSDARG00000098293	si:dkey-27i16.2	14:14255368-14260854	wt	Mo	OK	3.63909	1.63038	5.26947	-1.15837	-1.80559	0.0038	0.0437332	yes
ENSDARG00000098316	si:ch211-128b10.8	18:32047644-32052663	wt	Mo	OK	3.47134	1.97786	5.4492	-0.811557	-2.17322	0.00015	0.00390457	yes
ENSDARG00000020301	os9	6:39205148-39221073	wt	Mo	OK	17.1812	9.05016	26.2314	-0.924812	-1.86402	0.0013	0.0202483	yes
ENSDARG00000098386	ctps1b	16:35462699-35474185	wt	Mo	OK	3.04635	6.17164	9.21799	1.01857	1.93096	0.00065	0.0123928	yes
ENSDARG00000098408	stbd1	21:5483005-5496911	wt	Mo	OK	4.46893	2.56301	7.03194	-0.802088	-2.10018	0.00035	0.0076251	yes
ENSDARG00000086746	prodha	21:5781883-5816502	wt	Mo	OK	7.66253	4.01516	11.6777	-0.932364	-2.73951	5e-05	0.00153795	yes
ENSDARG00000098503	CABZ01080379.1	24:41485262-41522933	wt	Mo	OK	1.04545	2.12432	3.16977	1.02287	1.91918	0.00165	0.0238532	yes
ENSDARG00000098515	si:dkey-16p6.1	4:41860811-41879101	wt	Mo	OK	0.379732	0.819443	1.19918	1.10966	2.07056	0.00045	0.00927217	yes
ENSDARG00000098550	FO904917.1	12:3542372-3622432	wt	Mo	OK	1.60593	2.40619	4.01212	0.583339	1.68172	0.004	0.0454538	yes
ENSDARG00000098557	BX323564.1	2:10814210-10817351	wt	Mo	OK	1.64927	0.81032	2.45959	-1.02526	-2.20925	0.0002	0.00492144	yes
ENSDARG00000098586	zgc:194887	17:443532-449054	wt	Mo	OK	2.10412	0.752881	2.857	-1.48272	-2.00157	0.0029	0.0362013	yes
ENSDARG00000043126	blf	22:9887324-9894010	wt	Mo	OK	13.526	7.07957	20.6056	-0.933996	-2.66958	5e-05	0.00153795	yes
ENSDARG00000098655	KIF1C	5:67527170-67580786	wt	Mo	OK	3.29977	2.094	5.39377	-0.656104	-2.01964	0.00045	0.00927217	yes
ENSDARG00000098714	si:dkeyp-82b4.2	4:37441708-37579847	wt	Mo	OK	5.18585	2.326	7.51185	-1.15673	-2.85849	5e-05	0.00153795	yes
ENSDARG00000098724	RGR (1 of many)	12:48943519-48948929	wt	Mo	OK	2.54355	5.27702	7.82057	1.05288	2.18955	0.0004	0.00842463	yes
ENSDARG00000033999	cyp26a1	12:8916917-8920510	wt	Mo	OK	39.3357	20.5776	59.9133	-0.934765	-3.18009	5e-05	0.00153795	yes
ENSDARG00000094103	si:dkey-14o1.18	9:15964259-15965273	wt	Mo	OK	7.85882	4.07853	11.9373	-0.946263	-2.06089	0.0011	0.018176	yes
ENSDARG00000008858	cyp7b1	2:42286300-42302717	wt	Mo	OK	7.87196	4.05749	11.9294	-0.956135	-2.5052	5e-05	0.00153795	yes
ENSDARG00000015559	fstl1a	1:46768490-46794128	wt	Mo	OK	25.8618	13.2815	39.1433	-0.961398	-3.10131	5e-05	0.00153795	yes
ENSDARG00000092900	si:ch211-279m15.1	20:31525939-31840938	wt	Mo	OK	469.461	240.334	709.795	-0.965962	-2.79006	5e-05	0.00153795	yes
ENSDARG00000098899	zmp:0000001082	1:58849139-58862863	wt	Mo	OK	1.42593	2.61551	4.04144	0.875194	2.29743	0.0001	0.00278989	yes
ENSDARG00000098952	gata4	20:53146698-53162461	wt	Mo	OK	1.56382	0.456793	2.02061	-1.77546	-2.18289	0.00125	0.0197028	yes
ENSDARG00000097236	SVIP	25:34840416-34963616	wt	Mo	OK	6.79441	3.44891	10.2433	-0.978207	-2.07155	0.0004	0.00842463	yes
ENSDARG00000099060	zgc:111868	12:42208867-42213007	wt	Mo	OK	0.986003	5.27203	6.25803	2.41869	5.75279	5e-05	0.00153795	yes
ENSDARG00000102451	si:ch211-238e22.2	4:55169104-55170124	wt	Mo	OK	8.54862	4.30302	12.8516	-0.990344	-1.80344	0.00365	0.042522	yes
ENSDARG00000045980	cst14b.1	5:4081427-4091680	wt	Mo	OK	225.005	112.578	337.583	-0.999026	-3.48707	5e-05	0.00153795	yes
ENSDARG00000103917	znf185	14:14302535-14337627	wt	Mo	OK	25.0238	12.4995	37.5233	-1.00143	-2.43275	5e-05	0.00153795	yes
ENSDARG00000033466	tagln2	5:36487429-36495307	wt	Mo	OK	102.634	51.1842	153.818	-1.00374	-3.49354	5e-05	0.00153795	yes
ENSDARG00000099124	f3a	24:31340148-31353495	wt	Mo	OK	2.89605	1.46172	4.35777	-0.986426	-1.92289	0.0017	0.024452	yes
ENSDARG00000094500	si:ch211-238e22.4	4:55171546-55172657	wt	Mo	OK	9.43206	4.6902	14.1223	-1.00792	-1.9492	0.0014	0.0213775	yes
ENSDARG00000102640	pdia3	25:29900004-29914020	wt	Mo	OK	260.117	129.295	389.412	-1.00849	-3.62449	5e-05	0.00153795	yes
ENSDARG00000099183	fkbp10a	19:19030928-19134715	wt	Mo	OK	5.29377	2.95535	8.24912	-0.840966	-2.04803	0.001	0.0168992	yes
ENSDARG00000014465	arhgef25b	6:39258633-39278385	wt	Mo	OK	9.30175	4.60764	13.9094	-1.01347	-2.77711	5e-05	0.00153795	yes
ENSDARG00000099197	actc1b	17:117123-124703	wt	Mo	OK	1.47509	0.35026	1.82535	-2.07431	-2.49828	0.00095	0.0162469	yes
ENSDARG00000011405	rps9	16:31966475-31969065	wt	Mo	OK	2151.84	1065.41	3217.25	-1.01415	-3.07352	5e-05	0.00153795	yes
ENSDARG00000099247	si:dkey-68o6.5	3:24465373-24473157	wt	Mo	OK	2.90011	4.74392	7.64403	0.709973	1.87927	0.00155	0.0227929	yes
ENSDARG00000003973	chordc1a	15:43938370-43954698	wt	Mo	OK	14.8402	7.33821	22.1784	-1.01601	-2.92294	5e-05	0.00153795	yes
ENSDARG00000040045	cldn1	2:45474-48529	wt	Mo	OK	26.7872	13.1909	39.9781	-1.022	-2.76063	5e-05	0.00153795	yes
ENSDARG00000099330	si:ch211-246b8.5	4:34328887-34330419	wt	Mo	OK	1.36919	0	1.36919	#NAME?	#NAME?	0.00135	0.0208938	yes
ENSDARG00000099371	cygb1	3:6753947-6783800	wt	Mo	OK	5.09578	3.02734	8.12312	-0.751251	-1.91376	0.0008	0.0143865	yes
ENSDARG00000035719	arl5c	3:15984575-15992257	wt	Mo	OK	11.0947	5.44995	16.5447	-1.02555	-2.81231	5e-05	0.00153795	yes
ENSDARG00000035603	dao.2	5:19667159-19681865	wt	Mo	OK	7.33686	3.60194	10.9388	-1.02639	-2.47954	0.0001	0.00278989	yes
ENSDARG00000090685	tmem241	24:36337565-36349982	wt	Mo	OK	10.2166	5.01347	15.2301	-1.02704	-1.98824	0.0013	0.0202483	yes
ENSDARG00000099465	rnf213a	3:56631748-56746324	wt	Mo	OK	1.17016	0.678919	1.84908	-0.785392	-2.28847	0.00015	0.00390457	yes
ENSDARG00000099511	CABZ01034698.4	22:7866225-8063981	wt	Mo	OK	2.35578	0.766752	3.12253	-1.61937	-2.89336	5e-05	0.00153795	yes
ENSDARG00000099566	lmbrd2a	5:7691641-7734513	wt	Mo	OK	4.52407	2.92025	7.44432	-0.631532	-1.92853	0.0009	0.0156103	yes
ENSDARG00000099573	si:ch211-196c10.12	8:23100911-23101133	wt	Mo	OK	0	2.83691	2.83691	inf	#NAME?	0.00145	0.0219063	yes
ENSDARG00000099582	CABZ01074276.1	16:52031358-52035553	wt	Mo	OK	4.96626	2.74589	7.71215	-0.854884	-1.92216	0.00115	0.0186952	yes
ENSDARG00000039943	fam46ba	16:34092702-34102413	wt	Mo	OK	44.6684	21.8833	66.5517	-1.02942	-3.68001	5e-05	0.00153795	yes
ENSDARG00000099732	gfra1a	13:20261673-20388019	wt	Mo	OK	1.11431	2.11778	3.23209	0.926402	1.71122	0.0041	0.0462521	yes
ENSDARG00000100719	urah	18:31038124-31045193	wt	Mo	OK	15.5506	7.60408	23.1547	-1.03213	-2.23935	0.00015	0.00390457	yes
ENSDARG00000099754	ftr94	3:44862939-44869912	wt	Mo	OK	1.25691	0.192445	1.44935	-2.70736	-3.08488	0.0002	0.00492144	yes
ENSDARG00000093702	si:dkey-126g1.9	23:32007051-32014381	wt	Mo	OK	15.9585	7.78896	23.7475	-1.03482	-2.79719	5e-05	0.00153795	yes
ENSDARG00000099851	GPR180	6:59793426-59802013	wt	Mo	OK	2.4129	1.49838	3.91128	-0.687369	-1.82413	0.00185	0.0258486	yes
ENSDARG00000073905	VWA5A (1 of many)	25:222264-238764	wt	Mo	OK	29.0193	14.1464	43.1657	-1.03657	-3.11798	5e-05	0.00153795	yes
ENSDARG00000099961	bnip3	12:40534028-40549950	wt	Mo	OK	0.874806	1.77605	2.65086	1.02163	2.33926	0.0002	0.00492144	yes
ENSDARG00000075565	lzts1	8:39535136-39541941	wt	Mo	OK	7.789	3.75238	11.5414	-1.05363	-2.61785	5e-05	0.00153795	yes
ENSDARG00000076290	calr	8:16546626-16556779	wt	Mo	OK	42.754	20.5815	63.3355	-1.05471	-3.69654	5e-05	0.00153795	yes
ENSDARG00000003429	hnrpdl	10:5016911-5024216	wt	Mo	OK	195.143	93.8927	289.036	-1.05544	-3.10302	5e-05	0.00153795	yes
ENSDARG00000100055	tox2	6:57903517-58152418	wt	Mo	OK	0.530389	1.13365	1.66404	1.09585	1.8449	0.0024	0.0315002	yes
ENSDARG00000074749	abca12	9:40883825-41044660	wt	Mo	OK	10.5887	5.06736	15.6561	-1.06322	-2.50511	5e-05	0.00153795	yes
ENSDARG00000100128	CU861477.1	2:59444056-59531877	wt	Mo	OK	1.77018	3.0727	4.84288	0.795612	1.88636	0.00085	0.0149401	yes
ENSDARG00000100231	ccdc135	25:13635141-13648406	wt	Mo	OK	0.968071	1.87774	2.84581	0.955813	2.11095	0.0011	0.018176	yes
ENSDARG00000074393	sh3yl1	17:30574323-30635775	wt	Mo	OK	9.11811	4.30302	13.4211	-1.08339	-2.14385	0.00025	0.00588102	yes
ENSDARG00000096829	blvrb	18:46153486-46162090	wt	Mo	OK	7.91442	3.73136	11.6458	-1.08478	-2.45075	5e-05	0.00153795	yes
ENSDARG00000100357	si:ch73-44m9.3	22:8126522-8144595	wt	Mo	OK	5.00636	2.9708	7.97716	-0.752911	-1.71746	0.0041	0.0462521	yes
ENSDARG00000100406	ITIH4 (1 of many)	11:36933894-36962328	wt	Mo	OK	1.8799	0.444442	2.32434	-2.08059	-2.14062	5e-05	0.00153795	yes
ENSDARG00000096359	eppk1	19:22763303-22802818	wt	Mo	OK	40.6973	19.1664	59.8637	-1.08635	-3.38004	5e-05	0.00153795	yes
ENSDARG00000028982	pcca	1:29058142-29149815	wt	Mo	OK	44.4143	20.8056	65.2199	-1.09405	-2.72122	5e-05	0.00153795	yes
ENSDARG00000006008	dct	9:53788136-53813085	wt	Mo	OK	16.6844	7.79662	24.481	-1.09758	-3.38764	5e-05	0.00153795	yes
ENSDARG00000037943	cpt1cb	3:32097186-32158382	wt	Mo	OK	21.258	9.85811	31.1161	-1.10862	-2.34551	5e-05	0.00153795	yes
ENSDARG00000100691	prss35	16:32889284-33050822	wt	Mo	OK	2.63717	0.545008	3.18218	-2.27464	-4.05925	5e-05	0.00153795	yes
ENSDARG00000039579	cfd	13:13550688-13553342	wt	Mo	OK	23.2793	10.7528	34.0321	-1.11434	-2.86227	5e-05	0.00153795	yes
ENSDARG00000019763	acp5a	6:8119582-8126977	wt	Mo	OK	52.6507	24.3185	76.9692	-1.1144	-2.87882	5e-05	0.00153795	yes
ENSDARG00000039682	si:ch211-121a2.2	20:7080754-7090591	wt	Mo	OK	28.7331	13.2288	41.9619	-1.11903	-3.0868	5e-05	0.00153795	yes
ENSDARG00000037961	rcn3	3:32400829-32409358	wt	Mo	OK	52.1186	23.9106	76.0292	-1.12415	-2.35376	0.00015	0.00390457	yes
ENSDARG00000068996	hist2h2l	10:29929303-29930127	wt	Mo	OK	15.7368	7.21823	22.955	-1.12443	-2.83828	5e-05	0.00153795	yes
ENSDARG00000015947	matn4	6:52759103-52847865	wt	Mo	OK	12.1236	5.54203	17.6656	-1.12933	-3.66169	5e-05	0.00153795	yes
ENSDARG00000100792	zgc:154142	1:50150869-50194361	wt	Mo	OK	0.823336	0.194824	1.01816	-2.07931	-2.76728	5e-05	0.00153795	yes
ENSDARG00000093687	si:dkey-193c22.1	5:39600664-39610294	wt	Mo	OK	10.2594	4.68079	14.9402	-1.13212	-3.10094	5e-05	0.00153795	yes
ENSDARG00000100828	CU929150.2	2:45246175-45260490	wt	Mo	OK	2.7363	1.17099	3.90729	-1.22449	-2.11594	0.0008	0.0143865	yes
ENSDARG00000100947	mafk	3:42258029-42275724	wt	Mo	OK	1.5429	2.88515	4.42805	0.903007	1.77141	0.00285	0.0357599	yes
ENSDARG00000088116	gstm.3	8:25283032-25287875	wt	Mo	OK	16.0701	7.30827	23.3784	-1.13677	-3.04818	5e-05	0.00153795	yes
ENSDARG00000100969	tmprss13a	15:12394743-12428992	wt	Mo	OK	3.63577	2.01158	5.64735	-0.853933	-1.94732	0.00125	0.0197028	yes
ENSDARG00000101021	slc22a5	21:45634835-45646180	wt	Mo	OK	1.31667	2.20111	3.51778	0.741343	1.83282	0.00245	0.0320091	yes
ENSDARG00000020956	pck2	24:12775599-12794503	wt	Mo	OK	23.5972	10.6851	34.2823	-1.14301	-3.80174	5e-05	0.00153795	yes
ENSDARG00000101072	cnot6b	14:49747036-49777505	wt	Mo	OK	1.73426	2.90121	4.63547	0.742336	2.31426	5e-05	0.00153795	yes
ENSDARG00000003570	hsp90b1	4:9835548-9842920	wt	Mo	OK	42.8699	19.3943	62.2642	-1.14433	-4.07062	5e-05	0.00153795	yes
ENSDARG00000004979	elovl5	13:2236615-2259761	wt	Mo	OK	8.65373	3.91496	12.5687	-1.14433	-2.2212	5e-05	0.00153795	yes
ENSDARG00000101135	si:dkey-85k7.7	7:21592998-21608008	wt	Mo	OK	2.00459	1.12911	3.1337	-0.828122	-1.76493	0.003	0.0371513	yes
ENSDARG00000076321	col28a2a	9:48600010-48673250	wt	Mo	OK	9.13971	4.08787	13.2276	-1.1608	-1.55668	0.0043	0.0477834	yes
ENSDARG00000036239	gatm	18:35724-146984	wt	Mo	OK	58.0481	25.747	83.7951	-1.17285	-2.06834	0.00115	0.0186952	yes
ENSDARG00000024829	tnw	2:35526960-35584559	wt	Mo	OK	10.9839	4.83748	15.8214	-1.18307	-3.64384	5e-05	0.00153795	yes
ENSDARG00000042684	serpinc1	22:15995940-16001921	wt	Mo	OK	7.98273	3.51395	11.4967	-1.18379	-3.28493	5e-05	0.00153795	yes
ENSDARG00000101189	CR589947.2	3:3871689-3891633	wt	Mo	OK	2.93379	1.97106	4.90485	-0.573794	-1.7017	0.00285	0.0357599	yes
ENSDARG00000012694	c3a.1	1:55460925-55507680	wt	Mo	OK	8.69015	3.82327	12.5134	-1.18457	-3.76549	5e-05	0.00153795	yes
ENSDARG00000101258	col27a1a	16:51876705-52009219	wt	Mo	OK	0.580017	1.29428	1.8743	1.15798	2.40859	0.0001	0.00278989	yes
ENSDARG00000101275	si:dkey-117a16.1	6:36303110-36307217	wt	Mo	OK	1.54875	3.10904	4.65779	1.00537	1.42754	0.0038	0.0437332	yes
ENSDARG00000009001	pdia6	20:31314615-31328243	wt	Mo	OK	17.0103	7.45811	24.4684	-1.18953	-3.68061	5e-05	0.00153795	yes
ENSDARG00000003216	anxa2a	25:33527665-33541952	wt	Mo	OK	31.3258	13.6204	44.9462	-1.20158	-3.88556	5e-05	0.00153795	yes
ENSDARG00000101373	CR356230.1	7:58945016-59008735	wt	Mo	OK	1.07495	2.13777	3.21272	0.991843	2.01348	0.00085	0.0149401	yes
ENSDARG00000101393	si:dkey-31g6.6	6:21892726-21895018	wt	Mo	OK	5.55207	1.53354	7.08561	-1.85616	-2.60328	0.0002	0.00492144	yes
ENSDARG00000101394	fam69b	21:7591525-7617302	wt	Mo	OK	1.22815	2.28944	3.51759	0.898508	2.48917	5e-05	0.00153795	yes
ENSDARG00000103759	fahd2a	8:41152054-41194562	wt	Mo	OK	25.1216	10.8322	35.9538	-1.21359	-3.46194	5e-05	0.00153795	yes
ENSDARG00000018491	pdia4	24:17190258-17197039	wt	Mo	OK	48.0015	20.6403	68.6418	-1.21762	-3.98026	5e-05	0.00153795	yes
ENSDARG00000098415	si:dkey-74k8.8p	14:20727780-20728143	wt	Mo	OK	27.4126	11.6726	39.0852	-1.23171	-2.45679	5e-05	0.00153795	yes
ENSDARG00000068910	nos1	5:11599908-11723105	wt	Mo	OK	31.61	13.3905	45.0005	-1.23917	-3.88047	5e-05	0.00153795	yes
ENSDARG00000101164	NANS (1 of many)	25:5162127-5172508	wt	Mo	OK	20.0636	8.49163	28.5552	-1.24047	-3.85385	5e-05	0.00153795	yes
ENSDARG00000021287	zgc:91909	8:50979967-51038519	wt	Mo	OK	15.8463	6.62213	22.4684	-1.25878	-3.31454	5e-05	0.00153795	yes
ENSDARG00000004889	aga	14:36088126-36096935	wt	Mo	OK	16.4965	6.88219	23.3787	-1.26122	-3.47436	5e-05	0.00153795	yes
ENSDARG00000101765	Metazoa_SRP	11:11369837-11397266	wt	Mo	OK	0	2.21842	2.21842	inf	#NAME?	0.00015	0.00390457	yes
ENSDARG00000103754	aspm	22:23520361-23556045	wt	Mo	OK	64.2652	26.7785	91.0437	-1.26296	-4.43573	5e-05	0.00153795	yes
ENSDARG00000027143	aptx	1:52018882-52024997	wt	Mo	OK	25.4569	10.6049	36.0618	-1.26333	-3.38758	5e-05	0.00153795	yes
ENSDARG00000039605	mat1a	13:18497927-18506252	wt	Mo	OK	11.4023	4.7339	16.1362	-1.26822	-3.76619	5e-05	0.00153795	yes
ENSDARG00000069956	pdlim2	8:38157293-38284975	wt	Mo	OK	9.98504	4.12223	14.1073	-1.27634	-2.41462	5e-05	0.00153795	yes
ENSDARG00000102040	linc-mir30e-2	13:27654878-27674440	wt	Mo	OK	3.97875	1.96761	5.94636	-1.01587	-2.57494	5e-05	0.00153795	yes
ENSDARG00000102050	MCOLN3 (1 of many)	23:43770356-43785552	wt	Mo	OK	1.68174	0.578295	2.26004	-1.54007	-2.53044	0.00015	0.00390457	yes
ENSDARG00000053973	fetub	22:37934446-37944777	wt	Mo	OK	49.8632	20.5833	70.4465	-1.2765	-4.2032	5e-05	0.00153795	yes
ENSDARG00000102074	CR388416.1	4:60980750-61059187	wt	Mo	OK	5.7154	2.92559	8.64099	-0.966126	-1.84314	0.00325	0.0391971	yes
ENSDARG00000102075	RNF122	8:52504952-52523442	wt	Mo	OK	1.5069	3.7853	5.2922	1.32882	1.74053	0.0019	0.0263534	yes
ENSDARG00000071643	zgc:171490	22:6516850-6532772	wt	Mo	OK	27.0825	11.1437	38.2262	-1.28113	-3.97501	5e-05	0.00153795	yes
ENSDARG00000102146	si:ch211-69b7.6	11:11907958-11926604	wt	Mo	OK	2.96435	1.80764	4.77199	-0.713614	-2.16893	0.0002	0.00492144	yes
ENSDARG00000056479	rab1bb	10:26964921-26971995	wt	Mo	OK	27.4029	11.2519	38.6548	-1.28416	-4.01387	5e-05	0.00153795	yes
ENSDARG00000045095	elac1	5:6291777-6301560	wt	Mo	OK	8.12569	3.31866	11.4444	-1.29189	-2.91647	5e-05	0.00153795	yes
ENSDARG00000102850	si:ch211-132i7.2	7:67523899-67524663	wt	Mo	OK	10.3923	4.24331	14.6356	-1.29226	-2.77875	0.00015	0.00390457	yes
ENSDARG00000103347	cyp2aa3	23:42516640-42528380	wt	Mo	OK	9.41284	3.75902	13.1719	-1.32427	-3.53014	5e-05	0.00153795	yes
ENSDARG00000092889	SYCE3	14:34170385-34172789	wt	Mo	OK	7.28183	2.89258	10.1744	-1.33194	-2.44259	5e-05	0.00153795	yes
ENSDARG00000102366	micall2a	3:42395994-42429513	wt	Mo	OK	0.68681	1.57149	2.2583	1.19415	2.57939	5e-05	0.00153795	yes
ENSDARG00000100428	CABZ01043646.1	7:59257925-59258445	wt	Mo	OK	135.943	53.9489	189.892	-1.33334	-3.65608	5e-05	0.00153795	yes
ENSDARG00000045850	ccdc167	4:5246470-5294296	wt	Mo	OK	22.927	9.07266	31.9997	-1.33745	-3.01944	5e-05	0.00153795	yes
ENSDARG00000102414	myhz1.1	22:281040-295380	wt	Mo	OK	2.05667	1.26443	3.3211	-0.70182	-1.89446	0.00115	0.0186952	yes
ENSDARG00000102447	gdpd4a	18:3195884-3244649	wt	Mo	OK	1.38947	0.545073	1.93454	-1.35002	-2.16222	0.001	0.0168992	yes
ENSDARG00000019949	serpinh1b	15:29450291-29454673	wt	Mo	OK	233.507	90.9929	324.5	-1.35964	-4.34291	5e-05	0.00153795	yes
ENSDARG00000102453	slc1a2b	25:36796113-36837199	wt	Mo	OK	1.09284	2.20732	3.30016	1.01421	1.63755	0.00075	0.0137623	yes
ENSDARG00000102456	cfhl4	22:23587102-23598808	wt	Mo	OK	3.84574	1.4322	5.27794	-1.42503	-2.16285	0.0003	0.00678651	yes
ENSDARG00000102549	CR450729.2	3:1785784-1850335	wt	Mo	OK	4.84522	3.32684	8.17206	-0.542409	-1.70027	0.00275	0.0349929	yes
ENSDARG00000103979	calr3a	22:4378102-4384765	wt	Mo	OK	122.74	47.7453	170.485	-1.36217	-4.89503	5e-05	0.00153795	yes
ENSDARG00000102552	si:dkey-103d23.5	18:5625860-5627378	wt	Mo	OK	1.47138	0.658871	2.13025	-1.1591	-1.8095	0.003	0.0371513	yes
ENSDARG00000098367	srp54	17:9918325-9933992	wt	Mo	OK	61.3292	23.7768	85.106	-1.36702	-4.5727	5e-05	0.00153795	yes
ENSDARG00000092155	apoc2	16:24069722-24076129	wt	Mo	OK	19.0725	7.29743	26.3699	-1.38603	-3.37464	5e-05	0.00153795	yes
ENSDARG00000074656	ctss2.1	16:29574509-29578811	wt	Mo	OK	80.1936	29.4524	109.646	-1.4451	-4.69355	5e-05	0.00153795	yes
ENSDARG00000102610	R3HDM2	6:59647553-59696457	wt	Mo	OK	1.26445	2.25066	3.51511	0.831845	1.83327	0.00165	0.0238532	yes
ENSDARG00000090286	serpina1	20:10556859-10560171	wt	Mo	OK	21.537	7.78762	29.3246	-1.46756	-4.21126	5e-05	0.00153795	yes
ENSDARG00000102681	BX664605.2	4:43069547-43077412	wt	Mo	OK	2.77021	1.34366	4.11387	-1.04382	-2.32144	0.0001	0.00278989	yes
ENSDARG00000036237	slc27a2a	18:35724-146984	wt	Mo	OK	12.8509	4.6342	17.4851	-1.47147	-1.73735	0.00155	0.0227929	yes
ENSDARG00000102722	itih3b	11:36910727-36932669	wt	Mo	OK	1.04701	0.444381	1.49139	-1.23641	-2.11152	0.00035	0.0076251	yes
ENSDARG00000027529	hmox1a	3:25880610-25886721	wt	Mo	OK	7.92845	2.8272	10.7556	-1.48766	-3.45443	5e-05	0.00153795	yes
ENSDARG00000102731	si:ch73-299h12.2	21:2233875-2235896	wt	Mo	OK	2.00715	0.657356	2.66451	-1.6104	-2.0584	0.00265	0.033897	yes
ENSDARG00000061061	dpagt1	5:29988702-29995219	wt	Mo	OK	10.608	3.78184	14.3898	-1.488	-3.78192	5e-05	0.00153795	yes
ENSDARG00000102758	FO704661.1	8:52492443-52504152	wt	Mo	OK	0.327228	1.68201	2.00924	2.36182	2.99616	0.0002	0.00492144	yes
ENSDARG00000102788	si:zfos-128g4.1	5:1127929-1131431	wt	Mo	OK	2.41672	4.04313	6.45985	0.742423	1.68609	0.00355	0.0418993	yes
ENSDARG00000102825	olfm2b	1:58537332-58545048	wt	Mo	OK	0.549551	1.60619	2.15574	1.54731	1.2276	0.00285	0.0357599	yes
ENSDARG00000095515	sdccag3	5:50553349-50562508	wt	Mo	OK	10.6613	3.78018	14.4415	-1.49586	-3.37937	5e-05	0.00153795	yes
ENSDARG00000016856	pon2	16:24754850-24757887	wt	Mo	OK	7.67031	2.6898	10.3601	-1.51178	-3.37902	5e-05	0.00153795	yes
ENSDARG00000102899	cremb	24:31411383-31431309	wt	Mo	OK	0.806473	0.159933	0.966406	-2.33416	-1.29064	0.0026	0.0335333	yes
ENSDARG00000041569	ces2	18:17419403-17426543	wt	Mo	OK	7.63781	2.66849	10.3063	-1.51714	-2.55591	5e-05	0.00153795	yes
ENSDARG00000102986	csf1ra	14:3170815-3202049	wt	Mo	OK	0.88601	0.433001	1.31901	-1.03295	-1.89297	0.00155	0.0227929	yes
ENSDARG00000102946	si:ch73-167f10.1	3:45233846-45237689	wt	Mo	OK	25.2235	8.67526	33.8988	-1.53979	-3.49005	5e-05	0.00153795	yes
ENSDARG00000071644	si:dkey-19a16.7	22:6457712-6469209	wt	Mo	OK	14.417	4.91035	19.3273	-1.55387	-4.92938	5e-05	0.00153795	yes
ENSDARG00000061120	slc43a2b	10:24335028-24422264	wt	Mo	OK	20.0569	6.74316	26.8001	-1.5726	-4.49092	5e-05	0.00153795	yes
ENSDARG00000070047	rgs4	6:35378841-35383561	wt	Mo	OK	9.51914	3.15989	12.679	-1.59096	-4.31608	5e-05	0.00153795	yes
ENSDARG00000103092	grem2b	12:47545973-47560418	wt	Mo	OK	4.31419	2.22697	6.54116	-0.954006	-1.77981	0.00305	0.03758	yes
ENSDARG00000020364	fbp1b	5:34858036-34887800	wt	Mo	OK	34.97	11.5648	46.5348	-1.59638	-2.34142	0.00205	0.0279355	yes
ENSDARG00000103146	nlrc3	24:37559361-37596409	wt	Mo	OK	0.285808	1.00787	1.29368	1.81818	1.28172	0.0042	0.0471006	yes
ENSDARG00000008931	renbp	8:36998539-37011466	wt	Mo	OK	8.72234	2.87725	11.5996	-1.60003	-4.18581	5e-05	0.00153795	yes
ENSDARG00000103195	dync1i2b	6:3771605-3795958	wt	Mo	OK	2.96579	1.49483	4.46062	-0.988437	-2.26068	0.0003	0.00678651	yes
ENSDARG00000021184	rbfox1l	16:31944538-31963980	wt	Mo	OK	9.46654	3.02085	12.4874	-1.64788	-2.47123	5e-05	0.00153795	yes
ENSDARG00000103308	mst1	6:53393745-53426394	wt	Mo	OK	2.40949	1.16834	3.57783	-1.04427	-2.28786	0.0002	0.00492144	yes
ENSDARG00000103340	clic1	19:17470262-17477984	wt	Mo	OK	2.51267	4.09589	6.60856	0.704956	1.68086	0.00425	0.0475056	yes
ENSDARG00000092170	apoc1	16:24057093-24058689	wt	Mo	OK	144.395	45.7912	190.186	-1.65687	-5.35691	5e-05	0.00153795	yes
ENSDARG00000103519	adamts1	1:677012-686023	wt	Mo	OK	0.43762	0.939885	1.3775	1.10281	2.21519	5e-05	0.00153795	yes
ENSDARG00000061257	zgc:153240	3:26200371-26211134	wt	Mo	OK	14.9433	4.70708	19.6504	-1.66659	-3.82978	5e-05	0.00153795	yes
ENSDARG00000099743	zgc:113019	21:7570436-7575494	wt	Mo	OK	14.954	4.67953	19.6335	-1.67609	-4.82693	5e-05	0.00153795	yes
ENSDARG00000103589	gata6	2:4366259-4376938	wt	Mo	OK	4.22295	1.38253	5.60548	-1.61094	-3.43657	5e-05	0.00153795	yes
ENSDARG00000041490	afp4	16:45937436-45943334	wt	Mo	OK	126.207	39.398	165.605	-1.6796	-5.18465	5e-05	0.00153795	yes
ENSDARG00000103665	BRPF1	8:54034355-54053810	wt	Mo	OK	2.96313	5.0516	8.01473	0.769618	2.29948	0.0002	0.00492144	yes
ENSDARG00000016771	tfa	2:17112043-17123598	wt	Mo	OK	116.558	35.6045	152.163	-1.71091	-4.83453	5e-05	0.00153795	yes
ENSDARG00000103712	plpp7	5:63687580-63697617	wt	Mo	OK	0.691236	1.28165	1.97289	0.890751	1.72851	0.00355	0.0418993	yes
ENSDARG00000000551	slc1a4	13:24300769-24317047	wt	Mo	OK	9.13097	2.78468	11.9156	-1.71326	-4.98074	5e-05	0.00153795	yes
ENSDARG00000103755	si:dkeyp-4c4.1	4:39287489-39324901	wt	Mo	OK	3.50759	1.54248	5.05007	-1.18523	-2.67881	5e-05	0.00153795	yes
ENSDARG00000044125	txn	7:24086073-24093669	wt	Mo	OK	33.7485	10.0514	43.7999	-1.74743	-4.54135	5e-05	0.00153795	yes
ENSDARG00000008637	mtp	1:11419100-11439741	wt	Mo	OK	21.8987	6.40703	28.3057	-1.77311	-5.46915	5e-05	0.00153795	yes
ENSDARG00000088764	lyplal1	16:2399786-2412709	wt	Mo	OK	7.86526	2.30071	10.166	-1.77342	-3.02447	5e-05	0.00153795	yes
ENSDARG00000095863	afp4	16:45947763-45950606	wt	Mo	OK	471.814	137.601	609.415	-1.77773	-5.90518	5e-05	0.00153795	yes
ENSDARG00000053269	slc2a15b	1:30840656-30865849	wt	Mo	OK	9.45466	2.64448	12.0991	-1.83804	-4.73552	5e-05	0.00153795	yes
ENSDARG00000015662	pla2g12b	13:4543111-4555009	wt	Mo	OK	43.1857	11.857	55.0427	-1.86481	-5.77387	5e-05	0.00153795	yes
ENSDARG00000022767	apobb.1	20:31330043-31405926	wt	Mo	OK	235.885	63.0155	298.9	-1.90431	-5.65722	5e-05	0.00153795	yes
ENSDARG00000101324	apoa1b	15:31388-33853	wt	Mo	OK	347.023	91.8838	438.907	-1.91715	-6.52763	5e-05	0.00153795	yes
ENSDARG00000035602	dao.1	5:19684637-19691550	wt	Mo	OK	22.6751	6.0005	28.6756	-1.91795	-5.47332	5e-05	0.00153795	yes
ENSDARG00000016598	ckmt1	25:21732228-21750005	wt	Mo	OK	22.198	5.69159	27.8896	-1.96353	-5.59209	5e-05	0.00153795	yes
ENSDARG00000104077	fcer1gl	2:57505216-57512999	wt	Mo	OK	3.42682	1.27142	4.69824	-1.43043	-2.01021	0.00235	0.0310825	yes
ENSDARG00000015866	apoa2	16:24063945-24065322	wt	Mo	OK	309.332	78.3909	387.723	-1.9804	-6.42059	5e-05	0.00153795	yes
ENSDARG00000006427	fabp2	1:25157401-25160746	wt	Mo	OK	135.643	33.6497	169.293	-2.01115	-6.58437	5e-05	0.00153795	yes
ENSDARG00000104108	slco1d1	4:76004965-76047519	wt	Mo	OK	1.36632	0.652866	2.01919	-1.06544	-1.80836	0.00095	0.0162469	yes
ENSDARG00000104125	ttc6	17:10102341-10153732	wt	Mo	OK	1.82932	0.89786	2.72718	-1.02675	-1.78897	0.0039	0.0445841	yes
ENSDARG00000101729	si:dkey-82i20.5	4:49429386-49608084	wt	Mo	OK	26.9766	6.61149	33.5881	-2.02866	-4.59336	5e-05	0.00153795	yes
ENSDARG00000059227	fabp1b.1	8:933677-940431	wt	Mo	OK	226.469	54.8916	281.361	-2.04466	-6.25185	5e-05	0.00153795	yes
ENSDARG00000104207	pcyt1bb	21:40595567-40607603	wt	Mo	OK	1.51458	0.420418	1.935	-1.84902	-2.67919	0.0003	0.00678651	yes
ENSDARG00000102241	zgc:136410	21:44510840-44518121	wt	Mo	OK	34.7863	8.42144	43.2077	-2.04638	-5.29762	5e-05	0.00153795	yes
ENSDARG00000093549	sepp1a	8:31426219-31434102	wt	Mo	OK	51.0811	11.9928	63.0739	-2.09063	-6.47091	5e-05	0.00153795	yes
ENSDARG00000104292	ctgfb	19:13934461-13946435	wt	Mo	OK	1.41659	0.4928	1.90939	-1.52335	-2.20473	0.00075	0.0137623	yes
ENSDARG00000104297	si:ch73-380l10.2	7:50491023-50498396	wt	Mo	OK	6.68707	1.82672	8.51379	-1.87212	-2.73078	0.00025	0.00588102	yes
ENSDARG00000104340	rspo1	16:33819620-33852360	wt	Mo	OK	0.235695	1.39536	1.63105	2.56565	3.80434	5e-05	0.00153795	yes
ENSDARG00000040298	apoa4b.1	16:23999037-24033538	wt	Mo	OK	49.8369	11.5557	61.3926	-2.10861	-4.25977	5e-05	0.00153795	yes
ENSDARG00000104549	arhgap44	12:48497268-48550367	wt	Mo	OK	1.87145	0.950578	2.82203	-0.977283	-1.89303	0.00145	0.0219063	yes
ENSDARG00000104566	foxi1	12:43916242-43918010	wt	Mo	OK	6.48273	3.49979	9.98252	-0.889333	-2.27493	0.00025	0.00588102	yes
ENSDARG00000104576	si:ch211-152c8.5	24:2827465-2830305	wt	Mo	OK	2.01343	0.943588	2.95702	-1.09342	-2.39769	0.0002	0.00492144	yes
ENSDARG00000101160	apoa4a	19:10927027-10931909	wt	Mo	OK	22.8906	5.29344	28.184	-2.11248	-5.18077	5e-05	0.00153795	yes
ENSDARG00000104719	abcc1	3:36571623-36602104	wt	Mo	OK	3.44624	5.78563	9.23187	0.747453	2.02144	0.0002	0.00492144	yes
ENSDARG00000104733	coq4	5:53769610-53777426	wt	Mo	OK	3.67059	1.79876	5.46935	-1.02901	-2.15644	0.0003	0.00678651	yes
ENSDARG00000104742	CABZ01057488.2	7:68795417-68810879	wt	Mo	OK	2.55954	0.621951	3.18149	-2.04101	-3.0945	5e-05	0.00153795	yes
ENSDARG00000012076	apoa1a	5:37378347-37397635	wt	Mo	OK	467.592	106.372	573.964	-2.13614	-6.36189	5e-05	0.00153795	yes
ENSDARG00000019096	myl7	8:40417521-40425350	wt	Mo	OK	8.31916	1.81928	10.1384	-2.19307	-2.77829	0.00015	0.00390457	yes
ENSDARG00000104817	ryroxd1	4:70493381-70516961	wt	Mo	OK	1.85558	3.45402	5.3096	0.896403	2.08322	0.00045	0.00927217	yes
ENSDARG00000104822	znf1131	4:61330858-61335738	wt	Mo	OK	3.00062	1.70602	4.70664	-0.814623	-1.74154	0.0037	0.0429874	yes
ENSDARG00000042780	apoba	17:30687104-30711003	wt	Mo	OK	24.2892	5.24093	29.5301	-2.21242	-7.2983	5e-05	0.00153795	yes
ENSDARG00000024746	hsp90aa1.2	20:54177900-54222597	wt	Mo	OK	31.7959	6.84866	38.6446	-2.21495	-6.94312	5e-05	0.00153795	yes
ENSDARG00000104919	si:ch211-153b23.3	14:11124781-11132075	wt	Mo	OK	0.566824	1.48952	2.05634	1.39387	2.75187	0.0001	0.00278989	yes
ENSDARG00000099200	zgc:123103	19:42978261-42981901	wt	Mo	OK	16.8039	3.54032	20.3442	-2.24684	-5.23671	5e-05	0.00153795	yes
ENSDARG00000020866	apoa4b.2	16:23999037-24033538	wt	Mo	OK	31.3328	6.47136	37.8042	-2.27553	-3.30501	5e-05	0.00153795	yes
ENSDARG00000071601	pvalb9	12:17574232-17576643	wt	Mo	OK	60.0344	12.3754	72.4098	-2.27831	-6.42608	5e-05	0.00153795	yes
ENSDARG00000105208	TM6SF2 (1 of many)	2:57136652-57156096	wt	Mo	OK	6.95003	2.44148	9.39151	-1.50926	-3.85505	5e-05	0.00153795	yes
ENSDARG00000090268	krtt1c19e	19:5422877-5429446	wt	Mo	OK	9.16139	1.85472	11.0161	-2.30436	-4.30855	5e-05	0.00153795	yes
ENSDARG00000105287	mpp1	21:36291731-36338761	wt	Mo	OK	3.90327	2.66171	6.56498	-0.552333	-1.70868	0.00255	0.0330129	yes
ENSDARG00000075480	si:dkey-63d15.12	8:39617165-39620895	wt	Mo	OK	8.65652	1.62679	10.2833	-2.41176	-3.03765	5e-05	0.00153795	yes
ENSDARG00000041065	hspb1	5:3238283-3255083	wt	Mo	OK	31.7567	5.54344	37.3001	-2.51821	-6.07717	5e-05	0.00153795	yes
ENSDARG00000105389	mmel1	11:40266602-40341723	wt	Mo	OK	0.862451	0.317935	1.18039	-1.43971	-1.2709	0.0033	0.0396324	yes
ENSDARG00000097973	si:ch1073-190k2.1	15:46098134-46100286	wt	Mo	OK	11.5726	1.86121	13.4338	-2.63641	-4.27399	5e-05	0.00153795	yes
ENSDARG00000105411	si:ch211-113d11.5	14:47233711-47313867	wt	Mo	OK	1.95194	0.648405	2.60034	-1.58994	-2.5166	0.0001	0.00278989	yes
ENSDARG00000105442	si:cabz01100188.1	11:44203380-44210756	wt	Mo	OK	1.54437	0.364538	1.90891	-2.08288	-2.21515	0.00445	0.0490676	yes
ENSDARG00000051939	pcxb	7:60151877-60525938	wt	Mo	OK	14.0149	2.19012	16.205	-2.67788	-5.92159	5e-05	0.00153795	yes
ENSDARG00000104814	wu:fc46h12	2:7684711-7693267	wt	Mo	OK	20.3528	2.99362	23.3464	-2.76527	-6.15771	5e-05	0.00153795	yes
ENSDARG00000025338	hagh	3:18606425-18642794	wt	Mo	OK	16.6986	2.36313	19.0617	-2.82096	-3.49772	5e-05	0.00153795	yes
ENSDARG00000102019	si:rp71-1h20.3	21:2077004-2124466	wt	Mo	OK	280.774	6.76981	287.544	-5.37415	-13.951	5e-05	0.00153795	yes
ENSDARG00000105556	BX005073.1	7:46872638-46874493	wt	Mo	OK	1.29222	3.52231	4.81453	1.44666	2.20003	0.0007	0.0130978	yes
ENSDARG00000105558	btr07	7:15979389-15985888	wt	Mo	OK	0.867201	3.5094	4.3766	2.01679	4.17177	5e-05	0.00153795	yes

## Sheet: DEG_vsxKO_MO (1795)
gene_id	gene	locus	sample_1	sample_2	status	value_1	value_2	V1+V2	log2.fold_change	test_stat	p_value	q_value	significant
ENSDARG00000087015	Metazoa_SRP	20:10066164-10066461	mut	Mo	OK	126.851	0	126.851	#NAME?	#NAME?	5e-05	0.000738265	yes
ENSDARG00000088388	si:ch73-6l19.2	8:50754328-50789104	mut	Mo	OK	0	33.3803	33.3803	inf	#NAME?	5e-05	0.000738265	yes
ENSDARG00000098970	si:dkey-23a13.10	7:5791382-5791882	mut	Mo	OK	0.264902	98.8617	99.1266	8.54381	5.19278	0.0026	0.0188503	yes
ENSDARG00000089684	si:ch211-113a14.17	25:35788569-35788881	mut	Mo	OK	0.744869	197.264	198.009	8.04892	3.91173	0.0026	0.0188503	yes
ENSDARG00000000503	stx1b	19:5241819-5338213	mut	Mo	OK	1.82917	0.993838	2.82301	-0.880107	-2.44921	5e-05	0.000738265	yes
ENSDARG00000087236	HIST1H4B	25:35812927-35813239	mut	Mo	OK	4.50415	272.782	277.286	5.92035	8.73992	5e-05	0.000738265	yes
ENSDARG00000095893	si:dkey-85n7.7	20:27323758-27326788	mut	Mo	OK	0.382903	12.907	13.2899	5.07504	2.98283	5e-05	0.000738265	yes
ENSDARG00000000767	spi1b	7:32358523-32388203	mut	Mo	OK	4.10536	2.13607	6.24143	-0.942548	-1.47737	0.00905	0.0485913	yes
ENSDARG00000000796	nr4a1	23:32224791-32236279	mut	Mo	OK	0.731446	1.81871	2.55016	1.31409	1.94208	0.00155	0.0125124	yes
ENSDARG00000036700	si:ch211-114n24.6	6:6832284-6835877	mut	Mo	OK	0.666503	16.5279	17.1944	4.63215	8.67404	5e-05	0.000738265	yes
ENSDARG00000000830	telo2	24:37911920-37935591	mut	Mo	OK	4.12463	5.6711	9.79573	0.459363	1.51559	0.0083	0.045608	yes
ENSDARG00000058873	ptpdc1b	23:4434434-4470767	mut	Mo	OK	0.768538	16.265	17.0335	4.40351	6.84862	5e-05	0.000738265	yes
ENSDARG00000001354	slc6a13l	6:41146666-41163481	mut	Mo	OK	2.81013	0.962241	3.77237	-1.54617	-3.5674	5e-05	0.000738265	yes
ENSDARG00000079403	si:dkey-204l11.1	5:34923255-34940827	mut	Mo	OK	2.094	43.6765	45.7705	4.38252	14.3919	5e-05	0.000738265	yes
ENSDARG00000095252	si:dkey-40h20.1	24:21977062-22395695	mut	Mo	OK	1.15073	19.2062	20.3569	4.06096	4.89618	5e-05	0.000738265	yes
ENSDARG00000001776	stim2b	7:62009971-62129710	mut	Mo	OK	2.75205	1.77408	4.52613	-0.633437	-1.95338	0.0008	0.00734984	yes
ENSDARG00000001782	prkacba	11:8119828-8141055	mut	Mo	OK	1.12144	0.45001	1.57145	-1.31733	-1.74723	0.00225	0.0168401	yes
ENSDARG00000102334	si:ch211-124n19.2	9:56542460-56596681	mut	Mo	OK	1.28271	21.2537	22.5364	4.05045	4.44274	5e-05	0.000738265	yes
ENSDARG00000078994	muc2.2	25:8239884-8274712	mut	Mo	OK	1.84446	27.2507	29.0952	3.88502	10.4949	5e-05	0.000738265	yes
ENSDARG00000001880	stx3a	14:21401883-21454101	mut	Mo	OK	5.34632	3.61282	8.95914	-0.565422	-1.50259	0.0054	0.033051	yes
ENSDARG00000044488	pak1ip1	24:36270672-36287293	mut	Mo	OK	5.90685	85.5915	91.4984	3.85701	12.5836	5e-05	0.000738265	yes
ENSDARG00000103788	si:rp71-1d10.6	14:24755564-24758551	mut	Mo	OK	1.51858	19.754	21.2726	3.70135	6.73563	5e-05	0.000738265	yes
ENSDARG00000001999	adamts18	7:42124936-42212627	mut	Mo	OK	3.58035	6.10281	9.68316	0.769373	2.84691	5e-05	0.000738265	yes
ENSDARG00000002002	lmcd1	22:39110326-39121442	mut	Mo	OK	2.76653	4.82997	7.5965	0.80394	1.76845	0.0016	0.0128266	yes
ENSDARG00000002210	stk25a	6:27051026-27067150	mut	Mo	OK	3.91942	2.28136	6.20078	-0.780746	-1.43112	0.007	0.0401546	yes
ENSDARG00000102113	si:ch211-193l2.7	11:41449984-41453173	mut	Mo	OK	1.06306	11.6067	12.6698	3.44867	5.23819	5e-05	0.000738265	yes
ENSDARG00000002293	si:ch211-197g15.9	22:17435605-17474535	mut	Mo	OK	4.00082	0.895837	4.89666	-2.15899	-3.17526	0.0001	0.00134605	yes
ENSDARG00000002298	ankrd22	12:17032780-17036761	mut	Mo	OK	2.05832	1.03555	3.09387	-0.991061	-1.71207	0.00705	0.0402817	yes
ENSDARG00000002299	arsh	9:56225933-56244631	mut	Mo	OK	1.60435	3.00305	4.6074	0.904439	2.21045	0.00025	0.00293113	yes
ENSDARG00000006588	zgc:111983	1:44472117-44476098	mut	Mo	OK	0.993811	10.8314	11.8252	3.44611	4.89767	5e-05	0.000738265	yes
ENSDARG00000070285	si:ch211-113a14.21	25:35796147-35796459	mut	Mo	OK	29.3169	309.798	339.115	3.40152	8.56002	5e-05	0.000738265	yes
ENSDARG00000069282	bbc3	15:23809951-23826315	mut	Mo	OK	1.02709	9.63205	10.6591	3.22928	9.40386	5e-05	0.000738265	yes
ENSDARG00000002405	si:ch211-225b11.1	5:20282966-20310868	mut	Mo	OK	2.99398	6.92162	9.9156	1.20904	4.15126	5e-05	0.000738265	yes
ENSDARG00000002463	arhgef37	14:24543423-24576409	mut	Mo	OK	2.71605	4.2716	6.98765	0.653267	2.05364	0.0008	0.00734984	yes
ENSDARG00000070280	zgc:173652	25:35798681-35799293	mut	Mo	OK	21.1934	194.003	215.196	3.19439	9.72269	5e-05	0.000738265	yes
ENSDARG00000002546	rundc3ab	12:9779596-9802976	mut	Mo	OK	1.80152	1.08882	2.89034	-0.726453	-1.7658	0.00215	0.0162528	yes
ENSDARG00000095377	si:ch211-28e16.4	23:22649672-22679364	mut	Mo	OK	1.07862	9.5143	10.5929	3.14091	3.81359	5e-05	0.000738265	yes
ENSDARG00000099123	si:dkey-23a13.14	7:5835289-5835950	mut	Mo	OK	58.7337	475.683	534.417	3.01774	11.374	5e-05	0.000738265	yes
ENSDARG00000002597	pabpc1l	8:45326435-45344091	mut	Mo	OK	0.42904	1.19262	1.62166	1.47495	1.55784	0.0007	0.00664197	yes
ENSDARG00000002663	optn	4:8007827-8018689	mut	Mo	OK	4.16167	2.70193	6.8636	-0.623174	-1.81028	0.00165	0.0131004	yes
ENSDARG00000002707	her11	14:30198167-30200653	mut	Mo	OK	1.20922	3.92315	5.13237	1.69794	2.93047	5e-05	0.000738265	yes
ENSDARG00000105418	si:ch73-368j24.7	7:6279683-6280174	mut	Mo	OK	10.8576	78.5348	89.3924	2.85463	7.71416	5e-05	0.000738265	yes
ENSDARG00000002748	sema6d	19:390089-417174	mut	Mo	OK	2.10436	4.01696	6.12132	0.932726	2.37268	0.00015	0.00190953	yes
ENSDARG00000076554	cdkn1a	22:565658-570089	mut	Mo	OK	4.12601	27.0043	31.1303	2.71037	7.20907	5e-05	0.000738265	yes
ENSDARG00000005574	vsx2	17:31635676-31642707	mut	Mo	OK	16.0733	101.949	118.022	2.66511	10.0117	5e-05	0.000738265	yes
ENSDARG00000035559	tp53	5:23582426-23594005	mut	Mo	OK	51.8697	323.265	375.135	2.63975	8.96901	5e-05	0.000738265	yes
ENSDARG00000002831	col4a4	15:36093918-36254825	mut	Mo	OK	2.08635	0.6297	2.71605	-1.72824	-1.51838	0.00655	0.0382428	yes
ENSDARG00000002840	si:dkey-28b4.8	1:43950423-44002958	mut	Mo	OK	3.6582	1.55356	5.21176	-1.23555	-3.99932	5e-05	0.000738265	yes
ENSDARG00000002947	abcd3b	2:15440937-15456922	mut	Mo	OK	5.71007	3.71359	9.42366	-0.620695	-1.948	0.00035	0.00382708	yes
ENSDARG00000002968	a1cf	12:6126861-6144310	mut	Mo	OK	2.42981	1.61621	4.04602	-0.588224	-1.52171	0.0087	0.0471494	yes
ENSDARG00000089044	si:ch211-113a14.10	25:35783062-35783374	mut	Mo	OK	95.5593	574.304	669.863	2.58735	6.86023	5e-05	0.000738265	yes
ENSDARG00000093639	si:dkey-90a24.1	5:24067949-24208605	mut	Mo	OK	1.67407	9.84787	11.5219	2.55645	3.00176	0.0048	0.0302092	yes
ENSDARG00000003081	mybphb	6:55022625-55070995	mut	Mo	OK	1.44697	0.534137	1.98111	-1.43775	-1.3959	0.00095	0.00847242	yes
ENSDARG00000098058	im:7150988	14:3260217-3264807	mut	Mo	OK	14.3628	82.9049	97.2677	2.52912	7.94908	5e-05	0.000738265	yes
ENSDARG00000036895	dap1b	9:52812378-52951072	mut	Mo	OK	8.47196	48.4848	56.9568	2.51677	3.66552	5e-05	0.000738265	yes
ENSDARG00000051736	zgc:114037	25:35778804-35779286	mut	Mo	OK	10.0229	53.0826	63.1055	2.40494	5.91615	5e-05	0.000738265	yes
ENSDARG00000034503	per2	2:48455429-48521197	mut	Mo	OK	2.39814	12.3978	14.7959	2.3701	8.2819	5e-05	0.000738265	yes
ENSDARG00000058325	casp8	6:12811026-12821868	mut	Mo	OK	3.72716	18.7876	22.5148	2.33363	7.45744	5e-05	0.000738265	yes
ENSDARG00000003208	pomk	13:9216825-9226400	mut	Mo	OK	0.89449	1.64083	2.53532	0.875289	2.35339	5e-05	0.000738265	yes
ENSDARG00000096100	si:dkey-254e13.13	4:59048769-59056394	mut	Mo	OK	7.18968	35.9263	43.116	2.32104	6.42679	5e-05	0.000738265	yes
ENSDARG00000045768	cry1aa	4:12014192-12027687	mut	Mo	OK	5.69682	27.8404	33.5372	2.28895	8.13099	5e-05	0.000738265	yes
ENSDARG00000003281	pik3ip1	5:20362771-20375727	mut	Mo	OK	2.52455	5.3558	7.88035	1.08507	3.05911	5e-05	0.000738265	yes
ENSDARG00000003420	chrna5	18:40496136-40518814	mut	Mo	OK	0.681516	2.43374	3.11526	1.83636	3.45809	5e-05	0.000738265	yes
ENSDARG00000078567	lonrf1l	8:13605280-13750606	mut	Mo	OK	5.24938	24.8687	30.1181	2.24411	6.65026	5e-05	0.000738265	yes
ENSDARG00000098881	si:dkey-238i5.3	11:30791617-30939791	mut	Mo	OK	1.91201	9.05765	10.9697	2.24405	2.78106	5e-05	0.000738265	yes
ENSDARG00000025859	lmf2b	4:9477583-9501930	mut	Mo	OK	2.51427	11.8177	14.332	2.23274	6.99469	5e-05	0.000738265	yes
ENSDARG00000033443	mdm2	4:23404713-23415116	mut	Mo	OK	26.1033	122.14	148.243	2.22623	5.0768	5e-05	0.000738265	yes
ENSDARG00000094300	NUPR2	5:1732439-1734163	mut	Mo	OK	29.5949	131.905	161.5	2.15608	7.55579	5e-05	0.000738265	yes
ENSDARG00000003706	ryr2b	17:19989295-20098408	mut	Mo	OK	0.770595	0.166764	0.937359	-2.20817	-5.62271	5e-05	0.000738265	yes
ENSDARG00000003732	mitfa	6:43392850-43435741	mut	Mo	OK	3.7608	2.00695	5.76775	-0.906036	-2.12235	0.00045	0.00467053	yes
ENSDARG00000003820	nr1d2a	16:49879774-49907024	mut	Mo	OK	0.698979	1.83098	2.52996	1.3893	1.65949	0.0018	0.0140726	yes
ENSDARG00000098087	si:dkey-30f3.2	4:62012128-62300828	mut	Mo	OK	3.45149	14.3957	17.8472	2.06035	3.26702	5e-05	0.000738265	yes
ENSDARG00000003925	cx28.6	17:14703831-14704666	mut	Mo	OK	1.93211	0.663414	2.59552	-1.54219	-1.99912	0.00415	0.026989	yes
ENSDARG00000003931	cndp2	19:21216736-21238776	mut	Mo	OK	4.217	2.48077	6.69777	-0.765431	-2.15525	0.00015	0.00190953	yes
ENSDARG00000102572	si:ch211-260e23.9	7:45731082-45737495	mut	Mo	OK	6.73284	27.7539	34.4867	2.0434	6.0034	5e-05	0.000738265	yes
ENSDARG00000058365	hspb8	5:15319430-15340268	mut	Mo	OK	4.43014	17.8301	22.2602	2.00889	5.03955	5e-05	0.000738265	yes
ENSDARG00000020711	rrm2	20:29589589-29596547	mut	Mo	OK	15.6667	60.7188	76.3855	1.95444	5.43145	5e-05	0.000738265	yes
ENSDARG00000076667	ccng1	14:21831850-21842968	mut	Mo	OK	309.612	1165.91	1475.52	1.91292	6.85244	5e-05	0.000738265	yes
ENSDARG00000101249	HIST2H4A	7:5837555-5838171	mut	Mo	OK	285.282	1060.23	1345.51	1.89392	7.12134	5e-05	0.000738265	yes
ENSDARG00000103310	znf1053	4:51229597-51238471	mut	Mo	OK	3.89238	14.3307	18.2231	1.88038	5.49566	5e-05	0.000738265	yes
ENSDARG00000005772	tsr2	8:8302492-8311092	mut	Mo	OK	21.556	77.9655	99.5215	1.85475	6.7544	5e-05	0.000738265	yes
ENSDARG00000004115	mgat4b	14:16178272-16448609	mut	Mo	OK	0.975154	1.93239	2.90754	0.986682	2.44558	5e-05	0.000738265	yes
ENSDARG00000004141	zgc:92630	15:15479600-15501508	mut	Mo	OK	4.67659	1.25732	5.93391	-1.89511	-4.14541	5e-05	0.000738265	yes
ENSDARG00000051718	si:ch211-113a14.24	25:35818738-35819338	mut	Mo	OK	16.0846	57.9946	74.0792	1.85024	5.53174	5e-05	0.000738265	yes
ENSDARG00000102379	si:zfos-80g12.1	14:30579943-30605000	mut	Mo	OK	2.89687	10.3083	13.2052	1.83124	5.81674	5e-05	0.000738265	yes
ENSDARG00000004256	wnt11	5:35913451-35919964	mut	Mo	OK	1.80569	2.96923	4.77492	0.717533	1.84866	0.00145	0.0118317	yes
ENSDARG00000099920	si:dkey-23a13.19	7:5846577-5847344	mut	Mo	OK	9.73747	34.3667	44.1042	1.81939	5.49122	5e-05	0.000738265	yes
ENSDARG00000026281	lyrm1	24:39556026-39630783	mut	Mo	OK	3.21834	11.2397	14.458	1.80422	3.3706	5e-05	0.000738265	yes
ENSDARG00000004301	rhogb	21:30900994-30915214	mut	Mo	OK	0.959913	2.03857	2.99848	1.08658	2.30547	0.00035	0.00382708	yes
ENSDARG00000103474	SCARNA6	15:45576284-45622078	mut	Mo	OK	540.134	1862.65	2402.78	1.78596	3.03245	5e-05	0.000738265	yes
ENSDARG00000004363	lhfp	10:32007477-32094403	mut	Mo	OK	3.71821	1.67589	5.3941	-1.14968	-2.99999	5e-05	0.000738265	yes
ENSDARG00000096527	si:dkey-18j14.5	1:30050037-30055593	mut	Mo	OK	4.87371	16.5135	21.3872	1.76055	6.34028	5e-05	0.000738265	yes
ENSDARG00000100434	znf1091	4:62012128-62300828	mut	Mo	OK	2.64815	8.9455	11.5936	1.75618	2.68166	5e-05	0.000738265	yes
ENSDARG00000096310	wu:fj64h06	21:5693388-5731623	mut	Mo	OK	12.1383	40.4888	52.6271	1.73795	5.29108	5e-05	0.000738265	yes
ENSDARG00000000018	nrf1	4:15082629-15104891	mut	Mo	OK	14.5653	47.3061	61.8714	1.69949	6.54074	5e-05	0.000738265	yes
ENSDARG00000004580	nmnat2	2:36043725-36058363	mut	Mo	OK	0.974542	0.492153	1.4667	-0.985617	-1.52944	0.0087	0.0471494	yes
ENSDARG00000105328	si:dkey-23a13.17	7:5842648-5843368	mut	Mo	OK	90.3329	284.981	375.314	1.65754	6.32404	5e-05	0.000738265	yes
ENSDARG00000004597	lrrc4ba	3:30239865-30303174	mut	Mo	OK	0.77149	0.300773	1.07226	-1.35897	-2.58136	5e-05	0.000738265	yes
ENSDARG00000105561	si:dkey-61m24.1	7:27982450-27987433	mut	Mo	OK	2.72848	8.51167	11.2401	1.64134	3.51141	5e-05	0.000738265	yes
ENSDARG00000004647	spice1	24:21185625-21199022	mut	Mo	OK	3.85618	5.69536	9.55154	0.562615	1.7899	0.00265	0.0191329	yes
ENSDARG00000004687	acaa1	24:20180892-20225192	mut	Mo	OK	7.27841	2.55707	9.83548	-1.50913	-4.07885	5e-05	0.000738265	yes
ENSDARG00000097001	si:ch73-233c7.1	16:23101998-23104530	mut	Mo	OK	3.55907	11.0954	14.6545	1.64038	3.93193	5e-05	0.000738265	yes
ENSDARG00000037804	phlda3	23:5822469-5825270	mut	Mo	OK	6.15714	18.5526	24.7097	1.59129	5.17192	5e-05	0.000738265	yes
ENSDARG00000100259	zgc:171759	7:5833512-5834381	mut	Mo	OK	9.32214	28.0471	37.3692	1.58912	4.82367	5e-05	0.000738265	yes
ENSDARG00000096603	bmb	25:35735003-35760296	mut	Mo	OK	5.34161	16.006	21.3476	1.58327	3.10702	5e-05	0.000738265	yes
ENSDARG00000092875	si:dkey-264b2.3	2:59238554-59239737	mut	Mo	OK	4.66612	13.9176	18.5837	1.57661	3.84728	5e-05	0.000738265	yes
ENSDARG00000100531	abhd14b	6:53428848-53435332	mut	Mo	OK	2.78714	8.25585	11.043	1.56663	4.77467	5e-05	0.000738265	yes
ENSDARG00000053554	wdr76	7:29930460-29938640	mut	Mo	OK	12.9858	38.2283	51.2141	1.55771	5.44438	5e-05	0.000738265	yes
ENSDARG00000036844	tsen54	3:60299982-60334005	mut	Mo	OK	4.61582	13.556	18.1718	1.55427	4.75269	5e-05	0.000738265	yes
ENSDARG00000075048	lonrf1	14:33704969-33752430	mut	Mo	OK	5.09598	14.8361	19.9321	1.54168	4.91913	5e-05	0.000738265	yes
ENSDARG00000038585	eif4e2	2:45263737-45282612	mut	Mo	OK	3.14288	9.14529	12.2882	1.54094	4.497	5e-05	0.000738265	yes
ENSDARG00000016056	mhc1laa	8:44448313-44454517	mut	Mo	OK	3.50701	10.0916	13.5986	1.52485	4.61491	5e-05	0.000738265	yes
ENSDARG00000005139	hhatlb	24:20414589-20427751	mut	Mo	OK	0.931949	0.0759346	1.00788	-3.61742	-3.86103	0.0005	0.00507126	yes
ENSDARG00000102806	si:dkey-23a13.16	7:5838843-5839856	mut	Mo	OK	68.5358	193.49	262.026	1.49733	5.58723	5e-05	0.000738265	yes
ENSDARG00000076933	aldh1a3	7:9476220-9557990	mut	Mo	OK	7.95913	21.7582	29.7173	1.45088	5.20365	5e-05	0.000738265	yes
ENSDARG00000002396	cry-dash	24:20049602-20064055	mut	Mo	OK	6.75111	18.3547	25.1058	1.44295	4.99773	5e-05	0.000738265	yes
ENSDARG00000005284	fbxl15	12:45500291-45507532	mut	Mo	OK	0.921562	1.63913	2.56069	0.830781	1.70251	0.0046	0.0291725	yes
ENSDARG00000079783	isg20	25:18997279-19020176	mut	Mo	OK	46.1196	124.926	171.046	1.43762	5.5171	5e-05	0.000738265	yes
ENSDARG00000005320	nipsnap1	5:11532584-11563164	mut	Mo	OK	2.38817	0.616938	3.00511	-1.95271	-3.30336	5e-05	0.000738265	yes
ENSDARG00000005332	lipib	24:23941316-23955958	mut	Mo	OK	0.964789	0.310275	1.27506	-1.63667	-2.03687	0.0022	0.0165586	yes
ENSDARG00000098834	sox4b	16:68068-69930	mut	Mo	OK	3.6795	9.95541	13.6349	1.43597	4.407	5e-05	0.000738265	yes
ENSDARG00000019498	cry5	10:39291387-39362396	mut	Mo	OK	4.97428	13.2915	18.2658	1.41794	1.63419	0.00715	0.0407726	yes
ENSDARG00000091627	si:dkey-271j15.3	16:21324852-21334279	mut	Mo	OK	4.28381	11.4294	15.7132	1.41579	3.61922	5e-05	0.000738265	yes
ENSDARG00000104825	trim35-7	3:5510484-5523471	mut	Mo	OK	5.60947	14.9657	20.5752	1.41572	4.5455	5e-05	0.000738265	yes
ENSDARG00000003244	gbp3	2:44041369-44102997	mut	Mo	OK	6.03612	15.9273	21.9634	1.39981	4.44469	5e-05	0.000738265	yes
ENSDARG00000012499	per1b	7:50547394-50571221	mut	Mo	OK	4.6852	12.3253	17.0105	1.39544	5.27639	5e-05	0.000738265	yes
ENSDARG00000042904	foxo3b	20:32368027-32502572	mut	Mo	OK	10.039	26.0043	36.0433	1.37313	2.91606	5e-05	0.000738265	yes
ENSDARG00000040039	pttg1ipb	9:12684074-12687937	mut	Mo	OK	11.3787	29.342	40.7207	1.36663	4.62482	5e-05	0.000738265	yes
ENSDARG00000105374	si:ch73-368j24.6	7:6231011-6231530	mut	Mo	OK	172.995	434.67	607.665	1.32919	4.46835	5e-05	0.000738265	yes
ENSDARG00000005713	ethe1	16:54445035-54462185	mut	Mo	OK	1.50805	0.71445	2.2225	-1.07777	-1.77812	0.005	0.0312527	yes
ENSDARG00000059816	zgc:136864	1:54324931-54331231	mut	Mo	OK	13.6923	34.2609	47.9532	1.3232	3.17973	5e-05	0.000738265	yes
ENSDARG00000099091	si:ch73-158n7.2	5:57746326-57751492	mut	Mo	OK	5.4155	13.535	18.9505	1.32153	3.42826	5e-05	0.000738265	yes
ENSDARG00000042825	rnf169	15:4964391-4993930	mut	Mo	OK	5.93395	14.8083	20.7422	1.31934	4.57414	5e-05	0.000738265	yes
ENSDARG00000070131	rpp25l	16:41582583-41585681	mut	Mo	OK	2.94925	7.33722	10.2865	1.31488	2.74175	5e-05	0.000738265	yes
ENSDARG00000005842	cd9a	18:7163614-7184958	mut	Mo	OK	3.63622	5.51813	9.15435	0.601741	1.62116	0.00465	0.0294037	yes
ENSDARG00000037837	ogfr	23:565424-575455	mut	Mo	OK	4.54871	11.3134	15.8621	1.3145	4.79407	5e-05	0.000738265	yes
ENSDARG00000029724	pqbp1	8:36550293-36556956	mut	Mo	OK	5.80641	14.3992	20.2056	1.31027	3.55406	5e-05	0.000738265	yes
ENSDARG00000005943	htra4	5:26329908-26353771	mut	Mo	OK	0.82519	0.366767	1.19196	-1.16986	-1.76041	0.00405	0.0264974	yes
ENSDARG00000100456	ptk2aa	19:1844787-1898625	mut	Mo	OK	28.6875	70.7485	99.436	1.30228	1.58993	0.00755	0.0426059	yes
ENSDARG00000044142	acss1	17:25815555-25835531	mut	Mo	OK	8.54098	21.0143	29.5553	1.2989	4.11993	5e-05	0.000738265	yes
ENSDARG00000090182	zgc:110434	25:34639275-34639662	mut	Mo	OK	73.9023	181.474	255.376	1.29607	4.30663	5e-05	0.000738265	yes
ENSDARG00000036494	gstcd	1:49307880-49421777	mut	Mo	OK	3.21299	7.88154	11.0945	1.29456	3.24961	5e-05	0.000738265	yes
ENSDARG00000006025	tp53i11b	18:27457719-27591078	mut	Mo	OK	2.47872	4.03551	6.51423	0.703156	1.59057	0.004	0.0262892	yes
ENSDARG00000006052	malt2	22:15679791-15691627	mut	Mo	OK	2.18878	1.35091	3.53969	-0.696196	-1.82091	0.0018	0.0140726	yes
ENSDARG00000006151	pde11al	16:21338648-21379959	mut	Mo	OK	2.05111	0.717592	2.7687	-1.51517	-2.11223	5e-05	0.000738265	yes
ENSDARG00000077339	ptrh2	10:28420123-28422692	mut	Mo	OK	12.5044	30.6067	43.1111	1.29142	4.33421	5e-05	0.000738265	yes
ENSDARG00000006202	erbb3a	6:7309033-7374942	mut	Mo	OK	5.85059	3.79233	9.64292	-0.625497	-1.18663	0.0093	0.0495353	yes
ENSDARG00000006257	vldlr	10:15296892-15347025	mut	Mo	OK	1.22349	2.20996	3.43345	0.853022	1.46715	0.0082	0.0452159	yes
ENSDARG00000006307	shisa4	11:24640203-24650979	mut	Mo	OK	2.2427	7.37867	9.62137	1.71812	4.78703	5e-05	0.000738265	yes
ENSDARG00000006389	smad2	10:14913016-14985162	mut	Mo	OK	3.63299	6.27	9.90299	0.787309	2.24618	0.0001	0.00134605	yes
ENSDARG00000052789	azin1a	16:52820317-52850806	mut	Mo	OK	9.51609	23.191	32.7071	1.28513	3.36144	5e-05	0.000738265	yes
ENSDARG00000030448	sppl2	2:37498211-37520552	mut	Mo	OK	5.30113	12.9138	18.2149	1.28454	4.5246	5e-05	0.000738265	yes
ENSDARG00000105366	si:ch1073-159d7.10	7:6305342-6306048	mut	Mo	OK	74.6816	181.176	255.858	1.27857	4.834	5e-05	0.000738265	yes
ENSDARG00000042727	exo5	15:25149555-25158761	mut	Mo	OK	11.6315	28.1328	39.7643	1.27421	4.52812	5e-05	0.000738265	yes
ENSDARG00000075467	shisa3	14:46212991-46219704	mut	Mo	OK	12.9987	31.416	44.4147	1.27313	4.9386	5e-05	0.000738265	yes
ENSDARG00000006580	cldnd	21:25740819-25741596	mut	Mo	OK	0.871566	2.1697	3.04127	1.31582	1.73983	0.008	0.0444234	yes
ENSDARG00000007077	si:dkey-145p14.5	9:33049408-33064822	mut	Mo	OK	13.0996	31.5271	44.6267	1.26707	4.48012	5e-05	0.000738265	yes
ENSDARG00000045909	dynlt1	4:372986-376994	mut	Mo	OK	5.08562	12.2342	17.3198	1.26642	1.753	0.00205	0.0156467	yes
ENSDARG00000006760	slc24a3	13:26943450-27079551	mut	Mo	OK	1.0978	0.296146	1.39395	-1.89023	-2.57844	0.00045	0.00467053	yes
ENSDARG00000006775	cass4	11:27498443-27531657	mut	Mo	OK	1.4386	2.13782	3.57642	0.571473	1.51518	0.00885	0.0477389	yes
ENSDARG00000003963	traf4a	15:15580589-15657241	mut	Mo	OK	7.4785	17.9849	25.4634	1.26597	4.64489	5e-05	0.000738265	yes
ENSDARG00000028688	exosc2	5:71352824-71358786	mut	Mo	OK	21.2746	50.5764	71.851	1.24933	4.41506	5e-05	0.000738265	yes
ENSDARG00000006840	gnmt	17:48885684-48899800	mut	Mo	OK	2.79737	1.64854	4.44591	-0.762881	-1.60715	0.00745	0.0421237	yes
ENSDARG00000006848	PARP9	9:23947592-23954611	mut	Mo	OK	3.10535	5.29328	8.39863	0.769403	2.14477	0.00025	0.00293113	yes
ENSDARG00000006978	zak	9:2890882-2930145	mut	Mo	OK	0.746569	1.65616	2.40273	1.1495	1.85905	0.00385	0.0255548	yes
ENSDARG00000015822	sesn3	15:35185037-35234766	mut	Mo	OK	9.77691	23.2316	33.0085	1.24864	4.75234	5e-05	0.000738265	yes
ENSDARG00000002549	eif3eb	19:23039944-23079965	mut	Mo	OK	5.42396	12.7961	18.2201	1.23829	3.48973	5e-05	0.000738265	yes
ENSDARG00000021547	vrk2	13:26573446-26668794	mut	Mo	OK	6.74846	15.8633	22.6118	1.23306	2.73262	5e-05	0.000738265	yes
ENSDARG00000056075	rca2.1	23:26167939-26193747	mut	Mo	OK	7.80111	18.3254	26.1265	1.2321	4.27278	5e-05	0.000738265	yes
ENSDARG00000062788	irg1l	14:11121037-11124596	mut	Mo	OK	4.14149	9.72828	13.8698	1.23203	3.46888	5e-05	0.000738265	yes
ENSDARG00000027826	pudp	1:31608915-31653097	mut	Mo	OK	4.24047	9.92508	14.1655	1.22686	2.85493	5e-05	0.000738265	yes
ENSDARG00000059841	exosc1	1:54006002-54028388	mut	Mo	OK	9.10427	21.2358	30.3401	1.22188	2.20232	0.0005	0.00507126	yes
ENSDARG00000045898	si:ch211-152c2.3	4:828561-831585	mut	Mo	OK	4.51861	10.4049	14.9235	1.20331	3.02183	5e-05	0.000738265	yes
ENSDARG00000007289	METRNL (1 of many)	1:56656254-56668369	mut	Mo	OK	0.425716	1.3795	1.80522	1.69618	2.28239	0.0002	0.00244048	yes
ENSDARG00000007349	dmrt1	5:44344663-44391191	mut	Mo	OK	0.404492	3.07042	3.47491	2.92426	2.77578	5e-05	0.000738265	yes
ENSDARG00000104574	pcsk6	7:8833688-9031807	mut	Mo	OK	5.14185	11.8367	16.9785	1.20291	1.7231	0.00225	0.0168401	yes
ENSDARG00000007370	dysf	7:25287117-25426128	mut	Mo	OK	3.04305	2.02892	5.07197	-0.584805	-1.98814	0.0007	0.00664197	yes
ENSDARG00000096210	znf1050	4:57135125-57353149	mut	Mo	OK	3.35862	7.71145	11.0701	1.19914	2.21775	0.0006	0.00587614	yes
ENSDARG00000007241	mycb	2:32033037-32035153	mut	Mo	OK	5.98383	13.7001	19.6839	1.19505	3.89591	5e-05	0.000738265	yes
ENSDARG00000007396	rnd3b	9:23215454-23222949	mut	Mo	OK	2.79154	0.551268	3.34281	-2.34023	-2.446	0.001	0.00882317	yes
ENSDARG00000007398	lrrk1	7:9318061-9471856	mut	Mo	OK	0.481933	1.18418	1.66611	1.29698	2.11736	0.00115	0.00982707	yes
ENSDARG00000036965	rnf24	1:41066428-41116690	mut	Mo	OK	7.13529	16.3251	23.4604	1.19405	3.08639	5e-05	0.000738265	yes
ENSDARG00000007406	phox2a	15:46976197-46984969	mut	Mo	OK	1.34303	0.477632	1.82066	-1.49152	-3.31138	5e-05	0.000738265	yes
ENSDARG00000007413	arid2	4:1797784-1835034	mut	Mo	OK	3.5611	5.46209	9.02319	0.617133	2.20221	0.00025	0.00293113	yes
ENSDARG00000069654	ppp6r2b	18:6856781-6897029	mut	Mo	OK	4.18384	9.51255	13.6964	1.185	1.84169	0.0013	0.0108473	yes
ENSDARG00000096011	si:dkeyp-4f2.3	4:33326257-33629836	mut	Mo	OK	4.74861	10.7949	15.5435	1.18477	1.89117	0.00185	0.0144116	yes
ENSDARG00000021233	pgls	3:52429892-52445947	mut	Mo	OK	3.33315	7.53131	10.8645	1.17602	3.54109	5e-05	0.000738265	yes
ENSDARG00000105482	si:ch1073-153i20.1	7:6302304-6302727	mut	Mo	OK	812.823	1829.1	2641.92	1.17012	4.54454	5e-05	0.000738265	yes
ENSDARG00000007711	rab3il1	25:2973439-2992370	mut	Mo	OK	3.4677	2.22677	5.69447	-0.639027	-1.669	0.0043	0.0277154	yes
ENSDARG00000102586	zgc:152938	4:71289785-71425823	mut	Mo	OK	15.8091	35.2815	51.0906	1.15816	2.10361	0.0004	0.00422996	yes
ENSDARG00000102482	CYSTM1 (1 of many)	21:31988013-32003396	mut	Mo	OK	6.17791	13.6756	19.8535	1.14641	3.24385	5e-05	0.000738265	yes
ENSDARG00000043781	PSMB10	4:75630954-75641899	mut	Mo	OK	3.92532	8.67105	12.5964	1.1434	3.0221	5e-05	0.000738265	yes
ENSDARG00000037963	nek6	21:8263308-8304813	mut	Mo	OK	5.03406	11.0779	16.112	1.13789	2.47002	5e-05	0.000738265	yes
ENSDARG00000057378	fam213aa	13:18528332-18538583	mut	Mo	OK	6.00353	13.1854	19.1889	1.13506	2.56436	5e-05	0.000738265	yes
ENSDARG00000042881	nthl1	1:53465894-53478130	mut	Mo	OK	3.66748	8.05278	11.7203	1.1347	3.25918	5e-05	0.000738265	yes
ENSDARG00000008026	fam129bb	5:28316727-28369009	mut	Mo	OK	5.01132	2.78803	7.79935	-0.845944	-2.77334	5e-05	0.000738265	yes
ENSDARG00000022858	wnt7ba	4:18712965-18725201	mut	Mo	OK	10.7057	23.4633	34.169	1.13202	3.82938	5e-05	0.000738265	yes
ENSDARG00000008127	pcdh15b	12:6532729-6871872	mut	Mo	OK	1.11885	0.268718	1.38757	-2.05785	-1.39186	0.00045	0.00467053	yes
ENSDARG00000008133	foxl1	18:17494490-17496353	mut	Mo	OK	1.74188	2.72195	4.46383	0.643998	1.56042	0.00805	0.0446439	yes
ENSDARG00000016093	qtrtd1	24:20915266-20946098	mut	Mo	OK	8.50801	18.6349	27.1429	1.13112	3.95198	5e-05	0.000738265	yes
ENSDARG00000043562	zgc:65997	17:23529092-23532044	mut	Mo	OK	4.52451	9.90904	14.4336	1.13098	3.2576	5e-05	0.000738265	yes
ENSDARG00000016649	akr7a3	11:41226228-41241747	mut	Mo	OK	7.87889	17.2463	25.1252	1.13022	1.63091	0.0064	0.0375311	yes
ENSDARG00000039117	tefa	12:19022958-19031303	mut	Mo	OK	69.0673	150.901	219.968	1.12752	4.1505	5e-05	0.000738265	yes
ENSDARG00000008305	hand2	1:37473968-37475834	mut	Mo	OK	3.39189	1.34405	4.73594	-1.3355	-3.01801	5e-05	0.000738265	yes
ENSDARG00000101720	HIST3H3	7:5843963-5844461	mut	Mo	OK	684.423	1490.93	2175.35	1.12325	4.35043	5e-05	0.000738265	yes
ENSDARG00000003132	apip	7:49628706-49635742	mut	Mo	OK	43.7247	95.0586	138.783	1.12037	4.0242	5e-05	0.000738265	yes
ENSDARG00000103038	pik3r3a	2:3085573-3146824	mut	Mo	OK	44.4768	96.3732	140.85	1.11558	3.68734	5e-05	0.000738265	yes
ENSDARG00000103741	BX649620.1	4:31108575-31118245	mut	Mo	OK	7.39105	15.9722	23.3633	1.11171	4.02142	5e-05	0.000738265	yes
ENSDARG00000008407	tspan7b	22:11411022-11463554	mut	Mo	OK	5.90426	3.83177	9.73603	-0.623745	-2.04373	0.00035	0.00382708	yes
ENSDARG00000008433	unc45b	8:11166353-11191818	mut	Mo	OK	2.89267	1.57816	4.47083	-0.87416	-2.04241	5e-05	0.000738265	yes
ENSDARG00000003421	igf2bp2a	9:12497431-12604573	mut	Mo	OK	3.28949	7.03223	10.3217	1.09612	3.46916	5e-05	0.000738265	yes
ENSDARG00000008541	chia.4	23:17999935-18006800	mut	Mo	OK	0.31676	1.81725	2.13401	2.5203	2.39356	0.00165	0.0131004	yes
ENSDARG00000061265	lmln	9:38692750-38707129	mut	Mo	OK	3.28315	7.01794	10.3011	1.09597	3.41683	5e-05	0.000738265	yes
ENSDARG00000095584	si:ch211-218c6.9	18:16989561-16994000	mut	Mo	OK	6.38582	13.6112	19.997	1.09185	2.69758	5e-05	0.000738265	yes
ENSDARG00000008662	fign	9:51310143-51313048	mut	Mo	OK	1.7182	2.86373	4.58193	0.736999	2.03168	0.0007	0.00664197	yes
ENSDARG00000053840	ei24	10:39272733-39287976	mut	Mo	OK	3.85751	8.22127	12.0788	1.09169	3.50902	5e-05	0.000738265	yes
ENSDARG00000092483	iqcc	13:33167887-33171536	mut	Mo	OK	5.80617	12.2785	18.0847	1.08048	3.10892	5e-05	0.000738265	yes
ENSDARG00000009196	anxa3a	5:38487210-38495470	mut	Mo	OK	4.75228	10.0387	14.791	1.07887	3.05956	5e-05	0.000738265	yes
ENSDARG00000104944	si:ch73-36p18.2	25:34615322-34615733	mut	Mo	OK	214.66	448.657	663.317	1.06356	3.96506	5e-05	0.000738265	yes
ENSDARG00000042282	itga6a	9:3458132-3514959	mut	Mo	OK	11.1269	23.2131	34.34	1.06089	3.8361	5e-05	0.000738265	yes
ENSDARG00000008807	bokb	2:22984563-22994784	mut	Mo	OK	2.79362	4.29734	7.09096	0.621306	1.61214	0.00605	0.0359399	yes
ENSDARG00000025074	slc25a10	1:55755084-55765235	mut	Mo	OK	9.66327	20.1527	29.816	1.06039	3.1533	5e-05	0.000738265	yes
ENSDARG00000008931	renbp	8:36998539-37011466	mut	Mo	OK	6.97095	2.89609	9.86704	-1.26725	-3.68662	5e-05	0.000738265	yes
ENSDARG00000008969	fgb	1:9367651-9375385	mut	Mo	OK	3.99531	1.16562	5.16093	-1.77721	-2.46281	5e-05	0.000738265	yes
ENSDARG00000033901	msi2a	10:37556423-37841104	mut	Mo	OK	6.40783	13.327	19.7348	1.05645	1.89834	0.00085	0.00771532	yes
ENSDARG00000089637	rnaseh2c	14:35069008-35074278	mut	Mo	OK	8.55061	17.737	26.2876	1.05266	2.7637	5e-05	0.000738265	yes
ENSDARG00000009018	rhbg	16:29331172-29342541	mut	Mo	OK	2.85467	0.546407	3.40108	-2.38528	-5.71075	5e-05	0.000738265	yes
ENSDARG00000105508	si:dkey-23a13.21	7:5854965-5855595	mut	Mo	OK	228.97	473.96	702.93	1.04961	3.88787	5e-05	0.000738265	yes
ENSDARG00000056438	her9	23:23472968-23474754	mut	Mo	OK	20.6252	42.6594	63.2846	1.04846	3.71284	5e-05	0.000738265	yes
ENSDARG00000006003	mycla	13:35766543-35828850	mut	Mo	OK	19.304	39.8819	59.1859	1.04684	2.97943	5e-05	0.000738265	yes
ENSDARG00000101973	CR769782.2	4:54449704-54628503	mut	Mo	OK	4.13759	8.54124	12.6788	1.04566	3.41621	5e-05	0.000738265	yes
ENSDARG00000009313	zgc:63831	3:24990607-25004561	mut	Mo	OK	3.64741	2.03137	5.67878	-0.844417	-2.16836	0.00025	0.00293113	yes
ENSDARG00000009361	CABZ01077220.1	22:8218308-8228755	mut	Mo	OK	1.73198	0.892264	2.62424	-0.956882	-1.9252	0.00165	0.0131004	yes
ENSDARG00000017388	gstt1b	21:15617119-15624557	mut	Mo	OK	5.55916	11.468	17.0272	1.04468	3.17936	5e-05	0.000738265	yes
ENSDARG00000009401	vcanb	10:43360297-43434580	mut	Mo	OK	1.00639	0.16749	1.17388	-2.58704	-4.85407	5e-05	0.000738265	yes
ENSDARG00000029479	zgc:86609	8:8647544-8660022	mut	Mo	OK	3.91006	8.06263	11.9727	1.04406	3.19007	5e-05	0.000738265	yes
ENSDARG00000020573	ddx3a	9:33523730-33543992	mut	Mo	OK	28.765	58.914	87.679	1.0343	2.0803	0.00035	0.00382708	yes
ENSDARG00000009550	foxi3b	14:34174021-34176273	mut	Mo	OK	3.30865	2.10041	5.40906	-0.655574	-1.67948	0.0046	0.0291725	yes
ENSDARG00000042900	gtpbp1l	22:14811715-14827120	mut	Mo	OK	5.09174	10.3958	15.4875	1.02977	3.57961	5e-05	0.000738265	yes
ENSDARG00000058857	zgc:112052	18:13155578-13164433	mut	Mo	OK	9.28979	18.9067	28.1965	1.02518	3.65884	5e-05	0.000738265	yes
ENSDARG00000077533	eif3f	1:9612915-9619933	mut	Mo	OK	166.428	334.661	501.089	1.0078	3.94342	5e-05	0.000738265	yes
ENSDARG00000090871	si:dkey-210j14.4	3:52413035-52419455	mut	Mo	OK	5.07532	10.1358	15.2111	0.997883	2.81259	5e-05	0.000738265	yes
ENSDARG00000096990	si:ch1073-340i21.2	15:46129707-46140445	mut	Mo	OK	20.4213	40.77	61.1913	0.997435	2.87315	5e-05	0.000738265	yes
ENSDARG00000071345	mgst2	14:47229410-47232807	mut	Mo	OK	16.2085	32.3182	48.5267	0.995599	3.35063	5e-05	0.000738265	yes
ENSDARG00000003462	fech	21:1622165-1644440	mut	Mo	OK	10.2467	20.3644	30.6111	0.990885	3.39972	5e-05	0.000738265	yes
ENSDARG00000034777	txn2	3:5355259-5367200	mut	Mo	OK	12.2968	24.4083	36.7051	0.989088	3.34214	5e-05	0.000738265	yes
ENSDARG00000094154	hist2h3c	25:34546697-34547197	mut	Mo	OK	625.208	1237.73	1862.94	0.985287	3.40161	5e-05	0.000738265	yes
ENSDARG00000010145	tor4aa	10:3323408-3332058	mut	Mo	OK	2.72044	4.96004	7.68048	0.866512	2.37293	5e-05	0.000738265	yes
ENSDARG00000102550	CABZ01080370.1	15:49204-61507	mut	Mo	OK	7.54451	14.9082	22.4527	0.982608	1.66173	0.0038	0.0253294	yes
ENSDARG00000104964	znf1093	4:37854535-37859835	mut	Mo	OK	5.06211	9.99906	15.0612	0.982054	2.91945	5e-05	0.000738265	yes
ENSDARG00000010267	dpydb	2:20167149-20462435	mut	Mo	OK	0.92264	0.4476	1.37024	-1.04356	-2.06128	0.0005	0.00507126	yes
ENSDARG00000010276	ptgs2b	20:34218938-34224536	mut	Mo	OK	2.07204	3.66532	5.73736	0.82289	2.33662	0.00015	0.00190953	yes
ENSDARG00000051734	si:ch211-113a14.16	25:35787200-35787587	mut	Mo	OK	157.262	309.927	467.189	0.978752	3.60819	5e-05	0.000738265	yes
ENSDARG00000010332	zgc:56231	7:58449050-58455392	mut	Mo	OK	0.363681	0.764735	1.12842	1.07229	1.69843	0.00345	0.0235757	yes
ENSDARG00000012138	sgce	19:41451547-41482453	mut	Mo	OK	7.10426	13.9888	21.0931	0.977511	2.92197	5e-05	0.000738265	yes
ENSDARG00000010437	fam46c	9:20969943-20973178	mut	Mo	OK	3.78168	6.09667	9.87835	0.688993	2.03134	0.0004	0.00422996	yes
ENSDARG00000029766	nr1i2	9:9524489-9584607	mut	Mo	OK	4.03089	7.93468	11.9656	0.977073	2.91036	5e-05	0.000738265	yes
ENSDARG00000098535	si:dkey-13a3.5	14:47469009-47629494	mut	Mo	OK	4.16255	8.18216	12.3447	0.975014	1.69306	0.0052	0.0321556	yes
ENSDARG00000010654	ARHGAP42 (1 of many)	18:41853403-41893801	mut	Mo	OK	0.432989	0.836758	1.26975	0.950479	2.20283	0.0003	0.00340471	yes
ENSDARG00000010681	tjap1	13:3851432-4005645	mut	Mo	OK	2.68881	4.38806	7.07687	0.706615	1.81071	0.0025	0.0183242	yes
ENSDARG00000045364	trappc3	19:36135781-36146281	mut	Mo	OK	9.0137	17.6954	26.7091	0.973183	3.1613	5e-05	0.000738265	yes
ENSDARG00000010767	epha4l	15:41944440-42081796	mut	Mo	OK	2.23614	1.34059	3.57673	-0.738139	-2.41148	5e-05	0.000738265	yes
ENSDARG00000054054	zgc:153219	7:32859488-32871859	mut	Mo	OK	4.52934	8.88179	13.4111	0.971552	3.0801	5e-05	0.000738265	yes
ENSDARG00000030723	cldn11b	24:26287499-26296277	mut	Mo	OK	4.30156	8.40732	12.7089	0.966786	3.11667	5e-05	0.000738265	yes
ENSDARG00000004167	zgc:110366	2:7260674-7276843	mut	Mo	OK	7.2159	14.0865	21.3024	0.965064	2.92998	5e-05	0.000738265	yes
ENSDARG00000010918	nprl3	3:54790743-54825140	mut	Mo	OK	2.41671	3.91783	6.33454	0.69701	1.84001	0.00065	0.00626337	yes
ENSDARG00000059835	zfyve27	1:54212081-54230172	mut	Mo	OK	8.13143	15.8661	23.9975	0.964364	2.46641	5e-05	0.000738265	yes
ENSDARG00000010977	rab34b	21:26025756-26035080	mut	Mo	OK	4.47174	1.94771	6.41945	-1.19906	-2.44235	0.0001	0.00134605	yes
ENSDARG00000077205	zgc:153116	4:74885687-74893653	mut	Mo	OK	4.89772	9.51607	14.4138	0.958255	2.89857	5e-05	0.000738265	yes
ENSDARG00000029795	fam213b	11:40358164-40383092	mut	Mo	OK	18.9523	36.8208	55.7731	0.958151	2.97527	5e-05	0.000738265	yes
ENSDARG00000011122	pptc7a	8:4311827-4345475	mut	Mo	OK	1.96688	3.01432	4.9812	0.615922	1.98875	0.00045	0.00467053	yes
ENSDARG00000011273	tlx2	14:5349844-5383529	mut	Mo	OK	1.26083	0.186889	1.44772	-2.75411	-2.42185	0.00065	0.00626337	yes
ENSDARG00000040439	rsl24d1	25:446957-452320	mut	Mo	OK	163.88	317.259	481.139	0.953021	3.74029	5e-05	0.000738265	yes
ENSDARG00000011400	tnnc1a	23:4955107-4960291	mut	Mo	OK	1.99465	0.218378	2.21303	-3.19124	-2.66127	0.0071	0.0405407	yes
ENSDARG00000011410	aadat	7:7444604-7462586	mut	Mo	OK	2.2558	4.58544	6.84124	1.02342	2.3497	0.00015	0.00190953	yes
ENSDARG00000095432	si:rp71-26b20.1	24:1374582-1402807	mut	Mo	OK	5.33158	10.298	15.6296	0.949724	2.92106	5e-05	0.000738265	yes
ENSDARG00000011573	abcb11a	9:49043038-49119634	mut	Mo	OK	3.05695	1.60577	4.66272	-0.928826	-2.80311	5e-05	0.000738265	yes
ENSDARG00000011583	cry1ab	18:15138005-15161184	mut	Mo	OK	3.82699	5.97173	9.79872	0.64194	2.10906	0.00015	0.00190953	yes
ENSDARG00000075508	si:dkey-108k21.10	25:34545426-34546047	mut	Mo	OK	31.2751	60.3735	91.6486	0.948903	3.12121	5e-05	0.000738265	yes
ENSDARG00000015611	rasl11b	20:22900183-23132611	mut	Mo	OK	5.77457	11.1288	16.9034	0.946517	1.88173	0.0013	0.0108473	yes
ENSDARG00000011671	pde6b	21:20319821-20339971	mut	Mo	OK	0.793992	1.37152	2.16551	0.788584	2.15645	0.0003	0.00340471	yes
ENSDARG00000030440	rsrp1	13:45331481-45338401	mut	Mo	OK	21.0349	40.2693	61.3042	0.936896	2.68387	5e-05	0.000738265	yes
ENSDARG00000029133	tubgcp3	1:45714061-45759038	mut	Mo	OK	4.23719	8.11048	12.3477	0.93668	3.27272	5e-05	0.000738265	yes
ENSDARG00000022788	cops7a	16:21947669-21973293	mut	Mo	OK	10.6526	20.3726	31.0252	0.935422	3.04781	5e-05	0.000738265	yes
ENSDARG00000076435	abhd10a	5:67206375-67218144	mut	Mo	OK	3.53106	6.74837	10.2794	0.934437	1.92242	0.00035	0.00382708	yes
ENSDARG00000011809	mical1	23:39569294-39635413	mut	Mo	OK	2.85645	1.65941	4.51586	-0.783547	-1.82172	0.0022	0.0165586	yes
ENSDARG00000011819	pcnx	13:35928105-36008633	mut	Mo	OK	3.34875	5.74287	9.09162	0.778153	2.88156	5e-05	0.000738265	yes
ENSDARG00000052010	fam96b	7:44626547-44631769	mut	Mo	OK	13.8627	26.4915	40.3542	0.93432	2.38336	0.0001	0.00134605	yes
ENSDARG00000011956	dlx4a	3:34540567-34551913	mut	Mo	OK	4.70415	2.69499	7.39914	-0.803652	-1.93639	0.0009	0.0081056	yes
ENSDARG00000099417	CT027611.1	8:30311391-30316584	mut	Mo	OK	5.96344	11.3884	17.3518	0.933349	3.51047	5e-05	0.000738265	yes
ENSDARG00000105277	cnksr3	20:4120324-4196333	mut	Mo	OK	16.113	30.7396	46.8526	0.931873	2.35961	5e-05	0.000738265	yes
ENSDARG00000097493	si:dkey-148h10.5	6:32059287-32072196	mut	Mo	OK	5.9636	11.3729	17.3365	0.931349	2.50238	0.0001	0.00134605	yes
ENSDARG00000100838	BX640584.3	4:50684377-50754643	mut	Mo	OK	3.66774	6.9919	10.6596	0.930793	2.01158	0.0007	0.00664197	yes
ENSDARG00000074768	zgc:113295	3:61303434-61306670	mut	Mo	OK	4.69986	8.94742	13.6473	0.928852	2.76614	5e-05	0.000738265	yes
ENSDARG00000079949	supt16h	7:1415255-1483171	mut	Mo	OK	31.526	59.8892	91.4152	0.925753	3.52367	5e-05	0.000738265	yes
ENSDARG00000012306	syt13	7:38444789-38466460	mut	Mo	OK	1.32655	0.420519	1.74707	-1.65744	-1.47368	0.00565	0.034124	yes
ENSDARG00000070658	zbtb12.2	19:27372134-27380125	mut	Mo	OK	9.94222	18.8661	28.8083	0.924159	3.32797	5e-05	0.000738265	yes
ENSDARG00000012395	mmp13a	10:38649904-38676122	mut	Mo	OK	8.22127	1.45777	9.67904	-2.4956	-6.02289	5e-05	0.000738265	yes
ENSDARG00000012403	ercc6l2	8:29885211-29921589	mut	Mo	OK	3.7856	5.99095	9.77655	0.662262	2.28595	0.0001	0.00134605	yes
ENSDARG00000104483	gipc1	3:44980691-44992541	mut	Mo	OK	5.85294	11.0874	16.9403	0.921693	2.6802	5e-05	0.000738265	yes
ENSDARG00000042837	atp1b3b	15:4362013-4424770	mut	Mo	OK	4.68122	8.76994	13.4512	0.905684	2.84827	5e-05	0.000738265	yes
ENSDARG00000014474	yipf1	2:26943166-26948684	mut	Mo	OK	5.26739	9.85851	15.1259	0.90428	2.37401	5e-05	0.000738265	yes
ENSDARG00000023495	ift74	5:446757-472748	mut	Mo	OK	7.40541	13.8558	21.2612	0.903844	3.09233	5e-05	0.000738265	yes
ENSDARG00000012640	cideb	7:23744349-23751183	mut	Mo	OK	3.93709	1.697	5.63409	-1.21414	-2.34857	0.0001	0.00134605	yes
ENSDARG00000012667	tfap2b	20:48191599-48230662	mut	Mo	OK	3.02255	1.78361	4.80616	-0.760964	-1.54733	0.0051	0.0317293	yes
ENSDARG00000099758	igf2bp2b	1:29639261-29706908	mut	Mo	OK	5.21049	9.72353	14.934	0.90006	1.53671	0.00915	0.0489315	yes
ENSDARG00000017337	zgc:77929	11:11349030-11353365	mut	Mo	OK	3.7842	7.05696	10.8412	0.89906	2.54095	5e-05	0.000738265	yes
ENSDARG00000012726	fam26e.2	16:32251629-32254698	mut	Mo	OK	5.87763	3.24923	9.12686	-0.855135	-2.29041	0.0001	0.00134605	yes
ENSDARG00000027088	ptgdsb.1	24:16877091-16884955	mut	Mo	OK	40.3289	75.1894	115.518	0.898717	3.19348	5e-05	0.000738265	yes
ENSDARG00000012776	smarca1	5:21348913-21384568	mut	Mo	OK	1.02912	1.96122	2.99034	0.930334	1.40088	0.00665	0.0387096	yes
ENSDARG00000012823	dlgap4b	6:1695835-1741322	mut	Mo	OK	1.56905	2.66778	4.23683	0.765752	1.59341	0.00585	0.0350395	yes
ENSDARG00000051735	si:ch211-113a14.18	25:35790147-35790797	mut	Mo	OK	92.8934	173.038	265.931	0.897436	3.33384	5e-05	0.000738265	yes
ENSDARG00000063218	ppm1la	2:6353885-6380628	mut	Mo	OK	11.3428	21.1022	32.445	0.895617	3.33551	5e-05	0.000738265	yes
ENSDARG00000045296	myeov2	24:26139472-26157334	mut	Mo	OK	11.0116	20.4804	31.492	0.895224	1.93282	0.00145	0.0118317	yes
ENSDARG00000053010	lpcat2	7:35114574-35137141	mut	Mo	OK	4.56755	8.48948	13.057	0.894255	2.66313	5e-05	0.000738265	yes
ENSDARG00000055046	ponzr5	7:22386408-22392814	mut	Mo	OK	5.5133	10.2294	15.7427	0.891732	2.19064	0.00035	0.00382708	yes
ENSDARG00000037855	taf11	23:296269-302644	mut	Mo	OK	12.981	24.0703	37.0513	0.890852	2.40203	5e-05	0.000738265	yes
ENSDARG00000013252	si:dkey-202l16.5	3:26603290-26620948	mut	Mo	OK	0.7604	1.67973	2.44013	1.1434	1.80629	0.00165	0.0131004	yes
ENSDARG00000013295	slc2a3a	19:9766282-9793605	mut	Mo	OK	2.38127	0.867017	3.24829	-1.4576	-3.85068	5e-05	0.000738265	yes
ENSDARG00000013310	map3k15	24:25768120-25843795	mut	Mo	OK	6.44938	2.7988	9.24818	-1.20435	-4.1606	5e-05	0.000738265	yes
ENSDARG00000013317	pygmb	7:22552670-22581032	mut	Mo	OK	2.92204	0.702336	3.62438	-2.05674	-2.33029	5e-05	0.000738265	yes
ENSDARG00000013335	anxa6	14:50263573-50372929	mut	Mo	OK	3.12346	1.18931	4.31277	-1.39302	-1.86165	0.0006	0.00587614	yes
ENSDARG00000013343	kif26ba	17:11353064-11564262	mut	Mo	OK	0.667363	1.05405	1.72141	0.659404	1.92088	0.0011	0.00949324	yes
ENSDARG00000007024	uox	11:8143032-8158172	mut	Mo	OK	15.6044	28.9269	44.5313	0.890465	2.40691	0.00015	0.00190953	yes
ENSDARG00000013409	bmp2a	17:4068852-4073131	mut	Mo	OK	1.06246	0.436932	1.49939	-1.28193	-1.75903	0.0076	0.0428045	yes
ENSDARG00000013422	slc8a1a	11:30285417-30364630	mut	Mo	OK	1.46316	0.781065	2.24423	-0.905576	-2.07107	0.00055	0.00550127	yes
ENSDARG00000003961	parp3	6:42040821-42051814	mut	Mo	OK	3.73474	6.90349	10.6382	0.886318	2.83767	5e-05	0.000738265	yes
ENSDARG00000099093	dock1	12:43521977-43658321	mut	Mo	OK	17.675	32.6182	50.2932	0.883971	3.15484	5e-05	0.000738265	yes
ENSDARG00000101289	slc29a1a	13:46542392-46592299	mut	Mo	OK	45.2643	83.3847	128.649	0.881408	3.43443	5e-05	0.000738265	yes
ENSDARG00000013598	tnfb	15:34841615-34844692	mut	Mo	OK	0.487126	1.14905	1.63618	1.23808	1.44948	0.00845	0.0462566	yes
ENSDARG00000092596	si:dkeyp-44d3.1	4:40929395-40936232	mut	Mo	OK	3.64302	6.71025	10.3533	0.881233	1.84705	0.00165	0.0131004	yes
ENSDARG00000091754	CHCHD5	3:52640492-52644341	mut	Mo	OK	5.72131	10.5309	16.2522	0.880213	2.24154	0.0001	0.00134605	yes
ENSDARG00000013730	slc4a4a	5:45147259-45276787	mut	Mo	OK	2.0069	0.87631	2.88321	-1.19545	-1.91708	5e-05	0.000738265	yes
ENSDARG00000041140	ddb2	18:20479090-20490268	mut	Mo	OK	14.0057	25.7788	39.7845	0.880171	3.1984	5e-05	0.000738265	yes
ENSDARG00000013750	eno1b	6:40664166-40671870	mut	Mo	OK	2.03826	3.80509	5.84335	0.900592	1.6049	0.00445	0.0284708	yes
ENSDARG00000013777	ppp1r13l	18:35861924-35917813	mut	Mo	OK	5.65347	4.14588	9.79935	-0.447459	-1.51637	0.0084	0.04607	yes
ENSDARG00000013880	spata20	12:27498246-27574231	mut	Mo	OK	0.718184	1.85688	2.57506	1.37045	3.13337	5e-05	0.000738265	yes
ENSDARG00000058893	nhej1	6:6928719-6951894	mut	Mo	OK	9.80177	18.0351	27.8369	0.879693	2.45583	5e-05	0.000738265	yes
ENSDARG00000013928	plekhb2	22:16406133-16416929	mut	Mo	OK	1.66304	4.38586	6.0489	1.39904	3.98505	5e-05	0.000738265	yes
ENSDARG00000103689	znf1148	4:41610766-41629634	mut	Mo	OK	7.46275	13.7255	21.1883	0.879079	2.10467	0.0007	0.00664197	yes
ENSDARG00000078118	fam60al	7:64735845-64745304	mut	Mo	OK	19.3594	35.451	54.8104	0.872791	3.29378	5e-05	0.000738265	yes
ENSDARG00000014018	lhx1a	15:27770532-27777699	mut	Mo	OK	1.73069	0.707808	2.4385	-1.28992	-1.59715	0.0021	0.0159651	yes
ENSDARG00000014031	abcc2	13:551336-581285	mut	Mo	OK	4.90998	2.0649	6.97488	-1.24965	-4.07532	5e-05	0.000738265	yes
ENSDARG00000014039	si:dkeyp-93d12.1	20:42640657-42664630	mut	Mo	OK	3.54247	1.54111	5.08358	-1.20078	-1.12211	0.0013	0.0108473	yes
ENSDARG00000014053	olfm1b	21:6829153-6891310	mut	Mo	OK	1.11345	0.329894	1.44334	-1.75496	-1.19947	0.0075	0.0423512	yes
ENSDARG00000014091	osr1	13:32013919-32019993	mut	Mo	OK	0.982109	2.12509	3.1072	1.11357	2.26531	0.00035	0.00382708	yes
ENSDARG00000002791	atp1a1a.1	1:1541971-1702310	mut	Mo	OK	62.7419	114.728	177.47	0.870714	1.44358	0.00275	0.0196911	yes
ENSDARG00000026595	pafah1b1b	21:39378915-39409134	mut	Mo	OK	11.4702	20.9673	32.4375	0.87025	3.29665	5e-05	0.000738265	yes
ENSDARG00000014208	zgc:55413	15:35236523-35254971	mut	Mo	OK	2.74759	7.23563	9.98322	1.39695	2.43597	0.00015	0.00190953	yes
ENSDARG00000014209	ODF3L2 (1 of many)	2:42077288-42084601	mut	Mo	OK	0.420483	1.50371	1.92419	1.83841	2.36693	0.0013	0.0108473	yes
ENSDARG00000014273	camk2d2	1:13475959-13547582	mut	Mo	OK	0.799805	0.394349	1.19415	-1.02017	-1.58617	0.0058	0.034764	yes
ENSDARG00000014302	brinp2	2:34397564-34572688	mut	Mo	OK	1.2929	0.642116	1.93502	-1.0097	-2.21118	0.00035	0.00382708	yes
ENSDARG00000071272	ncoa6	23:2761485-2783712	mut	Mo	OK	9.46224	17.2953	26.7575	0.870126	1.65288	0.0046	0.0291725	yes
ENSDARG00000071005	ppp1r3ca	17:23291352-23294154	mut	Mo	OK	8.37178	15.2958	23.6676	0.869524	3.07776	5e-05	0.000738265	yes
ENSDARG00000082753	AC024175.17	MT:1019-1971	mut	Mo	OK	25.973	47.4534	73.4264	0.869497	2.99787	5e-05	0.000738265	yes
ENSDARG00000101024	nufip1	6:59739184-59746399	mut	Mo	OK	9.17865	16.7307	25.9093	0.866141	2.9249	5e-05	0.000738265	yes
ENSDARG00000014490	tac1	19:26065402-26068962	mut	Mo	OK	2.45124	1.17295	3.62419	-1.06337	-1.74846	0.0057	0.0343543	yes
ENSDARG00000014496	trpv6	16:12390129-12428961	mut	Mo	OK	1.73516	0.471801	2.20696	-1.87882	-3.55224	5e-05	0.000738265	yes
ENSDARG00000068021	ece2a	2:44928235-45069855	mut	Mo	OK	3.62061	6.59769	10.2183	0.865729	2.03523	0.00065	0.00626337	yes
ENSDARG00000069379	zgc:158868	18:22120312-22127312	mut	Mo	OK	4.0069	7.30062	11.3075	0.865531	2.19695	0.00025	0.00293113	yes
ENSDARG00000014554	ppp1r3cb	12:16232501-16239475	mut	Mo	OK	4.43858	1.98843	6.42701	-1.15847	-2.04955	0.0004	0.00422996	yes
ENSDARG00000014588	adcy2b	19:28025404-28192642	mut	Mo	OK	0.854729	0.510314	1.36504	-0.744081	-1.58433	0.0083	0.045608	yes
ENSDARG00000014592	dennd1a	21:8334453-8376608	mut	Mo	OK	3.01787	4.83007	7.84794	0.678511	1.84356	0.00175	0.0137622	yes
ENSDARG00000103691	RFX7 (1 of many)	25:365152-382834	mut	Mo	OK	3.83951	6.9731	10.8126	0.860877	3.19288	5e-05	0.000738265	yes
ENSDARG00000014704	pgm2l1	15:5125031-5157646	mut	Mo	OK	2.71736	4.01644	6.7338	0.563714	1.78158	0.0024	0.0177259	yes
ENSDARG00000059398	myef2	18:5552072-5567123	mut	Mo	OK	75.0437	136.197	211.241	0.859891	2.36632	5e-05	0.000738265	yes
ENSDARG00000075215	vetz	4:25923230-25958213	mut	Mo	OK	3.58984	6.5142	10.104	0.859668	2.5253	5e-05	0.000738265	yes
ENSDARG00000014804	cacna2d1a	4:19779503-19895170	mut	Mo	OK	0.472033	1.18802	1.66005	1.3316	2.8459	5e-05	0.000738265	yes
ENSDARG00000014854	reep1	17:43495357-43513565	mut	Mo	OK	1.91122	0.816574	2.72779	-1.22684	-2.23141	0.0006	0.00587614	yes
ENSDARG00000014910	panx1b	5:37240760-37252355	mut	Mo	OK	0.914485	0.490727	1.40521	-0.898038	-1.72886	0.0048	0.0302092	yes
ENSDARG00000070858	si:busm1-105l16.2	1:45782071-45903826	mut	Mo	OK	6.58229	11.9439	18.5262	0.859617	2.06871	0.0004	0.00422996	yes
ENSDARG00000014976	lims2	9:116314-122190	mut	Mo	OK	0.522005	1.70903	2.23104	1.71104	2.25835	0.0005	0.00507126	yes
ENSDARG00000015033	slc23a1	21:30054721-30074439	mut	Mo	OK	2.26542	0.900952	3.16637	-1.33025	-2.65456	5e-05	0.000738265	yes
ENSDARG00000045695	myca	24:10273097-10275662	mut	Mo	OK	13.9455	25.2644	39.2099	0.857308	3.10455	5e-05	0.000738265	yes
ENSDARG00000062948	wasf3b	24:21395667-21433091	mut	Mo	OK	15.6436	28.2945	43.9381	0.854946	3.23756	5e-05	0.000738265	yes
ENSDARG00000041481	smg5	16:45726696-45767497	mut	Mo	OK	6.2748	11.3371	17.6119	0.85341	3.06486	5e-05	0.000738265	yes
ENSDARG00000015273	alpi.1	22:38765051-38808506	mut	Mo	OK	1.86258	0.625362	2.48794	-1.57454	-1.94069	0.0017	0.0134115	yes
ENSDARG00000015278	plxnc1	4:18293669-18328628	mut	Mo	OK	1.04373	0.542827	1.58656	-0.943187	-2.0078	0.00105	0.00918036	yes
ENSDARG00000015355	fosl1a	14:30399161-30407372	mut	Mo	OK	0.383648	0.917263	1.30091	1.25755	1.57336	0.00525	0.032361	yes
ENSDARG00000024877	ptgr1	7:24103912-24119722	mut	Mo	OK	11.8949	21.445	33.3399	0.850302	1.95214	0.00055	0.00550127	yes
ENSDARG00000070571	zgc:153953	11:24479108-24519200	mut	Mo	OK	4.09154	7.37359	11.4651	0.849722	1.56476	0.0081	0.0448068	yes
ENSDARG00000012519	hcfc1b	8:7488095-7549084	mut	Mo	OK	8.62808	15.5459	24.174	0.849424	2.34122	5e-05	0.000738265	yes
ENSDARG00000042688	bora	1:29919448-29930865	mut	Mo	OK	7.51502	13.5092	21.0242	0.846091	2.13785	0.0002	0.00244048	yes
ENSDARG00000059231	hephl1a	15:2458156-2509361	mut	Mo	OK	14.4639	25.8756	40.3395	0.839131	2.17077	0.00025	0.00293113	yes
ENSDARG00000051756	pdhx	25:36857606-36864690	mut	Mo	OK	4.15118	7.41958	11.5708	0.837815	2.47682	5e-05	0.000738265	yes
ENSDARG00000063416	ptprk	20:1420721-1540060	mut	Mo	OK	6.03207	10.7787	16.8108	0.837454	2.38292	0.0001	0.00134605	yes
ENSDARG00000101534	rab3db	3:14362869-14387776	mut	Mo	OK	3.79669	6.77613	10.5728	0.835717	2.43778	5e-05	0.000738265	yes
ENSDARG00000087950	IWS1	15:46398783-46439142	mut	Mo	OK	6.90001	12.2889	19.1889	0.832682	2.95947	5e-05	0.000738265	yes
ENSDARG00000015654	ca15a	12:4283382-4309427	mut	Mo	OK	1.72331	0.637953	2.36126	-1.43366	-2.1896	0.00055	0.00550127	yes
ENSDARG00000034734	med6	13:36009289-36015654	mut	Mo	OK	15.1317	26.928	42.0597	0.831531	2.87064	5e-05	0.000738265	yes
ENSDARG00000059474	mlxip	5:66637446-66671547	mut	Mo	OK	4.15289	7.37909	11.532	0.829328	3.04901	5e-05	0.000738265	yes
ENSDARG00000022232	ppan	3:54299328-54313359	mut	Mo	OK	25.3869	45.0905	70.4774	0.82874	3.14271	5e-05	0.000738265	yes
ENSDARG00000001910	rorab	7:29241522-29354595	mut	Mo	OK	14.2102	25.2097	39.4199	0.827059	3.2048	5e-05	0.000738265	yes
ENSDARG00000069318	efr3bb	20:42984025-43081269	mut	Mo	OK	9.19313	16.3016	25.4947	0.826387	1.7943	0.0014	0.0115375	yes
ENSDARG00000014680	znf710a	18:26061595-26110160	mut	Mo	OK	14.7661	26.1503	40.9164	0.824539	3.09965	5e-05	0.000738265	yes
ENSDARG00000057583	prrc2c	20:15127178-15181143	mut	Mo	OK	14.7068	26.0445	40.7513	0.824493	3.1266	5e-05	0.000738265	yes
ENSDARG00000005246	asb3	12:23939674-23955922	mut	Mo	OK	3.78681	6.7054	10.4922	0.82434	2.46332	5e-05	0.000738265	yes
ENSDARG00000015879	pax8	5:71633657-71643280	mut	Mo	OK	1.86829	3.24231	5.1106	0.795298	2.15166	0.0004	0.00422996	yes
ENSDARG00000099469	si:dkey-13m3.1	15:9956452-9961418	mut	Mo	OK	4.11235	7.26902	11.3814	0.821797	1.94989	0.0007	0.00664197	yes
ENSDARG00000062402	frem1b	22:17091449-17165314	mut	Mo	OK	12.1083	21.3923	33.5006	0.821101	3.23938	5e-05	0.000738265	yes
ENSDARG00000102463	cox18	14:51641202-51651268	mut	Mo	OK	3.63185	6.41239	10.0442	0.82016	1.97286	0.00095	0.00847242	yes
ENSDARG00000101578	e2f4	25:17308795-17322697	mut	Mo	OK	11.8503	20.9092	32.7595	0.81922	2.81001	5e-05	0.000738265	yes
ENSDARG00000098261	rtkn2b	21:11218424-11235248	mut	Mo	OK	3.82813	6.74539	10.5735	0.817261	2.23358	0.00045	0.00467053	yes
ENSDARG00000029179	foxd1	5:34397609-34399400	mut	Mo	OK	6.92765	12.2026	19.1303	0.816753	2.6808	5e-05	0.000738265	yes
ENSDARG00000016065	tlr3	1:17200006-17205290	mut	Mo	OK	0.0932079	0.937283	1.03049	3.32996	3.63901	0.0001	0.00134605	yes
ENSDARG00000036005	pitpnb	10:4046071-4086400	mut	Mo	OK	9.66104	17.0037	26.6647	0.815597	2.94807	5e-05	0.000738265	yes
ENSDARG00000089372	clk4a	14:6627173-6637805	mut	Mo	OK	37.4906	65.9663	103.457	0.8152	3.12732	5e-05	0.000738265	yes
ENSDARG00000054255	tctex1d2	22:35496903-35502902	mut	Mo	OK	3.84762	6.7684	10.616	0.81485	2.01489	0.00105	0.00918036	yes
ENSDARG00000077732	alyref	3:59589106-59599428	mut	Mo	OK	46.1859	81.2276	127.413	0.814518	2.92546	5e-05	0.000738265	yes
ENSDARG00000005619	nek2	20:13987150-13997930	mut	Mo	OK	7.55454	13.269	20.8235	0.812646	2.73065	5e-05	0.000738265	yes
ENSDARG00000033498	rorb	5:24766523-24806654	mut	Mo	OK	5.38505	9.45695	14.842	0.812415	2.5216	5e-05	0.000738265	yes
ENSDARG00000105672	si:cabz01015814.1	4:75262430-75289486	mut	Mo	OK	7.71316	13.5273	21.2405	0.810484	1.67936	0.0037	0.0248826	yes
ENSDARG00000071906	sec24b	14:1106159-1142311	mut	Mo	OK	3.93166	6.88224	10.8139	0.80774	2.14268	0.0001	0.00134605	yes
ENSDARG00000097595	si:dkey-105i19.5	3:30563558-30564260	mut	Mo	OK	93.2531	163.08	256.333	0.806353	1.83306	0.00225	0.0168401	yes
ENSDARG00000016311	dock9b	6:12359127-12553681	mut	Mo	OK	1.716	1.00521	2.72121	-0.771555	-1.81258	0.00145	0.0118317	yes
ENSDARG00000016364	gna15.1	22:21996957-22011329	mut	Mo	OK	5.16819	2.40655	7.57474	-1.10269	-3.3641	5e-05	0.000738265	yes
ENSDARG00000016470	anxa5b	1:21964135-21983874	mut	Mo	OK	5.15762	2.60463	7.76225	-0.98563	-2.29102	0.0001	0.00134605	yes
ENSDARG00000026701	gtf2h1	25:3071110-3091371	mut	Mo	OK	10.8384	18.944	29.7824	0.805594	2.97009	5e-05	0.000738265	yes
ENSDARG00000016212	nup214	5:71099966-71186048	mut	Mo	OK	3.73352	6.51909	10.2526	0.804133	2.42231	5e-05	0.000738265	yes
ENSDARG00000016536	npas2	5:22287885-22326924	mut	Mo	OK	0.816344	2.12569	2.94203	1.38068	3.1738	5e-05	0.000738265	yes
ENSDARG00000016545	CRAT (1 of many)	8:44932722-44982549	mut	Mo	OK	0.296156	1.78518	2.08134	2.59164	2.49066	0.00095	0.00847242	yes
ENSDARG00000014358	optc	11:22952864-22966343	mut	Mo	OK	8.13768	14.2009	22.3386	0.803288	2.63444	5e-05	0.000738265	yes
ENSDARG00000016584	rgs7a	17:19606642-19707276	mut	Mo	OK	1.17126	0.469458	1.64072	-1.31899	-2.16984	0.00035	0.00382708	yes
ENSDARG00000045159	zdhhc4	12:18449580-18456558	mut	Mo	OK	18.0606	31.4954	49.556	0.802299	2.6318	5e-05	0.000738265	yes
ENSDARG00000016607	echdc2	20:16305496-16323662	mut	Mo	OK	0.959341	2.22529	3.18463	1.21388	1.91584	0.0008	0.00734984	yes
ENSDARG00000025033	stx5a	14:8288252-8310549	mut	Mo	OK	4.48565	7.82032	12.306	0.801913	2.78224	5e-05	0.000738265	yes
ENSDARG00000016667	gabbr1b	19:27456112-27676879	mut	Mo	OK	1.93306	1.14124	3.0743	-0.760287	-2.0054	0.0007	0.00664197	yes
ENSDARG00000015780	ankrd46b	7:50635888-50642185	mut	Mo	OK	5.91514	10.3101	16.2252	0.80157	2.48039	5e-05	0.000738265	yes
ENSDARG00000016718	mmp11b	21:15540562-15578825	mut	Mo	OK	2.69684	1.24302	3.93986	-1.11741	-2.39786	5e-05	0.000738265	yes
ENSDARG00000040321	rx2	2:55709126-55737506	mut	Mo	OK	14.0499	24.4776	38.5275	0.800898	2.8462	5e-05	0.000738265	yes
ENSDARG00000094160	si:ch73-160h15.3	1:46136658-46184261	mut	Mo	OK	15.6803	27.2974	42.9777	0.799808	1.53469	0.00785	0.0438993	yes
ENSDARG00000101222	lsm10	19:3885880-3920079	mut	Mo	OK	15.4859	26.9522	42.4381	0.799444	2.26588	5e-05	0.000738265	yes
ENSDARG00000016200	trib3	11:23820672-23825339	mut	Mo	OK	14.7268	25.6221	40.3489	0.798949	2.9911	5e-05	0.000738265	yes
ENSDARG00000061256	MCRIP2	22:26959879-26990064	mut	Mo	OK	12.805	22.2651	35.0701	0.79808	1.78183	0.0035	0.0238704	yes
ENSDARG00000016789	zgc:152891	21:31160599-31189350	mut	Mo	OK	0.527143	0.968753	1.4959	0.877934	1.54841	0.00895	0.0481288	yes
ENSDARG00000016835	tcirg1a	1:44170904-44199860	mut	Mo	OK	1.05533	1.75548	2.81081	0.73417	1.81422	0.0016	0.0128266	yes
ENSDARG00000104669	slc35c1	7:72023626-72041305	mut	Mo	OK	11.8776	20.6375	32.5151	0.797027	2.30943	0.0001	0.00134605	yes
ENSDARG00000105397	si:dkey-23a13.8	7:5788819-5789342	mut	Mo	OK	80.8131	140.243	221.056	0.795264	2.9064	5e-05	0.000738265	yes
ENSDARG00000016886	dnajb9b	4:17737864-17834806	mut	Mo	OK	6.44321	3.44844	9.89165	-0.901834	-1.63696	0.0055	0.033533	yes
ENSDARG00000016939	itgb2	9:45160185-45182714	mut	Mo	OK	0.782047	0.456378	1.23843	-0.777026	-1.55512	0.0083	0.045608	yes
ENSDARG00000019364	mbip	17:38348261-38360794	mut	Mo	OK	5.77021	10.0097	15.7799	0.794698	2.1565	0.0004	0.00422996	yes
ENSDARG00000087544	BX510934.1	4:55439550-55441277	mut	Mo	OK	4.30534	7.45478	11.7601	0.792038	1.89931	0.00195	0.0150354	yes
ENSDARG00000013478	rrp15	16:4367642-4373733	mut	Mo	OK	13.6762	23.6761	37.3523	0.791766	2.58423	5e-05	0.000738265	yes
ENSDARG00000037158	rcc1	16:34231582-34240972	mut	Mo	OK	6.58497	11.3805	17.9655	0.789315	2.54099	5e-05	0.000738265	yes
ENSDARG00000017229	megf10	10:16111866-16204182	mut	Mo	OK	1.8593	0.315754	2.17505	-2.55789	-2.91239	5e-05	0.000738265	yes
ENSDARG00000035282	emc6	5:41522656-41523641	mut	Mo	OK	12.3562	21.3382	33.6944	0.788203	2.42664	5e-05	0.000738265	yes
ENSDARG00000015790	atp1b3a	2:16879115-16897100	mut	Mo	OK	28.4253	49.0838	77.5091	0.788073	2.90974	5e-05	0.000738265	yes
ENSDARG00000007960	hnrnpaba	14:6655543-6661862	mut	Mo	OK	73.4129	126.677	200.09	0.787046	2.35689	0.0001	0.00134605	yes
ENSDARG00000017294	gnai2b	6:53051836-53146007	mut	Mo	OK	0.801146	1.44231	2.24346	0.848246	1.74092	0.00405	0.0264974	yes
ENSDARG00000051775	zgc:110434	25:34559683-34560070	mut	Mo	OK	195.729	337.691	533.42	0.786848	2.92963	5e-05	0.000738265	yes
ENSDARG00000009594	nr1d2b	19:17941697-17948550	mut	Mo	OK	7.81828	13.4803	21.2986	0.785927	2.21715	0.0002	0.00244048	yes
ENSDARG00000105345	zgc:173552	7:6293814-6294284	mut	Mo	OK	384.946	663.532	1048.48	0.785509	3.06321	5e-05	0.000738265	yes
ENSDARG00000029818	srsf5a	13:36404397-36409296	mut	Mo	OK	138.433	238.152	376.585	0.782689	2.89272	5e-05	0.000738265	yes
ENSDARG00000017386	sobpb	4:805479-824452	mut	Mo	OK	0.707472	1.23778	1.94525	0.807004	1.69447	0.0039	0.0257979	yes
ENSDARG00000060661	klf8	21:37985519-38063512	mut	Mo	OK	7.05136	12.129	19.1804	0.782489	1.54159	0.0063	0.0370197	yes
ENSDARG00000104782	oaz1b	21:698906-710496	mut	Mo	OK	34.4597	59.216	93.6757	0.781079	2.90777	5e-05	0.000738265	yes
ENSDARG00000102581	si:dkeyp-44b5.5	4:50684377-50754643	mut	Mo	OK	9.18912	15.7903	24.9794	0.78104	1.97753	0.0006	0.00587614	yes
ENSDARG00000035608	pgam5	5:18421574-18432443	mut	Mo	OK	23.0171	39.5305	62.5476	0.78026	3.00116	5e-05	0.000738265	yes
ENSDARG00000058207	abi2a	9:13762352-13838958	mut	Mo	OK	5.68145	9.75454	15.436	0.779815	2.0454	0.0004	0.00422996	yes
ENSDARG00000017710	ppp1r14ab	15:20268895-20297373	mut	Mo	OK	5.79984	3.18986	8.9897	-0.862521	-2.36388	5e-05	0.000738265	yes
ENSDARG00000017722	CHRM4	25:7758754-7763182	mut	Mo	OK	0.974299	0.485676	1.45998	-1.00437	-1.7017	0.00595	0.035455	yes
ENSDARG00000017739	ak5l	5:63496284-63521902	mut	Mo	OK	6.46058	3.44209	9.90267	-0.908379	-2.59355	5e-05	0.000738265	yes
ENSDARG00000021141	plekhf2	16:40475840-40509072	mut	Mo	OK	6.05822	10.3906	16.4488	0.778311	2.23535	0.0001	0.00134605	yes
ENSDARG00000040527	siae	18:36601806-36617685	mut	Mo	OK	6.79879	11.6592	18.458	0.778122	2.6912	5e-05	0.000738265	yes
ENSDARG00000071439	si:dkey-121a9.3	22:23249841-23253113	mut	Mo	OK	4.23452	7.26134	11.4959	0.778036	1.73732	0.0037	0.0248826	yes
ENSDARG00000017821	gata5	23:7445755-7457056	mut	Mo	OK	2.23058	0.931789	3.16237	-1.25934	-2.83432	5e-05	0.000738265	yes
ENSDARG00000059459	si:ch211-283h6.4	5:68046366-68055510	mut	Mo	OK	6.34493	10.8724	17.2173	0.776991	1.64269	0.00505	0.0314746	yes
ENSDARG00000017927	cx36.7	7:12582086-12583264	mut	Mo	OK	1.19098	0.487423	1.6784	-1.2889	-1.7294	0.0067	0.0388833	yes
ENSDARG00000017947	ptk6a	8:23205860-23218917	mut	Mo	OK	3.11813	1.83146	4.94959	-0.767685	-1.94282	0.0011	0.00949324	yes
ENSDARG00000027199	smad1	1:35165016-35196915	mut	Mo	OK	11.0033	18.8401	29.8434	0.775869	2.88412	5e-05	0.000738265	yes
ENSDARG00000017984	zgc:172106	1:54615772-54635013	mut	Mo	OK	2.28012	0.560091	2.84021	-2.02537	-1.92125	5e-05	0.000738265	yes
ENSDARG00000043555	tmem30ab	20:16740264-16761268	mut	Mo	OK	4.61227	7.89377	12.506	0.775236	2.39225	5e-05	0.000738265	yes
ENSDARG00000018004	nkx2.5	14:23943995-23946789	mut	Mo	OK	1.70166	0.257767	1.95943	-2.7228	-3.46328	5e-05	0.000738265	yes
ENSDARG00000018040	msantd4	15:44442395-44453240	mut	Mo	OK	1.296	2.46492	3.76092	0.927476	1.95591	0.0017	0.0134115	yes
ENSDARG00000018065	ntm	10:30077177-30703636	mut	Mo	OK	0.130223	0.818755	0.948978	2.65245	1.04419	0.00575	0.0345597	yes
ENSDARG00000018096	scap	16:41110128-41153750	mut	Mo	OK	3.51435	5.4469	8.96125	0.632177	2.1347	0.0002	0.00244048	yes
ENSDARG00000069302	snx9b	20:43119307-43182422	mut	Mo	OK	5.17816	8.85454	14.0327	0.773978	1.82121	0.00205	0.0156467	yes
ENSDARG00000018181	dnajc28	9:36063512-36065866	mut	Mo	OK	1.68641	3.33508	5.02149	0.983764	2.17067	0.0007	0.00664197	yes
ENSDARG00000018418	pth1rb	12:9219613-9256976	mut	Mo	OK	0.796325	0.395852	1.19218	-1.0084	-1.61998	0.0082	0.0452159	yes
ENSDARG00000013351	cirbpb	22:18517031-18521296	mut	Mo	OK	430.542	735.278	1165.82	0.772136	2.42501	5e-05	0.000738265	yes
ENSDARG00000101481	rbp5	16:31755125-31763217	mut	Mo	OK	9.45368	16.1236	25.5773	0.770227	2.41782	5e-05	0.000738265	yes
ENSDARG00000007791	ppp2r1a	5:57103004-57127879	mut	Mo	OK	54.9588	93.7254	148.684	0.770089	2.96707	5e-05	0.000738265	yes
ENSDARG00000078600	ldlrad3	25:36754494-36767489	mut	Mo	OK	4.97499	8.47254	13.4475	0.768102	1.738	0.0035	0.0238704	yes
ENSDARG00000018619	cers4b	2:56232607-56265726	mut	Mo	OK	2.26021	0.884606	3.14482	-1.35335	-1.59528	0.0033	0.0227386	yes
ENSDARG00000007377	odc1	17:51654872-51668516	mut	Mo	OK	33.3502	56.7751	90.1253	0.767564	2.79336	5e-05	0.000738265	yes
ENSDARG00000101118	CABZ01066813.1	20:53350930-53372331	mut	Mo	OK	10.7937	18.3687	29.1624	0.767065	2.76558	5e-05	0.000738265	yes
ENSDARG00000020465	ewsr1b	5:24369395-24378762	mut	Mo	OK	237.298	403.743	641.041	0.766737	2.50889	0.0001	0.00134605	yes
ENSDARG00000040534	epcam	13:8508748-8511340	mut	Mo	OK	147.379	250.235	397.614	0.763759	2.93394	5e-05	0.000738265	yes
ENSDARG00000018726	slco3a1	18:25087451-25190698	mut	Mo	OK	0.395657	0.815951	1.21161	1.04423	1.75322	0.00345	0.0235757	yes
ENSDARG00000044691	ppp1r3b	21:19879819-19883298	mut	Mo	OK	53.5726	90.8081	144.381	0.761325	2.56954	5e-05	0.000738265	yes
ENSDARG00000074667	akt1s1	3:30059576-30069715	mut	Mo	OK	39.535	66.8757	106.411	0.758353	2.96336	5e-05	0.000738265	yes
ENSDARG00000101936	tmem106ba	15:34108759-34120735	mut	Mo	OK	7.50975	12.688	20.1977	0.756624	2.57085	5e-05	0.000738265	yes
ENSDARG00000018921	fam84a	20:32853883-32856070	mut	Mo	OK	3.01671	5.00813	8.02484	0.731297	2.10854	0.0006	0.00587614	yes
ENSDARG00000091879	si:dkey-29d8.3	2:21527840-21642053	mut	Mo	OK	4.12676	6.96797	11.0947	0.755728	1.8103	0.00305	0.0213894	yes
ENSDARG00000071684	rx1	22:4614880-4622426	mut	Mo	OK	18.6413	31.4583	50.0996	0.754939	2.37271	5e-05	0.000738265	yes
ENSDARG00000063672	TULP3	4:1619905-1640099	mut	Mo	OK	5.17919	8.74017	13.9194	0.754936	2.68057	5e-05	0.000738265	yes
ENSDARG00000104068	gstp1	14:3400019-3406749	mut	Mo	OK	48.8199	82.3186	131.138	0.753748	2.84499	5e-05	0.000738265	yes
ENSDARG00000019142	fam185a	25:18613852-18623346	mut	Mo	OK	1.91904	4.32843	6.24747	1.17346	3.15767	5e-05	0.000738265	yes
ENSDARG00000102874	immt	14:15788325-15818017	mut	Mo	OK	5.80675	9.79083	15.5976	0.7537	2.61025	5e-05	0.000738265	yes
ENSDARG00000019265	ZBTB39	23:36538492-36547531	mut	Mo	OK	2.19063	3.74672	5.93735	0.774282	2.55517	5e-05	0.000738265	yes
ENSDARG00000019274	rasd1	12:1370085-1371691	mut	Mo	OK	2.45148	1.35933	3.81081	-0.850764	-1.71166	0.0045	0.0287272	yes
ENSDARG00000070769	foxg1a	17:29100063-29102399	mut	Mo	OK	7.9184	13.3443	21.2627	0.752943	2.65035	5e-05	0.000738265	yes
ENSDARG00000014929	p2ry11	3:54318122-54323383	mut	Mo	OK	5.01394	8.44188	13.4558	0.751621	2.11519	0.0004	0.00422996	yes
ENSDARG00000053878	inpp5l	8:38388393-38444878	mut	Mo	OK	4.17035	7.01742	11.1878	0.750772	2.62868	0.0001	0.00134605	yes
ENSDARG00000009387	robo4	10:31358278-31408437	mut	Mo	OK	13.3182	22.3824	35.7006	0.748969	2.87721	5e-05	0.000738265	yes
ENSDARG00000021996	ppp2r2aa	8:5174536-5208902	mut	Mo	OK	29.1733	48.9429	78.1162	0.74645	2.86583	5e-05	0.000738265	yes
ENSDARG00000016154	zfp36l1a	17:37845031-37848280	mut	Mo	OK	21.3401	35.773	57.1131	0.745307	2.78039	5e-05	0.000738265	yes
ENSDARG00000030020	agfg1a	15:35281487-35354552	mut	Mo	OK	6.16231	10.3244	16.4867	0.744515	1.82461	0.0012	0.0101792	yes
ENSDARG00000019564	asap2b	20:29731773-29772579	mut	Mo	OK	4.7259	3.37549	8.10139	-0.485495	-1.67437	0.0041	0.026744	yes
ENSDARG00000019579	ldb2a	14:47691629-47845744	mut	Mo	OK	2.66044	3.76278	6.42322	0.500134	1.77734	0.00175	0.0137622	yes
ENSDARG00000019646	twist3	23:2668-9354	mut	Mo	OK	1.17026	0.433182	1.60344	-1.43379	-2.23018	0.0012	0.0101792	yes
ENSDARG00000019702	aldocb	21:39585911-39616539	mut	Mo	OK	3.29797	5.8443	9.14227	0.825452	2.49624	5e-05	0.000738265	yes
ENSDARG00000059553	sympk	5:61199461-61227832	mut	Mo	OK	18.7798	31.4616	50.2414	0.744408	2.91692	5e-05	0.000738265	yes
ENSDARG00000104100	bmpr1ba	5:6996908-7206866	mut	Mo	OK	22.2737	37.3058	59.5795	0.744055	2.86993	5e-05	0.000738265	yes
ENSDARG00000019747	hsd3b2	20:1251699-1255349	mut	Mo	OK	0.583535	1.35284	1.93637	1.2131	1.6322	0.00295	0.0208906	yes
ENSDARG00000068265	tomm5	14:44312776-44329505	mut	Mo	OK	101.945	170.635	272.58	0.743129	2.77874	5e-05	0.000738265	yes
ENSDARG00000097489	si:ch73-390p7.2	23:17952625-17954985	mut	Mo	OK	8.83471	14.7829	23.6176	0.74267	2.13388	0.0002	0.00244048	yes
ENSDARG00000003144	pxmp2	5:19611973-19619202	mut	Mo	OK	3.91564	6.54974	10.4654	0.742192	1.74922	0.00385	0.0255548	yes
ENSDARG00000079716	sin3aa	25:6222475-6263869	mut	Mo	OK	7.81576	13.0612	20.877	0.740832	1.64391	0.00335	0.0230283	yes
ENSDARG00000016138	nme6	20:19662799-19675982	mut	Mo	OK	5.71139	9.541	15.2524	0.740299	2.11691	0.00025	0.00293113	yes
ENSDARG00000102221	HACD4	7:18741560-18751237	mut	Mo	OK	13.35	22.2807	35.6307	0.738959	2.39817	5e-05	0.000738265	yes
ENSDARG00000101547	CR354395.1	12:13515426-13518233	mut	Mo	OK	9.10608	15.1829	24.289	0.737544	2.64826	5e-05	0.000738265	yes
ENSDARG00000019877	rbks	17:41044519-41126491	mut	Mo	OK	4.41601	2.202	6.61801	-1.00393	-2.33288	0.00015	0.00190953	yes
ENSDARG00000056381	cfap97	1:16988106-17000336	mut	Mo	OK	4.62665	7.70932	12.336	0.736636	2.34916	5e-05	0.000738265	yes
ENSDARG00000099449	atrxl	5:22541101-22604001	mut	Mo	OK	6.4733	10.7855	17.2588	0.736524	2.76672	5e-05	0.000738265	yes
ENSDARG00000096422	si:ch211-207c15.7	19:43273671-43274735	mut	Mo	OK	4.79871	7.99084	12.7896	0.735699	1.78647	0.00205	0.0156467	yes
ENSDARG00000076144	si:ch211-74m13.3	3:54489466-54519018	mut	Mo	OK	6.29942	10.4896	16.789	0.735676	2.0791	0.0005	0.00507126	yes
ENSDARG00000104367	zgc:194469	6:12870807-12900471	mut	Mo	OK	10.2733	17.0989	27.3722	0.735002	2.37897	5e-05	0.000738265	yes
ENSDARG00000039225	vps13a	8:52005807-52105234	mut	Mo	OK	4.31267	7.17536	11.488	0.734472	2.79102	5e-05	0.000738265	yes
ENSDARG00000099118	TRAPPC9	19:4208198-4411454	mut	Mo	OK	4.21115	7.00641	11.2176	0.734461	2.42333	0.0001	0.00134605	yes
ENSDARG00000020149	acoxl	13:47137466-47266622	mut	Mo	OK	4.55741	1.59509	6.1525	-1.51458	-3.84265	5e-05	0.000738265	yes
ENSDARG00000020191	ppef1	11:30006783-30033774	mut	Mo	OK	0.756872	0.389779	1.14665	-0.957393	-1.73942	0.00375	0.0250925	yes
ENSDARG00000088713	si:ch211-226h8.14	22:25307695-25308923	mut	Mo	OK	4.86105	8.06136	12.9224	0.729754	1.55105	0.0079	0.0440371	yes
ENSDARG00000103063	si:dkey-156c23.1	4:69786732-69942332	mut	Mo	OK	8.09771	13.4194	21.5171	0.728731	2.47281	0.0001	0.00134605	yes
ENSDARG00000089190	TANC1 (1 of many)	9:52471707-52751628	mut	Mo	OK	4.10453	6.77938	10.8839	0.723934	2.62248	5e-05	0.000738265	yes
ENSDARG00000054879	six3b	12:25509324-25511981	mut	Mo	OK	26.1483	43.1591	69.3074	0.722948	2.71694	5e-05	0.000738265	yes
ENSDARG00000011020	hnrnpa1a	11:2029520-2227366	mut	Mo	OK	64.6219	106.578	171.2	0.721811	2.58103	5e-05	0.000738265	yes
ENSDARG00000011648	snrpd1	19:1922938-1927891	mut	Mo	OK	356.621	587.967	944.588	0.721345	2.82577	5e-05	0.000738265	yes
ENSDARG00000020265	angptl6	3:54269624-54296045	mut	Mo	OK	1.38619	0.209163	1.59535	-2.72843	-3.03438	5e-05	0.000738265	yes
ENSDARG00000042791	git2b	10:40362816-40396293	mut	Mo	OK	5.03926	8.30535	13.3446	0.720828	2.68099	5e-05	0.000738265	yes
ENSDARG00000020326	tyk2	3:48527578-48599773	mut	Mo	OK	1.14128	0.34249	1.48377	-1.73652	-3.76312	5e-05	0.000738265	yes
ENSDARG00000102181	Metazoa_SRP	11:11477184-11477481	mut	Mo	OK	520.811	858.087	1378.9	0.720364	2.75902	5e-05	0.000738265	yes
ENSDARG00000017525	ccnt1	23:35551967-35565702	mut	Mo	OK	7.55387	12.4443	19.9982	0.720195	2.0681	0.0003	0.00340471	yes
ENSDARG00000104222	inppl1a	15:46988350-47014875	mut	Mo	OK	18.6499	30.7126	49.3625	0.719666	2.6983	5e-05	0.000738265	yes
ENSDARG00000079639	PRRC2B	5:71232140-71274138	mut	Mo	OK	4.89606	8.06019	12.9563	0.719191	2.65636	5e-05	0.000738265	yes
ENSDARG00000100485	CT573234.2	4:65824207-65834279	mut	Mo	OK	4.01717	6.60796	10.6251	0.718026	1.85968	0.0015	0.0121938	yes
ENSDARG00000020494	znf330	1:52294446-52642922	mut	Mo	OK	17.5647	28.8858	46.4505	0.717683	2.08904	0.0004	0.00422996	yes
ENSDARG00000020544	rem1	11:24076314-24093702	mut	Mo	OK	1.58156	0.729177	2.31074	-1.117	-1.60934	0.00525	0.032361	yes
ENSDARG00000095594	si:dkey-184a18.5	10:16103535-16109075	mut	Mo	OK	3.80445	6.24017	10.0446	0.713898	1.65066	0.00595	0.035455	yes
ENSDARG00000041830	tsn	9:23118805-23128641	mut	Mo	OK	31.7118	51.9596	83.6714	0.712369	2.77721	5e-05	0.000738265	yes
ENSDARG00000020610	tnnt2a	23:5719251-5751200	mut	Mo	OK	7.86152	1.27334	9.13486	-2.62619	-4.73955	5e-05	0.000738265	yes
ENSDARG00000020841	rbm7	18:47287794-47347860	mut	Mo	OK	13.3727	21.9102	35.2829	0.712308	2.48855	5e-05	0.000738265	yes
ENSDARG00000020693	sesn1	20:32249475-32367987	mut	Mo	OK	15.5467	25.4541	41.0008	0.711285	1.79891	0.00165	0.0131004	yes
ENSDARG00000092493	si:dkeyp-44a8.2	14:6308836-6319647	mut	Mo	OK	7.54382	12.3512	19.895	0.711279	2.59913	5e-05	0.000738265	yes
ENSDARG00000073756	slc12a7a	2:24372092-24413680	mut	Mo	OK	16.8759	27.5918	44.4677	0.709274	1.62777	0.0038	0.0253294	yes
ENSDARG00000077028	si:ch211-81n22.1	6:55831562-55847944	mut	Mo	OK	4.90176	8.00542	12.9072	0.707676	1.92489	0.0012	0.0101792	yes
ENSDARG00000097789	pon3.2	16:24741925-24753588	mut	Mo	OK	11.2863	18.4296	29.7159	0.70745	1.99205	0.00025	0.00293113	yes
ENSDARG00000020718	SLC25A22 (1 of many)	25:4333511-4355991	mut	Mo	OK	1.37064	0.625328	1.99597	-1.13217	-1.72813	0.004	0.0262892	yes
ENSDARG00000020735	efcab6	25:18880696-18910276	mut	Mo	OK	0.984362	0.588064	1.57243	-0.743216	-1.78312	0.0023	0.0171404	yes
ENSDARG00000020741	fga	1:9379389-9387428	mut	Mo	OK	3.89735	0.379906	4.27726	-3.35878	-2.15761	5e-05	0.000738265	yes
ENSDARG00000020749	caprin2	4:16626049-16639826	mut	Mo	OK	0.563109	1.31028	1.87339	1.21839	2.36165	0.0001	0.00134605	yes
ENSDARG00000098451	tmem56a	24:31161322-31203145	mut	Mo	OK	7.44035	12.1263	19.5666	0.7047	1.94138	0.001	0.00882317	yes
ENSDARG00000020795	rac3b	12:2988148-3007296	mut	Mo	OK	3.88557	2.29192	6.17749	-0.761567	-2.4611	5e-05	0.000738265	yes
ENSDARG00000053912	fbl	16:42206031-42402839	mut	Mo	OK	84.988	138.321	223.309	0.702684	2.34064	5e-05	0.000738265	yes
ENSDARG00000020872	nfat5a	25:36523586-36550446	mut	Mo	OK	1.92758	3.02081	4.94839	0.648144	2.08802	0.00025	0.00293113	yes
ENSDARG00000020884	gli2b	11:43577107-43631693	mut	Mo	OK	3.65071	5.76069	9.4114	0.658064	2.36519	5e-05	0.000738265	yes
ENSDARG00000020924	myo1ca	5:37184998-37216987	mut	Mo	OK	1.47666	0.807106	2.28377	-0.871506	-2.15946	0.0004	0.00422996	yes
ENSDARG00000069169	cerk	4:27909377-27964688	mut	Mo	OK	4.46846	7.26767	11.7361	0.701715	2.22519	0.00015	0.00190953	yes
ENSDARG00000020080	ek1	24:27469314-27636079	mut	Mo	OK	26.4054	42.8885	69.2939	0.699761	2.1482	5e-05	0.000738265	yes
ENSDARG00000036493	si:ch73-174h16.4	7:39822644-39831026	mut	Mo	OK	4.22393	6.84717	11.0711	0.696922	2.38471	5e-05	0.000738265	yes
ENSDARG00000021004	c5	5:62764793-62816203	mut	Mo	OK	2.64888	1.00189	3.65077	-1.40266	-4.08357	5e-05	0.000738265	yes
ENSDARG00000021046	rhbdd1	15:36075124-36086933	mut	Mo	OK	2.39767	1.17931	3.57698	-1.02369	-2.18396	0.00055	0.00550127	yes
ENSDARG00000099084	pcif1	6:55318065-55344191	mut	Mo	OK	8.15958	13.2269	21.3865	0.696906	2.42158	5e-05	0.000738265	yes
ENSDARG00000090116	znf1136	4:40411456-40418191	mut	Mo	OK	11.5801	18.7565	30.3366	0.695748	2.48833	0.0001	0.00134605	yes
ENSDARG00000101710	arid1aa	16:33999415-34032766	mut	Mo	OK	8.59225	13.9118	22.504	0.695204	2.67373	5e-05	0.000738265	yes
ENSDARG00000021154	PRODH2	12:3889402-3904003	mut	Mo	OK	0.957984	0.425375	1.38336	-1.17127	-2.17616	0.0005	0.00507126	yes
ENSDARG00000103841	CU024870.1	25:23392430-23397900	mut	Mo	OK	4.90941	7.94796	12.8574	0.695035	2.56442	5e-05	0.000738265	yes
ENSDARG00000018658	aar2	23:4276189-4286705	mut	Mo	OK	4.89813	7.92703	12.8252	0.69455	1.85533	0.0013	0.0108473	yes
ENSDARG00000020241	icmt	23:21565599-21572423	mut	Mo	OK	7.78886	12.6036	20.3925	0.694354	2.42893	5e-05	0.000738265	yes
ENSDARG00000054570	smg1	3:30987183-31027595	mut	Mo	OK	11.9945	19.4067	31.4012	0.694175	2.7066	5e-05	0.000738265	yes
ENSDARG00000021250	slc25a48	14:25293357-25301757	mut	Mo	OK	1.63121	4.46025	6.09146	1.45118	2.81275	5e-05	0.000738265	yes
ENSDARG00000030665	TCERG1 (1 of many)	21:41768898-41805011	mut	Mo	OK	4.50259	7.26699	11.7696	0.690604	2.34439	5e-05	0.000738265	yes
ENSDARG00000105431	si:dkey-23a13.9	7:5790022-5790727	mut	Mo	OK	84.9028	136.858	221.761	0.688799	2.58715	5e-05	0.000738265	yes
ENSDARG00000021352	gria1a	14:33785540-33936260	mut	Mo	OK	1.60234	2.31868	3.92102	0.533126	1.77199	0.00225	0.0168401	yes
ENSDARG00000091851	tsen2	11:561518-570007	mut	Mo	OK	10.0269	16.1618	26.1887	0.68871	1.99723	0.0005	0.00507126	yes
ENSDARG00000042751	riok3	24:36351544-36365145	mut	Mo	OK	14.3021	23.0464	37.3485	0.688312	2.51262	5e-05	0.000738265	yes
ENSDARG00000021590	magi2a	4:23037942-23362010	mut	Mo	OK	0.71115	1.32294	2.03409	0.895523	2.1432	0.0005	0.00507126	yes
ENSDARG00000021595	lhfpl3	4:22644085-22698768	mut	Mo	OK	0.791011	0.39728	1.18829	-0.993542	-1.70835	0.00505	0.0314746	yes
ENSDARG00000021611	si:dkey-151g10.3	23:25284411-25296132	mut	Mo	OK	3.03553	6.38561	9.42114	1.07287	2.84159	5e-05	0.000738265	yes
ENSDARG00000021833	ahr2	22:13021492-13140409	mut	Mo	OK	3.43722	2.41174	5.84896	-0.511169	-1.76506	0.0026	0.0188503	yes
ENSDARG00000021849	si:dkey-256h2.1	16:47428509-47446580	mut	Mo	OK	3.45951	5.89585	9.35536	0.769134	2.27666	0.0001	0.00134605	yes
ENSDARG00000015575	cyp3c1	3:40827383-40834724	mut	Mo	OK	4.87178	7.84538	12.7172	0.687393	1.8383	0.00155	0.0125124	yes
ENSDARG00000021869	rcan2	20:39150594-39285597	mut	Mo	OK	0.85361	0.260384	1.11399	-1.71294	-1.42162	0.00695	0.0399867	yes
ENSDARG00000038881	acaa2	8:2451081-2471335	mut	Mo	OK	11.6772	18.7993	30.4765	0.686982	2.46028	5e-05	0.000738265	yes
ENSDARG00000027734	srsf5b	20:28967089-28981950	mut	Mo	OK	74.8066	120.363	195.17	0.686155	2.081	0.00025	0.00293113	yes
ENSDARG00000103339	si:ch211-193l2.5	11:41423595-41424874	mut	Mo	OK	150.243	241.648	391.891	0.685604	2.6751	5e-05	0.000738265	yes
ENSDARG00000087897	h2afy2	13:7420830-7435398	mut	Mo	OK	86.1312	138.466	224.597	0.68492	2.51576	5e-05	0.000738265	yes
ENSDARG00000011493	dcun1d3	24:39630926-39647408	mut	Mo	OK	5.56748	8.94205	14.5095	0.68358	2.3766	5e-05	0.000738265	yes
ENSDARG00000022177	ddx59	22:22393203-22404071	mut	Mo	OK	3.73982	5.85314	9.59296	0.646242	2.07484	0.00035	0.00382708	yes
ENSDARG00000011701	ctsll	5:23802076-23805867	mut	Mo	OK	4.84207	7.77658	12.6186	0.683513	1.96485	0.0006	0.00587614	yes
ENSDARG00000075337	lars2	16:2661944-2732972	mut	Mo	OK	5.02384	8.06201	13.0859	0.682348	2.08556	0.0004	0.00422996	yes
ENSDARG00000005739	gpm6ba	1:28157820-28241594	mut	Mo	OK	11.3206	18.1415	29.4621	0.680339	2.26723	5e-05	0.000738265	yes
ENSDARG00000019815	fn1a	9:15391096-15453436	mut	Mo	OK	17.2834	27.6798	44.9632	0.679452	2.45069	5e-05	0.000738265	yes
ENSDARG00000035879	fuca1.2	19:32901451-32906746	mut	Mo	OK	14.4357	23.1056	37.5413	0.678606	2.46507	5e-05	0.000738265	yes
ENSDARG00000100697	si:ch73-52f24.4	16:51328511-51349886	mut	Mo	OK	31.7558	50.8077	82.5635	0.678029	2.46204	5e-05	0.000738265	yes
ENSDARG00000022614	ddx43	13:27202205-27223583	mut	Mo	OK	2.16512	7.74481	9.90993	1.83879	4.92057	5e-05	0.000738265	yes
ENSDARG00000022698	lad1	23:5753999-5785481	mut	Mo	OK	3.31952	1.81955	5.13907	-0.867395	-2.26641	0.0001	0.00134605	yes
ENSDARG00000011740	u2af2b	19:10380076-10405393	mut	Mo	OK	30.0873	48.1208	78.2081	0.677509	1.89508	0.00075	0.00701292	yes
ENSDARG00000070426	chac1	20:28367801-28370372	mut	Mo	OK	24.3672	38.9576	63.3248	0.676964	2.50623	5e-05	0.000738265	yes
ENSDARG00000075323	srfbp1	19:29708967-29716565	mut	Mo	OK	8.10642	12.9543	21.0607	0.676298	2.46317	5e-05	0.000738265	yes
ENSDARG00000061759	kdm6a	9:33978905-34053238	mut	Mo	OK	11.8635	18.9568	30.8203	0.676183	1.91762	0.0021	0.0159651	yes
ENSDARG00000051726	si:dkey-108k21.27	25:34607133-34607508	mut	Mo	OK	106.196	169.688	275.884	0.676152	2.35724	5e-05	0.000738265	yes
ENSDARG00000023174	fez1	10:31794629-31838756	mut	Mo	OK	3.69883	2.46214	6.16097	-0.587152	-1.61696	0.00595	0.035455	yes
ENSDARG00000023188	lcp1	9:56663225-56705090	mut	Mo	OK	4.48103	2.6032	7.08423	-0.783548	-2.2056	0.00025	0.00293113	yes
ENSDARG00000071410	cks2	22:21288340-21326491	mut	Mo	OK	22.3699	35.7357	58.1056	0.67581	2.19116	0.0003	0.00340471	yes
ENSDARG00000103108	ACVR2B (1 of many)	2:52225339-52262103	mut	Mo	OK	53.5782	85.5824	139.161	0.675669	2.65659	5e-05	0.000738265	yes
ENSDARG00000011885	mrpl19	20:25541423-25546156	mut	Mo	OK	28.5829	45.6108	74.1937	0.674225	2.53564	5e-05	0.000738265	yes
ENSDARG00000099760	CT573263.1	4:64866059-64872970	mut	Mo	OK	5.80255	9.24892	15.0515	0.672597	2.26676	5e-05	0.000738265	yes
ENSDARG00000023537	ahr1b	22:12954435-13018215	mut	Mo	OK	1.46701	2.33212	3.79913	0.668765	1.93884	0.0006	0.00587614	yes
ENSDARG00000079252	fam117ab	12:9811632-9838233	mut	Mo	OK	4.19805	6.69065	10.8887	0.672426	2.11135	0.00035	0.00382708	yes
ENSDARG00000041294	noxo1a	3:61924549-61931972	mut	Mo	OK	4.10528	6.53517	10.6404	0.670744	2.15876	0.0003	0.00340471	yes
ENSDARG00000104771	timm44	22:3994582-4010640	mut	Mo	OK	10.1662	16.18	26.3462	0.670428	2.3795	0.0001	0.00134605	yes
ENSDARG00000058730	rdh10a	24:13107060-13128424	mut	Mo	OK	7.2584	11.547	18.8054	0.6698	1.61175	0.00615	0.0363969	yes
ENSDARG00000023713	aqp1a.1	2:2895632-2907365	mut	Mo	OK	4.43367	1.20193	5.6356	-1.88314	-3.8188	5e-05	0.000738265	yes
ENSDARG00000054864	aplp2	18:44371075-44533486	mut	Mo	OK	18.2029	28.9373	47.1402	0.668764	2.62498	5e-05	0.000738265	yes
ENSDARG00000031795	abcf1	19:30841599-30860324	mut	Mo	OK	27.9562	44.4282	72.3844	0.668305	2.3672	5e-05	0.000738265	yes
ENSDARG00000090386	cd3eap	15:28854010-28869384	mut	Mo	OK	21.4435	34.0703	55.5138	0.667969	2.39536	5e-05	0.000738265	yes
ENSDARG00000069832	sfxn4	13:9498986-9509783	mut	Mo	OK	10.2788	16.3146	26.5934	0.666488	2.17068	0.0001	0.00134605	yes
ENSDARG00000024101	adra1d	1:41256045-41281418	mut	Mo	OK	1.58418	0.563721	2.1479	-1.49069	-3.90818	5e-05	0.000738265	yes
ENSDARG00000024160	hao1	17:3879455-3912544	mut	Mo	OK	3.19293	1.23764	4.43057	-1.36729	-2.75481	0.00015	0.00190953	yes
ENSDARG00000024229	ubl7a	25:31332689-31352936	mut	Mo	OK	1.64684	2.61605	4.26289	0.667691	1.58677	0.00685	0.0395292	yes
ENSDARG00000024276	pcbp4	22:32334906-32553561	mut	Mo	OK	1.91686	3.86678	5.78364	1.01239	1.63413	0.0039	0.0257979	yes
ENSDARG00000021239	apaf1	4:17854737-18212788	mut	Mo	OK	6.57214	10.4286	17.0007	0.666106	1.78184	0.00165	0.0131004	yes
ENSDARG00000058089	rprd2a	19:8975026-9007650	mut	Mo	OK	7.34538	11.655	19.0004	0.666041	2.47234	5e-05	0.000738265	yes
ENSDARG00000052713	lrrtm1	1:41523895-42334565	mut	Mo	OK	9.53885	15.1308	24.6697	0.665601	2.16712	0.0001	0.00134605	yes
ENSDARG00000024548	cryba4	10:44195429-44204668	mut	Mo	OK	3.7535	0.99767	4.75117	-1.9116	-2.64882	0.0001	0.00134605	yes
ENSDARG00000098270	znf1053	4:42005579-42013350	mut	Mo	OK	6.05291	9.59485	15.6478	0.664632	2.09295	0.00045	0.00467053	yes
ENSDARG00000093058	si:dkey-13i19.8	4:16794797-16835301	mut	Mo	OK	9.56428	15.1371	24.7014	0.662359	1.98046	0.00075	0.00701292	yes
ENSDARG00000024789	mxc	9:32994775-33007893	mut	Mo	OK	0.76832	0.238769	1.00709	-1.68609	-2.24967	0.00035	0.00382708	yes
ENSDARG00000003087	ubxn6	22:22235231-22249415	mut	Mo	OK	4.62328	7.31665	11.9399	0.662266	2.08937	0.00045	0.00467053	yes
ENSDARG00000005318	stam2	9:38233541-38255352	mut	Mo	OK	7.40629	11.7178	19.1241	0.661875	2.37644	5e-05	0.000738265	yes
ENSDARG00000002710	ncl	22:36704302-36721742	mut	Mo	OK	298.49	471.928	770.418	0.660884	2.16264	5e-05	0.000738265	yes
ENSDARG00000006666	BUD13	21:22660453-22668742	mut	Mo	OK	10.2457	16.1967	26.4424	0.660682	2.31953	0.0001	0.00134605	yes
ENSDARG00000025089	loxl4	13:40056596-40112923	mut	Mo	OK	0.644341	1.01111	1.65545	0.650039	1.71341	0.0032	0.0221904	yes
ENSDARG00000025206	syt2a	23:6298918-6379836	mut	Mo	OK	1.87904	0.961906	2.84095	-0.966032	-1.70733	0.00225	0.0168401	yes
ENSDARG00000089039	zgc:173585	25:34630717-34631309	mut	Mo	OK	115.292	182.237	297.529	0.660525	2.30051	0.0002	0.00244048	yes
ENSDARG00000025420	fzd5	9:28421775-28423698	mut	Mo	OK	6.37472	10.0723	16.447	0.659967	2.17895	0.00015	0.00190953	yes
ENSDARG00000077307	tmem201	23:29900592-29931546	mut	Mo	OK	5.69722	8.99591	14.6931	0.65901	1.60643	0.00545	0.0332749	yes
ENSDARG00000053200	dis3l	7:33970168-33985224	mut	Mo	OK	6.84262	10.7881	17.6307	0.656816	2.39921	5e-05	0.000738265	yes
ENSDARG00000007531	zcchc9	10:43070528-43075771	mut	Mo	OK	9.26099	14.5687	23.8297	0.653632	2.12709	0.0004	0.00422996	yes
ENSDARG00000025513	dip2cb	2:42646289-42729836	mut	Mo	OK	1.24186	1.81929	3.06115	0.550869	1.62657	0.005	0.0312527	yes
ENSDARG00000025671	grm6b	11:25396424-25442093	mut	Mo	OK	1.68762	0.974696	2.66232	-0.791964	-2.07915	0.00055	0.00550127	yes
ENSDARG00000025858	zgc:56525	8:49103269-49123267	mut	Mo	OK	18.1449	28.5148	46.6597	0.652145	1.81402	0.0019	0.0147087	yes
ENSDARG00000008279	map2k7	1:45148131-45164383	mut	Mo	OK	8.68781	13.638	22.3258	0.650572	2.08935	0.0001	0.00134605	yes
ENSDARG00000019765	LUC7L2	1:54491478-54505437	mut	Mo	OK	6.43398	10.0998	16.5338	0.650541	2.32041	5e-05	0.000738265	yes
ENSDARG00000069708	cdc34a	22:22115916-22139405	mut	Mo	OK	10.6103	16.6556	27.2659	0.650541	2.25432	0.0001	0.00134605	yes
ENSDARG00000025904	tecrb	1:55074941-55099503	mut	Mo	OK	1.19377	2.80943	4.0032	1.23475	1.91281	0.00035	0.00382708	yes
ENSDARG00000025983	l3mbtl3	20:2112729-2179604	mut	Mo	OK	2.1756	3.30061	5.47621	0.601316	1.55418	0.00875	0.0473761	yes
ENSDARG00000026035	ube2b	21:45325417-45334474	mut	Mo	OK	5.12318	8.03355	13.1567	0.648998	2.10001	0.0004	0.00422996	yes
ENSDARG00000026028	ankrd44	9:32295581-32347740	mut	Mo	OK	3.29101	2.33384	5.62485	-0.495823	-1.7186	0.0026	0.0188503	yes
ENSDARG00000040396	bcl7bb	18:41559571-41569226	mut	Mo	OK	5.77317	9.04167	14.8148	0.647226	1.89966	0.0012	0.0101792	yes
ENSDARG00000026052	ccdc3a	4:7993244-8005834	mut	Mo	OK	0.579582	1.23875	1.81833	1.0958	1.67759	0.0055	0.033533	yes
ENSDARG00000026086	zgc:162324	6:46256937-46318645	mut	Mo	OK	0.0865407	1.64545	1.73199	4.24896	1.70404	0.00635	0.0372757	yes
ENSDARG00000043797	cdc5l	17:4903019-4947809	mut	Mo	OK	34.0064	53.248	87.2544	0.646922	2.55641	5e-05	0.000738265	yes
ENSDARG00000090687	rcbtb2	15:3136842-3171822	mut	Mo	OK	4.7071	7.37017	12.0773	0.646858	2.13667	0.0004	0.00422996	yes
ENSDARG00000029045	peli2	17:43916926-43966968	mut	Mo	OK	10.3565	16.1983	26.5548	0.645311	2.34192	5e-05	0.000738265	yes
ENSDARG00000026387	tmem55bb	1:9633965-9640914	mut	Mo	OK	4.4408	2.60062	7.04142	-0.771962	-1.82546	0.0019	0.0147087	yes
ENSDARG00000020258	ewsr1a	10:8016884-8029717	mut	Mo	OK	92.3354	144.377	236.712	0.644889	1.92296	0.001	0.00882317	yes
ENSDARG00000026484	rab15	20:28880023-28898120	mut	Mo	OK	2.66974	4.01515	6.68489	0.588756	1.63382	0.0054	0.033051	yes
ENSDARG00000026500	xkr9	24:14057907-14068102	mut	Mo	OK	4.34988	2.29781	6.64769	-0.920715	-2.26981	0.00015	0.00190953	yes
ENSDARG00000079504	mfn2	8:47908741-47959911	mut	Mo	OK	5.71367	8.93361	14.6473	0.644824	2.40816	5e-05	0.000738265	yes
ENSDARG00000063627	bop1	19:2989233-3115337	mut	Mo	OK	7.50678	11.7371	19.2439	0.644806	2.25311	0.0001	0.00134605	yes
ENSDARG00000043511	prdx6	20:15264924-15285256	mut	Mo	OK	32.7865	51.2124	83.9989	0.643392	2.35904	5e-05	0.000738265	yes
ENSDARG00000052142	acvr1bb	6:2040702-2065438	mut	Mo	OK	10.1209	15.8032	25.9241	0.64288	2.14814	0.0001	0.00134605	yes
ENSDARG00000010408	igsf9b	8:4797694-4904043	mut	Mo	OK	5.31702	8.30018	13.6172	0.642526	2.44787	5e-05	0.000738265	yes
ENSDARG00000101813	nap1l1	4:1469443-1496899	mut	Mo	OK	73.6597	114.968	188.628	0.642286	2.46974	5e-05	0.000738265	yes
ENSDARG00000039887	c1qbp	5:3590949-3604310	mut	Mo	OK	88.3589	137.907	226.266	0.642253	2.48888	5e-05	0.000738265	yes
ENSDARG00000026907	slc48a1a	23:33430631-33434894	mut	Mo	OK	1.65345	3.34716	5.00061	1.01746	2.32351	0.00025	0.00293113	yes
ENSDARG00000012968	rhoub	15:9014505-9026086	mut	Mo	OK	49.1542	76.6406	125.795	0.640794	2.43363	5e-05	0.000738265	yes
ENSDARG00000042069	pebp1	5:14850736-14857602	mut	Mo	OK	27.1605	42.3299	69.4904	0.640168	2.30895	5e-05	0.000738265	yes
ENSDARG00000027063	arpc1b	3:40667152-40678754	mut	Mo	OK	4.27542	1.63067	5.90609	-1.3906	-3.39291	5e-05	0.000738265	yes
ENSDARG00000060554	mut	20:44474738-44562783	mut	Mo	OK	5.41526	8.43965	13.8549	0.640152	2.16172	5e-05	0.000738265	yes
ENSDARG00000015563	LPIN3	6:1615500-1638559	mut	Mo	OK	4.83322	7.53228	12.3655	0.640102	2.18718	0.0003	0.00340471	yes
ENSDARG00000022509	cox4i2	23:19018044-19024805	mut	Mo	OK	4.95758	7.72581	12.6834	0.640049	1.68234	0.00315	0.0219753	yes
ENSDARG00000026444	apoob	24:21828754-21844232	mut	Mo	OK	5.41493	8.43616	13.8511	0.639644	1.61211	0.0052	0.0321556	yes
ENSDARG00000019332	ndufb4	24:23825881-23840744	mut	Mo	OK	22.6442	35.272	57.9162	0.63938	1.8916	0.00155	0.0125124	yes
ENSDARG00000027424	slc25a3a	4:16855996-16864488	mut	Mo	OK	1.83195	0.561528	2.39348	-1.70595	-2.48862	0.0002	0.00244048	yes
ENSDARG00000028327	gmfb	13:36459566-36486327	mut	Mo	OK	127.267	198.232	325.499	0.639326	1.94775	0.0007	0.00664197	yes
ENSDARG00000027572	as3mt	1:30974099-30990307	mut	Mo	OK	1.56069	3.49864	5.05933	1.16461	2.48712	5e-05	0.000738265	yes
ENSDARG00000052833	zfand3	13:44565291-44622196	mut	Mo	OK	5.59197	8.70895	14.3009	0.639144	2.08507	0.00015	0.00190953	yes
ENSDARG00000027620	bco2l	5:25521239-25530374	mut	Mo	OK	1.16382	0.149975	1.3138	-2.95608	-3.38056	0.001	0.00882317	yes
ENSDARG00000060994	fbxw7	1:24178199-24453610	mut	Mo	OK	23.4338	36.4522	59.886	0.63742	2.23219	0.0001	0.00134605	yes
ENSDARG00000004328	LIN28A (1 of many)	16:4825046-4878382	mut	Mo	OK	10.6497	16.5625	27.2122	0.637113	1.57227	0.008	0.0444234	yes
ENSDARG00000030573	nudt1	3:41979307-41983797	mut	Mo	OK	10.6619	16.5768	27.2387	0.636707	2.10917	0.00025	0.00293113	yes
ENSDARG00000018716	dgkh	9:17778058-17952877	mut	Mo	OK	5.80377	9.02192	14.8257	0.636443	2.15026	0.0004	0.00422996	yes
ENSDARG00000017397	smarcc1a	16:42519771-42557505	mut	Mo	OK	22.9811	35.7184	58.6995	0.63622	2.46859	5e-05	0.000738265	yes
ENSDARG00000028058	traf6	7:48447147-48466002	mut	Mo	OK	2.54316	3.59285	6.13601	0.498508	1.64674	0.0045	0.0287272	yes
ENSDARG00000025718	cxxc1b	11:25302081-25313229	mut	Mo	OK	12.2927	19.091	31.3837	0.635094	2.14038	0.00015	0.00190953	yes
ENSDARG00000028071	bmp1a	8:51176367-51306736	mut	Mo	OK	2.38414	4.18083	6.56497	0.810317	2.52468	5e-05	0.000738265	yes
ENSDARG00000005122	atp2a2b	21:17014355-17071851	mut	Mo	OK	18.9147	29.3616	48.2763	0.634423	2.43011	5e-05	0.000738265	yes
ENSDARG00000016302	upf1	2:56045566-56111198	mut	Mo	OK	29.9889	46.5494	76.5383	0.634335	2.46178	5e-05	0.000738265	yes
ENSDARG00000045351	ccdc58	24:20778124-20782393	mut	Mo	OK	15.2191	23.6222	38.8413	0.634267	1.91841	0.00145	0.0118317	yes
ENSDARG00000028213	ttn.2	9:42931204-43272173	mut	Mo	OK	4.7209	0.997875	5.71877	-2.24213	-2.92473	5e-05	0.000738265	yes
ENSDARG00000018643	igf2a	7:48597719-48603704	mut	Mo	OK	8.25656	12.8126	21.0692	0.633947	2.0535	0.00065	0.00626337	yes
ENSDARG00000028322	pex14	23:28882373-28999216	mut	Mo	OK	2.58253	4.14837	6.7309	0.683761	2.33178	0.0001	0.00134605	yes
ENSDARG00000062401	znf319	25:13566205-13580282	mut	Mo	OK	9.79109	15.1905	24.9816	0.633626	2.18403	0.0002	0.00244048	yes
ENSDARG00000028541	si:ch211-121a2.4	20:7132152-7141316	mut	Mo	OK	3.80971	1.88157	5.69128	-1.01774	-1.78434	0.0016	0.0128266	yes
ENSDARG00000069356	adgrl2a	11:7518759-7727096	mut	Mo	OK	10.9779	17.0232	28.0011	0.632904	1.5145	0.00445	0.0284708	yes
ENSDARG00000028664	ahsa1a	20:27068063-27075091	mut	Mo	OK	3.69678	1.85227	5.54905	-0.996975	-1.90612	0.00115	0.00982707	yes
ENSDARG00000055966	cflara	11:30085774-30094247	mut	Mo	OK	5.57517	8.64416	14.2193	0.632711	1.80854	0.0015	0.0121938	yes
ENSDARG00000103982	si:ch211-193l2.6	11:41401885-41406010	mut	Mo	OK	29.9339	46.4053	76.3392	0.632508	2.20529	5e-05	0.000738265	yes
ENSDARG00000028784	si:dkey-24p1.6	15:38406835-38460216	mut	Mo	OK	0.378264	1.32322	1.70148	1.80659	3.00738	5e-05	0.000738265	yes
ENSDARG00000077531	bag6l	19:30887768-30923600	mut	Mo	OK	8.92606	13.8347	22.7608	0.632198	2.35407	5e-05	0.000738265	yes
ENSDARG00000016239	psmd13	25:10388296-10399973	mut	Mo	OK	48.9411	75.773	124.714	0.630637	2.09887	0.0006	0.00587614	yes
ENSDARG00000051874	stra6	25:22474140-22541638	mut	Mo	OK	13.8083	21.375	35.1833	0.630386	2.00549	0.0001	0.00134605	yes
ENSDARG00000077396	tlcd2	15:25462861-25499820	mut	Mo	OK	5.04048	7.8018	12.8423	0.630245	2.15722	5e-05	0.000738265	yes
ENSDARG00000070677	fezf2	11:19618374-19909486	mut	Mo	OK	14.5143	22.4636	36.9779	0.630119	1.93384	0.0008	0.00734984	yes
ENSDARG00000042056	mau2	2:58790297-58805176	mut	Mo	OK	19.5116	30.1903	49.7019	0.62975	1.82137	0.00125	0.0105211	yes
ENSDARG00000029051	gbe1a	10:23964325-24327137	mut	Mo	OK	1.58677	0.375777	1.96255	-2.07815	-2.72368	0.0001	0.00134605	yes
ENSDARG00000028222	itgb8	19:2443273-2475977	mut	Mo	OK	4.83621	7.4801	12.3163	0.629181	2.10783	0.0003	0.00340471	yes
ENSDARG00000038569	fzd8b	2:48100995-48103509	mut	Mo	OK	6.42097	9.92645	16.3474	0.628487	2.17313	0.00025	0.00293113	yes
ENSDARG00000020761	arrdc2	11:13466844-13476123	mut	Mo	OK	5.23163	8.08494	13.3166	0.627978	1.9527	0.00095	0.00847242	yes
ENSDARG00000007975	fth1b	25:2933070-2940214	mut	Mo	OK	4.16392	6.42809	10.592	0.626447	1.82019	0.0021	0.0159651	yes
ENSDARG00000029204	tyrp1a	7:73941373-73947349	mut	Mo	OK	2.54303	1.2125	3.75553	-1.06856	-2.52856	5e-05	0.000738265	yes
ENSDARG00000101407	tgm1l4	23:46240646-46250912	mut	Mo	OK	24.708	38.1343	62.8423	0.62611	2.41852	5e-05	0.000738265	yes
ENSDARG00000029263	hoxb3a	3:23567485-23730393	mut	Mo	OK	1.2651	0.280835	1.54593	-2.17146	-1.33745	0.00175	0.0137622	yes
ENSDARG00000086604	si:ch211-113a14.25	25:35817417-35817804	mut	Mo	OK	329.979	509.148	839.127	0.625711	2.42273	5e-05	0.000738265	yes
ENSDARG00000029372	rasa4	5:58608686-58718291	mut	Mo	OK	1.56058	0.711807	2.27239	-1.13252	-2.48699	0.0001	0.00134605	yes
ENSDARG00000029439	atp2a2a	8:11649526-11707308	mut	Mo	OK	5.41229	3.81244	9.22473	-0.505525	-1.55565	0.0079	0.0440371	yes
ENSDARG00000057648	dnttip2	8:15240168-15248604	mut	Mo	OK	36.5611	56.3938	92.9549	0.625229	2.44296	5e-05	0.000738265	yes
ENSDARG00000005010	si:dkeyp-2e4.8	13:44681542-44682350	mut	Mo	OK	8.53701	13.1549	21.6919	0.623797	1.7685	0.00225	0.0168401	yes
ENSDARG00000089243	r3hcc1l	1:54270407-54280812	mut	Mo	OK	10.2379	15.7753	26.0132	0.623743	2.16657	0.00025	0.00293113	yes
ENSDARG00000063309	tjp2a	10:15857747-15921450	mut	Mo	OK	9.03941	13.9275	22.9669	0.623631	2.36098	5e-05	0.000738265	yes
ENSDARG00000102492	Metazoa_SRP	11:15905881-16189940	mut	Mo	OK	51055.9	78504.9	129561	0.620705	1.88959	0.0008	0.00734984	yes
ENSDARG00000040031	tardbp	6:45935894-46160703	mut	Mo	OK	24.7249	38.0125	62.7374	0.620509	2.33747	5e-05	0.000738265	yes
ENSDARG00000029894	slc2a15a	13:28286846-28311636	mut	Mo	OK	1.48232	0.482874	1.96519	-1.61814	-2.6195	0.00025	0.00293113	yes
ENSDARG00000005551	hnrnph1l	21:30132914-30145069	mut	Mo	OK	53.7864	82.6759	136.462	0.620225	1.6829	0.0033	0.0227386	yes
ENSDARG00000008461	anapc5	8:40152701-40171278	mut	Mo	OK	10.25	15.7394	25.9894	0.618762	2.24539	0.0001	0.00134605	yes
ENSDARG00000029952	ampd2b	8:25206450-25272477	mut	Mo	OK	4.37213	2.68244	7.05457	-0.704789	-1.54732	0.00685	0.0395292	yes
ENSDARG00000060113	znf395a	17:16082226-16100451	mut	Mo	OK	14.8155	22.7496	37.5651	0.61874	2.07894	0.00015	0.00190953	yes
ENSDARG00000030006	SLC6A7	21:30757655-30794206	mut	Mo	OK	2.26853	1.34245	3.61098	-0.756895	-2.20905	0.00035	0.00382708	yes
ENSDARG00000102370	znf1094	4:40986636-40993450	mut	Mo	OK	4.76983	7.32027	12.0901	0.617959	2.00447	0.0007	0.00664197	yes
ENSDARG00000102963	SIRT6	2:53469009-53506514	mut	Mo	OK	17.6793	27.1322	44.8115	0.617946	2.15864	0.0003	0.00340471	yes
ENSDARG00000030104	sh3bp4	9:23558424-23572262	mut	Mo	OK	2.10855	1.0803	3.18885	-0.964823	-2.10334	0.00025	0.00293113	yes
ENSDARG00000031637	pan3	24:21575129-21603526	mut	Mo	OK	15.5122	23.7962	39.3084	0.617331	1.85252	0.0008	0.00734984	yes
ENSDARG00000076930	si:dkey-261m9.9	25:34632121-34632433	mut	Mo	OK	983.248	1508.22	2491.47	0.617217	2.42174	0.0001	0.00134605	yes
ENSDARG00000030269	grtp1b	9:34580790-34587079	mut	Mo	OK	1.10005	0.311632	1.41168	-1.81965	-2.42934	0.0007	0.00664197	yes
ENSDARG00000030289	jag1a	1:50461184-50513861	mut	Mo	OK	3.85838	2.71219	6.57057	-0.50854	-1.64374	0.0049	0.0307605	yes
ENSDARG00000103068	Metazoa_SRP	11:11478684-11478981	mut	Mo	OK	3014.41	4623.67	7638.08	0.617161	2.40347	5e-05	0.000738265	yes
ENSDARG00000030357	zgc:66313	17:43749942-43773770	mut	Mo	OK	0.927143	6.29624	7.22338	2.76363	2.69012	5e-05	0.000738265	yes
ENSDARG00000030364	angpt1	19:47220675-47366372	mut	Mo	OK	1.67876	0.873539	2.5523	-0.94245	-1.97153	0.0015	0.0121938	yes
ENSDARG00000017365	slc23a2	8:42910727-42979902	mut	Mo	OK	8.4184	12.9115	21.3299	0.617035	2.31881	5e-05	0.000738265	yes
ENSDARG00000020946	auts2b	15:20069033-20088473	mut	Mo	OK	7.63287	11.7008	19.3337	0.616305	1.69655	0.0032	0.0221904	yes
ENSDARG00000036868	tbpl1	23:31669909-31678776	mut	Mo	OK	6.60117	10.1164	16.7176	0.61591	1.92008	0.00085	0.00771532	yes
ENSDARG00000030490	sptb	17:38619131-38651437	mut	Mo	OK	0.974676	0.227681	1.20236	-2.09791	-4.65211	5e-05	0.000738265	yes
ENSDARG00000104687	slc16a9b	12:7555067-7573326	mut	Mo	OK	9.37332	14.3563	23.7296	0.615047	2.25843	0.0001	0.00134605	yes
ENSDARG00000030614	syt1a	4:21408780-21594424	mut	Mo	OK	5.23257	0.962248	6.19482	-2.44304	-5.06924	5e-05	0.000738265	yes
ENSDARG00000030633	plekhm3	9:28329438-28393622	mut	Mo	OK	2.52991	3.65216	6.18207	0.529665	1.56582	0.00725	0.0412075	yes
ENSDARG00000070080	nbeaa	10:34482438-34791137	mut	Mo	OK	4.53395	6.94245	11.4764	0.614678	1.47332	0.0085	0.046384	yes
ENSDARG00000103490	dpysl4	12:41086233-41124405	mut	Mo	OK	6.96943	10.6709	17.6403	0.614569	1.63378	0.0055	0.033533	yes
ENSDARG00000030722	xirp1	2:24093962-24113167	mut	Mo	OK	2.38966	1.06173	3.45139	-1.17039	-3.6987	5e-05	0.000738265	yes
ENSDARG00000056128	fastkd1	9:48535149-48570251	mut	Mo	OK	7.90179	12.0819	19.9837	0.612591	1.58043	0.00465	0.0294037	yes
ENSDARG00000030733	b3gat2	13:27821237-27879124	mut	Mo	OK	1.26859	0.595223	1.86381	-1.09173	-1.81483	0.0034	0.023335	yes
ENSDARG00000036090	pard6gb	19:26115105-26188757	mut	Mo	OK	14.6949	22.467	37.1619	0.612493	2.34928	0.0001	0.00134605	yes
ENSDARG00000027491	uros	12:48750692-48759117	mut	Mo	OK	6.97595	10.6561	17.632	0.611213	1.95165	0.0009	0.0081056	yes
ENSDARG00000030803	zgc:110006	10:35115995-35164823	mut	Mo	OK	2.36303	4.59626	6.95929	0.959823	2.09487	0.0007	0.00664197	yes
ENSDARG00000010144	plppr3a	2:26523461-26553791	mut	Mo	OK	6.85925	10.4529	17.3121	0.607778	2.22816	5e-05	0.000738265	yes
ENSDARG00000030932	fgf10a	21:19595614-19649043	mut	Mo	OK	2.44852	1.30668	3.7552	-0.906011	-2.00557	0.00125	0.0105211	yes
ENSDARG00000026519	ralgps2	20:16033444-16256836	mut	Mo	OK	10.8163	16.4775	27.2938	0.607288	1.96162	0.0006	0.00587614	yes
ENSDARG00000031126	notum1a	3:57878416-57908864	mut	Mo	OK	4.87609	3.00782	7.88391	-0.697008	-1.97329	0.00075	0.00701292	yes
ENSDARG00000032056	arl6	1:33471289-33501370	mut	Mo	OK	8.39678	12.7893	21.1861	0.60703	2.15838	5e-05	0.000738265	yes
ENSDARG00000031283	vamp1	19:9541506-9554010	mut	Mo	OK	3.12125	4.52821	7.64946	0.536816	1.59139	0.0062	0.0366055	yes
ENSDARG00000031325	tmed1a	3:50413837-50425171	mut	Mo	OK	5.52441	1.50012	7.02453	-1.88074	-4.23727	5e-05	0.000738265	yes
ENSDARG00000031336	hsd20b2	5:37600653-37614654	mut	Mo	OK	5.71255	2.02005	7.7326	-1.49974	-4.48934	5e-05	0.000738265	yes
ENSDARG00000031343	rab6bb	2:23139842-23148014	mut	Mo	OK	3.77668	2.35278	6.12946	-0.682749	-1.86968	0.0017	0.0134115	yes
ENSDARG00000104087	zgc:173552	7:73601725-73602239	mut	Mo	OK	358.658	546.269	904.927	0.607001	2.2502	0.0001	0.00134605	yes
ENSDARG00000042087	dmap1	8:18320389-18332024	mut	Mo	OK	11.7978	17.9667	29.7645	0.606816	2.19408	0.0003	0.00340471	yes
ENSDARG00000031683	fosab	20:46648590-46650720	mut	Mo	OK	0.789174	2.15759	2.94676	1.451	1.93534	0.001	0.00882317	yes
ENSDARG00000031698	mylk2	23:32112854-32134352	mut	Mo	OK	1.09228	0.33475	1.42703	-1.70619	-3.26249	5e-05	0.000738265	yes
ENSDARG00000077859	ndufaf4	20:411851-415177	mut	Mo	OK	5.62161	8.56104	14.1827	0.606802	1.52218	0.0092	0.0491535	yes
ENSDARG00000031751	npr1a	19:26839366-27044894	mut	Mo	OK	4.33997	3.1038	7.44377	-0.48365	-1.67203	0.00405	0.0264974	yes
ENSDARG00000063249	mrpl9	19:7599378-7606663	mut	Mo	OK	9.79119	14.9076	24.6988	0.606491	2.09283	0.0002	0.00244048	yes
ENSDARG00000052893	rx3	21:10663525-10666595	mut	Mo	OK	12.2347	18.621	30.8557	0.605946	2.06444	0.0007	0.00664197	yes
ENSDARG00000063126	gusb	5:1800936-1846705	mut	Mo	OK	6.6572	10.1282	16.7854	0.605397	2.23961	0.00015	0.00190953	yes
ENSDARG00000015472	gpc4	14:30749836-30810834	mut	Mo	OK	32.0717	48.7895	80.8612	0.605269	2.38557	5e-05	0.000738265	yes
ENSDARG00000059738	ptprsa	22:3370078-3747162	mut	Mo	OK	10.1823	15.4866	25.6689	0.604946	1.52839	0.00135	0.0111892	yes
ENSDARG00000031890	tcp11l1	25:15176969-15189190	mut	Mo	OK	3.19137	4.57205	7.76342	0.518666	1.55124	0.0074	0.0418955	yes
ENSDARG00000031891	tbx1	5:14686605-14715567	mut	Mo	OK	1.27865	0.626898	1.90555	-1.02832	-1.88641	0.00225	0.0168401	yes
ENSDARG00000062489	2008-03-01	13:17620873-17880216	mut	Mo	OK	16.5774	25.2032	41.7806	0.604391	1.88506	0.0013	0.0108473	yes
ENSDARG00000031952	mb	1:54460291-54467434	mut	Mo	OK	1.05626	0.353772	1.41003	-1.57808	-1.0173	0.00505	0.0314746	yes
ENSDARG00000100715	tlk1b	6:3716846-3763903	mut	Mo	OK	26.9728	40.9971	67.9699	0.604019	2.33992	0.0001	0.00134605	yes
ENSDARG00000061742	clasrp	18:36620547-36650286	mut	Mo	OK	8.65618	13.1508	21.807	0.603353	2.02763	0.00055	0.00550127	yes
ENSDARG00000032010	slc15a2	9:37510426-37557086	mut	Mo	OK	2.62129	5.48541	8.1067	1.06532	2.02659	0.00055	0.00550127	yes
ENSDARG00000060767	smg7	2:36063720-36096068	mut	Mo	OK	6.48114	9.84629	16.3274	0.603333	2.22128	5e-05	0.000738265	yes
ENSDARG00000098670	map4k4	9:17684-80783	mut	Mo	OK	9.31646	14.1424	23.4589	0.602178	2.13175	0.00035	0.00382708	yes
ENSDARG00000078359	endouc	18:15490812-15498934	mut	Mo	OK	15.4569	23.4624	38.9193	0.602102	2.1703	0.0003	0.00340471	yes
ENSDARG00000032263	zgc:110224	21:30685037-30706157	mut	Mo	OK	5.67442	3.55436	9.22878	-0.674885	-2.03779	0.00035	0.00382708	yes
ENSDARG00000087759	cnih4	16:2232275-2235182	mut	Mo	OK	15.9042	24.1325	40.0367	0.601572	1.68713	0.00375	0.0250925	yes
ENSDARG00000007449	slc25a39	3:29741976-29760658	mut	Mo	OK	12.8184	19.4418	32.2602	0.600943	1.67512	0.00425	0.0275362	yes
ENSDARG00000032496	pon1	16:24731567-24741233	mut	Mo	OK	3.62067	1.36685	4.98752	-1.4054	-4.12272	5e-05	0.000738265	yes
ENSDARG00000104244	twsg1a	2:55065749-55100113	mut	Mo	OK	5.76211	8.7341	14.4962	0.600063	2.15802	0.0002	0.00244048	yes
ENSDARG00000097839	si:ch211-235i11.6	17:50354780-50357130	mut	Mo	OK	4.28786	6.49604	10.7839	0.599301	1.65983	0.0041	0.026744	yes
ENSDARG00000032639	cd36	4:22937496-22950494	mut	Mo	OK	1.35902	0.2382	1.59722	-2.51232	-3.3533	5e-05	0.000738265	yes
ENSDARG00000032856	ccdc120	11:25346333-25380967	mut	Mo	OK	1.87683	2.84624	4.72307	0.600758	1.59817	0.00455	0.0289506	yes
ENSDARG00000016256	nudt3a	23:3768042-3801935	mut	Mo	OK	7.56224	11.4522	19.0144	0.598743	1.8281	0.00205	0.0156467	yes
ENSDARG00000099184	map2k6	12:36415068-36464305	mut	Mo	OK	34.0274	51.5194	85.5468	0.598418	2.31991	0.0001	0.00134605	yes
ENSDARG00000000489	upf3b	14:32999007-33010789	mut	Mo	OK	9.69112	14.665	24.3561	0.597639	1.86323	0.00135	0.0111892	yes
ENSDARG00000011801	wars2	9:21261489-21287544	mut	Mo	OK	7.34524	11.1136	18.4588	0.597444	1.83751	0.0018	0.0140726	yes
ENSDARG00000033020	ppcdc	18:18986472-18990454	mut	Mo	OK	5.54519	3.73443	9.27962	-0.570347	-1.69383	0.0039	0.0257979	yes
ENSDARG00000074686	mgea5	13:11856357-11873532	mut	Mo	OK	42.9615	64.9602	107.922	0.596511	2.33448	5e-05	0.000738265	yes
ENSDARG00000033140	desi1a	3:24842476-24849519	mut	Mo	OK	1.5321	2.68808	4.22018	0.811064	2.01882	0.00095	0.00847242	yes
ENSDARG00000027738	si:ch211-13c6.2	19:42462287-42483850	mut	Mo	OK	17.3289	26.2013	43.5302	0.596458	2.11803	0.00055	0.00550127	yes
ENSDARG00000033201	CRIP2	20:9441225-9474710	mut	Mo	OK	1.26665	0.525936	1.79259	-1.26806	-1.46943	0.00725	0.0412075	yes
ENSDARG00000033231	mcm6l	2:50465507-50491283	mut	Mo	OK	0.794896	1.43266	2.22756	0.849855	1.49249	0.004	0.0262892	yes
ENSDARG00000033234	stmn2a	16:16257051-16274342	mut	Mo	OK	3.03152	1.8068	4.83832	-0.746607	-1.764	0.0026	0.0188503	yes
ENSDARG00000036107	txnipa	19:24810336-24919663	mut	Mo	OK	47.3057	71.4508	118.757	0.594937	2.08328	0.0003	0.00340471	yes
ENSDARG00000017006	dennd5a	7:64752309-64890039	mut	Mo	OK	5.62238	8.48643	14.1088	0.593978	1.73366	0.003	0.0211412	yes
ENSDARG00000088889	si:dkey-108k21.14	25:34556085-34556700	mut	Mo	OK	33.4397	50.4623	83.902	0.593641	2.01584	0.0003	0.00340471	yes
ENSDARG00000101395	CR388132.1	4:29209956-29225170	mut	Mo	OK	8.64033	13.0202	21.6605	0.591593	2.15153	0.0002	0.00244048	yes
ENSDARG00000015824	lemd3	4:12917378-12931237	mut	Mo	OK	9.47839	14.2712	23.7496	0.590398	2.13313	0.00015	0.00190953	yes
ENSDARG00000033444	map4k6	21:33999089-34040617	mut	Mo	OK	0.396178	1.59372	1.9899	2.00817	4.11344	5e-05	0.000738265	yes
ENSDARG00000067670	pomt1	5:50464749-50501705	mut	Mo	OK	8.65347	13.0289	21.6824	0.590367	2.15347	0.0003	0.00340471	yes
ENSDARG00000079780	HNRNPUL1 (1 of many)	5:61136335-61158160	mut	Mo	OK	53.632	80.7192	134.351	0.589816	2.31742	5e-05	0.000738265	yes
ENSDARG00000063321	rabl2	18:7680465-7689785	mut	Mo	OK	15.7539	23.6865	39.4404	0.588352	2.08562	0.00045	0.00467053	yes
ENSDARG00000105350	si:ch1073-153i20.4	7:6296314-6297037	mut	Mo	OK	88.6955	133.344	222.039	0.588215	2.12881	0.0003	0.00340471	yes
ENSDARG00000033735	ncf1	5:60747819-60760976	mut	Mo	OK	1.8984	0.607446	2.50585	-1.64395	-3.18405	5e-05	0.000738265	yes
ENSDARG00000033760	pmelb	23:35573738-35591533	mut	Mo	OK	2.58972	1.23612	3.82584	-1.06698	-2.11921	0.0006	0.00587614	yes
ENSDARG00000059337	tgif1	24:9147022-9159774	mut	Mo	OK	23.5381	35.3587	58.8968	0.587068	1.84197	0.00115	0.00982707	yes
ENSDARG00000033802	cyp27a7	9:38599195-38609345	mut	Mo	OK	1.48728	0.615927	2.10321	-1.27185	-2.14019	0.0003	0.00340471	yes
ENSDARG00000028119	sumo3a	6:10834833-10838453	mut	Mo	OK	86.4358	129.774	216.21	0.586302	2.2655	0.00015	0.00190953	yes
ENSDARG00000077364	mapk9	21:32315931-32341398	mut	Mo	OK	5.82245	8.73329	14.5557	0.584899	1.79318	0.00145	0.0118317	yes
ENSDARG00000033955	CABZ01088025.1	23:44912846-44927926	mut	Mo	OK	0.393315	0.927519	1.32083	1.23769	1.62804	0.008	0.0444234	yes
ENSDARG00000074379	knstrn	1:10423576-10433819	mut	Mo	OK	28.9343	43.3571	72.2914	0.583487	2.14149	0.00025	0.00293113	yes
ENSDARG00000034011	GABRA2 (1 of many)	14:2969717-3094752	mut	Mo	OK	0.356684	1.56989	1.92657	2.13794	2.88968	0.0004	0.00422996	yes
ENSDARG00000034063	CABZ01068208.1	17:53294819-53301747	mut	Mo	OK	2.00083	0.846201	2.84703	-1.24153	-2.51712	5e-05	0.000738265	yes
ENSDARG00000034173	prkcq	4:25402042-25454181	mut	Mo	OK	2.32553	1.34259	3.66812	-0.792539	-2.19586	0.0003	0.00340471	yes
ENSDARG00000034210	si:dkey-240h12.4	19:11249290-11290784	mut	Mo	OK	3.02419	5.11708	8.14127	0.758769	2.10443	0.0004	0.00422996	yes
ENSDARG00000011026	zgc:92907	14:30627127-30630950	mut	Mo	OK	12.7728	19.1392	31.912	0.58346	1.83226	0.0014	0.0115375	yes
ENSDARG00000034273	sid4	1:57971017-57981003	mut	Mo	OK	2.38784	1.08516	3.473	-1.1378	-2.4546	0.0002	0.00244048	yes
ENSDARG00000034300	sema3c	4:22892649-22931969	mut	Mo	OK	2.44801	0.905531	3.35354	-1.43477	-3.18748	5e-05	0.000738265	yes
ENSDARG00000037488	canx	14:16127084-16171210	mut	Mo	OK	63.5332	95.1584	158.692	0.582819	2.27107	5e-05	0.000738265	yes
ENSDARG00000034423	sncga	13:22528702-22542716	mut	Mo	OK	1.27636	0.384151	1.66051	-1.73229	-1.66959	0.00435	0.0279753	yes
ENSDARG00000034443	mpped2	25:14598475-14642658	mut	Mo	OK	2.1094	4.31452	6.42392	1.03237	2.8523	5e-05	0.000738265	yes
ENSDARG00000020417	emx3	14:26065431-26078939	mut	Mo	OK	14.1658	21.2163	35.3821	0.582754	2.21582	0.0001	0.00134605	yes
ENSDARG00000103899	rabepk	5:2452538-2468785	mut	Mo	OK	6.74599	10.1015	16.8475	0.582469	1.82565	0.0018	0.0140726	yes
ENSDARG00000034559	srpx2	14:35102196-35121834	mut	Mo	OK	0.844327	2.02709	2.87142	1.26354	2.58607	5e-05	0.000738265	yes
ENSDARG00000034643	fhl3a	16:33701859-33782801	mut	Mo	OK	3.06022	4.63288	7.6931	0.598276	1.62418	0.0056	0.0339164	yes
ENSDARG00000034650	fabp7b	20:40472146-40473626	mut	Mo	OK	7.43891	0.334773	7.77368	-4.47384	-3.52562	5e-05	0.000738265	yes
ENSDARG00000053097	hsf2	20:40578465-40590174	mut	Mo	OK	13.094	19.6039	32.6979	0.582234	1.87209	0.0013	0.0108473	yes
ENSDARG00000042796	yy1a	17:30840044-30846289	mut	Mo	OK	58.1974	87.1123	145.31	0.581922	2.27178	0.0001	0.00134605	yes
ENSDARG00000090656	tomm20a	13:49306380-49375937	mut	Mo	OK	7.17175	10.734	17.9058	0.581798	1.6786	0.0036	0.0244086	yes
ENSDARG00000043713	asf1bb	1:55200461-55211319	mut	Mo	OK	15.1008	22.5993	37.7001	0.58165	2.10093	0.00025	0.00293113	yes
ENSDARG00000034801	mylka	9:4055592-4130389	mut	Mo	OK	1.65637	0.0234102	1.67978	-6.14475	-2.68933	0.001	0.00882317	yes
ENSDARG00000020623	baxa	3:37634630-37644015	mut	Mo	OK	15.6216	23.3593	38.9809	0.580449	2.08917	0.00015	0.00190953	yes
ENSDARG00000099358	hccsb	24:31144687-31155500	mut	Mo	OK	9.89818	14.797	24.6952	0.580065	1.71502	0.0033	0.0227386	yes
ENSDARG00000036162	hnrnpa0b	14:38505189-38507852	mut	Mo	OK	78.3503	117.059	195.409	0.579223	2.10631	0.00025	0.00293113	yes
ENSDARG00000044092	atpif1b	17:24594853-24596323	mut	Mo	OK	17.1865	25.6742	42.8607	0.579042	1.80061	0.00195	0.0150354	yes
ENSDARG00000035169	layna	5:57215831-57227791	mut	Mo	OK	0.968837	1.94186	2.9107	1.00311	1.62129	0.00885	0.0477389	yes
ENSDARG00000056509	pdik1l	19:15581193-15613029	mut	Mo	OK	9.88386	14.7647	24.6486	0.579001	1.68575	0.0003	0.00340471	yes
ENSDARG00000001769	ptpra	21:15660571-15720340	mut	Mo	OK	6.40816	9.57145	15.9796	0.578827	2.07592	0.00035	0.00382708	yes
ENSDARG00000035257	akr1a1a	5:40920885-40931476	mut	Mo	OK	0.953596	0	0.953596	#NAME?	#NAME?	5e-05	0.000738265	yes
ENSDARG00000003151	skp1	21:45300974-45308737	mut	Mo	OK	96.3392	143.863	240.202	0.578499	2.13699	0.00035	0.00382708	yes
ENSDARG00000011727	b9d1	3:39549666-39554208	mut	Mo	OK	23.5887	35.2182	58.8069	0.578222	1.55337	0.00745	0.0421237	yes
ENSDARG00000035322	myh7bb	23:18796371-18830994	mut	Mo	OK	1.0748	0.681703	1.7565	-0.656851	-1.67225	0.00405	0.0264974	yes
ENSDARG00000057151	prep	20:48607290-48657296	mut	Mo	OK	22.5324	33.6232	56.1556	0.577459	2.18254	0.0001	0.00134605	yes
ENSDARG00000013741	lancl1	1:6834015-6871030	mut	Mo	OK	15.4829	23.0996	38.5825	0.577193	1.93432	0.00045	0.00467053	yes
ENSDARG00000042252	eif4h	15:4594118-4625781	mut	Mo	OK	19.464	29.031	48.495	0.576785	2.06838	0.0003	0.00340471	yes
ENSDARG00000061600	tmem2	5:25160000-25213470	mut	Mo	OK	10.7562	16.0406	26.7968	0.576562	1.98012	0.00015	0.00190953	yes
ENSDARG00000036625	polr2f	3:2032081-2041540	mut	Mo	OK	21.4534	31.983	53.4364	0.576103	1.81345	0.00205	0.0156467	yes
ENSDARG00000035538	atp6v0a2a	10:8030045-8074768	mut	Mo	OK	2.71487	3.93745	6.65232	0.536378	1.71847	0.0031	0.0216963	yes
ENSDARG00000035544	etnppl	7:59773895-59785278	mut	Mo	OK	1.12594	0.182174	1.30811	-2.62774	-3.11339	0.0004	0.00422996	yes
ENSDARG00000030905	cited2	20:37012263-37014791	mut	Mo	OK	18.6763	27.8409	46.5172	0.575998	2.19232	0.00025	0.00293113	yes
ENSDARG00000102311	BX572103.3	4:65066131-65181818	mut	Mo	OK	4.24643	6.32618	10.5726	0.575083	1.59214	0.006	0.0356672	yes
ENSDARG00000035569	cyp1d1	5:25006504-25021233	mut	Mo	OK	3.12508	4.65512	7.7802	0.574926	1.72295	0.0032	0.0221904	yes
ENSDARG00000035578	hs3st1l2	5:20596555-20637290	mut	Mo	OK	2.34784	1.27173	3.61957	-0.884548	-2.07064	0.0012	0.0101792	yes
ENSDARG00000017140	zgc:63587	8:4564975-4638223	mut	Mo	OK	44.4359	66.1652	110.601	0.574347	2.21265	0.0002	0.00244048	yes
ENSDARG00000028198	ube2v2	24:35634200-35646176	mut	Mo	OK	49.7188	74.0169	123.736	0.574064	2.24333	0.00015	0.00190953	yes
ENSDARG00000091061	slc38a3b	6:53149116-53227563	mut	Mo	OK	27.9479	41.6042	69.5521	0.573989	2.02101	0.0003	0.00340471	yes
ENSDARG00000021149	cbr1l	21:21596576-21604558	mut	Mo	OK	33.2195	49.4427	82.6622	0.573729	2.20458	0.00015	0.00190953	yes
ENSDARG00000035649	ext1c	19:47719423-47744812	mut	Mo	OK	1.00624	2.26569	3.27193	1.17097	2.0345	0.00145	0.0118317	yes
ENSDARG00000035682	LTBP3	5:36917523-36985323	mut	Mo	OK	0.523094	0.902575	1.42567	0.786977	1.93015	0.0013	0.0108473	yes
ENSDARG00000076246	prune	16:38289994-38316853	mut	Mo	OK	8.74408	13.0134	21.7575	0.573618	1.7799	0.0024	0.0177259	yes
ENSDARG00000029011	xpnpep1	22:27230016-27252789	mut	Mo	OK	16.6622	24.7928	41.455	0.573336	2.15279	0.00015	0.00190953	yes
ENSDARG00000058452	abhd17c	7:10669755-10764279	mut	Mo	OK	14.4405	21.4834	35.9239	0.573101	1.91956	0.0009	0.0081056	yes
ENSDARG00000035797	si:dkey-17m8.2	16:18235422-18246297	mut	Mo	OK	0.741485	2.10229	2.84377	1.50347	2.11798	0.00055	0.00550127	yes
ENSDARG00000030765	hadh	1:49265845-49275216	mut	Mo	OK	29.0551	43.1852	72.2403	0.571745	2.15661	0.0003	0.00340471	yes
ENSDARG00000029248	fubp1	2:8851287-8865099	mut	Mo	OK	104.937	155.944	260.881	0.571503	2.1989	5e-05	0.000738265	yes
ENSDARG00000101019	ext1b	19:46829093-46865351	mut	Mo	OK	9.95299	14.7858	24.7388	0.571009	1.9373	0.00095	0.00847242	yes
ENSDARG00000035732	arntl1b	7:65824453-65882180	mut	Mo	OK	14.9801	22.2445	37.2246	0.570405	1.75303	0.0029	0.0205785	yes
ENSDARG00000035887	zgc:91944	19:32984682-33013842	mut	Mo	OK	0.625302	1.77063	2.39593	1.50164	1.67242	0.0085	0.046384	yes
ENSDARG00000005908	clk4b	21:32247650-32267851	mut	Mo	OK	34.8985	51.8022	86.7007	0.569846	1.91317	0.00085	0.00771532	yes
ENSDARG00000035904	crabp1b	7:48047139-48069974	mut	Mo	OK	2.68169	1.09235	3.77404	-1.29571	-2.07946	0.00135	0.0111892	yes
ENSDARG00000035907	fam49a	19:31046139-31096365	mut	Mo	OK	2.96278	4.21746	7.18024	0.509422	1.63367	0.00535	0.0328375	yes
ENSDARG00000059386	dtwd1	18:5390077-5393084	mut	Mo	OK	7.06364	10.484	17.5476	0.569709	1.62538	0.00515	0.0319602	yes
ENSDARG00000035942	hrh3	7:41468619-41473164	mut	Mo	OK	0.556279	1.05185	1.60813	0.919047	1.80732	0.0024	0.0177259	yes
ENSDARG00000035961	KCNG2	19:11590017-11644465	mut	Mo	OK	0.922983	0.457224	1.38021	-1.0134	-1.89324	0.00275	0.0196911	yes
ENSDARG00000004706	syf2	13:45294755-45306104	mut	Mo	OK	47.6004	70.6463	118.247	0.569641	2.1488	0.00015	0.00190953	yes
ENSDARG00000101332	uba2	25:12715118-12728170	mut	Mo	OK	48.6117	72.1228	120.734	0.569152	2.15924	0.0002	0.00244048	yes
ENSDARG00000036059	tmppe	7:28881867-28890773	mut	Mo	OK	1.62828	0.902169	2.53045	-0.851878	-1.99631	0.00115	0.00982707	yes
ENSDARG00000036074	cebpa	7:37813727-37816607	mut	Mo	OK	1.70931	1.05191	2.76122	-0.700395	-1.6835	0.00455	0.0289506	yes
ENSDARG00000036082	tph1b	7:32835181-32843734	mut	Mo	OK	0.65761	1.25177	1.90938	0.928666	1.79003	0.0026	0.0188503	yes
ENSDARG00000091631	si:ch211-197h24.6	16:27608684-27624273	mut	Mo	OK	38.8592	57.6377	96.4969	0.568757	2.0278	0.00015	0.00190953	yes
ENSDARG00000075627	abhd10b	24:21782012-21789056	mut	Mo	OK	12.4356	18.434	30.8696	0.567891	1.89916	0.0009	0.0081056	yes
ENSDARG00000087530	wu:fe05a04	16:25256799-25266510	mut	Mo	OK	8.86571	13.1403	22.006	0.567685	2.09813	0.0004	0.00422996	yes
ENSDARG00000036116	eif3hb	19:46265566-46369607	mut	Mo	OK	3.07485	6.3488	9.42365	1.04597	1.39299	0.00915	0.0489315	yes
ENSDARG00000075107	nkx2.4a	17:42106372-42108393	mut	Mo	OK	6.84751	10.1489	16.9964	0.56767	1.74155	0.0025	0.0183242	yes
ENSDARG00000092499	si:ch211-183d21.1	24:37518814-37541346	mut	Mo	OK	6.21463	9.20851	15.4231	0.567301	1.99065	0.0007	0.00664197	yes
ENSDARG00000031981	pcbd1	13:25590518-25596084	mut	Mo	OK	31.041	45.9617	77.0027	0.566254	2.00737	0.00025	0.00293113	yes
ENSDARG00000088590	pxna	5:6110302-6155553	mut	Mo	OK	5.34805	7.91564	13.2637	0.565694	1.75712	0.0015	0.0121938	yes
ENSDARG00000000666	creg2	9:7249691-7260448	mut	Mo	OK	6.48214	9.59265	16.0748	0.56546	1.92458	0.0009	0.0081056	yes
ENSDARG00000036272	gcgrb	1:55675354-55693812	mut	Mo	OK	1.04644	0.559463	1.6059	-0.90337	-1.53667	0.0089	0.0479341	yes
ENSDARG00000060748	tsfm	6:39900006-39905895	mut	Mo	OK	17.3561	25.6635	43.0196	0.564271	1.96336	0.00075	0.00701292	yes
ENSDARG00000052155	lrrc8ab	5:64159512-64169166	mut	Mo	OK	5.86086	8.66604	14.5269	0.564259	1.77277	0.0023	0.0171404	yes
ENSDARG00000036337	cers3b	18:7350119-7367033	mut	Mo	OK	1.09665	0.33009	1.42674	-1.73217	-1.66309	0.002	0.0153596	yes
ENSDARG00000036345	cmtr2	7:24443682-24448498	mut	Mo	OK	3.47701	5.10084	8.57785	0.552889	1.75015	0.0021	0.0159651	yes
ENSDARG00000036371	acta1a	1:53286190-53293789	mut	Mo	OK	3.64888	1.11387	4.76275	-1.71187	-3.36199	5e-05	0.000738265	yes
ENSDARG00000036457	cacng6a	19:9813158-9879945	mut	Mo	OK	2.96958	1.65071	4.62029	-0.84717	-1.57385	0.0089	0.0479341	yes
ENSDARG00000105323	si:ch1073-456m8.1	11:222893-232327	mut	Mo	OK	11.5691	17.078	28.6471	0.561868	1.43695	0.0022	0.0165586	yes
ENSDARG00000037079	cfap36	13:25566-30665	mut	Mo	OK	8.00583	11.8148	19.8206	0.56147	1.76426	0.00215	0.0162528	yes
ENSDARG00000036571	sema3e	18:9524529-9607588	mut	Mo	OK	1.00206	0.554398	1.55646	-0.853973	-1.74844	0.00355	0.0241639	yes
ENSDARG00000036587	cbr1	1:46474609-46482000	mut	Mo	OK	3.51537	1.93649	5.45186	-0.860231	-2.65599	5e-05	0.000738265	yes
ENSDARG00000010873	DDX17	6:20044728-20085704	mut	Mo	OK	57.491	84.8271	142.318	0.561188	2.01191	0.0008	0.00734984	yes
ENSDARG00000079248	mn1b	5:65997250-66023374	mut	Mo	OK	20.7723	30.6224	51.3947	0.559923	2.19156	0.00025	0.00293113	yes
ENSDARG00000077265	wdr89	13:37343202-37349099	mut	Mo	OK	7.04409	10.383	17.4271	0.559742	1.97052	0.0004	0.00422996	yes
ENSDARG00000022430	ppp1r8b	16:4570392-4811289	mut	Mo	OK	20.0881	29.6081	49.6962	0.559651	1.72662	0.00305	0.0213894	yes
ENSDARG00000036776	aldh8a1	23:31826072-31837222	mut	Mo	OK	3.62554	1.12511	4.75065	-1.68813	-3.72916	5e-05	0.000738265	yes
ENSDARG00000076472	ovol1	7:19583600-19596069	mut	Mo	OK	4.91599	7.24484	12.1608	0.559471	1.84898	0.0015	0.0121938	yes
ENSDARG00000036840	krt15	11:11532156-11534848	mut	Mo	OK	2.42999	0.334448	2.76444	-2.8611	-4.01936	5e-05	0.000738265	yes
ENSDARG00000042530	nup205	18:12267317-12302162	mut	Mo	OK	40.6343	59.8534	100.488	0.558735	2.17538	0.00015	0.00190953	yes
ENSDARG00000036863	MYO1D	12:28262842-28422713	mut	Mo	OK	3.41329	4.97928	8.39257	0.544773	1.97692	0.0005	0.00507126	yes
ENSDARG00000018914	hnrnpk	8:49756898-49777472	mut	Mo	OK	94.5395	139.249	233.788	0.55868	1.56202	0.00445	0.0284708	yes
ENSDARG00000036869	tcf21	23:31627737-31629165	mut	Mo	OK	1.41549	0.484078	1.89957	-1.54799	-1.99469	0.0042	0.0272529	yes
ENSDARG00000036878	sh3bgrl2	23:31478965-31497198	mut	Mo	OK	3.48521	1.7772	5.26241	-0.971638	-2.54577	5e-05	0.000738265	yes
ENSDARG00000005828	faima	9:23937472-23944468	mut	Mo	OK	13.5072	19.8826	33.3898	0.557774	1.85138	0.00135	0.0111892	yes
ENSDARG00000098414	ninl	13:9859593-9885119	mut	Mo	OK	5.19107	7.64068	12.8317	0.557668	1.80411	0.00165	0.0131004	yes
ENSDARG00000036912	edn1	19:3435531-3440524	mut	Mo	OK	3.71625	1.32236	5.03861	-1.49073	-3.03586	5e-05	0.000738265	yes
ENSDARG00000020611	si:ch211-160d20.3	18:36801921-36819033	mut	Mo	OK	12.6107	18.5614	31.1721	0.557654	1.70318	0.00375	0.0250925	yes
ENSDARG00000036966	hsd3b7	3:32612231-32646536	mut	Mo	OK	1.36384	0.605153	1.96899	-1.1723	-1.75529	0.0008	0.00734984	yes
ENSDARG00000036974	ripply3	10:116986-120584	mut	Mo	OK	2.5781	0.637854	3.21595	-2.01501	-1.86659	0.0086	0.046812	yes
ENSDARG00000036985	plxnb2b	25:5385508-5553420	mut	Mo	OK	0.85544	1.27744	2.13288	0.578517	1.60254	0.0067	0.0388833	yes
ENSDARG00000036987	has2	16:15479513-15497339	mut	Mo	OK	1.3117	0.659018	1.97072	-0.993045	-2.50154	0.00015	0.00190953	yes
ENSDARG00000078935	ttll4	9:14141271-14175950	mut	Mo	OK	19.2589	28.3455	47.6044	0.557593	2.17253	0.0001	0.00134605	yes
ENSDARG00000102090	CABZ01021453.1	4:71273519-71279036	mut	Mo	OK	5.60928	8.24321	13.8525	0.555391	1.92061	0.0011	0.00949324	yes
ENSDARG00000037030	casz1	23:29029708-29138989	mut	Mo	OK	1.27401	0.665945	1.93996	-0.935904	-2.66093	5e-05	0.000738265	yes
ENSDARG00000005350	dip2ba	23:27432180-27516020	mut	Mo	OK	9.81532	14.4174	24.2327	0.554699	2.14664	0.0004	0.00422996	yes
ENSDARG00000037140	pfkfb1	23:26090685-26111428	mut	Mo	OK	3.34326	5.1915	8.53476	0.634897	1.78059	0.00215	0.0162528	yes
ENSDARG00000051737	zgc:173552	25:35779903-35780314	mut	Mo	OK	686.649	1008.49	1695.14	0.554553	2.17421	0.0001	0.00134605	yes
ENSDARG00000037174	nek12	14:28120643-28126741	mut	Mo	OK	0.996896	1.93401	2.93091	0.956082	2.02343	0.00085	0.00771532	yes
ENSDARG00000037192	zgc:113364	14:28224194-28228605	mut	Mo	OK	0.234529	2.88706	3.12159	3.62176	2.9411	0.0005	0.00507126	yes
ENSDARG00000037245	trmo	1:25974157-25982677	mut	Mo	OK	6.29077	3.64932	9.94009	-0.78561	-2.01199	0.0007	0.00664197	yes
ENSDARG00000016782	huwe1	23:28563395-28642437	mut	Mo	OK	21.6335	31.7607	53.3942	0.553974	2.00965	0.00035	0.00382708	yes
ENSDARG00000037281	fgg	1:24978969-24988554	mut	Mo	OK	5.00903	1.38966	6.39869	-1.8498	-3.52167	5e-05	0.000738265	yes
ENSDARG00000011597	atxn2l	3:15244627-15275891	mut	Mo	OK	4.58583	6.73159	11.3174	0.553767	1.92526	0.001	0.00882317	yes
ENSDARG00000090230	tmem108	24:9603625-9732820	mut	Mo	OK	12.4708	18.3029	30.7737	0.553515	2.00988	0.00035	0.00382708	yes
ENSDARG00000074301	cth	6:37431663-37444947	mut	Mo	OK	42.7018	62.6527	105.355	0.55308	2.15545	0.00035	0.00382708	yes
ENSDARG00000037421	egr1	14:21035276-21039140	mut	Mo	OK	1.03648	0.439641	1.47612	-1.23729	-2.36837	0.00015	0.00190953	yes
ENSDARG00000037455	ugt8	1:19863129-19914215	mut	Mo	OK	5.45158	4.01487	9.46645	-0.441322	-1.56344	0.00615	0.0363969	yes
ENSDARG00000093591	si:ch211-282k23.2	18:39947032-39948342	mut	Mo	OK	6.35639	9.32527	15.6817	0.552937	1.56117	0.0081	0.0448068	yes
ENSDARG00000037496	gria4a	15:44475743-44790596	mut	Mo	OK	1.76098	0.833911	2.59489	-1.07841	-2.01348	0.0005	0.00507126	yes
ENSDARG00000037551	pm20d1.1	23:18094584-18104060	mut	Mo	OK	0.205849	1.01228	1.21813	2.29795	1.60242	0.00465	0.0294037	yes
ENSDARG00000037555	atoh8	14:9201276-9216350	mut	Mo	OK	4.74598	1.70807	6.45405	-1.47434	-3.91844	5e-05	0.000738265	yes
ENSDARG00000037619	GNA12 (1 of many)	1:10973179-10982180	mut	Mo	OK	1.64835	0.455499	2.10385	-1.8555	-2.62349	0.0006	0.00587614	yes
ENSDARG00000037645	zgc:173570	23:16904719-16923172	mut	Mo	OK	1.07815	0.520079	1.59823	-1.05175	-1.61972	0.00865	0.0469664	yes
ENSDARG00000077906	rnf165a	21:4809690-4842598	mut	Mo	OK	22.8549	33.516	56.3709	0.552345	1.50275	0.0093	0.0495353	yes
ENSDARG00000080337	AC024175.4	MT:2042-3725	mut	Mo	OK	842.024	1234.63	2076.65	0.552148	1.93973	0.00065	0.00626337	yes
ENSDARG00000095019	lmo2	18:38307868-38315657	mut	Mo	OK	16.6914	24.4741	41.1655	0.552146	2.04264	0.0006	0.00587614	yes
ENSDARG00000098859	NOP14	21:309088-332090	mut	Mo	OK	14.7007	21.5501	36.2508	0.551813	2.04663	0.0002	0.00244048	yes
ENSDARG00000097650	atg2b	17:43014889-43021852	mut	Mo	OK	4.0937	5.99935	10.093	0.551401	1.58183	0.0068	0.0393191	yes
ENSDARG00000057729	ephb6	16:12444371-12579132	mut	Mo	OK	5.63116	8.24883	13.88	0.550758	1.9555	0.00075	0.00701292	yes
ENSDARG00000037833	mitfb	23:698281-751342	mut	Mo	OK	0.546351	1.1532	1.69955	1.07774	1.68457	0.00625	0.0368256	yes
ENSDARG00000041226	cdc40	20:53563193-53596582	mut	Mo	OK	10.3764	15.1962	25.5726	0.550409	1.95677	0.00075	0.00701292	yes
ENSDARG00000037843	tor4aa	10:3030375-3038993	mut	Mo	OK	2.31594	1.21226	3.5282	-0.933897	-1.97535	0.00125	0.0105211	yes
ENSDARG00000057321	tut1	12:10299830-10314158	mut	Mo	OK	11.0104	16.1236	27.134	0.55031	2.04111	0.00035	0.00382708	yes
ENSDARG00000037861	slc2a3b	16:12583958-12605730	mut	Mo	OK	1.32653	0.594035	1.92056	-1.15903	-1.36806	0.0078	0.0436901	yes
ENSDARG00000018904	cstf3	18:45703161-45765046	mut	Mo	OK	80.7712	118.227	198.998	0.549651	1.6936	0.00305	0.0213894	yes
ENSDARG00000037883	prcp	15:11295850-11382679	mut	Mo	OK	0.892297	0.22395	1.11625	-1.99435	-2.94581	0.00015	0.00190953	yes
ENSDARG00000037894	ezh1	3:36717711-36750793	mut	Mo	OK	0.890147	1.76576	2.65591	0.988178	1.72605	0.0028	0.0199914	yes
ENSDARG00000078324	PRDM16	8:48103918-48553386	mut	Mo	OK	4.09309	5.98803	10.0811	0.548891	1.69005	0.003	0.0211412	yes
ENSDARG00000037913	nmrk1	3:34468232-34470154	mut	Mo	OK	5.05246	3.15908	8.21154	-0.677483	-1.51082	0.00885	0.0477389	yes
ENSDARG00000037921	gng13b	3:35459703-35472725	mut	Mo	OK	1.04253	0.433036	1.47557	-1.26753	-1.88957	0.00365	0.0246418	yes
ENSDARG00000037932	lin7b	3:31802178-31812995	mut	Mo	OK	2.7739	1.5315	4.3054	-0.856966	-1.91081	0.00165	0.0131004	yes
ENSDARG00000094243	shda	2:52473121-52500743	mut	Mo	OK	10.9538	16.0192	26.973	0.548364	1.89425	0.0012	0.0101792	yes
ENSDARG00000016871	smarce1	3:34856361-34865480	mut	Mo	OK	56.7705	82.9721	139.743	0.547484	2.14335	0.00035	0.00382708	yes
ENSDARG00000037960	lrrc17	4:20420215-20435110	mut	Mo	OK	1.36134	0.621556	1.9829	-1.13107	-2.45562	0.0002	0.00244048	yes
ENSDARG00000100317	ahsa1b	17:43736750-43749935	mut	Mo	OK	22.5265	32.9201	55.4466	0.547349	1.98432	0.00055	0.00550127	yes
ENSDARG00000014793	ehd1b	10:27106537-27131321	mut	Mo	OK	8.98831	13.1207	22.109	0.545721	1.98746	0.00035	0.00382708	yes
ENSDARG00000000068	slc9a3r1	12:33383474-33436143	mut	Mo	OK	12.2825	17.928	30.2105	0.545608	1.87982	0.00075	0.00701292	yes
ENSDARG00000042835	tfdp2	15:4430649-4537240	mut	Mo	OK	15.1879	22.1387	37.3266	0.543648	1.73106	0.00205	0.0156467	yes
ENSDARG00000038095	socs1a	3:26682186-26684082	mut	Mo	OK	1.63272	0.601342	2.23406	-1.44102	-2.06961	0.0016	0.0128266	yes
ENSDARG00000004806	grwd1	16:13964918-13980779	mut	Mo	OK	31.3346	45.6465	76.9811	0.542747	1.88935	0.001	0.00882317	yes
ENSDARG00000045951	kat5b	5:66054183-66070430	mut	Mo	OK	9.20149	13.3961	22.5976	0.541877	1.77008	0.00275	0.0196911	yes
ENSDARG00000095921	si:ch1073-325m22.2	2:57055558-57069993	mut	Mo	OK	106.011	154.291	260.302	0.541444	1.67129	0.00345	0.0235757	yes
ENSDARG00000091563	snw1	20:5336407-5355538	mut	Mo	OK	32.5475	47.3639	79.9114	0.541241	2.0901	0.0001	0.00134605	yes
ENSDARG00000014348	stk17b	9:24381500-24390290	mut	Mo	OK	10.6791	15.5396	26.2187	0.541158	1.88699	0.00075	0.00701292	yes
ENSDARG00000038359	enosf1	7:56807802-56828567	mut	Mo	OK	2.884	1.21611	4.10011	-1.2458	-2.15914	0.00015	0.00190953	yes
ENSDARG00000053485	aldh6a1	17:44959413-45000078	mut	Mo	OK	31.0497	45.1761	76.2258	0.540979	2.0544	0.0004	0.00422996	yes
ENSDARG00000038424	si:dkey-8k3.2	16:16757225-16793741	mut	Mo	OK	0.834063	0.317618	1.15168	-1.39286	-1.61605	0.0021	0.0159651	yes
ENSDARG00000061030	vezf1b	15:31363283-31384634	mut	Mo	OK	5.57453	8.11072	13.6852	0.540979	1.68041	0.00375	0.0250925	yes
ENSDARG00000041720	arpc5la	8:41446057-41455100	mut	Mo	OK	6.17936	8.98726	15.1666	0.540423	1.65884	0.0036	0.0244086	yes
ENSDARG00000004270	atl3	14:30433717-30454510	mut	Mo	OK	4.61002	6.7011	11.3111	0.539626	1.50185	0.00705	0.0402817	yes
ENSDARG00000037017	ube4b	23:29580747-29627157	mut	Mo	OK	10.3971	15.1072	25.5043	0.539061	2.00626	0.0004	0.00422996	yes
ENSDARG00000038643	alas2	8:21321757-21340400	mut	Mo	OK	4.06344	2.68668	6.75012	-0.596878	-1.5811	0.00595	0.035455	yes
ENSDARG00000038703	hkdc1	13:22887047-22901353	mut	Mo	OK	1.69302	0.800098	2.49312	-1.08135	-2.57204	0.0001	0.00134605	yes
ENSDARG00000038720	si:ch211-14a17.7	2:38300318-38302421	mut	Mo	OK	1.24893	3.7665	5.01543	1.59253	2.96244	5e-05	0.000738265	yes
ENSDARG00000059843	fam135a	13:39056208-39102492	mut	Mo	OK	8.50921	12.3573	20.8665	0.538263	1.8625	0.0004	0.00422996	yes
ENSDARG00000038867	shhb	2:30067007-30071899	mut	Mo	OK	4.57298	2.65054	7.22352	-0.786846	-2.22624	0.00015	0.00190953	yes
ENSDARG00000035508	barhl1a	5:29146201-29150224	mut	Mo	OK	8.31774	12.079	20.3967	0.538234	1.85206	0.0008	0.00734984	yes
ENSDARG00000092660	cyp27c1	6:9332609-9346410	mut	Mo	OK	17.9012	25.9901	43.8913	0.53791	2.05683	0.0004	0.00422996	yes
ENSDARG00000055659	gpr161	9:34339528-34353191	mut	Mo	OK	7.09426	10.2983	17.3926	0.537681	1.79361	0.0019	0.0147087	yes
ENSDARG00000038957	flvcr2a	17:51816810-51840175	mut	Mo	OK	0.893592	0.390153	1.28375	-1.19558	-1.64291	0.00505	0.0314746	yes
ENSDARG00000043720	cdc45	8:4677737-4704456	mut	Mo	OK	13.272	19.2649	32.5369	0.537589	1.9813	0.0003	0.00340471	yes
ENSDARG00000021252	cct6a	21:41807148-41848869	mut	Mo	OK	217.96	316.332	534.292	0.537379	1.96273	0.0005	0.00507126	yes
ENSDARG00000039062	morn4	13:40620390-40628609	mut	Mo	OK	1.29372	2.54872	3.84244	0.978255	1.4803	0.00445	0.0284708	yes
ENSDARG00000039066	klhl31	13:2303262-2315264	mut	Mo	OK	0.925317	0.396382	1.3217	-1.22306	-2.17977	0.0002	0.00244048	yes
ENSDARG00000039077	tyr	15:43776249-43795256	mut	Mo	OK	6.88721	1.3816	8.26881	-2.31758	-5.85729	5e-05	0.000738265	yes
ENSDARG00000039108	trim35-9	3:8253475-8407381	mut	Mo	OK	2.55692	1.34589	3.90281	-0.925841	-1.73426	0.0048	0.0302092	yes
ENSDARG00000018162	ctnnal1	19:35164566-35286446	mut	Mo	OK	11.8632	17.2103	29.0735	0.53678	1.98274	0.0006	0.00587614	yes
ENSDARG00000005104	limk2	5:20319608-20359574	mut	Mo	OK	8.55522	12.4098	20.965	0.536603	1.38244	0.00365	0.0246418	yes
ENSDARG00000039164	mhc1uma	22:5323740-5328885	mut	Mo	OK	2.71877	0.920401	3.63917	-1.56262	-3.12239	5e-05	0.000738265	yes
ENSDARG00000035610	zgc:113208	5:22101729-22117617	mut	Mo	OK	16.8474	24.4221	41.2695	0.535663	1.4907	0.0088	0.0476171	yes
ENSDARG00000059925	usp24	20:7453148-7595747	mut	Mo	OK	9.26802	13.4341	22.7021	0.535571	1.90525	0.0008	0.00734984	yes
ENSDARG00000039241	prkca	6:19167655-19330214	mut	Mo	OK	5.55598	3.82398	9.37996	-0.538967	-1.66039	0.0042	0.0272529	yes
ENSDARG00000039322	CABZ01088149.1	2:2777536-2783095	mut	Mo	OK	2.79811	4.82855	7.62666	0.787135	2.44815	0.0001	0.00134605	yes
ENSDARG00000039374	apool	5:22348056-22364850	mut	Mo	OK	3.9021	2.60181	6.50391	-0.584732	-1.55542	0.0076	0.0428045	yes
ENSDARG00000045372	ngdn	24:14396593-14412739	mut	Mo	OK	38.2463	55.4327	93.679	0.535418	1.59392	0.00525	0.032361	yes
ENSDARG00000039422	fuom	13:24453950-24457770	mut	Mo	OK	2.07537	0.406079	2.48145	-2.35353	-2.50074	0.00475	0.0299488	yes
ENSDARG00000039459	qsox1	8:14465904-14517080	mut	Mo	OK	4.03294	2.67767	6.71061	-0.590857	-1.79468	0.0024	0.0177259	yes
ENSDARG00000039466	hnrnph3	13:22733065-22741967	mut	Mo	OK	1.35272	2.28855	3.64127	0.758573	1.5376	0.00845	0.0462566	yes
ENSDARG00000099946	fam189a2	5:52098809-52137559	mut	Mo	OK	5.57174	8.07166	13.6434	0.534738	1.5654	0.00615	0.0363969	yes
ENSDARG00000099510	cnn3a	24:31233150-31257636	mut	Mo	OK	17.4413	25.2554	42.6967	0.534082	1.97378	0.0006	0.00587614	yes
ENSDARG00000039516	c8a	2:2374645-2401596	mut	Mo	OK	1.17062	0.274204	1.44482	-2.09395	-1.48128	0.0062	0.0366055	yes
ENSDARG00000039522	tubb2	2:1667470-1677238	mut	Mo	OK	3.55988	2.33526	5.89514	-0.608244	-1.54938	0.0081	0.0448068	yes
ENSDARG00000074166	birc6	17:22567519-22721893	mut	Mo	OK	7.66648	11.0971	18.7636	0.533543	2.04978	0.00025	0.00293113	yes
ENSDARG00000039563	loxl3b	13:15103528-15273579	mut	Mo	OK	2.02817	3.52939	5.55756	0.799236	1.90889	0.00125	0.0105211	yes
ENSDARG00000039569	emx1	13:14873405-14879691	mut	Mo	OK	6.28478	3.46162	9.7464	-0.860416	-2.25337	0.0002	0.00244048	yes
ENSDARG00000069331	trip6	7:19726465-19747186	mut	Mo	OK	5.67171	8.20883	13.8805	0.533394	1.7517	0.0025	0.0183242	yes
ENSDARG00000091900	si:ch73-54n14.2	13:10362444-10488200	mut	Mo	OK	13.8675	20.0703	33.9378	0.533356	1.52016	0.0085	0.046384	yes
ENSDARG00000058479	zgc:110425	7:6333315-6334614	mut	Mo	OK	22.2056	32.1327	54.3383	0.533119	1.88949	0.0011	0.00949324	yes
ENSDARG00000039615	fgf8b	1:30905705-30910934	mut	Mo	OK	1.73409	0.617741	2.35183	-1.4891	-2.96493	5e-05	0.000738265	yes
ENSDARG00000094890	si:ch211-163b2.4	8:45009752-45016649	mut	Mo	OK	11.0739	16.0105	27.0844	0.531848	1.98801	0.00025	0.00293113	yes
ENSDARG00000039750	ldlrap1b	13:45458994-45491957	mut	Mo	OK	2.59558	4.58346	7.17904	0.820381	1.95739	0.0011	0.00949324	yes
ENSDARG00000010710	msi1	8:39573168-39613442	mut	Mo	OK	59.0109	85.2793	144.29	0.531213	1.69918	0.0032	0.0221904	yes
ENSDARG00000041428	yrdc	16:4353569-4361437	mut	Mo	OK	6.66201	9.6207	16.2827	0.530185	1.7281	0.0035	0.0238704	yes
ENSDARG00000039899	zbtb7a	22:20347385-20360278	mut	Mo	OK	2.96861	4.56731	7.53592	0.621556	1.75185	0.0029	0.0205785	yes
ENSDARG00000057772	2007-03-01	6:11529913-11576797	mut	Mo	OK	9.9601	14.3795	24.3396	0.52978	1.60455	0.0051	0.0317293	yes
ENSDARG00000097496	si:dkey-6e2.2	6:51529208-51541489	mut	Mo	OK	5.59367	8.0746	13.6683	0.529595	1.76387	0.0022	0.0165586	yes
ENSDARG00000062752	mfap3l	7:7428825-7442817	mut	Mo	OK	8.88849	12.8268	21.7153	0.529151	2.0241	0.00025	0.00293113	yes
ENSDARG00000078954	rxrba	19:7323191-7355919	mut	Mo	OK	59.8635	86.3831	146.247	0.529072	1.5131	0.0077	0.0432136	yes
ENSDARG00000039966	prom1a	14:47469009-47629494	mut	Mo	OK	1.50083	2.57259	4.07342	0.777464	1.42659	0.0019	0.0147087	yes
ENSDARG00000098832	fam168a	18:6551968-6650101	mut	Mo	OK	14.9074	21.5088	36.4162	0.528896	1.90835	0.00145	0.0118317	yes
ENSDARG00000040027	osbpl10	16:39321147-39432578	mut	Mo	OK	4.93533	3.21297	8.1483	-0.619239	-1.94852	0.00105	0.00918036	yes
ENSDARG00000100223	si:zfos-1011f11.1	1:65690-72103	mut	Mo	OK	21.6119	31.1746	52.7865	0.528548	1.55557	0.0061	0.0361626	yes
ENSDARG00000061124	srpr	18:44832718-44854401	mut	Mo	OK	11.4971	16.5839	28.081	0.528514	1.92966	0.0008	0.00734984	yes
ENSDARG00000019856	atp1a1b	9:36092368-36113016	mut	Mo	OK	5.61833	8.10214	13.7205	0.52816	1.86841	0.00165	0.0131004	yes
ENSDARG00000041217	xpo6	3:14981169-14981638	mut	Mo	OK	9.11425	11.4648	20.5791	0.527709	0.981234	0.00185	0.0144116	yes
ENSDARG00000040156	grm4	6:46980635-47386724	mut	Mo	OK	1.92319	1.00632	2.92951	-0.934409	-2.37067	0.00015	0.00190953	yes
ENSDARG00000053868	etv2	16:42058780-42063826	mut	Mo	OK	28.639	41.2813	69.9203	0.527505	1.98996	0.00065	0.00626337	yes
ENSDARG00000040161	zgc:92287	23:18106225-18131615	mut	Mo	OK	1.39502	3.78221	5.17723	1.43894	1.94837	5e-05	0.000738265	yes
ENSDARG00000059680	fscn1a	3:40434588-40447631	mut	Mo	OK	71.0698	102.353	173.423	0.526239	2.06113	0.00035	0.00382708	yes
ENSDARG00000099366	supt4h1	5:2790581-2797865	mut	Mo	OK	145.004	208.829	353.833	0.52623	1.98491	0.0005	0.00507126	yes
ENSDARG00000043561	psmc1b	20:16822349-16841374	mut	Mo	OK	43.6042	62.7956	106.4	0.526196	2.03774	0.00035	0.00382708	yes
ENSDARG00000040258	si:ch73-340m8.2	17:5672754-5703126	mut	Mo	OK	2.45264	1.14341	3.59605	-1.10099	-2.2533	0.00045	0.00467053	yes
ENSDARG00000030644	gnai3	8:25126324-25201818	mut	Mo	OK	7.22715	10.4045	17.6317	0.525709	1.70141	0.00325	0.0224833	yes
ENSDARG00000015901	ptbp2b	2:20118996-20137444	mut	Mo	OK	30.0735	43.2899	73.3634	0.525535	1.24504	0.00565	0.034124	yes
ENSDARG00000063555	si:ch211-166g5.4	12:3729791-3742083	mut	Mo	OK	5.48977	7.89682	13.3866	0.524526	1.7083	0.00305	0.0213894	yes
ENSDARG00000045847	si:ch211-214j24.10	4:5308912-5316766	mut	Mo	OK	11.8768	17.0752	28.952	0.523764	1.54752	0.00665	0.0387096	yes
ENSDARG00000102753	si:dkey-109l4.3	14:44308051-44312552	mut	Mo	OK	33.0514	47.5174	80.5688	0.523746	2.04511	0.00035	0.00382708	yes
ENSDARG00000056979	lhx9	22:23228024-23238701	mut	Mo	OK	11.0052	15.8181	26.8233	0.523395	1.82821	0.0011	0.00949324	yes
ENSDARG00000040362	ehd2b	18:44656349-44669790	mut	Mo	OK	0.559984	1.32021	1.88019	1.23731	2.60177	0.0001	0.00134605	yes
ENSDARG00000102051	mtbl	7:28877563-28878078	mut	Mo	OK	74.931	107.662	182.593	0.522877	1.71407	0.0027	0.0194132	yes
ENSDARG00000015471	chd1l	6:36866232-36899693	mut	Mo	OK	6.4228	9.21614	15.6389	0.520959	1.92676	0.0008	0.00734984	yes
ENSDARG00000010862	amt	8:26377412-26389700	mut	Mo	OK	10.8423	15.5461	26.3884	0.519884	1.8212	0.00125	0.0105211	yes
ENSDARG00000068894	nrip1b	10:38312797-38372376	mut	Mo	OK	7.35335	10.5407	17.8941	0.519497	1.83972	0.00085	0.00771532	yes
ENSDARG00000040445	PARP14	9:23954717-23968628	mut	Mo	OK	3.88297	5.71751	9.60048	0.558226	1.99574	0.00065	0.00626337	yes
ENSDARG00000105097	Metazoa_SRP	11:11400211-11400509	mut	Mo	OK	4416.73	6329.61	10746.3	0.519138	1.99595	0.00075	0.00701292	yes
ENSDARG00000089967	si:ch211-59o9.10	25:19459676-19476195	mut	Mo	OK	12.5912	18.0443	30.6355	0.519136	1.56257	0.00685	0.0395292	yes
ENSDARG00000020001	rad23aa	1:51477147-51494300	mut	Mo	OK	7.71611	11.0554	18.7715	0.518805	1.65493	0.00385	0.0255548	yes
ENSDARG00000040610	si:ch73-352p4.8	4:5789652-5822952	mut	Mo	OK	1.09836	4.36405	5.46241	1.99031	2.50929	0.00015	0.00190953	yes
ENSDARG00000040623	fosl2	17:41313751-41329686	mut	Mo	OK	3.32836	2.23877	5.56713	-0.572104	-1.91761	0.0012	0.0101792	yes
ENSDARG00000007278	ect2	11:10404944-10472696	mut	Mo	OK	9.42812	13.505	22.9331	0.518451	1.90369	0.001	0.00882317	yes
ENSDARG00000040649	prickle1a	25:291700-325877	mut	Mo	OK	3.199	1.55742	4.75642	-1.03847	-3.27855	5e-05	0.000738265	yes
ENSDARG00000040684	plcd4b	9:38562420-38579069	mut	Mo	OK	2.41291	1.40304	3.81595	-0.782214	-2.05454	0.00065	0.00626337	yes
ENSDARG00000040712	adprh	12:15110314-15157920	mut	Mo	OK	3.41341	1.33863	4.75204	-1.35046	-2.78088	5e-05	0.000738265	yes
ENSDARG00000040727	tfb1m	17:49137150-49197333	mut	Mo	OK	3.30264	5.7065	9.00914	0.788987	1.82755	0.002	0.0153596	yes
ENSDARG00000040732	elavl2	22:38299578-38321088	mut	Mo	OK	0.757444	5.51496	6.2724	2.86414	3.74171	5e-05	0.000738265	yes
ENSDARG00000099664	2015-09-01	2:22697768-22707799	mut	Mo	OK	120.794	172.975	293.769	0.518007	2.02005	0.00035	0.00382708	yes
ENSDARG00000040910	ildr1b	9:34451418-34459881	mut	Mo	OK	3.64508	2.32064	5.96572	-0.651431	-1.90521	0.0011	0.00949324	yes
ENSDARG00000005645	robo3	10:31414254-31619799	mut	Mo	OK	8.30968	11.8988	20.2085	0.517953	1.94707	0.0004	0.00422996	yes
ENSDARG00000041022	pdcd4b	22:29709787-29740786	mut	Mo	OK	3.58822	5.5144	9.10262	0.619936	1.88635	0.0011	0.00949324	yes
ENSDARG00000041041	cxcr3.2	16:11927223-11934401	mut	Mo	OK	1.35615	0.730687	2.08684	-0.892193	-1.63211	0.00755	0.0426058	yes
ENSDARG00000070449	tspan5b	1:11290625-11307910	mut	Mo	OK	4.23609	6.06325	10.2993	0.517358	1.59354	0.00535	0.0328375	yes
ENSDARG00000097258	si:dkey-108k21.25	25:34604167-34604578	mut	Mo	OK	918.65	1313.79	2232.44	0.516147	2.01564	0.0008	0.00734984	yes
ENSDARG00000041071	jagn1a	9:30297894-30300359	mut	Mo	OK	7.4007	2.39296	9.79366	-1.62887	-4.06128	5e-05	0.000738265	yes
ENSDARG00000101947	ptbp2a	24:30898550-30924968	mut	Mo	OK	19.1626	27.3814	46.544	0.514899	1.78247	0.0019	0.0147087	yes
ENSDARG00000070287	zgc:173552	25:35799854-35800265	mut	Mo	OK	309.239	441.793	751.032	0.514647	1.97903	0.00075	0.00701292	yes
ENSDARG00000008247	vezf1a	10:37139888-37183005	mut	Mo	OK	5.00495	7.14692	12.1519	0.513966	1.57058	0.00655	0.0382428	yes
ENSDARG00000026801	stau2	24:12873166-13095638	mut	Mo	OK	15.2695	21.7953	37.0648	0.51336	1.91929	0.00095	0.00847242	yes
ENSDARG00000070286	si:ch211-113a14.19	25:35791636-35792023	mut	Mo	OK	186.548	266.271	452.819	0.513347	1.91634	0.0008	0.00734984	yes
ENSDARG00000041257	smtnl1	14:16802349-16816060	mut	Mo	OK	2.53995	0.486247	3.0262	-2.38504	-3.34343	0.0001	0.00134605	yes
ENSDARG00000062550	rc3h1a	22:15946851-15990001	mut	Mo	OK	4.21892	6.01956	10.2385	0.512784	1.74583	0.00225	0.0168401	yes
ENSDARG00000018743	scamp5a	25:31426266-31452413	mut	Mo	OK	8.33464	11.8915	20.2261	0.512739	1.63424	0.0043	0.0277154	yes
ENSDARG00000041323	csdc2a	12:18977389-18981616	mut	Mo	OK	4.34738	1.69014	6.03752	-1.363	-3.09391	5e-05	0.000738265	yes
ENSDARG00000093612	si:dkey-92i17.2	14:10301431-10311979	mut	Mo	OK	40.3679	57.5909	97.9588	0.512633	1.88942	0.0011	0.00949324	yes
ENSDARG00000041503	med4	9:25509810-25517658	mut	Mo	OK	12.3768	17.655	30.0318	0.512438	1.74113	0.00265	0.0191329	yes
ENSDARG00000060089	btaf1	13:42354791-42410934	mut	Mo	OK	12.6526	18.0476	30.7002	0.512373	1.19736	0.0036	0.0244086	yes
ENSDARG00000026967	ap2s1	15:8791578-8823906	mut	Mo	OK	15.7614	22.4797	38.2411	0.512223	1.92885	0.0006	0.00587614	yes
ENSDARG00000020647	trpc4apb	23:18833198-18851614	mut	Mo	OK	9.16007	13.0467	22.2068	0.510254	1.87886	0.0008	0.00734984	yes
ENSDARG00000074332	SPEN (1 of many)	22:137127-182688	mut	Mo	OK	15.1357	21.5429	36.6786	0.509256	1.54556	0.0052	0.0321556	yes
ENSDARG00000041511	pex10	8:47329337-47339289	mut	Mo	OK	1.74196	3.86885	5.61081	1.15119	2.72418	5e-05	0.000738265	yes
ENSDARG00000041569	ces2	18:17419403-17426543	mut	Mo	OK	6.45673	2.68616	9.14289	-1.26526	-2.65678	5e-05	0.000738265	yes
ENSDARG00000057255	emc1	23:21334748-21350971	mut	Mo	OK	22.4007	31.8595	54.2602	0.508177	1.95151	0.00065	0.00626337	yes
ENSDARG00000041645	A2ML1 (1 of many)	15:21178232-21303684	mut	Mo	OK	3.45125	1.35008	4.80133	-1.35407	-2.61939	5e-05	0.000738265	yes
ENSDARG00000041691	bhlhe41	18:16136785-16141099	mut	Mo	OK	1.2463	0.462974	1.70927	-1.42865	-2.9048	5e-05	0.000738265	yes
ENSDARG00000102953	ints4	18:2991113-3030758	mut	Mo	OK	6.15415	8.7526	14.9067	0.508152	1.85632	0.00145	0.0118317	yes
ENSDARG00000062055	rnf38	1:18170122-18240734	mut	Mo	OK	4.63078	6.58331	11.2141	0.507559	1.67801	0.00305	0.0213894	yes
ENSDARG00000041729	sntb1	16:15274862-15372979	mut	Mo	OK	3.52817	5.43774	8.96591	0.624088	1.82111	0.00235	0.0174606	yes
ENSDARG00000041750	ccdc92	8:43089374-43151699	mut	Mo	OK	1.21835	0.640083	1.85843	-0.9286	-1.67492	0.0062	0.0366055	yes
ENSDARG00000088899	ralgapb	6:58287778-58403212	mut	Mo	OK	4.43477	6.30039	10.7352	0.506583	1.75836	0.0024	0.0177259	yes
ENSDARG00000041797	cx28.9	20:40847643-40853843	mut	Mo	OK	0.516983	0.988652	1.50563	0.935345	1.72153	0.0043	0.0277154	yes
ENSDARG00000007405	strap	4:16887854-16894075	mut	Mo	OK	56.215	79.8632	136.078	0.506576	1.98073	0.0004	0.00422996	yes
ENSDARG00000041864	capn3a	17:45191717-45363385	mut	Mo	OK	0.443485	1.18332	1.62681	1.41589	1.39752	0.00185	0.0144116	yes
ENSDARG00000075616	polr2k	19:12058680-12062120	mut	Mo	OK	108.283	153.784	262.067	0.506101	1.78418	0.00165	0.0131004	yes
ENSDARG00000023815	uvrag	10:32320996-32550444	mut	Mo	OK	6.53467	9.28016	15.8148	0.506035	1.55093	0.007	0.0401546	yes
ENSDARG00000060785	pcnxl4	13:31390086-31405058	mut	Mo	OK	4.30079	6.10676	10.4076	0.505804	1.62403	0.00525	0.032361	yes
ENSDARG00000041952	prox2	17:52407198-52434702	mut	Mo	OK	2.62379	1.53448	4.15827	-0.773905	-1.98281	0.0007	0.00664197	yes
ENSDARG00000041980	fam26f	16:32272633-32279433	mut	Mo	OK	2.33946	0.712595	3.05205	-1.71502	-3.04257	5e-05	0.000738265	yes
ENSDARG00000042010	PKLR	16:54629440-54634651	mut	Mo	OK	2.14509	0.639374	2.78446	-1.74631	-3.11656	5e-05	0.000738265	yes
ENSDARG00000042018	fhl2a	9:6600594-6624003	mut	Mo	OK	4.11165	0.452782	4.56443	-3.18283	-3.79926	5e-05	0.000738265	yes
ENSDARG00000078929	abhd16a	16:10586630-10626068	mut	Mo	OK	13.3999	19.0262	32.4261	0.505761	1.86317	0.00165	0.0131004	yes
ENSDARG00000105507	si:ch1073-159d7.13	7:6329650-6330302	mut	Mo	OK	126.984	180.249	307.233	0.505345	1.73064	0.0038	0.0253294	yes
ENSDARG00000058354	selt1a	2:9886484-9898503	mut	Mo	OK	26.0462	36.9698	63.016	0.505274	1.87425	0.001	0.00882317	yes
ENSDARG00000042112	dio1	8:18003857-18006377	mut	Mo	OK	0.375845	0.907553	1.2834	1.27184	1.71571	0.00845	0.0462566	yes
ENSDARG00000042186	paplnb	20:33596498-33609564	mut	Mo	OK	1.03715	0.149948	1.1871	-2.79009	-1.70389	0.00135	0.0111892	yes
ENSDARG00000042210	sema3ab	18:9354097-9470930	mut	Mo	OK	3.42266	6.05262	9.47528	0.82244	2.59349	5e-05	0.000738265	yes
ENSDARG00000042215	pias4b	2:57312950-57339837	mut	Mo	OK	0.23641	0.792736	1.02915	1.74555	1.31241	0.0043	0.0277154	yes
ENSDARG00000095340	si:ch211-113a14.8	25:35762739-35763150	mut	Mo	OK	600.227	851.799	1452.03	0.505004	1.974	0.00035	0.00382708	yes
ENSDARG00000025797	abhd2a	7:13573154-13611473	mut	Mo	OK	4.79386	6.80287	11.5967	0.504957	1.51279	0.0085	0.046384	yes
ENSDARG00000042322	si:dkey-177p2.6	20:27048709-27063751	mut	Mo	OK	3.95755	5.93257	9.89012	0.58405	2.06819	0.0005	0.00507126	yes
ENSDARG00000019715	metap1d	1:30142299-30170234	mut	Mo	OK	8.42241	11.9514	20.3738	0.504877	1.49458	0.00885	0.0477389	yes
ENSDARG00000039601	ier3ip1	10:14584651-14587495	mut	Mo	OK	36.2912	51.4892	87.7804	0.504649	1.82171	0.0018	0.0140726	yes
ENSDARG00000069422	nhp2	21:30365088-30372509	mut	Mo	OK	163.404	231.829	395.233	0.504617	1.95808	0.0005	0.00507126	yes
ENSDARG00000079473	si:ch211-120p12.3	13:23504366-23535130	mut	Mo	OK	8.02617	11.3866	19.4128	0.504549	1.83643	0.00145	0.0118317	yes
ENSDARG00000062646	tet3	5:13809698-13826742	mut	Mo	OK	14.3146	20.3018	34.6164	0.504122	1.91543	0.00075	0.00701292	yes
ENSDARG00000042535	actc1a	20:29574264-29580635	mut	Mo	OK	1.61131	0.401535	2.01284	-2.00464	-2.66345	0.00065	0.00626337	yes
ENSDARG00000042545	sema3ga	8:25631089-25678140	mut	Mo	OK	4.02632	0.838304	4.86462	-2.26392	-3.51361	5e-05	0.000738265	yes
ENSDARG00000042557	rnf144ab	20:29931408-29961707	mut	Mo	OK	2.68187	4.4796	7.16147	0.740129	2.08198	0.0002	0.00244048	yes
ENSDARG00000040990	usp37	9:715589-746553	mut	Mo	OK	9.73072	13.7973	23.528	0.503766	1.87745	0.00095	0.00847242	yes
ENSDARG00000101180	mcm7	14:40036-215580	mut	Mo	OK	157.345	223.079	380.424	0.503629	1.59336	0.00465	0.0294037	yes
ENSDARG00000023999	heatr5a	17:28607395-28652951	mut	Mo	OK	7.77008	11.0105	18.7806	0.502875	1.50707	0.00865	0.0469664	yes
ENSDARG00000052154	lix1	5:64133317-64150043	mut	Mo	OK	27.8135	39.3548	67.1683	0.500757	1.79032	0.0016	0.0128266	yes
ENSDARG00000042698	si:dkey-15j16.6	20:23948279-23953074	mut	Mo	OK	1.17912	0.0456641	1.22478	-4.6905	-2.28949	0.00265	0.0191329	yes
ENSDARG00000012674	rpusd4	11:17830053-17860142	mut	Mo	OK	9.86108	13.9517	23.8128	0.500629	1.69531	0.0024	0.0177259	yes
ENSDARG00000035532	zgc:110329	5:27534534-27549614	mut	Mo	OK	14.2043	20.0918	34.2961	0.500281	1.83197	0.0017	0.0134115	yes
ENSDARG00000075612	ercc6	13:30743720-30779522	mut	Mo	OK	9.92175	14.0194	23.9412	0.498756	1.91669	0.00095	0.00847242	yes
ENSDARG00000060695	znf346	21:37405592-37423314	mut	Mo	OK	43.5467	61.5157	105.062	0.498392	1.91453	0.00065	0.00626337	yes
ENSDARG00000102831	fam193b	14:44800141-44844177	mut	Mo	OK	6.50518	9.18145	15.6866	0.497133	1.76734	0.0023	0.0171404	yes
ENSDARG00000039547	si:ch211-113a14.22	25:35797406-35797781	mut	Mo	OK	269.286	379.95	649.236	0.496668	1.87339	0.00115	0.00982707	yes
ENSDARG00000016548	eif5b	1:45233553-45264031	mut	Mo	OK	11.0148	15.5369	26.5517	0.496263	1.87566	0.00105	0.00918036	yes
ENSDARG00000015392	dhx15	7:71039569-71092635	mut	Mo	OK	84.103	118.609	202.712	0.49598	1.84075	0.00095	0.00847242	yes
ENSDARG00000063446	iba57	2:3585503-3588711	mut	Mo	OK	7.81701	11.0189	18.8359	0.495288	1.56675	0.0077	0.0432136	yes
ENSDARG00000095906	si:dkey-235h8.1	16:29277797-29292379	mut	Mo	OK	15.749	22.1824	37.9314	0.494154	1.86469	0.0009	0.0081056	yes
ENSDARG00000042829	si:dkey-30j22.1	20:35665672-35803500	mut	Mo	OK	1.36949	0.74316	2.11265	-0.881894	-3.09225	5e-05	0.000738265	yes
ENSDARG00000060308	urb1	15:5644532-5732815	mut	Mo	OK	14.8823	20.9548	35.8371	0.49368	1.94279	0.0009	0.0081056	yes
ENSDARG00000023967	atp6v1c1a	16:52862519-52881848	mut	Mo	OK	24.7313	34.8163	59.5476	0.493426	1.84464	0.00105	0.00918036	yes
ENSDARG00000058094	ciarta	19:9009508-9021143	mut	Mo	OK	12.4712	17.5385	30.0097	0.491921	1.83572	0.001	0.00882317	yes
ENSDARG00000042861	ltk	17:31383620-31466506	mut	Mo	OK	1.03296	0.485178	1.51814	-1.09019	-2.51706	0.00015	0.00190953	yes
ENSDARG00000059360	srsf3b	22:575529-585244	mut	Mo	OK	113.544	159.653	273.197	0.491689	1.90647	0.00085	0.00771532	yes
ENSDARG00000005980	sfswap	21:15029519-15186475	mut	Mo	OK	15.9212	22.3818	38.303	0.491376	1.71236	0.0033	0.0227386	yes
ENSDARG00000078352	lyrm4	2:21322099-21323845	mut	Mo	OK	35.0025	49.1744	84.1769	0.49045	1.61487	0.00575	0.0345597	yes
ENSDARG00000004460	desi2	13:11417978-11438093	mut	Mo	OK	7.00772	9.8396	16.8473	0.489655	1.55983	0.0061	0.0361626	yes
ENSDARG00000042948	dnajc5aa	8:23144509-23158610	mut	Mo	OK	2.23893	3.79886	6.03779	0.762758	1.63112	0.0064	0.0375311	yes
ENSDARG00000031720	clstn1	23:29654019-29741189	mut	Mo	OK	13.6631	19.1845	32.8476	0.489655	1.78002	0.00155	0.0125124	yes
ENSDARG00000029075	pfkfb4b	6:39996068-40031887	mut	Mo	OK	38.3849	53.8948	92.2797	0.489607	1.58155	0.0043	0.0277154	yes
ENSDARG00000037935	aldh16a1	3:31948688-31966801	mut	Mo	OK	4.18181	5.87152	10.0533	0.489605	1.61128	0.0056	0.0339164	yes
ENSDARG00000040853	shoc2	22:29647450-29690986	mut	Mo	OK	10.4585	14.6792	25.1377	0.489098	1.74604	0.0026	0.0188503	yes
ENSDARG00000043179	bag4	8:44605498-44617451	mut	Mo	OK	2.30735	3.77398	6.08133	0.709853	1.89156	0.0012	0.0101792	yes
ENSDARG00000077002	igsf3	9:20265686-20562108	mut	Mo	OK	4.70924	6.60937	11.3186	0.489017	1.69321	0.0031	0.0216963	yes
ENSDARG00000037363	st5	7:28193600-28278342	mut	Mo	OK	13.5883	19.0694	32.6577	0.488894	1.70592	0.00155	0.0125124	yes
ENSDARG00000043236	ccna1	10:34964475-34972124	mut	Mo	OK	0.72707	1.81722	2.54429	1.32156	2.01847	0.00095	0.00847242	yes
ENSDARG00000043238	atg16l2	15:5483540-5575763	mut	Mo	OK	1.47253	0.587726	2.06026	-1.32508	-1.87637	0.0008	0.00734984	yes
ENSDARG00000009764	srek1	5:54537403-54578336	mut	Mo	OK	10.1828	14.2886	24.4714	0.488727	1.71731	0.00295	0.0208906	yes
ENSDARG00000043328	fip1l1a	20:22766859-22899121	mut	Mo	OK	1.34012	3.46294	4.80306	1.36964	2.35993	5e-05	0.000738265	yes
ENSDARG00000099749	ube2d2l	14:50663182-50694896	mut	Mo	OK	19.8437	27.8387	47.6824	0.488407	1.79893	0.0023	0.0171404	yes
ENSDARG00000089836	MRPS12	21:25524678-25528787	mut	Mo	OK	20.5608	28.8442	49.405	0.488386	1.62036	0.0048	0.0302092	yes
ENSDARG00000075400	FBXO33	17:12878074-12884883	mut	Mo	OK	6.72375	9.43243	16.1562	0.488363	1.60015	0.0066	0.0384959	yes
ENSDARG00000043480	rbbp8	24:36315955-36335871	mut	Mo	OK	0.706534	3.97495	4.68148	2.49211	3.63236	5e-05	0.000738265	yes
ENSDARG00000004189	cbx1a	3:23804333-23941034	mut	Mo	OK	52.0663	73.0358	125.102	0.488255	1.86072	0.00085	0.00771532	yes
ENSDARG00000092610	lamp1	9:34571113-34580690	mut	Mo	OK	7.57526	10.6233	18.1986	0.487859	1.70253	0.00285	0.02029	yes
ENSDARG00000043514	si:dkey-239i20.4	20:15215448-15232648	mut	Mo	OK	0.808558	0.417306	1.22586	-0.954245	-1.7147	0.0037	0.0248826	yes
ENSDARG00000012314	usp25	10:38226703-38299877	mut	Mo	OK	6.05492	8.48545	14.5404	0.486882	1.74129	0.00215	0.0162528	yes
ENSDARG00000045167	dlgap5	12:17498192-17533809	mut	Mo	OK	35.1604	49.2587	84.4191	0.486429	1.7483	0.002	0.0153596	yes
ENSDARG00000041776	ndst3	1:19453642-19580290	mut	Mo	OK	7.00818	9.81389	16.8221	0.485786	1.7538	0.00205	0.0156467	yes
ENSDARG00000043697	nefmb	8:6819913-6823342	mut	Mo	OK	1.22567	0.237891	1.46356	-2.36519	-3.4484	5e-05	0.000738265	yes
ENSDARG00000100825	calm3a	15:9257980-9296257	mut	Mo	OK	9.99585	13.9952	23.9911	0.485533	1.72471	0.00315	0.0219753	yes
ENSDARG00000079687	rnf10	8:41252760-41266135	mut	Mo	OK	86.9138	121.646	208.56	0.485033	1.77293	0.002	0.0153596	yes
ENSDARG00000073848	arhgef7b	1:45267089-45329148	mut	Mo	OK	8.47486	11.8598	20.3347	0.484813	1.77272	0.0024	0.0177259	yes
ENSDARG00000102033	zgc:193790	21:2310464-2316113	mut	Mo	OK	9.51702	13.3143	22.8313	0.484395	1.50367	0.0091	0.0487241	yes
ENSDARG00000034309	cox10	12:36716740-36785783	mut	Mo	OK	17.5256	24.5114	42.037	0.483991	1.82867	0.00165	0.0131004	yes
ENSDARG00000043864	nptnb	18:1253194-1305037	mut	Mo	OK	0.964588	0.272798	1.23739	-1.82208	-2.21585	0.0003	0.00340471	yes
ENSDARG00000008805	orc3	17:49230528-49256706	mut	Mo	OK	46.6292	65.2081	111.837	0.483817	1.82007	0.00115	0.00982707	yes
ENSDARG00000043932	stmn4l	17:12544465-12554996	mut	Mo	OK	3.61049	1.47741	5.0879	-1.28913	-2.4458	0.0003	0.00340471	yes
ENSDARG00000061110	zbtb44	5:29530933-29551128	mut	Mo	OK	4.59732	6.42532	11.0226	0.482977	1.49027	0.00885	0.0477389	yes
ENSDARG00000044010	loxl2a	10:20448330-20490054	mut	Mo	OK	1.71837	6.42682	8.14519	1.90306	5.53313	5e-05	0.000738265	yes
ENSDARG00000044011	xkrx	14:40951157-40973606	mut	Mo	OK	3.56629	5.61185	9.17814	0.654053	2.07751	0.00045	0.00467053	yes
ENSDARG00000061994	acacb	5:18827486-18879894	mut	Mo	OK	9.87531	13.8	23.6753	0.482769	1.87655	0.0012	0.0101792	yes
ENSDARG00000018000	ubp1	19:43237374-43272452	mut	Mo	OK	8.40586	11.7456	20.1515	0.482651	1.68876	0.00385	0.0255548	yes
ENSDARG00000099274	atxn3	17:53196947-53203152	mut	Mo	OK	8.8212	12.3234	21.1446	0.482354	1.52159	0.008	0.0444234	yes
ENSDARG00000032261	rngtt	20:923052-1099230	mut	Mo	OK	17.3367	24.2191	41.5558	0.482316	1.83889	0.00155	0.0125124	yes
ENSDARG00000010238	rbm22	21:33155263-33196792	mut	Mo	OK	18.9626	26.4733	45.4359	0.481385	1.84613	0.0008	0.00734984	yes
ENSDARG00000060069	isoc1	10:16589139-16605834	mut	Mo	OK	4.54535	6.34254	10.8879	0.480671	1.53622	0.0078	0.0436901	yes
ENSDARG00000031776	zgc:92066	3:31967792-31969285	mut	Mo	OK	428.05	597.279	1025.33	0.480626	1.84108	0.00075	0.00701292	yes
ENSDARG00000013892	sorl1	15:21605277-21733886	mut	Mo	OK	5.14081	7.17141	12.3122	0.480261	1.82125	0.0015	0.0121938	yes
ENSDARG00000044355	CT030712.1	9:24897578-24899212	mut	Mo	OK	1.71993	2.83641	4.55634	0.72172	1.69147	0.0037	0.0248826	yes
ENSDARG00000044375	zgc:158291	21:38264842-38267535	mut	Mo	OK	1.24193	0.455355	1.69728	-1.44752	-2.58423	0.00015	0.00190953	yes
ENSDARG00000044381	siah2l	21:38611595-38670148	mut	Mo	OK	2.56891	5.59756	8.16647	1.12364	3.11448	5e-05	0.000738265	yes
ENSDARG00000044406	lurap1	6:30643078-30671841	mut	Mo	OK	1.32472	0.595478	1.9202	-1.15356	-1.8999	0.00205	0.0156467	yes
ENSDARG00000089791	slc25a32a	19:13017537-13048458	mut	Mo	OK	7.45799	10.4031	17.8611	0.480153	1.58307	0.0032	0.0221904	yes
ENSDARG00000044541	ppp1r14ba	21:26959580-26974142	mut	Mo	OK	5.4052	3.32286	8.72806	-0.701922	-1.62918	0.006	0.0356672	yes
ENSDARG00000014506	tmem126a	10:29383449-29386082	mut	Mo	OK	23.0049	32.0767	55.0816	0.479582	1.6172	0.0056	0.0339164	yes
ENSDARG00000017676	mmp2	7:35138572-35161424	mut	Mo	OK	31.0139	43.2396	74.2535	0.479436	1.8817	0.001	0.00882317	yes
ENSDARG00000044642	sc5d	21:24495073-24498905	mut	Mo	OK	4.16655	2.62443	6.79098	-0.666849	-1.61153	0.00625	0.0368256	yes
ENSDARG00000041607	eif4ebp3l	14:6666140-6680922	mut	Mo	OK	40.9153	57.044	97.9593	0.479434	1.81333	0.0014	0.0115375	yes
ENSDARG00000044685	nr0b2a	16:55167504-55172525	mut	Mo	OK	2.54375	0.883477	3.42723	-1.5257	-3.77026	5e-05	0.000738265	yes
ENSDARG00000052846	fsta	5:39904756-39910262	mut	Mo	OK	53.9161	75.1577	129.074	0.479204	1.68314	0.00335	0.0230283	yes
ENSDARG00000100657	egfl7	21:7666974-7703748	mut	Mo	OK	10	13.9398	23.9398	0.479202	1.56467	0.00785	0.0438993	yes
ENSDARG00000044803	dhrs3b	11:28343558-28367434	mut	Mo	OK	2.02974	0.909915	2.93966	-1.15749	-1.63182	0.0068	0.0393191	yes
ENSDARG00000070161	vamp3	11:39664682-39690467	mut	Mo	OK	39.3777	54.8784	94.2561	0.478859	1.60738	0.00475	0.0299488	yes
ENSDARG00000045014	tuba2	11:3268363-3275303	mut	Mo	OK	3.35064	1.37734	4.72798	-1.28255	-2.85251	5e-05	0.000738265	yes
ENSDARG00000074554	tspan31	23:36608251-36627840	mut	Mo	OK	25.9077	36.0975	62.0052	0.47852	1.82605	0.00165	0.0131004	yes
ENSDARG00000010250	nqo1	7:56401842-56420909	mut	Mo	OK	9.782	13.629	23.411	0.47848	1.51762	0.0082	0.0452159	yes
ENSDARG00000020986	ctu1	8:3364402-3380735	mut	Mo	OK	8.7958	12.2529	21.0487	0.478237	1.58165	0.00625	0.0368256	yes
ENSDARG00000045153	slc16a8	12:19069912-19076897	mut	Mo	OK	1.04693	4.66041	5.70734	2.1543	4.93595	5e-05	0.000738265	yes
ENSDARG00000010770	sox19a	5:23695379-23697637	mut	Mo	OK	238.995	332.924	571.919	0.478212	1.82733	0.00145	0.0118317	yes
ENSDARG00000101127	map1lc3b	25:12397573-12409522	mut	Mo	OK	52.7977	73.5335	126.331	0.477927	1.87643	0.00065	0.00626337	yes
ENSDARG00000045199	CAPN1 (1 of many)	7:6548424-6618314	mut	Mo	OK	1.11222	2.28391	3.39613	1.03807	2.59932	5e-05	0.000738265	yes
ENSDARG00000061370	tsen34	18:41552349-41557126	mut	Mo	OK	9.60581	13.3664	22.9722	0.476633	1.55596	0.0072	0.0409904	yes
ENSDARG00000009922	dmbx1a	2:10387509-10394667	mut	Mo	OK	11.4556	15.9401	27.3957	0.476605	1.73982	0.00235	0.0174606	yes
ENSDARG00000053087	mthfr	8:47228640-47262086	mut	Mo	OK	7.43904	10.3416	17.7806	0.475267	1.56745	0.0064	0.0375311	yes
ENSDARG00000045316	map7d2b	24:23975597-24018027	mut	Mo	OK	3.73789	1.88817	5.62606	-0.985234	-2.46121	5e-05	0.000738265	yes
ENSDARG00000101584	si:ch211-132d3.4	7:14108458-14135906	mut	Mo	OK	95.4688	132.68	228.149	0.474848	1.8662	0.0014	0.0115375	yes
ENSDARG00000071468	mrpl54	22:15693076-15694077	mut	Mo	OK	35.5851	49.4352	85.0203	0.474265	1.66004	0.0046	0.0291725	yes
ENSDARG00000018574	sf3b4	19:7505421-7511933	mut	Mo	OK	8.31577	11.5486	19.8644	0.473798	1.52504	0.00885	0.0477389	yes
ENSDARG00000070913	sox2	22:37412521-37591549	mut	Mo	OK	28.8337	40.0424	68.8761	0.473776	1.78045	0.00135	0.0111892	yes
ENSDARG00000098595	zgc:195633	7:6309626-6310355	mut	Mo	OK	463.446	643.367	1106.81	0.47324	1.6351	0.0044	0.0282341	yes
ENSDARG00000045513	taf3	4:25095029-25179260	mut	Mo	OK	3.26734	5.10424	8.37158	0.643582	2.07982	0.0002	0.00244048	yes
ENSDARG00000045516	itih2	4:25192373-25226770	mut	Mo	OK	7.61706	2.28627	9.90333	-1.73624	-2.98822	5e-05	0.000738265	yes
ENSDARG00000040266	sox19b	7:26223389-26226754	mut	Mo	OK	71.1834	98.8177	170.001	0.473229	1.86139	0.0013	0.0108473	yes
ENSDARG00000045636	rbl2	25:35506530-35539644	mut	Mo	OK	0.551473	2.99716	3.54863	2.44223	7.09338	5e-05	0.000738265	yes
ENSDARG00000045639	elavl4	8:15968441-16080266	mut	Mo	OK	4.56954	2.69798	7.26752	-0.760172	-1.74733	0.0036	0.0244086	yes
ENSDARG00000045687	pdzrn4	4:13811961-13862596	mut	Mo	OK	1.24655	0.725832	1.97238	-0.780229	-1.63599	0.00645	0.0377733	yes
ENSDARG00000098481	zgc:110283	5:64308736-64315588	mut	Mo	OK	15.5621	21.6017	37.1638	0.473106	1.52129	0.0079	0.0440371	yes
ENSDARG00000009170	ctr9	7:66432052-66470079	mut	Mo	OK	27.7039	38.4489	66.1528	0.472856	1.86094	0.0008	0.00734984	yes
ENSDARG00000105359	si:ch1073-159d7.4	7:6331232-6331693	mut	Mo	OK	1061.14	1472.23	2533.37	0.472385	1.84657	0.0011	0.00949324	yes
ENSDARG00000045803	mfge8b	25:19051374-19095449	mut	Mo	OK	1.38932	2.41759	3.80691	0.79919	2.42029	0.0001	0.00134605	yes
ENSDARG00000042344	trmt6	20:45850602-45868586	mut	Mo	OK	16.9234	23.4722	40.3956	0.471933	1.7343	0.00235	0.0174606	yes
ENSDARG00000055620	acad9	11:26448365-26463995	mut	Mo	OK	6.30277	8.74125	15.044	0.471854	1.59084	0.00525	0.032361	yes
ENSDARG00000077530	ahctf1	17:12067405-12095924	mut	Mo	OK	33.6593	46.6489	80.3082	0.470838	1.83366	0.00145	0.0118317	yes
ENSDARG00000001162	matr3l1.1	14:24766072-24781335	mut	Mo	OK	16.2861	22.569	38.8551	0.470703	1.74857	0.0028	0.0199914	yes
ENSDARG00000099139	fbxw5	5:53811287-53835099	mut	Mo	OK	11.2817	15.6283	26.91	0.470178	1.80036	0.0017	0.0134115	yes
ENSDARG00000070538	hey1	19:32210253-32214983	mut	Mo	OK	6.41785	8.88912	15.307	0.469951	1.67758	0.00465	0.0294037	yes
ENSDARG00000037813	zgc:113278	23:4287439-4304652	mut	Mo	OK	10.1572	14.0627	24.2199	0.46937	1.60168	0.0055	0.033533	yes
ENSDARG00000038967	cul3a	2:47789876-47827290	mut	Mo	OK	11.9699	16.5705	28.5404	0.469207	1.738	0.003	0.0211412	yes
ENSDARG00000045945	syn2a	23:4816373-4839861	mut	Mo	OK	2.33139	1.23285	3.56424	-0.919195	-2.18793	0.00035	0.00382708	yes
ENSDARG00000088999	METTL4	7:71335009-71343798	mut	Mo	OK	5.61236	7.76641	13.3788	0.46864	1.63868	0.0047	0.0296767	yes
ENSDARG00000069328	si:dkey-12e7.1	18:21112768-21116902	mut	Mo	OK	5.76143	7.96979	13.7312	0.468115	1.52545	0.00895	0.0481288	yes
ENSDARG00000094992	otx1b	17:24300351-24306014	mut	Mo	OK	19.8158	27.3824	47.1982	0.466596	1.78418	0.00245	0.0180491	yes
ENSDARG00000045959	csf3r	16:3207374-3230290	mut	Mo	OK	1.85643	0.63964	2.49607	-1.5372	-3.21649	5e-05	0.000738265	yes
ENSDARG00000046012	slc47a1	21:39917630-39950359	mut	Mo	OK	6.09795	2.80289	8.90084	-1.12141	-2.50059	0.00015	0.00190953	yes
ENSDARG00000046019	snai1b	23:2567004-2573963	mut	Mo	OK	1.69487	2.95166	4.64653	0.800347	1.5472	0.007	0.0401546	yes
ENSDARG00000012244	ube2e3	9:43996114-44078539	mut	Mo	OK	22.527	31.1282	53.6552	0.466565	1.57	0.0067	0.0388833	yes
ENSDARG00000101891	arid1ab	19:14490136-14573059	mut	Mo	OK	10.5814	14.6182	25.1996	0.46623	1.76033	0.0024	0.0177259	yes
ENSDARG00000102587	mios	16:47345187-47366438	mut	Mo	OK	23.668	32.6932	56.3612	0.466057	1.78435	0.0018	0.0140726	yes
ENSDARG00000074807	tbrg4	16:27725382-27743307	mut	Mo	OK	15.8421	21.8776	37.7197	0.465696	1.75285	0.0022	0.0165586	yes
ENSDARG00000042799	atpaf1	22:17166496-17175590	mut	Mo	OK	19.7033	27.2092	46.9125	0.465655	1.74301	0.00235	0.0174606	yes
ENSDARG00000038900	acadm	2:26814435-26820516	mut	Mo	OK	43.5972	60.1711	103.768	0.464836	1.75885	0.0016	0.0128266	yes
ENSDARG00000098984	pid1	18:46636359-46686334	mut	Mo	OK	6.23365	8.60162	14.8353	0.464532	1.51804	0.00925	0.0493295	yes
ENSDARG00000015921	pwp1	4:1977698-1989879	mut	Mo	OK	25.3341	34.9495	60.2836	0.464192	1.77218	0.0019	0.0147087	yes
ENSDARG00000042827	adoa	12:8437024-8438670	mut	Mo	OK	8.71391	12.0147	20.7286	0.463413	1.54234	0.007	0.0401546	yes
ENSDARG00000002754	pdcd2l	25:29999331-30011715	mut	Mo	OK	15.0932	20.8075	35.9007	0.463207	1.5841	0.0057	0.0343543	yes
ENSDARG00000042670	eps15l1a	22:15881192-15930782	mut	Mo	OK	8.30022	11.4413	19.7415	0.463024	1.7174	0.00255	0.0186199	yes
ENSDARG00000079626	elf2b	1:13270706-13302979	mut	Mo	OK	14.3061	19.7182	34.0243	0.462904	1.71438	0.00275	0.0196911	yes
ENSDARG00000091011	si:ch211-113a14.9	25:35765407-35765719	mut	Mo	OK	701.337	965.509	1666.85	0.461181	1.77862	0.00195	0.0150354	yes
ENSDARG00000033840	fat3a	15:40707913-41032535	mut	Mo	OK	9.71063	13.3568	23.0674	0.459941	1.7926	0.00205	0.0156467	yes
ENSDARG00000074688	fbrs	12:26943399-26969976	mut	Mo	OK	7.11195	9.78002	16.892	0.459593	1.35305	0.00565	0.034124	yes
ENSDARG00000074453	zfx	24:16861227-16877034	mut	Mo	OK	19.4853	26.7933	46.2786	0.459489	1.49954	0.00345	0.0235757	yes
ENSDARG00000051962	mmp15a	25:17462998-17483301	mut	Mo	OK	3.54244	4.92757	8.47001	0.476133	1.51894	0.00935	0.0497711	yes
ENSDARG00000070282	zgc:173552	25:35793155-35793566	mut	Mo	OK	584.367	803.523	1387.89	0.459466	1.79825	0.0016	0.0128266	yes
ENSDARG00000040407	usp22	12:1464322-1497733	mut	Mo	OK	6.05211	8.32023	14.3723	0.459186	1.6402	0.00435	0.0279753	yes
ENSDARG00000052037	trim35-1	1:57303868-57313833	mut	Mo	OK	1.03118	0	1.03118	#NAME?	#NAME?	5e-05	0.000738265	yes
ENSDARG00000052039	caspb	1:57315222-57329056	mut	Mo	OK	4.68993	0.564072	5.254	-3.05561	-5.68164	5e-05	0.000738265	yes
ENSDARG00000008976	mdn1	20:23978198-24047196	mut	Mo	OK	9.67344	13.288	22.9614	0.45802	1.77748	0.0023	0.0171404	yes
ENSDARG00000041870	ift172	20:38934358-38997541	mut	Mo	OK	8.44873	11.6021	20.0508	0.457579	1.75244	0.00225	0.0168401	yes
ENSDARG00000052089	CCKAR	7:61918742-61934582	mut	Mo	OK	2.68116	1.63824	4.3194	-0.710707	-1.55033	0.007	0.0401546	yes
ENSDARG00000052109	zgc:114041	5:65453274-65467687	mut	Mo	OK	0.442457	1.07377	1.51623	1.27908	1.91624	0.00395	0.0260394	yes
ENSDARG00000052129	boka	6:27069067-27098131	mut	Mo	OK	4.45593	3.03869	7.49462	-0.55228	-1.66044	0.0045	0.0287272	yes
ENSDARG00000105398	dnajc14	11:2531257-2540470	mut	Mo	OK	8.33287	11.4357	19.7686	0.456658	1.62206	0.0045	0.0287272	yes
ENSDARG00000007693	nfkbiab	17:12788567-12792670	mut	Mo	OK	30.0131	41.1776	71.1907	0.456268	1.70366	0.00355	0.0241639	yes
ENSDARG00000100559	tor2a	5:64423483-64432750	mut	Mo	OK	7.22132	9.90536	17.1267	0.455947	1.50557	0.00835	0.0458247	yes
ENSDARG00000006196	sav1	13:36661244-36672372	mut	Mo	OK	5.62858	7.72023	13.3488	0.455873	1.51526	0.0086	0.046812	yes
ENSDARG00000052165	si:ch211-236k19.2	5:64212465-64219592	mut	Mo	OK	1.35295	4.16288	5.51583	1.62148	2.61482	0.0001	0.00134605	yes
ENSDARG00000052139	notch3	3:53275050-53304745	mut	Mo	OK	37.272	51.1143	88.3863	0.455634	1.7666	0.00235	0.0174606	yes
ENSDARG00000052336	ociad2	20:23336352-23345740	mut	Mo	OK	1.161	0.540717	1.70172	-1.10242	-1.68141	0.00705	0.0402817	yes
ENSDARG00000052417	NATD1 (1 of many)	3:58165893-58170734	mut	Mo	OK	1.27472	4.96009	6.23481	1.96019	3.80482	5e-05	0.000738265	yes
ENSDARG00000052426	si:ch211-256e16.3	3:58062702-58083965	mut	Mo	OK	0.591926	1.23669	1.82862	1.06299	2.16873	0.0008	0.00734984	yes
ENSDARG00000074070	irx5b	25:35602495-35607765	mut	Mo	OK	4.76042	6.52593	11.2863	0.455095	1.55232	0.0068	0.0393191	yes
ENSDARG00000052465	dusp10	20:52105401-52133916	mut	Mo	OK	0.856258	2.52638	3.38264	1.56095	1.92474	0.0018	0.0140726	yes
ENSDARG00000000370	triob	16:8853369-9108908	mut	Mo	OK	14.587	19.987	34.574	0.454378	1.50297	0.0087	0.0471494	yes
ENSDARG00000052654	thrab	12:21677910-21918131	mut	Mo	OK	1.58544	2.8906	4.47604	0.866482	2.07968	0.00075	0.00701292	yes
ENSDARG00000052688	paqr5b	7:33185997-33341066	mut	Mo	OK	3.29738	1.05906	4.35644	-1.63854	-3.29592	5e-05	0.000738265	yes
ENSDARG00000088346	miip	11:40240895-40255741	mut	Mo	OK	8.91561	12.2159	21.1315	0.454359	1.58891	0.0052	0.0321556	yes
ENSDARG00000070721	vdrb	6:38957196-39008913	mut	Mo	OK	13.5742	18.5925	32.1667	0.453858	1.55129	0.0058	0.034764	yes
ENSDARG00000052741	card11	3:41416823-41490201	mut	Mo	OK	1.29889	2.94078	4.23967	1.17892	3.37104	5e-05	0.000738265	yes
ENSDARG00000052748	capn1b	22:26278243-26303997	mut	Mo	OK	3.88364	2.04441	5.92805	-0.925726	-2.67749	5e-05	0.000738265	yes
ENSDARG00000052783	cdc42ep3	13:41967910-42180452	mut	Mo	OK	5.36584	2.71795	8.08379	-0.981287	-2.69872	5e-05	0.000738265	yes
ENSDARG00000062986	pnpla7a	21:13517510-13565556	mut	Mo	OK	9.95444	13.619	23.5734	0.452213	1.5483	0.00595	0.035455	yes
ENSDARG00000104069	rnf170	5:337214-342318	mut	Mo	OK	14.3333	19.6005	33.9338	0.45152	1.6429	0.00385	0.0255548	yes
ENSDARG00000074137	c2cd3	15:15322735-15367380	mut	Mo	OK	5.10498	6.9776	12.0826	0.450826	1.67068	0.00325	0.0224833	yes
ENSDARG00000070164	ubr2	13:3130120-3191423	mut	Mo	OK	10.0632	13.7518	23.815	0.450532	1.74049	0.0025	0.0183242	yes
ENSDARG00000052897	atxn2	5:41045325-41109081	mut	Mo	OK	1.08312	1.95357	3.03669	0.850925	2.33548	5e-05	0.000738265	yes
ENSDARG00000052903	rtkn2b	21:11163796-11193855	mut	Mo	OK	1.79927	3.59139	5.39066	0.997127	2.02061	0.00075	0.00701292	yes
ENSDARG00000055100	cxcl12b	22:27067101-27083041	mut	Mo	OK	15.356	20.9805	36.3365	0.45025	1.7124	0.0022	0.0165586	yes
ENSDARG00000052923	zgc:113162	21:13286683-13335815	mut	Mo	OK	0.603669	1.70272	2.30639	1.49601	1.59587	0.00145	0.0118317	yes
ENSDARG00000054344	gabpb2b	16:38387750-38397524	mut	Mo	OK	12.7638	17.431	30.1948	0.449593	1.51149	0.0083	0.045608	yes
ENSDARG00000104953	stt3a	10:39291387-39362396	mut	Mo	OK	54.0986	73.8728	127.971	0.449454	1.53113	0.0074	0.0418955	yes
ENSDARG00000043848	sod1	10:25732681-25737741	mut	Mo	OK	25.8158	35.2485	61.0643	0.449309	1.51669	0.0084	0.04607	yes
ENSDARG00000104938	ftsj3	22:3167287-3194717	mut	Mo	OK	10.09	13.7724	23.8624	0.448843	1.64419	0.00425	0.0275362	yes
ENSDARG00000097020	si:dkey-261m9.8	25:34629434-34629845	mut	Mo	OK	358.437	489.109	847.546	0.448436	1.7455	0.0026	0.0188503	yes
ENSDARG00000101209	lamb1a	25:31135500-31218295	mut	Mo	OK	59.6109	81.3296	140.94	0.448204	1.73446	0.00215	0.0162528	yes
ENSDARG00000055455	gpm6aa	14:36008234-36038180	mut	Mo	OK	17.8476	24.3332	42.1808	0.447198	1.50919	0.00385	0.0255548	yes
ENSDARG00000061468	ncaph	5:27659501-27670792	mut	Mo	OK	27.6773	37.7159	65.3932	0.446467	1.73855	0.0025	0.0183242	yes
ENSDARG00000053248	inab	1:31131835-31135149	mut	Mo	OK	5.43649	3.6845	9.12099	-0.561207	-1.67813	0.00365	0.0246418	yes
ENSDARG00000053257	zgc:153733	3:32693594-32700257	mut	Mo	OK	1.00992	0.215623	1.22554	-2.22766	-2.11872	0.0008	0.00734984	yes
ENSDARG00000101755	prkar1ab	12:2835937-2861069	mut	Mo	OK	14.2087	19.3605	33.5692	0.446339	1.61848	0.0043	0.0277154	yes
ENSDARG00000053279	apln	14:33382635-33417401	mut	Mo	OK	3.28565	1.57792	4.86357	-1.05815	-1.9578	0.00085	0.00771532	yes
ENSDARG00000053293	ftr14	2:43281728-43286282	mut	Mo	OK	1.38016	3.17795	4.55811	1.20326	3.06877	5e-05	0.000738265	yes
ENSDARG00000053318	lrrc6	2:43248818-43274531	mut	Mo	OK	0.486855	2.10696	2.59381	2.1136	3.45435	5e-05	0.000738265	yes
ENSDARG00000053362	cilp	7:31160989-31170270	mut	Mo	OK	0.871151	0.498401	1.36955	-0.805618	-1.76526	0.0033	0.0227386	yes
ENSDARG00000053431	si:ch211-257p13.3	16:16646709-16682803	mut	Mo	OK	1.7758	1.01516	2.79096	-0.806762	-2.2845	0.00025	0.00293113	yes
ENSDARG00000037879	lfng	3:41775640-41785011	mut	Mo	OK	178.289	242.794	421.083	0.445515	1.44044	0.005	0.0312527	yes
ENSDARG00000102590	polr3h	3:5109660-5120248	mut	Mo	OK	20.8522	28.3948	49.247	0.445427	1.57428	0.00565	0.034124	yes
ENSDARG00000052063	col4a5	7:50828151-50919360	mut	Mo	OK	23.4981	31.9852	55.4833	0.444864	1.7358	0.0026	0.0188503	yes
ENSDARG00000006837	mycn	20:33391548-33396505	mut	Mo	OK	64.9929	88.455	153.448	0.444662	1.72964	0.00255	0.0186199	yes
ENSDARG00000053499	isl2b	7:29721738-29726294	mut	Mo	OK	1.28299	0.577592	1.86058	-1.15139	-2.08641	0.00085	0.00771532	yes
ENSDARG00000053544	hspa4l	17:43439826-43475779	mut	Mo	OK	1.3726	0.881931	2.25453	-0.638172	-1.54514	0.0086	0.046812	yes
ENSDARG00000002285	mcoln1a	1:44979891-45008779	mut	Mo	OK	9.50996	12.937	22.447	0.443995	1.71083	0.00315	0.0219753	yes
ENSDARG00000053559	tspan3b	7:29804094-29811781	mut	Mo	OK	0.3655	0.798459	1.16396	1.12735	2.13395	0.001	0.00882317	yes
ENSDARG00000016011	gpcpd1	20:45765277-45819220	mut	Mo	OK	11.2975	15.3682	26.6657	0.443944	1.59221	0.00545	0.0332749	yes
ENSDARG00000035741	slc25a11	5:67397950-67414207	mut	Mo	OK	11.2008	15.2367	26.4375	0.443942	1.53041	0.0075	0.0423512	yes
ENSDARG00000005458	csnk1g2a	2:23383389-23423097	mut	Mo	OK	21.1819	28.8015	49.9834	0.443309	1.69594	0.00245	0.0180491	yes
ENSDARG00000074571	gpaa1	2:2339421-2356487	mut	Mo	OK	14.2706	19.3883	33.6589	0.442146	1.64508	0.0046	0.0291725	yes
ENSDARG00000053831	vtnb	21:39022453-39036049	mut	Mo	OK	1.30051	0.421983	1.72249	-1.62382	-2.10255	0.0004	0.00422996	yes
ENSDARG00000016977	snx27b	16:23580567-23609342	mut	Mo	OK	7.32546	9.94681	17.2723	0.441314	1.51038	0.00865	0.0469664	yes
ENSDARG00000070560	nap1l4a	25:23458070-23485569	mut	Mo	OK	19.6965	26.7384	46.4349	0.440976	1.62837	0.00515	0.0319602	yes
ENSDARG00000032327	usp36	3:57513131-57560267	mut	Mo	OK	4.26235	5.78431	10.0467	0.440495	1.56957	0.00675	0.0391212	yes
ENSDARG00000032617	fgfrl1a	14:17116014-17258120	mut	Mo	OK	24.6285	33.4204	58.0489	0.440397	1.64384	0.0044	0.0282341	yes
ENSDARG00000053896	slc30a1b	17:37268234-37273459	mut	Mo	OK	3.01675	1.87903	4.89578	-0.683006	-1.66607	0.00405	0.0264974	yes
ENSDARG00000079326	cabin1	8:51793204-51947135	mut	Mo	OK	9.67193	13.1129	22.7848	0.439113	1.58013	0.0061	0.0361626	yes
ENSDARG00000053934	hdhd3	6:41021028-41024329	mut	Mo	OK	1.30261	2.67706	3.97967	1.03925	2.11487	0.00025	0.00293113	yes
ENSDARG00000056089	nrbp1	20:26103443-26125834	mut	Mo	OK	12.548	17.0083	29.5563	0.438785	1.6771	0.00325	0.0224833	yes
ENSDARG00000054023	ttll6	12:27005474-27024052	mut	Mo	OK	0.652592	1.52567	2.17826	1.22519	1.62276	0.0009	0.0081056	yes
ENSDARG00000054033	hoxb1b	12:27049779-27051474	mut	Mo	OK	1.21296	0.536878	1.74984	-1.17587	-1.8817	0.00295	0.0208906	yes
ENSDARG00000032933	dtx2	5:58883969-58925888	mut	Mo	OK	8.28517	11.2281	19.5133	0.438508	1.6133	0.0053	0.0325767	yes
ENSDARG00000101508	nr6a1a	8:52901935-52952241	mut	Mo	OK	49.7936	67.4649	117.258	0.438175	1.6965	0.00255	0.0186199	yes
ENSDARG00000105352	si:dkey-23a13.7	7:5787623-5788029	mut	Mo	OK	2552.62	3457.37	6009.99	0.437696	1.6644	0.0039	0.0257979	yes
ENSDARG00000054208	phkg2	12:28774070-28795532	mut	Mo	OK	4.78295	3.13129	7.91424	-0.611141	-1.49808	0.00885	0.0477389	yes
ENSDARG00000025375	idh1	9:28293872-28317287	mut	Mo	OK	15.119	20.4758	35.5948	0.437553	1.58976	0.005	0.0312527	yes
ENSDARG00000053459	rybpb	6:44009172-44046849	mut	Mo	OK	6.37007	8.61765	14.9877	0.435985	1.58128	0.0058	0.034764	yes
ENSDARG00000054340	sla1	19:35326734-35340081	mut	Mo	OK	1.58433	0.624265	2.20859	-1.34364	-2.02351	0.0008	0.00734984	yes
ENSDARG00000020242	fermt2	17:50622811-50708685	mut	Mo	OK	20.9068	28.2582	49.165	0.434693	1.648	0.00345	0.0235757	yes
ENSDARG00000054420	rpe65c	8:16666393-16676543	mut	Mo	OK	5.368	2.30566	7.67366	-1.21921	-3.21268	5e-05	0.000738265	yes
ENSDARG00000054542	il12bb	21:35255585-35269628	mut	Mo	OK	2.60433	0.80365	3.40798	-1.69627	-3.69154	5e-05	0.000738265	yes
ENSDARG00000063182	rc3h1b	2:7277981-7317988	mut	Mo	OK	8.02012	10.838	18.8581	0.434401	1.66718	0.0032	0.0221904	yes
ENSDARG00000054584	FO681288.1	18:48949087-48958215	mut	Mo	OK	1.81119	1.04772	2.85891	-0.789684	-1.9846	0.00095	0.00847242	yes
ENSDARG00000054609	slco2b1	21:40116961-40151124	mut	Mo	OK	0.866422	0.318284	1.18471	-1.44476	-1.56745	0.00405	0.0264974	yes
ENSDARG00000054610	coro1a	3:30795521-30810520	mut	Mo	OK	2.64217	1.61033	4.2525	-0.714364	-1.69892	0.0052	0.0321556	yes
ENSDARG00000004594	znf800a	25:26452191-26469000	mut	Mo	OK	6.26833	8.47033	14.7387	0.434336	1.51278	0.0088	0.0476171	yes
ENSDARG00000054794	plcxd3	8:31812163-31853622	mut	Mo	OK	0.509896	1.10404	1.61394	1.11452	2.06515	0.00155	0.0125124	yes
ENSDARG00000070297	si:ch211-113a14.28	25:35820201-35820573	mut	Mo	OK	166.693	225.226	391.919	0.434185	1.50057	0.009	0.0483677	yes
ENSDARG00000033259	dis3l2	2:5929225-5972522	mut	Mo	OK	10.7806	14.5473	25.3279	0.432316	1.67058	0.0037	0.0248826	yes
ENSDARG00000100487	nploc4	12:36260326-36282670	mut	Mo	OK	5.03544	6.79467	11.8301	0.432286	1.51969	0.0079	0.0440371	yes
ENSDARG00000054890	rgra	13:29315775-29325409	mut	Mo	OK	2.53004	4.33084	6.86088	0.775486	1.82538	0.0016	0.0128266	yes
ENSDARG00000054942	lgals2a	3:28808782-28829415	mut	Mo	OK	1.7671	0.406758	2.17386	-2.11914	-1.77002	0.00305	0.0213894	yes
ENSDARG00000054957	znf1015	4:71931860-71945671	mut	Mo	OK	2.63776	1.3077	3.94546	-1.01228	-2.71624	5e-05	0.000738265	yes
ENSDARG00000055036	itih3a	11:3594938-3609829	mut	Mo	OK	1.13816	0.102325	1.24049	-3.47547	-1.48485	0.00045	0.00467053	yes
ENSDARG00000074756	tfb2m	17:11904442-11919289	mut	Mo	OK	9.03021	12.1849	21.2151	0.432265	1.49653	0.0085	0.046384	yes
ENSDARG00000002787	tle3a	18:20236894-20268445	mut	Mo	OK	10.6381	14.3394	24.9775	0.430746	1.59962	0.0047	0.0296767	yes
ENSDARG00000057105	nle1	10:23101288-23130403	mut	Mo	OK	20.2249	27.2591	47.484	0.430609	1.58102	0.0063	0.0370197	yes
ENSDARG00000055118	mylipb	16:25620960-25633706	mut	Mo	OK	3.57476	5.20285	8.77761	0.541458	1.61136	0.0062	0.0366055	yes
ENSDARG00000078308	spry2	1:4557534-4561637	mut	Mo	OK	19.1519	25.7989	44.9508	0.429817	1.60126	0.0045	0.0287272	yes
ENSDARG00000055225	dock8	8:30316666-30415790	mut	Mo	OK	1.95215	4.4679	6.42005	1.19453	3.92974	5e-05	0.000738265	yes
ENSDARG00000055226	slc7a7	7:19310076-19335574	mut	Mo	OK	1.42985	0.670315	2.10017	-1.09295	-2.21268	0.0004	0.00422996	yes
ENSDARG00000055270	si:ch1073-358c10.1	17:27319342-27366100	mut	Mo	OK	4.76386	1.68371	6.44757	-1.50049	-1.77913	0.00295	0.0208906	yes
ENSDARG00000055278	cfb	21:27379588-27394702	mut	Mo	OK	0.949575	0.231616	1.18119	-2.03554	-2.80654	0.0001	0.00134605	yes
ENSDARG00000002991	cep135	20:25811700-25836225	mut	Mo	OK	7.06464	9.5155	16.5801	0.429664	1.55536	0.00685	0.0395292	yes
ENSDARG00000055395	foxq1b	20:26784842-26786305	mut	Mo	OK	5.91025	3.81261	9.72286	-0.632438	-1.75941	0.00255	0.0186199	yes
ENSDARG00000007918	ttc27	17:22740289-22927281	mut	Mo	OK	29.7276	40.0334	69.761	0.429401	1.67942	0.00315	0.0219753	yes
ENSDARG00000075793	prex1	8:25404868-25552935	mut	Mo	OK	5.12428	6.90037	12.0246	0.429324	1.54053	0.0065	0.038002	yes
ENSDARG00000014008	cwc22	9:43750727-43842474	mut	Mo	OK	33.9223	45.664	79.5863	0.428827	1.60544	0.00515	0.0319602	yes
ENSDARG00000055518	pygma	21:28408356-28435544	mut	Mo	OK	1.43005	0.797065	2.22711	-0.843297	-1.85839	0.0021	0.0159651	yes
ENSDARG00000055530	sertad2b	13:24370512-24394095	mut	Mo	OK	2.88857	1.7587	4.64727	-0.715849	-2.31655	0.0001	0.00134605	yes
ENSDARG00000055565	cacnb2b	2:31479918-31530139	mut	Mo	OK	0.597067	1.52684	2.12391	1.35458	2.17465	5e-05	0.000738265	yes
ENSDARG00000055569	ghdc	12:13489118-13511235	mut	Mo	OK	0.558966	1.73358	2.29255	1.63292	3.33162	5e-05	0.000738265	yes
ENSDARG00000055589	s100t	16:22766427-22767996	mut	Mo	OK	4.66464	1.13479	5.79943	-2.03934	-3.01319	5e-05	0.000738265	yes
ENSDARG00000008155	sms	21:25362527-25379786	mut	Mo	OK	17.9584	24.174	42.1324	0.428795	1.60228	0.00445	0.0284708	yes
ENSDARG00000055618	acta1b	13:24148570-24155940	mut	Mo	OK	2.31349	0.244241	2.55773	-3.24369	-3.07685	0.00365	0.0246418	yes
ENSDARG00000077456	si:ch211-113a14.12	25:35777314-35778185	mut	Mo	OK	91.2897	122.814	214.104	0.427952	1.60472	0.0054	0.033051	yes
ENSDARG00000055644	prss60.2	6:39100860-39107944	mut	Mo	OK	1.26282	0.377728	1.64055	-1.74123	-2.49223	0.0006	0.00587614	yes
ENSDARG00000079745	si:ch211-166a6.5	8:4377715-4451542	mut	Mo	OK	27.5526	37.0296	64.5822	0.426487	1.44261	0.0077	0.0432136	yes
ENSDARG00000055655	birc5b	23:28396444-28399305	mut	Mo	OK	0.592993	1.74763	2.34062	1.55931	1.20441	0.00675	0.0391212	yes
ENSDARG00000012261	eftud2	3:16239205-16263835	mut	Mo	OK	41.2628	55.4351	96.6979	0.425958	1.58855	0.0062	0.0366055	yes
ENSDARG00000036687	bcl9	1:46640411-46717831	mut	Mo	OK	11.519	15.4751	26.9941	0.425931	1.63949	0.0048	0.0302092	yes
ENSDARG00000055683	pimr191	15:25144775-25147935	mut	Mo	OK	0.282155	2.54607	2.82822	3.17372	4.14581	5e-05	0.000738265	yes
ENSDARG00000055730	trim35-29	16:26973052-26975876	mut	Mo	OK	1.14452	0.569835	1.71435	-1.00613	-1.73667	0.0034	0.023335	yes
ENSDARG00000055784	ptpn3	16:26673709-26727182	mut	Mo	OK	4.46262	3.04393	7.50655	-0.551953	-1.82109	0.0014	0.0115375	yes
ENSDARG00000055857	dopey2	9:33343981-33384864	mut	Mo	OK	4.71647	2.76932	7.48579	-0.768174	-1.45699	0.00375	0.0250925	yes
ENSDARG00000055876	msmo1	1:20223613-20235835	mut	Mo	OK	0.475524	1.93648	2.412	2.02585	3.20929	5e-05	0.000738265	yes
ENSDARG00000042839	dph6	17:53068634-53109337	mut	Mo	OK	21.3722	28.7069	50.0791	0.425662	1.37853	0.0086	0.046812	yes
ENSDARG00000058861	ncl1	22:4849020-4867637	mut	Mo	OK	43.3898	58.2698	101.66	0.425392	1.65477	0.0039	0.0257979	yes
ENSDARG00000055648	cpda	15:24821594-24859345	mut	Mo	OK	7.91924	10.6348	18.554	0.42536	1.64522	0.0044	0.0282341	yes
ENSDARG00000056045	GUCY2C (1 of many)	12:18943609-18969340	mut	Mo	OK	3.1274	1.69942	4.82682	-0.879925	-2.58763	5e-05	0.000738265	yes
ENSDARG00000057936	lhx5	21:15815539-15870923	mut	Mo	OK	27.9672	37.5539	65.5211	0.425225	1.629	0.00385	0.0255548	yes
ENSDARG00000060983	smyd4	10:36148830-36160818	mut	Mo	OK	8.00367	10.7471	18.7508	0.425208	1.49819	0.00865	0.0469664	yes
ENSDARG00000056092	si:dkey-12h9.6	20:26127427-26142980	mut	Mo	OK	1.1719	0.65717	1.82907	-0.83451	-1.83631	0.0027	0.0194132	yes
ENSDARG00000056108	ndufa4	12:9842649-9846483	mut	Mo	OK	1.34379	0.576115	1.9199	-1.22188	-1.82426	0.00375	0.0250925	yes
ENSDARG00000009136	tp53bp2a	13:516408-534181	mut	Mo	OK	9.47869	12.7273	22.206	0.425171	1.58968	0.0052	0.0321556	yes
ENSDARG00000005606	paxip1	2:29919142-29939875	mut	Mo	OK	17.8138	23.913	41.7268	0.424805	1.65266	0.00345	0.0235757	yes
ENSDARG00000056151	tyrp1b	1:18639899-18653111	mut	Mo	OK	4.64354	1.42196	6.0655	-1.70735	-4.222	5e-05	0.000738265	yes
ENSDARG00000102012	ppp1cbl	7:74070005-74073372	mut	Mo	OK	50.5011	67.7619	118.263	0.42416	1.55069	0.00655	0.0382428	yes
ENSDARG00000056250	add3b	17:20228340-20376966	mut	Mo	OK	0.448196	0.996385	1.44458	1.15257	2.00552	0.0016	0.0128266	yes
ENSDARG00000099742	heatr1	12:9582065-9662762	mut	Mo	OK	28.7056	38.5034	67.209	0.423655	1.6649	0.0035	0.0238704	yes
ENSDARG00000056314	a2ml	15:21178232-21303684	mut	Mo	OK	4.11944	1.48252	5.60196	-1.4744	-2.86208	5e-05	0.000738265	yes
ENSDARG00000056324	zgc:123295	3:21059217-21068196	mut	Mo	OK	7.16362	2.79492	9.95854	-1.35788	-2.69805	5e-05	0.000738265	yes
ENSDARG00000056339	CABZ01009708.1	16:21686383-21723362	mut	Mo	OK	0.947345	2.12478	3.07212	1.16535	2.70188	5e-05	0.000738265	yes
ENSDARG00000087752	rfwd3	25:36679403-36691723	mut	Mo	OK	11.2219	15.0426	26.2645	0.422735	1.51951	0.0079	0.0440371	yes
ENSDARG00000099798	mon2	25:1554555-1596673	mut	Mo	OK	6.84699	9.16952	16.0165	0.421378	1.57416	0.00545	0.0332749	yes
ENSDARG00000105353	si:ch1073-35f11.1	7:6204799-6205181	mut	Mo	OK	1079.29	1444.98	2524.27	0.420966	1.63119	0.00455	0.0289506	yes
ENSDARG00000038239	tnpo2	3:18657783-18689492	mut	Mo	OK	106.96	143.116	250.076	0.420106	1.5997	0.0059	0.035266	yes
ENSDARG00000086950	si:ch211-269k10.2	16:53306766-53360547	mut	Mo	OK	11.2788	15.0805	26.3593	0.419071	1.46368	0.0079	0.0440371	yes
ENSDARG00000056519	si:dkey-280e21.3	14:25168085-25205292	mut	Mo	OK	3.97324	1.97898	5.95222	-1.00556	-3.39419	5e-05	0.000738265	yes
ENSDARG00000007099	cx43.4	9:46605107-46615368	mut	Mo	OK	67.6793	90.485	158.164	0.418964	1.63615	0.00375	0.0250925	yes
ENSDARG00000100510	actr3	9:56882047-56885117	mut	Mo	OK	69.9715	93.5179	163.489	0.418475	1.582	0.006	0.0356672	yes
ENSDARG00000104437	aip	1:39276934-39291741	mut	Mo	OK	57.3719	76.6333	134.005	0.417627	1.63134	0.0042	0.0272529	yes
ENSDARG00000056656	tspan18a	7:26491764-26565989	mut	Mo	OK	3.7543	6.12202	9.87632	0.705463	1.99124	0.0006	0.00587614	yes
ENSDARG00000032997	rnf185	5:1110041-1125794	mut	Mo	OK	28.6551	38.2429	66.898	0.416402	1.49924	0.0082	0.0452159	yes
ENSDARG00000056741	senp3b	7:26247649-26260896	mut	Mo	OK	11.7607	15.6955	27.4562	0.416381	1.51657	0.0069	0.0397781	yes
ENSDARG00000051800	fnbp4	25:28197256-28225574	mut	Mo	OK	9.45934	12.624	22.0833	0.416359	1.54644	0.00695	0.0399867	yes
ENSDARG00000056874	lygl1	14:20595819-20601254	mut	Mo	OK	1.68626	0.529891	2.21615	-1.67006	-1.80189	0.00275	0.0196911	yes
ENSDARG00000056913	pcolcea	10:22819880-22834379	mut	Mo	OK	2.87741	1.12322	4.00063	-1.35713	-3.07747	5e-05	0.000738265	yes
ENSDARG00000056921	ankk1	15:22078296-22089222	mut	Mo	OK	4.21317	2.85044	7.06361	-0.563718	-1.67114	0.00455	0.0289506	yes
ENSDARG00000101840	U3	1:15765587-15765803	mut	Mo	OK	5854.92	7811.44	13666.4	0.415941	1.56434	0.00635	0.0372757	yes
ENSDARG00000057029	htr2aa	9:25387379-25444621	mut	Mo	OK	2.07202	4.69748	6.7695	1.18085	2.32135	0.00055	0.00550127	yes
ENSDARG00000057053	SGMS1 (1 of many)	17:23710064-23745044	mut	Mo	OK	2.20567	3.19464	5.40031	0.534433	1.65647	0.0047	0.0296767	yes
ENSDARG00000024026	sdf2	21:25984800-25991510	mut	Mo	OK	17.2361	22.9638	40.1999	0.413922	1.54979	0.0074	0.0418955	yes
ENSDARG00000018968	acvr1ba	23:27873977-27896379	mut	Mo	OK	27.545	36.6549	64.1999	0.412213	1.56518	0.004	0.0262892	yes
ENSDARG00000057148	si:dkey-48n15.2	13:16130119-16147839	mut	Mo	OK	6.09219	3.30757	9.39976	-0.881187	-2.73014	5e-05	0.000738265	yes
ENSDARG00000038228	sepw2a	3:19958478-19968602	mut	Mo	OK	78.8195	104.798	183.618	0.410985	1.61103	0.00455	0.0289506	yes
ENSDARG00000057159	ankrd29	22:16380653-16404869	mut	Mo	OK	1.04557	2.0405	3.08607	0.964636	1.76267	0.00555	0.0337431	yes
ENSDARG00000062472	sin3b	8:14174040-14201318	mut	Mo	OK	14.0065	18.6153	32.6218	0.4104	1.55707	0.0078	0.0436901	yes
ENSDARG00000001889	tuba1a	23:35609926-35612595	mut	Mo	OK	116.94	155.396	272.336	0.410177	1.59073	0.00575	0.0345597	yes
ENSDARG00000063525	adpgk	25:2553331-2570512	mut	Mo	OK	10.7409	14.2592	25.0001	0.408769	1.50691	0.0078	0.0436901	yes
ENSDARG00000037708	exosc10	23:15015901-15047724	mut	Mo	OK	20.4939	27.2032	47.6971	0.408584	1.57344	0.0057	0.0343543	yes
ENSDARG00000006514	her6	6:36573188-36574950	mut	Mo	OK	44.2661	58.757	103.023	0.408558	1.51828	0.007	0.0401546	yes
ENSDARG00000057426	oard1	23:19286843-19299366	mut	Mo	OK	0.461831	5.15484	5.61667	3.48049	7.11489	5e-05	0.000738265	yes
ENSDARG00000057433	st6galnac5b	8:17764667-17786547	mut	Mo	OK	2.21338	0.885191	3.09857	-1.32219	-2.71056	5e-05	0.000738265	yes
ENSDARG00000074552	ndufs7	11:5845376-5855460	mut	Mo	OK	82.0836	108.942	191.026	0.408399	1.57918	0.0053	0.0325767	yes
ENSDARG00000057477	lrrc28	7:15369864-15408674	mut	Mo	OK	1.89776	3.17734	5.0751	0.743521	2.35257	0.0001	0.00134605	yes
ENSDARG00000057575	pnp4a	11:24052513-24060085	mut	Mo	OK	1.30679	0.159413	1.4662	-3.03519	-3.32938	0.00045	0.00467053	yes
ENSDARG00000018623	rad54l	6:3313540-3331241	mut	Mo	OK	16.5778	21.9822	38.56	0.407083	1.54311	0.0074	0.0418955	yes
ENSDARG00000006420	atrnl1b	12:29727933-29917286	mut	Mo	OK	8.80542	11.6752	20.4806	0.406984	1.57376	0.0058	0.034764	yes
ENSDARG00000070922	cnbpb	11:465088-471356	mut	Mo	OK	75.2514	99.747	174.998	0.406554	1.55589	0.0068	0.0393191	yes
ENSDARG00000061013	ankfy1	5:30395971-30430687	mut	Mo	OK	18.3979	24.3855	42.7834	0.40648	1.57277	0.0062	0.0366055	yes
ENSDARG00000075347	chfr	5:17276478-17309303	mut	Mo	OK	17.1563	22.7355	39.8918	0.406206	1.53757	0.00625	0.0368256	yes
ENSDARG00000092467	si:ch73-46j18.5	10:1680370-1690649	mut	Mo	OK	36.4216	48.2342	84.6558	0.405261	1.585	0.00575	0.0345597	yes
ENSDARG00000056184	dvl2	7:20008203-20043464	mut	Mo	OK	16.013	21.1968	37.2098	0.4046	1.58212	0.00555	0.0337431	yes
ENSDARG00000056627	cxcl14	14:24103553-24113428	mut	Mo	OK	68.8646	91.1232	159.988	0.404056	1.58188	0.00585	0.0350395	yes
ENSDARG00000057899	zgc:114081	23:16880865-16886689	mut	Mo	OK	2.34873	6.19444	8.54317	1.3991	2.93408	5e-05	0.000738265	yes
ENSDARG00000057911	zgc:86709	20:9983545-9993078	mut	Mo	OK	1.18892	0.16292	1.35184	-2.86741	-3.06119	0.0076	0.0428045	yes
ENSDARG00000057918	tsc1b	21:17265153-17303196	mut	Mo	OK	3.62474	5.57089	9.19563	0.62003	2.22313	0.0001	0.00134605	yes
ENSDARG00000070187	dyrk1b	16:42107965-42202113	mut	Mo	OK	7.71201	10.1946	17.9066	0.402626	1.4761	0.0092	0.0491535	yes
ENSDARG00000101903	zfyve9a	2:19631764-19705558	mut	Mo	OK	9.23117	12.1959	21.4271	0.401805	1.53886	0.00795	0.0442306	yes
ENSDARG00000058003	wfdc1	18:14626839-14649200	mut	Mo	OK	1.74384	3.47375	5.21759	0.994222	2.65331	5e-05	0.000738265	yes
ENSDARG00000058042	kitlgb	4:9507588-9514482	mut	Mo	OK	2.4765	1.44454	3.92104	-0.777692	-1.80408	0.00245	0.0180491	yes
ENSDARG00000029911	casc3	3:23298404-23331406	mut	Mo	OK	17.6117	23.2364	40.8481	0.399849	1.54257	0.00695	0.0399867	yes
ENSDARG00000060004	fzd7a	9:13381104-13383868	mut	Mo	OK	69.7507	91.9879	161.739	0.399236	1.56704	0.00665	0.0387096	yes
ENSDARG00000058102	sardh	10:10429089-10603580	mut	Mo	OK	4.27092	1.62256	5.89348	-1.39627	-3.93579	5e-05	0.000738265	yes
ENSDARG00000013207	zeb1b	12:26658913-26760366	mut	Mo	OK	14.2844	18.806	33.0904	0.396754	1.54637	0.007	0.0401546	yes
ENSDARG00000058160	tnfaip2b	13:7109820-7121500	mut	Mo	OK	3.85967	2.48232	6.34199	-0.63679	-1.76873	0.00235	0.0174606	yes
ENSDARG00000020595	gnl3l	11:25248157-25264875	mut	Mo	OK	40.9118	53.7855	94.6973	0.394699	1.53418	0.00795	0.0442306	yes
ENSDARG00000105430	si:ch73-368j24.11	7:6210301-6211042	mut	Mo	OK	466.69	613.504	1080.19	0.394608	1.54259	0.0072	0.0409904	yes
ENSDARG00000020334	ptpn11a	10:3427889-3452371	mut	Mo	OK	14.2665	18.7531	33.0196	0.394497	1.52136	0.00745	0.0421237	yes
ENSDARG00000058226	ak3	10:11042655-11053762	mut	Mo	OK	23.7148	31.1491	54.8639	0.393404	1.49549	0.0087	0.0471494	yes
ENSDARG00000068928	si:dkey-108k21.26	25:34605350-34605737	mut	Mo	OK	316.897	415.896	732.793	0.392209	1.51772	0.00765	0.0429885	yes
ENSDARG00000023536	nnt	21:19726909-19791787	mut	Mo	OK	41.7665	54.7974	96.5639	0.39176	1.52678	0.0073	0.041451	yes
ENSDARG00000056678	trim47	10:26156408-26166466	mut	Mo	OK	18.8413	24.7052	43.5465	0.390921	1.50932	0.00935	0.0497711	yes
ENSDARG00000039142	arpc5a	2:21309610-21317616	mut	Mo	OK	30.3157	39.6886	70.0043	0.388658	1.52558	0.0081	0.0448068	yes
ENSDARG00000058370	ropn1l	24:21876500-21885903	mut	Mo	OK	1.00669	2.51808	3.52477	1.3227	1.8344	0.00505	0.0314746	yes
ENSDARG00000103953	med12	14:23296743-23387569	mut	Mo	OK	15.4498	20.2237	35.6735	0.388456	1.46904	0.0091	0.0487241	yes
ENSDARG00000017798	bcor	22:11114470-11170556	mut	Mo	OK	9.7651	12.772	22.5371	0.387278	1.49401	0.00845	0.0462566	yes
ENSDARG00000030241	vbp1	7:23615598-23623722	mut	Mo	OK	42.3916	55.3388	97.7304	0.384513	1.50834	0.00895	0.0481288	yes
ENSDARG00000053196	mtor	8:46069729-46314039	mut	Mo	OK	10.6819	13.9433	24.6252	0.384405	1.48991	0.00915	0.0489315	yes
ENSDARG00000009494	xrcc1	16:54351048-54387738	mut	Mo	OK	28.8172	37.5473	66.3645	0.381779	1.48931	0.0091	0.0487241	yes
ENSDARG00000058502	olah	19:10730499-10737776	mut	Mo	OK	4.21203	1.68215	5.89418	-1.32422	-2.44861	0.00015	0.00190953	yes
ENSDARG00000058508	CFAP70	3:12036960-12087556	mut	Mo	OK	2.3918	0.172025	2.56383	-3.7974	-5.04628	5e-05	0.000738265	yes
ENSDARG00000058587	ccdc79	18:7497661-7520219	mut	Mo	OK	2.65642	1.46002	4.11644	-0.863498	-2.57431	5e-05	0.000738265	yes
ENSDARG00000075445	psmb5	2:38390943-38410247	mut	Mo	OK	92.8801	120.88	213.76	0.380136	1.47125	0.00765	0.0429885	yes
ENSDARG00000099109	si:ch1073-82k10.1	7:72394910-72500883	mut	Mo	OK	16.2458	21.1333	37.3791	0.379451	1.48732	0.00925	0.0493295	yes
ENSDARG00000058794	si:dkey-19a16.2	22:6043780-6052601	mut	Mo	OK	0.536976	1.33296	1.86994	1.31171	2.18591	0.00025	0.00293113	yes
ENSDARG00000005941	yes1	2:31287863-31393389	mut	Mo	OK	44.765	40.5555	85.3205	-0.142475	-0.511788	0.3433	0.58994	no
ENSDARG00000058835	PLEKHG3	20:3132646-3183121	mut	Mo	OK	3.00103	1.50136	4.50239	-0.99919	-2.78283	5e-05	0.000738265	yes
ENSDARG00000095273	cox8a	21:28441967-28465575	mut	Mo	OK	346.706	266.532	613.238	-0.379404	-1.48593	0.0079	0.0440371	yes
ENSDARG00000004261	tmed9	14:26106534-26113813	mut	Mo	OK	84.6519	64.7413	149.393	-0.386856	-1.52451	0.00705	0.0402817	yes
ENSDARG00000042489	prkrira	10:32114831-32120545	mut	Mo	OK	45.4128	34.7151	80.1279	-0.387537	-1.5176	0.00825	0.0454483	yes
ENSDARG00000013250	tars	5:43746530-43774821	mut	Mo	OK	87.5999	66.8913	154.491	-0.38911	-1.52598	0.00895	0.0481288	yes
ENSDARG00000059039	mhc1ula	22:5328959-5344278	mut	Mo	OK	5.86703	2.04108	7.90811	-1.5233	-3.86937	5e-05	0.000738265	yes
ENSDARG00000059049	zgc:174904	19:5772680-5781451	mut	Mo	OK	1.51396	0.792146	2.30611	-0.934485	-1.78468	0.00375	0.0250925	yes
ENSDARG00000037997	tubb5	16:10427990-10436718	mut	Mo	OK	136.931	104.538	241.469	-0.389414	-1.52455	0.0085	0.046384	yes
ENSDARG00000100630	lye	19:17461685-17463682	mut	Mo	OK	272.387	207.6	479.987	-0.39185	-1.52635	0.00705	0.0402817	yes
ENSDARG00000035909	mfsd2ab	19:31280531-31296741	mut	Mo	OK	22.5077	17.1341	39.6418	-0.393555	-1.47401	0.0091	0.0487241	yes
ENSDARG00000070545	top1l	11:25058749-25074061	mut	Mo	OK	209.642	159.562	369.204	-0.393809	-1.49478	0.00855	0.0466129	yes
ENSDARG00000053070	gosr2	3:37507577-37519002	mut	Mo	OK	44.1774	33.6225	77.7999	-0.393878	-1.50229	0.0085	0.046384	yes
ENSDARG00000005827	eif2s1a	17:34296398-34306287	mut	Mo	OK	188.961	143.785	332.746	-0.394177	-1.54166	0.00705	0.0402817	yes
ENSDARG00000059298	spcs1	11:3970015-3974351	mut	Mo	OK	171.208	130.212	301.42	-0.394891	-1.53718	0.00795	0.0442306	yes
ENSDARG00000058454	dynll1	8:2428706-2432928	mut	Mo	OK	453.501	344.105	797.606	-0.398258	-1.55317	0.00725	0.0412075	yes
ENSDARG00000016733	psat1	5:68713688-68727260	mut	Mo	OK	46.3533	35.1606	81.5139	-0.39871	-1.5276	0.0085	0.046384	yes
ENSDARG00000059423	prune2	5:54748411-54773128	mut	Mo	OK	2.47036	1.48166	3.95202	-0.737511	-1.985	0.0007	0.00664197	yes
ENSDARG00000033170	sult2st1	12:624353-640031	mut	Mo	OK	49.4221	37.4632	86.8853	-0.399685	-1.50308	0.00875	0.0473761	yes
ENSDARG00000092651	si:dkey-57a22.11	9:22166513-22172790	mut	Mo	OK	19.1379	14.5053	33.6432	-0.399854	-1.5225	0.00835	0.0458247	yes
ENSDARG00000059510	coq2	5:65523849-65536479	mut	Mo	OK	3.15208	4.65763	7.80971	0.563291	1.49269	0.00875	0.0473761	yes
ENSDARG00000059529	KIAA0895L	7:56433784-56445125	mut	Mo	OK	1.87136	0.691783	2.56314	-1.4357	-2.70918	5e-05	0.000738265	yes
ENSDARG00000059534	si:ch211-146m13.3	7:56476256-56492328	mut	Mo	OK	0.876422	0.507803	1.38423	-0.787357	-1.74084	0.0039	0.0257979	yes
ENSDARG00000019365	KRT23	11:11582374-11591449	mut	Mo	OK	385.53	292.111	677.641	-0.400327	-1.5103	0.00845	0.0462566	yes
ENSDARG00000059557	xylt2	3:59886577-59937322	mut	Mo	OK	3.51817	5.49314	9.01131	0.642807	2.27506	0.0001	0.00134605	yes
ENSDARG00000059567	si:ch73-281f12.4	3:58655433-58739508	mut	Mo	OK	3.51996	1.6299	5.14986	-1.11078	-2.86728	5e-05	0.000738265	yes
ENSDARG00000042337	chrac1	19:41930196-41955517	mut	Mo	OK	157.55	119.266	276.816	-0.401629	-1.498	0.0089	0.0479341	yes
ENSDARG00000059601	map1aa	7:52555253-52601613	mut	Mo	OK	1.19984	0.766432	1.96627	-0.646614	-1.89313	0.00125	0.0105211	yes
ENSDARG00000021973	st13	3:24957056-24970178	mut	Mo	OK	31.1903	23.6008	54.7911	-0.40226	-1.52758	0.00745	0.0421237	yes
ENSDARG00000009978	icn	16:23516156-23517520	mut	Mo	OK	452.332	342.205	794.537	-0.402522	-1.56572	0.0056	0.0339164	yes
ENSDARG00000059699	DNAJC16 (1 of many)	23:37380014-37411849	mut	Mo	OK	0.576986	1.95727	2.53426	1.76223	3.03596	5e-05	0.000738265	yes
ENSDARG00000018953	gclm	8:15231717-15239547	mut	Mo	OK	26.764	20.2464	47.0104	-0.402629	-1.48066	0.00765	0.0429885	yes
ENSDARG00000035870	laptm4b	19:33277456-33301638	mut	Mo	OK	11.3953	8.61138	20.0067	-0.404123	-1.49383	0.00905	0.0485913	yes
ENSDARG00000103732	plp1a	14:14271682-14291136	mut	Mo	OK	72.3073	54.6419	126.949	-0.404133	-1.57885	0.0058	0.034764	yes
ENSDARG00000062785	adpgk2	17:11291604-11312634	mut	Mo	OK	43.9393	33.1813	77.1206	-0.405143	-1.595	0.0057	0.0343543	yes
ENSDARG00000015990	hcfc1a	11:25198823-25238569	mut	Mo	OK	49.7117	37.53	87.2417	-0.405541	-1.58247	0.0061	0.0361626	yes
ENSDARG00000105400	si:ch73-368j24.14	7:6226173-6226643	mut	Mo	OK	342.419	258.071	600.49	-0.407993	-1.56225	0.00665	0.0387096	yes
ENSDARG00000016691	cd9b	4:4226080-4252760	mut	Mo	OK	90.3095	68.057	158.367	-0.408135	-1.57326	0.0068	0.0393191	yes
ENSDARG00000057853	atp6v0ca	3:15894879-15905932	mut	Mo	OK	48.6472	36.6439	85.2911	-0.408786	-1.51941	0.0074	0.0418955	yes
ENSDARG00000059939	dab1a	20:8134953-8431318	mut	Mo	OK	2.25692	0.938455	3.19538	-1.26599	-2.65811	5e-05	0.000738265	yes
ENSDARG00000059722	ubac1	5:50580252-50597291	mut	Mo	OK	7.28308	5.4847	12.7678	-0.409136	-1.50702	0.00905	0.0485913	yes
ENSDARG00000089871	si:ch211-203c7.2	12:23641746-23675347	mut	Mo	OK	6.94284	5.22607	12.1689	-0.409799	-1.53066	0.0082	0.0452159	yes
ENSDARG00000078619	pnp5a	7:6517268-6532726	mut	Mo	OK	16.4634	12.3848	28.8482	-0.410699	-1.52738	0.0093	0.0495353	yes
ENSDARG00000009133	myo1eb	16:38251807-38288877	mut	Mo	OK	14.9835	11.2707	26.2542	-0.410799	-1.56527	0.00685	0.0395292	yes
ENSDARG00000014165	ssr3	18:34566500-34573734	mut	Mo	OK	411.721	309.604	721.325	-0.41124	-1.61121	0.0059	0.035266	yes
ENSDARG00000060030	setd1a	3:32582442-32610864	mut	Mo	OK	3.08945	4.24991	7.33936	0.460082	1.66789	0.00395	0.0260394	yes
ENSDARG00000040190	qdpra	14:47886147-47909986	mut	Mo	OK	16.8718	12.6795	29.5513	-0.41212	-1.58755	0.00555	0.0337431	yes
ENSDARG00000060081	crb2b	8:2767881-2848406	mut	Mo	OK	1.76829	1.02778	2.79607	-0.782824	-2.25658	0.0001	0.00134605	yes
ENSDARG00000021113	ptmaa	6:29763579-29804468	mut	Mo	OK	322.883	242.237	565.12	-0.414592	-1.61036	0.0042	0.0272529	yes
ENSDARG00000022340	ufc1	5:57045396-57048633	mut	Mo	OK	36.9148	27.6688	64.5836	-0.415937	-1.52011	0.00805	0.0446439	yes
ENSDARG00000060149	ablim1a	13:43373557-43466114	mut	Mo	OK	0.752796	0.287145	1.03994	-1.39048	-2.16462	0.0002	0.00244048	yes
ENSDARG00000060152	fam155b	5:35815824-35822009	mut	Mo	OK	2.18008	1.00591	3.18599	-1.11587	-1.98191	0.00165	0.0131004	yes
ENSDARG00000015506	klf5a	1:33860921-33880045	mut	Mo	OK	8.07278	6.04845	14.1212	-0.4165	-1.54901	0.00665	0.0387096	yes
ENSDARG00000060263	pecam1	3:59491909-59525948	mut	Mo	OK	1.15145	0.462817	1.61427	-1.31495	-2.37293	0.00035	0.00382708	yes
ENSDARG00000102750	cdh1	7:52788341-52847585	mut	Mo	OK	146.903	110.032	256.935	-0.416933	-1.59392	0.0062	0.0366055	yes
ENSDARG00000023299	snu13b	12:10405941-10409335	mut	Mo	OK	527.787	395.235	923.022	-0.417245	-1.6237	0.0056	0.0339164	yes
ENSDARG00000042975	auh	10:5422270-5475386	mut	Mo	OK	23.0921	17.2762	40.3683	-0.41861	-1.52094	0.00825	0.0454483	yes
ENSDARG00000060366	slc12a9	5:37615770-37648309	mut	Mo	OK	2.23297	3.64538	5.87835	0.707108	2.21364	5e-05	0.000738265	yes
ENSDARG00000060452	sdk2b	12:37287354-37560231	mut	Mo	OK	1.58878	2.99042	4.5792	0.912426	3.08327	5e-05	0.000738265	yes
ENSDARG00000098825	farsa	3:13729599-13751228	mut	Mo	OK	32.6097	24.3736	56.9833	-0.41998	-1.58315	0.0059	0.035266	yes
ENSDARG00000071679	mydgf	22:4750817-4761094	mut	Mo	OK	99.3645	74.2608	173.625	-0.420129	-1.61468	0.0038	0.0253294	yes
ENSDARG00000043134	cux1b	15:2556746-2580262	mut	Mo	OK	16.3611	12.2221	28.5832	-0.42077	-1.55129	0.00675	0.0391212	yes
ENSDARG00000038237	tbc1d12a	17:23216097-23233851	mut	Mo	OK	15.9877	11.9411	27.9288	-0.421028	-1.56356	0.0067	0.0388833	yes
ENSDARG00000060683	lrsam1	5:32265011-32282445	mut	Mo	OK	5.02273	3.61391	8.63664	-0.47491	-1.50659	0.00835	0.0458247	yes
ENSDARG00000044298	phax	10:16071140-16077294	mut	Mo	OK	22.0611	16.476	38.5371	-0.421144	-1.53415	0.00675	0.0391212	yes
ENSDARG00000060711	sv2bb	25:10941650-10992043	mut	Mo	OK	1.66269	0.72713	2.38982	-1.19324	-2.63693	5e-05	0.000738265	yes
ENSDARG00000060741	SYT17	3:31068262-31101204	mut	Mo	OK	1.17491	0.750144	1.92505	-0.64731	-1.58296	0.0081	0.0448068	yes
ENSDARG00000045857	cebpz	20:3272686-3292516	mut	Mo	OK	54.188	40.4617	94.6497	-0.421414	-1.64664	0.00445	0.0284708	yes
ENSDARG00000060766	PXN	8:3391492-3460600	mut	Mo	OK	3.13642	6.03271	9.16913	0.943689	2.74724	5e-05	0.000738265	yes
ENSDARG00000069910	gtf2f2a	1:33962804-33974335	mut	Mo	OK	128.12	95.6426	223.763	-0.421773	-1.6335	0.0051	0.0317293	yes
ENSDARG00000103747	cav1	25:18467075-18481186	mut	Mo	OK	31.7457	23.6614	55.4071	-0.424024	-1.52615	0.0067	0.0388833	yes
ENSDARG00000060862	atxn1b	16:25640276-25653480	mut	Mo	OK	0.486394	1.63847	2.12486	1.75216	4.97451	5e-05	0.000738265	yes
ENSDARG00000098761	rgs2	22:24219648-24221856	mut	Mo	OK	57.9226	43.0919	101.014	-0.42671	-1.56361	0.00535	0.0328375	yes
ENSDARG00000013025	ints6	9:24014570-24030835	mut	Mo	OK	24.5161	18.2286	42.7447	-0.427526	-1.66766	0.0036	0.0244086	yes
ENSDARG00000096118	ost4	4:722946-724072	mut	Mo	OK	252.199	187.479	439.678	-0.427836	-1.54872	0.00815	0.045026	yes
ENSDARG00000061011	hlfb	12:32044369-32050325	mut	Mo	OK	0.27524	1.08638	1.36162	1.98077	1.85333	0.0027	0.0194132	yes
ENSDARG00000020204	nf2a	5:11227615-11309187	mut	Mo	OK	10.4918	7.78625	18.2781	-0.430268	-1.48536	0.00915	0.0489315	yes
ENSDARG00000061017	spns2	5:30180446-30324225	mut	Mo	OK	5.21479	2.6428	7.85759	-0.980544	-2.49108	5e-05	0.000738265	yes
ENSDARG00000061951	golgb1	4:22591880-22617931	mut	Mo	OK	13.1153	9.72997	22.8453	-0.430748	-1.64323	0.0053	0.0325767	yes
ENSDARG00000034956	myclb	19:31218199-31223848	mut	Mo	OK	8.65184	6.4118	15.0636	-0.432276	-1.53053	0.0087	0.0471494	yes
ENSDARG00000044776	clic3	21:13566926-13575466	mut	Mo	OK	21.9326	16.2241	38.1567	-0.434934	-1.54676	0.00705	0.0402817	yes
ENSDARG00000103271	pla2g15	25:13592659-13607426	mut	Mo	OK	9.71073	7.18154	16.8923	-0.435286	-1.49796	0.00845	0.0462566	yes
ENSDARG00000060199	mrpl18	14:35159363-35165223	mut	Mo	OK	61.1826	45.2363	106.419	-0.435641	-1.59578	0.00565	0.034124	yes
ENSDARG00000004034	arhgdig	3:27582767-27638390	mut	Mo	OK	37.0099	27.3385	64.3484	-0.436977	-1.66385	0.00385	0.0255548	yes
ENSDARG00000035622	xbp1	5:15444193-15448703	mut	Mo	OK	192.061	141.688	333.749	-0.43885	-1.7011	0.00285	0.02029	yes
ENSDARG00000102153	nrp1a	24:1163432-1307962	mut	Mo	OK	45.7814	33.7669	79.5483	-0.439152	-1.523	0.00815	0.045026	yes
ENSDARG00000032083	dpysl2b	10:18994836-19035037	mut	Mo	OK	25.1498	18.5415	43.6913	-0.439788	-1.65807	0.00375	0.0250925	yes
ENSDARG00000061259	sost	12:27239963-27244292	mut	Mo	OK	2.08939	0.759199	2.84859	-1.46053	-3.11475	5e-05	0.000738265	yes
ENSDARG00000010603	kctd9b	10:42714136-42727442	mut	Mo	OK	13.0666	9.62664	22.6932	-0.440776	-1.49879	0.009	0.0483677	yes
ENSDARG00000043402	MRPL55	8:15213742-15216095	mut	Mo	OK	36.4016	26.8141	63.2157	-0.441011	-1.54812	0.00765	0.0429885	yes
ENSDARG00000061351	tfpi2	19:41260988-41267986	mut	Mo	OK	1.88233	0.928815	2.81114	-1.01906	-1.99389	0.0012	0.0101792	yes
ENSDARG00000005023	fkbp9	19:42989705-43038014	mut	Mo	OK	141.984	104.586	246.57	-0.441045	-1.66179	0.00345	0.0235757	yes
ENSDARG00000061417	nub1	24:41409786-41439804	mut	Mo	OK	0.420107	1.56226	1.98237	1.89481	2.26101	0.0001	0.00134605	yes
ENSDARG00000005230	ssr2	19:11296008-11320723	mut	Mo	OK	333.442	245.518	578.96	-0.441604	-1.71296	0.0029	0.0205785	yes
ENSDARG00000077664	zgc:110239	19:42921498-42933706	mut	Mo	OK	29.6643	21.8353	51.4996	-0.442064	-1.66589	0.00365	0.0246418	yes
ENSDARG00000061544	ano6	4:2027789-2065079	mut	Mo	OK	0.382845	0.798215	1.18106	1.06002	2.34471	5e-05	0.000738265	yes
ENSDARG00000061549	foxo1b	10:31865365-31917614	mut	Mo	OK	2.41916	1.14067	3.55983	-1.08462	-2.43946	0.0003	0.00340471	yes
ENSDARG00000061585	cyp4v7	14:29634953-29751221	mut	Mo	OK	0.181833	1.17706	1.35889	2.6945	1.63712	0.0073	0.041451	yes
ENSDARG00000103163	tomm20a	13:49253749-49294783	mut	Mo	OK	62.5991	46.0741	108.673	-0.442184	-1.68575	0.0037	0.0248826	yes
ENSDARG00000061621	them4	16:17857143-17891708	mut	Mo	OK	3.48143	2.07679	5.55822	-0.745323	-1.69202	0.0036	0.0244086	yes
ENSDARG00000061636	kcnj9	2:49216175-49248217	mut	Mo	OK	0.853936	0.321975	1.17591	-1.40718	-1.53018	0.00365	0.0246418	yes
ENSDARG00000061664	zgc:162707	9:12433917-12453591	mut	Mo	OK	1.54912	0.424546	1.97367	-1.86745	-2.09038	0.0004	0.00422996	yes
ENSDARG00000076923	kazna	8:26695392-26784601	mut	Mo	OK	10.1291	7.45212	17.5812	-0.442788	-1.54942	0.0065	0.038002	yes
ENSDARG00000061732	raph1b	1:28860404-28943771	mut	Mo	OK	3.90928	5.43091	9.34019	0.474293	1.49695	0.00465	0.0294037	yes
ENSDARG00000061458	phf14	19:38580874-38740613	mut	Mo	OK	11.6748	8.58509	20.2599	-0.443491	-1.50264	0.00835	0.0458247	yes
ENSDARG00000104451	slc39a7	19:19330579-19342984	mut	Mo	OK	107.168	78.7932	185.961	-0.443725	-1.68875	0.0038	0.0253294	yes
ENSDARG00000014794	uqcrc2a	3:58096745-58133544	mut	Mo	OK	38.2811	28.1393	66.4204	-0.444045	-1.64866	0.0036	0.0244086	yes
ENSDARG00000061804	si:ch211-194e15.5	19:31309941-31317277	mut	Mo	OK	1.09355	1.66266	2.75621	0.604479	1.59586	0.0059	0.035266	yes
ENSDARG00000061829	UNC13A	22:20170301-20216254	mut	Mo	OK	0.969005	0.462431	1.43144	-1.06727	-1.65409	0.00605	0.0359399	yes
ENSDARG00000061830	prss12	1:19376400-19449424	mut	Mo	OK	0.743045	1.12344	1.86648	0.596404	1.63808	0.00415	0.026989	yes
ENSDARG00000061908	mfsd12a	2:23425595-23443993	mut	Mo	OK	2.72084	1.60442	4.32526	-0.762005	-2.03795	0.00035	0.00382708	yes
ENSDARG00000061909	si:ch73-233f7.1	14:2464272-2482033	mut	Mo	OK	0.88633	1.38926	2.27559	0.648401	1.94322	0.0005	0.00507126	yes
ENSDARG00000061916	tmem51b	11:25595602-25615596	mut	Mo	OK	2.83225	1.56354	4.39579	-0.85713	-1.84027	0.0024	0.0177259	yes
ENSDARG00000098749	tbcd	3:44088700-44182418	mut	Mo	OK	11.1678	8.20388	19.3717	-0.444968	-1.57187	0.0056	0.0339164	yes
ENSDARG00000061956	SYTL2	10:29351638-29377662	mut	Mo	OK	1.11727	0.642819	1.76009	-0.797487	-1.72581	0.0043	0.0277154	yes
ENSDARG00000078606	zgc:194224	20:3874444-3882256	mut	Mo	OK	26.8869	19.7495	46.6364	-0.445086	-1.54826	0.00655	0.0382428	yes
ENSDARG00000058206	si:ch211-153b23.5	14:11151485-11154988	mut	Mo	OK	104.883	77.0134	181.896	-0.445603	-1.69427	0.0029	0.0205785	yes
ENSDARG00000062024	kif1ab	2:23038665-23103137	mut	Mo	OK	0.752356	0.467018	1.21937	-0.687937	-1.59083	0.0063	0.0370197	yes
ENSDARG00000019838	ugdh	1:22592792-22604014	mut	Mo	OK	46.1341	33.8747	80.0088	-0.445623	-1.63963	0.00385	0.0255548	yes
ENSDARG00000062030	gpr17	6:28133831-28134851	mut	Mo	OK	2.61883	1.34427	3.9631	-0.962102	-1.72664	0.00495	0.0310183	yes
ENSDARG00000059746	plod1a	8:47861080-47906825	mut	Mo	OK	20.9391	15.3604	36.2995	-0.446987	-1.57874	0.00345	0.0235757	yes
ENSDARG00000045749	ppfibp1a	4:10814411-10836771	mut	Mo	OK	14.6234	10.7219	25.3453	-0.44772	-1.65613	0.0038	0.0253294	yes
ENSDARG00000062058	slc12a7b	24:39890800-39997944	mut	Mo	OK	2.50753	1.5774	4.08493	-0.668715	-1.51723	0.00885	0.0477389	yes
ENSDARG00000062059	si:ch211-236l14.4	25:23559330-23648217	mut	Mo	OK	1.0476	0.586335	1.63394	-0.837296	-1.81128	0.0022	0.0165586	yes
ENSDARG00000062082	hipk3b	18:27926274-28015557	mut	Mo	OK	2.14787	3.04031	5.18818	0.501314	1.57888	0.0056	0.0339164	yes
ENSDARG00000062103	ankrd24	22:21334185-21368145	mut	Mo	OK	2.87146	0.296498	3.16796	-3.27569	-2.38557	5e-05	0.000738265	yes
ENSDARG00000062147	otc	9:30457293-30463666	mut	Mo	OK	7.02612	2.79885	9.82497	-1.3279	-3.19023	5e-05	0.000738265	yes
ENSDARG00000062195	fbxo31	25:21763197-21796769	mut	Mo	OK	3.37749	2.20795	5.58544	-0.613242	-1.586	0.00765	0.0429885	yes
ENSDARG00000062221	si:ch211-135f11.1	5:23384513-23406134	mut	Mo	OK	3.71618	1.25108	4.96726	-1.57064	-4.44181	5e-05	0.000738265	yes
ENSDARG00000062272	afg3l2	2:21794686-21811838	mut	Mo	OK	2.81165	4.96414	7.77579	0.820127	2.60383	5e-05	0.000738265	yes
ENSDARG00000062277	ppp2r2cb	14:20906837-20922414	mut	Mo	OK	0.803864	0.272241	1.07611	-1.56207	-2.1768	0.0003	0.00340471	yes
ENSDARG00000062297	soat1	8:14848746-14872518	mut	Mo	OK	0.861607	0.312189	1.1738	-1.46461	-1.79286	0.0025	0.0183242	yes
ENSDARG00000089643	mcama	5:58180889-58269776	mut	Mo	OK	10.1757	7.46052	17.6362	-0.44778	-1.69627	0.0029	0.0205785	yes
ENSDARG00000098992	zgc:114119	19:47918633-47923366	mut	Mo	OK	24.2179	17.7533	41.9712	-0.447985	-1.55484	0.00615	0.0363969	yes
ENSDARG00000008363	mcl1b	16:29651325-29656830	mut	Mo	OK	62.9954	46.1527	109.148	-0.448832	-1.6494	0.00365	0.0246418	yes
ENSDARG00000053684	aldob	14:20809198-20826343	mut	Mo	OK	384.85	281.951	666.801	-0.448854	-1.53449	0.00815	0.045026	yes
ENSDARG00000023584	cdc7	2:11080342-11094166	mut	Mo	OK	18.6162	13.6235	32.2397	-0.45046	-1.63656	0.00525	0.032361	yes
ENSDARG00000062481	mlphb	9:24198143-24212500	mut	Mo	OK	2.67699	0.417345	3.09434	-2.6813	-3.17937	5e-05	0.000738265	yes
ENSDARG00000061974	grhl2b	19:12315446-12372453	mut	Mo	OK	10.3327	7.55753	17.8902	-0.45123	-1.6619	0.004	0.0262892	yes
ENSDARG00000058159	ipo8	4:9359780-9388443	mut	Mo	OK	11.8924	8.69586	20.5883	-0.451634	-1.6571	0.00405	0.0264974	yes
ENSDARG00000062562	egln2	15:8359528-8406926	mut	Mo	OK	2.62156	0.467711	3.08927	-2.48673	-5.56372	5e-05	0.000738265	yes
ENSDARG00000032264	mybl2b	11:1525017-1548068	mut	Mo	OK	42.3424	30.9612	73.3036	-0.451641	-1.54887	0.00795	0.0442306	yes
ENSDARG00000062695	ccdc126	19:20579502-20592679	mut	Mo	OK	3.57378	1.96146	5.53524	-0.865522	-2.08581	0.0007	0.00664197	yes
ENSDARG00000043417	tssc1	17:51173515-51218972	mut	Mo	OK	11.5785	8.46347	20.042	-0.452122	-1.5078	0.0091	0.0487241	yes
ENSDARG00000062721	dennd4a	18:19055772-19106104	mut	Mo	OK	1.6062	2.29013	3.89633	0.511774	1.59472	0.0053	0.0325767	yes
ENSDARG00000062750	si:ch73-74h11.1	20:17049103-17072768	mut	Mo	OK	5.31775	2.65922	7.97697	-0.99981	-3.32134	5e-05	0.000738265	yes
ENSDARG00000040295	apoeb	16:24045711-24048429	mut	Mo	OK	337.812	246.901	584.713	-0.45229	-1.73674	0.0026	0.0188503	yes
ENSDARG00000062770	snx21	23:12493754-12518730	mut	Mo	OK	1.98447	3.28071	5.26518	0.725254	1.67288	0.00555	0.0337431	yes
ENSDARG00000062780	AIFM3	5:12137605-12173342	mut	Mo	OK	0.900171	0.428625	1.3288	-1.07048	-1.6173	0.0087	0.0471494	yes
ENSDARG00000099411	zgc:158343	5:9319115-9320270	mut	Mo	OK	19.0369	13.9121	32.949	-0.45246	-1.52877	0.00805	0.0446439	yes
ENSDARG00000043960	rpf2	20:162254-166354	mut	Mo	OK	63.8818	46.657	110.539	-0.453311	-1.76303	0.0019	0.0147087	yes
ENSDARG00000062823	pi4kab	8:1736412-1833109	mut	Mo	OK	2.40891	0.96902	3.37793	-1.31378	-2.87498	5e-05	0.000738265	yes
ENSDARG00000098769	slitrk6	1:3723906-3726666	mut	Mo	OK	15.0624	11.0003	26.0627	-0.453404	-1.67235	0.0044	0.0282341	yes
ENSDARG00000004492	pcyt1ab	18:46011155-46022120	mut	Mo	OK	11.33	8.27333	19.6033	-0.453605	-1.54529	0.00665	0.0387096	yes
ENSDARG00000039914	gapdhs	16:45077925-45103166	mut	Mo	OK	25.4068	18.542	43.9488	-0.454414	-1.64491	0.0052	0.0321556	yes
ENSDARG00000063050	rc3h2	10:9764617-9816166	mut	Mo	OK	0.474979	0.895432	1.37041	0.91472	1.98205	0.00045	0.00467053	yes
ENSDARG00000063068	syne1b	17:7687721-8016202	mut	Mo	OK	1.45614	3.09164	4.54778	1.08622	1.69255	5e-05	0.000738265	yes
ENSDARG00000100446	si:ch211-286o17.1	6:47425089-47462805	mut	Mo	OK	66.1807	48.2966	114.477	-0.454489	-1.76088	0.0013	0.0108473	yes
ENSDARG00000063140	exd3	10:10921261-11011219	mut	Mo	OK	2.51748	3.66342	6.1809	0.54121	1.73718	0.0026	0.0188503	yes
ENSDARG00000063157	mapk8ip2	18:8297245-8355128	mut	Mo	OK	1.9648	0.973981	2.93878	-1.01242	-1.87644	0.00045	0.00467053	yes
ENSDARG00000099281	LINC00998	4:6630721-6631845	mut	Mo	OK	35.0289	25.5585	60.5874	-0.454745	-1.65424	0.004	0.0262892	yes
ENSDARG00000075622	zgc:174938	16:46601637-46606118	mut	Mo	OK	59.7707	43.5836	103.354	-0.455654	-1.7032	0.00335	0.0230283	yes
ENSDARG00000043873	arid4a	17:11223903-11264487	mut	Mo	OK	24.2732	17.6779	41.9511	-0.457421	-1.59617	0.00525	0.032361	yes
ENSDARG00000063224	nxph2a	9:10043443-10072486	mut	Mo	OK	1.24625	0.31792	1.56417	-1.97086	-2.52399	0.0011	0.00949324	yes
ENSDARG00000077516	RECQL4	19:2897386-2928587	mut	Mo	OK	7.82059	5.6947	13.5153	-0.45766	-1.67205	0.0035	0.0238704	yes
ENSDARG00000063253	hecw2b	1:5608507-5669666	mut	Mo	OK	1.07479	1.7807	2.85549	0.728384	1.72084	0.00355	0.0241639	yes
ENSDARG00000063264	pcdh9	6:4712790-4824198	mut	Mo	OK	2.33761	1.47304	3.81065	-0.666234	-1.91333	0.0007	0.00664197	yes
ENSDARG00000034457	si:ch211-163l21.7	8:23759765-23762394	mut	Mo	OK	635.81	462.614	1098.42	-0.458789	-1.76834	0.0017	0.0134115	yes
ENSDARG00000101175	mcu	13:4593613-4720303	mut	Mo	OK	16.4504	11.9609	28.4113	-0.459798	-1.55552	0.0076	0.0428045	yes
ENSDARG00000057218	tbc1d15	18:17013097-17031165	mut	Mo	OK	10.4311	7.58316	18.0143	-0.460023	-1.60495	0.00565	0.034124	yes
ENSDARG00000099722	zgc:153993	7:54205500-54229187	mut	Mo	OK	21.6364	15.7266	37.363	-0.460251	-1.65842	0.00455	0.0289506	yes
ENSDARG00000063314	apba2a	25:31501191-31530807	mut	Mo	OK	1.40642	2.73597	4.14239	0.960022	2.69308	5e-05	0.000738265	yes
ENSDARG00000016725	gadd45gb.1	21:20678383-20679925	mut	Mo	OK	73.9157	53.6993	127.615	-0.460978	-1.78507	0.0017	0.0134115	yes
ENSDARG00000038868	eng2b	2:29992885-29996423	mut	Mo	OK	54.8578	39.8304	94.6882	-0.461828	-1.79535	0.00225	0.0168401	yes
ENSDARG00000063361	si:ch211-1e14.1	18:12395817-12484832	mut	Mo	OK	1.8501	3.01558	4.86568	0.704836	2.19517	5e-05	0.000738265	yes
ENSDARG00000063375	pter	2:3772409-3785184	mut	Mo	OK	2.64671	6.94317	9.58988	1.39139	3.44691	5e-05	0.000738265	yes
ENSDARG00000063407	CABZ01052815.1	16:1275706-1294474	mut	Mo	OK	1.6215	4.31745	5.93895	1.41285	3.65068	5e-05	0.000738265	yes
ENSDARG00000053493	aldh1a2	7:30055033-30096500	mut	Mo	OK	7.43861	5.39981	12.8384	-0.462123	-1.45505	0.00805	0.0446439	yes
ENSDARG00000068870	fance	8:23710243-23716131	mut	Mo	OK	9.29063	6.74423	16.0349	-0.462123	-1.51718	0.00865	0.0469664	yes
ENSDARG00000063511	si:ch211-15d5.11	17:24677192-24699524	mut	Mo	OK	3.56448	1.99862	5.5631	-0.834686	-1.83442	0.0007	0.00664197	yes
ENSDARG00000063518	zgc:153913	2:50629-53978	mut	Mo	OK	3.80468	0.7328	4.53748	-2.37629	-5.21926	5e-05	0.000738265	yes
ENSDARG00000038397	rpap2	2:11007275-11037454	mut	Mo	OK	10.1632	7.37303	17.5362	-0.463027	-1.62926	0.00485	0.0304797	yes
ENSDARG00000059587	CU928117.1	5:61711453-61883099	mut	Mo	OK	10.8909	7.89664	18.7875	-0.463816	-1.65341	0.0041	0.026744	yes
ENSDARG00000019949	serpinh1b	15:29450291-29454673	mut	Mo	OK	126.338	91.5912	217.929	-0.464011	-1.59699	0.00565	0.034124	yes
ENSDARG00000053152	pcmtd1	24:35297156-35331815	mut	Mo	OK	12.4434	9.01637	21.4598	-0.464759	-1.50938	0.0083	0.045608	yes
ENSDARG00000005675	sec61a1l	6:42380374-42391072	mut	Mo	OK	72.7754	52.7293	125.505	-0.464847	-1.79187	0.0013	0.0108473	yes
ENSDARG00000063684	ppm1h	25:1511318-1544329	mut	Mo	OK	0.715846	2.26815	2.984	1.6638	3.44448	5e-05	0.000738265	yes
ENSDARG00000063690	nrm	19:816398-822466	mut	Mo	OK	4.44134	2.44537	6.88671	-0.860942	-2.77054	5e-05	0.000738265	yes
ENSDARG00000052074	si:ch211-122f10.4	7:51541250-51550000	mut	Mo	OK	18.2811	13.2451	31.5262	-0.464889	-1.49992	0.00925	0.0493295	yes
ENSDARG00000067668	CABZ01073329.1	15:47637146-47643338	mut	Mo	OK	2.34163	4.37441	6.71604	0.901579	2.41241	5e-05	0.000738265	yes
ENSDARG00000035074	rtel1	11:12754246-12801608	mut	Mo	OK	15.3223	11.0907	26.413	-0.466282	-1.77179	0.0017	0.0134115	yes
ENSDARG00000067672	card9	5:50510223-50519640	mut	Mo	OK	2.368	0.950997	3.319	-1.31616	-2.93837	5e-05	0.000738265	yes
ENSDARG00000040070	coil	3:35990183-35997636	mut	Mo	OK	15.2953	11.0709	26.3662	-0.466317	-1.67178	0.0041	0.026744	yes
ENSDARG00000042934	ctgfa	20:25441723-25444400	mut	Mo	OK	18.417	13.3284	31.7454	-0.466535	-1.69998	0.0032	0.0221904	yes
ENSDARG00000075253	pik3cb	15:7068021-7165080	mut	Mo	OK	10.1345	7.33254	17.467	-0.466889	-1.75487	0.0019	0.0147087	yes
ENSDARG00000068179	trib2	20:45531766-45550328	mut	Mo	OK	2.76712	5.32335	8.09047	0.943951	3.14214	5e-05	0.000738265	yes
ENSDARG00000019156	haus5	8:20865763-20882744	mut	Mo	OK	27.6127	19.9779	47.5906	-0.466926	-1.77516	0.00195	0.0150354	yes
ENSDARG00000068193	tmem44	11:33938750-33956779	mut	Mo	OK	0.367842	0.970262	1.3381	1.39929	1.95331	0.0039	0.0257979	yes
ENSDARG00000043209	nsun5	10:35209067-35220431	mut	Mo	OK	36.2437	26.2135	62.4572	-0.46742	-1.73899	0.00255	0.0186199	yes
ENSDARG00000068232	cbln12	2:38139086-38143329	mut	Mo	OK	0.407991	1.50316	1.91115	1.88139	2.38485	0.0025	0.0183242	yes
ENSDARG00000068250	si:ch211-151h10.2	18:44309698-44323466	mut	Mo	OK	2.63979	0.538413	3.1782	-2.29364	-3.89504	5e-05	0.000738265	yes
ENSDARG00000063313	plbd1	3:3955038-3999637	mut	Mo	OK	10.8587	7.84811	18.7068	-0.468432	-1.60111	0.0056	0.0339164	yes
ENSDARG00000059993	trpm4a	3:32360752-32387233	mut	Mo	OK	6.20129	4.48142	10.6827	-0.468614	-1.67294	0.0032	0.0221904	yes
ENSDARG00000068323	astn1	2:34589764-34999969	mut	Mo	OK	0.503564	2.95756	3.46112	2.55416	3.65724	5e-05	0.000738265	yes
ENSDARG00000068456	tmem91	18:36033653-36065354	mut	Mo	OK	1.40483	0.104312	1.50914	-3.75141	-1.01398	0.00215	0.0162528	yes
ENSDARG00000068480	map7d2a	5:23457362-23495977	mut	Mo	OK	0.664624	1.26012	1.92474	0.922952	1.83639	0.0032	0.0221904	yes
ENSDARG00000005993	prc1b	7:50080520-50094866	mut	Mo	OK	30.7869	22.2309	53.0178	-0.469754	-1.79238	0.0023	0.0171404	yes
ENSDARG00000068621	si:ch211-181d7.3	15:42785206-42804045	mut	Mo	OK	1.68688	1.0894	2.77628	-0.630825	-1.5694	0.0073	0.041451	yes
ENSDARG00000068701	gpr85	4:6634850-6639035	mut	Mo	OK	0.956925	0.511557	1.46848	-0.90351	-1.80306	0.0027	0.0194132	yes
ENSDARG00000088924	si:dkey-185e18.7	14:4056793-4070332	mut	Mo	OK	18.5887	13.4045	31.9932	-0.471712	-1.70735	0.00255	0.0186199	yes
ENSDARG00000068726	masp1	15:36329470-36365888	mut	Mo	OK	1.85716	0.752955	2.61011	-1.30246	-1.54707	0.00265	0.0191329	yes
ENSDARG00000068763	plcg2	18:13280443-13326826	mut	Mo	OK	1.65697	0.981993	2.63896	-0.75476	-1.31746	0.00735	0.041694	yes
ENSDARG00000068814	spata2l	18:14715602-14719926	mut	Mo	OK	2.79653	6.52393	9.32046	1.2221	3.68158	5e-05	0.000738265	yes
ENSDARG00000068833	dclre1b	8:24087219-24092336	mut	Mo	OK	5.56088	3.85511	9.41599	-0.52854	-1.64967	0.0053	0.0325767	yes
ENSDARG00000068849	fam83ha	13:42438605-42453377	mut	Mo	OK	0.977154	0.441094	1.41825	-1.1475	-2.92865	5e-05	0.000738265	yes
ENSDARG00000105491	arhgef5	16:17707385-17730487	mut	Mo	OK	6.21097	4.47826	10.6892	-0.47188	-1.69477	0.0033	0.0227386	yes
ENSDARG00000017321	kdr	20:22321314-22377871	mut	Mo	OK	6.81889	4.91419	11.7331	-0.472583	-1.72552	0.0027	0.0194132	yes
ENSDARG00000015947	matn4	6:52759103-52847865	mut	Mo	OK	7.75405	5.57867	13.3327	-0.475027	-1.67682	0.0036	0.0244086	yes
ENSDARG00000007697	fabp7a	17:15425584-15427954	mut	Mo	OK	71.6224	51.5173	123.14	-0.475355	-1.73793	0.00275	0.0196911	yes
ENSDARG00000068934	cyp1b1	13:41885314-41892978	mut	Mo	OK	3.16469	0.633026	3.79772	-2.32173	-5.22525	5e-05	0.000738265	yes
ENSDARG00000068947	si:ch211-264e16.1	18:15735207-15750634	mut	Mo	OK	6.96543	2.20487	9.1703	-1.65952	-5.29536	5e-05	0.000738265	yes
ENSDARG00000068966	si:ch211-261n11.7	8:22456850-22468746	mut	Mo	OK	0	3.74378	3.74378	inf	#NAME?	5e-05	0.000738265	yes
ENSDARG00000068974	lim2.1	10:30009934-30016825	mut	Mo	OK	2.60955	0.81653	3.42608	-1.67622	-1.52957	0.00495	0.0310183	yes
ENSDARG00000091902	b3gnt2b	17:24018389-24063963	mut	Mo	OK	20.8602	14.9905	35.8507	-0.476706	-1.68558	0.0032	0.0221904	yes
ENSDARG00000027611	sdpra	9:24412198-24431723	mut	Mo	OK	8.73534	6.27273	15.0081	-0.477772	-1.5576	0.00865	0.0469664	yes
ENSDARG00000069029	acss2l	2:54855919-54909268	mut	Mo	OK	1.14608	2.0515	3.19758	0.839979	1.75207	0.0027	0.0194132	yes
ENSDARG00000060954	tmcc1b	11:18029345-18071715	mut	Mo	OK	10.9919	7.8908	18.8827	-0.478192	-1.74715	0.00265	0.0191329	yes
ENSDARG00000076153	lca5	23:31453983-31474299	mut	Mo	OK	8.44594	6.06198	14.5079	-0.47847	-1.65639	0.0034	0.023335	yes
ENSDARG00000008403	phospho1	3:15656116-15661237	mut	Mo	OK	13.7527	9.87021	23.6229	-0.478562	-1.69468	0.00305	0.0213894	yes
ENSDARG00000033436	mboat7	16:32060521-32072303	mut	Mo	OK	8.1563	5.85105	14.0073	-0.479219	-1.59645	0.00575	0.0345597	yes
ENSDARG00000069171	gramd4a	4:28072420-28169047	mut	Mo	OK	0.83026	0.270883	1.10114	-1.61589	-2.92533	5e-05	0.000738265	yes
ENSDARG00000069250	uacaa	18:20058307-20093811	mut	Mo	OK	2.16177	1.03131	3.19308	-1.06774	-2.45452	5e-05	0.000738265	yes
ENSDARG00000069254	chrm4a	7:38909617-38935033	mut	Mo	OK	2.59703	1.61916	4.21619	-0.681619	-1.85169	0.00105	0.00918036	yes
ENSDARG00000069264	si:ch211-196h16.5	1:54156421-54211850	mut	Mo	OK	1.04013	0.390092	1.43022	-1.41489	-2.50597	0.0003	0.00340471	yes
[truncated: 1,522 more rows]
